# Supplementary material for: Integrated transcriptomic and metabolomic analyses reveal flavonoid and lipid metabolic reprogramming in Dendrobiumofficinale during Colletotrichum fructicola-induced anthracnose
Source: PeerJ. 2026 Jan 15;14:e20563. doi: 10.7717/peerj.20563 (PMC12812277; doi:10.7717/peerj.20563)
Supplement: Supplemental Information 2 [file peerj-14-20563-s002.xlsx]

## Sheet: Table S1
Table S1. Transcriptome analysis.
Sample	Raw Reads	Clean Reads	Clean Base(G)	Error Rate(%)	Q20(%)	Q30(%)	GC Content(%)
CK1	43295926	41407946	6.21	0.03	97.53	92.85	46.09
CK2	47476724	43330834	6.5	0.02	98.33	94.84	46.27
CK3	51488714	49435718	7.42	0.03	97.51	92.75	45.53
IN1	44413550	42464440	6.37	0.03	97.73	93.33	43.86
IN2	58948192	55517446	8.33	0.02	98.61	95.58	45.25
IN3	51038466	47922826	7.19	0.03	97.6	93.34	45.77

## Sheet: Table S2
Table S2. Metabolome analyses.
Compounds	Molecular Weight (Da)	Formula	FC	LOG2FC	Class I	Class II	kegg_map
Valproic Acid	144.115	C8H16O2	0.877108	-0.189173	Acid	-	--
Phytol, acetate	338.318	C22H42O2	2.80273	1.48683	Alcohol	-	--
4-Hexyn-3-ol	98.073	C6H10O	0.515889	-0.954868	Alcohol	-	--
1-Nonanol	144.151	C9H20O	0.815786	-0.293737	Alcohol	-	--
Benzenemethanol, 4-methyl-.alpha.-(1-methyl-2-propenyl)-, (R*,R*)-	176.12	C12H16O	0.776732	-0.364511	Alcohol	-	--
n-Tridecan-1-ol	200.214	C13H28O	1.21866	0.285294	Alcohol	-	--
2-Methyl-4-(2,6,6-trimethylcyclohex-2-enyl)but-3-en-2-ol	208.183	C14H24O	0.783056	-0.352813	Alcohol	-	--
2-hexyl-1-Decanol	242.261	C16H34O	1.34083	0.423127	Alcohol	-	--
3-FurAldehyde	96.021	C5H4O2	0.668866	-0.58021	Aldehyde	-	--
2-Hexenal, (E)-	98.073	C6H10O	0.52121	-0.940064	Aldehyde	-	--
Hexanal	100.089	C6H12O	0.652048	-0.616949	Aldehyde	-	--
Octanal	128.12	C8H16O	0.829613	-0.269489	Aldehyde	-	--
BenzAldehyde, 2,5-dimethyl-	134.073	C9H10O	1.33075	0.412234	Aldehyde	-	--
BenzAldehyde, 3-ethyl-	134.073	C9H10O	0.341632	-1.54949	Aldehyde	-	--
2,6-Nonadienal, (E,Z)-	138.104	C9H14O	0.801402	-0.319403	Aldehyde	-	--
Nonanal	142.136	C9H18O	0.804679	-0.313514	Aldehyde	-	--
6-Octenal, 7-methyl-3-methylene-	152.12	C10H16O	0.908359	-0.138665	Aldehyde	-	--
Decanal	156.151	C10H20O	0.991163	-0.012806	Aldehyde	-	--
Tridecanal	198.198	C13H26O	1.29791	0.376195	Aldehyde	-	--
2,6,10-trimethyl-9-Undecenal	210.198	C14H26O	0.976416	-0.0344323	Aldehyde	-	--
Tetradecanal	212.214	C14H28O	1.6432	0.716511	Aldehyde	-	--
Pentadecanal	226.23	C15H30O	1.59529	0.673818	Aldehyde	-	--
Putrescine	88.1	C4H12N2	0.353795	-1.49902	Alkaloids	Phenolamine	ko00330,ko00472,ko00480,ko00960,ko01100,ko01110,ko02010
N-Feruloyl-Cadaverine	278.163	C15H22N2O3	2.43757	1.28544	Alkaloids	Phenolamine	--
N-Methyldendrobine	278.193	C17H28NO2+	2.01048	1.00754	Alkaloids	Sesquiterpene alkaloids	--
Choline	103.091	C5H13NO	0.986056	-0.0202581	Alkaloids	Alkaloids	ko00260,ko00564,ko01100,ko02010
cis-N-p-Coumaroyltyramine	283.121	C17H17NO3	6.7576	2.75651	Alkaloids	Alkaloids	--
N-Cis-Feruloyltyramine	313.131	C18H19NO4	20.9768	4.39072	Alkaloids	Alkaloids	--
Indole	117.058	C8H7N	0.713313	-0.487393	Alkaloids	Plumerane	ko00380,ko00400,ko00402,ko01100,ko01110
Betaine	117.079	C5H11NO2	0.304029	-1.71772	Alkaloids	Alkaloids	ko00260,ko01100,ko02010
N-Feruloyltyramine	313.131	C18H19NO4	19.1428	4.25873	Alkaloids	Phenolamine	--
N-Cis-Feruloyl-3'-O-methyldopamine	343.142	C19H21NO5	7.3904	2.88565	Alkaloids	Alkaloids	--
N-Benzylmethylene isomethylamine	119.073	C8H9N	0.858052	-0.220863	Alkaloids	Alkaloids	--
N-Trans-Feruloyl-3'-O-methyldopamine	343.142	C19H21NO5	4.47873	2.16309	Alkaloids	Alkaloids	--
Isoquinoline	129.058	C9H7N	1.27164	0.346692	Alkaloids	Isoquinoline alkaloids	--
N-Acetylputrescine	130.111	C6H14N2O	0.793368	-0.333938	Alkaloids	Phenolamine	ko00330,ko01100
Agmatine	130.122	C5H14N4	0.871837	-0.197869	Alkaloids	Phenolamine	ko00330,ko01100
N-p-Coumaroylspermine	348.253	C19H32N4O2	6985.07	12.7701	Alkaloids	Phenolamine	--
N-Isopentenyl-6-hydroxydendroxinium	376.225	C22H34NO4+	8.04808	3.00865	Alkaloids	Alkaloids	--
N-Glucosyl-p-coumaroylputrescine	396.19	C19H28N2O7	4.0745	2.02662	Alkaloids	Phenolamine	--
N-benzylformamide	135.068	C8H9NO	0.0996352	-3.3272	Alkaloids	Alkaloids	--
Bis(Caffeoyl)Spermidine	469.221	C25H31N3O6	52809.6	15.6885	Alkaloids	Phenolamine	--
Trigonelline	137.048	C7H7NO2	1.01538	0.0220202	Alkaloids	Alkaloids	ko00760
Nicotinic Acid Methyl Ester(Methyl Nicotinate)	137.048	C7H7NO2	1.67476	0.743953	Alkaloids	Alkaloids	--
N',N''-Diferuloylspermidine	497.253	C27H35N3O6	23363.7	14.512	Alkaloids	Phenolamine	--
O-Phosphorylethanolamine	141.019	C2H8NO4P	0.998017	-0.00286421	Alkaloids	Alkaloids	ko00564,ko00600,ko01100
Stachydrine	143.095	C7H13NO2	0.287033	-1.80071	Alkaloids	Alkaloids	--
Indole-3-carboxaldehyde	145.053	C9H7NO	1.07434	0.103457	Alkaloids	Plumerane	--
N1,N8-Bis(sinapoyl)spermidine	557.274	C29H39N3O8	2.8482	1.51005	Alkaloids	Phenolamine	--
Spermidine	145.158	C7H19N3	0.625516	-0.67688	Alkaloids	Phenolamine	ko00330,ko00410,ko00480,ko00940,ko01100,ko02010
Acetylcholine	146.118	C7H16NO2	1.09778	0.134592	Alkaloids	Alkaloids	ko00564
4-Hydroxymandelonitrile	149.048	C8H7NO2	0.66736	-0.583463	Alkaloids	Alkaloids	--
Dopamine	153.079	C8H11NO2	0.178591	-2.48527	Alkaloids	Alkaloids	ko00350,ko00950,ko00965,ko01100,ko01110
Tryptamine	160.1	C10H12N2	0.602556	-0.730832	Alkaloids	Plumerane	ko00380,ko00901,ko01100,ko01110
Indole-3-carboxylic acid	161.048	C9H7NO2	0.669718	-0.578375	Alkaloids	Plumerane	--
Indole-5-carboxylic acid	161.048	C9H7NO2	0.337513	-1.56698	Alkaloids	Plumerane	--
DL-2-Aminoadipic acid	161.069	C6H11NO4	0.763342	-0.389598	Alkaloids	Alkaloids	ko00300,ko00310,ko00311,ko01100,ko01110,ko01210,ko01230
L-Carnitine	161.105	C7H15NO3	1.23163	0.300574	Alkaloids	Alkaloids	--
Nicotine	162.116	C10H14N2	0.871307	-0.198747	Alkaloids	Alkaloids	ko00960,ko01110
Hordenine	165.115	C10H15NO	0.290304	-1.78436	Alkaloids	Alkaloids	ko00350,ko01100
Serotonin*	176.095	C10H12N2O	0.746492	-0.421801	Alkaloids	Plumerane	ko00380,ko01100
N-Hydroxytryptamine*	176.095	C10H12N2O	0.562073	-0.83117	Alkaloids	Phenolamine	ko00380,ko01100
3-Indoleacrylic acid	187.063	C11H9NO2	0.707982	-0.498215	Alkaloids	Alkaloids	--
3-amino-2-naphthoic acid	187.063	C11H9O2N	0.703422	-0.507537	Alkaloids	Phenolamine	--
3-Indolepropionic acid	189.07	C11H11NO2	0.871674	-0.198139	Alkaloids	Plumerane	--
N-(4-Aminobutyl)benzamide	192.126	C11H16N2O	0.777035	-0.363949	Alkaloids	Phenolamine	--
Spermine	202.216	C10H26N4	0.981102	-0.0275248	Alkaloids	Phenolamine	ko00330,ko00410,ko00480,ko00770,ko01100
1-Methoxy-indole-3-acetamide	204.09	C11H12N2O2	0.733697	-0.446744	Alkaloids	Alkaloids	--
N-Acetyl-5-hydroxytryptamine	218.106	C12H14N2O2	0.590996	-0.758779	Alkaloids	Alkaloids	ko00380,ko01100
p-Coumaroylputrescine	234.137	C13H18N2O2	0.934112	-0.0983319	Alkaloids	Phenolamine	ko00330,ko01100
O-Acetyl-L-carnitine	239.092	C9H18ClNO4	0.876738	-0.189782	Alkaloids	Alkaloids	--
Lumichrome	242.08	C12H10N4O2	1.14233	0.191981	Alkaloids	Alkaloids	ko00740
N-Feruloylputrescine	264.147	C14H20N2O3	0.961648	-0.0564198	Alkaloids	Phenolamine	ko00330,ko01100
Dihydroferuloylputrescine	266.163	C14H22N2O3	0.854184	-0.227381	Alkaloids	Phenolamine	--
Sinapoylputrescine	294.158	C15H22N2O4	1.15196	0.204086	Alkaloids	Phenolamine	--
Sinapine	310.147	C16H24NO5+	0.420524	-1.24974	Alkaloids	Alkaloids	ko00940
2-(D-Glucosyloxy)-4-hydroxybenzeneacetonitrile	311.101	C14H17NO7	0.66215	-0.594771	Alkaloids	Alkaloids	--
N-Oleoylethanolamine	325.298	C20H39NO2	1.57749	0.65763	Alkaloids	Alkaloids	--
Cocamidopropyl betaine	342.288	C19H38N2O3	1.21986	0.28672	Alkaloids	Alkaloids	--
N-Isopentenyl-dendroxine	360.23	C22H34NO3+	1.68191	0.750102	Alkaloids	Sesquiterpene alkaloids	--
N,N'-Diferuloylputrescine	440.195	C24H28N2O6	0.294777	-1.7623	Alkaloids	Phenolamine	--
Sinapine-4-O-Glucoside	472.191	C22H34NO10+	0.697593	-0.519542	Alkaloids	Alkaloids	--
10-Formyltetrahydrofuran	473.166	C20H23N7O7	0.599285	-0.738685	Alkaloids	Alkaloids	ko00670,ko00970,ko01100,ko01200
Isodendrocrepine	516.335	C33H44N2O3	0.409835	-1.28689	Alkaloids	Alkaloids	--
Dendrocrepine	516.335	C33H44N2O3	1.1995	0.262431	Alkaloids	Alkaloids	--
N',N'',N'''-p-Coumaroyl-cinnamoyl-caffeoyl spermidine	583.268	C34H37N3O6	0.907861	-0.139457	Alkaloids	Phenolamine	--
Uridine 5'-diphospho-N-acetylglucosamine	607.082	C17H27N3O17P2	0.693903	-0.527194	Alkaloids	Alkaloids	ko00520,ko01100
5H-Tetrazol-5-Amine	85.039	CH3N5	0.798964	-0.323798	Amine	-	--
1H-Pyrrole-2,5-dione	97.016	C4H3NO2	0.893606	-0.16229	Amine	-	--
2-PyrrolidinemethanAmine, N-methyl-, (S)-	114.116	C6H14N2	0.897969	-0.155262	Amine	-	--
N,N-dibutyl-Formamide	157.147	C9H19NO	1.07654	0.106408	Amine	-	--
N-(2-hydroxyethyl)-Decanamide	215.189	C12H25NO2	0.960414	-0.0582716	Amine	-	--
N-decyl-N-methyl-4-FluorobenzylAmine	279.236	C18H30FN	0.840253	-0.251104	Amine	-	--
L-Glycine	75.032	C2H5NO2	0.287269	-1.79953	Amino acids and derivatives	Amino acids and derivatives	ko00230,ko00260,ko00310,ko00440,ko00460,ko00480,ko00630,ko00730,ko00860,ko00970,ko01100,ko01110,ko01200,ko01230,ko02010
N,N-Dimethylglycine	103.063	C4H9NO2	0.423641	-1.23909	Amino acids and derivatives	Amino acids and derivatives	ko00260,ko01100
2-Aminoisobutyric acid	103.063	C4H9NO2	1.05569	0.0781919	Amino acids and derivatives	Amino acids and derivatives	--
L-Serine	105.043	C3H7NO3	1.46467	0.550574	Amino acids and derivatives	Amino acids and derivatives	ko00260,ko00261,ko00270,ko00460,ko00600,ko00630,ko00920,ko00970,ko01100,ko01110,ko01200,ko01230,ko02010
Histamine	111.08	C5H9N3	0.873652	-0.194869	Amino acids and derivatives	Amino acids and derivatives	ko00340,ko01100,ko01110
L-Proline	115.063	C5H9NO2	0.776764	-0.364452	Amino acids and derivatives	Amino acids and derivatives	ko00330,ko00332,ko00970,ko01100,ko01110,ko01230,ko02010
5-Aminovaleric acid	117.079	C5H11NO2	0.442495	-1.17627	Amino acids and derivatives	Amino acids and derivatives	ko00310,ko00330,ko01100
L-Valine	117.079	C5H11NO2	0.98808	-0.0172995	Amino acids and derivatives	Amino acids and derivatives	ko00280,ko00290,ko00311,ko00460,ko00770,ko00966,ko00970,ko01100,ko01110,ko01210,ko01230,ko02010
L-Threonine*	119.058	C4H9NO3	1.23593	0.305599	Amino acids and derivatives	Amino acids and derivatives	ko00260,ko00261,ko00290,ko00860,ko00970,ko01100,ko01110,ko01230,ko02010
L-Cysteine	121.02	C3H7NO2S	1.52006	0.604128	Amino acids and derivatives	Amino acids and derivatives	ko00260,ko00270,ko00311,ko00332,ko00430,ko00460,ko00480,ko00730,ko00770,ko00920,ko00970,ko01100,ko01110,ko01200,ko01230,ko04122
Pipecolic acid*	129.079	C6H11NO2	0.998015	-0.00286617	Amino acids and derivatives	Amino acids and derivatives	ko00310,ko00960,ko01100,ko01110
Cycloleucine*	129.079	C6H11NO2	0.926198	-0.110608	Amino acids and derivatives	Amino acids and derivatives	--
cis-4-Hydroxy-D-proline	131.058	C5H9NO3	0.76484	-0.386769	Amino acids and derivatives	Amino acids and derivatives	ko00330,ko01100
N-Propionylglycine	131.058	C5H9NO3	1.14457	0.194804	Amino acids and derivatives	Amino acids and derivatives	--
Trans-4-Hydroxy-L-proline	131.058	C5H9NO3	1.31149	0.391212	Amino acids and derivatives	Amino acids and derivatives	ko00330,ko01100,ko02010
L-Allo-isoleucine	131.095	C6H13NO2	1.11694	0.159553	Amino acids and derivatives	Amino acids and derivatives	--
L-Norleucine	131.095	C6H13NO2	1.98387	0.988315	Amino acids and derivatives	Amino acids and derivatives	--
L-Ornithine	132.09	C5H12N2O2	0.739942	-0.434515	Amino acids and derivatives	Amino acids and derivatives	ko00220,ko00330,ko00472,ko00480,ko01100,ko01110,ko01210,ko01230,ko02010
L-Aspartic Acid	133.038	C4H7NO4	0.479408	-1.06067	Amino acids and derivatives	Amino acids and derivatives	ko00220,ko00250,ko00260,ko00261,ko00270,ko00300,ko00340,ko00410,ko00460,ko00710,ko00760,ko00770,ko00970,ko01100,ko01110,ko01200,ko01210,ko01230,ko02010
L-Tyramine	137.084	C8H11NO	0.55242	-0.856162	Amino acids and derivatives	Amino acids and derivatives	ko00350,ko00950,ko01100,ko01110
1-Methylpiperidine-2-carboxylic acid	143.095	C7H13NO2	0.345784	-1.53205	Amino acids and derivatives	Amino acids and derivatives	--
L-Cyclopentylglycine	143.095	C7H13NO2	1.08379	0.116087	Amino acids and derivatives	Amino acids and derivatives	--
D-Proline betaine	144.092	C7H14NO2+	0.312689	-1.6772	Amino acids and derivatives	Amino acids and derivatives	--
N-Methyl-Trans-4-Hydroxy-L-Proline	145.074	C6H11NO3	0.753884	-0.407586	Amino acids and derivatives	Amino acids and derivatives	--
L-Glutamine	146.069	C5H10N2O3	0.93159	-0.102232	Amino acids and derivatives	Amino acids and derivatives	ko00220,ko00230,ko00240,ko00250,ko00630,ko00750,ko00910,ko00970,ko01100,ko01230,ko02010
L-Lysine	146.106	C6H14N2O2	0.846968	-0.239621	Amino acids and derivatives	Amino acids and derivatives	ko00300,ko00310,ko00780,ko00960,ko00970,ko01100,ko01110,ko01210,ko01230,ko02010
L-Glutamic acid	147.053	C5H9NO4	1.03356	0.0476199	Amino acids and derivatives	Amino acids and derivatives	ko00220,ko00250,ko00330,ko00332,ko00340,ko00430,ko00480,ko00630,ko00650,ko00660,ko00860,ko00910,ko00970,ko01100,ko01110,ko01200,ko01210,ko01230,ko02010
O-Acetylserine	147.053	C5H9NO4	0.548481	-0.866488	Amino acids and derivatives	Amino acids and derivatives	ko00270,ko00908,ko00920,ko01100,ko01110,ko01200,ko01230,ko04122
L-Methionine	149.051	C5H11NO2S	0.665842	-0.586749	Amino acids and derivatives	Amino acids and derivatives	ko00270,ko00966,ko00970,ko01100,ko01110,ko01210,ko01230
L-Isoleucine*	131.095	C6H13NO2	2.07745	1.05481	Amino acids and derivatives	Amino acids and derivatives	ko00280,ko00290,ko00460,ko00960,ko00966,ko00970,ko01100,ko01110,ko01210,ko01230,ko02010
L-Leucine*	131.095	C6H13NO2	2.02838	1.02032	Amino acids and derivatives	Amino acids and derivatives	ko00280,ko00290,ko00966,ko00970,ko01100,ko01110,ko01210,ko01230,ko02010
L-Histidine	155.069	C6H9N3O2	0.292998	-1.77104	Amino acids and derivatives	Amino acids and derivatives	ko00340,ko00410,ko00970,ko01100,ko01110,ko01230,ko02010
N-Acetyl-L-Glutamine	188.08	C7H12N2O4	2.04928	1.03512	Amino acids and derivatives	Amino acids and derivatives	--
S-Allyl-L-cysteine	161.051	C6H11NO2S	0.627351	-0.672656	Amino acids and derivatives	Amino acids and derivatives	--
N-Acetyl-L-threonine	161.069	C6H11NO4	1.45611	0.54212	Amino acids and derivatives	Amino acids and derivatives	--
3-Hydroxy-3-methylpentane-1,5-dioic acid	162.053	C6H10O5	0.37155	-1.42837	Amino acids and derivatives	Amino acids and derivatives	--
L-Methionine methyl ester	163.067	C6H13NO2S	0.323702	-1.62726	Amino acids and derivatives	Amino acids and derivatives	--
L-α-Glutamyl-L-Glutamic Acid	276.096	C10H16N2O7	2.17047	1.11801	Amino acids and derivatives	Amino acids and derivatives	--
L-Methionine Sulfoxide	165.046	C5H11NO3S	1.00224	0.00322337	Amino acids and derivatives	Amino acids and derivatives	ko00270
L-Phenylalanine	165.07	C9H11NO2	0.863917	-0.211035	Amino acids and derivatives	Amino acids and derivatives	ko00360,ko00400,ko00460,ko00940,ko00960,ko00966,ko00970,ko00998,ko01100,ko01110,ko01210,ko01230,ko02010
3-Methyl-L-Histidine	169.085	C7H11N3O2	1.08155	0.113099	Amino acids and derivatives	Amino acids and derivatives	ko00340,ko01100
L-Glycyl-L-proline	172.085	C7H12N2O3	0.620997	-0.687341	Amino acids and derivatives	Amino acids and derivatives	--
Tyramine	173.061	C8H11NO	0.0612298	-4.02962	Amino acids and derivatives	Amino acids and derivatives	--
N-α-Acetyl-L-ornithine	174.1	C7H14N2O3	0.601228	-0.734015	Amino acids and derivatives	Amino acids and derivatives	ko00220,ko01100,ko01110,ko01210,ko01230
L-Arginine	174.112	C6H14N4O2	1.3188	0.399224	Amino acids and derivatives	Amino acids and derivatives	ko00220,ko00261,ko00330,ko00472,ko00970,ko01100,ko01110,ko01230,ko02010
N-Acetyl-L-Aspartic Acid	175.048	C6H9NO5	0.96212	-0.0557119	Amino acids and derivatives	Amino acids and derivatives	ko00250,ko01100
L-Citrulline	175.096	C6H13N3O3	1.30583	0.384964	Amino acids and derivatives	Amino acids and derivatives	ko00220,ko01100,ko01110,ko01230
L-Tyrosine	181.074	C9H11NO3	1.39265	0.477829	Amino acids and derivatives	Amino acids and derivatives	ko00130,ko00261,ko00350,ko00360,ko00400,ko00460,ko00730,ko00940,ko00950,ko00965,ko00966,ko00970,ko00998,ko01100,ko01110,ko01210,ko01230
N6-Acetyl-L-lysine	188.116	C8H16N2O3	0.097212	-3.36272	Amino acids and derivatives	Amino acids and derivatives	ko00310,ko01100
L-Glycyl-L-isoleucine*	188.116	C8H16N2O3	0.581862	-0.78125	Amino acids and derivatives	Amino acids and derivatives	--
N-Glycyl-L-leucine*	188.116	C8H16N2O3	0.533108	-0.9075	Amino acids and derivatives	Amino acids and derivatives	--
N-Monomethyl-L-arginine	188.127	C7H16N4O2	1.13408	0.181519	Amino acids and derivatives	Amino acids and derivatives	--
Homoarginine	188.127	C7H16N4O2	0.914551	-0.128865	Amino acids and derivatives	Amino acids and derivatives	--
N-Acetyl-L-glutamic acid	189.064	C7H11NO5	0.831626	-0.265993	Amino acids and derivatives	Amino acids and derivatives	ko00220,ko01100,ko01110,ko01210,ko01230
L-Homocitrulline	189.111	C7H15N3O3	0.0581043	-4.10521	Amino acids and derivatives	Amino acids and derivatives	--
N-Phenylacetylglycine	193.074	C10H11NO3	0.448039	-1.1583	Amino acids and derivatives	Amino acids and derivatives	ko00360
3,4-Dihydroxy-L-phenylalanine (L-Dopa)	197.069	C9H11NO4	1.20103	0.264274	Amino acids and derivatives	Amino acids and derivatives	ko00350,ko00950,ko00965,ko01100,ko01110
NG,NG-Dimethyl-L-arginine	202.143	C8H18N4O2	0.271374	-1.88165	Amino acids and derivatives	Amino acids and derivatives	--
DL-Tryptophan	204.09	C11H12N2O2	0.761161	-0.393727	Amino acids and derivatives	Amino acids and derivatives	--
L-Tryptophan	204.09	C11H12N2O2	0.642374	-0.638514	Amino acids and derivatives	Amino acids and derivatives	ko00260,ko00380,ko00400,ko00901,ko00966,ko00970,ko00998,ko01100,ko01110,ko01210,ko01230
N-Acetyl-L-phenylalanine	207.09	C11H13NO3	0.884998	-0.176254	Amino acids and derivatives	Amino acids and derivatives	ko00360,ko01100
N-Acetyl-L-Arginine	216.122	C8H16N4O3	0.580016	-0.785835	Amino acids and derivatives	Amino acids and derivatives	--
5-L-Glutamyl-L-amino acid	218.09	C8H14N2O5	1.40825	0.493899	Amino acids and derivatives	Amino acids and derivatives	--
5-Hydroxy-L-tryptophan	220.085	C11H12N2O3	0.39506	-1.33986	Amino acids and derivatives	Amino acids and derivatives	ko00380,ko01100
L-Glycyl-L-phenylalanine	222.1	C11H14N2O3	0.611659	-0.709199	Amino acids and derivatives	Amino acids and derivatives	--
Glycylphenylalanine	222.1	C11H14N2O3	0.560921	-0.83413	Amino acids and derivatives	Amino acids and derivatives	--
N-Acetyl-L-tyrosine	223.084	C11H13NO4	0.723107	-0.467719	Amino acids and derivatives	Amino acids and derivatives	--
L-Carnosine	226.107	C9H14N4O3	1.22435	0.292011	Amino acids and derivatives	Amino acids and derivatives	ko00340,ko00410,ko01100
L-Alanyl-L-Phenylalanine	236.116	C12H16N2O3	0.596435	-0.745563	Amino acids and derivatives	Amino acids and derivatives	--
L-Cystine	240.024	C6H12N2O4S2	1.79115	0.840885	Amino acids and derivatives	Amino acids and derivatives	ko00270,ko01100,ko02010
Cyclo(Pro-Phe)	245.128	C14H16N2O2	0.370081	-1.43409	Amino acids and derivatives	Amino acids and derivatives	--
N-Acetyl-L-Tryptophan	246.1	C13H14N2O3	0.139036	-2.84647	Amino acids and derivatives	Amino acids and derivatives	--
L-Isoleucyl-L-Aspartate	246.121	C10H18N2O5	0.236078	-2.08267	Amino acids and derivatives	Amino acids and derivatives	--
L-γ-Glutamyl-L-leucine	260.137	C11H20N2O5	0.049377	-4.34002	Amino acids and derivatives	Amino acids and derivatives	--
L-Saccharopine	276.132	C11H20N2O6	0.563548	-0.82739	Amino acids and derivatives	Amino acids and derivatives	ko00300,ko00310,ko01100,ko01110,ko01230
L-Aspartyl-L-Phenylalanine	280.106	C13H16N2O5	0.786339	-0.346777	Amino acids and derivatives	Amino acids and derivatives	--
Nicotianamine	303.143	C12H21N3O6	0.278752	-1.84295	Amino acids and derivatives	Amino acids and derivatives	--
Glutathione reduced form	307.084	C10H17N3O6S	0.890473	-0.167357	Amino acids and derivatives	Amino acids and derivatives	ko00270,ko00480,ko01100,ko02010
S-(Methyl)glutathione	321.099	C11H19N3O6S	0.498934	-1.00308	Amino acids and derivatives	Amino acids and derivatives	--
S-(5'-Adenosy)-L-homocysteine	384.122	C14H20N6O5S	0.658532	-0.602674	Amino acids and derivatives	Amino acids and derivatives	ko00270,ko01100,ko01230
S-Adenosyl-L-methionine	398.137	C15H22N6O5S	1.01573	0.0225138	Amino acids and derivatives	Amino acids and derivatives	ko00261,ko00270,ko00330,ko00908,ko01100,ko01110,ko01230,ko04122
Oxiglutatione	612.152	C20H32N6O12S2	1.35274	0.435881	Amino acids and derivatives	Amino acids and derivatives	ko00480,ko01100
Benzene, 1-methyl-3-(1-methylethenyl)-	132.094	C10H12	2.80616	1.4886	Aromatics	-	--
1,2,3,4-tetramethyl-Benzene	134.11	C10H14	2.60423	1.38086	Aromatics	-	--
1,3-dimethyl-1H-Indene	144.094	C11H12	2.30875	1.20711	Aromatics	-	--
1H-Indene, 1,1,3-trimethyl-	158.11	C12H14	2.15335	1.10658	Aromatics	-	--
1,4,6-trimethyl-Naphthalene	170.11	C13H14	3.20038	1.67824	Aromatics	-	--
Naphthalene, 1,2-dihydro-4,5,7-trimethyl-	172.125	C13H16	3.57877	1.83946	Aromatics	-	--
4-(1,1-dimethyl-2-propynyloxy)-Toluene	174.104	C12H14O	2.30972	1.20772	Aromatics	-	--
2,3-dihydro-1,1,4,6-tetramethyl-1H-Indene	174.141	C13H18	2.22016	1.15066	Aromatics	-	--
1,2,3,4-tetrahydro-1,6,8-trimethyl-Naphthalene	174.141	C13H18	2.23198	1.15832	Aromatics	-	--
1,2,3,4-tetrahydro-1,5,7-trimethyl-Naphthalene	174.141	C13H18	2.35993	1.23874	Aromatics	-	--
Naphthalene, 1,2,3,4-tetrahydro-1,4,6-trimethyl-	174.141	C13H18	2.6413	1.40125	Aromatics	-	--
Benzene, tert-butyl-	134.11	C10H14	1.5961	0.674549	Aromatics	-	--
Benzene, 1,2,3,5-tetramethyl-	134.11	C10H14	1.69516	0.761422	Aromatics	-	--
2,3-dihydro-4,6-dimethyl-1H-Indene	146.11	C11H14	1.25619	0.329055	Aromatics	-	--
4-Methylphenol, 2-methylpropyl ether	164.12	C11H16O	0.903336	-0.146666	Aromatics	-	--
9H-Fluoren-9-one	180.058	C13H8O	0.905668	-0.142945	Aromatics	-	ko01100
1-butoxy-4-methoxy-Benzene	180.115	C11H16O2	0.786139	-0.347143	Aromatics	-	--
1,1,4,5,6-Pentamethyl-2,3-dihydro-1H-indene	188.157	C14H20	1.35155	0.434615	Aromatics	-	--
(1-methylheptyl)-Benzene	190.172	C14H22	1.17135	0.228173	Aromatics	-	--
Benzene, 1,2-diethyl-3,4,5,6-tetramethyl-	190.172	C14H22	1.16843	0.224567	Aromatics	-	--
9H-Fluorene, 1,9-dimethyl-	194.11	C15H14	0.862889	-0.212754	Aromatics	-	--
Isoelemicin	208.11	C12H16O3	1.7196	0.782077	Aromatics	-	--
cis-1,1'-(1,2-cyclobutanediyl)bis-Benzene	208.125	C16H16	0.765778	-0.385002	Aromatics	-	--
2H-1-Benzopyran, 6,7-dimethoxy-2,2-dimethyl-	220.11	C13H16O3	1.13232	0.179281	Aromatics	-	--
O-(3-methylbut-2-enoyl)-O'-(pivaloyl)-1,2-Benzenediol	276.136	C16H20O4	0.607398	-0.719285	Aromatics	-	--
4-Ethylphenyl acetate	164.084	C10H12O2	4477.19	12.1284	Ester	-	--
2-Methoxy-5-methylphenol, acetate	180.079	C10H12O3	2.79875	1.48478	Ester	-	--
2-tert-Butyl-6-methylphenol, acetate	206.131	C13H18O2	4.42755	2.14651	Ester	-	--
5-Oxotetrahydrofuran-2-carboxylic acid, ethyl ester	158.058	C7H10O4	0.920432	-0.119617	Ester	-	--
(E)-2-methyl-2-Butenoic acid,3-methyl-3-butenyl ester	168.115	C10H16O2	0.990235	-0.014157	Ester	-	--
Ethyl mandelate	180.079	C10H12O3	0.889753	-0.168523	Ester	-	--
2-Ethylhexyl acrylate	184.146	C11H20O2	1.33271	0.414359	Ester	-	--
2-Cyclohexen-1-ol, 2-methyl-5-(1-methylethenyl)-, acetate	194.131	C12H18O2	0.748675	-0.417588	Ester	-	--
2-Furancarboxylic acid, hexyl ester	196.11	C11H16O3	0.969292	-0.0449967	Ester	-	--
2-(2-butoxyethoxy)-Ethanol,acetate	204.136	C10H20O4	1.01412	0.0202302	Ester	-	--
Cyclohexyl propylphosphonofluoridate	208.103	C9H18FO2P	1.46647	0.552349	Ester	-	--
Sulfurous acid, isobutyl pentyl ester	208.113	C9H20O3S	1.13543	0.183243	Ester	-	--
3-Methylbut-2-enoic acid, 4-nitrophenyl ester	221.069	C11H11NO4	1.23531	0.304871	Ester	-	--
Diethyl Phthalate	222.089	C12H14O4	0.928925	-0.106366	Ester	-	--
Fumaric acid, dicyclobutyl ester	224.105	C12H16O4	0.960414	-0.0582716	Ester	-	--
Benzoic acid, 2-ethylhexyl ester	234.162	C15H22O2	0.885287	-0.175783	Ester	-	--
Isopropyl myristate	270.256	C17H34O2	0.55179	-0.857808	Ester	-	--
Isopropyl palmitate	298.287	C19H38O2	0.483852	-1.04736	Ester	-	--
Hexadecanoic acid, butyl ester	312.303	C20H40O2	0.882362	-0.180557	Ester	-	--
Phthalic acid, hept-4-yl isobutyl ester	320.199	C19H28O4	1.04653	0.0656164	Ester	-	--
Isophthalic acid, butyl 3,5-difluorophenyl ester	334.102	C18H16F2O4	1.74976	0.807161	Ester	-	--
Sulfurous acid, 2-ethylhexyl undecyl ester	348.27	C19H40O3S	1.51689	0.601115	Ester	-	--
4-fluoro-3-nitro-benzoic acid, 2,4-bis(1,1-dimethylpropyl)phenyl ester	401.178	C29H23NO	1.16293	0.21777	Ester	-	--
Benzene, (butoxymethyl)-	164.12	C11H16O	0.978418	-0.0314775	Ether	-	--
Chrysin	254.058	C15H10O4	2.91334	1.54267	Flavonoids	Flavonoid	ko00941
Pinocembrin (Dihydrochrysin)	256.074	C15H12O4	2.14794	1.10295	Flavonoids	Dihydroflavone	ko00941
3',4',7-Trihydroxyflavone	270.053	C15H10O5	1296.22	10.3401	Flavonoids	Flavonoid	--
Galangin (3,5,7-Trihydroxyflavone)	270.053	C15H10O5	6.35126	2.66704	Flavonoids	Flavonoid	ko00941
Pinostrobin Chalcone	270.089	C16H14O4	13.8825	3.7952	Flavonoids	Chalcones	--
Butin	272.068	C15H12O5	13.1679	3.71895	Flavonoids	Dihydroflavone	ko00941
Naringenin chalcone*	272.068	C15H12O5	10.6648	3.41479	Flavonoids	Chalcones	ko00941,ko01100,ko01110
Naringenin (5,7,4'-Trihydroxyflavanone)	272.068	C15H12O5	12.5438	3.6489	Flavonoids	Dihydroflavone	ko00941,ko00943,ko01100,ko01110
(±)-Naringenin; 4',5,7-Trihydroxyflavanone	272.068	C15H12O5	13.3434	3.73806	Flavonoids	Flavonoid	--
Pinobanksin*	272.068	C15H12O5	10.4955	3.3917	Flavonoids	Dihydroflavonol	ko00941
Phloretin	274.084	C15H14O5	31.8947	4.99524	Flavonoids	Chalcones	ko00941,ko01110
3'-Methoxydaidzein	284.068	C16H12O5	44.6045	5.47912	Flavonoids	Isoflavones	--
Calycosin	284.068	C16H12O5	1920.56	10.9073	Flavonoids	Isoflavones	ko00943,ko01110
Genkwanin (Apigenin 7-methyl ether)	284.068	C16H12O5	38.9003	5.28171	Flavonoids	Flavonoid	--
Prunetin (5,4'-Dihydroxy-7-methoxyisoflavone)	284.068	C16H12O5	39.0585	5.28756	Flavonoids	Isoflavones	ko00943
Acacetin	284.068	C16H12O5	6552.96	12.6779	Flavonoids	Flavonoid	ko00944
Eriodictyol (5,7,3',4'-Tetrahydroxyflavanone)	288.063	C15H12O6	29.0996	4.86293	Flavonoids	Dihydroflavone	ko00941,ko01100,ko01110
2-hydroxynaringenin	288.063	C15H12O6	1139.67	10.1544	Flavonoids	Flavonoid	--
Pterocarpine	298.084	C17H14O5	492.085	8.94276	Flavonoids	Isoflavones	--
Cajanin	300.063	C16H12O6	2.15498	1.10767	Flavonoids	Isoflavones	--
Homoeriodictyol	302.079	C16H14O6	4.93643	2.30347	Flavonoids	Dihydroflavone	ko00941
Hesperetin	302.079	C16H14O6	7.7082	2.94639	Flavonoids	Dihydroflavone	ko00941
7-O-Methyleriodictyol	302.079	C16H14O6	23322.6	14.5094	Flavonoids	Flavanols	--
Dihydroquercetin(Taxifolin)	304.058	C15H12O7	4.91941	2.29849	Flavonoids	Dihydroflavonol	ko00941,ko01100,ko01110
5,2'-Dihydroxy-7,8-dimethoxyflavone	314.079	C17H14O6	2.70387	1.43503	Flavonoids	Flavonoid	--
Tamarixetin (3,3',5,7-Tetrahydroxy-4'-Methoxyflavone)	316.058	C16H12O7	3.09242	1.62874	Flavonoids	Flavonoid	--
Isorhamnetin	316.058	C16H12O7	2.74287	1.45569	Flavonoids	Flavonols	--
Azaleatin (5-O-Methylquercetin)	316.058	C16H12O7	9.26419	3.21167	Flavonoids	Flavonols	--
Tricin (5,7,4'-Trihydroxy-3',5'-dimethoxyflavone)	330.074	C17H14O7	3.11737	1.64033	Flavonoids	Flavonoid	--
Syringetin	346.069	C17H14O8	12.3977	3.632	Flavonoids	Flavonoid	ko00944
Apigenin-8-C-Arabinoside	402.095	C20H18O9	2.71722	1.44213	Flavonoids	Flavonoid	--
Epicatechin glucoside	452.131	C21H24O11	19.554	4.28939	Flavonoids	Flavanols	--
Myricetin-3-O-glucoside*	480.09	C21H20O13	2.49547	1.31931	Flavonoids	Flavonols	--
Myricetin-3-O-galactoside*	480.09	C21H20O13	2.58868	1.37222	Flavonoids	Flavonols	--
Limocitrin-3-O-galactoside	508.121	C23H24O13	2.32353	1.21632	Flavonoids	Flavonoid	--
5,6,3′,4′-Tetrahydroxy-3,7-dimethoxyflavone-6-O-glucoside	508.122	C23H24O13	2.4889	1.31551	Flavonoids	Flavonoid	--
Syringetin-7-O-glucoside	508.122	C23H24O13	2.3479	1.23137	Flavonoids	Flavonoid	--
Tricin-7-O-saccharic acid	522.101	C23H22O14	2.13549	1.09457	Flavonoids	Flavonoid	--
Genistein-8-C-apiosyl(1→6)glucoside	564.148	C26H28O14	6.65994	2.73551	Flavonoids	Isoflavones	--
Isovitexin-8-O-xylcoside	564.148	C26H28O14	3.16014	1.65999	Flavonoids	Flavonoid carbonoside	--
Apigenin-7-O-(2''-glucosyl)arabinoside	564.148	C26H28O14	509.857	8.99395	Flavonoids	Flavonoid	--
Apigenin-6-C-(2''-xylosyl)glucoside	564.148	C26H28O14	1.09506e+06	20.0626	Flavonoids	Flavonoid carbonoside	--
Hispidulin-8-C-(2''-O-xylosyl)xyloside	564.148	C26H28O14	49.7441	5.63645	Flavonoids	Flavonoid carbonoside	--
Apigenin-6-C-(2''-glucuronyl)xyloside	578.127	C26H26O15	52.0082	5.70067	Flavonoids	Flavonoid carbonoside	--
Vitexin-2''-O-rhamnoside	578.164	C27H30O14	57.155	5.83681	Flavonoids	Flavonoid carbonoside	ko00944
Apigenin-7-O-rutinoside (Isorhoifolin)	578.164	C27H30O14	2.60185	1.37954	Flavonoids	Flavonoid	--
Isovitexin-2''-O-rhamnoside	578.164	C27H30O14	43.5546	5.44475	Flavonoids	Flavonoid carbonoside	--
Kaempferol-3-O-sambubioside	580.142	C26H28O15	63752.6	15.9602	Flavonoids	Flavonoid	--
Luteolin-6-C-arabinoside-7-O-glucoside	580.143	C26H28O15	28175.9	14.7822	Flavonoids	Flavonoid carbonoside	--
Luteolin-7-O-glucoside-5-O-arabinoside	580.143	C26H28O15	75.6433	6.24114	Flavonoids	Flavonoid	--
Vitexin-2"-O-galactoside	594.158	C27H30O15	38.362	5.26161	Flavonoids	Flavonoid	--
4'-O-Glucosylvitexin	594.158	C27H30O15	39.1477	5.29085	Flavonoids	Flavonoid	--
5,7,4'-Trihydroxy-8-methoxyflavone-6-C-[Xylosyl-(1-2)]-glucoside	594.158	C27H30O15	4.06114	2.02188	Flavonoids	Flavonoid carbonoside	--
Hispidulin-8-C-(2''-O-xylosyl)glucoside	594.158	C27H30O15	4.01048	2.00377	Flavonoids	Flavonoid carbonoside	--
Isosaponarin(Isovitexin-4'-O-glucoside)	594.158	C27H30O15	648.325	9.34057	Flavonoids	Flavonoid carbonoside	--
Diosmetin-8-C-(2''-O-arabinosyl)glucoside	594.158	C27H30O15	3.51519	1.8136	Flavonoids	Flavonoid carbonoside	--
Diosmetin-7-O-rutinoside (Diosmin)	608.174	C28H32O15	2545.78	11.3139	Flavonoids	Flavonoid	--
Diosmetin-8-C-(2''-O-rhamnosyl)glucoside	608.174	C28H32O15	9.35016	3.22499	Flavonoids	Flavonoid carbonoside	--
Gallocatechin-(4α→8)-gallocatechin	610.132	C30H26O14	37076.7	15.1782	Flavonoids	Flavanols	--
Orientin-2''-O-galactoside	610.153	C27H30O16	1.88389e+06	20.8453	Flavonoids	Flavonoid	--
Isoluteolin-6,8-di-C-glucoside	610.153	C27H30O16	44169.3	15.4308	Flavonoids	Flavonoid	--
Kaempferol-3,7-di-O-glucoside	610.153	C27H30O16	219063	17.741	Flavonoids	Flavonoid	--
Luteolin-7-O-gentiobioside	610.153	C27H30O16	50.7544	5.66546	Flavonoids	Flavonoid	--
Chrysoeriol-5,7-di-O-glucoside	624.168	C28H32O16	14.0089	3.80827	Flavonoids	Flavonoid	--
Luteolin (5,7,3',4'-Tetrahydroxyflavone)	286.048	C15H10O6	1.26395	0.337936	Flavonoids	Flavonoid	ko00941,ko00944,ko01100,ko01110
Kaempferol (3,5,7,4'-Tetrahydroxyflavone)	286.048	C15H10O6	0.956637	-0.0639562	Flavonoids	Flavonols	ko00941,ko00944,ko01100,ko01110
Chrysoeriol-7-O-gentiobioside	624.169	C28H32O16	9.13699	3.19172	Flavonoids	Flavonoid	--
Hispidulin-8-C-(2''-O-glucosyl)glucoside	624.169	C28H32O16	11.7307	3.55221	Flavonoids	Flavonoid carbonoside	--
Chrysoeriol-6-C-glucoside-4'-O-glucoside	624.17	C28H32O16	11.5572	3.53072	Flavonoids	Flavonoid	--
Aromadendrin (Dihydrokaempferol)	288.063	C15H12O6	1.7962	0.844944	Flavonoids	Dihydroflavonol	ko00941,ko01100,ko01110
Hesperetin-5,7-di-O-glucoside	626.185	C28H34O16	4.55663	2.18797	Flavonoids	Dihydroflavonol	--
Cirsimaritin-8-C-[glucosyl-(1-2)]-glucoside	638.185	C29H34O16	7.74514	2.95329	Flavonoids	Flavonoid carbonoside	--
Apigenin-7-O-(2''-O-apiosyl)(6''-Malonyl)glucoside	650.142	C29H30O17	5644.48	12.4626	Flavonoids	Flavonoid	ko00944
Quercetin-3-O-(6''-malonyl)glucosyl-5-O-glucoside	712.149	C30H32O20	47.4307	5.56775	Flavonoids	Flavonols	--
Isorhamnetin-3-O-(6''-malonylglucoside)-7-O-glucoside	726.164	C31H34O20	5.13893	2.36147	Flavonoids	Flavonols	--
Naringenin-7-O-Rutinoside-4'-O-glucoside	742.232	C33H42O19	6.32761	2.66166	Flavonoids	Flavonoid	--
Apigenin-6,8-di-C-glucoside-4'-O-glucoside	756.211	C33H40O20	22105.9	14.4321	Flavonoids	Flavonoid	--
6-Hydroxykaempferol 3,6,7-triglucoside	788.201	C33H40O22	2.10608	1.07456	Flavonoids	Flavonoid	--
6-Hydroxykaempferol-3,7,6-O-triglycoside	788.201	C33H40O22	14.7388	3.88155	Flavonoids	Flavonols	--
6,7,8-Tetrahydroxy-5-methoxyflavone	300.063	C16H12O6	1.02512	0.0357915	Flavonoids	Flavonoid	--
Chrysoeriol*	300.063	C16H12O6	1.69734	0.763272	Flavonoids	Flavonoid	ko00944
Pratensein	300.063	C16H12O6	1.17737	0.235571	Flavonoids	Isoflavones	ko00943
Hispidulin (5,7,4'-Trihydroxy-6-methoxyflavone)*	300.063	C16H12O6	1.62776	0.70289	Flavonoids	Flavonoid	--
Diosmetin (5,7,3'-Trihydroxy-4'-methoxyflavone)*	300.063	C16H12O6	1.60532	0.68286	Flavonoids	Flavonoid	--
Quercetin-3-O-[2''-O-(6'''-sinapoyl)glucosyl]glucoside	832.206	C38H40O21	2.45353	1.29486	Flavonoids	Flavonols	--
Rhamnocitrin (7-Methylkaempferol)*	300.063	C16H12O6	1.19645	0.258755	Flavonoids	Flavonoid	--
Aracarpene 2	300.063	C16H12O6	1.58517	0.664642	Flavonoids	Isoflavones	--
Naringenin-4',7-dimethyl ether	300.1	C17H16O5	1.10024	0.137817	Flavonoids	Flavonoid	--
Quercetin-3-O-(6''-sinapoyl)glucoside-7-O-rutinoside	978.264	C44H50O25	3.37554	1.75512	Flavonoids	Flavonols	--
Quercetin	302.043	C15H10O7	1.01803	0.02578	Flavonoids	Flavonoid	ko00941,ko00944,ko01100,ko01110
6-Hydroxyluteolin	302.043	C15H10O7	0.852205	-0.230727	Flavonoids	Flavonoid	--
Dihydrokaempferide	302.079	C16H14O6	0.430993	-1.21426	Flavonoids	Flavonols	--
3-O-Acetylpinobanksin	314.079	C17H14O6	1.46736	0.553219	Flavonoids	Dihydroflavonol	ko00941
Selagin	316.058	C16H12O7	0.648933	-0.623859	Flavonoids	Flavonoid	--
Nepetin (5,7,3',4'-Tetrahydroxy-6-methoxyflavone)	316.058	C16H12O7	0.189973	-2.39614	Flavonoids	Flavonoid	--
2-Glucosyloxy-(4-hydroxyphenyl)acetic acid (Dhurrin acid)	330.095	C14H18O9	0.473257	-1.0793	Flavonoids	Flavonoid	--
5,7,8,4'-Tetramethoxyflavone	342.11	C19H18O6	0.967331	-0.0479187	Flavonoids	Flavonoid	--
5,6,7,4'-Tetramethoxyflavone	342.11	C19H18O6	1.03859	0.0546225	Flavonoids	Flavonoid	--
Cirsilineol (4',5-Dihydroxy-3',6,7-trimethoxyflavone)	344.09	C18H16O7	0.699177	-0.51627	Flavonoids	Flavonoid	--
Tangeretin (4',5,6,7,8-Pentamethoxyflavone)	372.121	C20H20O7	0.959458	-0.0597088	Flavonoids	Flavonols	--
2'-Hydroxy-3,4,5,4',6'-pentamethoxychalcone	374.124	C20H22O7	0.38117	-1.39149	Flavonoids	Chalcones	--
5-Hydroxy-6,7,8,3',4'-pentamethoxyflavone	388.116	C20H20O8	0.765702	-0.385146	Flavonoids	Flavonoid	--
Nobiletin (5,6,7,8,3',4'-Hexamethoxyflavone)	402.131	C21H22O8	0.995792	-0.00608427	Flavonoids	Flavonoid	--
Kaempferol-3-O-arabinoside (Juglanin)	418.09	C20H18O10	1.32974	0.411139	Flavonoids	Flavonols	--
Kaempferol-3-O-arabinoside	418.09	C20H18O10	1.95876	0.969943	Flavonoids	Flavonoid	--
Genistein-8-C-glucoside	432.106	C21H20O10	0.455898	-1.13322	Flavonoids	Isoflavones	--
Kaempferol-7-O-rhamnoside	432.106	C21H20O10	0.235077	-2.0888	Flavonoids	Flavonols	--
Apigenin-7-O-glucoside(Cosmosiin)	432.106	C21H20O10	0.991652	-0.012094	Flavonoids	Flavonoid	ko00944
Apigenin-8-C-Glucoside (Vitexin)	432.106	C21H20O10	0.513118	-0.962636	Flavonoids	Flavonoid	ko00941,ko00944
Isovitexin	432.106	C21H20O10	0.436852	-1.19479	Flavonoids	Flavonoid	--
Apigenin-6-C-glucoside (Isovitexin)	432.106	C21H20O10	0.386479	-1.37154	Flavonoids	Flavonoid carbonoside	ko00944
Kaempferol-3-O-rhamnoside (Afzelin)(Kaempferin)	432.106	C21H20O10	0.888562	-0.170456	Flavonoids	Flavonols	ko00944
Genistein-7-O-Glucoside (Genistin)	432.106	C21H20O10	0.000273706	-11.8351	Flavonoids	Isoflavones	ko00943
Apigenin-5-O-glucoside	432.106	C21H20O10	0.448003	-1.15842	Flavonoids	Flavonoid	--
Galangin-7-O-glucoside	432.106	C21H20O10	1.05295	0.0744367	Flavonoids	Flavonoid	--
Genistein-7-O-galactoside	432.106	C21H20O10	0.99278	-0.0104544	Flavonoids	Isoflavones	--
Avicularin(Quercetin-3-O-α-L-arabinofuranoside)	434.085	C20H18O11	0.839184	-0.252942	Flavonoids	Flavonols	--
Morin-3-O-xyloside	434.085	C20H18O11	0.87569	-0.191508	Flavonoids	Flavonols	--
Morin-3-O-arabinoside	434.085	C20H18O11	0.969135	-0.04523	Flavonoids	Flavonols	--
Morin-3-O-lyxoside	434.085	C20H18O11	1.02639	0.0375826	Flavonoids	Flavonols	--
Quercetin-3-O-xyloside (Reynoutrin)	434.085	C20H18O11	0.855931	-0.224434	Flavonoids	Flavonols	--
Isohemiphloin	434.121	C21H22O10	0.386163	-1.37272	Flavonoids	Flavonoid carbonoside	--
Naringenin-7-O-glucoside (Prunin)	434.121	C21H22O10	0.265214	-1.91477	Flavonoids	Dihydroflavone	ko00941
Butin-7-O-glucoside	434.121	C21H22O10	0.417629	-1.25971	Flavonoids	Flavonoid	--
Naringenin-4'-O-glucoside	434.121	C21H22O10	0.38113	-1.39164	Flavonoids	Flavonoid	--
Dihydrocharcone-4'-O-glucoside	436.136	C21H24O10	1.60627	0.683715	Flavonoids	Chalcones	--
Phloretin-2'-O-glucoside (Phlorizin)	436.137	C21H24O10	0.414792	-1.26954	Flavonoids	Chalcones	ko00941,ko01110
Phloretin-4'-O-glucoside (Trilobatin)	436.137	C21H24O10	0.105188	-3.24896	Flavonoids	Chalcones	--
Catechin gallate*	442.09	C22H18O10	0.563122	-0.828481	Flavonoids	Flavanols	--
Calycosin-7-O-beta-D-glucoside	446.121	C22H22O10	0.22972	-2.12205	Flavonoids	Other Flavonoids	--
Isorhamnetin-3-O-arabinoside	448.1	C21H20O11	0.87701	-0.189335	Flavonoids	Flavonols	--
Kaempferol-4'-O-glucoside	448.101	C21H20O11	1.17001	0.226518	Flavonoids	Flavonoid	--
Luteolin-7-O-glucoside (Cynaroside)	448.101	C21H20O11	1.46012	0.546087	Flavonoids	Flavonoid	ko00944
Kaempferol-3-O-glucoside (Astragalin)	448.101	C21H20O11	1.00271	0.00390108	Flavonoids	Flavonoid	ko00944,ko01110
Luteolin-6-C-glucoside (Isoorientin)	448.101	C21H20O11	0.133437	-2.90576	Flavonoids	Flavonoid carbonoside	--
Luteolin-8-C-glucoside (Orientin)	448.101	C21H20O11	0.344943	-1.53557	Flavonoids	Flavonoid carbonoside	--
Kaempferol-3-O-galactoside (Trifolin)	448.101	C21H20O11	0.851104	-0.232593	Flavonoids	Flavonols	ko00944
Kaempferol-7-O-glucoside	448.101	C21H20O11	0.729325	-0.455366	Flavonoids	Flavonols	--
Quercetin-3-O-rhamnoside(Quercitrin)	448.101	C21H20O11	0.557419	-0.843166	Flavonoids	Flavonols	ko00944
Luteolin-3'-O-glucoside	448.101	C21H20O11	0.928159	-0.107557	Flavonoids	Flavonoid	--
Luteolin-4'-O-glucoside	448.101	C21H20O11	1.13375	0.1811	Flavonoids	Flavonoid	--
Myricetin-3-O-arabinoside	450.08	C20H18O12	0.939028	-0.0907598	Flavonoids	Flavonols	--
eriodictyol 7-O-β-D-glucopyranoside	450.116	C21H22O11	1.16756	0.223495	Flavonoids	Dihydroflavone	--
Taxifolin-3-O-rhamnoside (Astilbin)	450.116	C21H22O11	0.000184685	-12.4026	Flavonoids	Dihydroflavonol	--
Eriodictyol-7-O-glucoside	450.116	C21H22O11	1.2648	0.338914	Flavonoids	Dihydroflavone	--
Aromadendrin-7-O-glucoside	450.116	C21H22O11	0.189625	-2.39878	Flavonoids	Flavonoid	--
3',5,5',7-Tetrahydroxyflavanone-7-O-glucoside	450.116	C21H22O11	0.511268	-0.967847	Flavonoids	Dihydroflavone	--
Dihydrokaempferol-7-O-glucoside	450.116	C21H22O11	1.39608	0.481381	Flavonoids	Flavonols	--
Eriodictyol-3'-O-glucoside	450.116	C21H22O11	0.930056	-0.104611	Flavonoids	Dihydroflavone	--
3-Hydroxyphloretin-4'-O-glucoside	452.132	C21H24O11	0.102329	-3.28872	Flavonoids	Chalcones	--
Gallocatechin 3-O-gallate	458.085	C22H18O11	0.560331	-0.835648	Flavonoids	Flavanols	--
Epigallocatechin-3-gallate	458.085	C22H18O11	0.518036	-0.948876	Flavonoids	Flavanols	--
Tetahydroxyflavone-7-O-glucuronide	462.08	C21H18O12	1.2588	0.332045	Flavonoids	Flavonoid	--
Kaempferol-3-O-glucuronide	462.08	C21H18O12	1.16309	0.217965	Flavonoids	Flavonols	--
Diosmetin-7-O-galactoside*	462.116	C22H22O11	1.87789	0.909114	Flavonoids	Flavonoid	--
Diosmetin-6-C-glucoside	462.116	C22H22O11	0.34669	-1.52828	Flavonoids	Flavonoid	--
Chrysoeriol-7-O-glucoside*	462.116	C22H22O11	0.925232	-0.112113	Flavonoids	Flavonoid	--
Chrysoeriol-5-O-glucoside	462.116	C22H22O11	1.59505	0.6736	Flavonoids	Flavonoid	--
Hispidulin-8-C-glucoside*	462.116	C22H22O11	0.319744	-1.64501	Flavonoids	Flavonoid carbonoside	--
6-C-MethylKaempferol-3-glucoside	462.116	C22H22O11	1.78059	0.832353	Flavonoids	Flavonoid	--
Diosmetin-7-O-Beta-D-Glucopyranoside	462.116	C22H22O11	1.79869	0.846945	Flavonoids	Flavonoid	--
Isorhamnetin-3-O-rhamnoside	462.116	C22H22O11	0.569331	-0.81266	Flavonoids	Flavonols	--
Chrysoeriol-8-C-glucoside (Scoparin)*	462.116	C22H22O11	0.320237	-1.64279	Flavonoids	Flavonoid	--
Hispidulin-7-O-Glucoside*	462.118	C22H22O11	1.56485	0.646022	Flavonoids	Flavonoid	--
Quercetin-5-O-β-D-glucoside	464.095	C21H20O12	1.31859	0.399	Flavonoids	Flavonoid	--
6-Hydroxykaempferol-7-O-glucoside	464.095	C21H20O12	1.21151	0.276805	Flavonoids	Flavonols	--
Isoquercitrin	464.095	C21H20O12	1.25011	0.322059	Flavonoids	Flavonoid	--
Quercetin-7-O-glucoside*	464.095	C21H20O12	0.611788	-0.708897	Flavonoids	Flavonols	--
Quercetin-4'-O-glucoside (Spiraeoside)	464.095	C21H20O12	0.960378	-0.0583255	Flavonoids	Flavonols	--
Quercetin-3-O-glucoside (Isoquercitrin)*	464.095	C21H20O12	0.496808	-1.00924	Flavonoids	Flavonols	ko00944,ko01100,ko01110
Quercetin-3-O-galactoside (Hyperin)	464.095	C21H20O12	0.942077	-0.0860839	Flavonoids	Flavonols	--
Isohyperoside	464.095	C21H20O12	1.37691	0.461435	Flavonoids	Flavonols	--
6-Hydroxyluteolin 5-glucoside	464.095	C21H20O12	1.13849	0.187128	Flavonoids	Flavonoid	--
Hesperetin-7-O-glucoside	464.131	C22H24O11	0.689158	-0.537094	Flavonoids	Flavonoid	ko00941
Hesperetin-5-O-glucoside	464.132	C22H24O11	1.05105	0.0718292	Flavonoids	Dihydroflavonol	--
Taxifolin-3'-O-glucoside	466.111	C21H22O12	1.22847	0.296857	Flavonoids	Flavonoid	--
Isorhamnetin-3-O-gallate	468.113	C23H16O11	0.131344	-2.92858	Flavonoids	Flavonols	--
Kaempferide-3-O-glucuronide	476.095	C22H20O12	0.164719	-2.60192	Flavonoids	Flavonols	--
Tricin-4'-methylether-3'-O-glucoside	478.111	C22H22O12	0.711366	-0.491336	Flavonoids	Flavonols	--
6-Methoxykaempferol-3-O-glucoside	478.111	C22H22O12	0.385403	-1.37556	Flavonoids	Flavonoid	--
Isorhamnetin-3-O-Glucoside*	478.111	C22H22O12	0.685805	-0.544129	Flavonoids	Flavonols	--
Rhamnetin-3-O-Glucoside	478.111	C22H22O12	0.744968	-0.424749	Flavonoids	Flavonols	--
Isorhamnetin-7-O-glucoside (Brassicin)*	478.111	C22H22O12	0.68502	-0.545782	Flavonoids	Flavonols	--
Nepetin-7-O-alloside	478.112	C22H22O12	0.725134	-0.46368	Flavonoids	Flavonoid	--
Nepetin-7-O-glucoside	478.112	C22H22O12	0.418323	-1.25731	Flavonoids	Flavonoid	--
Persicoside	478.148	C23H26O11	0.810843	-0.302505	Flavonoids	Dihydroflavone	--
Dihydromyricetin-3-O-glucoside	482.105	C21H22O13	1.01503	0.0215228	Flavonoids	Dihydroflavonol	--
Kaempferol-3-O-(2''-acetyl)glucoside	490.111	C23H22O12	0.0760123	-3.71762	Flavonoids	Flavonols	--
Tricin-5-O-Glucoside	492.127	C23H24O12	1.11811	0.161066	Flavonoids	Flavonoid	--
Tricin-7-O-Glucoside	492.127	C23H24O12	1.26576	0.339999	Flavonoids	Flavonoid	--
5,7,4'-Trihydroxy-6,8-dimethoxyisoflavone-7-O-galactoside	492.127	C23H24O12	1.30279	0.381601	Flavonoids	Isoflavones	--
4',5'-Dihydroxy-6,8-dimethoxyisoflavone-7-O-galactoside	492.127	C23H24O12	1.22937	0.297919	Flavonoids	Isoflavones	--
Jaceosidin-7-O-Glucoside	492.128	C23H24O12	1.2343	0.303692	Flavonoids	Flavonoid	--
Mearnsetin-3-O-glucoside	494.106	C22H22O13	0.368853	-1.43888	Flavonoids	Flavonoid	--
Kaempferol-3-O-(2''-O-acetyl)glucuronide	504.09	C23H20O13	0.74334	-0.427905	Flavonoids	Flavonols	--
Chrysoeriol-7-O-(6''-acetyl)glucoside	504.127	C24H24O12	1.07902	0.109715	Flavonoids	Flavonoid	--
Quercetin-3-O-(6''-acetyl)galactoside	506.107	C23H22O13	1.11865	0.161763	Flavonoids	Flavonols	--
Eupatilin-7-O-glucoside	506.142	C24H26O12	0.84239	-0.247441	Flavonoids	Flavonoid	--
Quercetin-3-O-(2''-acetyl)glucuronide	520.085	C23H20O14	0.161649	-2.62906	Flavonoids	Flavonols	--
Isorhamnetin-3-O-(6''-acetylglucoside)	520.122	C24H24O13	0.474165	-1.07654	Flavonoids	Flavonols	--
Tricin-7-O-guaiacylglycerol	526.148	C27H26O11	0.483314	-1.04897	Flavonoids	Flavonoid	--
Kaempferol-3-O-(6''-malonyl)glucoside	534.101	C24H22O14	0.367345	-1.44479	Flavonoids	Flavonols	--
Apigenin-6-C-xyloside-8-C-arabinoside*	534.137	C25H26O13	0.210515	-2.248	Flavonoids	Flavonoid carbonoside	--
Apigenin-6,8-di-C-arabinoside*	534.137	C25H26O13	0.30446	-1.71568	Flavonoids	Flavonoid carbonoside	--
Apigenin-6-C-arabinoside-8-C-xyloside*	534.137	C25H26O13	0.236729	-2.07869	Flavonoids	Flavonoid carbonoside	--
Chrysoeriol-7-O-(6''-malonyl)glucoside	548.117	C25H24O14	1.57425	0.654667	Flavonoids	Flavonoid	--
Quercetin-7-O-(6''-malonyl)glucoside	550.096	C24H22O15	0.745856	-0.423031	Flavonoids	Flavonols	--
Quercetin-3-O-(6''-malonyl)glucoside	550.096	C24H22O15	0.259058	-1.94866	Flavonoids	Flavonols	ko00944
Quercetin-3-O-(6''-malonyl)galactoside	550.096	C24H22O15	0.987503	-0.0181432	Flavonoids	Flavonols	--
Hesperetin-7-O-(6''-malonyl)glucoside	550.132	C25H26O14	1.21375	0.279468	Flavonoids	Dihydroflavonol	--
Luteolin-6,8-di-C-arabinoside	550.132	C25H26O14	0.122192	-3.03277	Flavonoids	Flavonoid carbonoside	--
Isorhamnetin-3-O-(6''-malonylglucoside)	564.088	C25H24O15	0.385128	-1.37659	Flavonoids	Flavonoid	--
Schaftoside	564.123	C26H28O14	0.756972	-0.401689	Flavonoids	Flavonoid carbonoside	--
Isoschaftoside	564.123	C26H28O14	0.63214	-0.661685	Flavonoids	Flavonoid carbonoside	--
Apigenin-8-C-(2''-glucosyl)arabinoside	564.148	C26H28O14	1.22291	0.290319	Flavonoids	Flavonoid carbonoside	--
Apigenin-6-C-(2''-glucosyl)arabinoside	564.148	C26H28O14	0.569077	-0.813304	Flavonoids	Flavonoid carbonoside	--
Tricin-7-O-(6''-O-malonyl)glucoside	578.127	C26H26O15	0.733048	-0.44802	Flavonoids	Flavonoid	--
Tricin-7-O-(6''-Malonyl)Glucoside	578.127	C26H26O15	1.96074	0.971401	Flavonoids	Flavonoid	--
Apigenin-7-O-neohesperidoside (Rhoifolin)	578.164	C27H30O14	0.785055	-0.349134	Flavonoids	Flavonoid	ko00944
Apigenin-6-C-(2''-rhamnosyl)glucoside	578.164	C27H30O14	1.72255e-05	-15.8251	Flavonoids	Flavonoid carbonoside	--
Orientin-7-O-arabinoside	580.143	C26H28O15	0.639387	-0.645238	Flavonoids	Flavonoid carbonoside	--
Orientin-6-C-arabinoside	580.143	C26H28O15	0.836417	-0.257707	Flavonoids	Flavonoid carbonoside	--
Naringenin-7-O-Rutinoside(Narirutin)*	580.179	C27H32O14	0.339259	-1.55954	Flavonoids	Dihydroflavone	--
Naringenin-7-O-Neohesperidoside(Naringin)*	580.179	C27H32O14	0.334033	-1.58194	Flavonoids	Dihydroflavone	ko00941
Vanillyl-O-Vitexin	582.137	C29H26O13	0.815404	-0.294413	Flavonoids	Flavonoid	--
Luteolin-6-C-(5''-glucuronyl)xyloside	594.122	C26H26O16	0.458357	-1.12546	Flavonoids	Flavonoid	--
Kaempferol-3-O-(6''-p-Coumaroyl)glucoside (Tiliroside)	594.137	C30H26O13	0.538302	-0.893514	Flavonoids	Flavonols	--
Vitexin-2''-O-glucoside	594.158	C27H30O15	1.21808	0.284615	Flavonoids	Flavonoid carbonoside	ko00944
Luteolin-7-O-rutinoside*	594.158	C27H30O15	1.17323	0.230484	Flavonoids	Flavonoid	--
Isovitexin-7-O-glucoside(Saponarin)	594.158	C27H30O15	1.17939	0.238037	Flavonoids	Flavonoid carbonoside	--
Kaempferol-3-O-robinobioside(Biorobin)	594.158	C27H30O15	1.01637	0.0234308	Flavonoids	Flavonols	--
Kaempferol-3-O-glucorhamnoside	594.158	C27H30O15	1.21216	0.277577	Flavonoids	Flavonoid carbonoside	--
Luteolin-7-O-neohesperidoside (Lonicerin)	594.158	C27H30O15	1.16301	0.217865	Flavonoids	Flavonoid	ko00944
Kaempferol-3-O-neohesperidoside	594.158	C27H30O15	1.04397	0.0620798	Flavonoids	Flavonoid	--
Apigenin-6,8-di-C-glucoside (Vicenin-2)	594.158	C27H30O15	1.14666	0.197439	Flavonoids	Flavonoid	--
Kaempferol-3-O-glucoside-7-O-rhamnoside	594.158	C27H30O15	1.13648	0.184567	Flavonoids	Flavonols	--
Kaempferol-3-O-rutinoside(Nicotiflorin)*	594.158	C27H30O15	1.1556	0.208642	Flavonoids	Flavonoid	ko00944,ko01110
Luteolin-6,8-di-C-glucoside*	610.153	C27H30O16	0.816894	-0.291778	Flavonoids	Flavonoid carbonoside	--
Quercetin-3-O-robinobioside	610.153	C27H30O16	0.820423	-0.285561	Flavonoids	Flavonols	--
Quercetin-7-O-rutinoside	610.153	C27H30O16	0.94291	-0.0848078	Flavonoids	Flavonols	--
Orientin-7-O-glucoside	610.153	C27H30O16	0.876704	-0.189838	Flavonoids	Flavonoid carbonoside	--
Isoorientin-7-O-glucoside	610.153	C27H30O16	0.586422	-0.769989	Flavonoids	Flavonoid carbonoside	--
Quercetin-3-O-rutinoside (Rutin)	610.153	C27H30O16	0.9444	-0.0825304	Flavonoids	Flavonols	ko00944,ko01100,ko01110
Quercetin-3-O-glucoside-7-O-rhamnoside	610.153	C27H30O16	0.929775	-0.105046	Flavonoids	Flavonols	--
Quercetin-3-O-(4''-O-glucosyl)rhamnoside	610.153	C27H30O16	0.951261	-0.0720863	Flavonoids	Flavonols	--
Quercetin-3-O-neohesperidoside	610.153	C27H30O16	1.11149	0.152494	Flavonoids	Flavonols	--
Quercetin-3-O-(2''-O-rhamnosyl)galactoside	610.153	C27H30O16	0.254643	-1.97345	Flavonoids	Flavonols	--
Kaempferol-6,8-di-C-glucoside*	610.154	C27H30O16	0.85088	-0.232972	Flavonoids	Flavonoid	--
Hesperetin-7-O-neohesperidoside(Neohesperidin)*	610.19	C28H34O15	1.47797	0.563614	Flavonoids	Dihydroflavone	ko00941
Hesperetin-7-O-rutinoside (Hesperidin)*	610.19	C28H34O15	1.55309	0.635145	Flavonoids	Dihydroflavone	--
Luteolin-6-C-(2''-glucuronyl)glucoside	624.133	C27H28O17	0.721092	-0.471744	Flavonoids	Flavonoid	--
Isorhamnetin-3-O-rutinoside (Narcissin)	624.162	C28H32O16	0.34173	-1.54907	Flavonoids	Flavonoid	--
Tamarixetin-3-O-rutinoside	624.168	C28H32O16	0.388129	-1.36539	Flavonoids	Flavonoid	--
Rhamnetin-3-O-Rutinoside	624.168	C28H32O16	0.314769	-1.66764	Flavonoids	Flavonoid	--
Chrysoeriol-6,8-di-C-glucoside	624.169	C28H32O16	0.662418	-0.594187	Flavonoids	Flavonoid carbonoside	--
Chrysoeriol-6-C-glucoside-7-O-glucoside	624.169	C28H32O16	0.658435	-0.602887	Flavonoids	Flavonoid carbonoside	--
Chrysoeriol-7,4'-di-O-glucoside	624.169	C28H32O16	0.350228	-1.51364	Flavonoids	Flavonoid	--
Isorhamnetin-3-O-neohespeidoside	624.169	C28H32O16	0.302605	-1.72449	Flavonoids	Flavonoid	--
Tamarixetin-3-O-glucoside-7-O-rhamnoside	624.169	C28H32O16	0.316742	-1.65862	Flavonoids	Flavonoid	--
Isorhamnetin-3-O-glucoside-7-O-rhamnoside	624.169	C28H32O16	0.80494	-0.313047	Flavonoids	Flavonols	--
6-C-Methylquercetin-3-O-rutinoside	624.169	C28H32O16	0.32578	-1.61803	Flavonoids	Flavonols	--
Sexangularetin-3-O-glucoside-7-O-rhamnoside	624.169	C28H32O16	0.314755	-1.6677	Flavonoids	Flavonols	--
2'-Hydoxy,5-methoxyGenistein-O-rhamnosyl-glucoside	624.169	C28H32O16	0.309476	-1.6921	Flavonoids	Isoflavones	--
6-Hydroxykaempferol 3,6-Diglucoside	626.148	C27H30O17	0.339683	-1.55774	Flavonoids	Flavonoid	--
6-Hydroxykaempferol 6,7-Diglucoside	626.148	C27H30O17	0.277549	-1.84919	Flavonoids	Flavonoid	--
Myricetin-3-O-galactoside-3'-O-rhamnoside*	626.148	C27H30O17	1.06973	0.0972435	Flavonoids	Flavonoid	--
Quercetin3,7-diglucoside	626.148	C27H30O17	0.658119	-0.603579	Flavonoids	Flavonoid	--
6-Hydroxykaempferol-7,6-O-Diglucoside	626.148	C27H30O17	0.956406	-0.0643051	Flavonoids	Flavonols	--
6-Hydroxykaempferol-3,6-O-Diglucoside	626.148	C27H30O17	0.768026	-0.380772	Flavonoids	Flavonols	--
Myricetin-3-O-rutinoside*	626.148	C27H30O17	1.08511	0.117841	Flavonoids	Flavonols	--
Meratin	626.148	C27H30O17	1.19476	0.256722	Flavonoids	Flavonoid	--
Hesperetin-6-C-glucoside-7-O-glucoside	626.185	C28H34O16	0.569551	-0.812103	Flavonoids	Flavonoid carbonoside	--
Hesperetin-8-C-glucoside-3'-O-glucoside	626.185	C28H34O16	1.09256	0.127715	Flavonoids	Flavonoid carbonoside	--
Tricin-7-O-neohesperidoside	638.185	C29H34O16	1.37588	0.460357	Flavonoids	Flavonoid	--
Isorhamnetin-3,7-O-diglucoside	640.163	C28H32O17	0.92057	-0.1194	Flavonoids	Flavonols	--
Isorhamnetin-3-O-sophoroside	640.164	C28H32O17	1.11998	0.16347	Flavonoids	Flavonols	--
2'-Hydoxy,5-methoxyGenistein-4',7-O-diglucoside	640.164	C28H32O17	0.505067	-0.985454	Flavonoids	Isoflavones	--
Luteolin-7-O-(6''-sinapoyl)glucoside	654.158	C32H30O15	1.4235	0.509444	Flavonoids	Flavonoid	--
Tricin-5,7-O-diglucoside	654.18	C29H34O17	1.29651	0.374632	Flavonoids	Flavonoid	--
Tricin-4'-O-glucoside-7-O-glucoside	654.18	C29H34O17	0.00123026	-9.66682	Flavonoids	Flavonoid	--
Tricin-7-O-(2''-O-glucosyl)glucoside	654.18	C29H34O17	0.742061	-0.430391	Flavonoids	Flavonoid	--
Syringetin-3-O-rutinoside	654.18	C29H34O17	0.907043	-0.140757	Flavonoids	Flavonoid	--
Cirsiliol-8-C-(2''-glucosyl)glucoside	654.18	C29H34O17	1.14863	0.199915	Flavonoids	Flavonoid carbonoside	--
5,7,4'-Trihydroxy-6,8-dimethoxyisoflavone-7-O-galactoside-rhamnose	654.18	C29H34O17	0.718659	-0.47662	Flavonoids	Isoflavones	--
Chrysoeriol-7-O-(6''-sinapoyl)glucoside	668.174	C33H32O15	0.0754613	-3.72812	Flavonoids	Flavonoid	--
Tricin-4'-O-(guaiacylglycerol)ether-7-O-glucoside	688.2	C33H36O16	0.875317	-0.192123	Flavonoids	Flavonoid	--
Kaempferol-3-O-(6''-Malonyl)glucoside-7-O-Glucoside	696.153	C30H32O19	1.0653	0.0912619	Flavonoids	Flavonols	--
Tricin-7-O-(2''-Sinapoyl)glucoside	698.185	C34H34O16	1.5078	0.592448	Flavonoids	Flavonoid	--
Isovitexin-2''-O-(6'''-p-coumaroyl)glucoside	740.195	C36H36O17	0.0455709	-4.45574	Flavonoids	Flavonoid	--
Vitexin-7-O-(6''-p-coumaroyl)glucoside	740.195	C36H36O17	0.0427674	-4.54734	Flavonoids	Flavonoid carbonoside	--
Vitexin-7-O-rutinoside	740.216	C33H40O19	0.152339	-2.71464	Flavonoids	Flavonoid	--
Isoorientin-7-O-(6''-p-coumaroyl)glucoside	756.19	C36H36O18	3.07956e-05	-14.9869	Flavonoids	Flavonoid carbonoside	--
Luteolin-7-O-glucoside-5-O-(6''-feruloyl)arabinoside	756.19	C36H36O18	0.000346972	-11.4929	Flavonoids	Flavonoid	--
quercetin 3-O-α-rhamnopyranosyl (1→2)-[α-rhamnopyranosyl (1→6)]-β-glucopyranoside	756.211	C33H40O20	0.0891862	-3.48704	Flavonoids	Flavonoid	--
kaempferol 3-O-β-glucopyranosyl (1 → 2)-β-galactopyranoside 7-O-α-rhamnopyranoside	756.211	C33H40O20	1.63171	0.706387	Flavonoids	Flavonoid	--
Kaempferol-3-O-neohesperidoside-7-O-glucoside	756.211	C33H40O20	0.305482	-1.71084	Flavonoids	Flavonols	--
Quercetin-3-O-rutinoside-7-O-rhamnoside	756.211	C33H40O20	0.764721	-0.386995	Flavonoids	Flavonols	--
Kaempferol-3-O-sophoroside-7-O-rhamnoside	756.211	C33H40O20	0.352514	-1.50425	Flavonoids	Flavonols	--
Quercetin-3-O-(2''-O-Rhamnosyl)rutinoside	756.212	C33H40O20	0.0382007	-4.71026	Flavonoids	Flavonols	--
Vitexin-7-O-(6''-feruloyl)glucoside	770.206	C37H38O18	0.0242578	-5.36541	Flavonoids	Flavonoid carbonoside	--
kaempferol-3-caffeoyldiglucoside	772.185	C36H36O19	0.296729	-1.75278	Flavonoids	Flavonoid	--
6-Hydroxykaempferol 3-Rutinoside-6-glucoside	772.206	C33H40O21	0.994446	-0.00803464	Flavonoids	Flavonoid	--
6-Hydroxykaempferol-3-O-rutin-6-O-glucoside	772.206	C33H40O21	0.485352	-1.0429	Flavonoids	Flavonols	--
Quercetin-3-O-sophoroside-7-O-rhamnoside	772.206	C33H40O21	0.984328	-0.0227894	Flavonoids	Flavonols	--
Gossypetin-3-O-rutinoside-8-O-rhamnoside	772.206	C33H40O21	0.41356	-1.27383	Flavonoids	Flavonols	--
Quercetin-3-O-rutinoside-7-O-glucoside	772.206	C33H40O21	0.372963	-1.4229	Flavonoids	Flavonols	--
Isorhamnetin-3-O-rutinoside-4'-O-glucoside	786.221	C34H42O21	1.5876	0.666847	Flavonoids	Flavonols	--
Isorhamnetin-3-O-sophoroside-7-O-rhamnoside	786.222	C34H42O21	0.48602	-1.04091	Flavonoids	Flavonols	--
Apigenin-8-C-glucoside-7-O-(6''-sinapoyl)glucoside	800.216	C38H40O19	0.0268148	-5.22083	Flavonoids	Flavonoid carbonoside	--
Chrysoeriol-8-C-glucoside-7-O-(6''-feruloyl)glucoside	800.216	C38H40O19	0.0254057	-5.2987	Flavonoids	Flavonoid carbonoside	--
Isovitexin-7-O-(6''-sinapoyl)glucoside	800.216	C38H40O19	0.0516158	-4.27604	Flavonoids	Flavonoid carbonoside	--
Quercetin-3-O-(2''-O-rhamnosyl)rutinoside-7-O-glucoside	918.264	C39H50O25	0.926024	-0.110878	Flavonoids	Flavonols	--
Quercetin-3-O-(6''-feruloyl)glucoside-7-O-rutinoside	948.254	C43H48O24	0.334768	-1.57877	Flavonoids	Flavonols	--
bromo-Cyclopentane	147.989	C5H9Br	1.00232	0.00333754	Halogenated hydrocarbons	-	--
Phosphoric acid, 2-chloroethenyl dimethyl ester	185.985	C4H8ClO4P	0.950385	-0.0734155	Halogenated hydrocarbons	-	--
Butane, 1,1'-oxybis[4-chloro-	198.058	C8H16Cl2O	0.961666	-0.0563921	Halogenated hydrocarbons	-	--
1H-Pyrazole, 1-[2-(4-fluorophenoxy)ethyl]-3,5-dimethyl-	234.117	C13H15FN2O	0.499014	-1.00285	Halogenated hydrocarbons	-	--
2,6-diethyl-Pyrazine	136.1	C8H12N2	9990.35	13.2863	Heterocyclic compound	-	--
Benzo[b]thiophene, 2-ethyl-	162.05	C10H10S	3.15007	1.65538	Heterocyclic compound	-	--
3,6-Dimethyl-4H-furo[3,2-c]pyran-4-one	164.047	C9H8O3	3.90707	1.96609	Heterocyclic Compound	-	--
4,8,12-Tetradecatrienal, 5,9,13-trimethyl-	248.214	C17H28O	2.33693	1.22461	Heterocyclic compound	-	--
1,4-Dihydro-4-oxopyridazine	96.032	C4H4N2O	0.956594	-0.0640209	Heterocyclic compound	-	--
6-methyl-2(1H)-Pyridone	109.053	C6H7NO	1.02026	0.0289391	Heterocyclic compound	-	--
6-methyl-3(2H)-Pyridazinone	110.048	C5H6N2O	0.975309	-0.0360694	Heterocyclic compound	-	--
1,2,4-Triazolo[4,3-b]pyridazin-6(5H)-one	136.039	C5H4N4O	0.877199	-0.189024	Heterocyclic compound	-	--
3-Acetyl-2,5-dimethyl furan	138.068	C8H10O2	0.834882	-0.260356	Heterocyclic compound	-	--
3-Amino-4,6-dimethylpyridone-2(1H)	138.079	C7H10N2O	0.88673	-0.173434	Heterocyclic compound	-	--
6-methyl-7-Oxa-8-azabicyclo[4.2.1]non-8-ene	139.1	C8H13NO	0.951502	-0.0717212	Heterocyclic compound	-	--
Ketone, methyl 2-methyl-1,3-oxothiolan-2-yl	146.04	C6H10O2S	1.00411	0.00592181	Heterocyclic compound	-	--
1-(2-furanylmethyl)-1H-Pyrrole	147.068	C9H9NO	1.16946	0.225841	Heterocyclic compound	-	--
3-Methylbenzothiophene	148.035	C9H8S	1.96351	0.973436	Heterocyclic compound	-	--
Benzene, (isothiocyanatomethyl)-	149.03	C8H7NS	0.893483	-0.162487	Heterocyclic compound	-	--
Pyrimidine, 4-butyl-3,4-dihydro-5-methyl-	152.131	C9H16N2	1.93291	0.950778	Heterocyclic compound	-	--
3,4-diethyl-1H-Pyrrole-2,5-dione	153.079	C8H11NO2	0.927151	-0.109124	Heterocyclic compound	-	--
2-Propanamine, 2-methyl-N2-[1-tetrahydro-1H-1-pyrrolylmethylidene]	154.147	C9H18N2	0.932724	-0.100478	Heterocyclic compound	-	--
(5R,8aR)-5-Propyloctahydroindolizine	167.167	C11H21N	0.962637	-0.0549359	Heterocyclic compound	-	--
trans-Linalool oxide (furanoid)	170.131	C10H18O2	1.01372	0.0196534	Heterocyclic compound	-	--
1,4,5,7-Tetramethyl-furo[3,4-d]pyridazine	176.095	C10H12N2O	0.891237	-0.166119	Heterocyclic compound	-	--
7-ethyl-2-methyl-4-benzoxazolol	177.079	C10H11NO2	0.960758	-0.0577554	Heterocyclic compound	-	--
2,2'-Ethylidenebis(5-methylfuran)	190.099	C12H14O2	1.48749	0.572881	Heterocyclic compound	-	--
3-Pentyl-4,5,6,7-tetrahydro-1H-indazole	192.163	C12H20N2	1.07297	0.101607	Heterocyclic compound	-	--
2,2'-Isopropylidenebis(5-methylfuran)	204.115	C13H16O2	1.83546	0.876145	Heterocyclic compound	-	--
Pentobarbital	226.132	C11H18N2O3	0.763981	-0.38839	Heterocyclic compound	-	--
1,1'-(6-methoxy-2,5-benzofurandiyl)bis-Ethanone	232.074	C13H12O4	1.55397	0.635959	Heterocyclic compound	-	--
N-(2,6-Dimethylphenyl)-N-[(2E)-3-methyl-1,3-thiazinan-2-ylidene]amine	234.119	C13H18N2S	1.00585	0.00840874	Heterocyclic compound	-	--
Ethyl 2-(5-methyl-5-vinyltetrahydrofuran-2-yl)propan-2-yl carbonate	242.152	C13H22O4	1.01124	0.0161217	Heterocyclic compound	-	--
Cobalt, bis(.eta.-5-piperidinylcyclopentadienyl)-	355.158	C20H28CoN2	1.1771	0.235238	Heterocyclic compound	-	--
3,3,6-trimethyl-1,5-Heptadiene	138.141	C10H18	2.39912	1.26251	Hydrocarbons	-	--
1,5,5-Trimethyl-6-(3-methyl-buta-1,3-dienyl)-cyclohexene	190.172	C14H22	11.5596	3.53102	Hydrocarbons	-	--
2,6,10,10-tetramethyl-1-Oxaspiro[4.5]deca-3,6-diene	192.151	C13H20O	8.58289	3.10146	Hydrocarbons	-	--
1,3-Dimethyl-5-n-hexyladamantane	248.25	C18H32	3.30492	1.72461	Hydrocarbons	-	--
3,5,5-trimethyl-2-Hexene	126.141	C9H18	0.880933	-0.182895	Hydrocarbons	-	--
4-Undecene, 3-methyl-, (Z)-	168.188	C12H24	1.34638	0.429083	Hydrocarbons	-	--
6-methyl-Dodecane	184.219	C13H28	0.981925	-0.0263151	Hydrocarbons	-	--
2,3,5,5,8,8-hexamethyl-Cycloocta-1,3,6-triene	190.172	C14H22	1.52762	0.611287	Hydrocarbons	-	--
Dodecane, 4,6-dimethyl-	198.235	C14H30	0.885995	-0.17463	Hydrocarbons	-	--
Tetradecane	198.235	C14H30	1.01542	0.0220777	Hydrocarbons	-	--
Pentadecane	212.25	C15H32	1.09814	0.135061	Hydrocarbons	-	--
decyl-Cyclohexane	224.25	C16H32	0.921599	-0.117789	Hydrocarbons	-	--
Hexadecane	226.266	C16H34	1.04386	0.0619272	Hydrocarbons	-	--
Heptadecane	240.282	C17H36	0.820737	-0.285008	Hydrocarbons	-	--
Heptadecane, 2-methyl-	254.297	C18H38	1.00272	0.00391499	Hydrocarbons	-	--
Hexadecane, 2,6,11,15-tetramethyl-	282.329	C20H42	1.66937	0.7393	Hydrocarbons	-	--
2,6,6-Trimethyl-2-cyclohexene-1,4-dione	152.084	C9H12O2	2.29442	1.19813	Ketone	-	--
1,2-Propadiene-1,3-dione	67.99	C3O2	1.00092	0.00132356	Ketone	-	--
Isopropenyl ethyl ketone	98.073	C6H10O	0.546286	-0.872271	Ketone	-	--
5-Hepten-2-one, 6-methyl-	126.104	C8H14O	1.42542	0.511386	Ketone	-	--
2,5-Pyrrolidinedione, 1-ethyl-	127.063	C6H9NO2	0.993348	-0.00962921	Ketone	-	--
Acetophenone, 4'-hydroxy-	136.052	C8H8O2	1.45547	0.541481	Ketone	-	ko01100
1-(1-cyclohexen-1-yl)-1-Propanone	138.104	C9H14O	0.986679	-0.0193478	Ketone	-	--
Ethanone, 1-(2-hydroxy-5-methylphenyl)-	150.068	C9H10O2	0.698565	-0.517534	Ketone	-	--
3,7-Nonadien-2-one, 8-methyl-, (E)-	152.12	C10H16O	1.66147	0.732464	Ketone	-	--
3-Acetoxy-2-methyl-pyran-4-one	168.042	C8H8O4	1.16706	0.222876	Ketone	-	--
Benzophenone	182.073	C13H10O	0.963973	-0.0529348	Ketone	-	--
2-acetyl-1,3-Indandione	188.047	C11H8O3	1.88671	0.915871	Ketone	-	--
1-(4-tert-Butylphenyl)propan-2-one	190.136	C13H18O	0.768875	-0.379178	Ketone	-	--
4-acetyl-2,3,4,5,5-pentamethyl-2-Cyclopenten-1-one	194.131	C12H18O2	1.02231	0.0318351	Ketone	-	--
5,9-Undecadien-2-one, 6,10-dimethyl-, (Z)-	194.167	C13H22O	1.82694	0.869431	Ketone	-	--
2'-Hydroxy-4'-methoxyacetophenone, acetate	208.074	C11H12O4	1.89265	0.920405	Ketone	-	--
6-Methyl-6-(5-methylfuran-2-yl)heptan-2-one	208.146	C13H20O2	1.61645	0.692829	Ketone	-	--
5,9,13-Pentadecatrien-2-one, 6,10,14-trimethyl-, (E,E)-	262.23	C18H30O	1.98718	0.99072	Ketone	-	--
2-Pentadecanone, 6,10,14-trimethyl-	268.277	C18H36O	0.822239	-0.28237	Ketone	-	--
Coumarin	146.037	C9H6O2	0.00644591	-7.2774	Lignans and Coumarins	Coumarins	ko00940,ko01110
3,4-Dihydrocoumarin	148.052	C9H8O2	0.72074	-0.472448	Lignans and Coumarins	Coumarins	--
6-MethylCoumarin	160.052	C10H8O2	0.81201	-0.30043	Lignans and Coumarins	Coumarins	--
Esculetin	178.027	C9H6O4	0.000144835	-12.7533	Lignans and Coumarins	Coumarins	--
Ayapin	188.041	C11H8O3	0.676657	-0.563504	Lignans and Coumarins	Coumarins	--
Isoscopoletin (6-Hydroxy-7-Methoxycoumarin)	192.033	C10H8O4	1.30625	0.385426	Lignans and Coumarins	Coumarins	--
Scopoletin (7-Hydroxy-5-methoxycoumarin)	192.042	C10H8O4	1.3202	0.400759	Lignans and Coumarins	Coumarins	ko00940,ko01110
Isofraxidin	222.053	C11H10O5	1.89292	0.920611	Lignans and Coumarins	Coumarins	--
Sideretin (5,7,8-Trihydroxy-6-methoxycoumarin)	224.032	C10H8O6	1.45084	0.536886	Lignans and Coumarins	Coumarins	--
Tachioside	302.1	C13H18O8	0.637798	-0.648829	Lignans and Coumarins	Lignans	--
Fraxetin (7,8-Dihydroxy-6-methoxycoumarin)	208.037	C10H8O5	2.75869	1.46398	Lignans and Coumarins	Coumarins	--
Osthole	244.11	C15H16O3	3.71789	1.89448	Lignans and Coumarins	Coumarins	--
p-Coumaroyltyramine	283.121	C17H17NO3	6.65859	2.73522	Lignans and Coumarins	Coumarins	--
Pinoresinol*	358.142	C20H22O6	1269.05	10.3095	Lignans and Coumarins	Lignans	ko00998,ko01100,ko01110
Epipinoresinol*	358.142	C20H22O6	1585.48	10.6307	Lignans and Coumarins	Lignans	--
Syringaresinol	418.163	C22H26O8	16.2172	4.01945	Lignans and Coumarins	Lignans	--
Isolariciresinol-9-O-glucoside	522.21	C26H34O11	2.89445	1.53329	Lignans and Coumarins	Lignans	--
Olivil-4'-O-glucoside	538.205	C26H34O12	2.60354	1.38047	Lignans and Coumarins	Lignans	--
syringaresinol-4'-O-glucopyranosid	580.216	C28H36O13	3.14919	1.65498	Lignans and Coumarins	Lignans	--
Medioresinol-4'-O-(6'''-acetyl)glucoside	592.216	C29H36O13	3111.7	11.6035	Lignans and Coumarins	Lignans	--
Esculin (6,7-DihydroxyCoumarin-6-glucoside)	340.079	C15H16O9	1.64103	0.714605	Lignans and Coumarins	Coumarins	--
Esculetin-7-O-glucoside	340.079	C15H16O9	1.46247	0.54841	Lignans and Coumarins	Coumarins	--
Daphnin	340.079	C15H16O9	1.44956	0.535615	Lignans and Coumarins	Coumarins	--
Syringaresinol-4'-O-(6''-acetyl)glucoside	622.226	C30H38O14	3.48625	1.80168	Lignans and Coumarins	Lignans	--
Scopoletin-7-O-glucoside (Scopolin)	354.095	C16H18O9	0.843373	-0.245757	Lignans and Coumarins	Coumarins	ko00940,ko01110
Fraxetin-8-O-glucoside (Fraxin)	370.09	C16H18O10	1.25451	0.327124	Lignans and Coumarins	Coumarins	--
Ditartaroyl-hydroxycoumarin	426.043	C17H14O13	0.640355	-0.643057	Lignans and Coumarins	Coumarins	--
Schisandrol A	432.215	C24H32O7	0.608125	-0.71756	Lignans and Coumarins	Lignans	--
(7S,8S-Threo-3',4,7,9-tetrahydroxy-3-methoxy-8-O-4'-neolignan-9'-O-rhamnoside	510.21	C25H34O11	0.124931	-3.00079	Lignans and Coumarins	Lignans	--
Dihydrodehydrodiconiferyl alcohol-4-O-β-D-glucopyranoside	522.21	C26H34O11	1.27982	0.35594	Lignans and Coumarins	Lignans	--
Isolariciresinol-9'-O-glucoside	522.21	C26H34O11	1.05375	0.0755323	Lignans and Coumarins	Lignans	--
Lariciresinol-4'-O-glucoside	522.211	C26H34O11	1.41707	0.502912	Lignans and Coumarins	Lignans	--
Secoisolariciresinol 4-O-glucoside	524.226	C26H36O11	1.44554	0.531607	Lignans and Coumarins	Lignans	--
5'-Methoxyisolariciresinol-9'-O-glucoside	552.221	C27H36O12	0.275599	-1.85936	Lignans and Coumarins	Lignans	--
Syringaresinol-4'-O-glucoside	580.216	C28H36O13	1.36818	0.452255	Lignans and Coumarins	Lignans	--
Medioresinol-4,4'-di-O-glucoside	712.258	C33H44O17	0.574958	-0.798472	Lignans and Coumarins	Lignans	--
liriodendrin;Syringaresinol-di-O-glucoside	742.268	C34H46O18	0.578656	-0.789222	Lignans and Coumarins	Lignans	--
Octanoic acid	144.115	C8H16O2	0.600413	-0.735972	Lipids	Free fatty acids	ko00061,ko00785,ko01100
Undecylic Acid	186.162	C11H22O2	0.600582	-0.735568	Lipids	Free fatty acids	--
Dodecanoic acid (Lauric acid)	200.178	C12H24O2	0.327557	-1.61018	Lipids	Free fatty acids	ko00061,ko01100,ko01110
Tridecanoic Acid	214.193	C13H26O2	0.773143	-0.371194	Lipids	Free fatty acids	--
Myristoleic acid	226.193	C14H26O2	1.10495	0.143985	Lipids	Free fatty acids	--
Myristic Acid	228.209	C14H28O2	0.675782	-0.565369	Lipids	Free fatty acids	ko00061,ko01100
Cis-10-Pentadecenoic Acid(C15: 1)	240.209	C15H28O2	1.0308	0.0437649	Lipids	Free fatty acids	--
Palmitaldehyde	240.245	C16H32O	0.857547	-0.221712	Lipids	Free fatty acids	ko00071
13-methylmyristic acid	242.225	C15H30O2	0.782346	-0.354122	Lipids	Free fatty acids	--
Pentadecanoic Acid	242.225	C15H30O2	0.720332	-0.473266	Lipids	Free fatty acids	--
Palmitoleic Acid*	254.225	C16H30O2	0.726443	-0.461079	Lipids	Free fatty acids	ko00061
(7Z)-Hexadecenoic acid*	254.225	C16H30O2	0.469615	-1.09045	Lipids	Free fatty acids	--
Palmitic acid	256.24	C16H32O2	1.01345	0.0192739	Lipids	Free fatty acids	ko00061,ko00062,ko00071,ko00073,ko01040,ko01100,ko01212
Choline Alfoscerate	257.103	C8H20NO6P	1.02449	0.0349064	Lipids	PC	ko00564,ko00565
Methyl 7,10-hexadecadienoate	266.224	C17H30O2	1.00867	0.0124472	Lipids	Free fatty acids	--
10-Heptadecenoic Acid	268.24	C17H32O2	1.22047	0.287436	Lipids	Free fatty acids	--
16-Hydroxyhexadecanoic acid	272.235	C16H32O3	1.64236	0.715768	Lipids	Free fatty acids	ko00073,ko01100
Hexadecylsphingosine	273.267	C16H35NO2	0.966365	-0.0493598	Lipids	Sphingolipids	--
9,12-Octadecadien-6-Ynoic Acid	276.209	C18H28O2	0.712487	-0.489065	Lipids	Free fatty acids	--
Octadeca-11E,13E,15Z-trienoic acid	278.225	C18H30O2	0.899088	-0.153466	Lipids	Free fatty acids	--
Punicic acid (9Z,11E,13Z-octadecatrienoic acid)	278.225	C18H30O2	1.61912	0.695214	Lipids	Free fatty acids	--
γ-Linolenic Acid	278.225	C18H30O2	0.737502	-0.439281	Lipids	Free fatty acids	ko00591,ko01040,ko01100
α-Linolenic Acid	278.225	C18H30O2	0.638342	-0.647598	Lipids	Free fatty acids	ko00592,ko01040,ko01100,ko01110
Crepenynic acid	278.225	C18H30O2	0.691865	-0.531437	Lipids	Free fatty acids	ko00591
Linoleic acid	280.24	C18H32O2	0.658491	-0.602765	Lipids	Free fatty acids	ko00591,ko01040,ko01100
(9Z,11E)-Octadecadienoic acid	280.24	C18H32O2	0.636304	-0.652213	Lipids	Free fatty acids	ko00591
Oleamide (9-Octadecenamide)	281.272	C18H35NO	0.89349	-0.162476	Lipids	Free fatty acids	--
11-Octadecanoic acid(Vaccenic acid)	282.256	C18H34O2	1.37646	0.460965	Lipids	Free fatty acids	--
Petroselinic acid	282.256	C18H34O2	1.48217	0.56771	Lipids	Free fatty acids	--
16-Methylheptadecanoic acid	284.272	C18H36O2	1.36764	0.45169	Lipids	Free fatty acids	--
Stearic Acid	284.272	C18H36O2	1.3588	0.442337	Lipids	Free fatty acids	ko00061,ko01040
4-Oxo-9Z,11Z,13E,15E-Octadecatetraenoic Acid	290.188	C18H26O3	0.718759	-0.476421	Lipids	Free fatty acids	--
12-Oxo-phytodienoic acid	292.204	C18H28O3	0.422907	-1.24159	Lipids	Free fatty acids	ko00592,ko01100,ko01110
13S-Hydroxy-9Z,11E,15Z-octadecatrienoic acid	294.219	C18H30O3	1.3667	0.450695	Lipids	Free fatty acids	ko00592
13-Hydroxy-6,9,11-octadecatrienoic acid	294.219	C18H30O3	1.2788	0.354794	Lipids	Free fatty acids	--
9-Oxo-10E,12Z-octadecadienoic acid	294.219	C18H30O3	0.63996	-0.643946	Lipids	Free fatty acids	ko00591
9-Hydroxy-10,12,15-octadecatrienoic acid*	294.219	C18H30O3	0.455815	-1.13348	Lipids	Free fatty acids	ko00592
13-KODE; (9Z,11E)-13-Oxooctadeca-9,11-dienoic acid*	294.219	C18H30O3	0.550703	-0.860653	Lipids	Free fatty acids	ko00591
15(R)-Hydroxylinoleic Acid*	296.234	C18H32O3	0.879841	-0.184686	Lipids	Free fatty acids	--
9-Oxo-12Z-Octadecenoic acid*	296.234	C18H32O3	0.892429	-0.164191	Lipids	Free fatty acids	--
9S-Hydroxy-10E,12Z-octadecadienoic acid*	296.235	C18H32O3	1.73877	0.798063	Lipids	Free fatty acids	ko00591
12,13-Epoxy-9-Octadecenoic Acid	296.235	C18H32O3	0.686725	-0.542195	Lipids	Free fatty acids	ko00591,ko01100
9(10)-EpOME;(9R,10S)-(12Z)-9,10-Epoxyoctadecenoic acid	296.235	C18H32O3	0.789968	-0.340133	Lipids	Free fatty acids	ko00591,ko01100
13(S)-HODE;13(S)-Hydroxyoctadeca-9Z,11E-dienoic acid*	296.235	C18H32O3	1.83502	0.875797	Lipids	Free fatty acids	ko00591
Ricinoleic acid	298.251	C18H34O3	1.30019	0.378719	Lipids	Free fatty acids	--
1-Eicosanol	298.324	C20H42O	1.23646	0.306221	Lipids	Free fatty acids	--
3-Dehydrosphinganine	299.282	C18H37NO2	0.418032	-1.25831	Lipids	Sphingolipids	ko00600,ko01100
D-Sphingosine	299.282	C18H37NO2	0.569491	-0.812254	Lipids	Sphingolipids	ko00600,ko01100
2R-Hydroxyoctadecanoic Acid	300.266	C18H36O3	0.737914	-0.438476	Lipids	Free fatty acids	--
12-Hydroxyoctadecanoic acid	300.266	C18H36O3	0.807823	-0.307888	Lipids	Free fatty acids	--
DL-2-hydroxystearic acid	300.266	C18H36O3	0.691337	-0.53254	Lipids	Free fatty acids	--
3-Hydroxyoctadecanoic Acid	300.267	C18H36O3	0.8879	-0.171532	Lipids	Free fatty acids	--
1-Monomyristin	302.246	C17H34O4	1.33278	0.414434	Lipids	Free fatty acids	--
Eicosadienoic acid	308.272	C20H36O2	1.31036	0.389966	Lipids	Free fatty acids	ko01040
9-Hydroperoxy-10E,12,15Z-octadecatrienoic acid	310.1	C18H30O4	1.00818	0.0117563	Lipids	Free fatty acids	ko00592,ko01110
Eicosenoic acid	310.287	C20H38O2	0.842923	-0.246527	Lipids	Free fatty acids	ko01040
9-Hydroxy-13-oxo-10-octadecenoic Acid	312.23	C18H32O4	1.13772	0.186143	Lipids	Free fatty acids	--
9-Hydroxy-12-oxo-15(Z)-octadecenoic acid	312.23	C18H32O4	0.750648	-0.413792	Lipids	Free fatty acids	ko00592,ko01110
13S-Hydroperoxy-9Z,11E-octadecadienoic acid	312.23	C18H32O4	0.86569	-0.208078	Lipids	Free fatty acids	ko00591,ko01100
13-Hydroperoxy-9Z,11E-octadecadienoic acid	312.23	C18H32O4	1.258	0.331134	Lipids	Free fatty acids	--
9-Hydroperoxy-9Z,11E-Octadecadienoic Acid	312.23	C18H32O4	0.933509	-0.0992643	Lipids	Free fatty acids	ko00591,ko01100
7S,8S-DiHODE; (9Z,12Z)-(7S,8S)-Dihydroxyoctadeca-9,12-dienoic acid	312.23	C18H32O4	1.15054	0.202316	Lipids	Free fatty acids	ko00591
5S,8R-DiHODE; (5S,8R,9Z,12Z)-5,8-Dihydroxyoctadeca-9,12-dienoate	312.23	C18H32O4	1.31692	0.397165	Lipids	Free fatty acids	ko00591
12,13-DHOME; (9Z)-12,13-Dihydroxyoctadec-9-enoic acid	314.246	C18H34O4	1.06471	0.0904587	Lipids	Free fatty acids	ko00591
9,12,13-Trihydroxy-10,15-octadecadienoic acid	328.225	C18H32O5	0.623328	-0.681936	Lipids	Free fatty acids	--
Cis-4,7,10,13,16,19-Docosahexaenoic Acid	328.24	C22H32O2	0.65686	-0.606341	Lipids	Free fatty acids	ko01040
9,10,11-Trihydroxy-12-octadecenoic acid	330.24	C18H34O5	0.871389	-0.198612	Lipids	Free fatty acids	--
9,10,13-Trihydroxy-11-Octadecenoic Acid	330.241	C18H34O5	0.941374	-0.0871601	Lipids	Free fatty acids	ko00591
9,12,13-TriHOME; 9(S),12(S),13(S)-Trihydroxy-10(E)-octadecenoic acid	330.241	C18H34O5	0.746608	-0.421576	Lipids	Free fatty acids	ko00591
Monopalmitin	330.277	C19H38O4	0.511919	-0.966014	Lipids	Glycerol ester	--
Docosanoic acid (Behenic acid)	340.334	C22H44O2	0.715735	-0.482502	Lipids	Free fatty acids	ko00073,ko01040
10,16-Dihydroxypalmitic acid	288.23	C16H32O4	2.85082	1.51137	Lipids	Free fatty acids	ko00073
9,16-Dihydroxypalmitic acid	288.23	C16H32O4	3.1922	1.67455	Lipids	Free fatty acids	--
1-Stearidonoyl-Glycerol	350.246	C21H34O4	2.26573	1.17998	Lipids	Glycerol ester	--
LysoPE 16:3	447.239	C21H38NO7P	3.80093	1.92635	Lipids	LPE	--
1-α-Linolenoyl-glycerol	352.261	C21H36O4	0.897775	-0.155574	Lipids	Glycerol ester	--
2-α-Linolenoyl-glycerol	352.261	C21H36O4	0.902669	-0.147731	Lipids	Glycerol ester	--
1-Linoleoylglycerol	354.277	C21H38O4	1.17864	0.237129	Lipids	Glycerol ester	--
2-Linoleoylglycerol	354.277	C21H38O4	1.20353	0.267273	Lipids	Glycerol ester	--
1-Oleoyl-Sn-Glycerol	356.293	C21H40O4	0.391099	-1.35439	Lipids	Glycerol ester	--
Tetracosanoic Acid (Lignoceric acid)	368.365	C24H48O2	0.00114366	-9.77213	Lipids	Free fatty acids	ko01040
1,3-O-Dicaffeoylglycerol	416.111	C21H20O9	1.60034	0.678383	Lipids	Glycerol ester	--
LysoPE 14:0	425.254	C19H40NO7P	0.674045	-0.569082	Lipids	LPE	--
LysoPE 14:0(2n isomer)	425.254	C19H40NO7P	0.71689	-0.480177	Lipids	LPE	--
LysoPE 15:0	439.27	C20H42NO7P	0.781117	-0.356389	Lipids	LPE	--
LysoPE 15:0(2n isomer)	439.27	C20H42NO7P	0.694463	-0.526031	Lipids	LPE	--
LysoPE 16:1	451.27	C21H42NO7P	0.349542	-1.51646	Lipids	LPE	--
LysoPE 16:0(2n isomer)	453.286	C21H44NO7P	0.595088	-0.748826	Lipids	LPE	--
LysoPE 16:0	453.286	C21H44NO7P	0.594913	-0.74925	Lipids	LPE	--
LysoPE 17:1	465.286	C22H44NO7P	1.2594	0.332739	Lipids	LPE	--
LysoPC 14:0	467.301	C22H46NO7P	0.510604	-0.969723	Lipids	LPC	--
LysoPE 17:0	467.301	C22H46NO7P	0.406355	-1.29919	Lipids	LPE	--
LysoPE 18:3	475.27	C23H42NO7P	0.552635	-0.855601	Lipids	LPE	--
LysoPE 18:3(2n isomer)	475.27	C23H42NO7P	0.534554	-0.903593	Lipids	LPE	--
LysoPE 18:2	477.286	C23H44NO7P	0.719962	-0.474008	Lipids	LPE	--
LysoPE 18:2(2n isomer)	477.286	C23H44NO7P	0.672315	-0.57279	Lipids	LPE	--
LysoPC 15:1	479.301	C23H46NO7P	0.0968655	-3.36787	Lipids	LPC	--
LysoPE 18:1(2n isomer)	479.301	C23H46NO7P	0.73539	-0.443418	Lipids	LPE	--
LysoPE 18:1	479.301	C23H46NO7P	0.717213	-0.479527	Lipids	LPE	--
LysoPC 15:0	481.317	C23H48NO7P	0.640201	-0.643404	Lipids	LPC	--
LysoPE 18:0	481.317	C23H48NO7P	0.524853	-0.930014	Lipids	LPE	--
LysoPC 15:0(2n isomer)	481.317	C23H48NO7P	0.684845	-0.546151	Lipids	LPC	--
LysoPG 16:0	484.278	C22H45O9P	0.907982	-0.139265	Lipids	Glycerol ester	--
LysoPC 16:2(2n isomer)	491.301	C24H46NO7P	0.247776	-2.01289	Lipids	LPC	--
LysoPC 16:2	491.301	C24H46NO7P	0.368963	-1.43845	Lipids	LPC	--
LysoPC 16:1	493.317	C24H48NO7P	0.257051	-1.95987	Lipids	LPC	--
LysoPC 16:0(2n isomer)	495.332	C24H50NO7P	0.496153	-1.01114	Lipids	LPC	--
LysoPC 16:0	495.332	C24H50NO7P	0.503354	-0.990356	Lipids	LPC	--
LysoPE 20:3	503.301	C25H46NO7P	0.519001	-0.946191	Lipids	LPE	--
LysoPC 17:2	505.317	C25H48NO7P	0.497698	-1.00666	Lipids	LPC	--
LysoPC 17:1	507.332	C25H50NO7P	0.464382	-1.10662	Lipids	LPC	--
LysoPC 17:0	509.348	C25H52NO7P	0.396377	-1.33506	Lipids	LPC	--
1-α-Linolenoyl-glycerol-3-O-glucoside	514.314	C27H46O9	0.376447	-1.40948	Lipids	Glycerol ester	--
2-α-Linolenoyl-glycerol-1-O-glucoside	514.314	C27H46O9	0.366092	-1.44972	Lipids	Glycerol ester	--
LysoPC 18:4	515.297	C26H46NO7P	0.975633	-0.0355902	Lipids	LPC	--
LysoPC 18:3(2n isomer)	517.317	C26H48NO7P	0.392493	-1.34926	Lipids	LPC	--
LysoPC 18:3	517.317	C26H48NO7P	0.407081	-1.29661	Lipids	LPC	--
LysoPC 18:2	519.332	C26H50NO7P	0.521698	-0.938714	Lipids	LPC	--
LysoPC 18:2(2n isomer)	519.332	C26H50NO7P	0.527363	-0.923131	Lipids	LPC	--
LysoPC 18:1	521.348	C26H52NO7P	0.603539	-0.728481	Lipids	LPC	--
LysoPC 18:1(2n isomer)	521.348	C26H52NO7P	0.610379	-0.712222	Lipids	LPC	--
LysoPC 18:0(2n isomer)	523.364	C26H54NO7P	0.42258	-1.2427	Lipids	LPC	--
LysoPC 18:0	523.364	C26H54NO7P	0.425653	-1.23225	Lipids	LPC	--
LysoPC 19:2	533.348	C27H52NO7P	0.563306	-0.82801	Lipids	LPC	--
LysoPC 19:1	535.364	C27H54NO7P	0.767674	-0.381434	Lipids	LPC	--
LysoPC 20:5	541.317	C28H48NO7P	0.0836136	-3.58012	Lipids	LPC	--
LysoPC 20:4	543.332	C28H50NO7P	0.483717	-1.04776	Lipids	LPC	--
LysoPC 20:3	545.348	C28H52NO7P	0.519534	-0.94471	Lipids	LPC	--
LysoPC 20:2	547.364	C28H54NO7P	0.695259	-0.524377	Lipids	LPC	--
LysoPC 20:1	549.379	C28H56NO7P	0.993244	-0.00977949	Lipids	LPC	--
LysoPC 20:0	551.395	C28H58NO7P	0.0346834	-4.84961	Lipids	LPC	--
PE(oxo-11:0/16:0)	635.414	C32H62NO9P	0.260754	-1.93924	Lipids	Glycerol ester	--
1-Linolenoyl-rac-glycerol-diglucoside	676.367	C33H56O14	0.492106	-1.02296	Lipids	Free fatty acids	--
2-α-Linolenoyl-glycerol-1,3-di-O-glucoside	676.367	C33H56O14	0.631402	-0.66337	Lipids	Glycerol ester	--
PC(oxo-11:0/18:2)	701.46	C37H68NO9P	0.282587	-1.82323	Lipids	PC	--
1-acetoxy-2-isocyano-Propane	127.063	C6H9NO2	1.40197	0.487451	Nitrogen compounds	-	--
1-methylguanidine	73.064	C2H7N3	0.778384	-0.361447	Nucleotides and derivatives	Nucleotides and derivatives	--
Cytosine	111.043	C4H5N3O	1.01388	0.0198917	Nucleotides and derivatives	Nucleotides and derivatives	ko00240,ko01100
Uracil	112.027	C4H4N2O2	1.64705	0.719884	Nucleotides and derivatives	Nucleotides and derivatives	ko00240,ko00410,ko00770,ko01100
5-Methylcytosine	125.059	C5H7N3O	1.21962	0.28643	Nucleotides and derivatives	Nucleotides and derivatives	ko00240,ko01100
Thymine	126.043	C5H6N2O2	1.32716	0.408346	Nucleotides and derivatives	Nucleotides and derivatives	ko00240,ko01100
Adenine	135.054	C5H5N5	0.899234	-0.153232	Nucleotides and derivatives	Nucleotides and derivatives	ko00230,ko00908,ko01100
2-Aminopurine	135.054	C5H5N5	1.19221	0.253638	Nucleotides and derivatives	Nucleotides and derivatives	--
Hypoxanthine	136.039	C5H4N4O	0.18889	-2.40438	Nucleotides and derivatives	Nucleotides and derivatives	ko00230,ko01100
1-Methyladenine	149.07	C6H7N5	0.774357	-0.368929	Nucleotides and derivatives	Nucleotides and derivatives	--
Guanine	151.049	C5H5N5O	0.499614	-1.00112	Nucleotides and derivatives	Nucleotides and derivatives	ko00230,ko01100
Isoguanine	151.049	C5H5N5O	0.384055	-1.38061	Nucleotides and derivatives	Nucleotides and derivatives	--
Xanthine	152.033	C5H4N4O2	1.95863	0.969845	Nucleotides and derivatives	Nucleotides and derivatives	ko00230,ko00232,ko01100,ko01110
6-Methylmercaptopurine	166.031	C6H6N4S	0.82872	-0.271044	Nucleotides and derivatives	Nucleotides and derivatives	--
2-Deoxyribose-1-phosphate	214.024	C5H11O7P	0.254629	-1.97353	Nucleotides and derivatives	Nucleotides and derivatives	ko00030,ko00240,ko01100
2-Deoxyribose-5'-phosphate	214.024	C5H11O7P	0.25558	-1.96815	Nucleotides and derivatives	Nucleotides and derivatives	ko00030,ko01100
2'-Deoxycytidine	227.091	C9H13N3O4	0.962261	-0.0555005	Nucleotides and derivatives	Nucleotides and derivatives	ko00240,ko01100,ko02010
Thymidine	242.09	C10H14N2O5	1.91473	0.937138	Nucleotides and derivatives	Nucleotides and derivatives	ko00240,ko01100
Cytidine	243.086	C9H13N3O5	1.4651	0.550996	Nucleotides and derivatives	Nucleotides and derivatives	ko00240,ko01100,ko02010
Cytarabine	243.086	C9H13N3O5	1.43489	0.520935	Nucleotides and derivatives	Nucleotides and derivatives	--
1-beta-D-Arabinofuranosyluracil	244.07	C9H12N2O6	1.15841	0.212146	Nucleotides and derivatives	Nucleotides and derivatives	--
β-Pseudouridine	244.07	C9H12N2O6	1.49609	0.5812	Nucleotides and derivatives	Nucleotides and derivatives	ko00240,ko01100
Uridine	244.07	C9H12N2O6	1.37596	0.46044	Nucleotides and derivatives	Nucleotides and derivatives	ko00240,ko01100,ko02010
2'-Deoxyadenosine	251.102	C10H13N5O3	0.877284	-0.188884	Nucleotides and derivatives	Nucleotides and derivatives	ko00230,ko01100,ko02010
5'-Deoxyadenosine	251.102	C10H13N5O3	0.562331	-0.830508	Nucleotides and derivatives	Nucleotides and derivatives	--
2'-Deoxyguanosine	267.097	C10H13N5O4	0.604343	-0.726561	Nucleotides and derivatives	Nucleotides and derivatives	ko00230,ko01100,ko02010
Adenosine	267.097	C10H13N5O4	1.12745	0.17307	Nucleotides and derivatives	Nucleotides and derivatives	ko00230,ko01100,ko02010
9-(Arabinosyl)hypoxanthine	268.081	C10H12N4O5	0.547262	-0.869696	Nucleotides and derivatives	Nucleotides and derivatives	--
2'-O-Methyladenosine	281.112	C11H15N5O4	0.83395	-0.261968	Nucleotides and derivatives	Nucleotides and derivatives	--
Guanosine	283.092	C10H13N5O5	1.26506	0.339211	Nucleotides and derivatives	Nucleotides and derivatives	ko00230,ko01100,ko02010
5'-Deoxy-5'-(methylthio)adenosine	297.09	C11H15N5O3S	0.681087	-0.554089	Nucleotides and derivatives	Nucleotides and derivatives	ko00270,ko00908,ko01100
N7-Methylguanosine	297.107	C11H15N5O5	0.800728	-0.320616	Nucleotides and derivatives	Nucleotides and derivatives	--
8-Hydroxyguanosine	299.087	C10H13N5O6	1.17471	0.2323	Nucleotides and derivatives	Nucleotides and derivatives	--
2-(Dimethylamino)guanosine	311.123	C12H17N5O5	1.1188	0.161957	Nucleotides and derivatives	Nucleotides and derivatives	--
N6-(2-Hydroxyethyl)adenosine	311.123	C12H17N5O5	1.14683	0.197654	Nucleotides and derivatives	Nucleotides and derivatives	--
Cytidine 5'-monophosphate(Cytidylic acid)	323.052	C9H14N3O8P	0.565423	-0.822598	Nucleotides and derivatives	Nucleotides and derivatives	ko00240,ko01100
Uridine 5'-monophosphate	324.036	C9H13N2O9P	0.485608	-1.04214	Nucleotides and derivatives	Nucleotides and derivatives	ko00240,ko01100
Cyclic 3',5'-Adenylic acid	329.053	C10H12N5O6P	0.994713	-0.00764734	Nucleotides and derivatives	Nucleotides and derivatives	ko00230,ko01100
2'-Deoxyadenosine-5'-monophosphate	331.068	C10H14N5O6P	0.810014	-0.303981	Nucleotides and derivatives	Nucleotides and derivatives	ko00230,ko01100
2'-Deoxyinosine-5'-monophosphate	332.052	C10H13N4O7P	0.634878	-0.655448	Nucleotides and derivatives	Nucleotides and derivatives	ko00230
Guanosine 3',5'-cyclic monophosphate	345.047	C10H12N5O7P	1.28949	0.366795	Nucleotides and derivatives	Nucleotides and derivatives	ko00230,ko01100
Adenosine 5'-monophosphate	347.063	C10H14N5O7P	1.39323	0.47843	Nucleotides and derivatives	Nucleotides and derivatives	ko00230,ko00908,ko01100,ko01110
Inosine 5'-monophosphate	348.047	C10H13N4O8P	1.29782	0.376087	Nucleotides and derivatives	Nucleotides and derivatives	ko00230,ko01100,ko01110
Xanthosine	284.076	C10H12N4O6	2.4523	1.29413	Nucleotides and derivatives	Nucleotides and derivatives	ko00230,ko00232,ko01100,ko01110,ko02010
2'-Deoxycytidine-5'-monophosphate	307.057	C9H14N3O7P	2371.85	11.2118	Nucleotides and derivatives	Nucleotides and derivatives	ko00240,ko01100
β-Nicotinamide mononucleotide	334.057	C11H15N2O8P	2222.52	11.118	Nucleotides and derivatives	Nucleotides and derivatives	ko00760,ko01100
Guanosine 5'-monophosphate	363.058	C10H14N5O8P	1.06389	0.08935	Nucleotides and derivatives	Nucleotides and derivatives	ko00230,ko01100
Isopentenyladenine-7-N-glucoside	365.17	C16H23N5O5	0.962279	-0.0554727	Nucleotides and derivatives	Nucleotides and derivatives	--
Succinyladenosine	383.108	C14H17N5O8	0.577889	-0.791135	Nucleotides and derivatives	Nucleotides and derivatives	--
Ribosyladenosine	399.139	C15H21N5O8	0.771601	-0.374073	Nucleotides and derivatives	Nucleotides and derivatives	--
Uridine 5'-diphosphate	404.002	C9H14N2O12P2	0.899307	-0.153114	Nucleotides and derivatives	Nucleotides and derivatives	ko00240,ko00908,ko01100
Adenosine 5'-diphosphate	427.029	C10H15N5O10P2	0.513003	-0.96296	Nucleotides and derivatives	Nucleotides and derivatives	ko00190,ko00195,ko00230,ko00908,ko01100,ko01110
Flavin Single Nucleotide(FMN)	456.105	C17H21N4O9P	0.662109	-0.59486	Nucleotides and derivatives	Nucleotides and derivatives	ko00190,ko00740,ko01100,ko01110
Uridine-5'-Diphosphate-D-Xylose	536.044	C14H22N2O16P2	1.03956	0.0559665	Nucleotides and derivatives	Nucleotides and derivatives	ko00520,ko00908,ko01100
Uridine 5'-diphospho-D-glucose	566.055	C15H24N2O17P2	0.924892	-0.112644	Nucleotides and derivatives	Nucleotides and derivatives	ko00040,ko00052,ko00053,ko00240,ko00500,ko00520,ko00561,ko00908,ko01100,ko01110
Nicotinic acid adenine dinucleotide	663.109	C21H27N7O14P2	1.02291	0.032674	Nucleotides and derivatives	Nucleotides and derivatives	ko00190,ko00730,ko00760,ko01100
NADP (Nicotinamide adenine dinucleotide phosphate)	743.075	C21H28N7O17P3	0.824776	-0.277926	Nucleotides and derivatives	Nucleotides and derivatives	ko00195,ko00480,ko00760,ko01100
Riboflavin 5'-Adenosine Diphosphate	785.157	C27H33N9O15P2	0.524332	-0.931446	Nucleotides and derivatives	Nucleotides and derivatives	ko00740,ko01100,ko01110
1-Aminocyclopropane-1-carboxylic acid	101.048	C4H7NO2	1.26065	0.334167	Organic acids	Organic acids	ko00270,ko01100,ko01110
γ-Aminobutyric acid	103.063	C4H9NO2	0.257989	-1.95462	Organic acids	Organic acids	ko00250,ko00330,ko00410,ko00650,ko00760,ko01100
β-Hydroxyisovaleric acid	118.063	C5H10O3	1.43586	0.521912	Organic acids	Organic acids	ko00280,ko01100
L-Homoserine*	119.058	C4H9NO3	1.17639	0.234371	Organic acids	Organic acids	ko00260,ko00270,ko00300,ko00920,ko01100,ko01110,ko01230
2-Picolinic acid	123.032	C6H5NO2	1.16496	0.220275	Organic acids	Organic acids	ko00380,ko01100
Isonicotinic acid	123.032	C6H5NO2	1.13542	0.183221	Organic acids	Organic acids	--
Methylenesuccinic acid	130.027	C5H6O4	0.000299434	-11.7055	Organic acids	Organic acids	ko00660,ko01100
6-Aminocaproic acid	131.095	C6H13NO2	1.83617	0.8767	Organic acids	Organic acids	ko01100
Glutaric acid	132.042	C5H8O4	0.604493	-0.726203	Organic acids	Organic acids	ko00071,ko00310,ko01100
2-Methylsuccinic acid*	132.042	C5H8O4	0.506784	-0.980558	Organic acids	Organic acids	--
Monomethyl succinate*	132.042	C5H8O4	0.63686	-0.650952	Organic acids	Organic acids	--
D-Malic acid	134.022	C4H6O5	0.845387	-0.242316	Organic acids	Organic acids	ko00650,ko01100
L-Malic acid*	134.022	C4H6O5	0.822999	-0.281037	Organic acids	Organic acids	ko00020,ko00620,ko00630,ko00710,ko01100,ko01110,ko01200
3-Dehydro-L-Threonic Acid*	134.022	C4H6O5	1.41404	0.49982	Organic acids	Organic acids	ko00053,ko01100
Muconic acid	142.027	C6H6O4	0.806445	-0.310352	Organic acids	Organic acids	ko01100
4-Guanidinobutyric acid	145.085	C5H11N3O2	1.10187	0.139949	Organic acids	Organic acids	ko00330,ko01100
α-Ketoglutaric acid	146.022	C5H6O5	0.0434445	-4.52468	Organic acids	Organic acids	ko00020,ko00040,ko00053,ko00220,ko00250,ko00300,ko00310,ko00340,ko00430,ko00630,ko00650,ko00660,ko01100,ko01110,ko01200,ko01210,ko01230
2,2-Dimethylsuccinic acid	146.058	C6H10O4	0.273958	-1.86797	Organic acids	Organic acids	--
2-Methylglutaric acid*	146.058	C6H10O4	0.343153	-1.54308	Organic acids	Organic acids	--
Adipic Acid*	146.058	C6H10O4	0.35696	-1.48616	Organic acids	Organic acids	ko01100
2-Acetyl-2-Hydroxybutanoic Acid	146.058	C6H10O4	0.332941	-1.58666	Organic acids	Organic acids	ko00290,ko01100,ko01110,ko01210,ko01230
2-Hydroxyglutaric Acid*	148.037	C5H8O5	0.000257155	-11.9251	Organic acids	Organic acids	ko00310,ko01100
L-Citramalic acid	148.037	C5H8O5	0.91187	-0.1331	Organic acids	Organic acids	ko00660,ko01100
3-Methylmalic acid*	148.037	C5H8O5	0.811064	-0.302113	Organic acids	Organic acids	ko00290,ko00660,ko01100,ko01210,ko01230
Mevalonic acid	148.074	C6H12O4	6.58938e-06	-17.2114	Organic acids	Organic acids	ko00900,ko01100,ko01110
L-Tartaric acid	150.016	C4H6O6	0.000256761	-11.9273	Organic acids	Organic acids	ko00630,ko01100
Benzyl acetate	150.068	C9H10O2	1.42229	0.508214	Organic acids	Organic acids	--
3-Hydroxyanthranilic acid	153.043	C7H7NO3	1.45201	0.538056	Organic acids	Organic acids	ko00380,ko01100
2,3-Dihydroxybenzoic Acid*	154.027	C7H6O4	1.5979	0.676174	Organic acids	Organic acids	ko01110
5-Acetamidopentanoic Acid	159.09	C7H13NO3	0.677314	-0.562104	Organic acids	Organic acids	ko00310,ko01100
Pimelic acid	160.074	C7H12O4	0.572041	-0.805809	Organic acids	Organic acids	ko00780,ko01100
4-Hydroxy-2-oxoglutaric acid	162.016	C5H6O6	1.27628	0.351948	Organic acids	Organic acids	ko00630,ko01100
Phenylpyruvic acid	164.047	C9H8O3	0.116454	-3.10217	Organic acids	Organic acids	ko00360,ko00400,ko00960,ko01100,ko01110,ko01210,ko01230
Phthalic acid	166.027	C8H6O4	0.610312	-0.71238	Organic acids	Organic acids	ko01100,ko02010
D-Xylonic acid	166.048	C5H10O6	0.663461	-0.591917	Organic acids	Organic acids	ko00040,ko01100
Phosphoenolpyruvate	167.982	C3H5O6P	0.607639	-0.718713	Organic acids	Organic acids	ko00010,ko00020,ko00400,ko00440,ko00620,ko00710,ko00998,ko01100,ko01110,ko01200,ko01230
2,4,6-Trihydroxybenzoic acid	170.022	C7H6O5	1.95177	0.964781	Organic acids	Organic acids	--
3-Dehydroshikimic acid	172.037	C7H8O5	0.829366	-0.26992	Organic acids	Organic acids	ko00400,ko01100,ko01110,ko01230
9-Oxononanoic acid	172.11	C9H16O3	0.821873	-0.283012	Organic acids	Organic acids	ko00592,ko01110
Decanoic acid	172.146	C10H20O2	0.442578	-1.176	Organic acids	Organic acids	ko00061,ko01100
Trans-Citridic acid	174.016	C6H6O6	1.09669	0.133158	Organic acids	Organic acids	ko00660,ko01100
Shikimic acid	174.053	C7H10O5	1.01077	0.0154478	Organic acids	Organic acids	ko00400,ko01100,ko01110,ko01230
Suberic Acid	174.089	C8H14O4	0.433945	-1.20442	Organic acids	Organic acids	--
2-Propylglutaric acid	174.089	C8H14O4	0.722373	-0.469183	Organic acids	Organic acids	--
2-Propylmalic Acid*	176.068	C7H12O5	0.375014	-1.41498	Organic acids	Organic acids	ko00620
2-Isopropylmalic Acid	176.068	C7H12O5	0.371019	-1.43043	Organic acids	Organic acids	ko00290,ko00620,ko01100,ko01110,ko01210,ko01230
3-Isopropylmalic Acid*	176.068	C7H12O5	0.405524	-1.30214	Organic acids	Organic acids	ko00290,ko01100,ko01110,ko01210,ko01230
Azelaic acid	188.105	C9H16O4	0.685765	-0.544215	Organic acids	Organic acids	--
Isocitric Acid	192.027	C6H8O7	0.866785	-0.206253	Organic acids	Organic acids	ko00020,ko00630,ko01100,ko01110,ko01200,ko01210,ko01230
Citric Acid	192.027	C6H8O7	0.599733	-0.737607	Organic acids	Organic acids	ko00020,ko00250,ko00630,ko01100,ko01110,ko01200,ko01210,ko01230
Quinic Acid	192.063	C7H12O6	0.804261	-0.314264	Organic acids	Organic acids	ko00400,ko01100
D-Galacturonic acid*	194.033	C6H10O7	1.17807	0.236423	Organic acids	Organic acids	ko00040,ko00053,ko00520,ko01100,ko02010
4,8-Dihydroxyquinoline-2-carboxylic acid	205.038	C10H7NO4	1.36235	0.446099	Organic acids	Organic acids	ko00380
Methyl jasmonate	224.141	C13H20O3	1.04856	0.0684038	Organic acids	Organic acids	ko00592,ko01110
Dodecanedioic aicd	230.152	C12H22O4	1.20794	0.272547	Organic acids	Organic acids	--
Tridecanedioic acid	244.167	C13H24O4	0.838535	-0.254057	Organic acids	Organic acids	--
1,14-Tetradecanedioic Acid	258.183	C14H26O4	0.989212	-0.0156476	Organic acids	Organic acids	--
Abscisic acid	264.136	C15H20O4	1.47812	0.563765	Organic acids	Organic acids	ko00906,ko01100,ko01110,ko04075
Hexadecanedioic acid	286.214	C16H30O4	1.24228	0.312989	Organic acids	Organic acids	ko00073,ko01100
Argininosuccinic acid	290.123	C10H18N4O6	0.624592	-0.679015	Organic acids	Organic acids	ko00220,ko00250,ko01100,ko01110,ko01230
3-Hydroxypropanoic acid	90.032	C3H6O3	2.43773	1.28554	Organic acids	Organic acids	ko00240,ko00410,ko00640,ko01100,ko01200
Succinic anhydride	100.018	C4H4O3	4.80603	2.26484	Organic acids	Organic acids	--
3-Hydroxybutyric acid	104.047	C4H8O3	2.08556	1.06044	Organic acids	Organic acids	ko00072,ko00650,ko01100
Malonic acid	104.06	C3H4O4	2.87829	1.52521	Organic acids	Organic acids	ko00061,ko00240,ko00410,ko01100,ko01212
Methylmalonic acid*	118.027	C4H6O4	3.01211	1.59078	Organic acids	Organic acids	ko00240,ko00280,ko00640,ko01100
Succinic acid*	118.027	C4H6O4	2.93167	1.55172	Organic acids	Organic acids	ko00020,ko00190,ko00250,ko00310,ko00350,ko00360,ko00620,ko00630,ko00640,ko00650,ko00760,ko00920,ko01100,ko01110,ko01200
3-Hydroxybenzoic Acid	138.032	C7H6O3	42.1694	5.39813	Organic acids	Organic acids	ko00400
4-Acetamidobutyric acid	145.074	C6H11NO3	18.2541	4.19015	Organic acids	Organic acids	ko00330,ko01100
2-Oxoadipic acid	160.037	C6H8O5	5.51398	2.4631	Organic acids	Organic acids	ko00300,ko00310,ko00380,ko01100,ko01110,ko01210,ko01230
2-Hydroxycinnamic acid*	164.047	C9H8O3	2.08679	1.06129	Organic acids	Organic acids	ko00360,ko00940,ko01100,ko01110
2-Hydroxyhexadecanoic acid	272.235	C16H32O3	2.89061	1.53137	Organic acids	Organic acids	--
Boron, [3-imino-2-(1-iminoethyl)butanenitrilato-N2,N3]dipropyl-, (t-4)-	219.191	C12H22BN3	0.613794	-0.704173	Other	-	--
3-Methyl-1-pentanol	102.104	C6H14O	0.00027349	-11.8362	Others	Saccharides and Alcohols	--
D-(-)-Threose	120.042	C4H8O4	0.445277	-1.16723	Others	Saccharides and Alcohols	--
Nicotinamide	122.048	C6H6N2O	0.984935	-0.0218989	Others	Vitamin	ko00760,ko01100
D-Threitol	122.058	C4H10O4	0.910519	-0.13524	Others	Saccharides and Alcohols	--
Nicotinic acid (Vitamin B3)	123.032	C6H5NO2	1.24902	0.320801	Others	Vitamin	ko00760,ko00960,ko01100,ko01110
D-Threonic Acid	136.037	C4H8O5	1.46136	0.547314	Others	Saccharides and Alcohols	--
D-Arabinono-1,4-lactone	148.037	C5H8O5	1.05428	0.0762625	Others	Saccharides and Alcohols	--
D-Ribose	150.053	C5H10O5	1.17899	0.237547	Others	Saccharides and Alcohols	ko00030,ko01100,ko02010
DL-Xylose	150.053	C5H10O5	1.66619	0.73655	Others	Saccharides and Alcohols	--
L-Xylose	150.053	C5H10O5	1.40357	0.489102	Others	Saccharides and Alcohols	--
D-Arabinose	150.053	C5H10O5	1.29439	0.372268	Others	Saccharides and Alcohols	--
Xylitol	152.068	C5H12O5	1.23825	0.308299	Others	Saccharides and Alcohols	ko00040,ko01100,ko02010
L-Arabitol	152.068	C5H12O5	1.50483	0.589601	Others	Saccharides and Alcohols	ko00040,ko01100
D-Arabitol*	152.068	C5H12O5	1.69474	0.761063	Others	Saccharides and Alcohols	ko00040,ko01100
Ribitol*	152.068	C5H12O5	1.55939	0.640979	Others	Saccharides and Alcohols	ko00040,ko00740,ko01100
2-Decanol	158.167	C10H22O	0.922159	-0.116912	Others	Saccharides and Alcohols	--
1-Decanol	158.167	C10H22O	0.924047	-0.113962	Others	Saccharides and Alcohols	--
Cis-Jasmone	164.12	C11H16O	0.493441	-1.01905	Others	Others	--
Pyridoxal	167.058	C8H9NO3	1.01431	0.0205005	Others	Vitamin	ko00750,ko01100
Pyridoxine	169.074	C8H11NO3	0.557817	-0.842137	Others	Vitamin	ko00750,ko01100
Dehydroascorbic acid	174.016	C6H6O6	0.388617	-1.36358	Others	Vitamin	ko00053,ko00480,ko01100
Erythorbic Acid; Isoascorbic Acid	176.032	C6H8O6	0.540047	-0.888843	Others	Vitamin	--
D-Glucurono-6,3-lactone	176.032	C6H8O6	0.0587866	-4.08837	Others	Saccharides and Alcohols	ko00053,ko01100
L-Ascorbic acid (Vitamin C)	176.032	C6H8O6	0.0120635	-6.37321	Others	Vitamin	ko00053,ko00480,ko01100,ko01110
D-Glucosamine	179.079	C6H13NO5	1.18973	0.25063	Others	Saccharides and Alcohols	ko00520,ko01100
D-Galactose*	180.063	C6H12O6	1.75283	0.809686	Others	Saccharides and Alcohols	ko00052,ko01100
D-Mannose*	180.063	C6H12O6	1.95608	0.967965	Others	Saccharides and Alcohols	ko00051,ko00052,ko00520,ko01100,ko02010
L-Glucose	180.063	C6H12O6	1.92046	0.941455	Others	Saccharides and Alcohols	--
D-Glucose*	180.063	C6H12O6	1.81773	0.86214	Others	Saccharides and Alcohols	ko00010,ko00030,ko00052,ko00500,ko00520,ko00901,ko01100,ko01110,ko02010
Dihydroactinidiolide	180.115	C11H16O2	0.874123	-0.194092	Others	Others	--
D-Mannitol*	182.079	C6H14O6	1.53715	0.620261	Others	Saccharides and Alcohols	ko00051,ko01100,ko02010
4-Pyridoxic acid	183.053	C8H9NO4	1.75862	0.814443	Others	Vitamin	ko00750,ko01100
3-Phospho-D-glyceric acid	185.993	C3H7O7P	0.584129	-0.77564	Others	Saccharides and Alcohols	ko00010,ko00030,ko00260,ko00270,ko00561,ko00630,ko00710,ko01100,ko01110,ko01200,ko01230
2,6-Dimethyl-7-octene-2,3,6-triol	188.141	C10H20O3	0.672003	-0.57346	Others	Saccharides and Alcohols	--
D-Glucoronic acid*	194.043	C6H10O7	1.39086	0.475973	Others	Saccharides and Alcohols	ko00040,ko00053,ko00520,ko00562,ko01100
Dimethyl phthalate	194.058	C10H10O4	1.06181	0.086531	Others	Others	--
Cinidilide	194.131	C12H18O2	0.801881	-0.31854	Others	Others	--
Gluconic acid	196.058	C6H12O7	1.60864	0.685843	Others	Saccharides and Alcohols	ko00030,ko01100,ko01110,ko01200
Hydroxydihydrobovolide	198.126	C11H18O3	0.898556	-0.15432	Others	Others	--
D-Panthenol	205.131	C9H19NO4	0.986302	-0.0198979	Others	Saccharides and Alcohols	ko00770
Dambonitol	208.095	C8H16O6	1.84084	0.880361	Others	Saccharides and Alcohols	--
D-Saccharic acid*	210.038	C6H10O8	1.81774	0.862147	Others	Saccharides and Alcohols	ko00053,ko01100
D-Pantothenic Acid	219.111	C9H17NO5	0.723121	-0.467691	Others	Vitamin	ko00410,ko00770,ko01100,ko01110
N-Acetyl-D-glucosamine	221.09	C8H15NO6	0.91022	-0.135713	Others	Saccharides and Alcohols	ko00520,ko01100,ko02010
N-Acetyl-D-galactosamine	221.09	C8H15NO6	0.751679	-0.411812	Others	Saccharides and Alcohols	ko00052,ko01100
Nicotinate D-ribonucleoside	256.082	C11H14NO6+	1.063	0.0881452	Others	Vitamin	ko00760,ko01100
D-Glucosamine 1-phosphate	259.046	C6H14NO8P	0.757918	-0.399886	Others	Saccharides and Alcohols	ko00520,ko01100
D-Fructose 6-Phosphate	260.03	C6H13O9P	0.67644	-0.563967	Others	Saccharides and Alcohols	ko00052,ko00500,ko00710,ko01100,ko01110,ko01200
Glucose-1-phosphate*	260.03	C6H13O9P	0.733046	-0.448024	Others	Saccharides and Alcohols	ko00010,ko00040,ko00052,ko00500,ko00520,ko00523,ko00561,ko01100,ko01110
D-Glucose 6-phosphate*	260.03	C6H13O9P	0.713223	-0.487575	Others	Saccharides and Alcohols	ko00500,ko00562,ko00998,ko01100,ko01110
Sorbitol-6-phosphate	262.045	C6H15O9P	0.744422	-0.425808	Others	Saccharides and Alcohols	ko00051,ko01100
Denthyrsinin	270.089	C16H14O4	1.68521	0.752926	Others	Others	--
3,5-Dihydroxy-2,4-dimethoxy-9H-fluoren-9-one	272.068	C15H12O5	1.61453	0.691113	Others	Others	--
α-Arbutin	272.09	C12H16O7	1.44864	0.534698	Others	Others	--
3',4-Dihydroxy-3,5'-dimethoxybibenzyl	274.12	C16H18O4	1.634	0.708412	Others	Stilbene	--
Dendrobin A	274.121	C16H18O4	1.83161	0.873114	Others	Others	--
Pantetheine	278.13	C11H22N2O4S	0.937563	-0.093013	Others	Others	ko00332,ko00770,ko01110
Butyl isobutyl phthalate	278.152	C16H22O4	0.923286	-0.11515	Others	Others	--
Dendrobiumane D	284.162	C15H24O5	0.52038	-0.942361	Others	Others	--
Glucarate O-Phosphoric acid	290.004	C6H11PO11	1.23211	0.301128	Others	Saccharides and Alcohols	--
D-Sedoheptuiose 7-phosphate	290.04	C7H15O10P	1.06217	0.0870105	Others	Saccharides and Alcohols	--
(+)-cis-Abienol	290.261	C20H34O	1.06232	0.0872172	Others	Saccharides and Alcohols	--
2R-hydroxy-9Z,12Z,15Z-octadecatrienoic acid	294.219	C18H30O3	0.833016	-0.263584	Others	Others	ko00592
17-Hydroxylinolenic acid	294.219	C18H30O3	1.37665	0.461165	Others	Others	ko00592
4-Oxoretinol	300.209	C20H28O2	1.15858	0.212358	Others	Vitamin	--
13(s)-hydroperoxy-(9z,11e,15z)-octadecatrienoic acid	310.214	C18H30O4	0.777931	-0.362286	Others	Others	ko00592,ko01100,ko01110
9-Hydroxy-12-oxo-10(E),15(Z)-octadecadienoic acid	310.214	C18H30O4	0.956605	-0.0640047	Others	Others	ko00592,ko01110
Vanilloloside	316.116	C14H20O8	1.42722	0.513209	Others	Others	--
Ferulic acid-1-O-glucoside	326.1	C15H18O8	0.198151	-2.33533	Others	Others	--
N-benzoyl-2-aminoethyl-β-D-glucopyranoside	327.132	C15H21NO7	0.546168	-0.872583	Others	Others	--
Androsin	328.116	C15H20O8	0.269239	-1.89304	Others	Others	--
Pyridoxine-5'-O-glucoside	331.127	C14H21NO8	1.02836	0.0403444	Others	Vitamin	--
1-(sn-Glycero-3-phospho)-1D-myo-inositol	334.067	C9H19O11P	1.15185	0.203957	Others	Saccharides and Alcohols	--
D-Glucose 1,6-bisphosphate	339.996	C6H14O12P2	0.526072	-0.926667	Others	Saccharides and Alcohols	ko00500,ko01100
D-Fructose-1,6-biphosphate	339.996	C6H14O12P2	0.929438	-0.10557	Others	Saccharides and Alcohols	ko00400,ko00710,ko01100,ko01110,ko01200
D-Lactulose	342.116	C12H22O11	0.599575	-0.737987	Others	Saccharides and Alcohols	--
D-Sucrose*	342.116	C12H22O11	1.02995	0.0425725	Others	Saccharides and Alcohols	ko00052,ko00500,ko01100,ko01110,ko02010
Isomaltulose*	342.116	C12H22O11	0.87192	-0.197732	Others	Saccharides and Alcohols	--
Melibiose	342.116	C12H22O11	0.944396	-0.0825365	Others	Saccharides and Alcohols	ko00052,ko01100,ko02010
Galactinol	342.116	C12H22O11	0.999185	-0.00117587	Others	Saccharides and Alcohols	ko00052,ko01100
D-Trehalose*	342.116	C12H22O11	1.16858	0.224762	Others	Saccharides and Alcohols	ko00500,ko01100,ko01110,ko02010
Lactobiose	342.116	C12H22O11	0.744086	-0.426458	Others	Saccharides and Alcohols	ko00052,ko01100,ko02010
D-Maltose*	342.116	C12H22O11	0.855718	-0.224792	Others	Saccharides and Alcohols	--
4-Pyridoxic acid-O-glucoside	345.106	C14H19NO9	1.65193	0.724156	Others	Vitamin	--
Turanose	364.078	C12H21O11Na	1.04558	0.0643066	Others	Saccharides and Alcohols	--
2,3,5,4'-Tetrahydroxystilbene-2-O-D-xyloside	376.116	C19H20O8	1.88066	0.911243	Others	Stilbene	--
Riboflavin (Vitamin B2)	376.138	C17H20N4O6	1.16081	0.21513	Others	Vitamin	ko00740,ko01100,ko01110,ko02010
Benzyl β-primeveroside	402.152	C18H26O10	1.18219	0.241463	Others	Others	--
Tetrahydroxy-stilbene-O-glucoside	406.126	C20H22O9	0.459062	-1.12324	Others	Stilbene	--
2,4,6,4'-Tetrahydroxy-stilbene-2-O-glucoside	406.126	C20H22O9	0.403765	-1.30841	Others	Stilbene	--
E-3,4,5'-Trihydroxy-3'-glucosylstilbene	406.126	C20H22O9	0.754401	-0.406597	Others	Stilbene	--
Trehalose 6-phosphate	422.083	C12H23O14P	0.973239	-0.0391345	Others	Saccharides and Alcohols	ko00500,ko01100,ko01110
Isomangiferin	422.085	C19H18O11	0.871784	-0.197957	Others	Xanthone	--
Menatetrenone (Vitamin K2)	444.303	C31H40O2	0.903418	-0.146535	Others	Vitamin	--
Phylloquinone (Vitamin K1)	450.35	C31H46O2	0.994379	-0.00813287	Others	Vitamin	--
4-Ethylbenzaldehyde	134.073	C9H10O	1623.99	10.6653	Others	Others	--
3-Hydroxycinnamic Acid	164.047	C9H8O3	2.09597	1.06762	Others	Others	ko00360,ko01100
L-Fucose	164.068	C6H12O5	2.49891	1.3213	Others	Saccharides and Alcohols	ko00051,ko00520,ko01100
Raffinose*	504.169	C18H32O16	1.36525	0.449161	Others	Saccharides and Alcohols	ko00052,ko01100,ko02010
Methyl anisate	166.063	C9H10O3	3510.11	11.7773	Others	Others	--
D-Glucono-1,5-lactone	178.048	C6H10O6	1847.81	10.8516	Others	Saccharides and Alcohols	ko00030,ko01100,ko01110,ko01200
Inositol	180.063	C6H12O6	2.74554	1.45709	Others	Saccharides and Alcohols	ko00052,ko00053,ko00562,ko01100,ko01110,ko02010,ko04070
D-Fructose*	180.063	C6H12O6	2.02903	1.02079	Others	Saccharides and Alcohols	--
Dulcitol*	182.079	C6H14O6	2.00698	1.00503	Others	Saccharides and Alcohols	ko00052,ko01100
D-Sorbitol	182.079	C6H14O6	2.70788	1.43717	Others	Saccharides and Alcohols	ko00051,ko00052,ko01100,ko02010
D-Galactaric acid*	210.038	C6H10O8	2.06651	1.04719	Others	Saccharides and Alcohols	ko00053,ko01100
Dihydropinosylvin	214.099	C14H14O2	1645.11	10.684	Others	Stilbene	--
Icariside E5	522.21	C26H34O11	1.39272	0.477909	Others	Others	--
Dengibsin	226.063	C14H10O3	40.4536	5.3382	Others	Others	--
Resveratrol	228.079	C14H12O3	42.4853	5.40889	Others	Stilbene	ko00945,ko01110
Dihydropinosylvin methyl ether	228.115	C15H16O2	24337	14.5709	Others	Stilbene	--
Dihydroresveratrol	230.094	C14H14O3	12270.1	13.5829	Others	Stilbene	--
3,3',5-Trihydroxybibenzyl	230.094	C14H14O3	10229.8	13.3205	Others	Stilbene	--
3,4′-Dihydroxy-5-methoxystilbene	242.094	C15H14O3	33.5591	5.06863	Others	Stilbene	--
Batatasin Ⅲ	244.11	C15H16O3	22.0785	4.46457	Others	Others	--
Pterostilbene	256.11	C16H16O3	2085.33	11.0261	Others	Stilbene	ko00945
Dendrosinen B	260.105	C15H16O4	244.836	7.93567	Others	Others	--
Phenyl-β-D-glucopyranoside	270.11	C13H18O6	2.17278	1.11954	Others	Others	--
Gigantol(4',5-dihydroxy-3,3-dimethoxybibenzyl)	274.121	C16H18O4	31376.3	14.9374	Others	Others	--
N-(beta-D-Glucosyl)nicotinate	285.085	C12H15NO7	4.04222	2.01515	Others	Vitamin	--
3-Hydroxy-palmitic acid methyl ester	286.251	C17H34O3	2.56335	1.35803	Others	Others	--
Trans dehydrorosinone	288.209	C19H28O2	3.44669	1.78521	Others	Others	--
Tababiphenyl C	298.12	C18H18O4	4.0998	2.03555	Others	Others	--
N-Acetyl-D-glucosamine-1-phosphate	301.056	C8H16NO9P	2.75764	1.46343	Others	Saccharides and Alcohols	--
D-Panose*	504.169	C18H32O16	3.61871	1.85547	Others	Saccharides and Alcohols	--
Dehydrodiconiferyl alcohol-4-O-glucoside	520.194	C26H32O11	3.99394	1.99781	Others	Others	--
Denthyrsinone	522.131	C31H22O8	977.596	9.9331	Others	Others	--
Naphthalene, 2-nitro-	173.048	C10H7NO2	606.118	9.24346	Phenol	-	--
2-(1,1-Dimethylethyl)-6-(1-methylethyl)phenol	192.151	C13H20O	1090.37	10.0906	Phenol	-	--
1H-Inden-5-ol, 2,3-dihydro-	134.073	C9H10O	1.17355	0.230885	Phenol	-	--
Phenol, 4-butyl-	150.104	C10H14O	1.02828	0.0402277	Phenol	-	--
Acetaminophen	151.063	C8H9NO2	1.11727	0.159977	Phenol	-	--
1,3-Benzenediol, 5-pentyl-	180.115	C11H16O2	1.16173	0.216278	Phenol	-	--
Phenol, 3,4,5-trimethoxy-	184.074	C9H12O4	1.37525	0.459693	Phenol	-	--
2,5-bis(1,1-dimethylethyl)-1,4-Benzenediol	222.162	C14H22O2	1.26694	0.341349	Phenol	-	--
Phenol, 2,4-di-t-butyl-6-nitro-	251.152	C14H21NO3	1.0449	0.0633701	Phenol	-	--
Oxalic acid	89.995	C2H2O4	0.747904	-0.419075	Phenolic acids	Phenolic acids	ko00230,ko00630,ko01100
Benzamide	121.053	C7H7NO	0.809817	-0.304332	Phenolic acids	Phenolic acids	--
4-Hydroxybenzaldehyde	122.037	C7H6O2	1.53816	0.621203	Phenolic acids	Phenolic acids	ko01100
Cinnamaldehyde	132.058	C9H8O	0.991474	-0.0123531	Phenolic acids	Phenolic acids	ko00940,ko01100,ko01110
4-Aminobenzoic acid	137.048	C7H7NO2	0.465732	-1.10243	Phenolic acids	Phenolic acids	ko00790,ko01100
Anthranilic Acid	137.048	C7H7NO2	0.746111	-0.422538	Phenolic acids	Phenolic acids	ko00380,ko00400,ko00998,ko01058,ko01100,ko01110,ko01230
4-Hydroxybenzoic acid	138.032	C7H6O3	1.76926	0.823147	Phenolic acids	Phenolic acids	ko00130,ko00790,ko01100,ko01110
Salicylic acid	138.032	C7H6O3	1.1887	0.249379	Phenolic acids	Phenolic acids	ko00360,ko01100,ko01110,ko04075
2,5-Dihydroxybenzaldehyde*	138.032	C7H6O3	1.36386	0.447694	Phenolic acids	Phenolic acids	ko00350,ko01100
Protocatechualdehyde*	138.032	C7H6O3	1.48978	0.5751	Phenolic acids	Phenolic acids	ko00950
4-Nitrophenol	139.027	C6H5NO3	1.07357	0.10241	Phenolic acids	Phenolic acids	--
Phthalic anhydride	148.016	C8H4O3	0.915392	-0.127538	Phenolic acids	Phenolic acids	--
Cinnamic acid	148.052	C9H8O2	0.566286	-0.820398	Phenolic acids	Phenolic acids	ko00130,ko00360,ko00940,ko00998,ko01100,ko01110
3-Aminosalicylic acid	153.043	C7H7NO3	1.60639	0.683822	Phenolic acids	Phenolic acids	--
3,4-Dihydroxybenzoic acid (Protocatechuic acid)*	154.027	C7H6O4	1.89708	0.923778	Phenolic acids	Phenolic acids	ko01100,ko01110
2,5-Dihydroxybenzoic acid; Gentisic Acid*	154.027	C7H6O4	1.84442	0.88317	Phenolic acids	Phenolic acids	ko00350,ko01100
2,6-Dihydroxybenzoic acid	154.027	C7H6O4	1.21948	0.286272	Phenolic acids	Phenolic acids	--
4-MethoxycinnaMaldehyde	162.068	C10H10O2	1.355	0.438294	Phenolic acids	Phenolic acids	--
Caffeic aldehyde	164.047	C9H8O3	0.774364	-0.368915	Phenolic acids	Phenolic acids	ko00940,ko01110
α-Hydroxycinnamic Acid*	164.047	C9H8O3	1.68998	0.757008	Phenolic acids	Phenolic acids	ko00360,ko01100
Terephthalic acid	166.027	C8H6O4	0.469486	-1.09085	Phenolic acids	Phenolic acids	ko01100
1-(4-Methoxyphenyl)-1-propanol	166.099	C10H14O2	0.927442	-0.108671	Phenolic acids	Phenolic acids	--
2-Amino-3-methoxybenzoic acid	167.058	C8H9NO3	1.01103	0.0158315	Phenolic acids	Phenolic acids	ko00380
3,4-Dihydroxybenzeneacetic acid	168.042	C8H8O4	1.90012	0.926092	Phenolic acids	Phenolic acids	ko00350,ko01100
Homogentisic acid	168.042	C8H8O4	1.71992	0.782346	Phenolic acids	Phenolic acids	ko00130,ko00350,ko01100
Gallacetophenone	168.042	C8H8O4	0.95576	-0.0652803	Phenolic acids	Phenolic acids	--
4-Methoxycinnamic acid*	178.063	C10H10O3	0.539989	-0.888999	Phenolic acids	Phenolic acids	--
p-Coumaric acid methyl ester*	178.063	C10H10O3	1.13178	0.178592	Phenolic acids	Phenolic acids	--
Methyl 3-(4-hydroxyphenyl)propionate	180.079	C10H12O3	1.62053	0.696468	Phenolic acids	Phenolic acids	--
Coniferyl alcohol	180.079	C10H12O3	0.680912	-0.55446	Phenolic acids	Phenolic acids	ko00940,ko00998,ko01100,ko01110
4-Methoxyphenylpropionic acid	180.079	C10H12O3	0.747063	-0.420698	Phenolic acids	Phenolic acids	--
Dihydrocaffeic acid	182.058	C9H10O4	1.05217	0.0733647	Phenolic acids	Phenolic acids	ko00350
Isoferulic Acid*	194.058	C10H10O4	0.333052	-1.58618	Phenolic acids	Phenolic acids	--
Ferulic acid*	194.058	C10H10O4	0.336348	-1.57197	Phenolic acids	Phenolic acids	ko00940,ko01100,ko01110
Methyl caffeate	194.058	C10H10O4	1.61947	0.695524	Phenolic acids	Phenolic acids	--
4-Hydroxy-3-methoxymandelate	198.053	C9H10O5	0.781504	-0.355675	Phenolic acids	Phenolic acids	ko00350,ko01100
4-Hydroxy-3,5-diisopropylbenzaldehyde	206.131	C13H18O2	0.576342	-0.795004	Phenolic acids	Phenolic acids	--
2,6-Di-tert-butylphenol*	206.167	C14H22O	0.834222	-0.261496	Phenolic acids	Phenolic acids	--
2,4-Di-Tert-Butylphenol*	206.167	C14H22O	1.00894	0.0128339	Phenolic acids	Phenolic acids	--
3,4-Dimethoxycinnamic acid	208.074	C11H12O4	0.221805	-2.17263	Phenolic acids	Phenolic acids	--
Methyl ferulate	208.074	C11H12O4	0.487833	-1.03554	Phenolic acids	Phenolic acids	--
Sinapyl alcohol	210.089	C11H14O4	1.20564	0.269802	Phenolic acids	Phenolic acids	ko00940,ko01100,ko01110
Methyl 3-(3-hydroxy-4-methoxyphenyl)propanoate	210.089	C11H14O4	1.00637	0.00915647	Phenolic acids	Phenolic acids	--
Sinapic acid	224.068	C11H12O5	1.68001	0.748472	Phenolic acids	Phenolic acids	ko00940,ko01100,ko01110
3,4,5-Trimethoxybenzoic acid methyl ester	226.084	C11H14O5	0.943174	-0.0844043	Phenolic acids	Phenolic acids	--
Benzoylmalic acid	238.048	C11H10O6	0.241917	-2.04742	Phenolic acids	Phenolic acids	--
Methyl sinapate	238.084	C12H14O5	1.18274	0.242128	Phenolic acids	Phenolic acids	--
2-Feruloyl-sn-glycerol	268.095	C13H16O6	0.386846	-1.37017	Phenolic acids	Phenolic acids	--
Arbutin	272.09	C12H16O7	1.43262	0.518661	Phenolic acids	Phenolic acids	ko00010
Diisobutyl phthalate*	278.152	C16H22O4	0.893299	-0.162786	Phenolic acids	Phenolic acids	--
Dibutyl phthalate*	278.152	C16H22O4	0.910891	-0.134649	Phenolic acids	Phenolic acids	--
Cinnamoyltartaric acid	280.058	C13H12O7	0.252407	-1.98618	Phenolic acids	Phenolic acids	--
p-Coumaroylmalic acid	280.058	C13H12O7	0.333875	-1.58262	Phenolic acids	Phenolic acids	--
Vnilloylmalic acid	284.053	C12H12O8	0.170034	-2.55611	Phenolic acids	Phenolic acids	--
Salicin	286.105	C13H18O7	0.135473	-2.88392	Phenolic acids	Phenolic acids	ko00010
1-O-Salicyl-D-glucose	300.084	C13H16O8	1.57923	0.659226	Phenolic acids	Phenolic acids	--
4-O-Glucosyl-4-hydroxybenzoic acid	300.084	C13H16O8	1.54848	0.63085	Phenolic acids	Phenolic acids	--
Salicylic acid-2-O-glucoside	300.085	C13H16O8	1.22175	0.288945	Phenolic acids	Phenolic acids	--
Glucosyloxybenzoic acid	300.085	C13H16O8	1.39134	0.476471	Phenolic acids	Phenolic acids	--
Salidroside	300.121	C14H20O7	1.57014	0.650891	Phenolic acids	Phenolic acids	ko00350,ko01100
Doitungbiphenyl A	300.135	C18H20O4	1.79567	0.844524	Phenolic acids	Phenolic acids	--
4-O-Glucosyl-3,4-dihydroxybenzyl alcohol	302.1	C13H18O8	1.2497	0.321582	Phenolic acids	Phenolic acids	--
Feruloylmalic acid	310.069	C14H14O8	0.0474155	-4.3985	Phenolic acids	Phenolic acids	--
Mandelic acid-β-glucoside	314.1	C14H18O8	1.27697	0.352722	Phenolic acids	Phenolic acids	--
Protocatechuic acid-4-O-glucoside*	316.079	C13H16O9	1.40788	0.493527	Phenolic acids	Phenolic acids	--
1-O-Gentisoyl-D-glucoside*	316.079	C13H16O9	1.5205	0.604543	Phenolic acids	Phenolic acids	--
3,4-dihydroxyphenylethanol-β-D-glucopyranoside	316.116	C14H20O8	1.20734	0.27183	Phenolic acids	Phenolic acids	--
5-(2-Hydroxyethyl)-2-O-glucosylphenol	316.116	C14H20O8	1.19093	0.252087	Phenolic acids	Phenolic acids	--
Trans-5-O-(p-Coumaroyl)shikimate	320.09	C16H16O7	1.8875	0.916479	Phenolic acids	Phenolic acids	ko00940,ko00941,ko00945,ko01100,ko01110
p-Coumaric acid-4-O-glucoside	326.1	C15H18O8	0.292723	-1.77239	Phenolic acids	Phenolic acids	--
1-O-[(E)-p-Cumaroyl]-D-glucose	326.1	C15H18O8	0.257556	-1.95704	Phenolic acids	Phenolic acids	--
1-O-p-Coumaroyl-β-D-glucose	326.1	C15H18O8	0.318387	-1.65115	Phenolic acids	Phenolic acids	--
Raspberryketone glucoside	326.137	C16H22O7	0.862489	-0.213422	Phenolic acids	Phenolic acids	--
Demethyl coniferin	328.116	C15H20O8	0.762071	-0.392004	Phenolic acids	Phenolic acids	--
3-Hydroxy-4-isopropylbenzylalcohol-3-O-glucoside	328.152	C16H24O7	1.21456	0.280432	Phenolic acids	Phenolic acids	--
Vanillic acid-4-O-glucoside	330.095	C14H18O9	1.05538	0.0777614	Phenolic acids	Phenolic acids	--
2,4,6-trihydroxy-acetophenone-4-O-b-D-glucopyranoside	330.095	C14H18O9	0.99048	-0.0138005	Phenolic acids	Phenolic acids	--
2,4,6-trihydroxy-acetophenone-6-O-b-D-glucopyranoside	330.095	C14H18O9	0.987388	-0.0183114	Phenolic acids	Phenolic acids	--
3,4,5-Trimethoxyphenyl-1-O-Glucoside	330.131	C15H22O8	0.948611	-0.0761115	Phenolic acids	Phenolic acids	--
1-O-galloyl-β-D-glucose	332.074	C13H16O10	1.8204	0.864259	Phenolic acids	Phenolic acids	--
Koaburaside	332.111	C14H20O9	1.52838	0.612004	Phenolic acids	Phenolic acids	--
2-(3,4-dihydroxyphenyl)ethanediol 1-O-β-D-glucopyranoside	332.111	C14H20O9	1.44573	0.531794	Phenolic acids	Phenolic acids	--
5-O-Caffeoylshikimic acid	336.085	C16H16O8	0.498391	-1.00465	Phenolic acids	Phenolic acids	ko00940,ko00941,ko00945,ko01100,ko01110
3-O-p-Coumaroylquinic acid*	338.1	C16H18O8	0.652788	-0.615314	Phenolic acids	Phenolic acids	--
5-O-p-Coumaroylquinic acid*	338.1	C16H18O8	0.399257	-1.32461	Phenolic acids	Phenolic acids	ko00940,ko00941,ko00945,ko01110
1-O-p-Coumaroylquinic acid	338.1	C16H18O8	0.000808928	-10.2717	Phenolic acids	Phenolic acids	--
Sinapoyl malate	340.079	C15H16O9	0.791855	-0.336692	Phenolic acids	Phenolic acids	ko00940
1-O-[(E)-Caffeoyl]-D-glucose	342.095	C15H18O9	0.298057	-1.74634	Phenolic acids	Phenolic acids	--
1-O-Caffeoyl-β-D-glucose	342.095	C15H18O9	0.477739	-1.0657	Phenolic acids	Phenolic acids	--
Vanillic Acid-4-O-Glucuronide	342.095	C15H18O9	0.435833	-1.19815	Phenolic acids	Phenolic acids	--
6-O-Caffeoyl-D-glucose	342.096	C15H18O9	0.214203	-2.22295	Phenolic acids	Phenolic acids	--
Coniferin	342.131	C16H22O8	0.433498	-1.2059	Phenolic acids	Phenolic acids	ko00940
Neochlorogenic acid (5-O-Caffeoylquinic acid)	354.095	C16H18O9	3.38877e-05	-14.8489	Phenolic acids	Phenolic acids	--
Cryptochlorogenic acid (4-O-Caffeoylquinic acid)	354.095	C16H18O9	0.609484	-0.714339	Phenolic acids	Phenolic acids	--
6-O-Feruloyl-D-glucose	356.111	C16H20O9	0.290361	-1.78408	Phenolic acids	Phenolic acids	--
1-O-Feruloyl-β-D-glucose	356.111	C16H20O9	0.390578	-1.35632	Phenolic acids	Phenolic acids	--
4-O-β-D-glucopyranosylferulic acid	356.111	C16H20O9	0.316922	-1.6578	Phenolic acids	Phenolic acids	--
Glucosyringic Acid	360.106	C15H20O10	1.21638	0.282589	Phenolic acids	Phenolic acids	--
Chlorogenic acid methyl ester	368.111	C17H20O9	0.304404	-1.71594	Phenolic acids	Phenolic acids	--
Feruloyl syringic acid	374.1	C19H18O8	1.42838	0.514379	Phenolic acids	Phenolic acids	--
D-Threo-guaiacylglycerol-7-O-β-D-glucoside	376.137	C16H24O10	0.896248	-0.15803	Phenolic acids	Phenolic acids	--
4-O-Glucosyl-sinapate	386.121	C17H22O10	1.85875	0.894335	Phenolic acids	Phenolic acids	--
1-O-Glucosyl sinapate	386.121	C17H22O10	1.75954	0.815199	Phenolic acids	Phenolic acids	--
1-O-Sinapoyl-D-glucose	386.122	C17H22O10	1.78285	0.834188	Phenolic acids	Phenolic acids	ko00940
5'-Glucosyloxyjasmanic acid	388.174	C18H28O9	1.20448	0.268406	Phenolic acids	Phenolic acids	--
Bis(2-ethylhexyl)phthalate	390.277	C24H38O4	0.969349	-0.0449117	Phenolic acids	Phenolic acids	--
Diisooctyl Phthalate	390.277	C24H38O4	0.927294	-0.108901	Phenolic acids	Phenolic acids	--
Benzyl-(2''-O-xylosyl)glucoside	402.153	C18H26O10	1.15433	0.207059	Phenolic acids	Phenolic acids	--
Caffeoyl(p-Hydroxybenzoyl)tartaric acid	432.069	C20H16O11	0.412478	-1.27761	Phenolic acids	Phenolic acids	--
Benzyl-(2''-O-glucosyl)glucoside	432.163	C19H28O11	0.587089	-0.76835	Phenolic acids	Phenolic acids	--
6-O-Caffeoylarbutin	434.121	C21H22O10	0.633599	-0.658358	Phenolic acids	Phenolic acids	--
Anthranilate-1-O-Sophoroside	461.153	C19H27NO12	1.01596	0.0228476	Phenolic acids	Phenolic acids	--
Chicoric Acid	474.08	C22H18O12	1.25561	0.328393	Phenolic acids	Phenolic acids	--
3-O-p-Coumaroylshikimic acid-O-glucoside	482.142	C22H26O12	0.958987	-0.0604172	Phenolic acids	Phenolic acids	--
Feruloylferuloyltartaric acid	502.111	C24H22O12	0.508432	-0.975874	Phenolic acids	Phenolic acids	--
Di-O-Glucosylquinic acid	516.169	C19H32O16	0.524142	-0.93197	Phenolic acids	Phenolic acids	--
6'-O-Feruloyl-D-sucrose	518.164	C22H30O14	0.936446	-0.0947331	Phenolic acids	Phenolic acids	--
Rosmarinic acid-3'-O-glucoside	522.137	C24H26O13	1.59709	0.675444	Phenolic acids	Phenolic acids	--
Feruloylsinapoyltartaric acid	532.122	C25H24O13	0.856093	-0.224161	Phenolic acids	Phenolic acids	--
Phenol	94.042	C6H6O	36.516	5.19046	Phenolic acids	Phenolic acids	ko00350,ko01100
5-Hydroxymethylfurfural	126.032	C6H6O3	2.68512	1.42499	Phenolic acids	Phenolic acids	--
4-Methoxybenzaldehyde	136.052	C8H8O2	112579	16.7806	Phenolic acids	Phenolic acids	--
2-Methoxy-4-ethenylphenol	150.068	C9H10O2	5070.3	12.3079	Phenolic acids	Phenolic acids	--
Vanillin	152.047	C8H8O3	3.07114	1.61877	Phenolic acids	Phenolic acids	ko00998,ko01100,ko01110
p-Coumaric acid	164.047	C9H8O3	4.63565	2.21277	Phenolic acids	Phenolic acids	ko00130,ko00350,ko00940,ko00950,ko00998,ko01100,ko01110
Isoeugenol	164.084	C10H12O2	6368.89	12.6368	Phenolic acids	Phenolic acids	ko00940
2-(Formylamino)benzoic acid	165.043	C8H7NO3	4.23798	2.08338	Phenolic acids	Phenolic acids	ko00380,ko01100
2,6-Dimethoxybenzaldehyde	166.063	C9H10O3	4.28856	2.10049	Phenolic acids	Phenolic acids	--
Coniferaldehyde	178.063	C10H10O3	3.0552	1.61127	Phenolic acids	Phenolic acids	ko00940,ko01100,ko01110
Syringaldehyde; 4-Hydroxy-3,5-Dimethoxybenzaldehyde	182.058	C9H10O4	3.96753	1.98824	Phenolic acids	Phenolic acids	--
2,6-Dimethoxybenzoic acid	182.058	C9H10O4	2.2775	1.18745	Phenolic acids	Phenolic acids	--
Dihydroferulic Acid	196.074	C10H12O4	2.08434	1.05959	Phenolic acids	Phenolic acids	--
Syringic acid	198.053	C9H10O5	3.1909	1.67396	Phenolic acids	Phenolic acids	--
Sinapinaldehyde	208.074	C11H12O4	5.73135	2.51887	Phenolic acids	Phenolic acids	ko00940,ko01100,ko01110
3,4'-Dihydroxy-3',5'-dimethoxypropiophenone	226.084	C11H14O5	3.9954	1.99834	Phenolic acids	Phenolic acids	--
3,4,5-Trimethoxycinnamic acid	238.084	C12H14O5	2.84056	1.50617	Phenolic acids	Phenolic acids	--
4'-Methoxyresveratrol	242.094	C15H14O3	11.4938	3.52278	Phenolic acids	Phenolic acids	--
Isoacteoside	624.205	C29H36O15	0.341605	-1.5496	Phenolic acids	Phenolic acids	--
Tristin	260.105	C15H16O4	17.1753	4.10227	Phenolic acids	Phenolic acids	--
3,4-Dihydroxy-5,4'-dimethoxybibenzyl	274.121	C16H18O4	162.749	7.3465	Phenolic acids	Phenolic acids	--
Plantamajoside	640.2	C29H36O16	0.612347	-0.707578	Phenolic acids	Phenolic acids	--
4,4'-Dihydroxy-3,5-dimethoxybibenzyl	274.121	C16H18O4	127.393	6.99315	Phenolic acids	Phenolic acids	--
3-Hydroxy-5-Methylphenol-1-O-Glucoside	286.105	C13H18O7	5.83436	2.54457	Phenolic acids	Phenolic acids	--
3'-Hydroxy-3,4,5-trimethoxybibenzyl	288.136	C17H20O4	60.287	5.91378	Phenolic acids	Phenolic acids	--
Dendrocandin C	290.115	C16H18O5	74.0042	6.20954	Phenolic acids	Phenolic acids	--
Moscatilin (4,4'-Dihydroxy-3,3',5-Trimethoxybibenzyl)	304.131	C17H20O5	27052.2	14.7235	Phenolic acids	Phenolic acids	--
Methyl salicylate-2-O-glucoside	314.1	C14H18O8	2.48432	1.31285	Phenolic acids	Phenolic acids	--
Echinacoside	786.258	C35H46O20	0.413483	-1.2741	Phenolic acids	Phenolic acids	--
1-O-Vanilloyl-D-Glucose	330.095	C14H18O9	24057.4	14.5542	Phenolic acids	Phenolic acids	--
5-Glucosyloxy-2-Hydroxybenzoic acid methyl ester	330.095	C14H18O9	24157	14.5602	Phenolic acids	Phenolic acids	--
1-O-(3,4-Dihydroxy-5-methoxy-benzoyl)-glucoside	346.09	C14H18O10	4.58998	2.19849	Phenolic acids	Phenolic acids	--
Ferulic acid-4-O-glucoside	356.111	C16H20O9	5.58816	2.48237	Phenolic acids	Phenolic acids	--
Syringin	372.142	C17H24O9	2.66794	1.41573	Phenolic acids	Phenolic acids	ko00940
5-O-p-Coumaroylshikimic acid O-glucoside	482.142	C22H26O12	2.97227	1.57157	Phenolic acids	Phenolic acids	--
Dehydrodiconiferyl alcohol-gamma'-O-glucoside	520.194	C26H32O11	3.90904	1.96681	Phenolic acids	Phenolic acids	--
Furanofructosyl-α-D-(3-mustard acyl)glucoside	548.174	C23H32O15	7.91413	2.98443	Phenolic acids	Phenolic acids	--
6′-O-Sinapoylsucrose	548.174	C23H32O15	10.0701	3.33201	Phenolic acids	Phenolic acids	--
Disinapoyl glucoside	592.179	C28H32O14	3.29346	1.7196	Phenolic acids	Phenolic acids	--
3,4,5-Tricaffeoylquinic acid	678.158	C34H30O15	10.5535	3.39964	Phenolic acids	Phenolic acids	--
2,6-Dimethoxy-1,4-benzoquinone	168.042	C8H8O4	0.969506	-0.0446787	Quinones	Quinones	--
Chrysophanol-9-anthrone	240.079	C15H12O3	0.996111	-0.00562098	Quinones	Quinones	--
Hircinol	242.094	C15H14O3	1.55291	0.634978	Quinones	PhenAnthraquinones	--
4-Methoxy-9,10-dihydrophenanthrene-2,5-diphenol	242.094	C15H14O3	1.76019	0.815735	Quinones	PhenAnthraquinones	--
Coelonin	242.094	C15H14O3	1.65839	0.72978	Quinones	PhenAnthraquinones	--
Ephemeranthoquinone B	256.074	C15H12O4	1.10515	0.144241	Quinones	PhenAnthraquinones	--
2,5-Dihydroxy-4,9-dimethoxylphenanthrene	270.089	C16H14O4	1.13227	0.179212	Quinones	PhenAnthraquinones	--
Ephemeranthol B; Flavanthridin	272.105	C16H16O4	1.17568	0.233492	Quinones	PhenAnthraquinones	--
Rhein	284.024	C15H8O6	0.484364	-1.04584	Quinones	Anthraquinone	--
4,8-Dihydroxy Naphthol-1-O-glucoside	338.1	C16H18O8	0.553665	-0.852913	Quinones	Quinones	--
Rhein-8-O-glucoside	446.085	C21H18O11	0.261726	-1.93387	Quinones	Anthraquinone	--
Physcion-8-O-glucoside	446.121	C22H22O10	0.662435	-0.594149	Quinones	Anthraquinone	--
HydroxyAloe-emodin-8-O-glucoside	448.101	C21H20O11	0.798469	-0.324691	Quinones	Anthraquinone	--
4,5-Dihydroxy-2-methoxy-9,10-dihydrophenanthrene	242.094	C15H14O3	11.008	3.46048	Quinones	PhenAnthraquinones	--
Lusianthridin	242.094	C15H14O3	4.72705	2.24094	Quinones	PhenAnthraquinones	--
9,10-Dihydro-2-methoxy-4,5-phenanthrenediol	242.094	C15H14O3	2.01876	1.01347	Quinones	PhenAnthraquinones	--
Cymbinodin A	254.058	C15H10O4	3289.63	11.6837	Quinones	PhenAnthraquinones	--
1,2,4-Trihydroxyanthraquinone	256.037	C14H8O5	13121.3	13.6796	Quinones	Anthraquinone	--
Aloe-Emodin-9-Anthrone	256.074	C15H12O4	2.50463	1.3246	Quinones	Quinones	--
Nudol	270.089	C16H14O4	97.4421	6.60647	Quinones	PhenAnthraquinones	--
2,7-Dihydroxy-3,4,6-trimethoxyphenanthrene	272.105	C16H16O4	13935.2	13.7664	Quinones	PhenAnthraquinones	--
Erianthridin	272.105	C16H16O4	4609.52	12.1704	Quinones	PhenAnthraquinones	--
Ephemeranthol A	272.105	C16H16O4	318919	18.2828	Quinones	PhenAnthraquinones	--
Denbinobin	284.068	C16H12O5	39.8768	5.31748	Quinones	PhenAnthraquinones	--
7-Hydroxy-5,6-dimethoxy-1,4-phenanthrenequinone	284.068	C16H12O5	5.27919	2.40032	Quinones	PhenAnthraquinones	--
3-hydroxy-1,2-dimethoxy-anthraquinone	284.068	C16H12O5	2349.63	11.1982	Quinones	Anthraquinone	--
6-Hydroxy-Emodin	286.048	C15H11O6	5.45027	2.44633	Quinones	Anthraquinone	--
Cholesterol	386.355	C27H46O	0.781764	-0.355195	Steroids	Steroid	ko00100,ko01100
Sulfamide	95.999	H4N2O2S	1.08406	0.116441	Sulfur compounds	-	--
2-Propanone, 1-(5-methyl-3H-1,2-dithiol-3-ylidene)-	172.002	C7H8OS2	2.09948	1.07003	Sulfur compounds	-	--
Gallic acid	170.022	C7H6O5	1.54402	0.626687	Tannins	Tannin	--
Gallic acid-4-O-glucoside	332.074	C13H16O10	1.59877	0.676959	Tannins	Tannin	--
2-O-Galloyl-D-glucose	332.075	C13H16O10	1.14169	0.191168	Tannins	Tannin	--
Ellagic acid-4-O-Xyloside	434.049	C19H14O12	1.03682	0.0521619	Tannins	Tannin	--
6-O-Galloyl-D-glucose	332.074	C13H16O10	3.61834	1.85533	Tannins	Tannin	--
3-O-Galloyl-D-glucose	332.075	C13H16O10	3.60637	1.85055	Tannins	Tannin	--
2,7-Dimethyl-2,4-diene-deca-α,x-diacid 8-O-β-glucoside	404.168	C18H28O10	2.28173	1.19013	Tannins	Tannin	--
Elemol	222.198	C15H26O	1.13098	0.177579	Terpenoids	Sesquiterpenoids	--
6,9-Dihydroxy-7-megastigmen-3-one	226.157	C13H22O3	1.0799	0.110899	Terpenoids	Sesquiterpenoids	--
Confertifoline	234.162	C15H22O2	0.892227	-0.164517	Terpenoids	Sesquiterpenoids	--
Dehydroabietic acid	300.209	C20H28O2	0.99382	-0.00894369	Terpenoids	Ditepenoids	--
catechol	316.204	C20H28O3	0.884024	-0.177842	Terpenoids	Ditepenoids	--
Cafestol	316.204	C20H28O3	0.999713	-0.00041371	Terpenoids	Ditepenoids	--
Hispanolone	318.219	C20H30O3	1.19666	0.259008	Terpenoids	Ditepenoids	--
Aucubin	346.126	C15H22O9	0.284385	-1.81408	Terpenoids	Sesquiterpenoids	--
Sweroside	358.126	C16H22O9	1.61932	0.695389	Terpenoids	Sesquiterpenoids	--
Geniposide	388.137	C17H24O10	1.11737	0.16011	Terpenoids	Monoterpenoids	--
Gardenoside	404.132	C17H24O11	1.51606	0.60033	Terpenoids	Monoterpenoids	--
Ixerisoside D	408.178	C21H28O8	0.390696	-1.35588	Terpenoids	Sesquiterpenoids	--
Dendroside G	446.215	C21H34O10	1.97559	0.982287	Terpenoids	Sesquiterpenoids	--
(23S)-3β-hydroxydammara-21-oic acid 21,23-lactone	456.36	C30H48O3	0.661756	-0.595629	Terpenoids	Triterpene	--
24,30-Dihydroxy-12(13)-enolupinol	456.36	C30H48O3	0.926989	-0.109376	Terpenoids	Triterpene	--
Betulinic acid	456.36	C30H48O3	0.340796	-1.55302	Terpenoids	Triterpene	--
6'-O-D-Glucosylsweroside	520.152	C22H32O14	1.87953	0.910372	Terpenoids	Sesquiterpenoids	--
.gamma.-Terpinene	136.125	C10H16	1.02291	0.0326731	Terpenoids	-	--
3-Carene	136.125	C10H16	1.29884	0.377228	Terpenoids	-	--
α-thujene	136.125	C10H16	1.08128	0.112746	Terpenoids	-	--
p-Mentha-1,8-dien-7-ol	152.12	C10H16O	0.789644	-0.340725	Terpenoids	-	ko00902,ko00903,ko01110
L-.alpha.-Terpineol	154.136	C10H18O	1.12654	0.1719	Terpenoids	-	ko00902,ko01100,ko01110
4-Hexen-1-ol, 5-methyl-2-(1-methylethenyl)-, (R)-	154.136	C10H18O	0.9736	-0.0385989	Terpenoids	-	--
2-Methylisoborneol	168.151	C11H20O	0.949887	-0.0741725	Terpenoids	-	--
1, 1, 5-Trimethyl-1, 2-dihydronaphthalene	172.125	C13H16	1.7643	0.819097	Terpenoids	-	--
2-Buten-1-one, 1-(2,6,6-trimethyl-1,3-cyclohexadien-1-yl)-, (E)-	190.136	C13H18O	1.33179	0.413372	Terpenoids	-	--
3-Buten-2-one, 4-(2,6,6-trimethyl-1-cyclohexen-1-yl)-	192.151	C13H20O	0.724361	-0.46522	Terpenoids	-	--
Elemene isomer	204.188	C15H24	1.43988	0.525953	Terpenoids	-	--
Ferruginol	286.23	C20H30O	2.10772	1.07568	Terpenoids	Ditepenoids	ko00904,ko01110
Dihydro-cis-.alpha.-copaene-8-ol	222.198	C15H26O	0.715868	-0.482234	Terpenoids	-	--
Dendromoniliside E	544.21	C32H32O8	3021.41	11.561	Terpenoids	Sesquiterpenoids	--
(E)-.beta.-Famesene	204.188	C15H24	2.29673	1.19958	Terpenoids	-	ko00909
4-Oxo-β-ionone	206.131	C13H18O2	3.80976	1.9297	Terpenoids	-	--
Isophytol	296.308	C20H40O	2.64123	1.40121	Terpenoids	-	--
Phytol	296.308	C20H40O	2.59542	1.37597	Terpenoids	-	--

## Sheet: Table S3
Table S3. Primers used in this study.
Gene	Primer	Primer Sequence (5’-3’)
*ITS	ITS6	GAAGGTGAAGTCGTAACAAGG
	ITS4	TCCTCCGCTTATTGATATGC
*β-tubulin2	Bt2a	GGTAACCAAATCGGTGCTGCTTTC
	Bt2b	ACCCTCAGTGTAGTGACCCTTGGC
*GAPDH	GDF1	GCCGTCAACGACCCCTTCATTG
	GDR1	GGGTGGAGTCGTACTTGAGCATGT
*ACT	ACT-512F	ATGTGCAAGGCCGGTTTCGC
	ACT-783R	TACGAGTCCTTCTGGCCCAT
*CAL	CL1	GAATTCAAGGAGGCCTTCTCCC
	CL2	TTATYTCCATCATGATTTCTTGACC
*CHS1	CHS-79F	TGGGGCAAGGATGCTTGGAAGAAG
	CHS-354R	TGAAGAACCATCAAGTAGTTTGAGG
DcaPLA	F	GATAATGAGCTTACATATA
	R	TTCAACTATAGGCCTTTGTG
PLA2	F	ACCTCGAAGCGGAACGTGGCTA
	R	CCTTTACTGGAGTCGGGGATAGCAACT
*The primers were described in the previous report.
Cannon, P. F., Damm, U., Johnston, P. R., & Weir, B. S. (2012). Colletotrichum – current status and future directions. Studies in Mycology, 73(1), 181–213.

## Sheet: Table S4
Table S4.Amplification sequence of C. fructicola by ITS,β-tubulin,GAPDH,ACT,CAL,and CHS1.
ITS amplification sequences
GCGAGGGGGAGCGGAGGGACATTACTGAGTTTACGCTCTATAACCCTTTGTGAACATACCTATAACTGTTGCTTCGGCGGGTAGGGTCTCCGCGACCCTCCCGGCCTCCCGCCTCCGGGCGGGTCGGCGCCCGCCGGAGGATAACCAAACTCTGATTTAACGACGTTTCTTCTGAGTGGTACAAGCAAATAATCAAAACTTTTAACAACGGATCTCTTGGTTCTGGCATCGATGAAGAACGCAGCGAAATGCGATAAGTAATGTGAATTGCAGAATTCAGTGAATCATCGAATCTTTGAACGCACATTGCGCCCGCCAGCATTCTGGCGGGCATGCCTGTTCGAGCGTCATTTCAACCCTCAAGCTCTGCTTGGTGTTGGGGCCCTACAGCTGATGTAG…
β-tubulin amplification sequences
GGTTAGATGAAAAACGCCGACGACCCGGCAATATATACTTGCGAGGACGGCAGATGTTGACGATAGAGTAGGCAAAACATTTCTGGCGAGCACGGCCTCGACAGCAATGGAGTGTATGTCATGCCCCTTATCTGGCCACATTGGTGGTTGACCGCTAAACTCGAACAGCTACAACGGCACCTCTGAGCTCCAGCTCGAGCGCATGAGCGTCTACTTCAACGAAGTTTGTTACCTTATAGCCCCCAGAGTGCAAGATAAACATATTGACGAGTACTGACCTTCGCTCCTACCCAGGCTTCCGGCAACAAGTACGTGCCCCGTGCCGTCCTCGTCGATTTGGAGCCCGGTACCATGGACGCCGTCCGTGCCGGTCCTTTCGGCCAGCTCTTCCGCCCCGAC…
GAPDH amplification sequences
GAAAGCTGCGATATCACCCCACCTACCCCTCCAAACTCGCCATGACTTCGCATCCATCCCCACCACCACCACCGCTGTCATCTACATCTCGCCACCCGCGTTTGGTAAATAAGAAGGCCGTCATGAATGGAGGCCAATTGAAACCATGGGTCGGGACGGCCGGACACATGCTATCACTCATATCAGCCCCATCTGTCGCATTTACTGACTCGCTCTTCACAGGCCTACATGCTCAAGTAGGAACTCCACCCGA
ACT amplification sequences
GTACTGAATCATGTTAGATCGCGGCGCGGAGGGCGGAAATTACCGCAGCGAGGGCGAGAAGCAGACATACCCATGGTGGCGAGGGCGCCCGACGATGGAGGCTACGTGGTGGTTAGCATCGACAGCACACGCCGATTGATGACCGCAAATCTGAGTACCCCCTGAAGAGGCGGGTTGCGGTCTGCGGTCTGCGGATGGGGGGACTTACGGAAGACAGCTCTGGGCGCATCGTCACCGGCGAAACCGCC
CAL amplification sequences
CGTTTTTTACCGACTTGTTAGTGCCATGACGCATACCAATCAATCGACACTCACAGTCAATGCGTCCATCGCCGTCCTGATCGGCCTCGCGAATCATCTCGTCAACCTCGTCGTCGGTAAGCTTCTCACCAATGGAGGTCATGACGTGACGCAACTCGGCGGCGGAGATGAAGCCGTTGTTGTCGCGGTCAAAGACCTACTCAGAGTCAACATCAATCGCAGCGGAAAAGCACCGTCGTAGCCAACCTTGAAAGCCTCGCGAATCTCCTCTTCGGAGTCTGTATCCTTCATCTTGCGGGCCATCATAGTCAGGAACTCTGGAGGACAGTCAGCGGGCCTGTATTGTGTGACGCAGGATTCCGCGTGTCCACCTACCGGGAAAGTCGATGGTGCCGTTGT…
CHS1 amplification sequences
TGTCTGGTCTCTCTTCAGCAGACAGCATCTGAACGGGCTGCTGCTTTAGGAACCAAGGAGACAACGTCGTTCTTGATCGTCATGCCGACCTGGGTCGTGTATTCGTAAATGTGGGCGGTGACATCCTTGCTGTTGACCTGTTGCTTCGCGATACCCTCCTGGTACACACCCATACCGGCCAGCAGTGCTCTTGTTCGCGGGTTGATCTTGGCACGACCGTCGCTGACAACACAGACGACAATCTTCTTCCAAGCACCATTTGCCCCAAAA
