# Supplementary material for: Integrated transcriptomic and metabolomic analyses reveal flavonoid and lipid metabolic reprogramming in Dendrobiumofficinale during Colletotrichum fructicola-induced anthracnose
Source: PeerJ. 2026 Jan 15;14:e20563. doi: 10.7717/peerj.20563 (PMC12812277; doi:10.7717/peerj.20563)
Supplement: Supplemental Information 3 — A total of 1,275 metabolites were detected by nontargeted metabolomics analysis. The largest number of metabolites were classified into flavonoids, phenolic acids, and lipids. [file peerj-14-20563-s003.xlsx]

## Sheet: Sheet1
Index	Platform	Ion mode	Q1 (Da)	Q3 (Da)	Molecular Weight (Da)	Formula	Ionization model	RI	NIST_RI	Compounds	Class I	Class II	CAS	Level	Match factor	mix01	mix02	mix03	M-CK1	M-CK2	M-CK3	M-IN1	M-IN2	M-IN3	cpd_ID	kegg_map
pme3200	UPLC-MS/MS	Positive	74	57	73.064	C2H7N3	[M+H]+	-	-	1-methylguanidine	Nucleotides and derivatives	Nucleotides and derivatives	471-29-4	2	-	36928	41733	42643	28696	34286	39190	22685	21321	35523	C02294	--
mws0217	UPLC-MS/MS	Positive	76.04	29.99	75.032	C2H5NO2	[M+H]+	-	-	L-Glycine	Amino acids and derivatives	Amino acids and derivatives	56-40-6	3	-	6596	8782.5	5889.9	16158	13828	5869.3	2993.4	2865.9	4440.8	C00037	ko00230,ko00260,ko00310,ko00440,ko00460,ko00480,ko00630,ko00730,ko00860,ko00970,ko01100,ko01110,ko01200,ko01230,ko02010
pme2292	UPLC-MS/MS	Positive	89.11	72.08	88.1	C4H12N2	[M+H]+	-	-	Putrescine	Alkaloids	Phenolamine	110-60-1	2	-	152480	146710	201600	480870	232640	248630	105810	125410	109180	C00134	ko00330,ko00472,ko00480,ko00960,ko01100,ko01110,ko02010
pmf0096	UPLC-MS/MS	Negative	88.99	70.9	89.995	C2H2O4	[M-H]-	-	-	Oxalic acid	Phenolic acids	Phenolic acids	144-62-7	2	-	10946	11534	10955	16174	10153	18212	6119.9	11884	15307	C00209	ko00230,ko00630,ko01100
pme2601	UPLC-MS/MS	Negative	89	59	90.032	C3H6O3	[M-H]-	-	-	3-Hydroxypropanoic acid	Organic acids	Organic acids	503-66-2	2	-	6279.3	13037	13000	8964.6	5708.4	10996	21424	23626	17524	C01013	ko00240,ko00410,ko00640,ko01100,ko01200
Lmgn002679	UPLC-MS/MS	Negative	93.03	75.02	94.042	C6H6O	[M-H]-	-	-	Phenol	Phenolic acids	Phenolic acids	108-95-2	3	-	20423	13615	12595	1370.2	1401.5	1388.2	52874	50950	48079	C00146	ko00350,ko01100
Lmqp000873	UPLC-MS/MS	Positive	101.02	55.02	100.018	C4H4O3	[M+H]+	-	-	Succinic anhydride	Organic acids	Organic acids	108-30-5	3	-	537760	569420	548540	261970	200590	195570	991490	1171300	1000200	C19524	--
mws4052	UPLC-MS/MS	Positive	102.05	56.05	101.048	C4H7NO2	[M+H]+	-	-	1-Aminocyclopropane-1-carboxylic acid	Organic acids	Organic acids	22059-21-8	3	-	108230	120360	118560	62293	87077	84914	74895	121060	99395	C01234	ko00270,ko01100,ko01110
pmf0256	UPLC-MS/MS	Negative	101.1	84.7	102.104	C6H14O	[M-H]-	-	-	3-Methyl-1-pentanol	Others	Saccharides and Alcohols	589-35-5	2	-	16688	16176	30415	35024	27590	36110	9	9	9	--	--
pme3033	UPLC-MS/MS	Positive	104.07	86	103.063	C4H9NO2	[M+H]+	-	-	N,N-Dimethylglycine	Amino acids and derivatives	Amino acids and derivatives	1118-68-9	1	-	188390	228570	193820	319970	249820	278900	116490	122440	120610	C01026	ko00260,ko01100
pme3017	UPLC-MS/MS	Positive	104.07	58	103.063	C4H9NO2	[M+H]+	-	-	2-Aminoisobutyric acid	Amino acids and derivatives	Amino acids and derivatives	62-57-7	1	-	801100	826010	802760	821760	800160	774920	866730	917700	745900	C03665	--
pme3011	UPLC-MS/MS	Positive	104.07	68.8	103.063	C4H9NO2	[M+H]+	-	-	γ-Aminobutyric acid	Organic acids	Organic acids	56-12-2	2	-	183550	188350	203410	368410	291410	358930	77604	98215	87007	C00334	ko00250,ko00330,ko00410,ko00650,ko00760,ko01100
pmb0484	UPLC-MS/MS	Positive	104.1	60.1	103.091	C5H13NO	[M+H]+	-	-	Choline	Alkaloids	Alkaloids	62-49-7	3	-	8096800	7372300	8075600	8138800	7925900	8032200	7741300	8245500	7774100	C00114	ko00260,ko00564,ko01100,ko02010
mws0576	UPLC-MS/MS	Negative	103.04	59.1	104.047	C4H8O3	[M-H]-	-	-	3-Hydroxybutyric acid	Organic acids	Organic acids	300-85-6	3	-	72832	55921	75759	52948	40731	52463	111840	93042	99906	C01089	ko00072,ko00650,ko01100
pme1975	UPLC-MS/MS	Negative	103	59	104.06	C3H4O4	[M-H]-	-	-	Malonic acid	Organic acids	Organic acids	141-82-2	2	-	82341	81441	65558	45594	45913	52735	132020	141810	141340	C00383	ko00061,ko00240,ko00410,ko01100,ko01212
pme0010	UPLC-MS/MS	Positive	106	60	105.043	C3H7NO3	[M+H]+	-	-	L-Serine	Amino acids and derivatives	Amino acids and derivatives	56-45-1	2	-	426390	341760	408590	330080	357900	324850	487780	524810	470870	C00065	ko00260,ko00261,ko00270,ko00460,ko00600,ko00630,ko00920,ko00970,ko01100,ko01110,ko01200,ko01230,ko02010
mws0255	UPLC-MS/MS	Positive	112.05	95	111.043	C4H5N3O	[M+H]+	-	-	Cytosine	Nucleotides and derivatives	Nucleotides and derivatives	71-30-7	1	-	166620	177390	159750	191940	172310	191810	177220	219300	167260	C00380	ko00240,ko01100
pme2122	UPLC-MS/MS	Positive	112.09	95	111.08	C5H9N3	[M+H]+	-	-	Histamine	Amino acids and derivatives	Amino acids and derivatives	51-45-6	2	-	173590	183960	151110	205160	191980	178810	155480	185160	162540	C00388	ko00340,ko01100,ko01110
pme0257	UPLC-MS/MS	Negative	111.02	80	112.027	C4H4N2O2	[M-H]-	-	-	Uracil	Nucleotides and derivatives	Nucleotides and derivatives	66-22-8	2	-	17768	22140	17728	12658	11873	14619	26065	21917	16500	C00106	ko00240,ko00410,ko00770,ko01100
pme0006	UPLC-MS/MS	Positive	116.07	70.1	115.063	C5H9NO2	[M+H]+	-	-	L-Proline	Amino acids and derivatives	Amino acids and derivatives	147-85-3	1	-	6446900	5470900	6565100	7240400	7007400	6856300	5256400	5665600	5470900	C00148	ko00330,ko00332,ko00970,ko01100,ko01110,ko01230,ko02010
pmb1096	UPLC-MS/MS	Positive	118.07	91	117.058	C8H7N	[M+H]+	-	-	Indole	Alkaloids	Plumerane	120-72-9	1	-	95610	109780	97302	157320	139050	136820	123330	103750	81920	C00463	ko00380,ko00400,ko00402,ko01100,ko01110
pme0120	UPLC-MS/MS	Positive	118.09	101	117.079	C5H11NO2	[M+H]+	-	-	5-Aminovaleric acid	Amino acids and derivatives	Amino acids and derivatives	660-88-8	2	-	29615	32297	12930	51783	56404	43200	28263	17542	21183	C00431	ko00310,ko00330,ko01100
MWSmce548	UPLC-MS/MS	Positive	118.09	58.07	117.079	C5H11NO2	[M+H]+	-	-	Betaine	Alkaloids	Alkaloids	107-43-7	3	-	957170	939460	940350	1473300	1535500	1674200	392070	537370	494330	C00719	ko00260,ko01100,ko02010
mws0256	UPLC-MS/MS	Positive	118.09	72.1	117.079	C5H11NO2	[M+H]+	-	-	L-Valine	Amino acids and derivatives	Amino acids and derivatives	72-18-4	1	-	9459400	8754400	8878100	12950000	10258000	10686000	11497000	11900000	10093000	C00183	ko00280,ko00290,ko00311,ko00460,ko00770,ko00966,ko00970,ko01100,ko01110,ko01210,ko01230,ko02010
mws0470	UPLC-MS/MS	Negative	117.02	73	118.027	C4H6O4	[M-H]-	-	-	Methylmalonic acid*	Organic acids	Organic acids	516-05-2	1	-	15908000	15025000	16419000	8821900	6768500	6685000	23089000	21910000	22097000	C02170	ko00240,ko00280,ko00640,ko01100
mws0192	UPLC-MS/MS	Negative	117.02	73	118.027	C4H6O4	[M-H]-	-	-	Succinic acid*	Organic acids	Organic acids	110-15-6	1	-	15029000	14954000	15427000	8513300	6803900	6121800	19809000	21836000	21207000	C00042	ko00020,ko00190,ko00250,ko00310,ko00350,ko00360,ko00620,ko00630,ko00640,ko00650,ko00760,ko00920,ko01100,ko01110,ko01200
mws0147	UPLC-MS/MS	Negative	117.06	59	118.063	C5H10O3	[M-H]-	-	-	β-Hydroxyisovaleric acid	Organic acids	Organic acids	625-08-1	2	-	69157	81981	80696	130330	95847	127960	165990	180050	162450	C20827	ko00280,ko01100
mws0671	UPLC-MS/MS	Positive	120.07	74.1	119.058	C4H9NO3	[M+H]+	-	-	L-Homoserine*	Organic acids	Organic acids	672-15-1	3	-	428590	497240	467740	478070	450710	447570	515290	564630	539210	C00263	ko00260,ko00270,ko00300,ko00920,ko01100,ko01110,ko01230
mws0230	UPLC-MS/MS	Positive	120.07	74	119.058	C4H9NO3	[M+H]+	-	-	L-Threonine*	Amino acids and derivatives	Amino acids and derivatives	72-19-5	1	-	477120	401540	459060	430000	423770	428930	504130	568170	513030	C00188	ko00260,ko00261,ko00290,ko00860,ko00970,ko01100,ko01110,ko01230,ko02010
pmp001287	UPLC-MS/MS	Positive	120.08	103.05	119.073	C8H9N	[M+H]+	-	-	N-Benzylmethylene isomethylamine	Alkaloids	Alkaloids	-	1	-	4114200	3904500	4072000	6161600	5031200	5459100	4779200	4939300	4569700	--	--
pma0134	UPLC-MS/MS	Positive	121.04	93.06	120.042	C4H8O4	[M+H]+	-	-	D-(-)-Threose	Others	Saccharides and Alcohols	95-43-2	2	-	557010	612180	639540	1392500	1056500	1204300	552200	603690	470840	C06463	--
pme0195	UPLC-MS/MS	Negative	120.02	62	121.02	C3H7NO2S	[M-H]-	-	-	L-Cysteine	Amino acids and derivatives	Amino acids and derivatives	52-90-4	2	-	27117	18372	27934	9064.5	9400.6	21557	25053	16982	18801	C00097	ko00260,ko00270,ko00311,ko00332,ko00430,ko00460,ko00480,ko00730,ko00770,ko00920,ko00970,ko01100,ko01110,ko01200,ko01230,ko04122
pmb0069	UPLC-MS/MS	Positive	122	105	121.053	C7H7NO	[M+H]+	-	-	Benzamide	Phenolic acids	Phenolic acids	55-21-0	2	-	124720	144320	136560	226640	173020	172210	189070	147370	126670	C09815	--
mws0628	UPLC-MS/MS	Negative	121.03	92	122.037	C7H6O2	[M-H]-	-	-	4-Hydroxybenzaldehyde	Phenolic acids	Phenolic acids	123-08-0	1	-	114150	100980	118570	125230	108700	114500	179080	191140	165720	C00633	ko01100
mws0133	UPLC-MS/MS	Positive	123.06	80.05	122.048	C6H6N2O	[M+H]+	-	-	Nicotinamide	Others	Vitamin	98-92-0	3	-	2622400	2603000	2690800	3345300	2869700	3158000	3123300	3239200	2869300	C00153	ko00760,ko01100
pme2134	UPLC-MS/MS	Negative	121	59	122.058	C4H10O4	[M-H]-	-	-	D-Threitol	Others	Saccharides and Alcohols	2418-52-2	2	-	62022	112690	121680	77717	103880	107100	90977	89967	81920	C16884	--
pme1216	UPLC-MS/MS	Negative	122.03	78	123.032	C6H5NO2	[M-H]-	-	-	2-Picolinic acid	Organic acids	Organic acids	98-98-6	2	-	6695.8	7868.3	5476.3	9317.3	5023.9	10674	11307	7164.6	10670	C10164	ko00380,ko01100
pme0490	UPLC-MS/MS	Positive	124.04	78	123.032	C6H5NO2	[M+H]+	-	-	Nicotinic acid (Vitamin B3)	Others	Vitamin	59-67-6	1	-	120490	138920	170350	173010	127320	160710	192220	182260	201370	C00253	ko00760,ko00960,ko01100,ko01110
Lmbp000668	UPLC-MS/MS	Positive	124.04	78.03	123.032	C6H5NO2	[M+H]+	-	-	Isonicotinic acid	Organic acids	Organic acids	55-22-1	1	-	278240	243770	302910	347670	286560	345270	353680	387270	371190	C07446	--
mws0572	UPLC-MS/MS	Positive	126.07	109	125.059	C5H7N3O	[M+H]+	-	-	5-Methylcytosine	Nucleotides and derivatives	Nucleotides and derivatives	554-01-8	3	-	108730	95671	109890	267700	146240	248710	255810	325960	226410	C02376	ko00240,ko01100
pmp001086	UPLC-MS/MS	Positive	127.04	97	126.032	C6H6O3	[M+H]+	-	-	5-Hydroxymethylfurfural	Phenolic acids	Phenolic acids	67-47-0	3	-	66928	72541	93986	14622	25427	39727	69419	62985	81804	C11101	--
mws0251	UPLC-MS/MS	Positive	127.05	110	126.043	C5H6N2O2	[M+H]+	-	-	Thymine	Nucleotides and derivatives	Nucleotides and derivatives	65-71-4	3	-	28653	23558	21577	43254	33069	42688	53647	58001	46299	C00178	ko00240,ko01100
MWSmce709	UPLC-MS/MS	Positive	130.06	103.05	129.058	C9H7N	[M+H]+	-	-	Isoquinoline	Alkaloids	Isoquinoline alkaloids	119-65-3	2	-	76472	94344	91696	80552	85337	86764	108570	83614	129100	C06323	--
Rfmb319	UPLC-MS/MS	Positive	130.09	84.08	129.079	C6H11NO2	[M+H]+	-	-	Pipecolic acid*	Amino acids and derivatives	Amino acids and derivatives	4043-87-2	3	-	490760	545670	510720	633820	546990	507100	603630	636380	444550	C00408	ko00310,ko00960,ko01100,ko01110
ML10181668	UPLC-MS/MS	Positive	130.09	84.08	129.079	C6H11NO2	[M+H]+	-	-	Cycloleucine*	Amino acids and derivatives	Amino acids and derivatives	52-52-8	3	-	2218600	2296300	2505100	2361700	2761000	2587100	2676500	2419900	2044400	C03969	--
Zmgn000217	UPLC-MS/MS	Negative	129.02	85.03	130.027	C5H6O4	[M-H]-	-	-	Methylenesuccinic acid	Organic acids	Organic acids	97-65-4	3	-	29302	35324	28305	16278	40350	33542	9	9	9	C00490	ko00660,ko01100
pme2693	UPLC-MS/MS	Positive	131.12	114.09	130.111	C6H14N2O	[M+H]+	-	-	N-Acetylputrescine	Alkaloids	Phenolamine	18233-70-0	2	-	898120	768690	974700	1197000	1075000	1224600	854500	1085700	833890	C02714	ko00330,ko01100
pmb0501	UPLC-MS/MS	Positive	131.13	114.1	130.122	C5H14N4	[M+H]+	-	-	Agmatine	Alkaloids	Phenolamine	306-60-5	3	-	1079400	1013000	995780	1336600	1263100	1399900	1120200	1292400	1074400	C00179	ko00330,ko01100
pmf0470	UPLC-MS/MS	Positive	132.07	73	131.058	C5H9NO3	[M+H]+	-	-	cis-4-Hydroxy-D-proline	Amino acids and derivatives	Amino acids and derivatives	2584-71-6	2	-	89899	134680	89237	153960	175920	159830	129750	138010	106790	C03440	ko00330,ko01100
mws0712	UPLC-MS/MS	Negative	130.05	86	131.058	C5H9NO3	[M-H]-	-	-	N-Propionylglycine	Amino acids and derivatives	Amino acids and derivatives	21709-90-0	3	-	84855	58553	79797	102870	69327	116510	115620	131160	83665	--	--
mws0216	UPLC-MS/MS	Positive	132.07	86	131.058	C5H9NO3	[M+H]+	-	-	Trans-4-Hydroxy-L-proline	Amino acids and derivatives	Amino acids and derivatives	51-35-4	3	-	4763900	5048700	5196000	3564400	3754900	3629200	4181300	4725400	5452200	C01157	ko00330,ko01100,ko02010
pme2679	UPLC-MS/MS	Positive	132	86	131.095	C6H13NO2	[M+H]+	-	-	L-Allo-isoleucine	Amino acids and derivatives	Amino acids and derivatives	1509-34-8	2	-	930460	720170	1005500	720800	736000	575850	626130	708500	935720	C21096	--
pme0274	UPLC-MS/MS	Positive	132.1	69	131.095	C6H13NO2	[M+H]+	-	-	6-Aminocaproic acid	Organic acids	Organic acids	60-32-2	2	-	647760	235030	731300	656540	476380	692330	1137600	985270	1228600	C02378	ko01100
mws1587	UPLC-MS/MS	Positive	132.1	86	131.095	C6H13NO2	[M+H]+	-	-	L-Norleucine	Amino acids and derivatives	Amino acids and derivatives	327-57-1	1	-	6709200	7746800	7304100	7505700	6212400	7083200	14999000	15346000	10922000	C01933	--
mws0258	UPLC-MS/MS	Positive	132.1	86	131.095	C6H13NO2	[M+H]+	-	-	L-Isoleucine*	Amino acids and derivatives	Amino acids and derivatives	73-32-5	1	-	6682600	7590300	6648000	6565700	5950200	6970500	14924000	14504000	11054000	C00407	ko00280,ko00290,ko00460,ko00960,ko00966,ko00970,ko01100,ko01110,ko01210,ko01230,ko02010
mws0227	UPLC-MS/MS	Positive	132.1	86.2	131.095	C6H13NO2	[M+H]+	-	-	L-Leucine*	Amino acids and derivatives	Amino acids and derivatives	61-90-5	1	-	6369000	7580200	6482500	6608000	5793200	6668200	14360000	14367000	9952900	C00123	ko00280,ko00290,ko00966,ko00970,ko01100,ko01110,ko01210,ko01230,ko02010
pme0243	UPLC-MS/MS	Negative	131.03	87.05	132.042	C5H8O4	[M-H]-	-	-	Glutaric acid	Organic acids	Organic acids	110-94-1	2	-	78105	80685	74424	163670	95105	134760	84482	74664	78743	C00489	ko00071,ko00310,ko01100
mws0473	UPLC-MS/MS	Negative	131.03	87.05	132.042	C5H8O4	[M-H]-	-	-	2-Methylsuccinic acid*	Organic acids	Organic acids	498-21-5	3	-	185830	187750	166680	341010	246010	271670	146080	138720	150370	--	--
Lmmn002164	UPLC-MS/MS	Negative	131.03	87.05	132.042	C5H8O4	[M-H]-	-	-	Monomethyl succinate*	Organic acids	Organic acids	3878-55-5	3	-	22627	20709	23860	34391	26039	32245	21202	19175	18644	--	--
mws1503	UPLC-MS/MS	Positive	133.06	115	132.058	C9H8O	[M+H]+	-	-	Cinnamaldehyde	Phenolic acids	Phenolic acids	104-55-2	3	-	10889	13217	17658	20808	14667	21293	18725	23530	14029	C00903	ko00940,ko01100,ko01110
pme2527	UPLC-MS/MS	Positive	133	116	132.09	C5H12N2O2	[M+H]+	-	-	L-Ornithine	Amino acids and derivatives	Amino acids and derivatives	70-26-8	2	-	2136.2	3378.7	1829.8	3806.1	4162.3	6413.8	10624	9	9	C00077	ko00220,ko00330,ko00472,ko00480,ko01100,ko01110,ko01210,ko01230,ko02010
mws0219	UPLC-MS/MS	Negative	132.03	88	133.038	C4H7NO4	[M-H]-	-	-	L-Aspartic Acid	Amino acids and derivatives	Amino acids and derivatives	56-84-8	1	-	225940	232470	228560	288050	272930	285230	135680	125910	144090	C00049	ko00220,ko00250,ko00260,ko00261,ko00270,ko00300,ko00340,ko00410,ko00460,ko00710,ko00760,ko00770,ko00970,ko01100,ko01110,ko01200,ko01210,ko01230,ko02010
MWS1709	UPLC-MS/MS	Negative	133.01	71.01	134.022	C4H6O5	[M-H]-	-	-	D-Malic acid	Organic acids	Organic acids	636-61-3	1	-	2403200	2137200	2232200	2094500	2068000	2227000	2181100	1519000	1701500	C00497	ko00650,ko01100
mws0275	UPLC-MS/MS	Negative	133.01	71.01	134.022	C4H6O5	[M-H]-	-	-	L-Malic acid*	Organic acids	Organic acids	97-67-6	1	-	1474500	2207600	2378800	1363200	3128300	2177400	2164300	1821000	1503200	C00149	ko00020,ko00620,ko00630,ko00710,ko01100,ko01110,ko01200
Lmbn000198	UPLC-MS/MS	Negative	133.01	71.01	134.022	C4H6O5	[M-H]-	-	-	3-Dehydro-L-Threonic Acid*	Organic acids	Organic acids	-	1	-	3783000	4028500	3376900	2443400	3289900	2395200	3356900	5125600	3011500	C03064	ko00053,ko01100
MWSmce701	UPLC-MS/MS	Positive	135.08	79.05	134.073	C9H10O	[M+H]+	-	-	4-Ethylbenzaldehyde	Others	Others	4748-78-1	2	-	8956.4	7421.5	5827.8	9	9	9	8777.6	23468	11602	--	--
pme0040	UPLC-MS/MS	Positive	136.06	119	135.054	C5H5N5	[M+H]+	-	-	Adenine	Nucleotides and derivatives	Nucleotides and derivatives	73-24-5	1	-	509860	456100	502870	613590	523880	572230	515040	600190	422190	C00147	ko00230,ko00908,ko01100
pmb0374	UPLC-MS/MS	Positive	136.06	118.9	135.054	C5H5N5	[M+H]+	-	-	2-Aminopurine	Nucleotides and derivatives	Nucleotides and derivatives	452-06-2	1	-	30660	44259	29199	49502	40197	45138	63332	51426	45996	--	--
HJKP000649	UPLC-MS/MS	Positive	136.07	91.05	135.068	C8H9NO	[M+H]+	-	-	N-benzylformamide	Alkaloids	Alkaloids	6343-54-0	2	-	38846	30495	52269	160660	107680	109940	9	9	37672	C15561	--
mws0889	UPLC-MS/MS	Negative	135.03	75.01	136.037	C4H8O5	[M-H]-	-	-	D-Threonic Acid	Others	Saccharides and Alcohols	3909-12-4	3	-	134720	169030	133160	114040	88368	116760	136200	159240	170980	C21649	--
pme0033	UPLC-MS/MS	Positive	137.05	119	136.039	C5H4N4O	[M+H]+	-	-	Hypoxanthine	Nucleotides and derivatives	Nucleotides and derivatives	68-94-0	2	-	122600	121820	141750	481760	358450	433330	95283	88400	56876	C00262	ko00230,ko01100
MWS1852	UPLC-MS/MS	Positive	137.06	94.04	136.052	C8H8O2	[M+H]+	-	-	4-Methoxybenzaldehyde	Phenolic acids	Phenolic acids	123-11-5	3	-	386410	389950	420720	9	9	9	910890	1219700	909030	C10761	--
pme2268	UPLC-MS/MS	Positive	138.06	94.07	137.048	C7H7NO2	[M+H]+	-	-	Trigonelline	Alkaloids	Alkaloids	535-83-1	1	-	3272400	2965700	3377500	3544200	3110600	3676600	3268600	3574700	3647000	C01004	ko00760
mws1336	UPLC-MS/MS	Positive	138.06	120	137.048	C7H7NO2	[M+H]+	-	-	4-Aminobenzoic acid	Phenolic acids	Phenolic acids	150-13-0	2	-	57670	64132	43899	124390	94870	119630	45173	52203	60456	C00568	ko00790,ko01100
mws1078	UPLC-MS/MS	Positive	138.05	92.1	137.048	C7H7NO2	[M+H]+	-	-	Anthranilic Acid	Phenolic acids	Phenolic acids	118-92-3	2	-	36082	28376	13049	32545	38822	41383	27392	35696	21036	C00108	ko00380,ko00400,ko00998,ko01058,ko01100,ko01110,ko01230
mws0146	UPLC-MS/MS	Positive	138.05	78	137.048	C7H7NO2	[M+H]+	-	-	Nicotinic Acid Methyl Ester(Methyl Nicotinate)	Alkaloids	Alkaloids	93-60-7	3	-	12246	26697	21796	18859	15431	22185	23359	30063	41160	--	--
pme1002	UPLC-MS/MS	Positive	138.09	103	137.084	C8H11NO	[M+H]+	-	-	L-Tyramine	Amino acids and derivatives	Amino acids and derivatives	51-67-2	1	-	16643000	18461000	18641000	35534000	29019000	32375000	19287000	18415000	15843000	C00483	ko00350,ko00950,ko01100,ko01110
mws0749	UPLC-MS/MS	Negative	137.02	93	138.032	C7H6O3	[M-H]-	-	-	4-Hydroxybenzoic acid	Phenolic acids	Phenolic acids	99-96-7	3	-	42393	75416	77330	76606	43519	49491	104310	93995	101790	C00156	ko00130,ko00790,ko01100,ko01110
Lmgn001670	UPLC-MS/MS	Negative	137.03	108.02	138.032	C7H6O3	[M-H]-	-	-	Salicylic acid	Phenolic acids	Phenolic acids	69-72-7	3	-	12058	15073	11308	18152	12100	12404	17656	17496	15553	C00805	ko00360,ko01100,ko01110,ko04075
Lmbn002862	UPLC-MS/MS	Negative	137.02	93.03	138.032	C7H6O3	[M-H]-	-	-	3-Hydroxybenzoic Acid	Organic acids	Organic acids	99-06-9	3	-	7816100	7347100	7503700	514540	413180	477160	20182000	19637000	19424000	C00587	ko00400
Lmbn001981	UPLC-MS/MS	Negative	137.02	93.03	138.032	C7H6O3	[M-H]-	-	-	2,5-Dihydroxybenzaldehyde*	Phenolic acids	Phenolic acids	1194-98-5	3	-	67804	47304	80115	70952	65904	47103	85414	83347	82133	C05585	ko00350,ko01100
Hmgn001653	UPLC-MS/MS	Negative	137.02	93.04	138.032	C7H6O3	[M-H]-	-	-	Protocatechualdehyde*	Phenolic acids	Phenolic acids	139-85-5	3	-	56556	62433	66622	51030	68349	76729	103010	93924	95224	C16700	ko00950
pme2828	UPLC-MS/MS	Positive	140	99	139.027	C6H5NO3	[M+H]+	-	-	4-Nitrophenol	Phenolic acids	Phenolic acids	100-02-7	2	-	44023000	43538000	44202000	38513000	42130000	39074000	43495000	40255000	44774000	C00870	--
mws0704	UPLC-MS/MS	Negative	140.01	78.96	141.019	C2H8NO4P	[M-H]-	-	-	O-Phosphorylethanolamine	Alkaloids	Alkaloids	1071-23-4	3	-	14132	17688	18040	14087	16990	17326	18964	17055	12288	C00346	ko00564,ko00600,ko01100
pme3207	UPLC-MS/MS	Negative	141.02	59	142.027	C6H6O4	[M-H]-	-	-	Muconic acid	Organic acids	Organic acids	1119-72-8	2	-	187150	199530	174510	126810	162130	150470	121850	102640	129870	C02480	ko01100
Rfmb320	UPLC-MS/MS	Positive	144.1	84.08	143.095	C7H13NO2	[M+H]+	-	-	1-Methylpiperidine-2-carboxylic acid	Amino acids and derivatives	Amino acids and derivatives	7730-87-2	3	-	235500	277500	230330	428340	374050	366980	132380	123790	148180	--	--
MWSmce157	UPLC-MS/MS	Positive	144.1	58.06	143.095	C7H13NO2	[M+H]+	-	-	Stachydrine	Alkaloids	Alkaloids	471-87-4	3	-	60417	58515	57613	110440	98636	104550	33004	28010	29007	C10172	--
Hmsp000364	UPLC-MS/MS	Positive	144.1	98.09	143.095	C7H13NO2	[M+H]+	-	-	L-Cyclopentylglycine	Amino acids and derivatives	Amino acids and derivatives	2521-84-8	3	-	817210	896370	914940	1074800	980710	1086700	1110400	1189200	1105900	--	--
Rfmb318	UPLC-MS/MS	Positive	144.1	84.08	144.092	C7H14NO2+	[M]+	-	-	D-Proline betaine	Amino acids and derivatives	Amino acids and derivatives	1195-94-4	3	-	130020	100680	119500	172840	182560	186010	45727	60570	62996	C21514	--
Lmyn008503	UPLC-MS/MS	Negative	143.11	143.11	144.115	C8H16O2	[M-H]-	-	-	Octanoic acid	Lipids	Free fatty acids	124-07-2	2	-	2118.4	1273.9	1245.7	3550.1	2032.4	2254.8	1950	811.12	1944.5	C06423	ko00061,ko00785,ko01100
Hmmp002124	UPLC-MS/MS	Positive	146.06	118.06	145.053	C9H7NO	[M+H]+	-	-	Indole-3-carboxaldehyde	Alkaloids	Plumerane	487-89-8	2	-	72038	82023	86679	92453	75379	108340	103850	96860	95994	C08493	--
pme0295	UPLC-MS/MS	Positive	146.08	86	145.074	C6H11NO3	[M+H]+	-	-	4-Acetamidobutyric acid	Organic acids	Organic acids	3025-96-5	2	-	1271800	1162500	1276700	341840	212080	217320	4660300	5276700	4141300	C02946	ko00330,ko01100
Lmqp000427	UPLC-MS/MS	Positive	146.08	82.07	145.074	C6H11NO3	[M+H]+	-	-	N-Methyl-Trans-4-Hydroxy-L-Proline	Amino acids and derivatives	Amino acids and derivatives	4252-82-8	3	-	108150	71911	67002	89403	76654	103080	47174	77151	78573	--	--
mws0567	UPLC-MS/MS	Positive	146.09	87	145.085	C5H11N3O2	[M+H]+	-	-	4-Guanidinobutyric acid	Organic acids	Organic acids	463-00-3	1	-	744130	655380	821360	939280	764700	858010	956930	953900	912140	C01035	ko00330,ko01100
mws0017	UPLC-MS/MS	Positive	146.17	72.2	145.158	C7H19N3	[M+H]+	-	-	Spermidine	Alkaloids	Phenolamine	124-20-9	3	-	785530	1361800	883190	1334000	1707300	1872800	1057900	1095200	920750	C00315	ko00330,ko00410,ko00480,ko00940,ko01100,ko02010
pme2380	UPLC-MS/MS	Negative	145.01	101	146.022	C5H6O5	[M-H]-	-	-	α-Ketoglutaric acid	Organic acids	Organic acids	328-50-7	2	-	142280	127860	131110	619140	648560	677450	28012	25541	30953	C00026	ko00020,ko00040,ko00053,ko00220,ko00250,ko00300,ko00310,ko00340,ko00430,ko00630,ko00650,ko00660,ko01100,ko01110,ko01200,ko01210,ko01230
mws1012	UPLC-MS/MS	Positive	147.04	103	146.037	C9H6O2	[M+H]+	-	-	Coumarin	Lignans and Coumarins	Coumarins	91-64-5	2	-	10176	5198.4	9933.4	4170.7	9	9	9	9	9	C05851	ko00940,ko01110
Wmzn000227	UPLC-MS/MS	Negative	145.06	109.04	146.058	C6H10O4	[M-H]-	-	-	2,2-Dimethylsuccinic acid	Organic acids	Organic acids	597-43-3	3	-	4298.8	5291.5	5328	5267.5	5823	2702.5	1044	582.5	2152.2	--	--
mws0924	UPLC-MS/MS	Negative	145.05	101	146.058	C6H10O4	[M-H]-	-	-	2-Methylglutaric acid*	Organic acids	Organic acids	617-62-9	3	-	117320	117080	130470	228380	193040	208600	75253	71808	69132	--	--
mws0208	UPLC-MS/MS	Negative	145.05	101	146.058	C6H10O4	[M-H]-	-	-	Adipic Acid*	Organic acids	Organic acids	124-04-9	3	-	46318	45053	66338	115000	72669	94197	27180	40960	32475	C06104	ko01100
Lmbn001609	UPLC-MS/MS	Negative	145.05	83.05	146.058	C6H10O4	[M-H]-	-	-	2-Acetyl-2-Hydroxybutanoic Acid	Organic acids	Organic acids	-	3	-	12459	12706	11179	31055	14630	23527	5658.8	11331	6053.7	C06006	ko00290,ko01100,ko01110,ko01210,ko01230
pme0193	UPLC-MS/MS	Positive	147.08	84	146.069	C5H10N2O3	[M+H]+	-	-	L-Glutamine	Amino acids and derivatives	Amino acids and derivatives	56-85-9	2	-	365130	705310	657770	794740	754480	643310	664150	633650	744740	C00064	ko00220,ko00230,ko00240,ko00250,ko00630,ko00750,ko00910,ko00970,ko01100,ko01230,ko02010
pme0026	UPLC-MS/MS	Positive	147.11	84	146.106	C6H14N2O2	[M+H]+	-	-	L-Lysine	Amino acids and derivatives	Amino acids and derivatives	56-87-1	2	-	357370	802420	604880	946200	602640	618350	644580	584050	606910	C00047	ko00300,ko00310,ko00780,ko00960,ko00970,ko01100,ko01110,ko01210,ko01230,ko02010
pme1691	UPLC-MS/MS	Positive	147.13	87.2	146.118	C7H16NO2	[M+H]+	-	-	Acetylcholine	Alkaloids	Alkaloids	60-31-1	2	-	322300	476630	422790	325180	425410	444720	420510	427130	464550	C01996	ko00564
pme0014	UPLC-MS/MS	Positive	148.06	84	147.053	C5H9NO4	[M+H]+	-	-	L-Glutamic acid	Amino acids and derivatives	Amino acids and derivatives	56-86-0	2	-	21707000	22826000	22152000	22472000	21468000	21677000	22324000	22544000	22951000	C00025	ko00220,ko00250,ko00330,ko00332,ko00340,ko00430,ko00480,ko00630,ko00650,ko00660,ko00860,ko00910,ko00970,ko01100,ko01110,ko01200,ko01210,ko01230,ko02010
mws1050	UPLC-MS/MS	Positive	148.06	88	147.053	C5H9NO4	[M+H]+	-	-	O-Acetylserine	Amino acids and derivatives	Amino acids and derivatives	5147-00-2	1	-	196260	216740	193270	263580	240160	241610	132380	126360	150070	C00979	ko00270,ko00908,ko00920,ko01100,ko01110,ko01200,ko01230,ko04122
pmp001285	UPLC-MS/MS	Positive	149.02	65.04	148.016	C8H4O3	[M+H]+	-	-	Phthalic anhydride	Phenolic acids	Phenolic acids	85-44-9	1	-	976730	1014400	1167300	1554200	1385800	1317300	1445200	1242800	1209100	--	--
Zmyn000247	UPLC-MS/MS	Negative	147.03	57.03	148.037	C5H8O5	[M-H]-	-	-	2-Hydroxyglutaric Acid*	Organic acids	Organic acids	13095-48-2	3	-	37477	34596	14010	31904	32082	41009	9	9	9	C03196	ko00310,ko01100
pmb2826	UPLC-MS/MS	Negative	147.03	87.1	148.037	C5H8O5	[M-H]-	-	-	L-Citramalic acid	Organic acids	Organic acids	6236-09-5	3	-	75414	68335	53895	72021	68427	91867	69915	75262	66664	C02614	ko00660,ko01100
ML10171848	UPLC-MS/MS	Negative	147.03	85.03	148.037	C5H8O5	[M-H]-	-	-	D-Arabinono-1,4-lactone	Others	Saccharides and Alcohols	2782-09-4	3	-	1516200	1715600	1327600	2375200	1951500	1852000	2272200	1975600	2266300	C00652	--
Lmbn000216	UPLC-MS/MS	Negative	147.03	57.03	148.037	C5H8O5	[M-H]-	-	-	3-Methylmalic acid*	Organic acids	Organic acids	152204-30-3	3	-	33645	25737	24166	48640	51255	39697	48496	33238	31484	C06032	ko00290,ko00660,ko01100,ko01210,ko01230
pme2987	UPLC-MS/MS	Negative	147.05	119	148.052	C9H8O2	[M-H]-	-	-	3,4-Dihydrocoumarin	Lignans and Coumarins	Coumarins	119-84-6	2	-	2393.4	3122.9	3659.3	4655.4	4346.7	4221.8	3855.2	1984.6	3691.2	C02274	--
mws2213	UPLC-MS/MS	Negative	147.05	77.01	148.052	C9H8O2	[M-H]-	-	-	Cinnamic acid	Phenolic acids	Phenolic acids	140-10-3	1	-	47448	56634	53788	86340	73965	81942	45705	47865	43611	C00423	ko00130,ko00360,ko00940,ko00998,ko01100,ko01110
pme3154	UPLC-MS/MS	Negative	147.07	59.01	148.074	C6H12O4	[M-H]-	-	-	Mevalonic acid	Organic acids	Organic acids	150-97-0	2	-	1398500	1250500	1522000	1373400	1442400	1281700	9	9	9	C00418	ko00900,ko01100,ko01110
Lmgp000796	UPLC-MS/MS	Positive	150.06	61.01	149.048	C8H7NO2	[M+H]+	-	-	4-Hydroxymandelonitrile	Alkaloids	Alkaloids	13093-65-7	1	-	771130	703790	657680	957720	788510	898310	577680	535090	652090	C00650	--
pme1210	UPLC-MS/MS	Positive	150.06	61	149.051	C5H11NO2S	[M+H]+	-	-	L-Methionine	Amino acids and derivatives	Amino acids and derivatives	63-68-3	1	-	714560	627560	625540	897370	728270	915280	569600	525800	596450	C00073	ko00270,ko00966,ko00970,ko01100,ko01110,ko01210,ko01230
mws0847	UPLC-MS/MS	Positive	150.08	133	149.07	C6H7N5	[M+H]+	-	-	1-Methyladenine	Nucleotides and derivatives	Nucleotides and derivatives	5142-22-3	2	-	26105	30963	17004	38667	25957	30841	28868	23279	21777	C02216	--
mws0262	UPLC-MS/MS	Negative	149.01	87	150.016	C4H6O6	[M-H]-	-	-	L-Tartaric acid	Organic acids	Organic acids	87-69-4	3	-	48956	39259	32205	29734	45999	29423	9	9	9	C00898	ko00630,ko01100
Zmgn000173	UPLC-MS/MS	Negative	149.05	75.01	150.053	C5H10O5	[M-H]-	-	-	D-Ribose	Others	Saccharides and Alcohols	50-69-1	3	-	16132	31055	15431	14198	22147	28347	24017	20303	31951	C00121	ko00030,ko01100,ko02010
MWSmce682	UPLC-MS/MS	Negative	149.05	59.01	150.053	C5H10O5	[M-H]-	-	-	DL-Xylose	Others	Saccharides and Alcohols	25990-60-7	2	-	61733	43728	47564	34208	34552	38935	55484	51491	72465	--	--
MWSmce199	UPLC-MS/MS	Negative	149.05	59.02	150.053	C5H10O5	[M-H]-	-	-	L-Xylose	Others	Saccharides and Alcohols	609-06-3	3	-	57792	54163	62714	39586	44424	36006	54240	58035	56176	C01510	--
mws1499	UPLC-MS/MS	Negative	149.05	59.01	150.053	C5H10O5	[M-H]-	-	-	D-Arabinose	Others	Saccharides and Alcohols	10323-20-3	1	-	50473	58306	48667	43741	43636	48064	55744	61301	58268	C00216	--
pmf0420	UPLC-MS/MS	Negative	149.06	74.9	150.068	C9H10O2	[M-H]-	-	-	Benzyl acetate	Organic acids	Organic acids	140-11-4	2	-	35158	33093	22891	37331	31642	49124	62931	56731	48306	C15513	--
Lmxp001668	UPLC-MS/MS	Positive	151.08	91.05	150.068	C9H10O2	[M+H]+	-	-	2-Methoxy-4-ethenylphenol	Phenolic acids	Phenolic acids	7786-61-0	1	-	30875	21333	30148	9	9	9	43472	43872	49554	C17883	--
pme1109	UPLC-MS/MS	Positive	152.06	135	151.049	C5H5N5O	[M+H]+	-	-	Guanine	Nucleotides and derivatives	Nucleotides and derivatives	73-40-5	1	-	229640	224320	192350	353810	291890	376750	153620	188300	168910	C00242	ko00230,ko01100
pme0183	UPLC-MS/MS	Positive	152.06	135	151.049	C5H5N5O	[M+H]+	-	-	Isoguanine	Nucleotides and derivatives	Nucleotides and derivatives	3373-53-3	2	-	23772	21425	30169	30666	34553	39029	12546	12425	15066	--	--
pme0256	UPLC-MS/MS	Negative	151.03	151	152.033	C5H4N4O2	[M-H]-	-	-	Xanthine	Nucleotides and derivatives	Nucleotides and derivatives	69-89-6	2	-	9915	5679.3	12767	10684	10739	11185	20166	21552	22149	C00385	ko00230,ko00232,ko01100,ko01110
mws0458	UPLC-MS/MS	Negative	151.04	136	152.047	C8H8O3	[M-H]-	-	-	Vanillin	Phenolic acids	Phenolic acids	121-33-5	3	-	792510	795910	751740	497100	433130	491980	1326000	1341500	1700300	C00755	ko00998,ko01100,ko01110
pme0513	UPLC-MS/MS	Negative	151.06	59	152.068	C5H12O5	[M-H]-	-	-	Xylitol	Others	Saccharides and Alcohols	87-99-0	2	-	8610.6	8309.3	9331.3	9980	4302.7	11407	8967	8707.2	14136	C00379	ko00040,ko01100,ko02010
mws0438	UPLC-MS/MS	Negative	151.06	59	152.068	C5H12O5	[M-H]-	-	-	L-Arabitol	Others	Saccharides and Alcohols	7643-75-6	3	-	13870	9918.5	8254.9	6025.1	7303	7445.6	8251.9	10904	12105	C00532	ko00040,ko01100
mws0437	UPLC-MS/MS	Negative	151.06	71	152.068	C5H12O5	[M-H]-	-	-	D-Arabitol*	Others	Saccharides and Alcohols	488-82-4	3	-	9799.1	10508	10470	9156.1	9159.2	8264.6	16955	18044	10047	C01904	ko00040,ko01100
mws0213	UPLC-MS/MS	Negative	151.06	71	152.068	C5H12O5	[M-H]-	-	-	Ribitol*	Others	Saccharides and Alcohols	488-81-3	3	-	19946	11409	21593	7067.7	15555	5288.9	16106	11766	15653	C00474	ko00040,ko00740,ko01100
mws0596	UPLC-MS/MS	Positive	154.05	136.04	153.043	C7H7NO3	[M+H]+	-	-	3-Hydroxyanthranilic acid	Organic acids	Organic acids	548-93-6	3	-	128680	120370	116060	120490	137340	117490	200120	194180	150670	C00632	ko00380,ko01100
mws0444	UPLC-MS/MS	Negative	152.04	108	153.043	C7H7NO3	[M-H]-	-	-	3-Aminosalicylic acid	Phenolic acids	Phenolic acids	570-23-0	3	-	5365.6	5642.3	6100.7	10118	4722.6	2508.8	7241.3	12207	8421.6	--	--
mws4002	UPLC-MS/MS	Positive	154.09	137	153.079	C8H11NO2	[M+H]+	-	-	Dopamine	Alkaloids	Alkaloids	51-61-6	1	-	5023200	4734300	3614600	6611600	6319500	6977500	1249300	1014700	1291500	C03758	ko00350,ko00950,ko00965,ko01100,ko01110
mws0639	UPLC-MS/MS	Negative	153.02	109.03	154.027	C7H6O4	[M-H]-	-	-	2,3-Dihydroxybenzoic Acid*	Organic acids	Organic acids	303-38-8	3	-	173330	144900	163150	215260	194460	177840	322900	309570	306390	C00196	ko01110
mws0183	UPLC-MS/MS	Negative	153.02	109.03	154.027	C7H6O4	[M-H]-	-	-	3,4-Dihydroxybenzoic acid (Protocatechuic acid)*	Phenolic acids	Phenolic acids	99-50-3	3	-	130580	167270	153240	177740	136410	141820	271270	287830	305910	C00230	ko01100,ko01110
mws0180	UPLC-MS/MS	Negative	153.02	109.03	154.027	C7H6O4	[M-H]-	-	-	2,5-Dihydroxybenzoic acid; Gentisic Acid*	Phenolic acids	Phenolic acids	490-79-9	3	-	77459	69652	69401	77303	69779	68194	130520	137440	129100	C00628	ko00350,ko01100
Lmgn002473	UPLC-MS/MS	Negative	153.02	109.03	154.027	C7H6O4	[M-H]-	-	-	2,6-Dihydroxybenzoic acid	Phenolic acids	Phenolic acids	303-07-1	3	-	52821	77745	62100	58491	56694	64964	79320	67270	73099	C21298	--
mws0254	UPLC-MS/MS	Positive	156.08	110	155.069	C6H9N3O2	[M+H]+	-	-	L-Histidine	Amino acids and derivatives	Amino acids and derivatives	71-00-1	1	-	153900	134740	124180	229630	299720	352990	93179	103520	61825	C00135	ko00340,ko00410,ko00970,ko01100,ko01110,ko01230,ko02010
pmf0175	UPLC-MS/MS	Negative	157.16	157.2	158.167	C10H22O	[M-H]-	-	-	2-Decanol	Others	Saccharides and Alcohols	1120-06-5	2	-	3096000	3290900	3406800	3583400	3484700	3730900	3323400	3314500	3320500	--	--
pmf0174	UPLC-MS/MS	Negative	157.16	157.2	158.167	C10H22O	[M-H]-	-	-	1-Decanol	Others	Saccharides and Alcohols	112-30-1	2	-	3251500	3463800	3508200	3797600	3746300	3591900	3525000	3350000	3415000	C01633	--
Lmbn001467	UPLC-MS/MS	Negative	158.08	116.07	159.09	C7H13NO3	[M-H]-	-	-	5-Acetamidopentanoic Acid	Organic acids	Organic acids	1072-10-2	3	-	67124	77259	56360	112880	101960	128140	86613	71980	73712	C03087	ko00310,ko01100
pme2589	UPLC-MS/MS	Negative	159.1	87	160.037	C6H8O5	[M-H]-	-	-	2-Oxoadipic acid	Organic acids	Organic acids	3184-35-8	2	-	52734	118690	71425	28441	22973	27781	152440	146650	137590	C00322	ko00300,ko00310,ko00380,ko01100,ko01110,ko01210,ko01230
mws0987	UPLC-MS/MS	Positive	161.06	115	160.052	C10H8O2	[M+H]+	-	-	6-MethylCoumarin	Lignans and Coumarins	Coumarins	92-48-8	2	-	8311.9	4452.4	5957.3	20016	23044	24058	25655	8876.5	19969	--	--
Zmjn001813	UPLC-MS/MS	Negative	159.07	97.06	160.074	C7H12O4	[M-H]-	-	-	Pimelic acid	Organic acids	Organic acids	111-16-0	3	-	8017.8	7482.8	10152	9951.8	5349	15533	2142.5	8027.2	7468.5	C02656	ko00780,ko01100
mws0005	UPLC-MS/MS	Positive	161.11	144	160.1	C10H12N2	[M+H]+	-	-	Tryptamine	Alkaloids	Plumerane	61-54-1	3	-	80221	89123	58189	116710	88695	134130	80996	80453	43140	C00398	ko00380,ko00901,ko01100,ko01110
mws1417	UPLC-MS/MS	Negative	160.04	116	161.048	C9H7NO2	[M-H]-	-	-	Indole-3-carboxylic acid	Alkaloids	Plumerane	771-50-6	3	-	13945	10338	9749.2	11165	8835.2	14262	2782.9	10887	9276.1	C19837	--
mws0102	UPLC-MS/MS	Negative	160.04	116	161.048	C9H7NO2	[M-H]-	-	-	Indole-5-carboxylic acid	Alkaloids	Plumerane	1670-81-1	3	-	3082.1	4942.4	6867.4	12300	5426.2	11358	2330.4	3386.2	4099.7	--	--
mws1550	UPLC-MS/MS	Positive	162.06	73.1	161.051	C6H11NO2S	[M+H]+	-	-	S-Allyl-L-cysteine	Amino acids and derivatives	Amino acids and derivatives	21593-77-1	3	-	22357	22926	21131	18548	17133	9818.6	8208.3	12135	8200.9	C16759	--
pme3382	UPLC-MS/MS	Negative	160.06	98	161.069	C6H11NO4	[M-H]-	-	-	N-Acetyl-L-threonine	Amino acids and derivatives	Amino acids and derivatives	17093-74-2	1	-	21095	36866	37600	45740	42924	36753	56735	71380	54506	--	--
mws1346	UPLC-MS/MS	Positive	162.08	98	161.069	C6H11NO4	[M+H]+	-	-	DL-2-Aminoadipic acid	Alkaloids	Alkaloids	542-32-5	3	-	73752	87654	77684	107160	86794	113600	77296	78606	78867	C00956	ko00300,ko00310,ko00311,ko01100,ko01110,ko01210,ko01230
Lmcp000282	UPLC-MS/MS	Positive	162.11	85.03	161.105	C7H15NO3	[M+H]+	-	-	L-Carnitine	Alkaloids	Alkaloids	541-15-1	3	-	1017600	957090	1458300	1208800	793640	1059800	807260	1425500	1538800	C00318	--
pme2761	UPLC-MS/MS	Negative	161	73	162.016	C5H6O6	[M-H]-	-	-	4-Hydroxy-2-oxoglutaric acid	Organic acids	Organic acids	1187-99-1	2	-	43489	49234	58027	51010	48037	59034	72044	76425	53287	C01127	ko00630,ko01100
pme2914	UPLC-MS/MS	Negative	161.05	99	162.053	C6H10O5	[M-H]-	-	-	3-Hydroxy-3-methylpentane-1,5-dioic acid	Amino acids and derivatives	Amino acids and derivatives	503-49-1	2	-	139820	155860	128470	284300	182050	280410	71478	90171	115810	C03761	--
pmf0440	UPLC-MS/MS	Positive	163.08	91.1	162.068	C10H10O2	[M+H]+	-	-	4-MethoxycinnaMaldehyde	Phenolic acids	Phenolic acids	1963-36-6	2	-	108410	109520	109880	248100	213420	228760	364740	325280	245310	C10475	--
mws1478	UPLC-MS/MS	Positive	163.12	130	162.116	C10H14N2	[M+H]+	-	-	Nicotine	Alkaloids	Alkaloids	54-11-5	1	-	761230	771470	834690	1325900	1059500	1085100	1085000	1084800	854070	C00745	ko00960,ko01110
pme1419	UPLC-MS/MS	Positive	164.07	104	163.067	C6H13NO2S	[M+H]+	-	-	L-Methionine methyl ester	Amino acids and derivatives	Amino acids and derivatives	10332-17-9	1	-	93115	80105	75590	135450	129070	128950	43672	42447	41248	--	--
pme1439	UPLC-MS/MS	Positive	165.05	119	164.047	C9H8O3	[M+H]+	-	-	p-Coumaric acid	Phenolic acids	Phenolic acids	501-98-4	2	-	329790	340860	293160	229520	161590	147500	841790	737760	917260	C00811	ko00130,ko00350,ko00940,ko00950,ko00998,ko01100,ko01110
pmb0142	UPLC-MS/MS	Positive	165.1	95.2	164.047	C9H8O3	[M+H]+	-	-	Caffeic aldehyde	Phenolic acids	Phenolic acids	141632-15-7	2	-	504310	523700	500610	547180	480660	516420	423750	339940	432130	C10945	ko00940,ko01110
MWSmce248	UPLC-MS/MS	Negative	163.04	119.05	164.047	C9H8O3	[M-H]-	-	-	3-Hydroxycinnamic Acid	Others	Others	14755-02-3	1	-	346320	376810	455450	406220	351540	254050	780610	605440	734670	C12621	ko00360,ko01100
mws0159	UPLC-MS/MS	Negative	163.04	91	164.047	C9H8O3	[M-H]-	-	-	Phenylpyruvic acid	Organic acids	Organic acids	156-06-9	2	-	36441	25438	28967	81134	49180	79988	6211	9820	8459.5	C00166	ko00360,ko00400,ko00960,ko01100,ko01110,ko01210,ko01230
Lmmn001643	UPLC-MS/MS	Negative	163.04	119.05	164.047	C9H8O3	[M-H]-	-	-	2-Hydroxycinnamic acid*	Organic acids	Organic acids	583-17-5	1	-	327120	309890	291590	228310	193840	262480	498680	406010	523990	C01772	ko00360,ko00940,ko01100,ko01110
Lmbn002648	UPLC-MS/MS	Negative	163.04	119.05	164.047	C9H8O3	[M-H]-	-	-	α-Hydroxycinnamic Acid*	Phenolic acids	Phenolic acids	5801-57-0	1	-	188790	251100	293920	303780	181830	224060	405810	344690	448830	C02763	ko00360,ko01100
pme2435	UPLC-MS/MS	Negative	163	59	164.068	C6H12O5	[M-H]-	-	-	L-Fucose	Others	Saccharides and Alcohols	2438-80-4	2	-	158270	129970	102590	123040	94533	86159	280560	267150	211290	C01019	ko00051,ko00520,ko01100
mws0898	UPLC-MS/MS	Positive	165.09	105	164.084	C10H12O2	[M+H]+	-	-	Isoeugenol	Phenolic acids	Phenolic acids	97-54-1	3	-	31772	21098	32595	9	9	9	81253	50479	40228	C10469	ko00940
Lmmn004032	UPLC-MS/MS	Negative	163.11	148.06	164.12	C11H16O	[M-H]-	-	-	Cis-Jasmone	Others	Others	488-10-8	3	-	6427.3	10613	10032	18316	13487	12012	8528	7085.8	6006.3	C08490	--
pme3083	UPLC-MS/MS	Negative	164.04	120	165.043	C8H7NO3	[M-H]-	-	-	2-(Formylamino)benzoic acid	Phenolic acids	Phenolic acids	3342-77-6	2	-	411020	413540	406270	275820	207690	224100	1097200	868140	1033500	C05653	ko00380,ko01100
pme2617	UPLC-MS/MS	Positive	166.05	102	165.046	C5H11NO3S	[M+H]+	-	-	L-Methionine Sulfoxide	Amino acids and derivatives	Amino acids and derivatives	3226-65-1	2	-	5767500	5585100	5886300	5515700	6057900	5549300	5730400	5387800	6043000	C02989	ko00270
pme0021	UPLC-MS/MS	Positive	166.09	120.08	165.07	C9H11NO2	[M+H]+	-	-	L-Phenylalanine	Amino acids and derivatives	Amino acids and derivatives	63-91-2	1	-	7158100	6832800	6896900	10502000	8381900	9548800	8238600	8739200	7585700	C00079	ko00360,ko00400,ko00460,ko00940,ko00960,ko00966,ko00970,ko00998,ko01100,ko01110,ko01210,ko01230,ko02010
pmb0037	UPLC-MS/MS	Positive	166.12	121.3	165.115	C10H15NO	[M+H]+	-	-	Hordenine	Alkaloids	Alkaloids	539-15-1	2	-	425800	439660	475100	795930	555760	601260	190690	189610	186650	C06199	ko00350,ko01100
pme0282	UPLC-MS/MS	Negative	165.02	77.04	166.027	C8H6O4	[M-H]-	-	-	Phthalic acid	Organic acids	Organic acids	88-99-3	2	-	31154	40098	41389	60304	68334	62451	28823	46193	41608	C01606	ko01100,ko02010
pme0281	UPLC-MS/MS	Negative	165.02	121.03	166.027	C8H6O4	[M-H]-	-	-	Terephthalic acid	Phenolic acids	Phenolic acids	100-21-0	2	-	371060	470130	438820	783770	606250	595620	281090	343490	307650	C06337	ko01100
pmc0274	UPLC-MS/MS	Positive	167.1	121.1	166.031	C6H6N4S	[M+H]+	-	-	6-Methylmercaptopurine	Nucleotides and derivatives	Nucleotides and derivatives	50-66-8	2	-	6622100	6095900	6286200	9645000	8123800	8847800	7869400	7608100	6580200	C16614	--
mws0344	UPLC-MS/MS	Negative	165.04	75	166.048	C5H10O6	[M-H]-	-	-	D-Xylonic acid	Organic acids	Organic acids	526-91-0	1	-	890100	620700	685400	648360	728150	436710	382040	256880	564080	C00502	ko00040,ko01100
MWSmce637	UPLC-MS/MS	Positive	167.07	135.04	166.063	C9H10O3	[M+H]+	-	-	Methyl anisate	Others	Others	121-98-2	2	-	17441	17582	15643	9	9	9	28248	34589	31936	--	--
Lmbn005172	UPLC-MS/MS	Negative	165.06	119.05	166.063	C9H10O3	[M-H]-	-	-	2,6-Dimethoxybenzaldehyde	Phenolic acids	Phenolic acids	3392-97-0	3	-	10459	10324	9749	9804.5	7906	6673.2	38354	23670	42547	--	--
pmn001681	UPLC-MS/MS	Negative	165.09	149.06	166.099	C10H14O2	[M-H]-	-	-	1-(4-Methoxyphenyl)-1-propanol	Phenolic acids	Phenolic acids	5349-60-0	2	-	17367	20196	25353	21367	21437	20580	19017	20015	19753	--	--
Zmjp000624	UPLC-MS/MS	Positive	168.06	150.05	167.058	C8H9NO3	[M+H]+	-	-	Pyridoxal	Others	Vitamin	66-72-8	3	-	96175	108780	91080	141470	114290	146020	143500	157090	106940	C00250	ko00750,ko01100
NK10253223	UPLC-MS/MS	Positive	168.06	94.06	167.058	C8H9NO3	[M+H]+	-	-	2-Amino-3-methoxybenzoic acid	Phenolic acids	Phenolic acids	3177-80-8	2	-	275660	272790	257450	355950	323040	354180	330310	382620	331640	C05831	ko00380
mws2125	UPLC-MS/MS	Negative	166.98	78.7	167.982	C3H5O6P	[M-H]-	-	-	Phosphoenolpyruvate	Organic acids	Organic acids	138-08-9	3	-	212860	232840	222180	158550	246530	179280	116380	115470	123230	C00074	ko00010,ko00020,ko00400,ko00440,ko00620,ko00710,ko00998,ko01100,ko01110,ko01200,ko01230
Zmsp001834	UPLC-MS/MS	Positive	169.05	65	168.042	C8H8O4	[M+H]+	-	-	2,6-Dimethoxy-1,4-benzoquinone	Quinones	Quinones	530-55-2	2	-	693960	708860	679120	942030	871310	945540	886690	894990	893070	C10331	--
pme2598	UPLC-MS/MS	Negative	167.03	123.04	168.042	C8H8O4	[M-H]-	-	-	3,4-Dihydroxybenzeneacetic acid	Phenolic acids	Phenolic acids	102-32-9	2	-	78019	127140	103460	90646	90912	96961	177520	149300	202400	C01161	ko00350,ko01100
pme1292	UPLC-MS/MS	Negative	167.1	123.04	168.042	C8H8O4	[M-H]-	-	-	Homogentisic acid	Phenolic acids	Phenolic acids	451-13-8	2	-	62446	72799	39733	69966	58835	86627	126240	135940	108340	C00544	ko00130,ko00350,ko01100
Hmbp001276	UPLC-MS/MS	Positive	169.05	65.03	168.042	C8H8O4	[M+H]+	-	-	Gallacetophenone	Phenolic acids	Phenolic acids	528-21-2	2	-	376160	375440	352630	433740	344640	396790	402600	385270	335310	--	--
pme1383	UPLC-MS/MS	Positive	170.08	134.1	169.074	C8H11NO3	[M+H]+	-	-	Pyridoxine	Others	Vitamin	65-23-6	1	-	1489700	1597400	1588900	2618400	2259400	2551700	1260600	1588300	1295400	C00314	ko00750,ko01100
pme0181	UPLC-MS/MS	Positive	170.09	124	169.085	C7H11N3O2	[M+H]+	-	-	3-Methyl-L-Histidine	Amino acids and derivatives	Amino acids and derivatives	368-16-1	1	-	88837	89600	91498	88681	80003	96213	104010	89844	92645	C01152	ko00340,ko01100
Xmbp001692	UPLC-MS/MS	Positive	171.03	81.03	170.022	C7H6O5	[M+H]+	-	-	2,4,6-Trihydroxybenzoic acid	Organic acids	Organic acids	83-30-7	3	-	34205	28065	34173	35633	24509	36079	60599	85537	41665	--	--
mws0024	UPLC-MS/MS	Negative	169.01	125	170.022	C7H6O5	[M-H]-	-	-	Gallic acid	Tannins	Tannin	149-91-7	3	-	73100	76891	79021	68679	44860	61776	89590	96915	84184	C01424	--
ML10176345	UPLC-MS/MS	Negative	171.03	109.03	172.037	C7H8O5	[M-H]-	-	-	3-Dehydroshikimic acid	Organic acids	Organic acids	2922-42-1	3	-	10979	4730.4	6826.8	7468.2	8984	10557	5957.5	8232.8	8210.2	C02637	ko00400,ko01100,ko01110,ko01230
pme0124	UPLC-MS/MS	Positive	173.09	115.5	172.085	C7H12N2O3	[M+H]+	-	-	L-Glycyl-L-proline	Amino acids and derivatives	Amino acids and derivatives	704-15-4	1	-	20196	19227	13456	20728	20099	20505	10522	10890	16675	--	--
Lmbn003524	UPLC-MS/MS	Negative	171.1	99.08	172.11	C9H16O3	[M-H]-	-	-	9-Oxononanoic acid	Organic acids	Organic acids	2553-17-5	3	-	5971.2	7247.4	7491.8	12975	8941.4	8563	7088	7371.2	10591	C16322	ko00592,ko01110
Zmgn004439	UPLC-MS/MS	Negative	171.14	153.14	172.146	C10H20O2	[M-H]-	-	-	Decanoic acid	Organic acids	Organic acids	334-48-5	2	-	5784.6	6291.7	6465.5	11628	8234	9295.8	3542	4899.7	4462.9	C01571	ko00061,ko01100
MWSmce584	UPLC-MS/MS	Positive	138.09	77.04	173.061	C8H11NO	[M-Cl]+	-	-	Tyramine	Amino acids and derivatives	Amino acids and derivatives	60-19-5	1	-	1194900	1105300	1081600	589000	1230400	939160	34952	92669	41285	--	--
pme3009	UPLC-MS/MS	Positive	175.02	99	174.016	C6H6O6	[M+H]+	-	-	Trans-Citridic acid	Organic acids	Organic acids	4023-65-8	2	-	4805400	4898000	4977300	3819100	4800000	4252700	4696700	4352700	5067000	C02341	ko00660,ko01100
MA10039492	UPLC-MS/MS	Negative	173.01	71.03	174.016	C6H6O6	[M-H]-	-	-	Dehydroascorbic acid	Others	Vitamin	490-83-5	2	-	514080	483780	458730	980460	777950	938720	342070	353160	352920	C05422	ko00053,ko00480,ko01100
mws0154	UPLC-MS/MS	Negative	173.05	93	174.053	C7H10O5	[M-H]-	-	-	Shikimic acid	Organic acids	Organic acids	138-59-0	1	-	986600	1291000	1020400	1209500	1111900	1240100	1192300	985240	1422300	C00493	ko00400,ko01100,ko01110,ko01230
mws0242	UPLC-MS/MS	Negative	173.08	111	174.089	C8H14O4	[M-H]-	-	-	Suberic Acid	Organic acids	Organic acids	505-48-6	3	-	24370	21896	20174	33655	32286	48615	14576	15696	19439	C08278	--
Lmgn002555	UPLC-MS/MS	Negative	173.08	59.01	174.089	C8H14O4	[M-H]-	-	-	2-Propylglutaric acid	Organic acids	Organic acids	32806-62-5	3	-	31837	32244	31118	42857	25020	33565	17782	25222	30275	C16658	--
Zmyn000155	UPLC-MS/MS	Negative	173.11	131.08	174.1	C7H14N2O3	[M-H]-	-	-	N-α-Acetyl-L-ornithine	Amino acids and derivatives	Amino acids and derivatives	6205-08-9	3	-	14871	9488	8624.4	11347	10939	12310	7652.8	5854.3	7293	C00437	ko00220,ko01100,ko01110,ko01210,ko01230
mws0260	UPLC-MS/MS	Positive	175.12	116	174.112	C6H14N4O2	[M+H]+	-	-	L-Arginine	Amino acids and derivatives	Amino acids and derivatives	74-79-3	1	-	210440	147390	193950	160240	149160	139850	205380	195910	191180	C00062	ko00220,ko00261,ko00330,ko00472,ko00970,ko01100,ko01110,ko01230,ko02010
pme2559	UPLC-MS/MS	Negative	174.04	88	175.048	C6H9NO5	[M-H]-	-	-	N-Acetyl-L-Aspartic Acid	Amino acids and derivatives	Amino acids and derivatives	997-55-7	2	-	4143.1	7422.7	3763.8	6248.2	5866.8	3610.8	8016.1	1864.4	5249.6	C01042	ko00250,ko01100
pme0008	UPLC-MS/MS	Positive	176.1	113	175.096	C6H13N3O3	[M+H]+	-	-	L-Citrulline	Amino acids and derivatives	Amino acids and derivatives	372-75-8	1	-	14263	16177	29633	5043.5	7900.5	12437	6740.5	21154	5248.7	C00327	ko00220,ko01100,ko01110,ko01230
MWSmce690	UPLC-MS/MS	Negative	175.02	59.01	176.032	C6H8O6	[M-H]-	-	-	Erythorbic Acid; Isoascorbic Acid	Others	Vitamin	89-65-6	2	-	292530	302090	258670	416550	489870	409780	287910	196900	226000	--	--
mws4175	UPLC-MS/MS	Negative	175.02	85.03	176.032	C6H8O6	[M-H]-	-	-	D-Glucurono-6,3-lactone	Others	Saccharides and Alcohols	32449-92-6	2	-	13393	9252.5	11195	264730	227710	217900	19846	9016.5	12896	C02670	ko00053,ko01100
Hmfn000531	UPLC-MS/MS	Negative	175.02	87.01	176.032	C6H8O6	[M-H]-	-	-	L-Ascorbic acid (Vitamin C)	Others	Vitamin	50-81-7	1	-	53273	35179	33521	6006900	4783300	3679200	71309	59743	43499	C00072	ko00053,ko00480,ko01100,ko01110
Zmgn001448	UPLC-MS/MS	Negative	175.06	115.04	176.068	C7H12O5	[M-H]-	-	-	2-Propylmalic Acid*	Organic acids	Organic acids	-	2	-	106430	102490	118270	293930	207550	211000	78088	90718	98384	C05994	ko00620
pmb3101	UPLC-MS/MS	Negative	175.06	115	176.068	C7H12O5	[M-H]-	-	-	2-Isopropylmalic Acid	Organic acids	Organic acids	49601-06-1	2	-	242910	215250	216520	463710	374460	442330	160040	149480	165570	C02504	ko00290,ko00620,ko01100,ko01110,ko01210,ko01230
Lmbn001754	UPLC-MS/MS	Negative	175.06	115.04	176.068	C7H12O5	[M-H]-	-	-	3-Isopropylmalic Acid*	Organic acids	Organic acids	921-28-8	2	-	186350	222110	216690	464080	347330	379320	157630	170030	155210	C04411	ko00290,ko01100,ko01110,ko01210,ko01230
pme2024	UPLC-MS/MS	Positive	177.1	160	176.095	C10H12N2O	[M+H]+	-	-	Serotonin*	Alkaloids	Plumerane	50-67-9	2	-	25185	22152	13794	39568	27254	26260	31267	19813	18405	C00780	ko00380,ko01100
pmb0774	UPLC-MS/MS	Positive	177.1	160.3	176.095	C10H12N2O	[M+H]+	-	-	N-Hydroxytryptamine*	Alkaloids	Phenolamine	-	3	-	22355	19824	24080	29805	27124	32812	18992	16811	14638	C17203	ko00380,ko01100
mws1013	UPLC-MS/MS	Negative	177.02	133.2	178.027	C9H6O4	[M-H]-	-	-	Esculetin	Lignans and Coumarins	Coumarins	305-01-1	2	-	49100	45909	31030	77713	56357	52349	9	9	9	C09263	--
pme1021	UPLC-MS/MS	Negative	177.14	99	178.048	C6H10O6	[M-H]-	-	-	D-Glucono-1,5-lactone	Others	Saccharides and Alcohols	90-80-2	2	-	18370	16839	17652	9	9	9	19054	17626	13211	C00198	ko00030,ko01100,ko01110,ko01200
pmb2795	UPLC-MS/MS	Negative	177	145	178.063	C10H10O3	[M-H]-	-	-	4-Methoxycinnamic acid*	Phenolic acids	Phenolic acids	830-09-1	3	-	34130	35497	36852	55029	56077	55279	25564	31300	32982	--	--
mws1195	UPLC-MS/MS	Positive	179.07	147.1	178.063	C10H10O3	[M+H]+	-	-	p-Coumaric acid methyl ester*	Phenolic acids	Phenolic acids	3943-97-3	1	-	94212	88405	98168	109170	110910	98127	123800	115410	120930	--	--
mws0009	UPLC-MS/MS	Positive	179.07	91	178.063	C10H10O3	[M+H]+	-	-	Coniferaldehyde	Phenolic acids	Phenolic acids	20649-42-7	3	-	21621	18622	8991.1	16290	16500	10347	44948	52662	34182	C02666	ko00940,ko01100,ko01110
pmb0786	UPLC-MS/MS	Positive	180.09	163.06	179.079	C6H13NO5	[M+H]+	-	-	D-Glucosamine	Others	Saccharides and Alcohols	3416-24-8	3	-	748450	2014900	2030800	1139100	1253200	1001000	1743900	492100	1801100	C00329	ko00520,ko01100
pmf0139	UPLC-MS/MS	Negative	179.06	59	180.063	C6H12O6	[M-H]-	-	-	D-Galactose*	Others	Saccharides and Alcohols	59-23-4	2	-	2071700	2195200	1984600	1255500	1391500	1320300	2462600	2052600	2438800	C00124	ko00052,ko01100
pmf0138	UPLC-MS/MS	Negative	179.06	59	180.063	C6H12O6	[M-H]-	-	-	D-Mannose*	Others	Saccharides and Alcohols	3458-28-4	2	-	3193300	3319000	3334200	1749000	2053300	1737200	4116200	3193400	3526100	C00159	ko00051,ko00052,ko00520,ko01100,ko02010
pme0516	UPLC-MS/MS	Negative	179.06	87	180.063	C6H12O6	[M-H]-	-	-	Inositol	Others	Saccharides and Alcohols	87-89-8	1	-	497430	465220	430860	244050	234260	248220	649130	645400	700190	C00137	ko00052,ko00053,ko00562,ko01100,ko01110,ko02010,ko04070
MWSmce576	UPLC-MS/MS	Negative	179.06	59.01	180.063	C6H12O6	[M-H]-	-	-	L-Glucose	Others	Saccharides and Alcohols	921-60-8	1	-	2652100	2623800	2746300	1462800	1620400	1626600	3096700	2611300	3337000	--	--
mws4170	UPLC-MS/MS	Negative	179.06	59.01	180.063	C6H12O6	[M-H]-	-	-	D-Glucose*	Others	Saccharides and Alcohols	14431-43-7	1	-	2899200	2909500	2764700	1588100	1929700	1881400	3507300	2961100	3345900	C00031	ko00010,ko00030,ko00052,ko00500,ko00520,ko00901,ko01100,ko01110,ko02010
mws1164	UPLC-MS/MS	Negative	179.06	59.01	180.063	C6H12O6	[M-H]-	-	-	D-Fructose*	Others	Saccharides and Alcohols	7660-25-5	2	-	3102500	2945300	3104600	1688000	1908800	1966900	4224400	3611400	3453100	C05003	--
mws1198	UPLC-MS/MS	Negative	179.07	73.1	180.079	C10H12O3	[M-H]-	-	-	Methyl 3-(4-hydroxyphenyl)propionate	Phenolic acids	Phenolic acids	5597-50-2	2	-	4835.4	3807.8	4731.5	7305.9	7390.3	7387.1	15581	10389	9816.7	--	--
mws0093	UPLC-MS/MS	Negative	179.07	146	180.079	C10H12O3	[M-H]-	-	-	Coniferyl alcohol	Phenolic acids	Phenolic acids	458-35-5	1	-	53748	66642	64091	124420	103500	109360	74103	72466	83089	C00590	ko00940,ko00998,ko01100,ko01110
Lmbn004847	UPLC-MS/MS	Negative	179.07	146.04	180.079	C10H12O3	[M-H]-	-	-	4-Methoxyphenylpropionic acid	Phenolic acids	Phenolic acids	-	3	-	32931	22030	19006	28404	23874	31830	14656	17054	31124	--	--
Cmyp007180	UPLC-MS/MS	Positive	181.12	107.09	180.115	C11H16O2	[M+H]+	-	-	Dihydroactinidiolide	Others	Others	17092-92-1	1	-	960950	993470	953230	1624300	1289400	1432600	1249900	1438000	1111300	--	--
mws0250	UPLC-MS/MS	Positive	182.08	136.1	181.074	C9H11NO3	[M+H]+	-	-	L-Tyrosine	Amino acids and derivatives	Amino acids and derivatives	60-18-4	1	-	7102900	7493900	8091000	10654000	8595900	10049000	12584000	14522000	13697000	C00082	ko00130,ko00261,ko00350,ko00360,ko00400,ko00460,ko00730,ko00940,ko00950,ko00965,ko00966,ko00970,ko00998,ko01100,ko01110,ko01210,ko01230
mws1350	UPLC-MS/MS	Negative	181.05	151	182.058	C9H10O4	[M-H]-	-	-	Syringaldehyde; 4-Hydroxy-3,5-Dimethoxybenzaldehyde	Phenolic acids	Phenolic acids	134-96-3	1	-	645230	659240	695960	357380	321040	363740	1436100	1360800	1337900	--	--
Lmlp001436	UPLC-MS/MS	Positive	183.07	165.06	182.058	C9H10O4	[M+H]+	-	-	Dihydrocaffeic acid	Phenolic acids	Phenolic acids	1078-61-1	3	-	16022	18530	14903	12976	16795	23442	18402	25464	12123	C10447	ko00350
Hmcn006267	UPLC-MS/MS	Negative	181.05	107.01	182.058	C9H10O4	[M-H]-	-	-	2,6-Dimethoxybenzoic acid	Phenolic acids	Phenolic acids	1466-76-8	3	-	7684.2	8052	8073.1	5222	5296.1	7281.7	14157	13962	12420	--	--
pme2237	UPLC-MS/MS	Negative	181.07	101	182.079	C6H14O6	[M-H]-	-	-	Dulcitol*	Others	Saccharides and Alcohols	608-66-2	2	-	32214	34442	36274	15576	27048	24576	48472	40904	45493	C01697	ko00052,ko01100
mws1155	UPLC-MS/MS	Negative	181.07	101.02	182.079	C6H14O6	[M-H]-	-	-	D-Mannitol*	Others	Saccharides and Alcohols	69-65-8	2	-	6550.5	7527.4	8902	3249.8	3262.5	6627.7	8969.9	3291.4	7936.9	C00392	ko00051,ko01100,ko02010
mws0214	UPLC-MS/MS	Negative	181.07	71	182.079	C6H14O6	[M-H]-	-	-	D-Sorbitol	Others	Saccharides and Alcohols	50-70-4	1	-	27629	35954	24032	10741	21730	14726	46297	33940	47567	C00794	ko00051,ko00052,ko01100,ko02010
pme2596	UPLC-MS/MS	Positive	184.06	148	183.053	C8H9NO4	[M+H]+	-	-	4-Pyridoxic acid	Others	Vitamin	82-82-6	2	-	366500	372930	382100	376100	315440	330620	595940	654420	547230	C00847	ko00750,ko01100
Zmgn000447	UPLC-MS/MS	Negative	184.98	78.96	185.993	C3H7O7P	[M-H]-	-	-	3-Phospho-D-glyceric acid	Others	Saccharides and Alcohols	820-11-1	3	-	510900	482950	550880	388050	527180	445890	241930	239220	313920	C00197	ko00010,ko00030,ko00260,ko00270,ko00561,ko00630,ko00710,ko01100,ko01110,ko01200,ko01230
mws0752	UPLC-MS/MS	Negative	185.15	185.16	186.162	C11H22O2	[M-H]-	-	-	Undecylic Acid	Lipids	Free fatty acids	112-37-8	1	-	493930	528310	479640	751930	612370	685530	403000	389380	438710	C17715	--
Hmmp001310	UPLC-MS/MS	Positive	188.07	118.07	187.063	C11H9NO2	[M+H]+	-	-	3-Indoleacrylic acid	Alkaloids	Alkaloids	1204-06-4	3	-	10245000	11276000	9549200	15927000	12581000	14275000	10298000	10218000	9773600	C21283	--
Hmgp002327	UPLC-MS/MS	Positive	188.07	118.06	187.063	C11H9O2N	[M+H]+	-	-	3-amino-2-naphthoic acid	Alkaloids	Phenolamine	-	1	-	12335000	12863000	12445000	18095000	15647000	17742000	13137000	11691000	11387000	--	--
pmn001492	UPLC-MS/MS	Negative	187.1	123.1	188.041	C11H8O3	[M-H]-	-	-	Ayapin	Lignans and Coumarins	Coumarins	494-56-4	1	-	69592	73477	81768	100760	103570	88801	62734	61373	74242	C18078	--
pme0137	UPLC-MS/MS	Negative	187.07	125	188.08	C7H12N2O4	[M-H]-	-	-	N-Acetyl-L-Glutamine	Amino acids and derivatives	Amino acids and derivatives	2490-97-3	1	-	1219500	1228500	963580	1125900	1181700	1239200	2630000	2655800	1982600	--	--
mws0237	UPLC-MS/MS	Negative	187.1	125	188.105	C9H16O4	[M-H]-	-	-	Azelaic acid	Organic acids	Organic acids	123-99-9	1	-	1077000	1171100	1123700	1645400	1583400	1597200	1109200	1120100	1080200	C08261	--
pme0122	UPLC-MS/MS	Positive	189.12	126	188.116	C8H16N2O3	[M+H]+	-	-	N6-Acetyl-L-lysine	Amino acids and derivatives	Amino acids and derivatives	692-04-6	1	-	447810	436890	423120	1130100	942620	1148600	89171	113320	110660	C02727	ko00310,ko01100
mws5041	UPLC-MS/MS	Positive	189.12	86.1	188.116	C8H16N2O3	[M+H]+	-	-	L-Glycyl-L-isoleucine*	Amino acids and derivatives	Amino acids and derivatives	19461-38-2	3	-	103310	88932	99202	198820	156360	155910	100210	107240	89934	--	--
mws0736	UPLC-MS/MS	Positive	189.12	86	188.116	C8H16N2O3	[M+H]+	-	-	N-Glycyl-L-leucine*	Amino acids and derivatives	Amino acids and derivatives	869-19-2	1	-	124900	122270	117170	273730	183680	214030	125430	125270	107250	C02155	--
Zmjp000182	UPLC-MS/MS	Positive	189.13	70.07	188.127	C7H16N4O2	[M+H]+	-	-	N-Monomethyl-L-arginine	Amino acids and derivatives	Amino acids and derivatives	17035-90-4	3	-	231780	197970	241670	226470	209430	226480	226150	282560	242480	C03884	--
pme3388	UPLC-MS/MS	Positive	189.13	144	188.127	C7H16N4O2	[M+H]+	-	-	Homoarginine	Amino acids and derivatives	Amino acids and derivatives	156-86-5	1	-	38022	38744	32367	30195	44995	39252	35224	35899	33540	C01924	--
pmf0348	UPLC-MS/MS	Negative	187.13	97	188.141	C10H20O3	[M-H]-	-	-	2,6-Dimethyl-7-octene-2,3,6-triol	Others	Saccharides and Alcohols	73815-21-1	2	-	156740	163080	168770	222730	200020	193750	140640	138130	135520	--	--
pme0075	UPLC-MS/MS	Negative	188.06	128	189.064	C7H11NO5	[M-H]-	-	-	N-Acetyl-L-glutamic acid	Amino acids and derivatives	Amino acids and derivatives	1188-37-0	2	-	45709	38783	41568	53660	45819	59239	50165	41250	40579	C00624	ko00220,ko01100,ko01110,ko01210,ko01230
pme2244	UPLC-MS/MS	Positive	190.09	118.07	189.07	C11H11NO2	[M+H]+	-	-	3-Indolepropionic acid	Alkaloids	Plumerane	830-96-6	2	-	18946	22902	18072	17502	20688	19881	17704	15456	17459	--	--
mws0193	UPLC-MS/MS	Positive	190.12	127	189.111	C7H15N3O3	[M+H]+	-	-	L-Homocitrulline	Amino acids and derivatives	Amino acids and derivatives	1190-49-4	1	-	118550	89422	77912	77972	99411	115900	17023	9	9	C02427	--
Zmyn000453	UPLC-MS/MS	Negative	191.02	111.01	192.027	C6H8O7	[M-H]-	-	-	Isocitric Acid	Organic acids	Organic acids	320-77-4	1	-	17509000	17359000	17075000	20549000	20540000	21314000	20224000	17283000	16583000	C00311	ko00020,ko00630,ko01100,ko01110,ko01200,ko01210,ko01230
mws0281	UPLC-MS/MS	Negative	191.02	111.01	192.027	C6H8O7	[M-H]-	-	-	Citric Acid	Organic acids	Organic acids	77-92-9	1	-	1517900	1656200	1603100	1943500	1592200	2163300	1253400	1173000	991480	C00158	ko00020,ko00250,ko00630,ko01100,ko01110,ko01200,ko01210,ko01230
Hmjp002337	UPLC-MS/MS	Positive	193.04	133.03	192.033	C10H8O4	[M+H]+	-	-	Isoscopoletin (6-Hydroxy-7-Methoxycoumarin)	Lignans and Coumarins	Coumarins	776-86-3	2	-	284960	285520	335560	310870	320150	323020	458930	435860	351420	C18079	--
pme2993	UPLC-MS/MS	Positive	193.05	133	192.042	C10H8O4	[M+H]+	-	-	Scopoletin (7-Hydroxy-5-methoxycoumarin)	Lignans and Coumarins	Coumarins	92-61-5	2	-	293510	216470	222000	205200	151640	182600	154270	244990	312910	C01752	ko00940,ko01110
mws0277	UPLC-MS/MS	Negative	191.06	85	192.063	C7H12O6	[M-H]-	-	-	Quinic Acid	Organic acids	Organic acids	77-95-2	1	-	5962300	6773400	6320600	8532400	7666600	8621300	7314300	7057900	5589800	C00296	ko00400,ko01100
Lmmp002080	UPLC-MS/MS	Positive	193.13	105.03	192.126	C11H16N2O	[M+H]+	-	-	N-(4-Aminobutyl)benzamide	Alkaloids	Phenolamine	5692-23-9	2	-	150110	121940	182000	222010	171110	198900	171400	147490	141130	--	--
pme2743	UPLC-MS/MS	Positive	194.08	91	193.074	C10H11NO3	[M+H]+	-	-	N-Phenylacetylglycine	Amino acids and derivatives	Amino acids and derivatives	500-98-1	2	-	28432	23713	27428	35016	27385	31756	13027	12968	16191	C05598	ko00360
mws1189	UPLC-MS/MS	Negative	193.04	72.8	194.033	C6H10O7	[M-H]-	-	-	D-Galacturonic acid*	Organic acids	Organic acids	685-73-4	2	-	78590	75623	58145	70142	55365	75607	84374	73051	79501	C00333	ko00040,ko00053,ko00520,ko01100,ko02010
pme3705	UPLC-MS/MS	Negative	193.04	73	194.043	C6H10O7	[M-H]-	-	-	D-Glucoronic acid*	Others	Saccharides and Alcohols	6556-12-3	2	-	86909	69416	70043	67101	59346	62454	64609	100050	98075	C00191	ko00040,ko00053,ko00520,ko00562,ko01100
pme0422	UPLC-MS/MS	Negative	193.06	134	194.058	C10H10O4	[M-H]-	-	-	Isoferulic Acid*	Phenolic acids	Phenolic acids	537-73-5	2	-	806750	951730	963150	1708700	1478200	1507200	518960	460180	584240	C10470	--
MWSslk097	UPLC-MS/MS	Positive	195.06	163.04	194.058	C10H10O4	[M+H]+	-	-	Dimethyl phthalate	Others	Others	131-11-3	2	-	39544	37909	40666	71120	48532	55082	52755	76923	55857	C11233	--
mws0014	UPLC-MS/MS	Negative	193.05	134.01	194.058	C10H10O4	[M-H]-	-	-	Ferulic acid*	Phenolic acids	Phenolic acids	537-98-4	1	-	931700	967370	1059000	1577300	1348600	1687300	545520	479770	526350	C01494	ko00940,ko01100,ko01110
Lmdn003756	UPLC-MS/MS	Negative	193.05	135.05	194.058	C10H10O4	[M-H]-	-	-	Methyl caffeate	Phenolic acids	Phenolic acids	3843-74-1	3	-	36702	44814	33436	39829	37094	43460	76938	50537	67482	C10477	--
pmp001235	UPLC-MS/MS	Positive	195.14	79.1	194.131	C12H18O2	[M+H]+	-	-	Cinidilide	Others	Others	-	3	-	17534	17446	15353	20180	21774	17490	17786	15470	14411	--	--
pme0534	UPLC-MS/MS	Negative	195.05	74.9	196.058	C6H12O7	[M-H]-	-	-	Gluconic acid	Others	Saccharides and Alcohols	526-95-4	1	-	434480	374990	446690	269620	297040	313710	477540	446180	492480	C00257	ko00030,ko01100,ko01110,ko01200
Hmmn004283	UPLC-MS/MS	Negative	195.07	136.05	196.074	C10H12O4	[M-H]-	-	-	Dihydroferulic Acid	Phenolic acids	Phenolic acids	1135-23-5	3	-	20815	17396	13162	13478	11682	13244	36906	18442	24699	--	--
pme3827	UPLC-MS/MS	Positive	198.08	152.2	197.069	C9H11NO4	[M+H]+	-	-	3,4-Dihydroxy-L-phenylalanine (L-Dopa)	Amino acids and derivatives	Amino acids and derivatives	59-92-7	1	-	2630900	3115700	2972200	3082000	3038900	2990100	3551700	3729800	3661100	C00355	ko00350,ko00950,ko00965,ko01100,ko01110
pmb2497	UPLC-MS/MS	Negative	197	153	198.053	C9H10O5	[M-H]-	-	-	4-Hydroxy-3-methoxymandelate	Phenolic acids	Phenolic acids	55-10-7	3	-	44417	47748	38092	58907	40373	54947	46640	34948	38941	C05584	ko00350,ko01100
mws0027	UPLC-MS/MS	Negative	197.05	123	198.053	C9H10O5	[M-H]-	-	-	Syringic acid	Phenolic acids	Phenolic acids	530-57-4	3	-	16542	12814	14918	6906.2	6399.5	14447	34717	31931	21908	C10833	--
Lmxn008846	UPLC-MS/MS	Negative	197.12	153.13	198.126	C11H18O3	[M-H]-	-	-	Hydroxydihydrobovolide	Others	Others	6067-11-4	1	-	1372900	1367400	1352600	1781800	1329600	1487200	1351900	1339300	1440900	--	--
pmb2640	UPLC-MS/MS	Negative	199.17	199.17	200.178	C12H24O2	[M-H]-	-	-	Dodecanoic acid (Lauric acid)	Lipids	Free fatty acids	143-07-7	1	-	802980	815810	793040	1315700	1130200	1071200	355140	336030	460880	C02679	ko00061,ko01100,ko01110
NK10251888	UPLC-MS/MS	Positive	203.15	70.07	202.143	C8H18N4O2	[M+H]+	-	-	NG,NG-Dimethyl-L-arginine	Amino acids and derivatives	Amino acids and derivatives	30315-93-6	2	-	217290	154490	140700	380140	362300	280890	102420	86202	89083	C03626	--
mws0018	UPLC-MS/MS	Positive	203.22	83	202.216	C10H26N4	[M+H]+	-	-	Spermine	Alkaloids	Phenolamine	71-44-3	3	-	25463000	25530000	24417000	22702000	25104000	26435000	23148000	25051000	24639000	C00750	ko00330,ko00410,ko00480,ko00770,ko01100
Zmbp002538	UPLC-MS/MS	Positive	205.1	146.06	204.09	C11H12N2O2	[M+H]+	-	-	1-Methoxy-indole-3-acetamide	Alkaloids	Alkaloids	-	1	-	29923000	30448000	30643000	41206000	38574000	40887000	30850000	29025000	28658000	--	--
MWSmce056	UPLC-MS/MS	Positive	205.09	146.06	204.09	C11H12N2O2	[M+H]+	-	-	DL-Tryptophan	Amino acids and derivatives	Amino acids and derivatives	54-12-6	1	-	30606000	32823000	32239000	43138000	39114000	42832000	32426000	31851000	30932000	--	--
mws0282	UPLC-MS/MS	Negative	203.08	116.05	204.09	C11H12N2O2	[M-H]-	-	-	L-Tryptophan	Amino acids and derivatives	Amino acids and derivatives	73-22-3	1	-	3581700	3474700	3555400	5240400	4455700	4758400	3010100	3042100	3233000	C00078	ko00260,ko00380,ko00400,ko00901,ko00966,ko00970,ko00998,ko01100,ko01110,ko01210,ko01230
Zmtn001464	UPLC-MS/MS	Negative	204.03	160.04	205.038	C10H7NO4	[M-H]-	-	-	4,8-Dihydroxyquinoline-2-carboxylic acid	Organic acids	Organic acids	59-00-7	3	-	79693	86191	102490	85027	92954	104670	135510	111200	138360	C02470	ko00380
pme1261	UPLC-MS/MS	Positive	206.14	76	205.131	C9H19NO4	[M+H]+	-	-	D-Panthenol	Others	Saccharides and Alcohols	81-13-0	2	-	49026	49111	52891	162180	87839	141950	102380	142290	141930	C05944	ko00770
pmb1587	UPLC-MS/MS	Positive	207.14	165.2	206.131	C13H18O2	[M+H]+	-	-	4-Hydroxy-3,5-diisopropylbenzaldehyde	Phenolic acids	Phenolic acids	10537-86-7	3	-	17738	15278	14095	22756	20297	19259	10938	14110	10865	--	--
Lmln010063	UPLC-MS/MS	Negative	205.16	189.13	206.167	C14H22O	[M-H]-	-	-	2,6-Di-tert-butylphenol*	Phenolic acids	Phenolic acids	128-39-2	2	-	134110	127090	161020	212700	152150	178890	164400	132130	157070	--	--
Lmbn013410	UPLC-MS/MS	Negative	205.16	189.13	206.167	C14H22O	[M-H]-	-	-	2,4-Di-Tert-Butylphenol*	Phenolic acids	Phenolic acids	96-76-4	1	-	145710	110350	147710	167290	132950	154130	179620	111330	167480	--	--
Zmgn002106	UPLC-MS/MS	Negative	206.08	58.03	207.09	C11H13NO3	[M-H]-	-	-	N-Acetyl-L-phenylalanine	Amino acids and derivatives	Amino acids and derivatives	2018-61-3	3	-	84661	88488	90196	109930	93876	137580	101380	108220	92526	C03519	ko00360,ko01100
mws1014	UPLC-MS/MS	Positive	209.04	149.1	208.037	C10H8O5	[M+H]+	-	-	Fraxetin (7,8-Dihydroxy-6-methoxycoumarin)	Lignans and Coumarins	Coumarins	574-84-5	2	-	58286	126010	95292	78161	40112	66959	215280	196510	99207	C09265	--
pme3443	UPLC-MS/MS	Negative	207.07	192	208.074	C11H12O4	[M-H]-	-	-	Sinapinaldehyde	Phenolic acids	Phenolic acids	4206-58-0	2	-	49321	50552	48474	16921	20101	22765	112500	124380	105780	C05610	ko00940,ko01100,ko01110
pmb2620	UPLC-MS/MS	Negative	207.07	133.1	208.074	C11H12O4	[M-H]-	-	-	3,4-Dimethoxycinnamic acid	Phenolic acids	Phenolic acids	14737-89-4	3	-	85837	83138	77016	171920	136970	153840	33563	30648	38425	--	--
mws1212	UPLC-MS/MS	Positive	209.08	177.3	208.074	C11H12O4	[M+H]+	-	-	Methyl ferulate	Phenolic acids	Phenolic acids	2309-07-1	2	-	89485	42197	72784	135090	135800	103580	78790	103880	9	--	--
Lmsn000954	UPLC-MS/MS	Negative	207.09	59.01	208.095	C8H16O6	[M-H]-	-	-	Dambonitol	Others	Saccharides and Alcohols	523-94-4	3	-	38116	42492	40152	47146	34387	31181	66543	70498	70447	--	--
Zmyn000108	UPLC-MS/MS	Negative	209.03	85.03	210.038	C6H10O8	[M-H]-	-	-	D-Saccharic acid*	Others	Saccharides and Alcohols	87-73-0	3	-	120250	101410	103500	71759	98995	70991	139220	150550	149660	C00818	ko00053,ko01100
Zmpn000199	UPLC-MS/MS	Negative	209.03	85.03	210.038	C6H10O8	[M-H]-	-	-	D-Galactaric acid*	Others	Saccharides and Alcohols	526-99-8	3	-	79886	82950	113780	52818	59042	37449	92045	96023	120480	C00879	ko00053,ko01100
mws0853	UPLC-MS/MS	Negative	209.08	179	210.089	C11H14O4	[M-H]-	-	-	Sinapyl alcohol	Phenolic acids	Phenolic acids	537-33-7	1	-	46720	59954	34036	57535	49486	53228	66896	66212	60095	C02325	ko00940,ko01100,ko01110
Lmbn004790	UPLC-MS/MS	Negative	209.08	179.03	210.089	C11H14O4	[M-H]-	-	-	Methyl 3-(3-hydroxy-4-methoxyphenyl)propanoate	Phenolic acids	Phenolic acids	129150-61-4	3	-	49148	38819	38970	61136	51789	57800	72862	52836	46114	--	--
pmb2507	UPLC-MS/MS	Negative	213.1	97	214.024	C5H11O7P	[M-H]-	-	-	2-Deoxyribose-1-phosphate	Nucleotides and derivatives	Nucleotides and derivatives	17210-42-3	3	-	46645	60840	35565	179690	154960	162160	33735	43782	48985	C00672	ko00030,ko00240,ko01100
mws0863	UPLC-MS/MS	Negative	213.02	97	214.024	C5H11O7P	[M-H]-	-	-	2-Deoxyribose-5'-phosphate	Nucleotides and derivatives	Nucleotides and derivatives	102916-66-5	3	-	11727	16692	13869	36442	30408	40294	10951	9318.7	7114.2	C00673	ko00030,ko01100
mws1423	UPLC-MS/MS	Negative	213.09	122	214.099	C14H14O2	[M-H]-	-	-	Dihydropinosylvin	Others	Stilbene	14531-52-3	3	-	5328.8	5300.8	5929	9	9	9	15380	16326	12712	C10254	--
mws0751	UPLC-MS/MS	Negative	213.19	195	214.193	C13H26O2	[M-H]-	-	-	Tridecanoic Acid	Lipids	Free fatty acids	638-53-9	1	-	3368.5	3199.3	2823.4	2171.3	3674.7	1127.1	1755.6	1495.6	2140	C17076	--
pme0170	UPLC-MS/MS	Positive	217.13	158	216.122	C8H16N4O3	[M+H]+	-	-	N-Acetyl-L-Arginine	Amino acids and derivatives	Amino acids and derivatives	155-84-0	2	-	55688	69821	87649	159370	95330	167490	93974	93152	57751	--	--
pme2566	UPLC-MS/MS	Negative	217.08	199	218.09	C8H14N2O5	[M-H]-	-	-	5-L-Glutamyl-L-amino acid	Amino acids and derivatives	Amino acids and derivatives	5875-41-2	2	-	28012	38419	20850	27159	29419	31271	56495	42634	24584	--	--
mws0677	UPLC-MS/MS	Positive	219.11	160	218.106	C12H14N2O2	[M+H]+	-	-	N-Acetyl-5-hydroxytryptamine	Alkaloids	Alkaloids	1210-83-9	3	-	193180	241960	203310	337190	289550	370610	171530	196520	221380	C00978	ko00380,ko01100
mws1337	UPLC-MS/MS	Positive	220.12	202.1	219.111	C9H17NO5	[M+H]+	-	-	D-Pantothenic Acid	Others	Vitamin	79-83-4	1	-	1533500	1471000	1660300	2420600	2055800	2316100	1727200	1729100	1455500	C00864	ko00410,ko00770,ko01100,ko01110
pme1228	UPLC-MS/MS	Positive	221.09	204	220.085	C11H12N2O3	[M+H]+	-	-	5-Hydroxy-L-tryptophan	Amino acids and derivatives	Amino acids and derivatives	56-69-9	2	-	73894	50760	62040	130630	97092	114130	53497	35868	45687	C00643	ko00380,ko01100
pme2755	UPLC-MS/MS	Positive	222	144	221.09	C8H15NO6	[M+H]+	-	-	N-Acetyl-D-glucosamine	Others	Saccharides and Alcohols	7512-17-6	2	-	437960	409260	391410	430920	429460	394020	358640	408710	374430	C00140	ko00520,ko01100,ko02010
mws2608	UPLC-MS/MS	Positive	222.1	84.05	221.09	C8H15NO6	[M+H]+	-	-	N-Acetyl-D-galactosamine	Others	Saccharides and Alcohols	1811-31-0	3	-	24464	25419	38616	35683	34768	27096	29156	31985	12183	C01132	ko00052,ko01100
mws1639	UPLC-MS/MS	Positive	223.06	190.03	222.053	C11H10O5	[M+H]+	-	-	Isofraxidin	Lignans and Coumarins	Coumarins	486-21-5	3	-	18448	19522	25106	19510	17316	20270	30045	41796	36237	C17480	--
mws5042	UPLC-MS/MS	Positive	223.11	120.09	222.1	C11H14N2O3	[M+H]+	-	-	L-Glycyl-L-phenylalanine	Amino acids and derivatives	Amino acids and derivatives	721-66-4	3	-	192350	167970	177230	306300	267310	282520	169780	216060	137820	--	--
MWS4296	UPLC-MS/MS	Positive	223.11	120.08	222.1	C11H14N2O3	[M+H]+	-	-	Glycylphenylalanine	Amino acids and derivatives	Amino acids and derivatives	3321-03-7	3	-	157170	187960	198170	299220	248540	263370	156130	165840	133010	--	--
Hmcp003852	UPLC-MS/MS	Positive	223.21	207.03	222.198	C15H26O	[M+H]+	-	-	Elemol	Terpenoids	Sesquiterpenoids	639-99-6	2	-	4595900	4454200	4127100	3750000	4295400	5663900	4021800	5343000	6140200	--	--
mws0520	UPLC-MS/MS	Positive	224.09	136	223.084	C11H13NO4	[M+H]+	-	-	N-Acetyl-L-tyrosine	Amino acids and derivatives	Amino acids and derivatives	537-55-3	3	-	36611	32313	40313	37133	39763	33840	26425	22230	31419	--	--
Zmln002252	UPLC-MS/MS	Negative	223.03	149.03	224.032	C10H8O6	[M-H]-	-	-	Sideretin (5,7,8-Trihydroxy-6-methoxycoumarin)	Lignans and Coumarins	Coumarins	-	2	-	101300	127940	116100	94296	92602	108490	148290	141630	138640	C22007	--
mws4085	UPLC-MS/MS	Negative	223.06	193	224.068	C11H12O5	[M-H]-	-	-	Sinapic acid	Phenolic acids	Phenolic acids	530-59-6	1	-	89903	129570	108380	79816	73341	83490	136690	124650	136230	C00482	ko00940,ko01100,ko01110
pme0220	UPLC-MS/MS	Positive	225.15	151.11	224.141	C13H20O3	[M+H]+	-	-	Methyl jasmonate	Organic acids	Organic acids	1211-29-6	2	-	17604	20672	17046	39145	23982	18655	33704	31974	20075	C11512	ko00592,ko01110
pmn001493	UPLC-MS/MS	Negative	225.06	169.1	226.063	C14H10O3	[M-H]-	-	-	Dengibsin	Others	Others	97915-33-8	1	-	2145300	2129400	2372400	151150	58841	126560	4372000	5428900	3813800	--	--
Lmqp007004	UPLC-MS/MS	Positive	227.09	195.07	226.084	C11H14O5	[M+H]+	-	-	3,4,5-Trimethoxybenzoic acid methyl ester	Phenolic acids	Phenolic acids	1916-07-0	3	-	8321.4	5946.6	11803	10183	6499.2	7454.6	5980.7	8161.5	8623	--	--
Cmsp002787	UPLC-MS/MS	Positive	227.09	181.05	226.084	C11H14O5	[M+H]+	-	-	3,4'-Dihydroxy-3',5'-dimethoxypropiophenone	Phenolic acids	Phenolic acids	136196-47-9	2	-	868460	688900	904270	273210	327610	394800	1588800	1169600	1219500	--	--
pme0116	UPLC-MS/MS	Positive	227.11	156	226.107	C9H14N4O3	[M+H]+	-	-	L-Carnosine	Amino acids and derivatives	Amino acids and derivatives	305-84-0	2	-	28631	27953	25547	24883	28898	27366	32724	34034	32594	C00386	ko00340,ko00410,ko01100
Lmqp003432	UPLC-MS/MS	Positive	227.16	121.1	226.157	C13H22O3	[M+H]+	-	-	6,9-Dihydroxy-7-megastigmen-3-one	Terpenoids	Sesquiterpenoids	-	2	-	557810	692840	572470	696700	635120	730860	799650	781020	646820	--	--
pmb2643	UPLC-MS/MS	Negative	225.19	207	226.193	C14H26O2	[M-H]-	-	-	Myristoleic acid	Lipids	Free fatty acids	544-64-9	1	-	2413.8	2778.4	3410.3	2893.4	3133	1889.5	3070.2	2790.3	2886.2	C08322	--
pme1194	UPLC-MS/MS	Positive	228.1	112	227.091	C9H13N3O4	[M+H]+	-	-	2'-Deoxycytidine	Nucleotides and derivatives	Nucleotides and derivatives	951-77-9	1	-	35379	32894	39559	66714	44028	57888	50271	71548	40447	C00881	ko00240,ko01100,ko02010
mws0021	UPLC-MS/MS	Negative	227.07	185	228.079	C14H12O3	[M-H]-	-	-	Resveratrol	Others	Stilbene	501-36-0	2	-	435400	484630	436630	24570	13176	23558	978120	1040700	585700	C03582	ko00945,ko01110
Cmsp008043	UPLC-MS/MS	Positive	229.12	105.07	228.115	C15H16O2	[M+H]+	-	-	Dihydropinosylvin methyl ether	Others	Stilbene	17635-59-5	3	-	93148	74586	81188	9	9	9	182120	270220	204760	--	--
mws0119	UPLC-MS/MS	Negative	227.2	227.2	228.209	C14H28O2	[M-H]-	-	-	Myristic Acid	Lipids	Free fatty acids	544-63-8	1	-	35058000	35622000	38793000	24612000	26440000	29030000	13193000	17043000	23882000	C06424	ko00061,ko01100
Zmhn003607	UPLC-MS/MS	Negative	229.09	123.05	230.094	C14H14O3	[M-H]-	-	-	Dihydroresveratrol	Others	Stilbene	58436-28-5	1	-	41405	40864	45987	9	9	9	92542	119060	119690	C10255	--
Cmsn005615	UPLC-MS/MS	Negative	229.09	123.04	230.094	C14H14O3	[M-H]-	-	-	3,3',5-Trihydroxybibenzyl	Others	Stilbene	86630-23-1	1	-	37633	39887	42957	9	9	9	82329	93236	100640	--	--
mws0474	UPLC-MS/MS	Negative	229.14	211	230.152	C12H22O4	[M-H]-	-	-	Dodecanedioic aicd	Organic acids	Organic acids	693-23-2	1	-	2237.4	3554.9	2660	2987.4	2407.1	2473.7	3052.7	2911.8	3539.8	C02678	--
pmb0490	UPLC-MS/MS	Positive	235.14	147.04	234.137	C13H18N2O2	[M+H]+	-	-	p-Coumaroylputrescine	Alkaloids	Phenolamine	34136-53-3	1	-	1268200	1020400	1104300	1593400	1292400	1512600	1276800	1651300	1180500	C18326	ko00330,ko01100
ML10174588	UPLC-MS/MS	Negative	233.16	233.16	234.162	C15H22O2	[M-H]-	-	-	Confertifoline	Terpenoids	Sesquiterpenoids	1811-23-0	2	-	521790	669400	554540	903370	800250	770470	750640	678420	778390	C09376	--
mws4176	UPLC-MS/MS	Positive	237.12	120.09	236.116	C12H16N2O3	[M+H]+	-	-	L-Alanyl-L-Phenylalanine	Amino acids and derivatives	Amino acids and derivatives	3061-90-3	1	-	29745	23502	20017	43649	31931	35391	22845	16766	26576	--	--
Lmhn003240	UPLC-MS/MS	Negative	237.04	121.03	238.048	C11H10O6	[M-H]-	-	-	Benzoylmalic acid	Phenolic acids	Phenolic acids	22138-51-8	3	-	211040	156880	166530	154790	110490	87874	36057	22810	26567	--	--
pmn001669	UPLC-MS/MS	Negative	237.08	147	238.084	C12H14O5	[M-H]-	-	-	Methyl sinapate	Phenolic acids	Phenolic acids	20733-94-2	2	-	91628	94628	96132	89995	84013	79549	104990	91251	103650	--	--
pme0428	UPLC-MS/MS	Negative	237.08	103	238.084	C12H14O5	[M-H]-	-	-	3,4,5-Trimethoxycinnamic acid	Phenolic acids	Phenolic acids	90-50-6	2	-	3560.5	3306.8	3344.2	1829.8	2910.1	1853.6	6450.3	4912.8	7366.1	--	--
MWSslk108	UPLC-MS/MS	Positive	204.13	85.03	239.092	C9H18ClNO4	[M-Cl]+	-	-	O-Acetyl-L-carnitine	Alkaloids	Alkaloids	5080-50-2	2	-	88362	46981	77479	88632	85833	78054	96229	80537	44627	--	--
mws0221	UPLC-MS/MS	Positive	241.03	152	240.024	C6H12N2O4S2	[M+H]+	-	-	L-Cystine	Amino acids and derivatives	Amino acids and derivatives	56-89-3	1	-	37886	37913	42852	26490	31102	30504	60286	74665	22842	C00491	ko00270,ko01100,ko02010
Zmdn011161	UPLC-MS/MS	Negative	239.07	223.03	240.079	C15H12O3	[M-H]-	-	-	Chrysophanol-9-anthrone	Quinones	Quinones	491-58-7	2	-	278850	279790	284790	47920	94410	75744	59189	54717	103320	C10314	--
MWS0552	UPLC-MS/MS	Negative	239.2	223.03	240.209	C15H28O2	[M-H]-	-	-	Cis-10-Pentadecenoic Acid(C15: 1)	Lipids	Free fatty acids	84743-29-3	2	-	325140	389320	426920	75058	108850	102810	103050	77169	115330	--	--
pme2827	UPLC-MS/MS	Negative	239	223	240.245	C16H32O	[M-H]-	-	-	Palmitaldehyde	Lipids	Free fatty acids	629-80-1	2	-	13136000	14029000	14005000	14267000	14507000	16069000	12666000	12073000	13716000	C00517	ko00071
mws1383	UPLC-MS/MS	Positive	243.09	145	242.08	C12H10N4O2	[M+H]+	-	-	Lumichrome	Alkaloids	Alkaloids	1086-80-2	3	-	29937	30940	32959	50303	44755	44258	63368	39439	56338	C01727	ko00740
pme0264	UPLC-MS/MS	Positive	243.1	127	242.09	C10H14N2O5	[M+H]+	-	-	Thymidine	Nucleotides and derivatives	Nucleotides and derivatives	50-89-5	1	-	10366	10964	22637	12059	5999.6	14146	18021	12851	30791	C00214	ko00240,ko01100
pmp001124	UPLC-MS/MS	Positive	243.1	225.09	242.094	C15H14O3	[M+H]+	-	-	Hircinol	Quinones	PhenAnthraquinones	41060-05-3	1	-	27706	25573	20519	31471	17007	33363	38726	55889	32477	C10261	--
MWSslk062	UPLC-MS/MS	Negative	241.09	225.06	242.094	C15H14O3	[M-H]-	-	-	4'-Methoxyresveratrol	Phenolic acids	Phenolic acids	33626-08-3	2	-	147640	152880	141150	18096	42871	20726	312120	333000	293840	--	--
Lmtn005519	UPLC-MS/MS	Negative	241.09	226.06	242.094	C15H14O3	[M-H]-	-	-	4-Methoxy-9,10-dihydrophenanthrene-2,5-diphenol	Quinones	PhenAnthraquinones	-	1	-	438370	468970	440560	427680	339770	528310	794540	853190	633060	--	--
Hmmn007137	UPLC-MS/MS	Negative	241.09	225.05	242.094	C15H14O3	[M-H]-	-	-	3,4′-Dihydroxy-5-methoxystilbene	Others	Stilbene	42438-89-1	2	-	130340	133570	135430	14143	5560.5	7483.2	296700	330240	285420	--	--
Hmlp006377	UPLC-MS/MS	Positive	243.09	225.09	242.094	C15H14O3	[M+H]+	-	-	Coelonin	Quinones	PhenAnthraquinones	82344-82-9	2	-	23613	25799	28432	24618	16762	26776	33156	46238	33635	--	--
Hmlp005401	UPLC-MS/MS	Positive	243.09	225.09	242.094	C15H14O3	[M+H]+	-	-	4,5-Dihydroxy-2-methoxy-9,10-dihydrophenanthrene	Quinones	PhenAnthraquinones	-	2	-	601920	634480	588030	71080	194630	67420	1296000	1400500	970600	--	--
Hmdp007537	UPLC-MS/MS	Positive	243.1	211.07	242.094	C15H14O3	[M+H]+	-	-	Lusianthridin	Quinones	PhenAnthraquinones	87530-30-1	2	-	12577	12108	12031	4628.7	3560.2	4318.7	21895	25299	11930	--	--
Cmsn006847	UPLC-MS/MS	Negative	241.09	226.06	242.094	C15H14O3	[M-H]-	-	-	9,10-Dihydro-2-methoxy-4,5-phenanthrenediol	Quinones	PhenAnthraquinones	70205-50-4	1	-	278560	272620	256300	235670	135490	284640	392000	547000	384900	--	--
MWS2430	UPLC-MS/MS	Negative	241.22	241.21	242.225	C15H30O2	[M-H]-	-	-	13-methylmyristic acid	Lipids	Free fatty acids	2485-71-4	1	-	104750	146030	158510	66184	106760	64235	41952	67059	76545	--	--
mws0359	UPLC-MS/MS	Negative	241.22	241.22	242.225	C15H30O2	[M-H]-	-	-	Pentadecanoic Acid	Lipids	Free fatty acids	1002-84-2	1	-	552490	791460	831270	416920	484820	374310	190720	268820	459640	C16537	--
pme3732	UPLC-MS/MS	Positive	244.09	112	243.086	C9H13N3O5	[M+H]+	-	-	Cytidine	Nucleotides and derivatives	Nucleotides and derivatives	65-46-3	1	-	484520	443630	405240	319210	337850	310910	437970	512950	467250	C00475	ko00240,ko01100,ko02010
ML10180524	UPLC-MS/MS	Positive	244.09	112.05	243.086	C9H13N3O5	[M+H]+	-	-	Cytarabine	Nucleotides and derivatives	Nucleotides and derivatives	147-94-4	2	-	605360	570170	662180	958970	629620	784910	1127200	1151800	1126700	C02961	--
MWSmce295	UPLC-MS/MS	Positive	245.07	113.03	244.07	C9H12N2O6	[M+H]+	-	-	1-beta-D-Arabinofuranosyluracil	Nucleotides and derivatives	Nucleotides and derivatives	3083-77-0	2	-	34976	64156	35990	28984	41131	47043	37296	53245	45176	C16908	--
mws0976	UPLC-MS/MS	Negative	243.06	153	244.07	C9H12N2O6	[M-H]-	-	-	β-Pseudouridine	Nucleotides and derivatives	Nucleotides and derivatives	1445-07-4	3	-	30782	40886	44761	36307	44073	35830	47500	75930	50431	C02067	ko00240,ko01100
mws0248	UPLC-MS/MS	Negative	243.06	110	244.07	C9H12N2O6	[M-H]-	-	-	Uridine	Nucleotides and derivatives	Nucleotides and derivatives	58-96-8	2	-	17206	23786	15300	32267	30397	33056	36735	55230	39742	C00299	ko00240,ko01100,ko02010
Zmsp005190	UPLC-MS/MS	Positive	245.12	121.06	244.11	C15H16O3	[M+H]+	-	-	Batatasin Ⅲ	Others	Others	56684-87-8	2	-	110810	138940	125150	17158	11792	4388.3	237670	288370	210020	--	--
pmf0527	UPLC-MS/MS	Positive	245.12	159.2	244.11	C15H16O3	[M+H]+	-	-	Osthole	Lignans and Coumarins	Coumarins	484-12-8	3	-	47988	53208	49005	27909	21173	29380	93919	100110	97684	C09280	--
MWS5231	UPLC-MS/MS	Negative	243.16	181.16	244.167	C13H24O4	[M-H]-	-	-	Tridecanedioic acid	Organic acids	Organic acids	505-52-2	2	-	69532	63857	68321	98883	92777	72558	69913	73079	78564	--	--
Lmhp003064	UPLC-MS/MS	Positive	245.12	120.08	245.128	C14H16N2O2	[M+H]+	-	-	Cyclo(Pro-Phe)	Amino acids and derivatives	Amino acids and derivatives	3705-26-8	3	-	17691	25704	31291	31807	27502	24618	13894	8970.3	8195.5	C11847	--
pmb2591	UPLC-MS/MS	Negative	245.09	203.2	246.1	C13H14N2O3	[M-H]-	-	-	N-Acetyl-L-Tryptophan	Amino acids and derivatives	Amino acids and derivatives	1218-34-4	1	-	461700	359570	335080	1039200	771230	844790	135600	115620	117950	--	--
Lmrj002087	UPLC-MS/MS	Positive	247.13	86.09	246.121	C10H18N2O5	[M+H]+	-	-	L-Isoleucyl-L-Aspartate	Amino acids and derivatives	Amino acids and derivatives	-	3	-	44107	54895	87017	199280	132470	160880	50500	36304	29495	--	--
pme3961	UPLC-MS/MS	Positive	252.11	136	251.102	C10H13N5O3	[M+H]+	-	-	2'-Deoxyadenosine	Nucleotides and derivatives	Nucleotides and derivatives	958-09-8	1	-	79886	58858	68458	88200	82741	87355	72550	75224	78825	C00559	ko00230,ko01100,ko02010
MWSmce116	UPLC-MS/MS	Positive	252.1	136.06	251.102	C10H13N5O3	[M+H]+	-	-	5'-Deoxyadenosine	Nucleotides and derivatives	Nucleotides and derivatives	4754-39-6	3	-	50627	56288	58874	103070	70913	65207	43551	54053	36900	C05198	--
mws0040	UPLC-MS/MS	Positive	255.07	153	254.058	C15H10O4	[M+H]+	-	-	Chrysin	Flavonoids	Flavonoid	480-40-0	3	-	35624	36859	39562	27635	23183	26184	25826	173650	24857	C10028	ko00941
Hmln005580	UPLC-MS/MS	Negative	253.05	237.02	254.058	C15H10O4	[M-H]-	-	-	Cymbinodin A	Quinones	PhenAnthraquinones	130837-95-5	3	-	10986	11856	11826	9	9	9	35548	28769	24503	--	--
mws0361	UPLC-MS/MS	Negative	253.22	235.19	254.225	C16H30O2	[M-H]-	-	-	Palmitoleic Acid*	Lipids	Free fatty acids	373-49-9	1	-	6394.1	9112	9114.6	7481	9411.6	6052.5	4407	4520.5	7740.8	C08362	ko00061
Lmcn009122	UPLC-MS/MS	Negative	253.22	235.21	254.225	C16H30O2	[M-H]-	-	-	(7Z)-Hexadecenoic acid*	Lipids	Free fatty acids	2416-19-5	1	-	3133.3	1810.8	3729.9	3535	2185.6	1152.3	992.99	522.73	1711.9	--	--
MA10079134	UPLC-MS/MS	Negative	255.03	227.03	256.037	C14H8O5	[M-H]-	-	-	1,2,4-Trihydroxyanthraquinone	Quinones	Anthraquinone	81-54-9	2	-	51884	54487	67295	9	9	9	143460	130910	79906	C10395	--
Zmdn006929	UPLC-MS/MS	Negative	255.07	213.06	256.074	C15H12O4	[M-H]-	-	-	Aloe-Emodin-9-Anthrone	Quinones	Quinones	6247-99-0	2	-	20361	23229	21457	16989	13588	17944	39888	45779	35860	C16760	--
mws0789	UPLC-MS/MS	Negative	255.07	151	256.074	C15H12O4	[M-H]-	-	-	Pinocembrin (Dihydrochrysin)	Flavonoids	Dihydroflavone	480-39-7	2	-	20279	26928	30096	19694	20325	23610	44898	51782	39991	C09827	ko00941
Hmln005329	UPLC-MS/MS	Negative	255.07	239.04	256.074	C15H12O4	[M-H]-	-	-	Ephemeranthoquinone B	Quinones	PhenAnthraquinones	-	3	-	4797.9	5785	6635	7386	2371.6	6263.5	6172.4	5204.9	6328.4	--	--
pma3101	UPLC-MS/MS	Positive	256.2	124.1	256.082	C11H14NO6+	[M+H]+	-	-	Nicotinate D-ribonucleoside	Others	Vitamin	17720-18-2	2	-	9157800	8020000	8486100	9837700	8536400	8483500	9515500	10154000	8880200	C05841	ko00760,ko01100
mws1359	UPLC-MS/MS	Negative	255.1	239	256.11	C16H16O3	[M-H]-	-	-	Pterostilbene	Others	Stilbene	537-42-8	3	-	8578	8216.9	8201	9	9	9	17410	20331	18563	C10287	ko00945
mws1488	UPLC-MS/MS	Negative	255.23	237.22	256.24	C16H32O2	[M-H]-	-	-	Palmitic acid	Lipids	Free fatty acids	57-10-3	1	-	8872.3	13716	14929	7434.2	7785.6	6000.6	4779.3	9385.8	7340.7	C00249	ko00061,ko00062,ko00071,ko00073,ko01040,ko01100,ko01212
mws0120	UPLC-MS/MS	Positive	258.11	104.11	257.103	C8H20NO6P	[M+H]+	-	-	Choline Alfoscerate	Lipids	PC	28319-77-9	3	-	2775900	2856600	3086900	2846600	2894700	2956000	2864300	3020500	3025500	C00670	ko00564,ko00565
MWSslk133	UPLC-MS/MS	Negative	257.18	195.18	258.183	C14H26O4	[M-H]-	-	-	1,14-Tetradecanedioic Acid	Organic acids	Organic acids	821-38-5	2	-	30569	32204	30539	37005	32594	37840	36362	35477	34441	--	--
Zmyn000110	UPLC-MS/MS	Negative	258.04	78.96	259.046	C6H14NO8P	[M-H]-	-	-	D-Glucosamine 1-phosphate	Others	Saccharides and Alcohols	2152-75-2	3	-	10051	11562	14993	16435	12302	13704	7090.8	11557	13519	C06156	ko00520,ko01100
MWS2442	UPLC-MS/MS	Negative	259.02	96.97	260.03	C6H13O9P	[M-H]-	-	-	D-Fructose 6-Phosphate	Others	Saccharides and Alcohols	643-13-0	3	-	1402700	1419200	1354600	1730600	1561300	1660500	1082200	1104200	1163600	C00085	ko00052,ko00500,ko00710,ko01100,ko01110,ko01200
mws1090	UPLC-MS/MS	Negative	259.02	97	260.03	C6H13O9P	[M-H]-	-	-	Glucose-1-phosphate*	Others	Saccharides and Alcohols	59-56-3	1	-	2117400	2055500	2044900	2348500	2393700	2245900	1775600	1748700	1598300	C00103	ko00010,ko00040,ko00052,ko00500,ko00520,ko00523,ko00561,ko01100,ko01110
mws0866	UPLC-MS/MS	Negative	259.02	97	260.03	C6H13O9P	[M-H]-	-	-	D-Glucose 6-phosphate*	Others	Saccharides and Alcohols	56-73-5	3	-	2575500	2509600	2555600	3083000	2796300	2884300	2184600	2046200	2019600	C00092	ko00500,ko00562,ko00998,ko01100,ko01110
Zmhn004045	UPLC-MS/MS	Negative	259.1	137.03	260.105	C15H16O4	[M-H]-	-	-	Tristin	Phenolic acids	Phenolic acids	139101-67-0	1	-	62641	66427	93442	7993.5	8108.4	9032.4	141240	155040	135410	--	--
Zmhn003913	UPLC-MS/MS	Negative	259.1	138.04	260.105	C15H16O4	[M-H]-	-	-	Dendrosinen B	Others	Others	-	1	-	5569500	5612500	5242600	63023	34670	58812	11506000	13939000	12873000	--	--
Zmdp002216	UPLC-MS/MS	Positive	261.14	86.1	260.137	C11H20N2O5	[M+H]+	-	-	L-γ-Glutamyl-L-leucine	Amino acids and derivatives	Amino acids and derivatives	2566-39-4	3	-	28632	37886	18392	51726	41571	66895	7891.8	9	9	--	--
Zmpn000095	UPLC-MS/MS	Negative	261.04	78.96	262.045	C6H15O9P	[M-H]-	-	-	Sorbitol-6-phosphate	Others	Saccharides and Alcohols	20479-58-7	3	-	16444	19755	14371	21161	20722	15391	13548	17624	11464	C01096	ko00051,ko01100
Lmtn004049	UPLC-MS/MS	Negative	263.13	204.12	264.136	C15H20O4	[M-H]-	-	-	Abscisic acid	Organic acids	Organic acids	21293-29-8	3	-	17072	14321	14079	15427	14682	13290	20891	20125	23133	C06082	ko00906,ko01100,ko01110,ko04075
Lmlp003161	UPLC-MS/MS	Positive	265.15	177.06	264.147	C14H20N2O3	[M+H]+	-	-	N-Feruloylputrescine	Alkaloids	Phenolamine	501-13-3	2	-	21794000	23897000	22560000	33726000	28153000	31544000	29893000	32634000	27313000	C10497	ko00330,ko01100
Lmmp002013	UPLC-MS/MS	Positive	267.17	179.07	266.163	C14H22N2O3	[M+H]+	-	-	Dihydroferuloylputrescine	Alkaloids	Phenolamine	-	2	-	530970	476250	473160	736590	485480	574990	487480	616660	430880	--	--
Hmsn000210	UPLC-MS/MS	Negative	133.01	115.01	266.224	C17H30O2	[M-H]-	-	-	Methyl 7,10-hexadecadienoate	Lipids	Free fatty acids	-	3	-	5013600	7247300	3796500	4067600	4943800	3210100	4793000	4565900	2968500	--	--
pme1184	UPLC-MS/MS	Positive	268.1	152	267.097	C10H13N5O4	[M+H]+	-	-	2'-Deoxyguanosine	Nucleotides and derivatives	Nucleotides and derivatives	961-07-9	2	-	104870	108090	113160	219100	155410	179530	109110	120610	105110	C00330	ko00230,ko01100,ko02010
pme0230	UPLC-MS/MS	Positive	268.1	136.06	267.097	C10H13N5O4	[M+H]+	-	-	Adenosine	Nucleotides and derivatives	Nucleotides and derivatives	58-61-7	1	-	14167000	14797000	14760000	17398000	14670000	16153000	18324000	19055000	16988000	C00212	ko00230,ko01100,ko02010
mws1060	UPLC-MS/MS	Negative	267.07	135	268.081	C10H12N4O5	[M-H]-	-	-	9-(Arabinosyl)hypoxanthine	Nucleotides and derivatives	Nucleotides and derivatives	7013-16-3	2	-	26008	27165	28526	51177	46629	39238	20497	26154	28348	--	--
pmp000087	UPLC-MS/MS	Positive	269.1	177.05	268.095	C13H16O6	[M+H]+	-	-	2-Feruloyl-sn-glycerol	Phenolic acids	Phenolic acids	-	2	-	31580	57122	45057	54292	69638	63302	13876	28051	30503	--	--
mws0383	UPLC-MS/MS	Negative	267.23	267.23	268.24	C17H32O2	[M-H]-	-	-	10-Heptadecenoic Acid	Lipids	Free fatty acids	29743-97-3	1	-	35936	52071	38074	16090	17936	16205	8291.4	24077	28937	--	--
pmp000344	UPLC-MS/MS	Positive	271.06	243.06	270.053	C15H10O5	[M+H]+	-	-	3',4',7-Trihydroxyflavone	Flavonoids	Flavonoid	2150-11-0	2	-	7068.8	5251.7	8341.5	9	9	9	14317	10684	9997	--	--
Lmyn006227	UPLC-MS/MS	Negative	269.05	151	270.053	C15H10O5	[M-H]-	-	-	Galangin (3,5,7-Trihydroxyflavone)	Flavonoids	Flavonoid	548-83-4	3	-	6296	9516.2	6310.7	2049.3	1444.8	3067.9	14650	15078	11949	C10044	ko00941
pmp001123	UPLC-MS/MS	Positive	271.1	239.07	270.089	C16H14O4	[M+H]+	-	-	2,5-Dihydroxy-4,9-dimethoxylphenanthrene	Quinones	PhenAnthraquinones	-	2	-	5503.4	8899.5	10807	10925	5591.9	5931.2	11183	8509.5	5724.7	--	--
pmp001122	UPLC-MS/MS	Positive	271.1	239.07	270.089	C16H14O4	[M+H]+	-	-	Denthyrsinin	Others	Others	118169-17-8	2	-	10861	5544	6686.1	8019.9	7705.7	4698.6	10194	12395	11830	--	--
Lmmp005125	UPLC-MS/MS	Positive	271.1	167.03	270.089	C16H14O4	[M+H]+	-	-	Pinostrobin Chalcone	Flavonoids	Chalcones	18956-15-5	3	-	51372	54385	51677	10927	11281	8465.1	142810	174260	108750	--	--
Cmsp007094	UPLC-MS/MS	Positive	271.1	225.09	270.089	C16H14O4	[M+H]+	-	-	Nudol	Quinones	PhenAnthraquinones	86630-46-8	1	-	199040	197820	203550	8707.5	9	4325.6	378890	463870	428090	--	--
MWS20159	UPLC-MS/MS	Positive	271.12	91.05	270.11	C13H18O6	[M+H]+	-	-	Phenyl-β-D-glucopyranoside	Others	Others	-	2	-	26690	25076	19854	9	9	37775	24547	25759	31810	--	--
pmp001119	UPLC-MS/MS	Positive	273.08	213.09	272.068	C15H12O5	[M+H]+	-	-	3,5-Dihydroxy-2,4-dimethoxy-9H-fluoren-9-one	Others	Others	-	1	-	21136	26963	27742	24508	23471	16114	20860	49586	33034	--	--
pme3475	UPLC-MS/MS	Positive	273.08	153	272.068	C15H12O5	[M+H]+	-	-	Butin	Flavonoids	Dihydroflavone	492-14-8	1	-	1052300	1077000	1082100	209870	202170	212200	2808900	3082900	2328100	C09614	ko00941
pme2960	UPLC-MS/MS	Positive	273.08	153	272.068	C15H12O5	[M+H]+	-	-	Naringenin chalcone*	Flavonoids	Chalcones	73692-50-9	1	-	8420000	8440000	7702900	1450400	1323800	1359300	14891000	15539000	13653000	C06561	ko00941,ko01100,ko01110
MWSHY0137	UPLC-MS/MS	Positive	273.08	153.02	272.068	C15H12O5	[M+H]+	-	-	Naringenin (5,7,4'-Trihydroxyflavanone)	Flavonoids	Dihydroflavone	480-41-1	1	-	1119300	1116100	1108300	223700	220380	219970	2737600	3308200	2283900	C00509	ko00941,ko00943,ko01100,ko01110
MWSHY0017	UPLC-MS/MS	Positive	273.08	153.02	272.068	C15H12O5	[M+H]+	-	-	(±)-Naringenin; 4',5,7-Trihydroxyflavanone	Flavonoids	Flavonoid	67604-48-2	1	-	1112200	1119200	1228200	213490	214710	218020	2912400	3237700	2472700	--	--
mws0914	UPLC-MS/MS	Negative	271.06	151	272.068	C15H12O5	[M-H]-	-	-	Pinobanksin*	Flavonoids	Dihydroflavonol	548-82-3	1	-	3911400	3819900	4079300	693480	636420	604480	6771300	6631200	6899800	C09826	ko00941
pme3472	UPLC-MS/MS	Negative	271.09	107.6	272.09	C12H16O7	[M-H]-	-	-	Arbutin	Phenolic acids	Phenolic acids	497-76-7	2	-	457010	422440	426690	456700	454160	465160	648270	731500	591550	C06186	ko00010
MWSmce675	UPLC-MS/MS	Negative	271.08	108.02	272.09	C12H16O7	[M-H]-	-	-	α-Arbutin	Others	Others	84380-01-8	1	-	265020	251100	238060	284630	246100	287790	392470	453390	339880	--	--
pmp001121	UPLC-MS/MS	Positive	273.11	258.09	272.105	C16H16O4	[M+H]+	-	-	2,7-Dihydroxy-3,4,6-trimethoxyphenanthrene	Quinones	PhenAnthraquinones	39499-89-3	3	-	37808	38960	43879	9	9	9	115430	146920	113900	--	--
Cmsp007709	UPLC-MS/MS	Positive	273.11	241.09	272.105	C16H16O4	[M+H]+	-	-	Ephemeranthol B; Flavanthridin	Quinones	PhenAnthraquinones	130827-44-0	1	-	3726200	3826100	4160700	3079500	6850000	2570700	6047900	5483800	3164500	--	--
Cmsp007222	UPLC-MS/MS	Positive	273.11	241.09	272.105	C16H16O4	[M+H]+	-	-	Erianthridin	Quinones	PhenAnthraquinones	101508-48-9	2	-	15151	22666	14224	9	9	9	44307	46848	33302	--	--
Cmsp005585	UPLC-MS/MS	Positive	273.11	195.08	272.105	C16H16O4	[M+H]+	-	-	Ephemeranthol A	Quinones	PhenAnthraquinones	135545-86-7	1	-	1219300	1144300	1059200	9	9	9	2698500	3071900	2840400	--	--
mws1355	UPLC-MS/MS	Negative	271.23	225.22	272.235	C16H32O3	[M-H]-	-	-	16-Hydroxyhexadecanoic acid	Lipids	Free fatty acids	506-13-8	3	-	4214.4	6276.5	2111.5	4292.2	1175.3	2225.1	2913.8	4819.7	4900.5	C18218	ko00073,ko01100
Lmmn003323	UPLC-MS/MS	Negative	271.23	225.22	272.235	C16H32O3	[M-H]-	-	-	2-Hydroxyhexadecanoic acid	Organic acids	Organic acids	764-67-0	1	-	990390	1012100	1144100	429960	343920	380620	871770	929440	1536000	--	--
pmp001264	UPLC-MS/MS	Positive	274.27	256.27	273.267	C16H35NO2	[M+H]+	-	-	Hexadecylsphingosine	Lipids	Sphingolipids	-	1	-	1231500	1173100	1168700	1368600	1216400	1205700	1263700	1094900	1304600	--	--
pme1201	UPLC-MS/MS	Negative	273.08	167	274.084	C15H14O5	[M-H]-	-	-	Phloretin	Flavonoids	Chalcones	60-82-2	1	-	1850300	1811900	1841600	142720	105520	132190	4003500	4305300	3824900	C00774	ko00941,ko01110
Cmsp006710	UPLC-MS/MS	Positive	275.13	137.06	274.12	C16H18O4	[M+H]+	-	-	3',4-Dihydroxy-3,5'-dimethoxybibenzyl	Others	Stilbene	83088-28-2	2	-	674570	712390	733500	625750	669760	656480	1128600	1101800	959160	--	--
Zmhn004964	UPLC-MS/MS	Negative	273.11	137.03	274.121	C16H18O4	[M-H]-	-	-	3,4-Dihydroxy-5,4'-dimethoxybibenzyl	Phenolic acids	Phenolic acids	-	1	-	6024400	6513900	6275200	125810	55185	71990	13281000	14834000	13058000	--	--
Zmhn004470	UPLC-MS/MS	Negative	273.11	137.03	274.121	C16H18O4	[M-H]-	-	-	Gigantol(4',5-dihydroxy-3,3-dimethoxybibenzyl)	Others	Others	67884-30-4	1	-	114610	104950	106950	9	9	9	260730	285860	300570	--	--
pmp001125	UPLC-MS/MS	Positive	275.13	151.08	274.121	C16H18O4	[M+H]+	-	-	Dendrobin A	Others	Others	-	1	-	467920	482730	497190	431660	412050	385590	785680	760250	705670	--	--
Lmtp005493	UPLC-MS/MS	Positive	275.13	135.08	274.121	C16H18O4	[M+H]+	-	-	4,4'-Dihydroxy-3,5-dimethoxybibenzyl	Phenolic acids	Phenolic acids	39499-96-2	1	-	23654000	22921000	21954000	474130	216280	284280	39558000	46011000	38600000	C10256	--
pmb0034	UPLC-MS/MS	Positive	277.1	114.7	276.096	C10H16N2O7	[M+H]+	-	-	L-α-Glutamyl-L-Glutamic Acid	Amino acids and derivatives	Amino acids and derivatives	3929-61-1	2	-	28887	30555	31840	29772	23474	22261	56586	55190	52110	C01425	--
pme1712	UPLC-MS/MS	Negative	275	257	276.132	C11H20N2O6	[M-H]-	-	-	L-Saccharopine	Amino acids and derivatives	Amino acids and derivatives	997-68-2	2	-	35158	27737	31561	44122	41132	26394	25059	19458	18402	C00449	ko00300,ko00310,ko01100,ko01110,ko01230
pmb1574	UPLC-MS/MS	Positive	277.2	93	276.209	C18H28O2	[M+H]+	-	-	9,12-Octadecadien-6-Ynoic Acid	Lipids	Free fatty acids	61481-29-6	3	-	59836	75671	61510	84104	73010	76284	55609	52970	57714	--	--
mws1038	UPLC-MS/MS	Negative	277.12	146	278.13	C11H22N2O4S	[M-H]-	-	-	Pantetheine	Others	Others	496-65-1	1	-	55406	57499	52264	110120	90511	103530	103080	102530	79560	C00831	ko00332,ko00770,ko01110
MWSmce341	UPLC-MS/MS	Positive	279.16	149.03	278.152	C16H22O4	[M+H]+	-	-	Butyl isobutyl phthalate	Others	Others	17851-53-5	2	-	22204000	24287000	24101000	33565000	31471000	27998000	31102000	26553000	28242000	--	--
Lmxp011770	UPLC-MS/MS	Positive	279.16	149.02	278.152	C16H22O4	[M+H]+	-	-	Diisobutyl phthalate*	Phenolic acids	Phenolic acids	84-69-5	1	-	23067000	26149000	24773000	34726000	32079000	29323000	31261000	27169000	27441000	C15205	--
Lmlp012720	UPLC-MS/MS	Positive	279.16	149.02	278.152	C16H22O4	[M+H]+	-	-	Dibutyl phthalate*	Phenolic acids	Phenolic acids	84-74-2	1	-	23076000	26473000	25552000	33210000	34017000	30182000	32656000	28502000	27571000	C14214	--
Lmhp003013	UPLC-MS/MS	Positive	279.17	177.05	278.163	C15H22N2O3	[M+H]+	-	-	N-Feruloyl-Cadaverine	Alkaloids	Phenolamine	-	3	-	42373	59058	41830	49248	41125	26463	89232	111140	84424	--	--
pmp001133	UPLC-MS/MS	Positive	279.23	173.13	278.193	C17H28NO2+	[M+H]+	-	-	N-Methyldendrobine	Alkaloids	Sesquiterpene alkaloids	-	1	-	6926.2	8923.3	6613	9114.6	8415.1	9018.2	24096	14229	15049	--	--
pmb1650	UPLC-MS/MS	Positive	279.2	149.4	278.225	C18H30O2	[M+H]+	-	-	Octadeca-11E,13E,15Z-trienoic acid	Lipids	Free fatty acids	25575-00-2	3	-	14376000	16125000	16800000	21949000	20684000	18767000	20068000	17025000	18111000	--	--
pmb0889	UPLC-MS/MS	Positive	279.23	95.1	278.225	C18H30O2	[M+H]+	-	-	Punicic acid (9Z,11E,13Z-octadecatrienoic acid)	Lipids	Free fatty acids	544-72-9	1	-	2380500	2463200	2476400	2549500	2299100	2563000	4320700	4102500	3577100	C08364	--
MWSmce692	UPLC-MS/MS	Negative	277.22	59.01	278.225	C18H30O2	[M-H]-	-	-	γ-Linolenic Acid	Lipids	Free fatty acids	506-26-3	1	-	300980	319780	330840	332810	328910	308230	203440	230060	281840	C06426	ko00591,ko01040,ko01100
mws0367	UPLC-MS/MS	Negative	277.22	277.22	278.225	C18H30O2	[M-H]-	-	-	α-Linolenic Acid	Lipids	Free fatty acids	463-40-1	1	-	19837000	19221000	23232000	19705000	19357000	19651000	10135000	11216000	16128000	C06427	ko00592,ko01040,ko01100,ko01110
Lmbn005923	UPLC-MS/MS	Negative	277.22	59.01	278.225	C18H30O2	[M-H]-	-	-	Crepenynic acid	Lipids	Free fatty acids	2277-31-8	1	-	346490	307570	353060	332520	329060	317700	203000	205630	268900	C07289	ko00591
Lmhn003223	UPLC-MS/MS	Negative	279.05	147.04	280.058	C13H12O7	[M-H]-	-	-	Cinnamoyltartaric acid	Phenolic acids	Phenolic acids	-	3	-	517270	546160	674460	377720	371730	324740	102950	74932	93251	--	--
Lmhn002926	UPLC-MS/MS	Negative	279.05	163.04	280.058	C13H12O7	[M-H]-	-	-	p-Coumaroylmalic acid	Phenolic acids	Phenolic acids	-	3	-	27917	37188	21726	50231	39607	46812	14582	11608	19434	--	--
mws0629	UPLC-MS/MS	Positive	281.11	166	280.106	C13H16N2O5	[M+H]+	-	-	L-Aspartyl-L-Phenylalanine	Amino acids and derivatives	Amino acids and derivatives	13433-09-5	1	-	22768	23185	31118	46837	38488	53802	33196	42165	34040	--	--
mws1491	UPLC-MS/MS	Negative	279.23	279.23	280.24	C18H32O2	[M-H]-	-	-	Linoleic acid	Lipids	Free fatty acids	60-33-3	1	-	40466000	49894000	51440000	41092000	38869000	39371000	20063000	22648000	35868000	C01595	ko00591,ko01040,ko01100
Lmbn006152	UPLC-MS/MS	Negative	279.23	59.01	280.24	C18H32O2	[M-H]-	-	-	(9Z,11E)-Octadecadienoic acid	Lipids	Free fatty acids	2540-56-9	1	-	16608	18048	15773	14648	17317	20264	7501.5	11214	14518	C04056	ko00591
Hmhp001812	UPLC-MS/MS	Positive	282.12	136.06	281.112	C11H15N5O4	[M+H]+	-	-	2'-O-Methyladenosine	Nucleotides and derivatives	Nucleotides and derivatives	2140-79-6	3	-	61950	65352	64115	88244	66130	77333	61774	62903	68555	--	--
YC512118	UPLC-MS/MS	Positive	282.28	247.24	281.272	C18H35NO	[M+H]+	-	-	Oleamide (9-Octadecenamide)	Lipids	Free fatty acids	301-02-0	1	-	10464	14524	17891	13263	9719.8	8312	12524	5968.3	9469.3	C19670	--
mws2623	UPLC-MS/MS	Negative	281.25	281.25	282.256	C18H34O2	[M-H]-	-	-	11-Octadecanoic acid(Vaccenic acid)	Lipids	Free fatty acids	506-17-2	1	-	881840	1339000	1303000	558560	586540	249620	523390	706120	690270	C21944	--
Lmyn012331	UPLC-MS/MS	Negative	281.25	281.25	282.256	C18H34O2	[M-H]-	-	-	Petroselinic acid	Lipids	Free fatty acids	593-39-5	2	-	1000800	1455700	1355200	532480	541640	292310	545480	708430	771370	C08363	--
pme1178	UPLC-MS/MS	Positive	284.1	152	283.092	C10H13N5O5	[M+H]+	-	-	Guanosine	Nucleotides and derivatives	Nucleotides and derivatives	118-00-3	1	-	7689100	7748500	7653500	10421000	8147000	10191000	11386000	13377000	11619000	C00387	ko00230,ko01100,ko02010
Zmwp005562	UPLC-MS/MS	Positive	284.13	147.04	283.121	C17H17NO3	[M+H]+	-	-	cis-N-p-Coumaroyltyramine	Alkaloids	Alkaloids	-	1	-	505970	542650	514640	200140	157740	171400	1853400	693360	1029900	--	--
MWSmce089	UPLC-MS/MS	Positive	284.12	147.04	283.121	C17H17NO3	[M+H]+	-	-	p-Coumaroyltyramine	Lignans and Coumarins	Coumarins	36417-86-4	1	-	504320	520640	552800	196460	131760	194500	1816300	702280	962000	--	--
mws1628	UPLC-MS/MS	Negative	283.03	239	284.024	C15H8O6	[M-H]-	-	-	Rhein	Quinones	Anthraquinone	478-43-3	3	-	7069.5	11095	10709	18794	15239	11581	7159.8	8479.3	6454.7	C10401	--
Lmhn002051	UPLC-MS/MS	Negative	283.05	167.04	284.053	C12H12O8	[M-H]-	-	-	Vnilloylmalic acid	Phenolic acids	Phenolic acids	-	3	-	10452	25638	23112	9	20705	21130	9	7096.9	9	--	--
Zmhp008540	UPLC-MS/MS	Positive	285.08	242.06	284.068	C16H12O5	[M+H]+	-	-	Denbinobin	Quinones	PhenAnthraquinones	82526-36-1	1	-	8247500	8828100	8739200	297010	513880	413530	16450000	17714000	14662000	--	--
pmp001126	UPLC-MS/MS	Positive	285.08	257.08	284.068	C16H12O5	[M+H]+	-	-	7-Hydroxy-5,6-dimethoxy-1,4-phenanthrenequinone	Quinones	PhenAnthraquinones	-	3	-	31148	37214	36201	11810	8794.4	11714	61305	63814	45496	--	--
pmp000416	UPLC-MS/MS	Positive	285.08	229.08	284.068	C16H12O5	[M+H]+	-	-	3'-Methoxydaidzein	Flavonoids	Isoflavones	21913-98-4	2	-	148570	154040	138130	5779.1	9277.4	6962.8	325100	372470	284590	--	--
pme3233	UPLC-MS/MS	Positive	285.08	270	284.068	C16H12O5	[M+H]+	-	-	Calycosin	Flavonoids	Isoflavones	20575-57-9	2	-	8986	7353.7	7432	9	9	9	15675	20566	15614	C01562	ko00943,ko01110
MWSHY0196	UPLC-MS/MS	Positive	285.08	242.06	284.068	C16H12O5	[M+H]+	-	-	Genkwanin (Apigenin 7-methyl ether)	Flavonoids	Flavonoid	437-64-9	2	-	8124700	8487500	8154400	290570	512280	413130	15577000	17420000	14305000	C10046	--
MWS20170	UPLC-MS/MS	Negative	283.06	253.02	284.068	C16H12O5	[M-H]-	-	-	3-hydroxy-1,2-dimethoxy-anthraquinone	Quinones	Anthraquinone	10383-62-7	2	-	10670	10966	13126	9	9	9	20630	23448	19362	--	--
mws0918	UPLC-MS/MS	Negative	283.06	268	284.068	C16H12O5	[M-H]-	-	-	Prunetin (5,4'-Dihydroxy-7-methoxyisoflavone)	Flavonoids	Isoflavones	552-59-0	3	-	92175	91580	93359	5152.4	6510	4181.8	211970	215110	191770	C10521	ko00943
mws0051	UPLC-MS/MS	Positive	285.08	270	284.068	C16H12O5	[M+H]+	-	-	Acacetin	Flavonoids	Flavonoid	480-44-4	1	-	21188	24950	22228	9	9	9	61436	65187	50307	C01470	ko00944
mws0668	UPLC-MS/MS	Negative	283.07	151	284.076	C10H12N4O6	[M-H]-	-	-	Xanthosine	Nucleotides and derivatives	Nucleotides and derivatives	146-80-5	1	-	544800	467450	537910	489930	429430	459510	1113300	1210900	1057200	C01762	ko00230,ko00232,ko01100,ko01110,ko02010
pmn001491	UPLC-MS/MS	Negative	283.16	59	284.162	C15H24O5	[M-H]-	-	-	Dendrobiumane D	Others	Others	-	3	-	374740	484050	440740	653830	693290	757590	352110	403460	339680	--	--
Zmyn005026	UPLC-MS/MS	Negative	283.26	283.26	284.272	C18H36O2	[M-H]-	-	-	16-Methylheptadecanoic acid	Lipids	Free fatty acids	2724-58-5	2	-	2873800	2301800	2764500	15214000	3567700	7147900	24042000	4415200	7005200	C20356	--
mws1489	UPLC-MS/MS	Negative	283.26	283.26	284.272	C18H36O2	[M-H]-	-	-	Stearic Acid	Lipids	Free fatty acids	57-11-4	1	-	7293300	5674200	6112200	36176000	9414500	17529000	57574000	11581000	16612000	C01530	ko00061,ko01040
pma1751	UPLC-MS/MS	Positive	286.09	124	285.085	C12H15NO7	[M+H]+	-	-	N-(beta-D-Glucosyl)nicotinate	Others	Vitamin	-	2	-	121940	105670	98023	69207	57781	49252	222850	252050	237500	--	--
Zmhn003247	UPLC-MS/MS	Negative	285.04	257.05	286.048	C15H11O6	[M-H]-	-	-	6-Hydroxy-Emodin	Quinones	Anthraquinone	-	3	-	17674	18598	13512	3805.3	6938	5683.6	29819	32577	27135	--	--
pme0088	UPLC-MS/MS	Negative	285.04	151	286.048	C15H10O6	[M-H]-	-	-	Luteolin (5,7,3',4'-Tetrahydroxyflavone)	Flavonoids	Flavonoid	491-70-3	2	-	7072.6	9743	6419.2	10419	8157	7090.5	8530.1	12744	11167	C01514	ko00941,ko00944,ko01100,ko01110
mws1068	UPLC-MS/MS	Negative	285.04	151	286.048	C15H10O6	[M-H]-	-	-	Kaempferol (3,5,7,4'-Tetrahydroxyflavone)	Flavonoids	Flavonols	520-18-3	1	-	2405.4	3336.2	3062.8	2141.2	2796.8	4703.9	3077.7	3288.2	2857.9	C05903	ko00941,ko00944,ko01100,ko01110
pmn001511	UPLC-MS/MS	Negative	285.1	123	286.105	C13H18O7	[M-H]-	-	-	3-Hydroxy-5-Methylphenol-1-O-Glucoside	Phenolic acids	Phenolic acids	-	3	-	87044	78146	72353	32248	25836	31823	155230	201810	167510	--	--
mws1521	UPLC-MS/MS	Negative	285.1	121.03	286.105	C13H18O7	[M-H]-	-	-	Salicin	Phenolic acids	Phenolic acids	138-52-3	3	-	76886	73938	86952	142060	123350	111410	51031	9	9	C01451	ko00010
MWSslk132	UPLC-MS/MS	Negative	285.21	223.21	286.214	C16H30O4	[M-H]-	-	-	Hexadecanedioic acid	Organic acids	Organic acids	505-54-4	2	-	48980	42600	47853	54295	43607	52470	63280	60627	62897	C19615	ko00073,ko01100
mws4017	UPLC-MS/MS	Negative	285.22	285.22	286.23	C20H30O	[M-H]-	-	-	Ferruginol	Terpenoids	Ditepenoids	514-62-5	3	-	12549	9819.5	15110	7312.3	6825.2	4964.7	10661	10978	18623	C09092	ko00904,ko01110
Zmyn005252	UPLC-MS/MS	Negative	285.24	239.24	286.251	C17H34O3	[M-H]-	-	-	3-Hydroxy-palmitic acid methyl ester	Others	Others	51883-36-4	3	-	35573	39343	42249	16165	11170	9581.1	19415	25508	49706	C11849	--
mws1094	UPLC-MS/MS	Negative	287.06	259	288.063	C15H12O6	[M-H]-	-	-	Aromadendrin (Dihydrokaempferol)	Flavonoids	Dihydroflavonol	480-20-6	2	-	3598.8	1243.6	2347.5	2062.4	1641.3	2756.9	3861.6	3601.2	4141.7	C00974	ko00941,ko01100,ko01110
mws0064	UPLC-MS/MS	Negative	287.06	135	288.063	C15H12O6	[M-H]-	-	-	Eriodictyol (5,7,3',4'-Tetrahydroxyflavanone)	Flavonoids	Dihydroflavone	552-58-9	1	-	160040	155620	143970	14407	13708	9474.5	369650	400250	323940	C05631	ko00941,ko01100,ko01110
Jmgn005927	UPLC-MS/MS	Negative	287.06	125.03	288.063	C15H12O6	[M-H]-	-	-	2-hydroxynaringenin	Flavonoids	Flavonoid	-	3	-	6145.5	6409.2	4710.7	9	9	9	9701.1	10727	10343	--	--
Lmtp006213	UPLC-MS/MS	Positive	289.14	135.08	288.136	C17H20O4	[M+H]+	-	-	3'-Hydroxy-3,4,5-trimethoxybibenzyl	Phenolic acids	Phenolic acids	-	1	-	696890	632910	672590	35645	31397	26887	1780800	2234000	1647900	--	--
MWS0434	UPLC-MS/MS	Negative	287.2	269.21	288.209	C19H28O2	[M-H]-	-	-	Trans dehydrorosinone	Others	Others	53-43-0	2	-	64849	78682	77710	18629	33151	20924	88802	85756	76030	--	--
pmn001686	UPLC-MS/MS	Negative	287.22	241.22	288.23	C16H32O4	[M-H]-	-	-	10,16-Dihydroxypalmitic acid	Lipids	Free fatty acids	3233-90-7	2	-	4938.8	5372.7	5348.8	2081.4	3559.8	2060.7	7192.8	7073.4	7690.5	C08285	ko00073
Lmyn007883	UPLC-MS/MS	Negative	287.22	287.22	288.23	C16H32O4	[M-H]-	-	-	9,16-Dihydroxypalmitic acid	Lipids	Free fatty acids	38076-49-2	2	-	34050	34954	35929	8812.6	16778	10435	33985	43220	37796	--	--
pmb3081	UPLC-MS/MS	Negative	289	97	290.004	C6H11PO11	[M-H]-	-	-	Glucarate O-Phosphoric acid	Others	Saccharides and Alcohols	-	3	-	1587100	1261200	1288600	960550	841110	765210	1328500	769560	1064600	--	--
pme3163	UPLC-MS/MS	Negative	289	97	290.04	C7H15O10P	[M-H]-	-	-	D-Sedoheptuiose 7-phosphate	Others	Saccharides and Alcohols	2646-35-7	2	-	1069400	1358200	1073200	594680	923220	690510	821370	799080	725250	--	--
Zmhn004017	UPLC-MS/MS	Negative	289.11	138.03	290.115	C16H18O5	[M-H]-	-	-	Dendrocandin C	Phenolic acids	Phenolic acids	-	1	-	1036900	1017500	1113500	40989	30914	27717	2306900	2871900	2193500	--	--
pmb2657	UPLC-MS/MS	Negative	289.1	97.1	290.123	C10H18N4O6	[M-H]-	-	-	Argininosuccinic acid	Organic acids	Organic acids	2387-71-5	3	-	121310	113690	114960	168730	148270	127990	93279	89483	95175	C03406	ko00220,ko00250,ko01100,ko01110,ko01230
pmb0885	UPLC-MS/MS	Positive	291	190.9	290.188	C18H26O3	[M+H]+	-	-	4-Oxo-9Z,11Z,13E,15E-Octadecatetraenoic Acid	Lipids	Free fatty acids	-	3	-	152470	154560	151070	228400	189000	206050	171070	146790	130250	--	--
pmf0314	UPLC-MS/MS	Negative	289.25	157	290.261	C20H34O	[M-H]-	-	-	(+)-cis-Abienol	Others	Saccharides and Alcohols	17990-16-8	2	-	8430.5	6346	9730.4	9249.9	7787	8286	8192	11102	7607	--	--
Zmyn004548	UPLC-MS/MS	Negative	291.2	235.17	292.204	C18H28O3	[M-H]-	-	-	12-Oxo-phytodienoic acid	Lipids	Free fatty acids	85551-10-6	2	-	26611	26598	24290	48838	40982	50114	18270	20622	20287	C01226	ko00592,ko01100,ko01110
pmb0494	UPLC-MS/MS	Positive	295.17	207.07	294.158	C15H22N2O4	[M+H]+	-	-	Sinapoylputrescine	Alkaloids	Phenolamine	70185-57-8	3	-	48380	39927	41126	60460	50572	51199	77429	54441	55013	--	--
Zmyn004732	UPLC-MS/MS	Negative	293.21	185.12	294.219	C18H30O3	[M-H]-	-	-	2R-hydroxy-9Z,12Z,15Z-octadecatrienoic acid	Others	Others	-	3	-	14898	19679	14022	20172	18370	20314	18962	15176	14890	C16342	ko00592
Zmyn004676	UPLC-MS/MS	Negative	293.21	113.1	294.219	C18H30O3	[M-H]-	-	-	17-Hydroxylinolenic acid	Others	Others	-	2	-	303430	330320	302160	332610	281000	347990	459650	406420	457720	C16346	ko00592
Zmpn003368	UPLC-MS/MS	Negative	293.21	195.14	294.219	C18H30O3	[M-H]-	-	-	13S-Hydroxy-9Z,11E,15Z-octadecatrienoic acid	Lipids	Free fatty acids	87984-82-5	2	-	226000	252580	236120	290680	235560	255710	358890	356550	353250	C16316	ko00592
pmb2792	UPLC-MS/MS	Negative	293.21	193.1	294.219	C18H30O3	[M-H]-	-	-	13-Hydroxy-6,9,11-octadecatrienoic acid	Lipids	Free fatty acids	74784-20-6	3	-	51836	49300	54990	190240	83801	106160	226300	72762	187140	--	--
pmb2787	UPLC-MS/MS	Negative	293.21	275.1	294.219	C18H30O3	[M-H]-	-	-	9-Oxo-10E,12Z-octadecadienoic acid	Lipids	Free fatty acids	54232-59-6	2	-	20137	29133	22269	39394	33895	38232	24822	22370	24177	C14766	ko00591
pmb2786	UPLC-MS/MS	Negative	293.21	235.17	294.219	C18H30O3	[M-H]-	-	-	9-Hydroxy-10,12,15-octadecatrienoic acid*	Lipids	Free fatty acids	89886-42-0	2	-	22979	24234	21893	44603	36588	37989	19841	17053	17430	C16326	ko00592
Lmbn005443	UPLC-MS/MS	Negative	293.21	235.17	294.219	C18H30O3	[M-H]-	-	-	13-KODE; (9Z,11E)-13-Oxooctadeca-9,11-dienoic acid*	Lipids	Free fatty acids	54739-30-9	3	-	21552	23165	18892	40503	33479	35932	21489	19556	19485	C14765	ko00591
Hmqp005455	UPLC-MS/MS	Positive	297.24	81.07	296.234	C18H32O3	[M+H]+	-	-	15(R)-Hydroxylinoleic Acid*	Lipids	Free fatty acids	177931-23-6	3	-	87543	103390	86216	111910	113610	112340	104080	97255	95928	--	--
Hmqp005411	UPLC-MS/MS	Positive	297.24	81.07	296.234	C18H32O3	[M+H]+	-	-	9-Oxo-12Z-Octadecenoic acid*	Lipids	Free fatty acids	112543-32-5	3	-	88568	107190	90050	101170	110430	127460	105910	106000	90677	--	--
Rfmb091	UPLC-MS/MS	Negative	295.23	195.14	296.235	C18H32O3	[M-H]-	-	-	9S-Hydroxy-10E,12Z-octadecadienoic acid*	Lipids	Free fatty acids	15514-85-9	1	-	849700	873560	836700	816380	700720	794080	1375000	1271800	1371800	C14767	ko00591
pmb2799	UPLC-MS/MS	Negative	295.23	195.2	296.235	C18H32O3	[M-H]-	-	-	12,13-Epoxy-9-Octadecenoic Acid	Lipids	Free fatty acids	6799-85-5	1	-	12037	13650	11180	17571	18264	15880	10762	12167	12585	C14826	ko00591,ko01100
Lmbn005662	UPLC-MS/MS	Negative	295.23	171.1	296.235	C18H32O3	[M-H]-	-	-	9(10)-EpOME;(9R,10S)-(12Z)-9,10-Epoxyoctadecenoic acid	Lipids	Free fatty acids	16833-56-0	3	-	20975	21288	19969	23318	28217	30805	21333	20422	23291	C14825	ko00591,ko01100
Lmbn005369	UPLC-MS/MS	Negative	295.23	195.14	296.235	C18H32O3	[M-H]-	-	-	13(S)-HODE;13(S)-Hydroxyoctadeca-9Z,11E-dienoic acid*	Lipids	Free fatty acids	10219-69-9	2	-	718400	785920	708320	729490	593240	670980	1268600	1154100	1235800	C14762	ko00591
pme1474	UPLC-MS/MS	Positive	298.1	136	297.09	C11H15N5O3S	[M+H]+	-	-	5'-Deoxy-5'-(methylthio)adenosine	Nucleotides and derivatives	Nucleotides and derivatives	2457-80-9	1	-	19363000	19712000	19003000	22001000	20636000	22572000	17046000	13017000	14350000	C00170	ko00270,ko00908,ko01100
pmb0197	UPLC-MS/MS	Positive	298.1	166.3	297.107	C11H15N5O5	[M+H]+	-	-	N7-Methylguanosine	Nucleotides and derivatives	Nucleotides and derivatives	20244-86-4	2	-	295260	285790	266750	499880	411610	456340	325150	444070	326040	C20674	--
Lmsn003588	UPLC-MS/MS	Negative	297.08	282.05	298.084	C17H14O5	[M-H]-	-	-	Pterocarpine	Flavonoids	Isoflavones	524-97-0	2	-	3128.8	1208.5	2148	9	9	9	5381.4	3509.9	4395	--	--
Hmyn000254	UPLC-MS/MS	Negative	297.12	59.01	298.12	C18H18O4	[M-H]-	-	-	Tababiphenyl C	Others	Others	1644433-50-0	2	-	244960	248350	233050	198090	206800	231060	977510	1017000	612760	--	--
Zmyn004714	UPLC-MS/MS	Negative	297.24	183.14	298.251	C18H34O3	[M-H]-	-	-	Ricinoleic acid	Lipids	Free fatty acids	141-22-0	2	-	31249	35498	29801	36277	29627	30769	42103	43884	39706	C08365	--
pmf0297	UPLC-MS/MS	Negative	297.32	183.1	298.324	C20H42O	[M-H]-	-	-	1-Eicosanol	Lipids	Free fatty acids	629-96-9	2	-	36012	34508	28038	43092	35746	39552	50867	47410	48108	--	--
mws0724	UPLC-MS/MS	Negative	298.08	208	299.087	C10H13N5O6	[M-H]-	-	-	8-Hydroxyguanosine	Nucleotides and derivatives	Nucleotides and derivatives	3868-31-3	3	-	7124.9	5009	7338.7	12993	9100	7799.5	8756.9	13023	13335	--	--
ML10195036	UPLC-MS/MS	Positive	300.3	60.05	299.282	C18H37NO2	[M+H]+	-	-	3-Dehydrosphinganine	Lipids	Sphingolipids	16105-69-4	2	-	6803.1	7001.4	4318.5	7038.6	7823.3	5140.4	1640	2313.1	4408.5	C02934	ko00600,ko01100
MA10012327	UPLC-MS/MS	Positive	300.29	60.04	299.282	C18H37NO2	[M+H]+	-	-	D-Sphingosine	Lipids	Sphingolipids	123-78-4	2	-	20085	16751	18270	13357	12926	8028.5	4623.7	3673.4	11243	C00319	ko00600,ko01100
Zmhp003514	UPLC-MS/MS	Positive	301.07	286.05	300.063	C16H12O6	[M+H]+	-	-	6,7,8-Tetrahydroxy-5-methoxyflavone	Flavonoids	Flavonoid	-	3	-	7703.1	10563	11737	13459	12932	12034	9770.2	19595	10025	--	--
pmp001127	UPLC-MS/MS	Positive	301.07	286.08	300.063	C16H12O6	[M+H]+	-	-	Chrysoeriol*	Flavonoids	Flavonoid	491-71-4	3	-	31199	27334	25550	34175	27744	29400	53717	60512	40770	C04293	ko00944
pmp000548	UPLC-MS/MS	Positive	301.07	286.04	300.063	C16H12O6	[M+H]+	-	-	Pratensein	Flavonoids	Isoflavones	2284-31-3	2	-	8644.1	7339.9	11010	10219	11495	9839.3	8240.8	19485	9424.2	C10520	ko00943
pmp000001	UPLC-MS/MS	Positive	301.07	286.05	300.063	C16H12O6	[M+H]+	-	-	Hispidulin (5,7,4'-Trihydroxy-6-methoxyflavone)*	Flavonoids	Flavonoid	1447-88-7	2	-	30318	30110	33572	31663	26708	23069	39955	52906	39704	C10058	--
mws0058	UPLC-MS/MS	Negative	299.06	284	300.063	C16H12O6	[M-H]-	-	-	Diosmetin (5,7,3'-Trihydroxy-4'-methoxyflavone)*	Flavonoids	Flavonoid	520-34-3	2	-	40155	37513	33548	41777	26273	32601	50393	59129	52055	C10038	--
Lmmp005689	UPLC-MS/MS	Positive	301.07	258.05	300.063	C16H12O6	[M+H]+	-	-	Cajanin	Flavonoids	Isoflavones	32884-36-9	3	-	11663	10783	7330.9	4512.9	7136.6	4392.9	10436	11100	13035	C10203	--
Lmjp004941	UPLC-MS/MS	Positive	301.07	286.05	300.063	C16H12O6	[M+H]+	-	-	Rhamnocitrin (7-Methylkaempferol)*	Flavonoids	Flavonoid	569-92-6	3	-	11877	9128.2	8280.4	15019	11707	9697.8	9818.1	19490	14271	C17059	--
Lmhn004976	UPLC-MS/MS	Negative	299.06	284.02	300.063	C16H12O6	[M-H]-	-	-	Aracarpene 2	Flavonoids	Isoflavones	-	2	-	25618	34624	28756	34830	19958	31024	47849	44025	44153	--	--
Zmhn001926	UPLC-MS/MS	Negative	299.08	137.02	300.084	C13H16O8	[M-H]-	-	-	1-O-Salicyl-D-glucose	Phenolic acids	Phenolic acids	60517-74-0	2	-	11937000	12351000	13563000	11625000	13361000	10352000	19734000	18860000	17213000	--	--
Zmhn001358	UPLC-MS/MS	Negative	299.08	137.02	300.084	C13H16O8	[M-H]-	-	-	4-O-Glucosyl-4-hydroxybenzoic acid	Phenolic acids	Phenolic acids	-	2	-	321650	361010	316840	324030	326280	320760	525270	479960	498450	--	--
pmb3142	UPLC-MS/MS	Negative	299.1	137.1	300.085	C13H16O8	[M-H]-	-	-	Salicylic acid-2-O-glucoside	Phenolic acids	Phenolic acids	10366-91-3	3	-	3378400	3430600	3260800	4072700	3537000	3935900	4405400	5177400	4523000	--	--
Hmtn001302	UPLC-MS/MS	Negative	299.08	137.02	300.085	C13H16O8	[M-H]-	-	-	Glucosyloxybenzoic acid	Phenolic acids	Phenolic acids	-	2	-	15076000	14699000	14559000	14029000	12012000	12693000	18315000	18952000	16625000	--	--
Zmmp009258	UPLC-MS/MS	Positive	301.11	167.04	300.1	C17H16O5	[M+H]+	-	-	Naringenin-4',7-dimethyl ether	Flavonoids	Flavonoid	29424-96-2	2	-	1398600	1438100	1404400	1841700	1547500	1587900	1974400	1946200	1555400	--	--
mws2367	UPLC-MS/MS	Negative	299.11	119	300.121	C14H20O7	[M-H]-	-	-	Salidroside	Phenolic acids	Phenolic acids	10338-51-9	3	-	109450	101380	127440	118670	74205	123180	177140	132790	186320	C06046	ko00350,ko01100
Hmyn001360	UPLC-MS/MS	Negative	299.11	59.01	300.135	C18H20O4	[M-H]-	-	-	Doitungbiphenyl A	Phenolic acids	Phenolic acids	-	2	-	317150	267810	287720	261440	266000	281750	429190	463010	560840	--	--
pme2816	UPLC-MS/MS	Positive	301.2	209.2	300.209	C20H28O2	[M+H]+	-	-	4-Oxoretinol	Others	Vitamin	62702-55-0	2	-	19679	22820	23034	22427	16444	18614	24031	24939	17631	C16683	--
Cmmn012461	UPLC-MS/MS	Negative	299.2	299.2	300.209	C20H28O2	[M-H]-	-	-	Dehydroabietic acid	Terpenoids	Ditepenoids	1740-19-8	2	-	196340	183440	196300	229870	216200	181750	217160	201330	205450	--	--
Zmyn005384	UPLC-MS/MS	Negative	299.26	253.26	300.266	C18H36O3	[M-H]-	-	-	2R-Hydroxyoctadecanoic Acid	Lipids	Free fatty acids	26633-48-7	2	-	39609	38522	44849	21766	32024	17778	12775	16990	23046	C03042	--
MWS5235	UPLC-MS/MS	Negative	299.26	253.25	300.266	C18H36O3	[M-H]-	-	-	12-Hydroxyoctadecanoic acid	Lipids	Free fatty acids	106-14-9	2	-	11967	14423	11825	18890	16932	17556	17140	12987	12993	--	--
MWS4295	UPLC-MS/MS	Negative	299.26	253.25	300.266	C18H36O3	[M-H]-	-	-	DL-2-hydroxystearic acid	Lipids	Free fatty acids	629-22-1	2	-	42875	46737	55713	25768	37632	18508	13015	17601	26010	--	--
Lmqn008288	UPLC-MS/MS	Negative	299.26	299.26	300.267	C18H36O3	[M-H]-	-	-	3-Hydroxyoctadecanoic Acid	Lipids	Free fatty acids	45261-96-9	1	-	17838	17276	20260	22274	26546	24409	19796	22346	22878	--	--
pmb3079	UPLC-MS/MS	Negative	300.05	96.9	301.056	C8H16NO9P	[M-H]-	-	-	N-Acetyl-D-glucosamine-1-phosphate	Others	Saccharides and Alcohols	6866-69-9	3	-	20651	17070	14831	3537.5	11784	10085	24469	19482	26111	C04256	--
MWSHY0029	UPLC-MS/MS	Positive	303.05	229.05	302.043	C15H10O7	[M+H]+	-	-	Quercetin	Flavonoids	Flavonoid	117-39-5	2	-	128410	137860	132480	144080	134670	122250	150150	133310	124770	C00389	ko00941,ko00944,ko01100,ko01110
Hmcn002875	UPLC-MS/MS	Negative	301.04	255.02	302.043	C15H10O7	[M-H]-	-	-	6-Hydroxyluteolin	Flavonoids	Flavonoid	18003-33-3	3	-	24155	28320	25377	33914	28777	32326	25637	28457	26880	C10072	--
mws1033	UPLC-MS/MS	Positive	303.09	153.02	302.079	C16H14O6	[M+H]+	-	-	Homoeriodictyol	Flavonoids	Dihydroflavone	446-71-9	2	-	15381	29117	16188	12077	3217.1	10747	44347	49809	34394	C09756	ko00941
mws0463	UPLC-MS/MS	Negative	301.07	164	302.079	C16H14O6	[M-H]-	-	-	Hesperetin	Flavonoids	Dihydroflavone	520-33-2	3	-	7457.7	6339.1	5873.7	3346.8	782.72	2485.9	14242	18379	18372	C01709	ko00941
Cmsp007228	UPLC-MS/MS	Positive	303.09	167.03	302.079	C16H14O6	[M+H]+	-	-	7-O-Methyleriodictyol	Flavonoids	Flavanols	51857-11-5	2	-	81310	72902	67369	9	9	9	200910	244470	184330	--	--
Cmsp004086	UPLC-MS/MS	Positive	303.09	229.08	302.079	C16H14O6	[M+H]+	-	-	Dihydrokaempferide	Flavonoids	Flavonols	137225-59-3	2	-	224370	200720	135620	263770	218940	298110	154850	98346	83332	--	--
Zmhn000892	UPLC-MS/MS	Negative	301.09	139.05	302.1	C13H18O8	[M-H]-	-	-	4-O-Glucosyl-3,4-dihydroxybenzyl alcohol	Phenolic acids	Phenolic acids	-	2	-	509760	484830	511590	630400	588040	631820	745730	830000	736540	--	--
Hmqn000843	UPLC-MS/MS	Negative	301.09	123.01	302.1	C13H18O8	[M-H]-	-	-	Tachioside	Lignans and Coumarins	Lignans	109194-60-7	2	-	3045500	3021100	2944500	4778600	4143700	4915000	3057000	2764500	3003900	--	--
MWSmce549	UPLC-MS/MS	Positive	303.25	57.07	302.246	C17H34O4	[M+H]+	-	-	1-Monomyristin	Lipids	Free fatty acids	589-68-4	1	-	1563200	1932200	1937300	1862400	1538800	1618100	2371200	1859300	2459100	--	--
mws1375	UPLC-MS/MS	Positive	304.15	185.09	303.143	C12H21N3O6	[M+H]+	-	-	Nicotianamine	Amino acids and derivatives	Amino acids and derivatives	34441-14-0	1	-	9239.8	7295.3	10557	25602	32707	49450	10698	10408	8932	C05324	--
mws0044	UPLC-MS/MS	Negative	303.05	125.02	304.058	C15H12O7	[M-H]-	-	-	Dihydroquercetin(Taxifolin)	Flavonoids	Dihydroflavonol	480-18-2	1	-	117180	131000	108020	41584	34606	43924	226110	206860	157920	C01617	ko00941,ko01100,ko01110
Lmtp004909	UPLC-MS/MS	Positive	305.14	151.07	304.131	C17H20O5	[M+H]+	-	-	Moscatilin (4,4'-Dihydroxy-3,3',5-Trimethoxybibenzyl)	Phenolic acids	Phenolic acids	108853-14-1	1	-	79658	83944	110780	9	9	9	264770	260490	205150	--	--
pme1373	UPLC-MS/MS	Negative	306.05	110	307.057	C9H14N3O7P	[M-H]-	-	-	2'-Deoxycytidine-5'-monophosphate	Nucleotides and derivatives	Nucleotides and derivatives	1032-65-1	2	-	9027	5812	7800.2	9	9	9	20114	23570	20356	C00239	ko00240,ko01100
pme1086	UPLC-MS/MS	Negative	306.08	143	307.084	C10H17N3O6S	[M-H]-	-	-	Glutathione reduced form	Amino acids and derivatives	Amino acids and derivatives	70-18-8	1	-	17250	14735	31151	36807	50563	41018	37453	49062	27811	C00051	ko00270,ko00480,ko01100,ko02010
pmn001610	UPLC-MS/MS	Negative	307.26	307.3	308.272	C20H36O2	[M-H]-	-	-	Eicosadienoic acid	Lipids	Free fatty acids	5598-38-9	1	-	156130	238550	201430	32925	47833	33795	29560	58102	62444	C16525	ko01040
Lmhn003074	UPLC-MS/MS	Negative	309.06	193.05	310.069	C14H14O8	[M-H]-	-	-	Feruloylmalic acid	Phenolic acids	Phenolic acids	-	3	-	271570	328540	309060	858810	526160	599570	42452	22491	29155	--	--
pmb2791	UPLC-MS/MS	Negative	309.21	209.1	310.1	C18H30O4	[M-H]-	-	-	9-Hydroperoxy-10E,12,15Z-octadecatrienoic acid	Lipids	Free fatty acids	111004-08-1	3	-	41186	43433	47530	123970	63639	104980	114500	94081	86402	C16321	ko00592,ko01110
pmp001214	UPLC-MS/MS	Positive	310.16	251.09	310.147	C16H24NO5+	[M]+	-	-	Sinapine	Alkaloids	Alkaloids	18696-26-9	2	-	2080900	2178300	2129700	4089400	3421500	3590000	1636300	1623900	1408000	C00933	ko00940
Zmzn003953	UPLC-MS/MS	Negative	309.2	227.2	310.214	C18H30O4	[M-H]-	-	-	13(s)-hydroperoxy-(9z,11e,15z)-octadecatrienoic acid	Others	Others	67597-26-6	1	-	776150	829520	998580	428600	544010	601540	259610	401460	563510	C04785	ko00592,ko01100,ko01110
Zmyn004449	UPLC-MS/MS	Negative	309.21	171.1	310.214	C18H30O4	[M-H]-	-	-	9-Hydroxy-12-oxo-10(E),15(Z)-octadecadienoic acid	Others	Others	-	2	-	15004	16549	14208	22556	14786	22135	20764	17638	18494	C21923	ko00592,ko01110
pmn001606	UPLC-MS/MS	Negative	309.28	309.28	310.287	C20H38O2	[M-H]-	-	-	Eicosenoic acid	Lipids	Free fatty acids	26764-41-0	1	-	38724	23276	22274	9	28941	15334	9	14538	22781	C16526	ko01040
Hmtn001358	UPLC-MS/MS	Negative	310.09	148.04	311.101	C14H17NO7	[M-H]-	-	-	2-(D-Glucosyloxy)-4-hydroxybenzeneacetonitrile	Alkaloids	Alkaloids	-	2	-	58318	66157	56120	85060	81820	113540	58538	61360	65782	--	--
pme3967	UPLC-MS/MS	Positive	312.13	180	311.123	C12H17N5O5	[M+H]+	-	-	2-(Dimethylamino)guanosine	Nucleotides and derivatives	Nucleotides and derivatives	2140-67-2	2	-	841490	839090	885540	1079000	932800	1087000	1177400	1337000	952550	--	--
Lmcp002302	UPLC-MS/MS	Positive	312.13	180.09	311.123	C12H17N5O5	[M+H]+	-	-	N6-(2-Hydroxyethyl)adenosine	Nucleotides and derivatives	Nucleotides and derivatives	4338-48-1	3	-	673180	763040	720920	1034800	901150	893060	1122900	1082700	1038800	--	--
Rfmb087	UPLC-MS/MS	Negative	311.22	293.21	312.23	C18H32O4	[M-H]-	-	-	9-Hydroxy-13-oxo-10-octadecenoic Acid	Lipids	Free fatty acids	-	3	-	61030	67186	75923	86032	68453	101240	107690	81083	102170	--	--
pmn001689	UPLC-MS/MS	Negative	311.22	223.17	312.23	C18H32O4	[M-H]-	-	-	9-Hydroxy-12-oxo-15(Z)-octadecenoic acid	Lipids	Free fatty acids	-	2	-	48672	52252	45374	67736	58164	63655	49136	45430	47723	C21924	ko00592,ko01110
pmb2804	UPLC-MS/MS	Negative	311.1	171.3	312.23	C18H32O4	[M-H]-	-	-	13S-Hydroperoxy-9Z,11E-octadecadienoic acid	Lipids	Free fatty acids	33964-75-9	3	-	11032	12942	10157	11239	10378	14206	12026	10385	8600.6	C04717	ko00591,ko01100
MWS80007	UPLC-MS/MS	Negative	311.22	249.22	312.23	C18H32O4	[M-H]-	-	-	13-Hydroperoxy-9Z,11E-octadecadienoic acid	Lipids	Free fatty acids	23017-93-8	2	-	3779.6	2923.6	5141.9	6371.6	3318.5	4825.7	7044.5	5927.6	5288.8	--	--
MWS80006	UPLC-MS/MS	Negative	311.22	293.21	312.23	C18H32O4	[M-H]-	-	-	9-Hydroperoxy-9Z,11E-Octadecadienoic Acid	Lipids	Free fatty acids	5502-91-0	2	-	12686	16025	15431	11104	14029	14737	10861	10439	15919	C14827	ko00591,ko01100
Lmbn005287	UPLC-MS/MS	Negative	311.22	249.22	312.23	C18H32O4	[M-H]-	-	-	7S,8S-DiHODE; (9Z,12Z)-(7S,8S)-Dihydroxyoctadeca-9,12-dienoic acid	Lipids	Free fatty acids	143288-65-7	2	-	4107	5863.5	5902.6	5484.2	4991.8	4433.3	5273.7	5826.9	6053.2	C07354	ko00591
Lmbn004685	UPLC-MS/MS	Negative	311.22	223.17	312.23	C18H32O4	[M-H]-	-	-	5S,8R-DiHODE; (5S,8R,9Z,12Z)-5,8-Dihydroxyoctadeca-9,12-dienoate	Lipids	Free fatty acids	-	3	-	26525	29708	25686	68089	38349	60416	81858	62282	75593	C20186	ko00591
MWStz221	UPLC-MS/MS	Positive	314.14	177.06	313.131	C18H19NO4	[M+H]+	-	-	N-Cis-Feruloyltyramine	Alkaloids	Alkaloids	80510-09-4	1	-	3066600	2991100	3137800	388440	235340	354910	14233000	2747300	3549500	--	--
mws1433	UPLC-MS/MS	Positive	314.14	177.05	313.131	C18H19NO4	[M+H]+	-	-	N-Feruloyltyramine	Alkaloids	Phenolamine	66648-43-9	1	-	3073900	3230600	3173200	457500	243770	335030	13733000	2718000	3386700	C02717	--
pmp000161	UPLC-MS/MS	Positive	315.09	271.06	314.079	C17H14O6	[M+H]+	-	-	5,2'-Dihydroxy-7,8-dimethoxyflavone	Flavonoids	Flavonoid	41060-16-6	2	-	11618	12888	15546	8772.2	6607.9	7516.3	20487	20686	20736	--	--
mws1174	UPLC-MS/MS	Negative	313.07	253	314.079	C17H14O6	[M-H]-	-	-	3-O-Acetylpinobanksin	Flavonoids	Dihydroflavonol	52117-69-8	1	-	62861	68351	65192	80357	63602	67766	87298	138090	85288	C16418	ko00941
Lmyn002403	UPLC-MS/MS	Negative	313.09	101.02	314.1	C14H18O8	[M-H]-	-	-	Mandelic acid-β-glucoside	Phenolic acids	Phenolic acids	-	2	-	85582	87965	77186	122090	88819	122130	148110	139330	137840	--	--
Lmmn002179	UPLC-MS/MS	Negative	313.09	107.05	314.1	C14H18O8	[M-H]-	-	-	Methyl salicylate-2-O-glucoside	Phenolic acids	Phenolic acids	10019-60-0	3	-	10174	31476	23725	17113	19594	18606	44907	51452	41056	--	--
Lmbn005487	UPLC-MS/MS	Negative	313.24	251.24	314.246	C18H34O4	[M-H]-	-	-	12,13-DHOME; (9Z)-12,13-Dihydroxyoctadec-9-enoic acid	Lipids	Free fatty acids	263399-35-5	2	-	44971	48867	46289	43384	42826	40790	46885	36206	52127	C14829	ko00591
Zmzp004111	UPLC-MS/MS	Positive	317.06	302.04	316.058	C16H12O7	[M+H]+	-	-	Selagin	Flavonoids	Flavonoid	-	2	-	2109000	3548300	2852800	1433300	3386500	1818700	1290400	2350300	667240	--	--
pmp000003	UPLC-MS/MS	Positive	317.07	302.04	316.058	C16H12O7	[M+H]+	-	-	Nepetin (5,7,3',4'-Tetrahydroxy-6-methoxyflavone)	Flavonoids	Flavonoid	520-11-6	2	-	31622	23442	23268	60267	40160	46702	10178	7930.7	9841.8	--	--
mws2627	UPLC-MS/MS	Positive	317.07	285.04	316.058	C16H12O7	[M+H]+	-	-	Tamarixetin (3,3',5,7-Tetrahydroxy-4'-Methoxyflavone)	Flavonoids	Flavonoid	603-61-2	3	-	32255	26949	27412	19493	15791	12615	45324	63383	39417	C10188	--
mws0066	UPLC-MS/MS	Negative	315.05	151	316.058	C16H12O7	[M-H]-	-	-	Isorhamnetin	Flavonoids	Flavonols	480-19-3	1	-	69922	69232	67109	49332	37190	37268	102730	133910	102900	C10084	--
Lmdp003808	UPLC-MS/MS	Positive	317.07	302.04	316.058	C16H12O7	[M+H]+	-	-	Azaleatin (5-O-Methylquercetin)	Flavonoids	Flavonols	529-51-1	1	-	63683	84579	78596	11242	19658	32690	197440	257470	134200	C10022	--
pmn001367	UPLC-MS/MS	Negative	315.07	153.02	316.079	C13H16O9	[M-H]-	-	-	Protocatechuic acid-4-O-glucoside*	Phenolic acids	Phenolic acids	-	1	-	1209400	1460200	1231700	1753100	1514900	1682200	2261400	2709000	1998900	--	--
pmb2871	UPLC-MS/MS	Negative	315.07	153	316.079	C13H16O9	[M-H]-	-	-	1-O-Gentisoyl-D-glucoside*	Phenolic acids	Phenolic acids	23445-11-6	1	-	1361500	1289500	1201700	1704700	1383600	1836800	2440700	2855700	2192200	--	--
Zmtn001661	UPLC-MS/MS	Negative	315.11	153.02	316.116	C14H20O8	[M-H]-	-	-	Vanilloloside	Others	Others	74950-96-2	2	-	1474900	1664300	1420800	1897700	1972900	2255500	2466800	3429100	2847400	--	--
Jmwn002172	UPLC-MS/MS	Negative	315.11	135.04	316.116	C14H20O8	[M-H]-	-	-	3,4-dihydroxyphenylethanol-β-D-glucopyranoside	Phenolic acids	Phenolic acids	-	1	-	1346000	1338400	1094900	1491400	1309600	1238300	1732900	1446300	1697600	--	--
Hmtn001120	UPLC-MS/MS	Negative	315.11	153.06	316.116	C14H20O8	[M-H]-	-	-	5-(2-Hydroxyethyl)-2-O-glucosylphenol	Phenolic acids	Phenolic acids	-	1	-	2709500	2917700	2929500	3559900	2948900	3436800	3999400	4041100	3804000	--	--
Smln010906	UPLC-MS/MS	Negative	315.19	315.19	316.204	C20H28O3	[M-H]-	-	-	catechol	Terpenoids	Ditepenoids	-	2	-	236350	246470	244090	272050	259250	278180	235430	245500	234670	--	--
pme3459	UPLC-MS/MS	Positive	317.21	299	316.204	C20H28O3	[M+H]+	-	-	Cafestol	Terpenoids	Ditepenoids	469-83-0	2	-	48280	44543	42058	63743	42093	51111	47986	63561	45355	C09066	--
pmp000970	UPLC-MS/MS	Positive	319.23	301.2	318.219	C20H30O3	[M+H]+	-	-	Hispanolone	Terpenoids	Ditepenoids	18676-07-8	3	-	17847	26110	21330	23295	21813	26530	25174	30509	30043	--	--
pmb0751	UPLC-MS/MS	Positive	321.1	147.3	320.09	C16H16O7	[M+H]+	-	-	Trans-5-O-(p-Coumaroyl)shikimate	Phenolic acids	Phenolic acids	-	3	-	16582	17203	13376	7761	7442.5	12344	11634	19394	20968	C02947	ko00940,ko00941,ko00945,ko01100,ko01110
mws0582	UPLC-MS/MS	Positive	322.11	130	321.099	C11H19N3O6S	[M+H]+	-	-	S-(Methyl)glutathione	Amino acids and derivatives	Amino acids and derivatives	2922-56-7	3	-	78897	80112	49916	125420	101290	99261	56790	55866	49982	C11347	--
pme3174	UPLC-MS/MS	Positive	324.06	112	323.052	C9H14N3O8P	[M+H]+	-	-	Cytidine 5'-monophosphate(Cytidylic acid)	Nucleotides and derivatives	Nucleotides and derivatives	63-37-6	2	-	17542	15425	22452	23680	15038	18369	12694	10448	9136.3	C00055	ko00240,ko01100
pme3188	UPLC-MS/MS	Negative	323.03	211	324.036	C9H13N2O9P	[M-H]-	-	-	Uridine 5'-monophosphate	Nucleotides and derivatives	Nucleotides and derivatives	58-97-9	2	-	71747	93947	72933	127790	125310	163250	84209	60649	57325	C00105	ko00240,ko01100
mws0983	UPLC-MS/MS	Positive	326.31	62.06	325.298	C20H39NO2	[M+H]+	-	-	N-Oleoylethanolamine	Alkaloids	Alkaloids	111-58-0	2	-	9184.1	13747	13894	7725.2	10478	8307.1	13331	9432.7	19056	C20792	--
Zmzn001549	UPLC-MS/MS	Negative	325.09	119.05	326.1	C15H18O8	[M-H]-	-	-	Ferulic acid-1-O-glucoside	Others	Others	14364-05-7	1	-	1518800	1516800	1462500	2727800	2443400	2854000	564170	520720	505310	C04415	--
Zmhn002301	UPLC-MS/MS	Negative	325.09	163.04	326.1	C15H18O8	[M-H]-	-	-	p-Coumaric acid-4-O-glucoside	Phenolic acids	Phenolic acids	117405-48-8	1	-	727780	678270	741880	1218700	1291200	1161700	382430	336170	356160	C06739	--
pmn001419	UPLC-MS/MS	Negative	325.09	163.04	326.1	C15H18O8	[M-H]-	-	-	1-O-[(E)-p-Cumaroyl]-D-glucose	Phenolic acids	Phenolic acids	-	1	-	2420600	2490700	2483100	4424600	3935500	4342400	1028300	1097100	1146200	--	--
Lmsn003111	UPLC-MS/MS	Negative	325.09	145.03	326.1	C15H18O8	[M-H]-	-	-	1-O-p-Coumaroyl-β-D-glucose	Phenolic acids	Phenolic acids	7139-64-2	1	-	13416000	12886000	13761000	21016000	21229000	21791000	7462900	6757000	6168300	C16827	--
Lmsn000363	UPLC-MS/MS	Negative	325.13	145.07	326.137	C16H22O7	[M-H]-	-	-	Raspberryketone glucoside	Phenolic acids	Phenolic acids	38963-94-9	3	-	205450	233580	192850	118680	147890	109880	125160	99094	100430	--	--
Smcp000882	UPLC-MS/MS	Positive	328.13	310.12	327.132	C15H21NO7	[M+H]+	-	-	N-benzoyl-2-aminoethyl-β-D-glucopyranoside	Others	Others	-	2	-	52517	31577	40362	78055	75529	76607	44709	48644	32370	--	--
Lmtn002233	UPLC-MS/MS	Negative	327.11	165.05	328.116	C15H20O8	[M-H]-	-	-	Androsin	Others	Others	531-28-2	2	-	83362	84843	88557	117300	138900	102960	18418	36076	42206	--	--
Hmsn002272	UPLC-MS/MS	Negative	327.11	165.05	328.116	C15H20O8	[M-H]-	-	-	Demethyl coniferin	Phenolic acids	Phenolic acids	-	1	-	17367	37162	40112	29917	38072	40022	18418	24255	39639	--	--
pmn001690	UPLC-MS/MS	Negative	327.14	165.09	328.152	C16H24O7	[M-H]-	-	-	3-Hydroxy-4-isopropylbenzylalcohol-3-O-glucoside	Phenolic acids	Phenolic acids	-	2	-	25886	23306	23968	28762	25463	23339	29750	39915	24541	--	--
pmn001691	UPLC-MS/MS	Negative	327.22	291.2	328.225	C18H32O5	[M-H]-	-	-	9,12,13-Trihydroxy-10,15-octadecadienoic acid	Lipids	Free fatty acids	-	2	-	4675.5	4302.5	2209.1	4354.2	5121.5	2421.4	2161.2	2677.4	2577.2	--	--
mws0371	UPLC-MS/MS	Negative	327.23	283.3	328.24	C22H32O2	[M-H]-	-	-	Cis-4,7,10,13,16,19-Docosahexaenoic Acid	Lipids	Free fatty acids	6217-54-5	3	-	4297.8	4943.6	4278.1	3228.5	3348.1	3784.2	3378.9	1220	2206.7	C06429	ko01040
mws0884	UPLC-MS/MS	Negative	328.05	134.2	329.053	C10H12N5O6P	[M-H]-	-	-	Cyclic 3',5'-Adenylic acid	Nucleotides and derivatives	Nucleotides and derivatives	60-92-4	1	-	277220	289830	268840	447410	367990	440580	449400	408070	391870	C00575	ko00230,ko01100
Lmzp004885	UPLC-MS/MS	Positive	331.08	315.05	330.074	C17H14O7	[M+H]+	-	-	Tricin (5,7,4'-Trihydroxy-3',5'-dimethoxyflavone)	Flavonoids	Flavonoid	520-32-1	3	-	43937	42218	43745	27121	24393	24666	81089	84161	72231	C10193	--
Zmhn001883	UPLC-MS/MS	Negative	329.09	209.04	330.095	C14H18O9	[M-H]-	-	-	Vanillic acid-4-O-glucoside	Phenolic acids	Phenolic acids	32142-31-7	2	-	215090	181400	170100	230190	202320	203650	236670	240250	194470	--	--
Smhn102346	UPLC-MS/MS	Negative	329.08	167.03	330.095	C14H18O9	[M-H]-	-	-	2,4,6-trihydroxy-acetophenone-4-O-b-D-glucopyranoside	Phenolic acids	Phenolic acids	-	1	-	1626100	1930300	1814500	2365800	2120300	2362500	2077600	2457400	2248400	--	--
Smhn002346	UPLC-MS/MS	Negative	329.08	167.03	330.095	C14H18O9	[M-H]-	-	-	2,4,6-trihydroxy-acetophenone-6-O-b-D-glucopyranoside	Phenolic acids	Phenolic acids	-	1	-	1927600	2146700	2050600	2749800	2493600	2828100	2672100	2465300	2832300	--	--
Lmtn002565	UPLC-MS/MS	Negative	329.11	167.03	330.095	C14H18O9	[M-H]-	-	-	1-O-Vanilloyl-D-Glucose	Phenolic acids	Phenolic acids	-	1	-	116130	91449	86392	9	9	9	260020	193340	196190	C20470	--
Lmmn003663	UPLC-MS/MS	Negative	329.09	167.04	330.095	C14H18O9	[M-H]-	-	-	5-Glucosyloxy-2-Hydroxybenzoic acid methyl ester	Phenolic acids	Phenolic acids	-	1	-	49840	89843	69269	9	9	9	234500	251390	166350	--	--
Lmgp002452	UPLC-MS/MS	Positive	331.1	132.04	330.095	C14H18O9	[M+H]+	-	-	2-Glucosyloxy-(4-hydroxyphenyl)acetic acid (Dhurrin acid)	Flavonoids	Flavonoid	-	2	-	15675	8623.8	17806	26650	18434	24299	9	17264	15563	--	--
pmn001517	UPLC-MS/MS	Negative	329.12	167	330.131	C15H22O8	[M-H]-	-	-	3,4,5-Trimethoxyphenyl-1-O-Glucoside	Phenolic acids	Phenolic acids	-	2	-	4862100	4647600	4512900	7678400	6430900	6560500	6329400	6362300	6915900	--	--
Hmqn003054	UPLC-MS/MS	Negative	329.23	311.23	330.24	C18H34O5	[M-H]-	-	-	9,10,11-Trihydroxy-12-octadecenoic acid	Lipids	Free fatty acids	61911-67-9	2	-	6949.6	7708.3	8402.5	11222	7296.7	8468.8	7149.9	9918.9	6447.8	--	--
pmn001694	UPLC-MS/MS	Negative	329.23	229.15	330.241	C18H34O5	[M-H]-	-	-	9,10,13-Trihydroxy-11-Octadecenoic Acid	Lipids	Free fatty acids	29907-57-1	1	-	60015	66657	60804	92589	71572	78820	82696	75138	70902	C14835	ko00591
Lmbn003970	UPLC-MS/MS	Negative	329.23	211.14	330.241	C18H34O5	[M-H]-	-	-	9,12,13-TriHOME; 9(S),12(S),13(S)-Trihydroxy-10(E)-octadecenoic acid	Lipids	Free fatty acids	97134-11-7	2	-	3738	2957.3	2595.3	3827.3	4167.8	4919.3	2762.2	4095.3	2784.5	C14833	ko00591
pmp001284	UPLC-MS/MS	Positive	331.28	313.27	330.277	C19H38O4	[M+H]+	-	-	Monopalmitin	Lipids	Glycerol ester	542-44-9	1	-	228400	305200	318880	88505	160220	76354	33559	26305	106550	--	--
pme3184	UPLC-MS/MS	Positive	332.08	136	331.068	C10H14N5O6P	[M+H]+	-	-	2'-Deoxyadenosine-5'-monophosphate	Nucleotides and derivatives	Nucleotides and derivatives	653-63-4	1	-	298320	318940	302770	410450	459240	458620	359770	348570	367610	C00360	ko00230,ko01100
pmb0789	UPLC-MS/MS	Positive	332.13	152.07	331.127	C14H21NO8	[M+H]+	-	-	Pyridoxine-5'-O-glucoside	Others	Vitamin	-	3	-	2526000	2531500	2624800	4003400	3360700	3789200	3913000	4163700	3392900	C03996	--
pmc0066	UPLC-MS/MS	Positive	333.05	137.05	332.052	C10H13N4O7P	[M+H]+	-	-	2'-Deoxyinosine-5'-monophosphate	Nucleotides and derivatives	Nucleotides and derivatives	3393-18-8	2	-	360820	243070	317440	177430	182220	149260	98834	86012	138250	C06196	ko00230
pmb2928	UPLC-MS/MS	Negative	331	313.1	332.074	C13H16O10	[M-H]-	-	-	Gallic acid-4-O-glucoside	Tannins	Tannin	84274-52-2	3	-	162310	170500	165330	202870	163170	210980	331250	319540	271730	--	--
MWS20201	UPLC-MS/MS	Positive	333.08	171.03	332.074	C13H16O10	[M+H]+	-	-	1-O-galloyl-β-D-glucose	Phenolic acids	Phenolic acids	13405-60-2	2	-	184330	152290	196980	179130	118140	139600	242280	296040	256960	C01158	--
Lmfn000604	UPLC-MS/MS	Negative	331.07	169.01	332.074	C13H16O10	[M-H]-	-	-	6-O-Galloyl-D-glucose	Tannins	Tannin	13186-19-1	2	-	414600	286440	414930	320960	221100	347710	1088500	1285100	845890	--	--
Hmln000873	UPLC-MS/MS	Negative	331.07	169.01	332.075	C13H16O10	[M-H]-	-	-	2-O-Galloyl-D-glucose	Tannins	Tannin	-	2	-	1062800	1138300	1163500	1594000	1289700	1439900	1541200	1675300	1719700	--	--
Hmln000659	UPLC-MS/MS	Negative	331.07	169.01	332.075	C13H16O10	[M-H]-	-	-	3-O-Galloyl-D-glucose	Tannins	Tannin	-	3	-	398990	297620	507880	393650	246800	361360	1172300	1286700	1153900	--	--
Lmmn001294	UPLC-MS/MS	Negative	331.1	153.02	332.111	C14H20O9	[M-H]-	-	-	Koaburaside	Phenolic acids	Phenolic acids	41653-73-0	1	-	5081700	6125200	5575500	5093400	4484300	4650500	6469500	7389900	7886700	--	--
Jmwn002117	UPLC-MS/MS	Negative	331.1	153.02	332.111	C14H20O9	[M-H]-	-	-	2-(3,4-dihydroxyphenyl)ethanediol 1-O-β-D-glucopyranoside	Phenolic acids	Phenolic acids	-	1	-	5242300	6252600	5948100	5369900	4623800	5149900	7046600	7105500	7741400	--	--
mws0675	UPLC-MS/MS	Positive	335.06	123	334.057	C11H15N2O8P	[M+H]+	-	-	β-Nicotinamide mononucleotide	Nucleotides and derivatives	Nucleotides and derivatives	1094-61-7	3	-	24432	25249	26833	9	9	9	14318	17456	28234	C00455	ko00760,ko01100
Lmqn000432	UPLC-MS/MS	Negative	333.06	333.06	334.067	C9H19O11P	[M-H]-	-	-	1-(sn-Glycero-3-phospho)-1D-myo-inositol	Others	Saccharides and Alcohols	-	2	-	232450	236110	313050	146980	249870	165270	175400	245270	226810	--	--
Hmln002806	UPLC-MS/MS	Negative	335.08	179.03	336.085	C16H16O8	[M-H]-	-	-	5-O-Caffeoylshikimic acid	Phenolic acids	Phenolic acids	180981-12-8	3	-	25344	28788	37144	51290	46194	66913	28923	32674	20337	C10434	ko00940,ko00941,ko00945,ko01100,ko01110
pmn001421	UPLC-MS/MS	Negative	337.09	191.05	338.1	C16H18O8	[M-H]-	-	-	3-O-p-Coumaroylquinic acid*	Phenolic acids	Phenolic acids	87099-71-6	1	-	37346	40574	39668	189260	13625	23455	71407	29083	47262	--	--
pmb3074	UPLC-MS/MS	Negative	337.09	191.05	338.1	C16H18O8	[M-H]-	-	-	5-O-p-Coumaroylquinic acid*	Phenolic acids	Phenolic acids	1899-30-5	2	-	40373	33550	22165	53772	44235	45815	19854	25058	12510	C12208	ko00940,ko00941,ko00945,ko01110
pmb3068	UPLC-MS/MS	Negative	337.09	173.1	338.1	C16H18O8	[M-H]-	-	-	1-O-p-Coumaroylquinic acid	Phenolic acids	Phenolic acids	-	2	-	5113.1	7483.9	3692.8	19543	3021.5	10813	9	9	9	--	--
Cmhp005227	UPLC-MS/MS	Positive	339.11	177.05	338.1	C16H18O8	[M+H]+	-	-	4,8-Dihydroxy Naphthol-1-O-glucoside	Quinones	Quinones	-	1	-	587930	358930	402130	603060	582530	595070	404350	215610	365930	--	--
Zmyn000083	UPLC-MS/MS	Negative	338.99	78.96	339.996	C6H14O12P2	[M-H]-	-	-	D-Glucose 1,6-bisphosphate	Others	Saccharides and Alcohols	10139-18-1	1	-	11275	14836	12735	26040	23798	27773	12273	15296	13260	C01231	ko00500,ko01100
pme3311	UPLC-MS/MS	Negative	339	97	339.996	C6H14O12P2	[M-H]-	-	-	D-Fructose-1,6-biphosphate	Others	Saccharides and Alcohols	488-69-7	2	-	86447	52231	66730	44365	42139	35048	32209	33149	47617	C00354	ko00400,ko00710,ko01100,ko01110,ko01200
pma0149	UPLC-MS/MS	Positive	341.08	207.07	340.079	C15H16O9	[M+H]+	-	-	Sinapoyl malate	Phenolic acids	Phenolic acids	92344-58-6	2	-	13571	16528	17218	19630	25904	19022	16440	19589	15090	C02887	ko00940
mws1015	UPLC-MS/MS	Negative	339.07	177	340.079	C15H16O9	[M-H]-	-	-	Esculin (6,7-DihydroxyCoumarin-6-glucoside)	Lignans and Coumarins	Coumarins	531-75-9	2	-	193560	198530	210240	149970	153300	190230	251400	259610	298840	C09264	--
Lmbn001162	UPLC-MS/MS	Negative	339.07	177.02	340.079	C15H16O9	[M-H]-	-	-	Esculetin-7-O-glucoside	Lignans and Coumarins	Coumarins	-	3	-	208190	216270	237090	190480	171830	183970	293780	251550	253590	--	--
Cmyn001328	UPLC-MS/MS	Negative	339.07	177.02	340.079	C15H16O9	[M-H]-	-	-	Daphnin	Lignans and Coumarins	Coumarins	486-55-5	2	-	234900	227170	210490	208520	173630	163850	263530	292190	235740	C01421	--
pmf0400	UPLC-MS/MS	Negative	339.33	183.2	340.334	C22H44O2	[M-H]-	-	-	Docosanoic acid (Behenic acid)	Lipids	Free fatty acids	112-85-6	2	-	15054	9074.1	12519	6184.5	15730	3867.8	3304.1	6347.6	8801.6	C08281	ko00073,ko01040
pmn001420	UPLC-MS/MS	Negative	341.09	179.04	342.095	C15H18O9	[M-H]-	-	-	1-O-[(E)-Caffeoyl]-D-glucose	Phenolic acids	Phenolic acids	-	1	-	1473400	1763400	1362400	2753100	2368200	2733100	665780	855730	819550	--	--
Lmsn002548	UPLC-MS/MS	Negative	341.09	161.02	342.095	C15H18O9	[M-H]-	-	-	1-O-Caffeoyl-β-D-glucose	Phenolic acids	Phenolic acids	14364-08-0	1	-	10515000	10468000	10261000	17339000	16576000	13644000	7943600	7542500	7234700	C10433	--
Jmwn002620	UPLC-MS/MS	Negative	341.09	161.02	342.095	C15H18O9	[M-H]-	-	-	Vanillic Acid-4-O-Glucuronide	Phenolic acids	Phenolic acids	-	1	-	10322000	10249000	9625800	17158000	15171000	13643000	5897000	6949000	7190100	--	--
Zmhn001793	UPLC-MS/MS	Negative	341.09	179.03	342.096	C15H18O9	[M-H]-	-	-	6-O-Caffeoyl-D-glucose	Phenolic acids	Phenolic acids	-	2	-	1052400	1364000	1317200	2894000	2118600	2520300	582540	537670	493360	--	--
MWSHY0128	UPLC-MS/MS	Positive	343.12	313.08	342.11	C19H18O6	[M+H]+	-	-	5,7,8,4'-Tetramethoxyflavone	Flavonoids	Flavonoid	6601-66-7	3	-	7121.6	5357.4	6327.2	6817.6	7910.1	7391	9197.6	6076.2	6122.3	--	--
Lmcp007240	UPLC-MS/MS	Positive	343.12	313.08	342.11	C19H18O6	[M+H]+	-	-	5,6,7,4'-Tetramethoxyflavone	Flavonoids	Flavonoid	1168-42-9	3	-	5059.5	7021.7	4731.5	5948.9	5192	5431.9	7411.1	4578.1	5223.1	C14472	--
Zmjn000425	UPLC-MS/MS	Negative	341.11	89.02	342.116	C12H22O11	[M-H]-	-	-	D-Lactulose	Others	Saccharides and Alcohols	4618-18-2	1	-	1716900	1256600	1555100	1113100	1624500	1122700	732460	511480	1070600	C07064	--
pme0519	UPLC-MS/MS	Negative	341.11	119.03	342.116	C12H22O11	[M-H]-	-	-	D-Sucrose*	Others	Saccharides and Alcohols	57-50-1	1	-	4280800	4320000	4733600	4182900	3870400	3740200	3636800	4717000	3792900	C00089	ko00052,ko00500,ko01100,ko01110,ko02010
mws5038	UPLC-MS/MS	Negative	341.11	89.02	342.116	C12H22O11	[M-H]-	-	-	Isomaltulose*	Others	Saccharides and Alcohols	13718-94-0	1	-	3631700	2165700	3757100	5415500	4019300	2679500	3774300	3414500	3373900	C01742	--
mws1333	UPLC-MS/MS	Negative	341.11	113	342.116	C12H22O11	[M-H]-	-	-	Melibiose	Others	Saccharides and Alcohols	585-99-9	1	-	1456800	1306100	1573300	1763800	1653900	1490200	1422900	1852000	1360100	C05402	ko00052,ko01100,ko02010
mws1080	UPLC-MS/MS	Negative	341.11	179	342.116	C12H22O11	[M-H]-	-	-	Galactinol	Others	Saccharides and Alcohols	3687-64-7	1	-	8144300	8270100	5804800	6984600	8504500	7340800	6701400	9085600	7024300	C01235	ko00052,ko01100
mws0264	UPLC-MS/MS	Negative	341.11	119	342.116	C12H22O11	[M-H]-	-	-	D-Trehalose*	Others	Saccharides and Alcohols	99-20-7	1	-	3087600	2892400	2713300	3356600	2812300	2469500	2809700	4147800	3137200	C01083	ko00500,ko01100,ko01110,ko02010
MA10039641	UPLC-MS/MS	Negative	341.11	89.02	342.116	C12H22O11	[M-H]-	-	-	Lactobiose	Others	Saccharides and Alcohols	63-42-3	1	-	640540	349390	746410	404870	298780	457600	279620	194450	390000	C00243	ko00052,ko01100,ko02010
Lmsn000381	UPLC-MS/MS	Negative	341.11	89.02	342.116	C12H22O11	[M-H]-	-	-	D-Maltose*	Others	Saccharides and Alcohols	133-99-3	1	-	4589200	2903700	6467400	4349400	3588200	3736100	2128100	3902400	3958900	C01971	--
mws0906	UPLC-MS/MS	Negative	341.12	179	342.131	C16H22O8	[M-H]-	-	-	Coniferin	Phenolic acids	Phenolic acids	531-29-3	2	-	3451900	3200200	3659200	5067600	4699200	5314000	2094900	2046700	2395900	C00761	ko00940
pmb2211	UPLC-MS/MS	Positive	343.3	240.7	342.288	C19H38N2O3	[M+H]+	-	-	Cocamidopropyl betaine	Alkaloids	Alkaloids	4292-10-8	3	-	58036	59806	64459	148410	96294	138470	125180	213600	128640	--	--
Hmjp006104	UPLC-MS/MS	Positive	344.15	177.05	343.142	C19H21NO5	[M+H]+	-	-	N-Cis-Feruloyl-3'-O-methyldopamine	Alkaloids	Alkaloids	-	1	-	365980	354730	375360	124560	101640	98329	1188900	681550	527950	--	--
Hmjp005906	UPLC-MS/MS	Positive	344.15	177.05	343.142	C19H21NO5	[M+H]+	-	-	N-Trans-Feruloyl-3'-O-methyldopamine	Alkaloids	Alkaloids	-	1	-	97351	98493	104760	62500	26242	51847	259760	212320	157580	--	--
Lmjn005592	UPLC-MS/MS	Negative	343.08	313.04	344.09	C18H16O7	[M-H]-	-	-	Cirsilineol (4',5-Dihydroxy-3',6,7-trimethoxyflavone)	Flavonoids	Flavonoid	41365-32-6	3	-	8324.8	8301.1	8231.6	13790	12967	13461	8963.4	9641.1	9515	C10032	--
mws0609	UPLC-MS/MS	Negative	344.04	150	345.047	C10H12N5O7P	[M-H]-	-	-	Guanosine 3',5'-cyclic monophosphate	Nucleotides and derivatives	Nucleotides and derivatives	7665-99-8	1	-	309450	308290	306510	426840	387870	424420	515480	605890	476470	C00942	ko00230,ko01100
pmb0801	UPLC-MS/MS	Positive	346.11	184.1	345.106	C14H19NO9	[M+H]+	-	-	4-Pyridoxic acid-O-glucoside	Others	Vitamin	-	3	-	419500	403810	427700	515610	398530	459710	726280	815620	727610	--	--
mws1002	UPLC-MS/MS	Negative	345.06	330	346.069	C17H14O8	[M-H]-	-	-	Syringetin	Flavonoids	Flavonoid	4423-37-4	2	-	11470	11960	12138	2321.8	1834.6	2039.2	25783	27392	23636	C11620	ko00944
Lmtn000940	UPLC-MS/MS	Negative	345.08	139.04	346.09	C14H18O10	[M-H]-	-	-	1-O-(3,4-Dihydroxy-5-methoxy-benzoyl)-glucoside	Phenolic acids	Phenolic acids	-	2	-	559210	578370	533880	354350	304180	347160	1565200	1718300	1332600	--	--
mws1629	UPLC-MS/MS	Negative	345.12	183.2	346.126	C15H22O9	[M-H]-	-	-	Aucubin	Terpenoids	Sesquiterpenoids	479-98-1	1	-	33031	25924	31611	60243	52627	64112	18344	16042	15945	C09771	--
pmb0981	UPLC-MS/MS	Positive	348.07	136	347.063	C10H14N5O7P	[M+H]+	-	-	Adenosine 5'-monophosphate	Nucleotides and derivatives	Nucleotides and derivatives	61-19-8	3	-	1672900	1812000	1958200	2470200	1907500	2230200	2925200	3203300	3077800	C00020	ko00230,ko00908,ko01100,ko01110
pmb0532	UPLC-MS/MS	Positive	349.05	137.3	348.047	C10H13N4O8P	[M+H]+	-	-	Inosine 5'-monophosphate	Nucleotides and derivatives	Nucleotides and derivatives	131-99-7	3	-	126600	119380	127540	187800	149170	188420	204210	244250	233400	C00130	ko00230,ko01100,ko01110
pma0633	UPLC-MS/MS	Positive	349.26	204.3	348.253	C19H32N4O2	[M+H]+	-	-	N-p-Coumaroylspermine	Alkaloids	Phenolamine	130210-35-4	2	-	35147	24682	32383	9	9	9	60372	75779	52446	--	--
pmb1562	UPLC-MS/MS	Positive	351.25	146.9	350.246	C21H34O4	[M+H]+	-	-	1-Stearidonoyl-Glycerol	Lipids	Glycerol ester	-	2	-	85217	81910	83412	64359	55661	61921	144050	143100	125080	--	--
Lmhp011562	UPLC-MS/MS	Positive	353.27	261.22	352.261	C21H36O4	[M+H]+	-	-	1-α-Linolenoyl-glycerol	Lipids	Glycerol ester	-	1	-	15321000	16901000	17600000	18755000	18328000	16994000	16703000	14442000	17404000	--	--
Lmhp011388	UPLC-MS/MS	Positive	353.27	261.22	352.261	C21H36O4	[M+H]+	-	-	2-α-Linolenoyl-glycerol	Lipids	Glycerol ester	55268-58-1	1	-	14232000	16608000	17275000	18144000	18011000	17569000	16118000	14214000	18163000	--	--
pme1816	UPLC-MS/MS	Negative	353.09	191	354.095	C16H18O9	[M-H]-	-	-	Neochlorogenic acid (5-O-Caffeoylquinic acid)	Phenolic acids	Phenolic acids	906-33-2	1	-	87180	93235	95866	326140	214760	255850	9	9	9	C17147	--
mws2108	UPLC-MS/MS	Negative	353.09	191.05	354.095	C16H18O9	[M-H]-	-	-	Cryptochlorogenic acid (4-O-Caffeoylquinic acid)	Phenolic acids	Phenolic acids	905-99-7	2	-	439710	486060	367710	948120	300160	214760	472600	170800	248300	--	--
mws1077	UPLC-MS/MS	Positive	355.1	193.05	354.095	C16H18O9	[M+H]+	-	-	Scopoletin-7-O-glucoside (Scopolin)	Lignans and Coumarins	Coumarins	531-44-2	2	-	107840	115100	84203	233990	66727	65050	135600	96284	76594	C01527	ko00940,ko01110
Lmhp112042	UPLC-MS/MS	Positive	355.28	263.24	354.277	C21H38O4	[M+H]+	-	-	1-Linoleoylglycerol	Lipids	Glycerol ester	2277-28-3	1	-	1667300	1789600	1801400	1540100	1471900	1462800	1873400	1393600	2007200	--	--
Lmhp012042	UPLC-MS/MS	Positive	355.28	263.24	354.277	C21H38O4	[M+H]+	-	-	2-Linoleoylglycerol	Lipids	Glycerol ester	3443-82-1	1	-	1681500	1721200	1890000	1457800	1492500	1507500	1900200	1392000	2072900	--	--
Zmhn002334	UPLC-MS/MS	Negative	355.1	193.05	356.111	C16H20O9	[M-H]-	-	-	6-O-Feruloyl-D-glucose	Phenolic acids	Phenolic acids	137887-25-3	2	-	1183500	1260200	1118100	1736400	1922000	1583900	520380	441030	560750	--	--
Lmsn003318	UPLC-MS/MS	Negative	355.1	175.04	356.111	C16H20O9	[M-H]-	-	-	1-O-Feruloyl-β-D-glucose	Phenolic acids	Phenolic acids	7196-71-6	1	-	28823000	27546000	27956000	39656000	38900000	38176000	16203000	13708000	15682000	C17759	--
Hmmn002544	UPLC-MS/MS	Negative	355.1	193.05	356.111	C16H20O9	[M-H]-	-	-	Ferulic acid-4-O-glucoside	Phenolic acids	Phenolic acids	117405-51-3	2	-	502650	557180	591440	184320	141700	205570	938400	1132200	900010	--	--
Hmhn003518	UPLC-MS/MS	Negative	355.1	175.04	356.111	C16H20O9	[M-H]-	-	-	4-O-β-D-glucopyranosylferulic acid	Phenolic acids	Phenolic acids	-	1	-	11692000	14170000	12008000	19715000	18589000	20122000	6397200	6160800	5958500	--	--
pmb0296	UPLC-MS/MS	Positive	357.3	265.4	356.293	C21H40O4	[M+H]+	-	-	1-Oleoyl-Sn-Glycerol	Lipids	Glycerol ester	129784-87-8	3	-	12998	17407	21473	19264	19116	15300	4246.1	3308.1	13440	--	--
mws1526	UPLC-MS/MS	Positive	359.13	197	358.126	C16H22O9	[M+H]+	-	-	Sweroside	Terpenoids	Sesquiterpenoids	14215-86-2	2	-	5019700	5660700	5248800	5366900	4725900	4284400	7889900	8415200	6976200	C17071	--
mws0097	UPLC-MS/MS	Negative	357.13	151	358.142	C20H22O6	[M-H]-	-	-	Pinoresinol*	Lignans and Coumarins	Lignans	487-36-5	3	-	7028	7518	4569.6	9	9	9	10971	9093.3	14200	C05366	ko00998,ko01100,ko01110
Lmdn004267	UPLC-MS/MS	Negative	357.13	151.04	358.142	C20H22O6	[M-H]-	-	-	Epipinoresinol*	Lignans and Coumarins	Lignans	24404-50-0	3	-	6079.7	6692.6	4988.9	9	9	9	17077	12952	12779	--	--
pmb3107	UPLC-MS/MS	Negative	359.1	182.1	360.106	C15H20O10	[M-H]-	-	-	Glucosyringic Acid	Phenolic acids	Phenolic acids	-	3	-	1111400	1195800	1151800	1497300	1227900	1393100	1644900	1726800	1637700	--	--
pmn001496	UPLC-MS/MS	Negative	359.2	285.2	360.23	C22H34NO3+	[M-H]-	-	-	N-Isopentenyl-dendroxine	Alkaloids	Sesquiterpene alkaloids	-	3	-	3229.7	3831.9	3023.7	3036.6	2357.1	2628.6	4725.4	3998.1	4769.3	--	--
pmb0998	UPLC-MS/MS	Positive	364.07	152.1	363.058	C10H14N5O8P	[M+H]+	-	-	Guanosine 5'-monophosphate	Nucleotides and derivatives	Nucleotides and derivatives	85-32-5	3	-	18005	19801	19525	19947	17146	24027	17349	24824	22852	C00144	ko00230,ko01100
mws5040	UPLC-MS/MS	Positive	365.11	203.05	364.078	C12H21O11Na	[M+H]+	-	-	Turanose	Others	Saccharides and Alcohols	547-25-1	2	-	21054000	17875000	23184000	24628000	22058000	20928000	22373000	24028000	24295000	C19636	--
pmb0964	UPLC-MS/MS	Positive	366.2	204.1	365.17	C16H23N5O5	[M+H]+	-	-	Isopentenyladenine-7-N-glucoside	Nucleotides and derivatives	Nucleotides and derivatives	-	3	-	1195200	1379600	1685400	1699400	1333000	1506200	1150700	1374200	1842500	--	--
mws0179	UPLC-MS/MS	Negative	367.1	190.9	368.111	C17H20O9	[M-H]-	-	-	Chlorogenic acid methyl ester	Phenolic acids	Phenolic acids	29708-87-0	3	-	31695	48696	30959	70406	74725	72363	21903	23502	20801	--	--
Lmsn004901	UPLC-MS/MS	Negative	367.36	367.36	368.365	C24H48O2	[M-H]-	-	-	Tetracosanoic Acid (Lignoceric acid)	Lipids	Free fatty acids	557-59-5	2	-	10260	9996.7	8941.1	7218.3	11623	4767.2	9	9	9	C08320	ko01040
Lmbp002255	UPLC-MS/MS	Positive	371.1	209.05	370.09	C16H18O10	[M+H]+	-	-	Fraxetin-8-O-glucoside (Fraxin)	Lignans and Coumarins	Coumarins	524-30-1	2	-	97903	110320	137420	72638	90752	134830	130470	115440	128210	C09266	--
mws0055	UPLC-MS/MS	Positive	373.13	343.09	372.121	C20H20O7	[M+H]+	-	-	Tangeretin (4',5,6,7,8-Pentamethoxyflavone)	Flavonoids	Flavonols	481-53-8	3	-	527930	547120	539500	521030	535870	552780	505650	491590	547180	C10190	--
mws0011	UPLC-MS/MS	Negative	371.13	209	372.142	C17H24O9	[M-H]-	-	-	Syringin	Phenolic acids	Phenolic acids	118-34-3	2	-	181180	158600	125680	89363	112220	94709	240690	262610	287190	C01533	ko00940
pmb0108	UPLC-MS/MS	Positive	375.2	137.1	374.1	C19H18O8	[M+H]+	-	-	Feruloyl syringic acid	Phenolic acids	Phenolic acids	-	2	-	39470	40009	27941	35008	32214	36805	37760	56396	54434	--	--
Lmjp003722	UPLC-MS/MS	Positive	375.14	357.13	374.124	C20H22O7	[M+H]+	-	-	2'-Hydroxy-3,4,5,4',6'-pentamethoxychalcone	Flavonoids	Chalcones	-	3	-	28874	37858	31327	67787	51453	64035	25959	19998	23902	--	--
pmn001400	UPLC-MS/MS	Negative	375.11	243.1	376.116	C19H20O8	[M-H]-	-	-	2,3,5,4'-Tetrahydroxystilbene-2-O-D-xyloside	Others	Stilbene	-	3	-	38539	31420	40231	36266	29676	32051	72199	47373	64720	--	--
Lmzn001983	UPLC-MS/MS	Negative	375.13	135.05	376.137	C16H24O10	[M-H]-	-	-	D-Threo-guaiacylglycerol-7-O-β-D-glucoside	Phenolic acids	Phenolic acids	-	2	-	245120	249870	219410	349420	292900	305520	278930	279950	290620	--	--
mws0232	UPLC-MS/MS	Positive	377.15	243	376.138	C17H20N4O6	[M+H]+	-	-	Riboflavin (Vitamin B2)	Others	Vitamin	83-88-5	3	-	519630	463350	510600	605570	401370	463190	602210	559900	544430	C00255	ko00740,ko01100,ko01110,ko02010
pmp001132	UPLC-MS/MS	Positive	376.31	358.3	376.225	C22H34NO4+	[M]+	-	-	N-Isopentenyl-6-hydroxydendroxinium	Alkaloids	Alkaloids	-	1	-	78059	88073	81221	14676	14744	17749	135590	104870	139160	--	--
pme3337	UPLC-MS/MS	Positive	384.12	252	383.108	C14H17N5O8	[M+H]+	-	-	Succinyladenosine	Nucleotides and derivatives	Nucleotides and derivatives	4542-23-8	1	-	874750	837300	873160	1812100	1352300	1517000	952290	980080	772960	--	--
pme1286	UPLC-MS/MS	Positive	385.13	250	384.122	C14H20N6O5S	[M+H]+	-	-	S-(5'-Adenosy)-L-homocysteine	Amino acids and derivatives	Amino acids and derivatives	979-92-0	1	-	92485	84097	68147	128730	121130	128770	96544	90412	62384	C00021	ko00270,ko01100,ko01230
Zmhn002227	UPLC-MS/MS	Negative	385.11	223.06	386.121	C17H22O10	[M-H]-	-	-	4-O-Glucosyl-sinapate	Phenolic acids	Phenolic acids	-	2	-	7254000	7323300	7392300	5379100	5596300	5328700	10096000	10704000	9505300	C02919	--
pmb2940	UPLC-MS/MS	Negative	385.11	205	386.121	C17H22O10	[M-H]-	-	-	1-O-Glucosyl sinapate	Phenolic acids	Phenolic acids	78185-48-5	1	-	19650000	24909000	22331000	17235000	17465000	15113000	31019000	27293000	29336000	--	--
HJN003	UPLC-MS/MS	Negative	385.11	223.06	386.122	C17H22O10	[M-H]-	-	-	1-O-Sinapoyl-D-glucose	Phenolic acids	Phenolic acids	-	2	-	6835400	6908700	6999000	5604300	5326100	5616900	9884900	10085000	9531500	C01175	ko00940
pmb0292	UPLC-MS/MS	Positive	387.1	331.1	386.355	C27H46O	[M+H]+	-	-	Cholesterol	Steroids	Steroid	57-88-5	3	-	648240	576810	629900	1180300	1040700	1204100	1267900	697380	712340	C00187	ko00100,ko01100
pmp000113	UPLC-MS/MS	Positive	389.12	359.08	388.116	C20H20O8	[M+H]+	-	-	5-Hydroxy-6,7,8,3',4'-pentamethoxyflavone	Flavonoids	Flavonoid	2174-59-6	2	-	4723.4	6377.9	5056.1	8170.3	6760.9	3907.6	4843.9	4071.5	5509.5	--	--
mws1565	UPLC-MS/MS	Positive	389.14	209.08	388.137	C17H24O10	[M+H]+	-	-	Geniposide	Terpenoids	Monoterpenoids	24512-63-8	2	-	488080	679820	504390	849400	885880	763090	998950	830040	962620	C09781	--
Lmzn001582	UPLC-MS/MS	Negative	387.17	207.1	388.174	C18H28O9	[M-H]-	-	-	5'-Glucosyloxyjasmanic acid	Phenolic acids	Phenolic acids	-	3	-	72694	81197	112520	89589	72101	82148	130210	77413	86074	--	--
Lmwp011196	UPLC-MS/MS	Positive	391.28	149.02	390.277	C24H38O4	[M+H]+	-	-	Bis(2-ethylhexyl)phthalate	Phenolic acids	Phenolic acids	117-81-7	2	-	517980	477450	488020	2951600	918440	993770	3679000	533650	502080	C03690	--
Lmmp010562	UPLC-MS/MS	Positive	391.28	149.02	390.277	C24H38O4	[M+H]+	-	-	Diisooctyl Phthalate	Phenolic acids	Phenolic acids	27554-26-3	2	-	433950	454320	555980	2768700	914980	888050	3421600	397650	420090	C14577	--
pmb0489	UPLC-MS/MS	Positive	397.2	147.04	396.19	C19H28N2O7	[M+H]+	-	-	N-Glucosyl-p-coumaroylputrescine	Alkaloids	Phenolamine	-	3	-	33569	30804	35740	23507	17280	23330	83918	100350	76977	--	--
pme2735	UPLC-MS/MS	Positive	399.2	250	398.137	C15H22N6O5S	[M+H]+	-	-	S-Adenosyl-L-methionine	Amino acids and derivatives	Amino acids and derivatives	29908-03-0	2	-	406870	317780	422590	392110	353730	426610	444820	398080	347990	C00019	ko00261,ko00270,ko00330,ko00908,ko01100,ko01110,ko01230,ko04122
pmc0281	UPLC-MS/MS	Positive	400.15	136.11	399.139	C15H21N5O8	[M+H]+	-	-	Ribosyladenosine	Nucleotides and derivatives	Nucleotides and derivatives	-	2	-	1263800	1117700	1220100	1792400	1540900	1619000	1253600	1279400	1288200	--	--
pmb0681	UPLC-MS/MS	Positive	403.1	367.08	402.095	C20H18O9	[M+H]+	-	-	Apigenin-8-C-Arabinoside	Flavonoids	Flavonoid	-	3	-	231900	193540	195950	156850	136420	151670	435700	424360	348940	--	--
mws0043	UPLC-MS/MS	Positive	403.14	373.1	402.131	C21H22O8	[M+H]+	-	-	Nobiletin (5,6,7,8,3',4'-Hexamethoxyflavone)	Flavonoids	Flavonoid	478-01-3	3	-	431000	421240	442020	408330	414440	412850	398230	398090	434100	C10112	--
Hmln003529	UPLC-MS/MS	Negative	401.15	269.11	402.152	C18H26O10	[M-H]-	-	-	Benzyl β-primeveroside	Others	Others	130622-31-0	1	-	2031200	2492900	2581600	2794100	2334500	2259800	2797000	3038400	2899100	--	--
Cmjn004337	UPLC-MS/MS	Negative	401.14	269.1	402.153	C18H26O10	[M-H]-	-	-	Benzyl-(2''-O-xylosyl)glucoside	Phenolic acids	Phenolic acids	-	1	-	2228500	2828200	2484600	2150500	2331500	3205300	2789800	2978300	3105600	--	--
pme3007	UPLC-MS/MS	Negative	402.99	159	404.002	C9H14N2O12P2	[M-H]-	-	-	Uridine 5'-diphosphate	Nucleotides and derivatives	Nucleotides and derivatives	27821-45-0	2	-	26503	22134	25733	42721	27043	23172	27128	22624	33826	C00015	ko00240,ko00908,ko01100
pmp001054	UPLC-MS/MS	Positive	422.17	225.08	404.132	C17H24O11	[M+NH4]+	-	-	Gardenoside	Terpenoids	Monoterpenoids	24512-62-7	2	-	356810	325040	357860	339670	319850	361730	539780	511450	497050	C09779	--
Cmhn002057	UPLC-MS/MS	Negative	403.16	343.14	404.168	C18H28O10	[M-H]-	-	-	2,7-Dimethyl-2,4-diene-deca-α,x-diacid 8-O-β-glucoside	Tannins	Tannin	-	3	-	22212	13845	9977.8	13065	16882	11217	29739	33334	30852	--	--
Zmhn101746	UPLC-MS/MS	Negative	405.12	243.07	406.126	C20H22O9	[M-H]-	-	-	Tetrahydroxy-stilbene-O-glucoside	Others	Stilbene	-	3	-	65830	88607	83054	103580	122490	168940	64086	68741	48507	--	--
pmn001399	UPLC-MS/MS	Negative	405.12	243.1	406.126	C20H22O9	[M-H]-	-	-	2,4,6,4'-Tetrahydroxy-stilbene-2-O-glucoside	Others	Stilbene	-	3	-	56485	74044	71196	128520	102820	130380	48164	65167	32719	--	--
pma6625	UPLC-MS/MS	Negative	405.13	243.06	406.126	C20H22O9	[M-H]-	-	-	E-3,4,5'-Trihydroxy-3'-glucosylstilbene	Others	Stilbene	-	2	-	28663	21115	26604	50557	28280	47446	21493	28723	45052	--	--
Zmsn001980	UPLC-MS/MS	Negative	407.18	203.09	408.178	C21H28O8	[M-H]-	-	-	Ixerisoside D	Terpenoids	Sesquiterpenoids	-	2	-	275060	246690	270710	461030	337570	470060	112600	157310	225750	--	--
Cmbp005523	UPLC-MS/MS	Positive	417.12	163.04	416.111	C21H20O9	[M+H]+	-	-	1,3-O-Dicaffeoylglycerol	Lipids	Glycerol ester	-	2	-	52975	51530	54643	38315	42547	47959	54658	94988	56512	--	--
pmn001637	UPLC-MS/MS	Negative	417.08	285	418.09	C20H18O10	[M-H]-	-	-	Kaempferol-3-O-arabinoside (Juglanin)	Flavonoids	Flavonols	5041-67-8	3	-	15200	14535	17343	22933	19012	11046	26276	22957	21231	--	--
Lmbp003668	UPLC-MS/MS	Positive	419.1	287.05	418.09	C20H18O10	[M+H]+	-	-	Kaempferol-3-O-arabinoside	Flavonoids	Flavonoid	-	3	-	200860	177270	218480	191820	147220	144020	297100	350360	298740	--	--
pmn001663	UPLC-MS/MS	Negative	417.16	402.1	418.163	C22H26O8	[M-H]-	-	-	Syringaresinol	Lignans and Coumarins	Lignans	21453-69-0	1	-	60585	67047	65529	9703.6	8368.2	9449.6	162920	131030	152370	C10889	--
mws2523	UPLC-MS/MS	Negative	421.08	241.1	422.083	C12H23O14P	[M-H]-	-	-	Trehalose 6-phosphate	Others	Saccharides and Alcohols	4484-88-2	3	-	51981	51743	50013	68462	53595	49870	56385	56273	54668	C00689	ko00500,ko01100,ko01110
pmp001033	UPLC-MS/MS	Positive	423.09	405.08	422.085	C19H18O11	[M+H]+	-	-	Isomangiferin	Others	Xanthone	24699-16-9	2	-	210100	242900	220540	320420	297360	307380	289580	276390	240570	C16979	--
pmb0864	UPLC-MS/MS	Positive	426.26	285.24	425.254	C19H40NO7P	[M+H]+	-	-	LysoPE 14:0	Lipids	LPE	-	1	-	1721100	1766000	1738600	2148200	1867900	2014800	1446100	1187900	1431100	--	--
Lmhp008337	UPLC-MS/MS	Positive	426.26	285.24	425.254	C19H40NO7P	[M+H]+	-	-	LysoPE 14:0(2n isomer)	Lipids	LPE	-	1	-	65302	69861	83092	102220	93641	92327	67597	66284	72718	--	--
mad1424	UPLC-MS/MS	Positive	427.05	295.05	426.043	C17H14O13	[M+H]+	-	-	Ditartaroyl-hydroxycoumarin	Lignans and Coumarins	Coumarins	-	3	-	130690	114910	146930	199250	159830	197660	133080	126770	96661	--	--
pme2117	UPLC-MS/MS	Negative	426	159	427.029	C10H15N5O10P2	[M-H]-	-	-	Adenosine 5'-diphosphate	Nucleotides and derivatives	Nucleotides and derivatives	58-64-0	2	-	45174	52116	28020	62213	58163	72919	31351	33351	34459	C00008	ko00190,ko00195,ko00230,ko00908,ko01100,ko01110
Lmhn002574	UPLC-MS/MS	Negative	431.06	137.03	432.069	C20H16O11	[M-H]-	-	-	Caffeoyl(p-Hydroxybenzoyl)tartaric acid	Phenolic acids	Phenolic acids	-	3	-	27201	24936	11320	31663	16346	40224	9273.2	15368	11753	--	--
pmp000413	UPLC-MS/MS	Positive	433.11	283.06	432.106	C21H20O10	[M+H]+	-	-	Genistein-8-C-glucoside	Flavonoids	Isoflavones	66026-80-0	1	-	13380000	12799000	13788000	21569000	18632000	20567000	9472500	9495600	8735900	C10420	--
pme0321	UPLC-MS/MS	Negative	431.1	285	432.106	C21H20O10	[M-H]-	-	-	Kaempferol-7-O-rhamnoside	Flavonoids	Flavonols	20196-89-8	2	-	8563.3	7921.8	7200.7	19871	15385	14803	3171.6	3503.6	5092.5	--	--
pmb3006	UPLC-MS/MS	Negative	431.1	269.1	432.106	C21H20O10	[M-H]-	-	-	Apigenin-7-O-glucoside(Cosmosiin)	Flavonoids	Flavonoid	578-74-5	3	-	43494	48607	44521	71158	47012	44865	70026	63079	28569	C04608	ko00944
MWSHY0181	UPLC-MS/MS	Positive	433.11	313.07	432.106	C21H20O10	[M+H]+	-	-	Apigenin-8-C-Glucoside (Vitexin)	Flavonoids	Flavonoid	3681-93-4	1	-	13012000	13640000	13461000	20866000	17756000	19205000	9951600	9904400	9816100	C01460	ko00941,ko00944
MWSHY0008	UPLC-MS/MS	Positive	433.11	283.06	432.106	C21H20O10	[M+H]+	-	-	Isovitexin	Flavonoids	Flavonoid	38953-85-4	1	-	10433000	11459000	10059000	18940000	16891000	17141000	7503200	7236100	8401600	--	--
mws1434	UPLC-MS/MS	Negative	431.1	311	432.106	C21H20O10	[M-H]-	-	-	Apigenin-6-C-glucoside (Isovitexin)	Flavonoids	Flavonoid carbonoside	29702-25-8	1	-	10183000	9222100	11279000	14666000	13224000	14341000	5463500	5637400	5220500	C01714	ko00944
mws0919	UPLC-MS/MS	Negative	431.1	285	432.106	C21H20O10	[M-H]-	-	-	Kaempferol-3-O-rhamnoside (Afzelin)(Kaempferin)	Flavonoids	Flavonols	482-39-3	3	-	20909	19037	19874	24724	20539	21680	17970	20863	20650	C16911	ko00944
mws0895	UPLC-MS/MS	Negative	431.1	269	432.106	C21H20O10	[M-H]-	-	-	Genistein-7-O-Glucoside (Genistin)	Flavonoids	Isoflavones	529-59-9	2	-	33551	23028	20417	37596	23986	37064	9	9	9	C09126	ko00943
mws0072	UPLC-MS/MS	Positive	433.11	271.01	432.106	C21H20O10	[M+H]+	-	-	Apigenin-5-O-glucoside	Flavonoids	Flavonoid	28757-27-9	3	-	619030	601220	606410	952120	797130	935040	379970	365930	456670	--	--
Lmlp005572	UPLC-MS/MS	Positive	433.11	271.06	432.106	C21H20O10	[M+H]+	-	-	Galangin-7-O-glucoside	Flavonoids	Flavonoid	-	3	-	495680	502360	570300	658830	588330	575130	660210	651470	607100	--	--
Lmgp004731	UPLC-MS/MS	Positive	433.11	271.06	432.106	C21H20O10	[M+H]+	-	-	Genistein-7-O-galactoside	Flavonoids	Isoflavones	-	3	-	586160	492140	525340	635010	528720	579980	570690	583640	576790	--	--
Lmtn002324	UPLC-MS/MS	Negative	431.15	269.1	432.163	C19H28O11	[M-H]-	-	-	Benzyl-(2''-O-glucosyl)glucoside	Phenolic acids	Phenolic acids	-	3	-	18452	15494	23386	27107	18584	32256	9841.8	16432	19488	C17564	--
mws2162	UPLC-MS/MS	Positive	433.22	415.2	432.215	C24H32O7	[M+H]+	-	-	Schisandrol A	Lignans and Coumarins	Lignans	7432-28-2	2	-	16193	20259	17773	27230	17546	30646	17162	13297	15407	--	--
Lmsn002494	UPLC-MS/MS	Negative	433.04	301	434.049	C19H14O12	[M-H]-	-	-	Ellagic acid-4-O-Xyloside	Tannins	Tannin	139163-18-1	2	-	3104000	3377200	3451200	4499700	3054500	3812700	4175500	3332600	4277300	--	--
mws2186	UPLC-MS/MS	Positive	435.09	303	434.085	C20H18O11	[M+H]+	-	-	Avicularin(Quercetin-3-O-α-L-arabinofuranoside)	Flavonoids	Flavonols	572-30-5	1	-	5988000	6361400	5637500	7610300	6590700	6946100	5434200	6237800	6074300	--	--
Lmfp004055	UPLC-MS/MS	Positive	435.09	303.05	434.085	C20H18O11	[M+H]+	-	-	Morin-3-O-xyloside	Flavonoids	Flavonols	-	1	-	7787000	7642200	7391000	8857700	8447000	9393100	7875900	7759000	7744100	--	--
Lmfn004065	UPLC-MS/MS	Negative	433.08	300.03	434.085	C20H18O11	[M-H]-	-	-	Morin-3-O-arabinoside	Flavonoids	Flavonols	-	1	-	4747000	5328700	5612700	6183200	4971600	5835500	5237300	5717200	5511400	--	--
Lmfn004036	UPLC-MS/MS	Negative	433.08	300.03	434.085	C20H18O11	[M-H]-	-	-	Morin-3-O-lyxoside	Flavonoids	Flavonols	-	1	-	5052400	4587100	5775700	6701600	5136100	5413400	4815500	6528300	6362600	--	--
Lmdp003509	UPLC-MS/MS	Positive	435.09	303.06	434.085	C20H18O11	[M+H]+	-	-	Quercetin-3-O-xyloside (Reynoutrin)	Flavonoids	Flavonols	549-32-6	2	-	7720100	7833800	7343100	10041000	8626600	8836500	8048200	8028400	7465000	--	--
pme1611	UPLC-MS/MS	Negative	433.11	313	434.121	C21H22O10	[M-H]-	-	-	Isohemiphloin	Flavonoids	Flavonoid carbonoside	3682-02-8	2	-	333770	461030	363810	753430	593240	705700	204100	250560	337890	--	--
mws1179	UPLC-MS/MS	Negative	433.11	271	434.121	C21H22O10	[M-H]-	-	-	Naringenin-7-O-glucoside (Prunin)	Flavonoids	Dihydroflavone	529-55-5	1	-	654910	703420	764170	1103000	1193000	1143600	258020	319460	334750	C09099	ko00941
HJN090	UPLC-MS/MS	Negative	433.11	271.06	434.121	C21H22O10	[M-H]-	-	-	Butin-7-O-glucoside	Flavonoids	Flavonoid	-	2	-	499690	435770	384440	732740	579870	602010	230950	271360	297290	--	--
HJN087	UPLC-MS/MS	Negative	433.12	271.06	434.121	C21H22O10	[M-H]-	-	-	Naringenin-4'-O-glucoside	Flavonoids	Flavonoid	-	1	-	478560	457980	450960	755670	589400	736790	278560	237600	277300	--	--
Cmzn005251	UPLC-MS/MS	Negative	433.11	271.06	434.121	C21H22O10	[M-H]-	-	-	6-O-Caffeoylarbutin	Phenolic acids	Phenolic acids	136172-60-6	2	-	261280	293980	312880	388380	351360	340470	226740	245050	212630	--	--
HJN055	UPLC-MS/MS	Negative	435.13	273.08	436.136	C21H24O10	[M-H]-	-	-	Dihydrocharcone-4'-O-glucoside	Flavonoids	Chalcones	-	1	-	491240	604140	281780	334480	418010	480260	720120	634910	625100	--	--
mws2118	UPLC-MS/MS	Negative	435.13	166.7	436.137	C21H24O10	[M-H]-	-	-	Phloretin-2'-O-glucoside (Phlorizin)	Flavonoids	Chalcones	60-81-1	1	-	649760	604660	608960	1071000	935030	990460	386840	395060	461020	C01604	ko00941,ko01110
Lmfn004093	UPLC-MS/MS	Negative	435.13	315.09	436.137	C21H24O10	[M-H]-	-	-	Phloretin-4'-O-glucoside (Trilobatin)	Flavonoids	Chalcones	4192-90-9	1	-	4935600	4417400	5473900	11044000	8890100	10677000	1008000	952910	1259000	--	--
Lmhp009187	UPLC-MS/MS	Positive	440.28	299.26	439.27	C20H42NO7P	[M+H]+	-	-	LysoPE 15:0	Lipids	LPE	-	1	-	2963600	2728800	3071000	2843800	2619400	2668100	2290700	1662500	2398300	--	--
Lmhp008885	UPLC-MS/MS	Positive	440.28	299.26	439.27	C20H42NO7P	[M+H]+	-	-	LysoPE 15:0(2n isomer)	Lipids	LPE	-	1	-	146670	154440	130810	161270	145150	161510	115670	108010	101280	--	--
Lmhp005550	UPLC-MS/MS	Positive	441.2	177.05	440.195	C24H28N2O6	[M+H]+	-	-	N,N'-Diferuloylputrescine	Alkaloids	Phenolamine	42369-86-8	2	-	11752	10680	17539	15913	19640	13212	9	9249.3	5116.5	--	--
mws0355	UPLC-MS/MS	Negative	441.08	169.02	442.09	C22H18O10	[M-H]-	-	-	Catechin gallate*	Flavonoids	Flavanols	130405-40-2	3	-	12264	17322	20540	24348	26002	26161	11236	18540	13309	--	--
pme1014	UPLC-MS/MS	Positive	445.3	341.3	444.303	C31H40O2	[M+H]+	-	-	Menatetrenone (Vitamin K2)	Others	Vitamin	11032-49-8	2	-	171800	203520	247670	61341	78677	64574	53432	51378	80022	--	--
pmn001338	UPLC-MS/MS	Negative	445.08	283	446.085	C21H18O11	[M-H]-	-	-	Rhein-8-O-glucoside	Quinones	Anthraquinone	34298-86-7	3	-	20545	30963	29310	41533	37126	30738	12648	9667.2	6316.8	--	--
Zmhn003074	UPLC-MS/MS	Negative	445.11	283.07	446.121	C22H22O10	[M-H]-	-	-	Physcion-8-O-glucoside	Quinones	Anthraquinone	26296-54-8	3	-	6920.1	8222.7	8661.4	19072	14107	15848	11289	11308	9880.2	C10384	--
MWSslk229	UPLC-MS/MS	Positive	447.13	285.09	446.121	C22H22O10	[M+H]+	-	-	Calycosin-7-O-beta-D-glucoside	Flavonoids	Other Flavonoids	20633-67-4	2	-	75468	51696	41614	82666	96184	64882	16334	17815	21841	--	--
Cmsn003540	UPLC-MS/MS	Negative	445.21	385.19	446.215	C21H34O10	[M-H]-	-	-	Dendroside G	Terpenoids	Sesquiterpenoids	503443-66-1	1	-	1315000	1373000	1284500	1013000	998160	1087300	2156500	1969700	1995100	--	--
Lmhp007836	UPLC-MS/MS	Positive	448.25	307.23	447.239	C21H38NO7P	[M+H]+	-	-	LysoPE 16:3	Lipids	LPE	-	3	-	2519.3	2376	3332.5	3730.4	9	9	2388.6	6073.6	5785.2	--	--
Hmcp002316	UPLC-MS/MS	Positive	449.11	317.06	448.1	C21H20O11	[M+H]+	-	-	Isorhamnetin-3-O-arabinoside	Flavonoids	Flavonols	-	3	-	381970	399940	391430	535960	489970	499150	499500	439390	398620	--	--
Zmhn001905	UPLC-MS/MS	Negative	447.09	285.04	448.101	C21H20O11	[M-H]-	-	-	HydroxyAloe-emodin-8-O-glucoside	Quinones	Anthraquinone	-	2	-	53172	68705	83007	71270	67554	82006	64660	57073	54593	--	--
Xmyp005654	UPLC-MS/MS	Positive	449.11	287.06	448.101	C21H20O11	[M+H]+	-	-	Kaempferol-4'-O-glucoside	Flavonoids	Flavonoid	-	1	-	2448100	2648000	2313100	2855500	2533700	2786300	2949300	3477100	3139000	--	--
pme2459	UPLC-MS/MS	Positive	449.11	287.2	448.101	C21H20O11	[M+H]+	-	-	Luteolin-7-O-glucoside (Cynaroside)	Flavonoids	Flavonoid	5373-11-5	1	-	8014100	8690700	13052000	8880400	6047200	8958800	10803000	12932000	11142000	C03951	ko00944
MWSHY0136	UPLC-MS/MS	Positive	449.11	287.06	448.101	C21H20O11	[M+H]+	-	-	Kaempferol-3-O-glucoside (Astragalin)	Flavonoids	Flavonoid	480-10-4	1	-	2607800	2621700	2574100	3388300	2701300	2921800	2860300	3397500	2778000	C12249	ko00944,ko01110
mws1608	UPLC-MS/MS	Negative	447.09	357.1	448.101	C21H20O11	[M-H]-	-	-	Luteolin-6-C-glucoside (Isoorientin)	Flavonoids	Flavonoid carbonoside	4261-42-1	2	-	505250	495290	570470	1586500	997510	1278400	200370	175080	139940	C01821	--
mws1299	UPLC-MS/MS	Positive	449.11	299.2	448.101	C21H20O11	[M+H]+	-	-	Luteolin-8-C-glucoside (Orientin)	Flavonoids	Flavonoid carbonoside	28608-75-5	2	-	1865600	1692600	1590400	2958900	2763600	3138600	1014000	945770	1096800	C10114	--
mws0913	UPLC-MS/MS	Negative	447.09	285	448.101	C21H20O11	[M-H]-	-	-	Kaempferol-3-O-galactoside (Trifolin)	Flavonoids	Flavonols	23627-87-4	2	-	366420	362130	279980	385060	319200	309400	241300	321810	299620	C12626	ko00944
mws0089	UPLC-MS/MS	Negative	447.09	285.04	448.101	C21H20O11	[M-H]-	-	-	Kaempferol-7-O-glucoside	Flavonoids	Flavonols	16290-07-6	2	-	173890	276330	206670	230870	201580	212530	174180	163340	132880	--	--
mws0045	UPLC-MS/MS	Positive	449.11	303.05	448.101	C21H20O11	[M+H]+	-	-	Quercetin-3-O-rhamnoside(Quercitrin)	Flavonoids	Flavonols	522-12-3	1	-	24041000	24395000	22984000	32886000	31017000	31684000	18156000	18285000	16841000	C01750	ko00944
Lmlp003531	UPLC-MS/MS	Positive	449.11	287.06	448.101	C21H20O11	[M+H]+	-	-	Luteolin-3'-O-glucoside	Flavonoids	Flavonoid	5154-41-6	1	-	354140	297790	324280	260400	347790	388450	331120	430780	163140	--	--
Hmpp003270	UPLC-MS/MS	Positive	449.11	287.05	448.101	C21H20O11	[M+H]+	-	-	Luteolin-4'-O-glucoside	Flavonoids	Flavonoid	6920-38-3	3	-	2297600	2199000	2395300	2629600	2180300	2360300	2778100	2841600	2509500	--	--
pmn001640	UPLC-MS/MS	Negative	449.07	316	450.08	C20H18O12	[M-H]-	-	-	Myricetin-3-O-arabinoside	Flavonoids	Flavonols	132679-85-7	3	-	12571	22668	24320	27387	14946	5930.2	7550.5	21986	15784	--	--
MWS20145	UPLC-MS/MS	Positive	451.12	289.07	450.116	C21H22O11	[M+H]+	-	-	eriodictyol 7-O-β-D-glucopyranoside	Flavonoids	Dihydroflavone	-	1	-	68238	80918	76690	106360	107080	91170	140000	110450	105200	--	--
mws1361	UPLC-MS/MS	Negative	449.11	151	450.116	C21H22O11	[M-H]-	-	-	Taxifolin-3-O-rhamnoside (Astilbin)	Flavonoids	Dihydroflavonol	29838-67-3	2	-	28582	24862	30338	45889	52538	47768	9	9	9	C17449	--
mws0057	UPLC-MS/MS	Positive	451.12	289	450.116	C21H22O11	[M+H]+	-	-	Eriodictyol-7-O-glucoside	Flavonoids	Dihydroflavone	38965-51-4	2	-	21760	20009	20942	34243	17722	27913	67950	22318	10762	--	--
Lmtn002796	UPLC-MS/MS	Negative	449.1	287.05	450.116	C21H22O11	[M-H]-	-	-	Aromadendrin-7-O-glucoside	Flavonoids	Flavonoid	28189-90-4	3	-	441220	443080	423970	1070100	805880	628020	140630	183060	151130	--	--
Lmsp004301	UPLC-MS/MS	Positive	451.12	289.07	450.116	C21H22O11	[M+H]+	-	-	3',5,5',7-Tetrahydroxyflavanone-7-O-glucoside	Flavonoids	Dihydroflavone	-	1	-	764610	791740	733510	1160400	1205100	1243700	653690	529130	662450	--	--
Lmmn004625	UPLC-MS/MS	Negative	449.11	287.06	450.116	C21H22O11	[M-H]-	-	-	Dihydrokaempferol-7-O-glucoside	Flavonoids	Flavonols	-	2	-	147110	138120	163700	141310	126490	134720	225700	222200	114050	--	--
HJN086	UPLC-MS/MS	Negative	449.11	287.06	450.116	C21H22O11	[M-H]-	-	-	Eriodictyol-3'-O-glucoside	Flavonoids	Dihydroflavone	-	1	-	79411	155240	114520	157790	129990	150140	134600	106760	165930	--	--
MWSmce674	UPLC-MS/MS	Positive	451.36	89.06	450.35	C31H46O2	[M+H]+	-	-	Phylloquinone (Vitamin K1)	Others	Vitamin	84-80-0	3	-	31365	27188	27331	32140	36344	31135	36007	31995	31057	--	--
Lmhp009034	UPLC-MS/MS	Positive	452.28	311.26	451.27	C21H42NO7P	[M+H]+	-	-	LysoPE 16:1	Lipids	LPE	-	3	-	9074.6	8616.6	6606	10766	12132	12042	4476.1	2676.8	5060.1	--	--
HJN041	UPLC-MS/MS	Negative	451.12	289.07	452.131	C21H24O11	[M-H]-	-	-	Epicatechin glucoside	Flavonoids	Flavanols	-	2	-	76484	66950	81284	8461.3	8829	10548	211080	171980	161290	--	--
Lmsn004797	UPLC-MS/MS	Negative	451.12	167.03	452.132	C21H24O11	[M-H]-	-	-	3-Hydroxyphloretin-4'-O-glucoside	Flavonoids	Chalcones	-	3	-	77916	76476	59406	157370	96070	119550	5802.6	16905	15460	--	--
pmd0160	UPLC-MS/MS	Positive	454.29	313.27	453.286	C21H44NO7P	[M+H]+	-	-	LysoPE 16:0(2n isomer)	Lipids	LPE	-	1	-	4567400	4938400	5033100	4194700	4282000	3891900	2467300	1495600	3397500	--	--
pmb0876	UPLC-MS/MS	Positive	454.29	313.27	453.286	C21H44NO7P	[M+H]+	-	-	LysoPE 16:0	Lipids	LPE	53862-35-4	1	-	4936500	4889100	4999600	4355300	4466500	3806100	2515900	1521400	3475200	--	--
MWS5083	UPLC-MS/MS	Negative	455.1	96.97	456.105	C17H21N4O9P	[M-H]-	-	-	Flavin Single Nucleotide(FMN)	Nucleotides and derivatives	Nucleotides and derivatives	6184-17-4	1	-	179260	176170	162850	216940	208440	183070	121880	180080	100900	C00061	ko00190,ko00740,ko01100,ko01110
Zmjn014062	UPLC-MS/MS	Negative	455.35	455.35	456.36	C30H48O3	[M-H]-	-	-	(23S)-3β-hydroxydammara-21-oic acid 21,23-lactone	Terpenoids	Triterpene	-	2	-	6470.7	5276.4	4196.6	6571.4	6489.4	3555.9	2018	4362.6	4615.6	--	--
pmn001700	UPLC-MS/MS	Negative	455.35	455.35	456.36	C30H48O3	[M-H]-	-	-	24,30-Dihydroxy-12(13)-enolupinol	Terpenoids	Triterpene	-	1	-	11995	13916	12639	10610	11613	7354.8	2945.3	9752	14721	--	--
HJN110	UPLC-MS/MS	Negative	455.36	455.36	456.36	C30H48O3	[M-H]-	-	-	Betulinic acid	Terpenoids	Triterpene	472-15-1	1	-	5888.6	3293.4	5804.7	3622.6	4154.7	4158.3	9	1946	2112.6	C08619	--
mws2220	UPLC-MS/MS	Negative	457.08	169.02	458.085	C22H18O11	[M-H]-	-	-	Gallocatechin 3-O-gallate	Flavonoids	Flavanols	5127-64-0	3	-	17552	21873	11606	21094	43916	28283	30938	6399	14938	--	--
mws0034	UPLC-MS/MS	Negative	457.08	169.01	458.085	C22H18O11	[M-H]-	-	-	Epigallocatechin-3-gallate	Flavonoids	Flavanols	989-51-5	3	-	11166	10655	15341	34317	25872	26693	22084	10139	12785	C09731	--
pmb2654	UPLC-MS/MS	Negative	460.1	117.9	461.153	C19H27NO12	[M-H]-	-	-	Anthranilate-1-O-Sophoroside	Phenolic acids	Phenolic acids	-	3	-	92187	85651	102360	73892	88544	81005	88733	87506	71088	--	--
pmn001702	UPLC-MS/MS	Negative	461.07	285.05	462.08	C21H18O12	[M-H]-	-	-	Tetahydroxyflavone-7-O-glucuronide	Flavonoids	Flavonoid	-	2	-	45294	43826	39818	37809	35528	32418	40705	55342	37077	--	--
Lmzn001894	UPLC-MS/MS	Negative	461.07	285.04	462.08	C21H18O12	[M-H]-	-	-	Kaempferol-3-O-glucuronide	Flavonoids	Flavonols	22688-78-4	3	-	28796	34612	42716	30636	28630	48796	39727	39523	46436	--	--
pmp000579	UPLC-MS/MS	Positive	463.12	301.07	462.116	C22H22O11	[M+H]+	-	-	Diosmetin-7-O-galactoside*	Flavonoids	Flavonoid	-	2	-	889760	1024800	876420	827490	788220	791830	1568900	1538500	1413700	--	--
pmp000120	UPLC-MS/MS	Positive	463.12	427.1	462.116	C22H22O11	[M+H]+	-	-	Diosmetin-6-C-glucoside	Flavonoids	Flavonoid	-	2	-	234450	232310	205270	423360	381840	411710	139840	143130	138920	--	--
pmb3012	UPLC-MS/MS	Negative	461.11	299.2	462.116	C22H22O11	[M-H]-	-	-	Chrysoeriol-7-O-glucoside*	Flavonoids	Flavonoid	19993-32-9	2	-	941450	908740	710360	621820	855970	772640	602570	852000	627600	--	--
pmb2999	UPLC-MS/MS	Negative	461.11	299.1	462.116	C22H22O11	[M-H]-	-	-	Chrysoeriol-5-O-glucoside	Flavonoids	Flavonoid	-	3	-	5354000	4946500	4316100	3487700	4195700	2850200	5186200	4949100	6666300	--	--
Lmnp002845	UPLC-MS/MS	Positive	463.13	343.09	462.116	C22H22O11	[M+H]+	-	-	Hispidulin-8-C-glucoside*	Flavonoids	Flavonoid carbonoside	-	3	-	415930	409610	408330	843750	666800	879580	262100	297500	204630	--	--
Lmjp003655	UPLC-MS/MS	Positive	463.12	301.08	462.116	C22H22O11	[M+H]+	-	-	6-C-MethylKaempferol-3-glucoside	Flavonoids	Flavonoid	-	3	-	1045400	898240	755650	794660	843750	780680	1380400	1462200	1464800	--	--
Hmmp004965	UPLC-MS/MS	Positive	463.12	301.07	462.116	C22H22O11	[M+H]+	-	-	Diosmetin-7-O-Beta-D-Glucopyranoside	Flavonoids	Flavonoid	20126-59-4	3	-	803450	721190	793330	747150	649620	711100	1218600	1448400	1124400	--	--
Hmcp002539	UPLC-MS/MS	Positive	463.12	317.06	462.116	C22H22O11	[M+H]+	-	-	Isorhamnetin-3-O-rhamnoside	Flavonoids	Flavonols	-	3	-	585920	575610	614630	1074900	826690	915610	546810	532830	524280	--	--
HJAP011	UPLC-MS/MS	Positive	463.11	343.08	462.116	C22H22O11	[M+H]+	-	-	Chrysoeriol-8-C-glucoside (Scoparin)*	Flavonoids	Flavonoid	301-16-6	3	-	455130	444460	444000	856230	716450	791100	300480	239110	217380	--	--
Hmgp002189	UPLC-MS/MS	Positive	463.13	301.07	462.118	C22H22O11	[M+H]+	-	-	Hispidulin-7-O-Glucoside*	Flavonoids	Flavonoid	17680-84-1	3	-	898060	886540	900120	946580	871290	813250	1295300	1450700	1371300	C17762	--
Smgp004575	UPLC-MS/MS	Positive	465.1	303.05	464.095	C21H20O12	[M+H]+	-	-	Quercetin-5-O-β-D-glucoside	Flavonoids	Flavonoid	-	1	-	7078200	6891500	6409900	7433700	6178700	5918100	8685200	8419600	8648000	--	--
pmp001309	UPLC-MS/MS	Positive	465.1	303.1	464.095	C21H20O12	[M+H]+	-	-	6-Hydroxykaempferol-7-O-glucoside	Flavonoids	Flavonols	-	1	-	5369300	4940900	4763700	4980700	6476000	5862200	5785600	6516700	8679700	--	--
MWSHY0046	UPLC-MS/MS	Positive	465.1	303.05	464.095	C21H20O12	[M+H]+	-	-	Isoquercitrin	Flavonoids	Flavonoid	21637-25-2	1	-	7149700	6667500	6328100	6840500	6489900	6678500	8514000	8029100	8470300	--	--
mws1329	UPLC-MS/MS	Negative	463.09	300.7	464.095	C21H20O12	[M-H]-	-	-	Quercetin-7-O-glucoside*	Flavonoids	Flavonols	491-50-9	1	-	2035200	2033000	1956500	2225500	2863700	3112500	1874800	1428200	1714700	C12639	--
mws0856	UPLC-MS/MS	Negative	463.09	301	464.095	C21H20O12	[M-H]-	-	-	Quercetin-4'-O-glucoside (Spiraeoside)	Flavonoids	Flavonols	20229-56-5	2	-	7291100	7640300	7160900	9807700	9085300	7403100	8040800	8652100	8561300	--	--
mws0091	UPLC-MS/MS	Negative	463.09	300.03	464.095	C21H20O12	[M-H]-	-	-	Quercetin-3-O-glucoside (Isoquercitrin)*	Flavonoids	Flavonols	482-35-9	1	-	160620	249320	148430	272780	265850	363530	151220	141880	155100	C05623	ko00944,ko01100,ko01110
mws0061	UPLC-MS/MS	Negative	463.09	300	464.095	C21H20O12	[M-H]-	-	-	Quercetin-3-O-galactoside (Hyperin)	Flavonoids	Flavonols	482-36-0	1	-	3594600	3333800	4212100	3577400	4596300	3538300	3428900	4038400	3566300	C10073	--
Lmdp003286	UPLC-MS/MS	Positive	465.1	303.06	464.095	C21H20O12	[M+H]+	-	-	Isohyperoside	Flavonoids	Flavonols	35589-21-0	2	-	7333000	7095500	6788100	6839900	5868100	6272600	8563700	9038900	8532000	--	--
Hmcn001884	UPLC-MS/MS	Negative	463.09	301.03	464.095	C21H20O12	[M-H]-	-	-	6-Hydroxyluteolin 5-glucoside	Flavonoids	Flavonoid	-	2	-	32006000	32911000	30462000	30696000	28740000	32322000	33284000	35992000	35190000	--	--
Lmzp002365	UPLC-MS/MS	Positive	465.14	303.09	464.131	C22H24O11	[M+H]+	-	-	Hesperetin-7-O-glucoside	Flavonoids	Flavonoid	31712-49-9	2	-	14348000	13325000	14017000	18039000	15896000	16737000	11934000	12127000	10860000	C16422	ko00941
pme1598	UPLC-MS/MS	Negative	463.12	301	464.132	C22H24O11	[M-H]-	-	-	Hesperetin-5-O-glucoside	Flavonoids	Dihydroflavonol	69651-80-5	1	-	8784600	7054100	8316900	8760400	8630900	7110900	9305800	8562300	7884900	--	--
Lmhp009769	UPLC-MS/MS	Positive	466.29	325.27	465.286	C22H44NO7P	[M+H]+	-	-	LysoPE 17:1	Lipids	LPE	-	3	-	4690.3	5581.1	6347.2	2860.5	6938.4	2105.4	3590.1	5327.3	6074.9	--	--
Xmsn002700	UPLC-MS/MS	Negative	465.13	303.06	466.111	C21H22O12	[M-H]-	-	-	Taxifolin-3'-O-glucoside	Flavonoids	Flavonoid	31106-05-5	2	-	750940	945680	879800	903990	834620	1048200	1110500	1204200	1108800	--	--
pmd0130	UPLC-MS/MS	Positive	468.31	184.07	467.301	C22H46NO7P	[M+H]+	-	-	LysoPC 14:0	Lipids	LPC	20559-16-4	1	-	2659700	2781200	2947000	4368000	3811800	3975800	2150400	2061000	1995300	--	--
Lmhp010162	UPLC-MS/MS	Positive	468.31	327.29	467.301	C22H46NO7P	[M+H]+	-	-	LysoPE 17:0	Lipids	LPE	-	2	-	18874	21178	21899	16885	26742	17487	8195.6	5819.4	10819	--	--
Hmmp002121	UPLC-MS/MS	Positive	469.12	317.08	468.113	C23H16O11	[M+H]+	-	-	Isorhamnetin-3-O-gallate	Flavonoids	Flavonols	-	3	-	25237	32341	40245	45260	32490	48636	9	9	16582	--	--
Lmmp003167	UPLC-MS/MS	Positive	470.23	220.1	469.221	C25H31N3O6	[M+H]+	-	-	Bis(Caffeoyl)Spermidine	Alkaloids	Phenolamine	124935-80-4	1	-	146360	174340	156940	9	9	9	462340	485600	477920	--	--
pmp001246	UPLC-MS/MS	Positive	472.21	251.09	472.191	C22H34NO10+	[M]+	-	-	Sinapine-4-O-Glucoside	Alkaloids	Alkaloids	-	1	-	183040	211020	232800	413050	308400	354220	256950	251640	241790	--	--
pmb1912	UPLC-MS/MS	Positive	474.17	327	473.166	C20H23N7O7	[M+H]+	-	-	10-Formyltetrahydrofuran	Alkaloids	Alkaloids	2800-34-2	2	-	379920	436680	383890	903570	607530	766930	442350	505740	417100	C00234	ko00670,ko00970,ko01100,ko01200
mws1714	UPLC-MS/MS	Negative	473.07	149.01	474.08	C22H18O12	[M-H]-	-	-	Chicoric Acid	Phenolic acids	Phenolic acids	70831-56-0	3	-	12379	8991.5	19937	27569	7916.8	15373	13252	28354	22253	C10437	--
Lmhp008801	UPLC-MS/MS	Positive	476.28	335.26	475.27	C23H42NO7P	[M+H]+	-	-	LysoPE 18:3	Lipids	LPE	-	1	-	532830	511330	505470	757070	637210	671840	359660	361150	421000	--	--
Lmhp008589	UPLC-MS/MS	Positive	476.28	335.26	475.27	C23H42NO7P	[M+H]+	-	-	LysoPE 18:3(2n isomer)	Lipids	LPE	-	1	-	494960	522340	505950	717560	650430	643950	368780	326420	380290	--	--
pmn001641	UPLC-MS/MS	Negative	475.09	300	476.095	C22H20O12	[M-H]-	-	-	Kaempferide-3-O-glucuronide	Flavonoids	Flavonols	-	3	-	57369	63837	73161	115740	116640	101710	15658	20845	18528	--	--
pmb0881	UPLC-MS/MS	Positive	478.29	337.27	477.286	C23H44NO7P	[M+H]+	-	-	LysoPE 18:2	Lipids	LPE	-	2	-	1500400	1520400	1859400	2060100	2109100	2017100	1528700	1207000	1718200	--	--
pmb0874	UPLC-MS/MS	Positive	478.29	337.27	477.286	C23H44NO7P	[M+H]+	-	-	LysoPE 18:2(2n isomer)	Lipids	LPE	-	1	-	1606900	1932500	1630700	2217400	1775400	1855200	1235500	1015600	1680600	--	--
Lmyp004444	UPLC-MS/MS	Positive	479.12	317.06	478.111	C22H22O12	[M+H]+	-	-	Tricin-4'-methylether-3'-O-glucoside	Flavonoids	Flavonols	-	3	-	6797600	6259000	5944400	8763000	7580700	8256300	5239400	6344900	5915300	--	--
Lmjp003295	UPLC-MS/MS	Positive	479.12	317.07	478.111	C22H22O12	[M+H]+	-	-	6-Methoxykaempferol-3-O-glucoside	Flavonoids	Flavonoid	63422-27-5	1	-	10677000	11511000	9483600	13727000	14196000	15716000	3297800	7837700	5683100	--	--
Lmjp003044	UPLC-MS/MS	Positive	479.12	317.06	478.111	C22H22O12	[M+H]+	-	-	Isorhamnetin-3-O-Glucoside*	Flavonoids	Flavonols	5041-82-7	1	-	7007100	5909400	5916000	9520300	7604500	8195500	5953400	6332700	5078700	--	--
Lmjp002906	UPLC-MS/MS	Positive	479.12	317.07	478.111	C22H22O12	[M+H]+	-	-	Rhamnetin-3-O-Glucoside	Flavonoids	Flavonols	27875-34-9	1	-	6130400	6207100	5710300	8848800	6936800	7507200	6002800	6058700	5290900	--	--
Hmcp002207	UPLC-MS/MS	Positive	479.12	317.06	478.111	C22H22O12	[M+H]+	-	-	Isorhamnetin-7-O-glucoside (Brassicin)*	Flavonoids	Flavonols	6743-96-0	1	-	6895900	5890100	4855900	9149000	7673600	7227500	5650900	5431300	5392600	--	--
Hmgp002148	UPLC-MS/MS	Positive	479.12	317.06	478.112	C22H22O12	[M+H]+	-	-	Nepetin-7-O-alloside	Flavonoids	Flavonoid	-	1	-	5341500	6333900	6758000	8393600	7227100	8463400	5914300	6125000	5424900	--	--
Hmgp002036	UPLC-MS/MS	Positive	479.12	317.06	478.112	C22H22O12	[M+H]+	-	-	Nepetin-7-O-glucoside	Flavonoids	Flavonoid	569-90-4	1	-	12614000	10404000	15491000	13293000	12002000	16806000	7459100	5556300	4596400	--	--
mws1454	UPLC-MS/MS	Negative	477.14	315	478.148	C23H26O11	[M-H]-	-	-	Persicoside	Flavonoids	Dihydroflavone	28978-03-2	3	-	318510	290630	276030	328930	350650	317530	263050	275760	269690	--	--
pmb2260	UPLC-MS/MS	Positive	480.31	184.07	479.301	C23H46NO7P	[M+H]+	-	-	LysoPC 15:1	Lipids	LPC	-	3	-	9307.7	6914.6	7383.1	17173	11620	11437	3878.9	9	9	--	--
pmb0856	UPLC-MS/MS	Positive	480.31	339.29	479.301	C23H46NO7P	[M+H]+	-	-	LysoPE 18:1(2n isomer)	Lipids	LPE	-	3	-	98967	91163	91575	83702	89960	66038	57857	39401	79015	--	--
mws0289	UPLC-MS/MS	Positive	480.31	339.29	479.301	C23H46NO7P	[M+H]+	-	-	LysoPE 18:1	Lipids	LPE	89576-29-4	3	-	139420	132700	136330	125830	125140	98374	77780	56864	115910	--	--
Lmpp003465	UPLC-MS/MS	Positive	481.1	319.04	480.09	C21H20O13	[M+H]+	-	-	Myricetin-3-O-glucoside*	Flavonoids	Flavonols	19833-12-6	2	-	818160	474010	523440	374790	307980	345350	827320	791210	947110	--	--
Lmdp002969	UPLC-MS/MS	Positive	481.1	319.06	480.09	C21H20O13	[M+H]+	-	-	Myricetin-3-O-galactoside*	Flavonoids	Flavonols	15648-86-9	2	-	566630	660990	706250	410200	395340	450330	981950	1181900	1087200	--	--
pmb2319	UPLC-MS/MS	Positive	482.32	184.07	481.317	C23H48NO7P	[M+H]+	-	-	LysoPC 15:0	Lipids	LPC	108273-89-8	1	-	5257600	5068700	5343300	5947400	5706000	5454200	3835400	3100600	4016300	--	--
pmb0883	UPLC-MS/MS	Positive	482.32	341.31	481.317	C23H48NO7P	[M+H]+	-	-	LysoPE 18:0	Lipids	LPE	69747-55-3	3	-	146910	132870	162670	54923	84966	47169	22256	14837	61085	--	--
Lmhp009129	UPLC-MS/MS	Positive	482.32	184.07	481.317	C23H48NO7P	[M+H]+	-	-	LysoPC 15:0(2n isomer)	Lipids	LPC	-	1	-	643240	639700	666100	833950	691410	785660	545720	473520	563450	--	--
HJN104	UPLC-MS/MS	Negative	481.14	319.08	482.105	C21H22O13	[M-H]-	-	-	Dihydromyricetin-3-O-glucoside	Flavonoids	Dihydroflavonol	-	2	-	196220	234210	196990	265910	224720	284470	295780	250210	240760	--	--
pmb3072	UPLC-MS/MS	Negative	481.14	319.3	482.142	C22H26O12	[M-H]-	-	-	3-O-p-Coumaroylshikimic acid-O-glucoside	Phenolic acids	Phenolic acids	-	2	-	172690	196160	217700	268810	237820	254100	239510	305610	184410	--	--
pmb3066	UPLC-MS/MS	Negative	481.14	319.2	482.142	C22H26O12	[M-H]-	-	-	5-O-p-Coumaroylshikimic acid O-glucoside	Phenolic acids	Phenolic acids	-	2	-	37141	50721	44287	32769	36877	24634	96519	88931	94776	--	--
Hmyn007168	UPLC-MS/MS	Negative	483.27	255.23	484.278	C22H45O9P	[M-H]-	-	-	LysoPG 16:0	Lipids	Glycerol ester	-	2	-	6398.2	4615.4	3897.1	106910	87417	99169	139600	65823	61066	--	--
Lmmp003903	UPLC-MS/MS	Positive	491.12	287.05	490.111	C23H22O12	[M+H]+	-	-	Kaempferol-3-O-(2''-acetyl)glucoside	Flavonoids	Flavonols	-	3	-	10579	8069.4	10116	20837	22805	20666	9	4870.2	9	--	--
pmb0863	UPLC-MS/MS	Positive	492.31	184.07	491.301	C24H46NO7P	[M+H]+	-	-	LysoPC 16:2(2n isomer)	Lipids	LPC	-	3	-	6489.1	6588.6	6113.9	15608	10102	12686	3428.8	2537.2	3547.6	--	--
pma1303	UPLC-MS/MS	Positive	492.31	184.07	491.301	C24H46NO7P	[M+H]+	-	-	LysoPC 16:2	Lipids	LPC	-	2	-	8861.1	6244.8	4931.6	10851	10464	11916	4045.6	4863.1	3352.3	--	--
pmb3042	UPLC-MS/MS	Negative	491.12	329.1	492.127	C23H24O12	[M-H]-	-	-	Tricin-5-O-Glucoside	Flavonoids	Flavonoid	32769-00-9	3	-	1545800	1592900	1898600	1669500	1629300	1487300	1822500	1588500	1940400	--	--
pmb0736	UPLC-MS/MS	Positive	493.13	331.08	492.127	C23H24O12	[M+H]+	-	-	Tricin-7-O-Glucoside	Flavonoids	Flavonoid	32769-01-0	1	-	12079000	12539000	12411000	12343000	11491000	12248000	15049000	16309000	14313000	--	--
Lmgp004829	UPLC-MS/MS	Positive	493.13	331.08	492.127	C23H24O12	[M+H]+	-	-	5,7,4'-Trihydroxy-6,8-dimethoxyisoflavone-7-O-galactoside	Flavonoids	Isoflavones	-	1	-	12184000	12612000	11883000	12745000	11870000	11919000	15554000	16436000	15606000	--	--
Lmgp003546	UPLC-MS/MS	Positive	493.13	331.08	492.127	C23H24O12	[M+H]+	-	-	4',5'-Dihydroxy-6,8-dimethoxyisoflavone-7-O-galactoside	Flavonoids	Isoflavones	-	1	-	13379000	12615000	12369000	12203000	12564000	11890000	14962000	14955000	15148000	--	--
Hmgp002238	UPLC-MS/MS	Positive	493.14	331.08	492.128	C23H24O12	[M+H]+	-	-	Jaceosidin-7-O-Glucoside	Flavonoids	Flavonoid	25474-11-7	3	-	11771000	12417000	12581000	14420000	11263000	12738000	15675000	16716000	15032000	--	--
pmp001270	UPLC-MS/MS	Positive	494.32	184.07	493.317	C24H48NO7P	[M+H]+	-	-	LysoPC 16:1	Lipids	LPC	76790-27-7	3	-	11899	9581.3	18613	40531	23138	26396	9212.3	7572.6	6366.4	--	--
Lmtn002997	UPLC-MS/MS	Negative	493.1	331.05	494.106	C22H22O13	[M-H]-	-	-	Mearnsetin-3-O-glucoside	Flavonoids	Flavonoid	-	2	-	90369	124310	109160	200190	123960	276940	89028	69212	63474	--	--
pmd0132	UPLC-MS/MS	Positive	496.34	184.07	495.332	C24H50NO7P	[M+H]+	-	-	LysoPC 16:0(2n isomer)	Lipids	LPC	-	1	-	13759000	14164000	13907000	15546000	15049000	13254000	7767600	5035700	8952500	--	--
pmb0855	UPLC-MS/MS	Positive	496.34	184.07	495.332	C24H50NO7P	[M+H]+	-	-	LysoPC 16:0	Lipids	LPC	17364-16-8	1	-	14244000	13715000	14036000	15805000	15096000	13798000	7796200	5220500	9482700	--	--
pma0170	UPLC-MS/MS	Positive	498.26	177.05	497.253	C27H35N3O6	[M+H]+	-	-	N',N''-Diferuloylspermidine	Alkaloids	Phenolamine	-	2	-	89851	73737	72750	9	9	9	210620	239970	180230	--	--
Lmhn003799	UPLC-MS/MS	Negative	501.1	307.05	502.111	C24H22O12	[M-H]-	-	-	Feruloylferuloyltartaric acid	Phenolic acids	Phenolic acids	-	3	-	12494	14405	15253	21828	18838	21196	13232	9191.2	9029.4	--	--
Lmhp010040	UPLC-MS/MS	Positive	504.31	363.29	503.301	C25H46NO7P	[M+H]+	-	-	LysoPE 20:3	Lipids	LPE	-	3	-	4958.3	3507.5	3939.4	5558.5	4479.5	4269.1	3021	1767.4	2637	--	--
pmn001642	UPLC-MS/MS	Negative	503.08	459.1	504.09	C23H20O13	[M-H]-	-	-	Kaempferol-3-O-(2''-O-acetyl)glucuronide	Flavonoids	Flavonols	-	3	-	42649	54321	40003	77293	68327	92228	75432	51144	50226	--	--
pmb3000	UPLC-MS/MS	Negative	503.12	341.1	504.127	C24H24O12	[M-H]-	-	-	Chrysoeriol-7-O-(6''-acetyl)glucoside	Flavonoids	Flavonoid	-	3	-	112030	111220	134340	94199	108940	74200	120170	76003	103080	--	--
pme2125	UPLC-MS/MS	Negative	503.16	179	504.169	C18H32O16	[M-H]-	-	-	Raffinose*	Others	Saccharides and Alcohols	512-69-6	2	-	15165	27374	13189	17122	16227	9443.3	10340	21346	26736	C00492	ko00052,ko01100,ko02010
mws1589	UPLC-MS/MS	Negative	503.16	179	504.169	C18H32O16	[M-H]-	-	-	D-Panose*	Others	Saccharides and Alcohols	33401-87-5	1	-	7619.7	7601.6	9149.1	2640.6	3739.3	2715.2	8693.5	13255	10964	C00713	--
Lmhp008718	UPLC-MS/MS	Positive	506.32	184.07	505.317	C25H48NO7P	[M+H]+	-	-	LysoPC 17:2	Lipids	LPC	-	3	-	22473	19028	22018	42516	29923	37471	21158	19701	13843	--	--
Hmln002199	UPLC-MS/MS	Negative	505.1	300.03	506.107	C23H22O13	[M-H]-	-	-	Quercetin-3-O-(6''-acetyl)galactoside	Flavonoids	Flavonols	-	2	-	518450	816940	526660	803300	711850	573040	576860	844620	914480	--	--
pmp000013	UPLC-MS/MS	Positive	507.15	345.09	506.142	C24H26O12	[M+H]+	-	-	Eupatilin-7-O-glucoside	Flavonoids	Flavonoid	-	2	-	90447	95749	96953	149600	116130	137860	104700	120980	114300	--	--
Lmhp009590	UPLC-MS/MS	Positive	508.34	184.07	507.332	C25H50NO7P	[M+H]+	-	-	LysoPC 17:1	Lipids	LPC	-	3	-	16078	17914	16441	22242	23939	22163	11548	8995.7	11194	--	--
Hmcp002187	UPLC-MS/MS	Positive	509.13	347.07	508.121	C23H24O13	[M+H]+	-	-	Limocitrin-3-O-galactoside	Flavonoids	Flavonoid	-	3	-	349110	363500	279370	206080	207880	231890	551550	560420	388680	--	--
Zmjp004852	UPLC-MS/MS	Positive	509.13	347.08	508.122	C23H24O13	[M+H]+	-	-	5,6,3′,4′-Tetrahydroxy-3,7-dimethoxyflavone-6-O-glucoside	Flavonoids	Flavonoid	-	3	-	249540	314000	273320	221800	173570	203870	455280	563580	472590	--	--
HJAP006	UPLC-MS/MS	Positive	509.13	347.08	508.122	C23H24O13	[M+H]+	-	-	Syringetin-7-O-glucoside	Flavonoids	Flavonoid	-	3	-	330330	277660	301820	212280	223790	199060	507230	532900	451090	--	--
pmb2406	UPLC-MS/MS	Positive	510.36	184.07	509.348	C25H52NO7P	[M+H]+	-	-	LysoPC 17:0	Lipids	LPC	50930-23-9	1	-	2004100	1783600	2007600	1779900	1912500	1485400	645620	344940	1061800	--	--
Cmsn002383	UPLC-MS/MS	Negative	509.2	179.07	510.21	C25H34O11	[M-H]-	-	-	(7S,8S-Threo-3',4,7,9-tetrahydroxy-3-methoxy-8-O-4'-neolignan-9'-O-rhamnoside	Lignans and Coumarins	Lignans	-	2	-	147020	144490	153130	299660	280380	383200	48837	29239	42263	--	--
Lmhp009773	UPLC-MS/MS	Positive	515.32	261.22	514.314	C27H46O9	[M+H]+	-	-	1-α-Linolenoyl-glycerol-3-O-glucoside	Lipids	Glycerol ester	-	1	-	35996	37684	29803	75889	65111	48129	22830	27613	20754	--	--
Lmhp009526	UPLC-MS/MS	Positive	515.32	261.22	514.314	C27H46O9	[M+H]+	-	-	2-α-Linolenoyl-glycerol-1-O-glucoside	Lipids	Glycerol ester	-	2	-	43736	35202	42259	58017	60276	69425	23942	26525	18255	--	--
Hmqp006235	UPLC-MS/MS	Positive	516.3	184.07	515.297	C26H46NO7P	[M+H]+	-	-	LysoPC 18:4	Lipids	LPC	-	3	-	3974.8	3967.5	4623.7	7593.6	6495.3	5835.2	4117.9	6740.2	8580.5	--	--
Zmhn000785	UPLC-MS/MS	Negative	515.16	341.11	516.169	C19H32O16	[M-H]-	-	-	Di-O-Glucosylquinic acid	Phenolic acids	Phenolic acids	-	1	-	413400	501520	439280	300640	352930	355870	153160	154220	221710	--	--
pmn001498	UPLC-MS/MS	Negative	575.35	279.2	516.335	C33H44N2O3	[M+CH3COOH-H]-	-	-	Isodendrocrepine	Alkaloids	Alkaloids	50906-94-0	1	-	232010	264770	256150	413970	343480	312640	136910	126680	174970	--	--
pmn001497	UPLC-MS/MS	Negative	575.35	279.2	516.335	C33H44N2O3	[M+CH3COOH-H]-	-	-	Dendrocrepine	Alkaloids	Alkaloids	51020-39-4	1	-	206050	221700	228350	228460	178400	202720	218960	208230	304000	--	--
pmb0865	UPLC-MS/MS	Positive	518.32	184.07	517.317	C26H48NO7P	[M+H]+	-	-	LysoPC 18:3(2n isomer)	Lipids	LPC	-	1	-	2731500	2520200	2557900	4650400	3950800	4160300	1712000	1621500	1675300	--	--
pmb0854	UPLC-MS/MS	Positive	518.32	184.07	517.317	C26H48NO7P	[M+H]+	-	-	LysoPC 18:3	Lipids	LPC	-	1	-	2465500	2359000	2609300	4528300	3725500	3872300	1660600	1623500	1652200	--	--
Hmbn002692	UPLC-MS/MS	Negative	517.16	175.04	518.164	C22H30O14	[M-H]-	-	-	6'-O-Feruloyl-D-sucrose	Phenolic acids	Phenolic acids	118230-77-6	3	-	94633	82776	96872	166980	129420	151090	148490	128220	142340	--	--
pmp001273	UPLC-MS/MS	Positive	520.34	184.07	519.332	C26H50NO7P	[M+H]+	-	-	LysoPC 18:2	Lipids	LPC	-	1	-	6726900	6153900	6292700	10491000	8193400	8486500	4707700	4342000	5125300	--	--
pmp001251	UPLC-MS/MS	Positive	520.34	184.07	519.332	C26H50NO7P	[M+H]+	-	-	LysoPC 18:2(2n isomer)	Lipids	LPC	-	1	-	6242700	6187400	6696700	10229000	9010900	8567300	4836100	4543300	5285100	--	--
pmn001644	UPLC-MS/MS	Negative	519.08	300	520.085	C23H20O14	[M-H]-	-	-	Quercetin-3-O-(2''-acetyl)glucuronide	Flavonoids	Flavonols	-	2	-	74514	97196	75739	148420	135900	153530	25783	26981	18014	--	--
Li512111	UPLC-MS/MS	Negative	519.11	315.05	520.122	C24H24O13	[M-H]-	-	-	Isorhamnetin-3-O-(6''-acetylglucoside)	Flavonoids	Flavonols	-	3	-	142470	149200	143030	263740	184030	226700	100080	101460	118270	--	--
pmp000703	UPLC-MS/MS	Positive	538.15	197.08	520.152	C22H32O14	[M+NH4]+	-	-	6'-O-D-Glucosylsweroside	Terpenoids	Sesquiterpenoids	-	3	-	65820	100220	91874	82512	70518	75724	161290	156520	112140	--	--
Lmsp003655	UPLC-MS/MS	Positive	521.2	131.05	520.194	C26H32O11	[M+H]+	-	-	Dehydrodiconiferyl alcohol-gamma'-O-glucoside	Phenolic acids	Phenolic acids	-	3	-	210310	235970	238360	114490	107870	104820	445070	418410	415480	--	--
Cmsp003083	UPLC-MS/MS	Positive	521.2	131.05	520.194	C26H32O11	[M+H]+	-	-	Dehydrodiconiferyl alcohol-4-O-glucoside	Others	Others	107870-88-2	3	-	219700	191010	210270	91586	100970	94354	412430	354500	378970	--	--
pmp001281	UPLC-MS/MS	Positive	522.36	184.07	521.348	C26H52NO7P	[M+H]+	-	-	LysoPC 18:1	Lipids	LPC	-	1	-	438940	452840	434920	647770	488160	416380	309460	214570	412850	--	--
Lmhp010190	UPLC-MS/MS	Positive	522.36	184.07	521.348	C26H52NO7P	[M+H]+	-	-	LysoPC 18:1(2n isomer)	Lipids	LPC	-	1	-	470620	446260	461100	630960	494550	422740	321330	229560	394130	--	--
pmb3041	UPLC-MS/MS	Negative	521.09	329.2	522.101	C23H22O14	[M-H]-	-	-	Tricin-7-O-saccharic acid	Flavonoids	Flavonoid	-	3	-	95570	107300	89144	57716	63188	53500	146850	92728	132860	--	--
pmp001128	UPLC-MS/MS	Positive	523.14	463.12	522.131	C31H22O8	[M+H]+	-	-	Denthyrsinone	Others	Others	-	3	-	5163.4	4020	6545.4	9	9	9	7810.9	12889	5695.2	--	--
pmn001710	UPLC-MS/MS	Negative	521.13	359.08	522.137	C24H26O13	[M-H]-	-	-	Rosmarinic acid-3'-O-glucoside	Phenolic acids	Phenolic acids	910028-78-3	2	-	49268	56350	39368	34604	22661	38086	46649	37573	68062	--	--
Lmyn003971	UPLC-MS/MS	Negative	521.2	359.15	522.21	C26H34O11	[M-H]-	-	-	Dihydrodehydrodiconiferyl alcohol-4-O-β-D-glucopyranoside	Lignans and Coumarins	Lignans	-	3	-	42968	23524	37620	56236	24542	50303	68508	60300	38952	--	--
Lmmn002274	UPLC-MS/MS	Negative	521.2	359.15	522.21	C26H34O11	[M-H]-	-	-	Isolariciresinol-9'-O-glucoside	Lignans and Coumarins	Lignans	63358-12-3	3	-	65801	34586	48414	46687	55887	21408	42856	46928	40862	--	--
Hmln003754	UPLC-MS/MS	Negative	521.2	359.15	522.21	C26H34O11	[M-H]-	-	-	Icariside E5	Others	Others	126176-79-2	3	-	54787	26978	38467	41795	65120	36010	58669	88482	51904	--	--
Cmsp005051	UPLC-MS/MS	Positive	523.23	137.06	522.21	C26H34O11	[M+H]+	-	-	Isolariciresinol-9-O-glucoside	Lignans and Coumarins	Lignans	-	3	-	97437	99327	48649	18561	47944	34315	104070	81528	106220	--	--
HJN083	UPLC-MS/MS	Negative	521.2	359.15	522.211	C26H34O11	[M-H]-	-	-	Lariciresinol-4'-O-glucoside	Lignans and Coumarins	Lignans	143663-00-7	3	-	52477	62025	35733	49635	26636	43464	79348	46062	44263	--	--
pmd0136	UPLC-MS/MS	Positive	524.37	184.07	523.364	C26H54NO7P	[M+H]+	-	-	LysoPC 18:0(2n isomer)	Lipids	LPC	-	1	-	79667	81664	90415	79531	91959	63585	29998	20029	49311	--	--
mws0126	UPLC-MS/MS	Positive	524.37	184.07	523.364	C26H54NO7P	[M+H]+	-	-	LysoPC 18:0	Lipids	LPC	19420-57-6	1	-	1615400	1552400	1615600	924180	1246200	888450	349680	172690	779630	--	--
Lmtn003096	UPLC-MS/MS	Negative	523.21	361.14	524.226	C26H36O11	[M-H]-	-	-	Secoisolariciresinol 4-O-glucoside	Lignans and Coumarins	Lignans	-	3	-	1968000	2052500	2117600	1925400	1728900	1861500	2636000	2346300	2991000	--	--
pmb0743	UPLC-MS/MS	Positive	527.15	347.7	526.148	C27H26O11	[M+H]+	-	-	Tricin-7-O-guaiacylglycerol	Flavonoids	Flavonoid	-	3	-	3024.3	4128.1	4192.1	2632.9	2571.3	3596.7	2191.2	2053.4	9	--	--
Lmhn003801	UPLC-MS/MS	Negative	531.12	337.06	532.122	C25H24O13	[M-H]-	-	-	Feruloylsinapoyltartaric acid	Phenolic acids	Phenolic acids	-	3	-	19359	21347	18499	23152	14753	26859	20717	16491	18236	--	--
Lmhp007840	UPLC-MS/MS	Positive	534.36	184.07	533.348	C27H52NO7P	[M+H]+	-	-	LysoPC 19:2	Lipids	LPC	-	3	-	7307.2	6127.8	5060.5	13405	9005.9	8685	8595.5	5831.3	3089.7	--	--
Lmmp003817	UPLC-MS/MS	Positive	535.11	287.05	534.101	C24H22O14	[M+H]+	-	-	Kaempferol-3-O-(6''-malonyl)glucoside	Flavonoids	Flavonols	-	2	-	190230	211100	188080	336250	307890	278340	125380	95008	118480	--	--
pmp001110	UPLC-MS/MS	Positive	535.14	517.13	534.137	C25H26O13	[M+H]+	-	-	Apigenin-6-C-xyloside-8-C-arabinoside*	Flavonoids	Flavonoid carbonoside	-	1	-	6970600	7722000	7400600	10405000	10687000	9290100	1985700	1882300	2527900	--	--
Lmtp002942	UPLC-MS/MS	Positive	535.14	499.12	534.137	C25H26O13	[M+H]+	-	-	Apigenin-6,8-di-C-arabinoside*	Flavonoids	Flavonoid carbonoside	-	1	-	22742000	20007000	22126000	26812000	27722000	28789000	9370000	8965600	7032900	--	--
Lmtp002822	UPLC-MS/MS	Positive	535.14	499.12	534.137	C25H26O13	[M+H]+	-	-	Apigenin-6-C-arabinoside-8-C-xyloside*	Flavonoids	Flavonoid carbonoside	-	1	-	453580	349570	336410	588000	585070	653910	129470	150120	152910	--	--
Lmhp010908	UPLC-MS/MS	Positive	536.37	184.07	535.364	C27H54NO7P	[M+H]+	-	-	LysoPC 19:1	Lipids	LPC	-	3	-	19339	17416	20427	15022	13742	12723	11083	5534.5	15231	--	--
Zmfn000481	UPLC-MS/MS	Negative	535.04	323.03	536.044	C14H22N2O16P2	[M-H]-	-	-	Uridine-5'-Diphosphate-D-Xylose	Nucleotides and derivatives	Nucleotides and derivatives	3616-06-6	2	-	321210	342360	339490	284730	333900	335730	372050	268750	351310	C00190	ko00520,ko00908,ko01100
Lmdn001925	UPLC-MS/MS	Negative	537.2	375.15	538.205	C26H34O12	[M-H]-	-	-	Olivil-4'-O-glucoside	Lignans and Coumarins	Lignans	76880-93-8	3	-	61158	27504	33588	25252	29301	22874	73427	63762	64395	--	--
Lmhp008742	UPLC-MS/MS	Positive	542.32	184.07	541.317	C28H48NO7P	[M+H]+	-	-	LysoPC 20:5	Lipids	LPC	162440-04-2	2	-	5654.1	5951.1	7863.9	9023.5	16284	10939	9	1292.5	1729.2	--	--
pmc0960	UPLC-MS/MS	Positive	544.34	184.07	543.332	C28H50NO7P	[M+H]+	-	-	LysoPC 20:4	Lipids	LPC	-	2	-	5718.9	6350.4	6450.7	7953.3	9705	7251.5	3114.2	4990.9	3944.2	--	--
pmp001130	UPLC-MS/MS	Positive	545.22	421.16	544.21	C32H32O8	[M+H]+	-	-	Dendromoniliside E	Terpenoids	Sesquiterpenoids	-	3	-	13713	15440	15671	9	9	9	25575	29439	26564	--	--
Lmhp009890	UPLC-MS/MS	Positive	546.36	184.07	545.348	C28H52NO7P	[M+H]+	-	-	LysoPC 20:3	Lipids	LPC	1199257-41-4	3	-	21455	22826	24464	32623	30253	27607	14669	13547	18793	--	--
pmd0147	UPLC-MS/MS	Positive	548.37	184.07	547.364	C28H54NO7P	[M+H]+	-	-	LysoPC 20:2	Lipids	LPC	-	2	-	74886	67818	75000	78349	71351	56459	44883	29167	69284	--	--
pmb0608	UPLC-MS/MS	Positive	549.12	301.4	548.117	C25H24O14	[M+H]+	-	-	Chrysoeriol-7-O-(6''-malonyl)glucoside	Flavonoids	Flavonoid	-	3	-	15449	16559	19664	13797	16881	13738	20857	24872	24193	--	--
pmn001672	UPLC-MS/MS	Negative	547.17	223.1	548.174	C23H32O15	[M-H]-	-	-	Furanofructosyl-α-D-(3-mustard acyl)glucoside	Phenolic acids	Phenolic acids	-	2	-	481630	635290	710300	133640	136040	152490	811510	1500100	1029500	--	--
Lmsn003628	UPLC-MS/MS	Negative	547.17	223.06	548.174	C23H32O15	[M-H]-	-	-	6′-O-Sinapoylsucrose	Phenolic acids	Phenolic acids	-	2	-	495460	495520	529830	117470	131090	114950	1355500	1137700	1167400	--	--
Lmhp011549	UPLC-MS/MS	Positive	550.39	184.07	549.379	C28H56NO7P	[M+H]+	-	-	LysoPC 20:1	Lipids	LPC	-	3	-	12532	9591.3	12215	8126.5	7430.8	6276.1	5903.3	3416.6	12366	--	--
pmp000589	UPLC-MS/MS	Positive	551.1	303.05	550.096	C24H22O15	[M+H]+	-	-	Quercetin-7-O-(6''-malonyl)glucoside	Flavonoids	Flavonols	-	1	-	128510	155050	152690	127060	142460	161960	90822	120470	110530	--	--
Hmln002321	UPLC-MS/MS	Negative	549.09	300	550.096	C24H22O15	[M-H]-	-	-	Quercetin-3-O-(6''-malonyl)glucoside	Flavonoids	Flavonols	-	2	-	6866.3	11107	5556	8753.6	10654	16132	2276.1	3549.8	3380.9	C12638	ko00944
Hmln002189	UPLC-MS/MS	Negative	549.09	505.11	550.096	C24H22O15	[M-H]-	-	-	Quercetin-3-O-(6''-malonyl)galactoside	Flavonoids	Flavonols	-	2	-	1614400	1477200	1391100	1830100	1596800	1870300	1770200	1821900	1638900	--	--
pmb2979	UPLC-MS/MS	Negative	549.12	387.1	550.132	C25H26O14	[M-H]-	-	-	Hesperetin-7-O-(6''-malonyl)glucoside	Flavonoids	Dihydroflavonol	-	3	-	48498	66083	76351	46756	45006	47566	66022	52198	50889	--	--
HJAP010	UPLC-MS/MS	Positive	551.14	497.1	550.132	C25H26O14	[M+H]+	-	-	Luteolin-6,8-di-C-arabinoside	Flavonoids	Flavonoid carbonoside	-	2	-	146690	166890	217920	504250	442910	651630	45224	57431	92705	--	--
pmd0143	UPLC-MS/MS	Positive	552.4	184.07	551.395	C28H58NO7P	[M+H]+	-	-	LysoPC 20:0	Lipids	LPC	108341-80-6	2	-	3883.6	2956.3	3175.4	3446.8	9158.7	1307.8	464.56	9	9	--	--
Lmmn002260	UPLC-MS/MS	Negative	551.21	389.17	552.221	C27H36O12	[M-H]-	-	-	5'-Methoxyisolariciresinol-9'-O-glucoside	Lignans and Coumarins	Lignans	-	2	-	144120	242550	183800	245970	223770	233930	86996	72630	34305	--	--
pma0702	UPLC-MS/MS	Positive	558.28	207.07	557.274	C29H39N3O8	[M+H]+	-	-	N1,N8-Bis(sinapoyl)spermidine	Alkaloids	Phenolamine	-	2	-	33885	61740	39571	21875	17574	37602	86537	69361	63559	C21170	--
HJAP064	UPLC-MS/MS	Positive	565.12	317.08	564.088	C25H24O15	[M+H]+	-	-	Isorhamnetin-3-O-(6''-malonylglucoside)	Flavonoids	Flavonoid	-	2	-	748700	746530	824760	1209200	1055800	1222100	456890	503580	382510	--	--
mws1660	UPLC-MS/MS	Positive	565.16	529.13	564.123	C26H28O14	[M+H]+	-	-	Schaftoside	Flavonoids	Flavonoid carbonoside	51938-32-0	1	-	82383	125110	83617	122990	108740	95421	69354	73970	104320	C10181	--
mws1292	UPLC-MS/MS	Positive	565.16	409.09	564.123	C26H28O14	[M+H]+	-	-	Isoschaftoside	Flavonoids	Flavonoid carbonoside	52012-29-0	2	-	12947000	6625400	12682000	13875000	12815000	17486000	10594000	10421000	6910400	--	--
pmp000411	UPLC-MS/MS	Positive	565.16	433.1	564.148	C26H28O14	[M+H]+	-	-	Genistein-8-C-apiosyl(1→6)glucoside	Flavonoids	Isoflavones	-	2	-	3550500	3865200	3130900	1492500	1271900	1635100	10503000	9499500	9297900	--	--
pmp000236	UPLC-MS/MS	Positive	565.16	367.1	564.148	C26H28O14	[M+H]+	-	-	Isovitexin-8-O-xylcoside	Flavonoids	Flavonoid carbonoside	-	2	-	2222700	2389400	2354100	1357000	978370	1268900	2898400	4036200	4455400	--	--
pmb0571	UPLC-MS/MS	Positive	565.16	271.6	564.148	C26H28O14	[M+H]+	-	-	Apigenin-7-O-(2''-glucosyl)arabinoside	Flavonoids	Flavonoid	-	3	-	440030	377090	397270	9	5105.2	9	997520	834410	780170	--	--
Lmtp002642	UPLC-MS/MS	Positive	565.16	457.11	564.148	C26H28O14	[M+H]+	-	-	Apigenin-8-C-(2''-glucosyl)arabinoside	Flavonoids	Flavonoid carbonoside	-	3	-	15370000	15927000	17353000	18887000	14565000	14657000	18376000	19239000	21218000	--	--
Lmtp002474	UPLC-MS/MS	Positive	565.16	427.1	564.148	C26H28O14	[M+H]+	-	-	Apigenin-6-C-(2''-glucosyl)arabinoside	Flavonoids	Flavonoid carbonoside	-	1	-	131160	172340	145100	201430	208860	211030	129300	90919	133360	--	--
Lmnp102580	UPLC-MS/MS	Positive	565.16	433.11	564.148	C26H28O14	[M+H]+	-	-	Apigenin-6-C-(2''-xylosyl)glucoside	Flavonoids	Flavonoid carbonoside	-	3	-	3368400	3789000	3394000	9	9	9	9976900	10705000	8884600	--	--
Lmnp003080	UPLC-MS/MS	Positive	565.16	433.11	564.148	C26H28O14	[M+H]+	-	-	Hispidulin-8-C-(2''-O-xylosyl)xyloside	Flavonoids	Flavonoid carbonoside	-	3	-	60531	69195	35418	9	8267.8	9	145230	159110	107830	--	--
pmb2922	UPLC-MS/MS	Negative	565.05	323.1	566.055	C15H24N2O17P2	[M-H]-	-	-	Uridine 5'-diphospho-D-glucose	Nucleotides and derivatives	Nucleotides and derivatives	133-89-1	1	-	3125400	3280400	3561100	2999000	3698400	3237600	3015500	2711900	3461400	C00029	ko00040,ko00052,ko00053,ko00240,ko00500,ko00520,ko00561,ko00908,ko01100,ko01110
Zmxp005470	UPLC-MS/MS	Positive	579.13	331.08	578.127	C26H26O15	[M+H]+	-	-	Tricin-7-O-(6''-O-malonyl)glucoside	Flavonoids	Flavonoid	-	3	-	170040	158230	176710	209050	199180	225630	160890	150540	153220	--	--
pmp000237	UPLC-MS/MS	Positive	579.13	283.06	578.127	C26H26O15	[M+H]+	-	-	Apigenin-6-C-(2''-glucuronyl)xyloside	Flavonoids	Flavonoid carbonoside	-	2	-	743260	874490	876260	63819	53117	50753	3039500	2796000	2885700	--	--
pmb0720	UPLC-MS/MS	Positive	579.13	331.08	578.127	C26H26O15	[M+H]+	-	-	Tricin-7-O-(6''-Malonyl)Glucoside	Flavonoids	Flavonoid	-	3	-	25351	23546	24534	26561	22644	23776	45912	47547	49638	--	--
pme3227	UPLC-MS/MS	Positive	579.17	433	578.164	C27H30O14	[M+H]+	-	-	Vitexin-2''-O-rhamnoside	Flavonoids	Flavonoid carbonoside	64820-99-1	2	-	3029100	2740600	2938300	123460	151280	131910	7938500	7469800	7833800	C12628	ko00944
pme0368	UPLC-MS/MS	Positive	579.17	271.01	578.164	C27H30O14	[M+H]+	-	-	Apigenin-7-O-rutinoside (Isorhoifolin)	Flavonoids	Flavonoid	552-57-8	2	-	21243	35108	14604	10842	17182	13064	42667	42030	22208	--	--
mws0047	UPLC-MS/MS	Positive	579.17	271.07	578.164	C27H30O14	[M+H]+	-	-	Apigenin-7-O-neohesperidoside (Rhoifolin)	Flavonoids	Flavonoid	17306-46-6	3	-	265640	287170	305410	285970	276840	359100	218660	284680	220410	C12627	ko00944
Lmyp004963	UPLC-MS/MS	Positive	579.17	415.11	578.164	C27H30O14	[M+H]+	-	-	Apigenin-6-C-(2''-rhamnosyl)glucoside	Flavonoids	Flavonoid carbonoside	-	2	-	207160	230750	233920	562490	513220	491730	9	9	9	--	--
Lmyp004081	UPLC-MS/MS	Positive	579.17	313.07	578.164	C27H30O14	[M+H]+	-	-	Isovitexin-2''-O-rhamnoside	Flavonoids	Flavonoid carbonoside	-	3	-	986870	1122800	972940	92089	79979	77341	3591200	3560900	3710800	--	--
HJAP148	UPLC-MS/MS	Positive	581.15	287.06	580.142	C26H28O15	[M+H]+	-	-	Kaempferol-3-O-sambubioside	Flavonoids	Flavonoid	27661-51-4	2	-	216690	205000	261060	9	9	9	628740	572340	520240	--	--
pmp000238	UPLC-MS/MS	Positive	581.15	383.07	580.143	C26H28O15	[M+H]+	-	-	Luteolin-6-C-arabinoside-7-O-glucoside	Flavonoids	Flavonoid carbonoside	-	2	-	164030	187940	145070	9	9	9	261750	281350	217650	--	--
pmb0636	UPLC-MS/MS	Positive	581.15	431.3	580.143	C26H28O15	[M+H]+	-	-	Orientin-7-O-arabinoside	Flavonoids	Flavonoid carbonoside	-	3	-	650560	745170	636390	914350	851120	778950	469310	536260	621300	--	--
pmb0631	UPLC-MS/MS	Positive	581.15	515.4	580.143	C26H28O15	[M+H]+	-	-	Orientin-6-C-arabinoside	Flavonoids	Flavonoid carbonoside	-	3	-	1690800	1645600	1520500	1800600	1751800	2053300	1498100	1586300	1604300	--	--
pmb0566	UPLC-MS/MS	Positive	581.15	383.2	580.143	C26H28O15	[M+H]+	-	-	Luteolin-7-O-glucoside-5-O-arabinoside	Flavonoids	Flavonoid	-	2	-	478070	363150	499110	11828	21426	16104	1448100	1187100	1098400	--	--
mws1066	UPLC-MS/MS	Negative	579.17	271	580.179	C27H32O14	[M-H]-	-	-	Naringenin-7-O-Rutinoside(Narirutin)*	Flavonoids	Dihydroflavone	14259-46-2	2	-	117100	101360	132150	215340	209030	208000	53164	77574	83799	C09793	--
mws0046	UPLC-MS/MS	Negative	579.17	271.06	580.179	C27H32O14	[M-H]-	-	-	Naringenin-7-O-Neohesperidoside(Naringin)*	Flavonoids	Dihydroflavone	10236-47-2	3	-	178260	173350	222180	348680	283680	345320	122740	113350	90487	C09789	ko00941
Zmhn001446	UPLC-MS/MS	Negative	579.21	417.16	580.216	C28H36O13	[M-H]-	-	-	syringaresinol-4'-O-glucopyranosid	Lignans and Coumarins	Lignans	-	1	-	5118900	5698500	4742300	2871300	2406100	2794000	8098300	8181100	9139000	--	--
Lmqn001932	UPLC-MS/MS	Negative	579.21	417.16	580.216	C28H36O13	[M-H]-	-	-	Syringaresinol-4'-O-glucoside	Lignans and Coumarins	Lignans	7374-79-0	2	-	128740	131710	67694	83800	109450	115840	169680	148480	104730	C10890	--
Zmjp004928	UPLC-MS/MS	Positive	583.15	463.1	582.137	C29H26O13	[M+H]+	-	-	Vanillyl-O-Vitexin	Flavonoids	Flavonoid	-	3	-	17607	21504	19209	21423	16971	17111	11550	16108	17601	--	--
pmb0492	UPLC-MS/MS	Positive	584.28	325	583.268	C34H37N3O6	[M+H]+	-	-	N',N'',N'''-p-Coumaroyl-cinnamoyl-caffeoyl spermidine	Alkaloids	Phenolamine	-	3	-	808720	596240	736630	830430	681950	818550	746610	722510	647040	--	--
pmb2936	UPLC-MS/MS	Negative	591.17	367.2	592.179	C28H32O14	[M-H]-	-	-	Disinapoyl glucoside	Phenolic acids	Phenolic acids	-	3	-	17768	20932	15448	13231	7635	10338	35864	30787	36118	--	--
Rfmb056	UPLC-MS/MS	Negative	591.21	387.14	592.216	C29H36O13	[M-H]-	-	-	Medioresinol-4'-O-(6'''-acetyl)glucoside	Lignans and Coumarins	Lignans	-	3	-	12040	11514	12054	9	9	9	26942	31438	25636	--	--
pmp000239	UPLC-MS/MS	Positive	595.13	505.09	594.122	C26H26O16	[M+H]+	-	-	Luteolin-6-C-(5''-glucuronyl)xyloside	Flavonoids	Flavonoid	-	2	-	1117900	1135500	1018800	1803100	1748300	1864400	638050	975430	868890	--	--
mws1290	UPLC-MS/MS	Negative	593.13	285	594.137	C30H26O13	[M-H]-	-	-	Kaempferol-3-O-(6''-p-Coumaroyl)glucoside (Tiliroside)	Flavonoids	Flavonols	20316-62-5	2	-	43248	46530	50436	77139	67515	70729	31095	42920	41926	C17140	--
Zmjp003291	UPLC-MS/MS	Positive	595.17	433.12	594.158	C27H30O15	[M+H]+	-	-	Vitexin-2"-O-galactoside	Flavonoids	Flavonoid	-	1	-	2727800	2511600	1945300	102760	86806	119800	3892000	4277500	3698400	--	--
pmp001106	UPLC-MS/MS	Positive	595.17	577.16	594.158	C27H30O15	[M+H]+	-	-	Vitexin-2''-O-glucoside	Flavonoids	Flavonoid carbonoside	61360-94-9	1	-	10282000	9808400	10867000	10036000	9718100	10917000	11302000	12930000	13128000	C04024	ko00944
pmp000593	UPLC-MS/MS	Positive	595.17	449.1	594.158	C27H30O15	[M+H]+	-	-	Luteolin-7-O-rutinoside*	Flavonoids	Flavonoid	3563-98-2	3	-	20470000	21092000	19483000	19511000	17974000	20196000	22261000	23458000	21954000	--	--
pme1665	UPLC-MS/MS	Negative	593.15	311	594.158	C27H30O15	[M-H]-	-	-	Isovitexin-7-O-glucoside(Saponarin)	Flavonoids	Flavonoid carbonoside	20310-89-8	1	-	562540	542140	565340	487180	537440	560280	624850	590010	654350	C08064	--
pme1605	UPLC-MS/MS	Negative	593.15	285	594.158	C27H30O15	[M-H]-	-	-	Kaempferol-3-O-robinobioside(Biorobin)	Flavonoids	Flavonols	17297-56-2	1	-	1266200	1101700	950620	1033000	1115000	1321000	1194500	1086800	1244500	--	--
MWSslk254	UPLC-MS/MS	Positive	595.17	287.06	594.158	C27H30O15	[M+H]+	-	-	Kaempferol-3-O-glucorhamnoside	Flavonoids	Flavonoid carbonoside	40437-72-7	1	-	1453400	1300000	1392600	1390500	1557800	1457400	1790100	1975000	1575300	--	--
MWSslk146	UPLC-MS/MS	Positive	595.17	433.12	594.158	C27H30O15	[M+H]+	-	-	4'-O-Glucosylvitexin	Flavonoids	Flavonoid	38950-94-6	2	-	2482200	2638900	2561100	94307	121260	142720	4221500	4890900	4913700	--	--
MWSHY0080	UPLC-MS/MS	Positive	595.17	287.06	594.158	C27H30O15	[M+H]+	-	-	Luteolin-7-O-neohesperidoside (Lonicerin)	Flavonoids	Flavonoid	25694-72-8	1	-	1463300	1416000	1536900	1553600	1303900	1428700	1589700	1743200	1652000	C12630	ko00944
MWSHY0061	UPLC-MS/MS	Positive	595.16	287.06	594.158	C27H30O15	[M+H]+	-	-	Kaempferol-3-O-neohesperidoside	Flavonoids	Flavonoid	32602-81-6	1	-	1483800	1637800	1599200	1817200	1412100	1451200	1412400	1671700	1802200	--	--
mws1073	UPLC-MS/MS	Positive	595.17	457.2	594.158	C27H30O15	[M+H]+	-	-	Apigenin-6,8-di-C-glucoside (Vicenin-2)	Flavonoids	Flavonoid	23666-13-9	1	-	18572000	18656000	17652000	20014000	18660000	20551000	22244000	21904000	23763000	C10195	--
Lmsp004670	UPLC-MS/MS	Positive	595.17	287.06	594.158	C27H30O15	[M+H]+	-	-	Kaempferol-3-O-glucoside-7-O-rhamnoside	Flavonoids	Flavonols	-	1	-	1368800	1412800	1578500	1508900	1552000	1572900	1677900	1929600	1658700	--	--
Lmsn002815	UPLC-MS/MS	Negative	593.15	285.04	594.158	C27H30O15	[M-H]-	-	-	Kaempferol-3-O-rutinoside(Nicotiflorin)*	Flavonoids	Flavonoid	17650-84-9	1	-	14337000	14380000	13677000	13069000	14338000	14868000	18085000	14041000	16727000	C21833	ko00944,ko01110
Lmnp202682	UPLC-MS/MS	Positive	595.17	463.13	594.158	C27H30O15	[M+H]+	-	-	5,7,4'-Trihydroxy-8-methoxyflavone-6-C-[Xylosyl-(1-2)]-glucoside	Flavonoids	Flavonoid carbonoside	-	3	-	92823	86571	56556	43965	33878	30208	188530	118860	131420	--	--
Lmnp102682	UPLC-MS/MS	Positive	595.17	463.13	594.158	C27H30O15	[M+H]+	-	-	Hispidulin-8-C-(2''-O-xylosyl)glucoside	Flavonoids	Flavonoid carbonoside	-	3	-	70008	53416	81827	35581	48094	37151	193070	155200	136300	--	--
Lmlp002990	UPLC-MS/MS	Positive	595.17	313.07	594.158	C27H30O15	[M+H]+	-	-	Isosaponarin(Isovitexin-4'-O-glucoside)	Flavonoids	Flavonoid carbonoside	19416-87-6	2	-	169760	215550	316770	9	3978.5	9	792390	955900	842740	--	--
Lmgp004152	UPLC-MS/MS	Positive	595.17	445.11	594.158	C27H30O15	[M+H]+	-	-	Diosmetin-8-C-(2''-O-arabinosyl)glucoside	Flavonoids	Flavonoid carbonoside	-	3	-	32848	43830	60826	32612	37409	15736	111990	87062	102400	--	--
Lmqn000780	UPLC-MS/MS	Negative	606.08	384.98	607.082	C17H27N3O17P2	[M-H]-	-	-	Uridine 5'-diphospho-N-acetylglucosamine	Alkaloids	Alkaloids	528-04-1	2	-	60624	61532	61209	77223	77002	71354	49914	48229	58387	C00043	ko00520,ko01100
mws1661	UPLC-MS/MS	Positive	609.18	301	608.174	C28H32O15	[M+H]+	-	-	Diosmetin-7-O-rutinoside (Diosmin)	Flavonoids	Flavonoid	520-27-4	3	-	20594	16194	18015	9	9	9	21449	23328	23959	C10039	--
Lmgp004217	UPLC-MS/MS	Positive	609.18	445.11	608.174	C28H32O15	[M+H]+	-	-	Diosmetin-8-C-(2''-O-rhamnosyl)glucoside	Flavonoids	Flavonoid carbonoside	98891-92-0	3	-	59537	61258	54446	20294	15138	19628	194650	179440	140730	--	--
Lmmp000897	UPLC-MS/MS	Positive	611.14	287.05	610.132	C30H26O14	[M+H]+	-	-	Gallocatechin-(4α→8)-gallocatechin	Flavonoids	Flavanols	-	2	-	174060	182290	229010	9	9	9	347500	299150	354420	--	--
Zmjp003031	UPLC-MS/MS	Positive	611.16	449.11	610.153	C27H30O16	[M+H]+	-	-	Orientin-2''-O-galactoside	Flavonoids	Flavonoid	-	1	-	9308100	9167200	9371500	9	9	9	18824000	15376000	16665000	--	--
Zmhp002409	UPLC-MS/MS	Positive	611.16	491.12	610.153	C27H30O16	[M+H]+	-	-	Isoluteolin-6,8-di-C-glucoside	Flavonoids	Flavonoid	-	3	-	226060	184570	193510	9	9	9	369540	455790	367240	--	--
pmp000126	UPLC-MS/MS	Positive	611.16	593.2	610.153	C27H30O16	[M+H]+	-	-	Luteolin-6,8-di-C-glucoside*	Flavonoids	Flavonoid carbonoside	29428-58-8	1	-	8189500	7984000	8540300	10768000	10781000	10213000	9181500	8011700	8753000	C10102	--
pmn001583	UPLC-MS/MS	Negative	609.15	300	610.153	C27H30O16	[M-H]-	-	-	Quercetin-3-O-robinobioside	Flavonoids	Flavonols	52525-35-6	1	-	3678400	3141900	3358000	3537300	4362900	4108000	3279700	3123100	3449000	--	--
pmb0711	UPLC-MS/MS	Positive	611.16	303.1	610.153	C27H30O16	[M+H]+	-	-	Quercetin-7-O-rutinoside	Flavonoids	Flavonols	147714-62-3	3	-	12084000	11548000	10896000	12774000	11868000	12545000	11812000	12027000	11225000	--	--
pmb0665	UPLC-MS/MS	Positive	611.16	465.1	610.153	C27H30O16	[M+H]+	-	-	Orientin-7-O-glucoside	Flavonoids	Flavonoid carbonoside	-	2	-	16519000	17545000	17083000	18697000	19817000	18690000	16932000	16974000	16245000	--	--
pmb0624	UPLC-MS/MS	Positive	611.16	431.3	610.153	C27H30O16	[M+H]+	-	-	Isoorientin-7-O-glucoside	Flavonoids	Flavonoid carbonoside	-	2	-	90303	77940	50761	120250	102540	136980	57067	70194	83716	--	--
mws0059	UPLC-MS/MS	Negative	609.15	301	610.153	C27H30O16	[M-H]-	-	-	Quercetin-3-O-rutinoside (Rutin)	Flavonoids	Flavonols	153-18-4	1	-	4179600	4699900	3741000	4100400	5426400	4275300	4838300	4171000	4025400	C05625	ko00944,ko01100,ko01110
Lmsp004166	UPLC-MS/MS	Positive	611.16	303.05	610.153	C27H30O16	[M+H]+	-	-	Quercetin-3-O-glucoside-7-O-rhamnoside	Flavonoids	Flavonols	-	1	-	11091000	10244000	10477000	12283000	11546000	11885000	11949000	10927000	10330000	--	--
Lmmp003091	UPLC-MS/MS	Positive	611.16	303.05	610.153	C27H30O16	[M+H]+	-	-	Quercetin-3-O-(4''-O-glucosyl)rhamnoside	Flavonoids	Flavonols	59262-54-3	2	-	9264200	10525000	10270000	11612000	10964000	11196000	10475000	11175000	10476000	C17563	--
Lmjp002461	UPLC-MS/MS	Positive	611.16	303.05	610.153	C27H30O16	[M+H]+	-	-	Quercetin-3-O-neohesperidoside	Flavonoids	Flavonols	117611-67-3	1	-	11002000	10354000	10338000	11668000	10718000	11384000	12308000	13025000	12202000	--	--
Lmbp002592	UPLC-MS/MS	Positive	611.16	287.05	610.153	C27H30O16	[M+H]+	-	-	Kaempferol-3,7-di-O-glucoside	Flavonoids	Flavonoid	-	1	-	853720	842680	770210	9	9	9	2180800	1901500	1832400	--	--
Lmbp002336	UPLC-MS/MS	Positive	611.16	303.05	610.153	C27H30O16	[M+H]+	-	-	Quercetin-3-O-(2''-O-rhamnosyl)galactoside	Flavonoids	Flavonols	-	3	-	3912600	4024500	3855500	6635600	5979300	6149000	1566900	1679900	1531300	--	--
Hmpp002612	UPLC-MS/MS	Positive	611.16	287.05	610.153	C27H30O16	[M+H]+	-	-	Luteolin-7-O-gentiobioside	Flavonoids	Flavonoid	-	2	-	788720	912940	839850	44914	41940	27278	2186900	1829900	1775900	--	--
HJAP024	UPLC-MS/MS	Positive	611.16	593.15	610.154	C27H30O16	[M+H]+	-	-	Kaempferol-6,8-di-C-glucoside*	Flavonoids	Flavonoid	-	3	-	2641700	3652300	3283200	3818400	3961000	4055400	3540700	3034200	3495100	--	--
pme0001	UPLC-MS/MS	Negative	609.18	301	610.19	C28H34O15	[M-H]-	-	-	Hesperetin-7-O-neohesperidoside(Neohesperidin)*	Flavonoids	Dihydroflavone	13241-33-3	1	-	1900900	1737400	1989500	2006500	1704000	1697400	1977400	2759200	3256100	C09806	ko00941
mws0036	UPLC-MS/MS	Negative	609.18	301.09	610.19	C28H34O15	[M-H]-	-	-	Hesperetin-7-O-rutinoside (Hesperidin)*	Flavonoids	Dihydroflavone	520-26-3	2	-	708610	725800	356550	653860	550780	615340	1038800	839960	947840	C09755	--
mws4134	UPLC-MS/MS	Negative	611.14	306.08	612.152	C20H32N6O12S2	[M-H]-	-	-	Oxiglutatione	Amino acids and derivatives	Amino acids and derivatives	27025-41-8	1	-	540260	585370	489360	750980	657090	822860	978300	1142800	896760	C00127	ko00480,ko01100
Rfmb26201	UPLC-MS/MS	Negative	621.22	417.16	622.226	C30H38O14	[M-H]-	-	-	Syringaresinol-4'-O-(6''-acetyl)glucoside	Lignans and Coumarins	Lignans	-	1	-	82631	76513	70474	31565	33824	20561	108930	89913	100800	--	--
pmp000241	UPLC-MS/MS	Positive	625.14	505.09	624.133	C27H28O17	[M+H]+	-	-	Luteolin-6-C-(2''-glucuronyl)glucoside	Flavonoids	Flavonoid	-	2	-	1948600	2352700	1965500	2657800	2295800	2539200	1889600	1760500	1752900	--	--
Hmjp002999	UPLC-MS/MS	Positive	625.18	317.06	624.162	C28H32O16	[M+H]+	-	-	Isorhamnetin-3-O-rutinoside (Narcissin)	Flavonoids	Flavonoid	604-80-8	3	-	1576700	1458900	1617200	2662100	2586800	2357900	865650	944740	789080	--	--
Zmxp002867	UPLC-MS/MS	Positive	625.17	301.07	624.168	C28H32O16	[M+H]+	-	-	Chrysoeriol-5,7-di-O-glucoside	Flavonoids	Flavonoid	-	2	-	45786	49987	42936	14002	8865.5	8879.5	141830	154270	148640	--	--
HJN051	UPLC-MS/MS	Negative	623.16	315.05	624.168	C28H32O16	[M-H]-	-	-	Tamarixetin-3-O-rutinoside	Flavonoids	Flavonoid	-	2	-	12971000	13873000	13626000	17547000	18272000	20366000	7184000	7497800	7125200	--	--
HJAP120	UPLC-MS/MS	Positive	625.17	317.07	624.168	C28H32O16	[M+H]+	-	-	Rhamnetin-3-O-Rutinoside	Flavonoids	Flavonoid	-	3	-	1588900	1325600	1740700	2533400	2561700	2619100	878050	789680	760460	--	--
Zmxp004480	UPLC-MS/MS	Positive	625.18	301.07	624.169	C28H32O16	[M+H]+	-	-	Chrysoeriol-7-O-gentiobioside	Flavonoids	Flavonoid	-	2	-	566860	448340	534310	114970	105500	142560	1136300	1171800	1008900	--	--
pmp000127	UPLC-MS/MS	Positive	625.18	607.2	624.169	C28H32O16	[M+H]+	-	-	Chrysoeriol-6,8-di-C-glucoside	Flavonoids	Flavonoid carbonoside	-	1	-	6959200	7435700	7467100	8163100	7304900	10475000	4827600	7198000	5159500	--	--
pmb0623	UPLC-MS/MS	Positive	625.18	607.1	624.169	C28H32O16	[M+H]+	-	-	Chrysoeriol-6-C-glucoside-7-O-glucoside	Flavonoids	Flavonoid carbonoside	-	3	-	5083300	5691100	5214000	8163100	7336700	7930000	5130800	4875900	5420300	--	--
pmb0603	UPLC-MS/MS	Positive	625.18	301.6	624.169	C28H32O16	[M+H]+	-	-	Chrysoeriol-7,4'-di-O-glucoside	Flavonoids	Flavonoid	-	3	-	154010	200490	154860	319110	251940	272710	91402	113970	90136	--	--
MWSHY0064	UPLC-MS/MS	Positive	625.17	317.07	624.169	C28H32O16	[M+H]+	-	-	Isorhamnetin-3-O-neohespeidoside	Flavonoids	Flavonoid	55033-90-4	1	-	1519000	1638800	1530600	3277200	3043700	2668300	799820	984960	935400	--	--
Lmsp004721	UPLC-MS/MS	Positive	625.18	317.07	624.169	C28H32O16	[M+H]+	-	-	Tamarixetin-3-O-glucoside-7-O-rhamnoside	Flavonoids	Flavonoid	-	1	-	1721100	1717100	1531500	2516300	2493200	2893600	877230	951410	674600	--	--
Lmsp004045	UPLC-MS/MS	Positive	625.18	317.07	624.169	C28H32O16	[M+H]+	-	-	Isorhamnetin-3-O-glucoside-7-O-rhamnoside	Flavonoids	Flavonols	-	3	-	236440	194880	203330	263740	221590	241830	181820	202460	201040	--	--
Lmnp002584	UPLC-MS/MS	Positive	625.18	463.13	624.169	C28H32O16	[M+H]+	-	-	Hispidulin-8-C-(2''-O-glucosyl)glucoside	Flavonoids	Flavonoid carbonoside	-	1	-	3277500	2889700	2957400	624890	559410	675860	7920300	7384300	6516300	--	--
Lmmp002963	UPLC-MS/MS	Positive	625.18	317.06	624.169	C28H32O16	[M+H]+	-	-	6-C-Methylquercetin-3-O-rutinoside	Flavonoids	Flavonols	-	3	-	1619700	1652900	1663700	2850200	2549900	2764400	841760	985700	832370	--	--
Lmmp002463	UPLC-MS/MS	Positive	625.18	317.07	624.169	C28H32O16	[M+H]+	-	-	Sexangularetin-3-O-glucoside-7-O-rhamnoside	Flavonoids	Flavonols	-	1	-	1902200	1794600	1926800	2992900	2745900	3019800	924200	861120	971490	--	--
Lmhp003217	UPLC-MS/MS	Positive	625.17	317.06	624.169	C28H32O16	[M+H]+	-	-	2'-Hydoxy,5-methoxyGenistein-O-rhamnosyl-glucoside	Flavonoids	Isoflavones	-	1	-	1630600	1593800	1484300	2491200	2659600	2662700	837690	874700	705700	--	--
HJAP026	UPLC-MS/MS	Positive	625.18	463.13	624.17	C28H32O16	[M+H]+	-	-	Chrysoeriol-6-C-glucoside-4'-O-glucoside	Flavonoids	Flavonoid	-	2	-	2733500	2458600	2945000	714650	581930	609740	8604400	6574200	6853100	--	--
Hmgp001944	UPLC-MS/MS	Positive	625.21	163.03	624.205	C29H36O15	[M+H]+	-	-	Isoacteoside	Phenolic acids	Phenolic acids	61303-13-7	3	-	80167	45442	65481	108260	101880	104390	27878	34578	44989	--	--
Zmhp102730	UPLC-MS/MS	Positive	627.16	303.05	626.148	C27H30O17	[M+H]+	-	-	6-Hydroxykaempferol 3,6-Diglucoside	Flavonoids	Flavonoid	-	1	-	945370	449660	506540	1016600	518890	1249400	330090	321380	294510	--	--
Zmhp002730	UPLC-MS/MS	Positive	627.16	303.05	626.148	C27H30O17	[M+H]+	-	-	6-Hydroxykaempferol 6,7-Diglucoside	Flavonoids	Flavonoid	142674-16-6	2	-	912920	401220	604100	1419000	1119400	1196400	470830	207170	358590	--	--
Zmdp003457	UPLC-MS/MS	Positive	627.16	319.05	626.148	C27H30O17	[M+H]+	-	-	Myricetin-3-O-galactoside-3'-O-rhamnoside*	Flavonoids	Flavonoid	-	1	-	11722000	13870000	12355000	8252100	7248300	8548900	8417300	7208900	10100000	--	--
Zmcp002666	UPLC-MS/MS	Positive	627.14	303.05	626.148	C27H30O17	[M+H]+	-	-	Quercetin3,7-diglucoside	Flavonoids	Flavonoid	-	1	-	110320	147290	123110	316040	221390	198090	139160	177460	167440	--	--
pmp001311	UPLC-MS/MS	Positive	627.16	303.1	626.148	C27H30O17	[M+H]+	-	-	6-Hydroxykaempferol-7,6-O-Diglucoside	Flavonoids	Flavonols	-	1	-	7550200	5930700	4401900	7620100	8098600	6536600	8349900	6278400	6656800	--	--
pmp001310	UPLC-MS/MS	Positive	627.16	303.1	626.148	C27H30O17	[M+H]+	-	-	6-Hydroxykaempferol-3,6-O-Diglucoside	Flavonoids	Flavonols	-	3	-	938510	746380	610430	819190	499110	568380	520180	442360	486480	--	--
Lmsp003729	UPLC-MS/MS	Positive	627.16	319.05	626.148	C27H30O17	[M+H]+	-	-	Myricetin-3-O-rutinoside*	Flavonoids	Flavonols	-	1	-	13736000	12896000	12065000	7820000	8492100	6992000	7657500	7125000	10505000	--	--
Hmlp003068	UPLC-MS/MS	Positive	627.15	303.05	626.148	C27H30O17	[M+H]+	-	-	Meratin	Flavonoids	Flavonoid	27215-04-9	1	-	10787000	6571500	8709800	8107200	9135900	5137700	8003000	8871900	9864800	--	--
pmb2970	UPLC-MS/MS	Negative	625.18	565.3	626.185	C28H34O16	[M-H]-	-	-	Hesperetin-5,7-di-O-glucoside	Flavonoids	Dihydroflavonol	-	3	-	114790	104070	100680	70128	45650	51374	222750	289340	249560	--	--
pmb0645	UPLC-MS/MS	Positive	627.19	465.2	626.185	C28H34O16	[M+H]+	-	-	Hesperetin-6-C-glucoside-7-O-glucoside	Flavonoids	Flavonoid carbonoside	-	3	-	790280	419460	700910	857940	641100	833640	460320	421000	447260	--	--
pmb0618	UPLC-MS/MS	Positive	627.19	465.1	626.185	C28H34O16	[M+H]+	-	-	Hesperetin-8-C-glucoside-3'-O-glucoside	Flavonoids	Flavonoid carbonoside	-	3	-	16239000	17873000	15166000	15093000	13993000	16408000	19995000	16982000	12728000	--	--
Hmyp007792	UPLC-MS/MS	Positive	636.41	495.4	635.414	C32H62NO9P	[M+H]+	-	-	PE(oxo-11:0/16:0)	Lipids	Glycerol ester	-	1	-	193040	130580	192490	55891	102820	34889	11622	3911.9	34948	--	--
Lmnp002762	UPLC-MS/MS	Positive	639.2	477.14	638.185	C29H34O16	[M+H]+	-	-	Cirsimaritin-8-C-[glucosyl-(1-2)]-glucoside	Flavonoids	Flavonoid carbonoside	-	3	-	13508	14051	16493	23881	9	9	81117	57182	46802	--	--
Lmgp004959	UPLC-MS/MS	Positive	639.19	331.08	638.185	C29H34O16	[M+H]+	-	-	Tricin-7-O-neohesperidoside	Flavonoids	Flavonoid	53766-40-8	3	-	97250	62026	73472	96924	80252	85848	118190	121360	122340	--	--
Hmcp001578	UPLC-MS/MS	Positive	641.17	479.11	640.163	C28H32O17	[M+H]+	-	-	Isorhamnetin-3,7-O-diglucoside	Flavonoids	Flavonols	6758-51-6	1	-	2827600	1680700	2193800	3371100	2513400	2923300	2909900	3507700	1690600	--	--
Lmsp003252	UPLC-MS/MS	Positive	641.17	317.07	640.164	C28H32O17	[M+H]+	-	-	Isorhamnetin-3-O-sophoroside	Flavonoids	Flavonols	-	1	-	5329400	5252300	4593200	5173400	5574100	5192100	6071600	7035400	4745000	--	--
Lmhp002800	UPLC-MS/MS	Positive	641.16	317.06	640.164	C28H32O17	[M+H]+	-	-	2'-Hydoxy,5-methoxyGenistein-4',7-O-diglucoside	Flavonoids	Isoflavones	-	3	-	9735.9	10304	12096	48840	49224	14632	24480	19066	13373	--	--
mws1506	UPLC-MS/MS	Negative	639.19	161	640.2	C29H36O16	[M-H]-	-	-	Plantamajoside	Phenolic acids	Phenolic acids	104777-68-6	1	-	22407	28850	18011	18370	35996	26348	19296	15451	14678	C10485	--
Hmqp003435	UPLC-MS/MS	Positive	651.15	271.06	650.142	C29H30O17	[M+H]+	-	-	Apigenin-7-O-(2''-O-apiosyl)(6''-Malonyl)glucoside	Flavonoids	Flavonoid	-	3	-	18236	25306	19301	9	9	9	54001	42683	55717	C05622	ko00944
pmb0578	UPLC-MS/MS	Positive	655.17	207	654.158	C32H30O15	[M+H]+	-	-	Luteolin-7-O-(6''-sinapoyl)glucoside	Flavonoids	Flavonoid	-	2	-	23936	33352	31298	26723	34735	31387	49000	46910	36255	--	--
Zmxp004503	UPLC-MS/MS	Positive	655.18	331.06	654.18	C29H34O17	[M+H]+	-	-	Tricin-5,7-O-diglucoside	Flavonoids	Flavonoid	-	3	-	30328	33640	21845	28850	22766	36840	41858	34576	38250	--	--
pmb0716	UPLC-MS/MS	Positive	655.19	331.08	654.18	C29H34O17	[M+H]+	-	-	Tricin-4'-O-glucoside-7-O-glucoside	Flavonoids	Flavonoid	-	3	-	6347	5432	7963.5	12068	4467.8	5410.8	9	9	9	--	--
pmb0713	UPLC-MS/MS	Positive	655.19	331.08	654.18	C29H34O17	[M+H]+	-	-	Tricin-7-O-(2''-O-glucosyl)glucoside	Flavonoids	Flavonoid	-	3	-	381500	364670	354040	362750	394860	472990	256850	336430	319900	--	--
Lmsp004749	UPLC-MS/MS	Positive	655.19	347.08	654.18	C29H34O17	[M+H]+	-	-	Syringetin-3-O-rutinoside	Flavonoids	Flavonoid	-	3	-	129240	111340	120290	130470	130810	134270	96251	128160	134370	--	--
Lmnp002616	UPLC-MS/MS	Positive	655.19	493.14	654.18	C29H34O17	[M+H]+	-	-	Cirsiliol-8-C-(2''-glucosyl)glucoside	Flavonoids	Flavonoid carbonoside	-	3	-	32879	30822	48941	29133	22895	10328	17092	33087	21445	--	--
Lmgp003803	UPLC-MS/MS	Positive	655.19	331.08	654.18	C29H34O17	[M+H]+	-	-	5,7,4'-Trihydroxy-6,8-dimethoxyisoflavone-7-O-galactoside-rhamnose	Flavonoids	Isoflavones	-	3	-	293910	246230	279290	285260	245440	321470	189340	205450	217630	--	--
pmb0530	UPLC-MS/MS	Positive	664.12	136.2	663.109	C21H27N7O14P2	[M+H]+	-	-	Nicotinic acid adenine dinucleotide	Nucleotides and derivatives	Nucleotides and derivatives	53-84-9	1	-	945410	1046800	1004900	1370400	1122300	1226800	1127600	1335500	1341600	C00003	ko00190,ko00730,ko00760,ko01100
pmb0579	UPLC-MS/MS	Positive	669.18	207	668.174	C33H32O15	[M+H]+	-	-	Chrysoeriol-7-O-(6''-sinapoyl)glucoside	Flavonoids	Flavonoid	-	3	-	24910	27194	15681	56555	56062	62930	9	13229	9	--	--
pmp001276	UPLC-MS/MS	Positive	677.37	677.37	676.367	C33H56O14	[M+H]+	-	-	1-Linolenoyl-rac-glycerol-diglucoside	Lipids	Free fatty acids	-	1	-	342630	349000	367610	423520	445210	373340	195920	135900	279410	--	--
Lmhp008513	UPLC-MS/MS	Positive	677.37	261.22	676.367	C33H56O14	[M+H]+	-	-	2-α-Linolenoyl-glycerol-1,3-di-O-glucoside	Lipids	Glycerol ester	-	2	-	17491	10866	9048.6	21435	12825	14349	10097	14064	6530.8	--	--
HJN102	UPLC-MS/MS	Negative	677.17	515.14	678.158	C34H30O15	[M-H]-	-	-	3,4,5-Tricaffeoylquinic acid	Phenolic acids	Phenolic acids	86632-03-3	3	-	30093	46333	24931	9842	5458.2	9	44898	43794	72873	--	--
pmb1312	UPLC-MS/MS	Positive	689.21	331.08	688.2	C33H36O16	[M+H]+	-	-	Tricin-4'-O-(guaiacylglycerol)ether-7-O-glucoside	Flavonoids	Flavonoid	-	3	-	33119	35324	33406	32354	31246	44522	31759	30153	32729	--	--
Hmcp001629	UPLC-MS/MS	Positive	697.16	449.1	696.153	C30H32O19	[M+H]+	-	-	Kaempferol-3-O-(6''-Malonyl)glucoside-7-O-Glucoside	Flavonoids	Flavonols	-	3	-	175790	161920	128420	170740	122520	158490	154700	182820	143730	--	--
pmb0738	UPLC-MS/MS	Positive	699.19	331.08	698.185	C34H34O16	[M+H]+	-	-	Tricin-7-O-(2''-Sinapoyl)glucoside	Flavonoids	Flavonoid	-	3	-	132730	127540	111120	128190	102960	130880	212000	166510	167360	--	--
Hmyp007396	UPLC-MS/MS	Positive	702.46	184.07	701.46	C37H68NO9P	[M+H]+	-	-	PC(oxo-11:0/18:2)	Lipids	PC	-	1	-	92489	86899	78668	85812	69555	54713	10127	2410.8	46828	--	--
pmb0706	UPLC-MS/MS	Positive	713.16	465.1	712.149	C30H32O20	[M+H]+	-	-	Quercetin-3-O-(6''-malonyl)glucosyl-5-O-glucoside	Flavonoids	Flavonols	-	1	-	88918	122540	93037	5361.5	9	9822.2	228690	287890	204020	--	--
pmn001372	UPLC-MS/MS	Negative	711.25	549.2	712.258	C33H44O17	[M-H]-	-	-	Medioresinol-4,4'-di-O-glucoside	Lignans and Coumarins	Lignans	88142-63-6	3	-	43682	27650	30644	57300	41637	57624	32643	26743	30630	--	--
Hmcp001658	UPLC-MS/MS	Positive	727.17	479.11	726.164	C31H34O20	[M+H]+	-	-	Isorhamnetin-3-O-(6''-malonylglucoside)-7-O-glucoside	Flavonoids	Flavonols	-	3	-	319180	281630	325870	105870	82934	99536	595580	449360	436820	--	--
Zmhp003322	UPLC-MS/MS	Positive	741.2	433.11	740.195	C36H36O17	[M+H]+	-	-	Isovitexin-2''-O-(6'''-p-coumaroyl)glucoside	Flavonoids	Flavonoid	-	2	-	129870	142200	140180	279320	328410	312030	18724	15475	7715.3	--	--
pmb0680	UPLC-MS/MS	Positive	741.2	147.3	740.195	C36H36O17	[M+H]+	-	-	Vitexin-7-O-(6''-p-coumaroyl)glucoside	Flavonoids	Flavonoid carbonoside	-	2	-	746120	653860	708590	1633500	1536700	1821100	78262	53448	81755	--	--
pmb2981	UPLC-MS/MS	Negative	739.21	563.2	740.216	C33H40O19	[M-H]-	-	-	Vitexin-7-O-rutinoside	Flavonoids	Flavonoid	-	3	-	516960	599610	520800	1189000	968010	1008300	154770	168280	159150	--	--
Lmzn001875	UPLC-MS/MS	Negative	741.23	579.18	742.232	C33H42O19	[M-H]-	-	-	Naringenin-7-O-Rutinoside-4'-O-glucoside	Flavonoids	Flavonoid	-	3	-	78932	35994	64409	18664	13849	16936	102560	96224	114110	--	--
Cmqn003939	UPLC-MS/MS	Negative	741.26	501.17	742.268	C34H46O18	[M-H]-	-	-	liriodendrin;Syringaresinol-di-O-glucoside	Lignans and Coumarins	Lignans	573-44-4	3	-	12724	9809.5	9201.2	15077	9281	11690	6168.2	8576.2	6115	--	--
pme2651	UPLC-MS/MS	Negative	742.1	620.1	743.075	C21H28N7O17P3	[M-H]-	-	-	NADP (Nicotinamide adenine dinucleotide phosphate)	Nucleotides and derivatives	Nucleotides and derivatives	53-59-8	2	-	203860	220240	187600	188720	188960	234850	162580	166640	175980	C00006	ko00195,ko00480,ko00760,ko01100
pmb0660	UPLC-MS/MS	Positive	757.2	147.1	756.19	C36H36O18	[M+H]+	-	-	Isoorientin-7-O-(6''-p-coumaroyl)glucoside	Flavonoids	Flavonoid carbonoside	-	1	-	137700	130180	136890	288220	316130	272400	9	9	9	--	--
pmb0574	UPLC-MS/MS	Positive	757.2	581.2	756.19	C36H36O18	[M+H]+	-	-	Luteolin-7-O-glucoside-5-O-(6''-feruloyl)arabinoside	Flavonoids	Flavonoid	-	3	-	18319	7928.5	17233	28687	18504	30625	9	9	9	--	--
Zmgp002857	UPLC-MS/MS	Positive	757.22	303.05	756.211	C33H40O20	[M+H]+	-	-	quercetin 3-O-α-rhamnopyranosyl (1→2)-[α-rhamnopyranosyl (1→6)]-β-glucopyranoside	Flavonoids	Flavonoid	-	2	-	83236	113760	102920	219360	232800	208290	18915	23255	16733	--	--
Zmgp002582	UPLC-MS/MS	Positive	757.22	433.11	756.211	C33H40O20	[M+H]+	-	-	kaempferol 3-O-β-glucopyranosyl (1 → 2)-β-galactopyranoside 7-O-α-rhamnopyranoside	Flavonoids	Flavonoid	-	3	-	251860	212380	205840	151510	148960	161180	297190	240420	215670	--	--
pmp001105	UPLC-MS/MS	Positive	757.22	287.06	756.211	C33H40O20	[M+H]+	-	-	Kaempferol-3-O-neohesperidoside-7-O-glucoside	Flavonoids	Flavonols	-	2	-	3745400	3595500	3449100	6266300	5522000	5664100	1878200	1623200	1830000	--	--
pmb0613	UPLC-MS/MS	Positive	757.22	577.2	756.211	C33H40O20	[M+H]+	-	-	Apigenin-6,8-di-C-glucoside-4'-O-glucoside	Flavonoids	Flavonoid	-	2	-	91271	119520	80302	9	9	9	221440	208920	166500	--	--
Lnrp102163	UPLC-MS/MS	Positive	757.21	303.05	756.211	C33H40O20	[M+H]+	-	-	Quercetin-3-O-rutinoside-7-O-rhamnoside	Flavonoids	Flavonols	-	2	-	1573200	1580200	1319500	1936700	1927500	1614400	1119500	1235600	1834500	--	--
Lmsp003161	UPLC-MS/MS	Positive	757.22	287.06	756.211	C33H40O20	[M+H]+	-	-	Kaempferol-3-O-sophoroside-7-O-rhamnoside	Flavonoids	Flavonols	-	2	-	3064600	3208200	3122300	5217500	4273800	5377900	2005000	1644000	1592600	--	--
HJAP127	UPLC-MS/MS	Positive	757.22	303.05	756.212	C33H40O20	[M+H]+	-	-	Quercetin-3-O-(2''-O-Rhamnosyl)rutinoside	Flavonoids	Flavonols	55696-57-6	1	-	123760	139540	117640	247400	242420	226450	11948	6286.2	9127.8	--	--
pmb0678	UPLC-MS/MS	Positive	771.21	177.1	770.206	C37H38O18	[M+H]+	-	-	Vitexin-7-O-(6''-feruloyl)glucoside	Flavonoids	Flavonoid carbonoside	-	2	-	2249200	2412200	2422700	5755900	4301900	5103100	112720	135550	119500	--	--
Zmcn004206	UPLC-MS/MS	Negative	771.18	609.14	772.185	C36H36O19	[M-H]-	-	-	kaempferol-3-caffeoyldiglucoside	Flavonoids	Flavonoid	-	2	-	2488600	2183200	2421500	3436400	3608700	3981800	1090300	1134100	1047600	--	--
Zmhp002640	UPLC-MS/MS	Positive	773.21	303.05	772.206	C33H40O21	[M+H]+	-	-	6-Hydroxykaempferol 3-Rutinoside-6-glucoside	Flavonoids	Flavonoid	-	2	-	8416400	8504200	8546200	8804700	8105700	8352000	8455200	8566100	8100800	--	--
pmp001314	UPLC-MS/MS	Positive	773.21	627.2	772.206	C33H40O21	[M+H]+	-	-	6-Hydroxykaempferol-3-O-rutin-6-O-glucoside	Flavonoids	Flavonols	-	2	-	353840	398360	445920	601850	482810	429580	266220	222470	246250	--	--
Lmsp002982	UPLC-MS/MS	Positive	773.21	303.05	772.206	C33H40O21	[M+H]+	-	-	Quercetin-3-O-sophoroside-7-O-rhamnoside	Flavonoids	Flavonols	-	2	-	7689700	7762600	7369200	7450100	7820200	8134100	7464800	7836300	7736500	--	--
Lmmp002529	UPLC-MS/MS	Positive	773.21	465.1	772.206	C33H40O21	[M+H]+	-	-	Gossypetin-3-O-rutinoside-8-O-rhamnoside	Flavonoids	Flavonols	-	1	-	11746000	13776000	9774600	17838000	16500000	16024000	7732900	6277400	6817400	--	--
Lmmp002334	UPLC-MS/MS	Positive	773.21	303.05	772.206	C33H40O21	[M+H]+	-	-	Quercetin-3-O-rutinoside-7-O-glucoside	Flavonoids	Flavonols	-	1	-	1393800	1719200	1986800	1429400	2756100	2150600	901560	781470	680100	--	--
pme2746	UPLC-MS/MS	Negative	784.15	437	785.157	C27H33N9O15P2	[M-H]-	-	-	Riboflavin 5'-Adenosine Diphosphate	Nucleotides and derivatives	Nucleotides and derivatives	146-14-5	1	-	1043500	1195700	981810	1645000	1437600	1269200	787950	779270	714570	C00016	ko00740,ko01100,ko01110
Hmcp001589	UPLC-MS/MS	Positive	787.23	317.06	786.221	C34H42O21	[M+H]+	-	-	Isorhamnetin-3-O-rutinoside-4'-O-glucoside	Flavonoids	Flavonols	111393-97-6	2	-	4161400	4410800	4648400	3711800	3605100	4060400	5952000	6324400	5786200	--	--
Lmsp003790	UPLC-MS/MS	Positive	787.23	317.07	786.222	C34H42O21	[M+H]+	-	-	Isorhamnetin-3-O-sophoroside-7-O-rhamnoside	Flavonoids	Flavonols	41328-75-0	2	-	254710	146930	199990	198710	229190	253920	149050	93914	88414	--	--
mws1150	UPLC-MS/MS	Negative	785.25	623.2	786.258	C35H46O20	[M-H]-	-	-	Echinacoside	Phenolic acids	Phenolic acids	82854-37-3	2	-	187740	184320	183230	274690	296240	295480	138470	133800	85976	C10450	--
Zmhp001956	UPLC-MS/MS	Positive	789.2	303.05	788.201	C33H40O22	[M+H]+	-	-	6-Hydroxykaempferol 3,6,7-triglucoside	Flavonoids	Flavonoid	-	2	-	222220	239450	236710	164320	144100	162150	283550	375300	332210	--	--
pmp001312	UPLC-MS/MS	Positive	789.21	303.1	788.201	C33H40O22	[M+H]+	-	-	6-Hydroxykaempferol-3,7,6-O-triglycoside	Flavonoids	Flavonols	-	1	-	4812100	4213000	4895000	593210	523140	527720	8793600	7856300	7581700	--	--
pmb0682	UPLC-MS/MS	Positive	801.22	445.11	800.216	C38H40O19	[M+H]+	-	-	Apigenin-8-C-glucoside-7-O-(6''-sinapoyl)glucoside	Flavonoids	Flavonoid carbonoside	-	1	-	30385	28035	37863	78998	51522	47106	9	4745	9	--	--
pmb0676	UPLC-MS/MS	Positive	801.22	207.1	800.216	C38H40O19	[M+H]+	-	-	Chrysoeriol-8-C-glucoside-7-O-(6''-feruloyl)glucoside	Flavonoids	Flavonoid carbonoside	-	1	-	381170	408180	405010	652560	794930	778150	15720	20257	20567	--	--
pmb0666	UPLC-MS/MS	Positive	801.22	639.1	800.216	C38H40O19	[M+H]+	-	-	Isovitexin-7-O-(6''-sinapoyl)glucoside	Flavonoids	Flavonoid carbonoside	-	2	-	33516	38496	45225	63380	71280	68088	10447	9	9	--	--
Lmdp004426	UPLC-MS/MS	Positive	833.21	369.12	832.206	C38H40O21	[M+H]+	-	-	Quercetin-3-O-[2''-O-(6'''-sinapoyl)glucosyl]glucoside	Flavonoids	Flavonols	-	3	-	89800	53271	61799	39984	37163	32415	85352	84684	98778	--	--
HJAP136	UPLC-MS/MS	Positive	919.27	303.05	918.264	C39H50O25	[M+H]+	-	-	Quercetin-3-O-(2''-O-rhamnosyl)rutinoside-7-O-glucoside	Flavonoids	Flavonols	-	2	-	95664	153320	114140	144410	162970	121140	125950	142920	127950	--	--
Lmdp004461	UPLC-MS/MS	Positive	949.26	339.11	948.254	C43H48O24	[M+H]+	-	-	Quercetin-3-O-(6''-feruloyl)glucoside-7-O-rutinoside	Flavonoids	Flavonols	-	2	-	101780	90414	83709	139740	124940	130540	41140	35475	55692	--	--
Lmdp004311	UPLC-MS/MS	Positive	979.27	369.12	978.264	C44H50O25	[M+H]+	-	-	Quercetin-3-O-(6''-sinapoyl)glucoside-7-O-rutinoside	Flavonoids	Flavonols	-	2	-	54185	77308	47365	38054	17780	36439	119850	109220	82401	--	--
XMW3107	GC-MS	Positive	-	-	67.99	C3O2	-	1083.52	-	1,2-Propadiene-1,3-dione	Ketone	-	504-64-3	-	46.9	43331.9	36707	38355.6	32780.8	38313.9	35159.5	36854	33746	35751.7	--	--
XMW0579	GC-MS	Positive	-	-	85.039	CH3N5	-	1694.72	-	5H-Tetrazol-5-Amine	Amine	-	1000273-02-0	-	61.4	3870.89	4368.46	3856.7	5248.97	4697.37	5214.93	4849.31	3604.35	3659.65	--	--
XMW3650	GC-MS	Positive	-	-	95.999	H4N2O2S	-	1256.46	-	Sulfamide	Sulfur compounds	-	7803-58-9	-	59.9	21782.5	18981.7	22758.4	17752.2	16890.8	17438.4	20410.8	17574.5	18473.9	--	--
XMW1430	GC-MS	Positive	-	-	96.021	C5H4O2	-	910.92	832	3-FurAldehyde	Aldehyde	-	498-60-2	-	81.9	35526.2	37745.1	37812.5	65125.3	63423	54015.3	52260.9	33547.9	36301.8	--	--
XMW2556	GC-MS	Positive	-	-	96.032	C4H4N2O	-	988.51	1122	1,4-Dihydro-4-oxopyridazine	Heterocyclic compound	-	17417-57-1	-	68	258938	293640	355435	302443	317537	311904	298760	258219	334456	--	--
XMW0123	GC-MS	Positive	-	-	97.016	C4H3NO2	-	863.27	916	1H-Pyrrole-2,5-dione	Amine	-	541-59-3	-	44.8	96944.4	86925.4	89709.6	84733.9	82658.9	77770.1	85472.2	52256.5	81350.2	C07272	--
XMW2655	GC-MS	Positive	-	-	98.073	C6H10O	-	843.78	797	4-Hexyn-3-ol	Alcohol	-	20739-59-7	-	70.6	52889.2	45866.7	45068.8	107668	101078	84895.7	69788.2	38090.1	43608.3	--	--
XMW1115	GC-MS	Positive	-	-	98.073	C6H10O	-	762.21	748	Isopropenyl ethyl ketone	Ketone	-	25044-01-3	-	79.3	26876.2	24087.9	26256.2	41840	39533.6	39760.4	26749.4	16769.9	22654.6	--	--
KMW0088	GC-MS	Positive	-	-	98.073	C6H10O	-	850.83	854	2-Hexenal, (E)-	Aldehyde	-	6728-26-3	-	96.4	1.20998e+06	1.18077e+06	1.11784e+06	2.60061e+06	2.44582e+06	2.10325e+06	1.73913e+06	907055	1.08029e+06	C08497	--
KMW0066	GC-MS	Positive	-	-	100.089	C6H12O	-	795.66	801	Hexanal	Aldehyde	-	66-25-1	-	80.4	225487	218761	206818	364565	330874	294684	295055	152317	198235	--	--
XMW2887	GC-MS	Positive	-	-	109.053	C6H7NO	-	1031.74	937	6-methyl-2(1H)-Pyridone	Heterocyclic compound	-	3279-76-3	-	69	658932	626553	650114	573291	600311	563429	603615	574916	593695	--	--
XMW2395	GC-MS	Positive	-	-	110.048	C5H6N2O	-	1061.23	975	6-methyl-3(2H)-Pyridazinone	Heterocyclic compound	-	13327-27-0	-	72.3	8.98026e+06	8.10618e+06	8.09833e+06	7.73772e+06	8.01312e+06	7.59131e+06	7.93012e+06	7.09912e+06	7.73655e+06	--	--
XMW0903	GC-MS	Positive	-	-	114.116	C6H14N2	-	899.76	1104	2-PyrrolidinemethanAmine, N-methyl-, (S)-	Amine	-	66411-54-9	-	87.6	8162.21	8010.63	7972.95	10847.4	9894.01	10339.1	10877.5	8571.22	8460.58	--	--
KMW0176	GC-MS	Positive	-	-	126.104	C8H14O	-	983.62	974	5-Hepten-2-one, 6-methyl-	Ketone	-	110-93-0	-	74.4	218750	198923	213539	162076	154690	169398	236593	175209	281185	C07287	--
XMW2771	GC-MS	Positive	-	-	126.141	C9H18	-	956.86	985	3,5,5-trimethyl-2-Hexene	Hydrocarbons	-	26456-76-8	-	81.3	10254.1	17008.1	15930.3	21266.4	18457.6	17144.1	19918.6	13722.9	16455.5	--	--
XMW2279	GC-MS	Positive	-	-	127.063	C6H9NO2	-	1399.28	-	1-acetoxy-2-isocyano-Propane	Nitrogen compounds	-	109862-24-0	-	55.6	121336	126337	126676	90923.5	89908.6	86269.5	123327	124576	126565	--	--
XMW0492	GC-MS	Positive	-	-	127.063	C6H9NO2	-	1083.74	1191	2,5-Pyrrolidinedione, 1-ethyl-	Ketone	-	2314-78-5	-	45.1	50733	60448.2	61069.9	56073.3	58235.1	54771.1	53603.6	56634.6	57716.4	--	--
KMW0186	GC-MS	Positive	-	-	128.12	C8H16O	-	1002.1	1006	Octanal	Aldehyde	-	124-13-0	-	93.8	34828.4	30364.7	28516.5	32133.3	35630.1	32608.8	32840.1	20055.2	30374.9	C01545	--
XMW0295	GC-MS	Positive	-	-	132.094	C10H12	-	1091.1	1073	Benzene, 1-methyl-3-(1-methylethenyl)-	Aromatics	-	1124-20-5	-	88.9	49266.9	50325.9	51581.9	19699.1	20033.4	20411.8	57565.1	53054.4	58155.4	--	--
XMW0727	GC-MS	Positive	-	-	134.073	C9H10O	-	1218.08	1208	BenzAldehyde, 2,5-dimethyl-	Aldehyde	-	5779-94-2	-	88.4	277112	261570	267217	24240.8	24094.6	30035.4	52952.2	28894.8	22444.7	--	--
XMW0537	GC-MS	Positive	-	-	134.073	C9H10O	-	1504.27	1267	1H-Inden-5-ol, 2,3-dihydro-	Phenol	-	1470-94-6	-	41.5	10460.2	10441.4	8352.43	11287.3	11577.9	9837.87	13757.7	12289.3	12331.9	--	--
XMW0170	GC-MS	Positive	-	-	134.073	C9H10O	-	1165.09	1168	BenzAldehyde, 3-ethyl-	Aldehyde	-	34246-54-3	-	85.2	43541.6	46826.4	32066.6	127344	102641	99934.6	42999.5	35821.1	33890.5	--	--
XMW3079	GC-MS	Positive	-	-	134.11	C10H14	-	1152.44	1145	1,2,3,4-tetramethyl-Benzene	Aromatics	-	488-23-3	-	56.9	10163.3	9777.02	11152.1	4493.04	4650.23	4911.23	11401.3	11758.2	13441.7	--	--
XMW0906	GC-MS	Positive	-	-	134.11	C10H14	-	1130.28	975	Benzene, tert-butyl-	Aromatics	-	98-06-6	-	86.1	29897.8	27822.1	27941.3	18770.3	19245.1	19127.5	28739.3	29959.7	32506.6	--	--
XMW0366	GC-MS	Positive	-	-	134.11	C10H14	-	1025.4	1133	Benzene, 1,2,3,5-tetramethyl-	Aromatics	-	527-53-7	-	56.9	19832.1	19588.4	23899.2	13288.9	12615.8	13811.1	21710.1	20614.4	25000	--	--
XMW2648	GC-MS	Positive	-	-	136.039	C5H4N4O	-	1481.88	1247	1,2,4-Triazolo[4,3-b]pyridazin-6(5H)-one	Heterocyclic compound	-	20552-63-0	-	47.5	798139	772168	740436	821920	828397	806846	729335	692287	733798	--	--
XMW0019	GC-MS	Positive	-	-	136.052	C8H8O2	-	1232.33	1457	Acetophenone, 4'-hydroxy-	Ketone	-	99-93-4	-	62	13026.6	13109.5	14484.5	9476.58	10938.7	10503.9	14649.9	13853.7	16498.2	C10700	ko01100
XMW2386	GC-MS	Positive	-	-	136.1	C8H12N2	-	1257.4	1084	2,6-diethyl-Pyrazine	Heterocyclic compound	-	13067-27-1	-	66.1	73948.2	60648.8	60424.5	9	9	9	83605.5	93564.3	92569.7	--	--
KMW0259	GC-MS	Positive	-	-	136.125	C10H16	-	1099.3	1074	.gamma.-Terpinene	Terpenoids	-	99-85-4	-	63	337570	303125	290236	276267	277423	277740	316736	242455	291284	C09900	--
KMW0220	GC-MS	Positive	-	-	136.125	C10H16	-	1045.49	1009	3-Carene	Terpenoids	-	13466-78-9	-	86.6	72234.4	70298.7	80669.5	51830.3	57193.2	58884.1	71177.1	65092.8	81815.7	--	--
KMW0153	GC-MS	Positive	-	-	136.125	C10H16	-	989.4	938	α-thujene	Terpenoids	-	2867-05-2	-	67.5	105401	107789	131958	102350	107328	108892	105442	109710	129314	--	--
XMW0412	GC-MS	Positive	-	-	138.068	C8H10O2	-	1107.2	1099	3-Acetyl-2,5-dimethyl furan	Heterocyclic compound	-	10599-70-9	-	56.6	19597	20332	18963.6	21189.6	20828	20346.7	19309.5	14964.3	17793.1	--	--
XMW2451	GC-MS	Positive	-	-	138.079	C7H10N2O	-	1345.02	1259	3-Amino-4,6-dimethylpyridone-2(1H)	Heterocyclic compound	-	143708-29-6	-	61.3	3787.54	4170.92	3128.96	4066.14	3796.24	4079.86	3476.92	3650.58	3462.03	--	--
XMW2523	GC-MS	Positive	-	-	138.104	C9H14O	-	1061.45	1126	1-(1-cyclohexen-1-yl)-1-Propanone	Ketone	-	1655-03-4	-	65.6	186616	221057	218390	208403	212408	203742	216158	189800	210275	--	--
KMW0345	GC-MS	Positive	-	-	138.104	C9H14O	-	1151.88	1154	2,6-Nonadienal, (E,Z)-	Aldehyde	-	557-48-2	-	74.3	16436.5	13580.6	12767.1	18935.6	19376.7	17486.4	17964.6	12269	14483.5	C08499	--
XMW2927	GC-MS	Positive	-	-	138.141	C10H18	-	1050.86	904	3,3,6-trimethyl-1,5-Heptadiene	Hydrocarbons	-	35387-63-4	-	63.1	15529.2	14561.5	14989.4	9409.35	7619.73	9823.35	22662.9	15840.2	25919.2	--	--
XMW2015	GC-MS	Positive	-	-	139.1	C8H13NO	-	1044.23	1092	6-methyl-7-Oxa-8-azabicyclo[4.2.1]non-8-ene	Heterocyclic compound	-	1000362-10-7	-	78	74241.8	83663	103539	85707.9	90118.7	91546.6	85265.2	73408.3	95732.7	--	--
KMW0282	GC-MS	Positive	-	-	142.136	C9H18O	-	1103.49	1104	Nonanal	Aldehyde	-	124-19-6	-	94.4	241120	216573	206466	242695	249373	253980	224120	162361	213847	--	--
XMW2681	GC-MS	Positive	-	-	144.094	C11H12	-	1385.51	1179	1,3-dimethyl-1H-Indene	Aromatics	-	2177-48-2	-	55.5	59068.2	64724.5	73539	33371.8	32163.3	33353.3	69320.8	78399.7	80587.9	--	--
NMW0042	GC-MS	Positive	-	-	144.115	C8H16O2	-	1101.36	1116	Valproic Acid	Acid	-	99-66-1	-	57.9	10133.7	11490	12979.5	12540.6	12830	12672.6	11228.8	10467	11672.2	C07185	--
KMW0344	GC-MS	Positive	-	-	144.151	C9H20O	-	1306.04	1154	1-Nonanol	Alcohol	-	143-08-8	-	77.2	9964.95	8614.78	8998.82	10932.3	9504.85	9540.36	9368.41	7434.73	7652.13	C14696	--
XMW2896	GC-MS	Positive	-	-	146.04	C6H10O2S	-	1169.09	1100	Ketone, methyl 2-methyl-1,3-oxothiolan-2-yl	Heterocyclic compound	-	33266-06-7	-	57.4	1.51325e+06	1.39552e+06	1.34703e+06	1.31303e+06	1.31316e+06	1.2642e+06	1.38083e+06	1.19481e+06	1.33075e+06	--	--
XMW2532	GC-MS	Positive	-	-	146.11	C11H14	-	1444.37	1273	2,3-dihydro-4,6-dimethyl-1H-Indene	Aromatics	-	1685-82-1	-	51.4	27250.4	29929.1	23765.2	21909.4	28683.7	20348.7	30963.4	30513.6	27639.3	--	--
XMW2452	GC-MS	Positive	-	-	147.068	C9H9NO	-	1318.35	1187	1-(2-furanylmethyl)-1H-Pyrrole	Heterocyclic compound	-	1438-94-4	-	45.7	20944.2	20027.7	18740.7	19378.3	17481.5	17296.3	24588.7	17735.3	21009.3	--	--
XMW1383	GC-MS	Positive	-	-	147.989	C5H9Br	-	988.51	905	bromo-Cyclopentane	Halogenated hydrocarbons	-	137-43-9	-	74.6	211280	239565	284820	236914	243522	250186	242320	216092	273903	--	--
XMW0533	GC-MS	Positive	-	-	148.035	C9H8S	-	1243.45	1259	3-Methylbenzothiophene	Heterocyclic compound	-	1455-18-1	-	86.5	27303.2	24118.9	24036	13742.6	13733.8	13910.7	26785.8	27526.9	26951.3	--	--
NMW0156	GC-MS	Positive	-	-	149.03	C8H7NS	-	1573.82	1364	Benzene, (isothiocyanatomethyl)-	Heterocyclic compound	-	622-78-6	-	54.1	7610.64	7116.21	6273.63	7876.85	6798.66	6897.1	6330.49	5678.86	7265.41	C03098	--
XMW0737	GC-MS	Positive	-	-	150.068	C9H10O2	-	1310.93	1363	Ethanone, 1-(2-hydroxy-5-methylphenyl)-	Ketone	-	1450-72-2	-	79.6	63622.1	58728.5	57695.3	97155.6	96205.1	93556.8	79965.5	62775.5	57689.4	--	--
NMW0153	GC-MS	Positive	-	-	150.104	C10H14O	-	1201.32	1362	Phenol, 4-butyl-	Phenol	-	1638-22-8	-	58.6	14283.9	15287	14361.1	14252.2	14094.8	13165.9	15832.8	12516.3	14337.5	C14464	--
NMW0301	GC-MS	Positive	-	-	151.063	C8H9NO2	-	1586.48	1697	Acetaminophen	Phenol	-	103-90-2	-	54.6	13562.6	16585.1	17787.2	13552.9	11687.7	13296	13212	15712.5	14131.3	C06804	--
XMW0927	GC-MS	Positive	-	-	152.084	C9H12O2	-	1144.27	1144	2,6,6-Trimethyl-2-cyclohexene-1,4-dione	Ketone	-	1125-21-9	-	62.4	8751.51	7827.53	8917.23	3812.57	4046.8	4075.67	8980.51	9220.82	9182.68	--	--
XMW0681	GC-MS	Positive	-	-	152.12	C10H16O	-	1273.73	1156	6-Octenal, 7-methyl-3-methylene-	Aldehyde	-	55050-40-3	-	42.8	10748	11310.5	11422.7	13586.9	13170.4	13534.1	12567.1	11562.2	12469.8	--	--
XMW0166	GC-MS	Positive	-	-	152.12	C10H16O	-	1266.51	1144	3,7-Nonadien-2-one, 8-methyl-, (E)-	Ketone	-	35408-14-1	-	73.6	33903.8	30791.3	30440.2	30445.3	27161.1	23967.2	60722.7	32137.6	42672.2	--	--
D193	GC-MS	Positive	-	-	152.12	C10H16O	-	1151.93	1296	p-Mentha-1,8-dien-7-ol	Terpenoids	-	536-59-4	-	69.7	16691.4	13604.1	12767.1	18808.4	19376.7	18251.5	17964.6	12269	14331.2	C02452	ko00902,ko00903,ko01110
XMW1134	GC-MS	Positive	-	-	152.131	C9H16N2	-	1440.82	1316	Pyrimidine, 4-butyl-3,4-dihydro-5-methyl-	Heterocyclic compound	-	1000115-50-2	-	59.2	10618.6	10577.4	12103.9	7202.79	9458.87	10250.6	16730.2	19196.7	16092.3	--	--
XMW2907	GC-MS	Positive	-	-	153.079	C8H11NO2	-	1244.92	1294	3,4-diethyl-1H-Pyrrole-2,5-dione	Heterocyclic compound	-	34085-07-9	-	54.5	138108	127762	127403	129338	130486	128398	123119	111857	124965	--	--
NMW0071	GC-MS	Positive	-	-	154.136	C10H18O	-	1197.51	1190	L-.alpha.-Terpineol	Terpenoids	-	10482-56-1	-	92	224594	200482	203115	177409	181779	181278	210200	190743	207915	C11393	ko00902,ko01100,ko01110
KMW0374	GC-MS	Positive	-	-	154.136	C10H18O	-	1249.12	1186	4-Hexen-1-ol, 5-methyl-2-(1-methylethenyl)-, (R)-	Terpenoids	-	498-16-8	-	67.2	190309	119266	127118	116698	106268	114909	100736	104450	123769	--	--
XMW3703	GC-MS	Positive	-	-	154.147	C9H18N2	-	1028.8	1242	2-Propanamine, 2-methyl-N2-[1-tetrahydro-1H-1-pyrrolylmethylidene]	Heterocyclic compound	-	85152-51-8	-	57.4	27925.9	30525	38330.8	31509.4	34244.9	34550.8	30775.3	29412.5	33369.1	--	--
KMW0399	GC-MS	Positive	-	-	156.151	C10H20O	-	1205.01	1209	Decanal	Aldehyde	-	112-31-2	-	89.1	14461.4	13276.2	13463.8	13778.1	12425.4	13871.5	14576	12748	12396.7	C12307	--
XMW3614	GC-MS	Positive	-	-	157.147	C9H19NO	-	1298.35	1310	N,N-dibutyl-Formamide	Amine	-	761-65-9	-	55.6	97696.3	92338.1	87093.6	81264.8	87479.2	87933.8	93483.3	89351.3	93490.6	--	--
KMW0707	GC-MS	Positive	-	-	158.058	C7H10O4	-	1649.28	1893	5-Oxotetrahydrofuran-2-carboxylic acid, ethyl ester	Ester	-	1126-51-8	-	51.5	85370.8	93683	91336.7	102599	96587.9	101153	96575.8	85674.6	94191.7	--	--
XMW0963	GC-MS	Positive	-	-	158.11	C12H14	-	1287.93	1253	1H-Indene, 1,1,3-trimethyl-	Aromatics	-	2177-45-9	-	83.8	17699.7	20138.7	21389.1	11182.2	9393.65	10477.1	20356.5	22235.3	24276.3	--	--
XMW0805	GC-MS	Positive	-	-	162.05	C10H10S	-	1522.31	1412	Benzo[b]thiophene, 2-ethyl-	Heterocyclic compound	-	1196-81-2	-	59.1	42689.6	41240.9	38109.8	14616.1	18404.2	16690.5	49257.4	55221.9	52113	--	--
XMW1172	GC-MS	Positive	-	-	164.047	C9H8O3	-	1447.98	1378	3,6-Dimethyl-4H-furo[3,2-c]pyran-4-one	Heterocyclic Compound	-	36745-38-7	-	71.8	23574.7	22033.8	20287.4	7475.85	6475.43	6798.98	26626.8	26895.2	27550.7	--	--
XMW2882	GC-MS	Positive	-	-	164.084	C10H12O2	-	1468.24	1273	4-Ethylphenyl acetate	Ester	-	3245-23-6	-	58.8	40349.5	38637.7	32515	9	9	9	37104.3	39311.4	44468.4	--	--
XMW2108	GC-MS	Positive	-	-	164.12	C11H16O	-	1138.5	1217	4-Methylphenol, 2-methylpropyl ether	Aromatics	-	1000395-16-3	-	49.5	4896	4901.49	5092.49	4965.03	4899.22	5153.61	4466.39	4358.24	4741.53	--	--
XMW1464	GC-MS	Positive	-	-	164.12	C11H16O	-	1032.36	1238	Benzene, (butoxymethyl)-	Ether	-	588-67-0	-	62.5	98220	128374	139637	125097	137835	127300	133094	117848	130869	--	--
XMW0546	GC-MS	Positive	-	-	167.167	C11H21N	-	1193.31	1293	(5R,8aR)-5-Propyloctahydroindolizine	Heterocyclic compound	-	120057-35-4	-	59.7	7.54261e+06	6.79337e+06	6.57523e+06	6.5621e+06	6.78489e+06	6.54093e+06	6.76593e+06	5.90131e+06	6.47762e+06	--	--
XMW0716	GC-MS	Positive	-	-	168.042	C8H8O4	-	1234.26	1290	3-Acetoxy-2-methyl-pyran-4-one	Ketone	-	1000373-04-9	-	50.4	17141	16331.8	18883.5	15101.1	16095.9	15827.7	16156.8	16976.4	21747.3	--	--
XMW3690	GC-MS	Positive	-	-	168.115	C10H16O2	-	1071.47	1205	(E)-2-methyl-2-Butenoic acid,3-methyl-3-butenyl ester	Ester	-	83783-87-3	-	58.9	49850.6	44974	44646.9	45713.8	45735.2	47940.6	50648.5	40316.7	47063.3	--	--
KMW0370	GC-MS	Positive	-	-	168.151	C11H20O	-	1244.38	1182	2-Methylisoborneol	Terpenoids	-	2371-42-8	-	69.4	8.05891e+06	7.52294e+06	7.41244e+06	7.3948e+06	7.66335e+06	7.33622e+06	7.37442e+06	6.67293e+06	7.22477e+06	C20243	--
XMW1125	GC-MS	Positive	-	-	168.188	C12H24	-	1057.34	1158	4-Undecene, 3-methyl-, (Z)-	Hydrocarbons	-	74645-87-7	-	77.2	28919.8	34559.5	29034.6	56824.8	58237.4	40921.7	120439	40757.1	48817.2	--	--
XMW2669	GC-MS	Positive	-	-	170.11	C13H14	-	1540.28	1571	1,4,6-trimethyl-Naphthalene	Aromatics	-	2131-42-2	-	81	17020.2	20218	23585.9	8347.75	7282.25	7887.91	21954.8	25911.5	27400	--	--
KMW0297	GC-MS	Positive	-	-	170.131	C10H18O2	-	1071.62	1172	trans-Linalool oxide (furanoid)	Heterocyclic compound	-	34995-77-2	-	92.6	70344.4	61515.8	65683.2	58579.2	59793	61200.6	65694.1	52611.1	63730.6	--	--
XMW1251	GC-MS	Positive	-	-	172.002	C7H8OS2	-	1579.76	1373	2-Propanone, 1-(5-methyl-3H-1,2-dithiol-3-ylidene)-	Sulfur compounds	-	1005-55-6	-	52.3	13042.6	10389.1	8143.98	4323.85	3914.41	4162.16	8582.11	8776.46	8675.9	--	--
XMW1254	GC-MS	Positive	-	-	172.125	C13H16	-	1370.2	1465	Naphthalene, 1,2-dihydro-4,5,7-trimethyl-	Aromatics	-	53156-11-9	-	79.9	15795.9	18561.6	16325.3	5785.68	5393.71	6469.99	18200.2	22920	22042.9	--	--
XMW1093	GC-MS	Positive	-	-	172.125	C13H16	-	1357.99	1396	1, 1, 5-Trimethyl-1, 2-dihydronaphthalene	Terpenoids	-	1000357-25-8	-	97.3	447049	495185	514201	304452	277948	287833	475357	530001	529997	--	--
NMW0272	GC-MS	Positive	-	-	173.048	C10H7NO2	-	1546	1638	Naphthalene, 2-nitro-	Phenol	-	581-89-5	-	45.9	4277.86	4601.75	4131.24	9	9	9	5291.61	5980.11	5093.47	C19474	--
XMW3683	GC-MS	Positive	-	-	174.104	C12H14O	-	1278.97	1294	4-(1,1-dimethyl-2-propynyloxy)-Toluene	Aromatics	-	82719-54-8	-	76.8	24744.6	27179.8	35892.6	15065.8	16125.1	14896.3	33112.8	33161.5	40174.1	--	--
XMW3767	GC-MS	Positive	-	-	174.141	C13H18	-	1275.22	1350	2,3-dihydro-1,1,4,6-tetramethyl-1H-Indene	Aromatics	-	941-60-6	-	75.9	23430.5	27196.5	30926.3	14646.3	12832.8	14337.4	28344.1	31729.9	32765	--	--
XMW2847	GC-MS	Positive	-	-	174.141	C13H18	-	1320.87	1454	1,2,3,4-tetrahydro-1,6,8-trimethyl-Naphthalene	Aromatics	-	30316-36-0	-	92.7	505221	498112	474565	234688	217134	241103	516979	503030	526586	--	--
XMW2677	GC-MS	Positive	-	-	174.141	C13H18	-	1306.61	1250	1,2,3,4-tetrahydro-1,5,7-trimethyl-Naphthalene	Aromatics	-	21693-55-0	-	86.4	196807	197514	187353	103777	81739.2	90216.6	198787	227272	224651	--	--
XMW0950	GC-MS	Positive	-	-	174.141	C13H18	-	1230.77	1402	Naphthalene, 1,2,3,4-tetrahydro-1,4,6-trimethyl-	Aromatics	-	22824-32-4	-	71.9	34956.8	34498.8	36416.3	14372.9	15144.5	14321.1	34699.9	39963.4	41127.4	--	--
XMW1752	GC-MS	Positive	-	-	176.095	C10H12N2O	-	1467.87	1390	1,4,5,7-Tetramethyl-furo[3,4-d]pyridazine	Heterocyclic compound	-	1000301-21-7	-	59.6	262646	251216	235820	265102	254653	265190	235807	225658	238108	--	--
XMW0728	GC-MS	Positive	-	-	176.12	C12H16O	-	1317.33	1393	Benzenemethanol, 4-methyl-.alpha.-(1-methyl-2-propenyl)-, (R*,R*)-	Alcohol	-	83173-76-6	-	61.7	15137.7	15090.8	13945.2	23487.1	21050.1	22871.3	20782.9	14822.8	16752.5	--	--
XMW2143	GC-MS	Positive	-	-	177.079	C10H11NO2	-	1356.99	1578	7-ethyl-2-methyl-4-benzoxazolol	Heterocyclic compound	-	1000404-74-2	-	66.2	27152	32490.1	35776.4	38344.9	35640.2	37374.5	34028.4	35261.7	37699.4	--	--
NMW0328	GC-MS	Positive	-	-	180.058	C13H8O	-	1480.36	1752	9H-Fluoren-9-one	Aromatics	-	486-25-9	-	60.6	1.94094e+07	18813433	1.7821e+07	2.00745e+07	1.97057e+07	1.94265e+07	1.844e+07	1.71628e+07	1.80189e+07	C06712	ko01100
XMW1983	GC-MS	Positive	-	-	180.079	C10H12O3	-	1461.11	1364	2-Methoxy-5-methylphenol, acetate	Ester	-	1000352-88-0	-	50.7	23808.1	24444.6	27128.2	10014.7	11469.7	10757.6	29048.5	28280.1	32908.7	--	--
XMW1129	GC-MS	Positive	-	-	180.079	C10H12O3	-	1383.19	1421	Ethyl mandelate	Ester	-	774-40-3	-	42.5	44717.7	44555.5	38853.4	47082.1	46063.8	47034	42413.4	40790.3	41521.9	--	--
XMW2656	GC-MS	Positive	-	-	180.115	C11H16O2	-	1400.2	1357	1-butoxy-4-methoxy-Benzene	Aromatics	-	20743-95-7	-	44.4	40443.3	41345	41991.6	49450.3	48547.8	52086.1	40194.3	37263.2	40529.5	--	--
XMW0507	GC-MS	Positive	-	-	180.115	C11H16O2	-	1517.29	1632	1,3-Benzenediol, 5-pentyl-	Phenol	-	500-66-3	-	77.5	332838	320156	295261	355871	325147	317738	313308	374456	472522	--	--
NMW0270	GC-MS	Positive	-	-	182.073	C13H10O	-	1637.31	1635	Benzophenone	Ketone	-	119-61-9	-	72.1	6803.8	11701.6	9043.39	7445.28	7204.15	6684.05	6633.31	6567.17	7364.43	C06354	--
NMW0262	GC-MS	Positive	-	-	184.074	C9H12O4	-	1666.78	1614	Phenol, 3,4,5-trimethoxy-	Phenol	-	642-71-7	-	57.6	36435.1	36089.3	37379.7	33400.3	34493.4	31187.1	45084.6	37484.7	53691.3	C10765	--
NMW0088	GC-MS	Positive	-	-	184.146	C11H20O2	-	1261.21	1220	2-Ethylhexyl acrylate	Ester	-	103-11-7	-	65.4	45782.2	41771.6	41260.5	32784.8	33435.2	33344.9	47477.8	39654.6	45558.4	C19420	--
XMW3345	GC-MS	Positive	-	-	184.219	C13H28	-	1212.15	1251	6-methyl-Dodecane	Hydrocarbons	-	6044-71-9	-	73	6815.01	6257.12	5817.14	6657	6045.69	5271.27	5310.8	6238.82	6099.46	--	--
XMW2539	GC-MS	Positive	-	-	185.985	C4H8ClO4P	-	1407.23	-	Phosphoric acid, 2-chloroethenyl dimethyl ester	Halogenated hydrocarbons	-	17027-41-7	-	71.3	34057.6	23781.8	21608.3	35100.5	20340.4	21813.2	28054.4	23884.9	21481.8	--	--
XMW2316	GC-MS	Positive	-	-	188.047	C11H8O3	-	1522.47	1686	2-acetyl-1,3-Indandione	Ketone	-	1133-72-8	-	60.5	20604.2	19135.4	20938.7	12392.2	11746.6	12114.1	22076.1	22345.9	23976.8	--	--
XMW2514	GC-MS	Positive	-	-	188.157	C14H20	-	1608.96	1523	1,1,4,5,6-Pentamethyl-2,3-dihydro-1H-indene	Aromatics	-	16204-67-4	-	71.9	42270.8	45896.8	50277	38306.9	40420.1	40216	50553.7	52790.2	57413.6	--	--
XMW0174	GC-MS	Positive	-	-	190.099	C12H14O2	-	1363.26	1379	2,2'-Ethylidenebis(5-methylfuran)	Heterocyclic compound	-	3209-79-8	-	78.5	140210	142263	169179	105948	115549	113759	158767	162777	177146	--	--
XMW3672	GC-MS	Positive	-	-	190.136	C13H18O	-	1428.54	1455	1-(4-tert-Butylphenyl)propan-2-one	Ketone	-	81561-77-5	-	80.6	59596.8	57133.4	58387.5	89682.6	82344.7	81282.6	64750.5	62466.7	67546.6	--	--
KMW0526	GC-MS	Positive	-	-	190.136	C13H18O	-	1380.38	1386	2-Buten-1-one, 1-(2,6,6-trimethyl-1,3-cyclohexadien-1-yl)-, (E)-	Terpenoids	-	23726-93-4	-	95.2	664607	612766	586846	471824	464245	464746	626446	604743	634408	--	--
XMW3639	GC-MS	Positive	-	-	190.172	C14H22	-	1314.91	1358	(1-methylheptyl)-Benzene	Aromatics	-	777-22-0	-	58.7	25315.9	26335.9	27658.7	26987.6	25815.9	24865.3	30169.6	28988.6	31819.1	--	--
XMW3266	GC-MS	Positive	-	-	190.172	C14H22	-	1497.88	1360	1,5,5-Trimethyl-6-(3-methyl-buta-1,3-dienyl)-cyclohexene	Hydrocarbons	-	56763-66-7	-	63.6	15349.4	18842.9	22266	2876.2	1860.02	2394.17	28194.3	26173.5	28056.6	--	--
XMW1586	GC-MS	Positive	-	-	190.172	C14H22	-	1578.74	1354	2,3,5,5,8,8-hexamethyl-Cycloocta-1,3,6-triene	Hydrocarbons	-	1000161-97-9	-	66.9	13800.7	11705.8	8455.04	7934.09	7460.35	6712.21	11252.6	11520.3	10997.8	--	--
XMW1095	GC-MS	Positive	-	-	190.172	C14H22	-	1479.92	1558	Benzene, 1,2-diethyl-3,4,5,6-tetramethyl-	Aromatics	-	33884-69-4	-	69.7	118581	120900	122535	115314	113435	111294	127734	134054	135527	--	--
XMW3186	GC-MS	Positive	-	-	192.151	C13H20O	-	1281.8	1352	2,6,10,10-tetramethyl-1-Oxaspiro[4.5]deca-3,6-diene	Hydrocarbons	-	54344-61-5	-	83.4	69169.1	68859.6	64477.9	8954.58	9213.35	9276.14	85517.9	69090.8	80940.6	--	--
XMW2711	GC-MS	Positive	-	-	192.151	C13H20O	-	1284.3	1476	2-(1,1-Dimethylethyl)-6-(1-methylethyl)phenol	Phenol	-	22791-95-3	-	80.7	8759.16	8027.89	7627.49	9	9	9	9491.99	9927.95	10020.1	--	--
WMW0051	GC-MS	Positive	-	-	192.151	C13H20O	-	1432.63	1491	3-Buten-2-one, 4-(2,6,6-trimethyl-1-cyclohexen-1-yl)-	Terpenoids	-	14901-07-6	-	78.6	185512	174750	178166	222942	212471	233182	148816	165861	169627	--	--
XMW0211	GC-MS	Positive	-	-	192.163	C12H20N2	-	1410.25	1757	3-Pentyl-4,5,6,7-tetrahydro-1H-indazole	Heterocyclic compound	-	22122-91-4	-	41.8	18034.3	18158.8	15133.3	17368.7	16185	18140.3	19058.6	17575.3	18832.2	--	--
XMW1155	GC-MS	Positive	-	-	194.11	C15H14	-	1481.6	1720	9H-Fluorene, 1,9-dimethyl-	Aromatics	-	17057-98-6	-	54.7	6.88594e+06	6.60702e+06	6.29452e+06	7.06045e+06	7.17617e+06	6.87968e+06	6.03582e+06	5.96193e+06	6.22327e+06	--	--
XMW3111	GC-MS	Positive	-	-	194.131	C12H18O2	-	1221.62	1437	4-acetyl-2,3,4,5,5-pentamethyl-2-Cyclopenten-1-one	Ketone	-	50506-59-7	-	78.2	38309.6	35801.8	34960.6	38431.6	37734.6	34567.6	41912.6	31883.9	39408	--	--
KMW0547	GC-MS	Positive	-	-	194.131	C12H18O2	-	1628.89	1411	2-Cyclohexen-1-ol, 2-methyl-5-(1-methylethenyl)-, acetate	Ester	-	97-42-7	-	55.4	109391	105330	91849.7	111494	119958	103407	74875.4	90518.2	85306.4	--	--
WMW0049	GC-MS	Positive	-	-	194.167	C13H22O	-	1445.86	1435	5,9-Undecadien-2-one, 6,10-dimethyl-, (Z)-	Ketone	-	3879-26-3	-	95.3	815965	798692	792346	639792	581880	610837	1.1247e+06	996771	1.22642e+06	--	--
D443	GC-MS	Positive	-	-	196.11	C11H16O3	-	1160.24	1406	2-Furancarboxylic acid, hexyl ester	Ester	-	39251-86-0	-	61.9	7.74145e+06	7.08462e+06	7.05613e+06	6.89194e+06	7.00055e+06	6.7728e+06	7.02169e+06	6.16942e+06	6.8396e+06	--	--
XMW1179	GC-MS	Positive	-	-	198.058	C8H16Cl2O	-	1471.78	1343	Butane, 1,1'-oxybis[4-chloro-	Halogenated hydrocarbons	-	6334-96-9	-	56.7	31986	25465.4	24624.1	21630.8	24722.5	20803.3	22488.8	20957.4	21136	--	--
KMW0598	GC-MS	Positive	-	-	198.198	C13H26O	-	1509.35	1503	Tridecanal	Aldehyde	-	10486-19-8	-	87.1	21866.5	21716.4	20721.2	20858.7	17741.1	19844.8	26247.6	25653.9	23954.5	--	--
XMW0110	GC-MS	Positive	-	-	198.235	C14H30	-	1273.95	1285	Dodecane, 4,6-dimethyl-	Hydrocarbons	-	61141-72-8	-	84.5	24006.7	24262.1	19624.4	21220.5	22855.4	22903.1	21553.9	17264.2	20524.8	--	--
KMW0551	GC-MS	Positive	-	-	198.235	C14H30	-	1398.88	1400	Tetradecane	Hydrocarbons	-	629-59-4	-	82.1	88578.6	103045	100997	91795.2	94779.1	81769	94447.5	88315.8	89718.1	--	--
KMW0633	GC-MS	Positive	-	-	200.214	C13H28O	-	1792.54	1593	n-Tridecan-1-ol	Alcohol	-	112-70-9	-	82.7	3418.06	5558.91	4663.66	3934.09	3880.72	2336.59	4135.82	4928.04	3307.23	C14509	--
XMW0552	GC-MS	Positive	-	-	204.115	C13H16O2	-	1589.02	1458	2,2'-Isopropylidenebis(5-methylfuran)	Heterocyclic compound	-	59212-75-8	-	62.4	12188.8	9834.68	12512	5592.66	5528.63	5438.19	9195.22	10806.5	10392.6	--	--
XMW2369	GC-MS	Positive	-	-	204.136	C10H20O4	-	1169.34	1366	2-(2-butoxyethoxy)-Ethanol,acetate	Ester	-	124-17-4	-	72.6	2.92032e+06	2.6952e+06	2.64025e+06	2.47427e+06	2.5391e+06	2.46732e+06	2.68104e+06	2.30355e+06	2.60173e+06	--	--
XMW0314	GC-MS	Positive	-	-	204.188	C15H24	-	1560.14	1431	Elemene isomer	Terpenoids	-	1000414-93-6	-	64.6	5235.45	5268.48	3847.65	4301.52	4833.53	4136.1	7545.49	5893.39	5670.04	--	--
KMW0573	GC-MS	Positive	-	-	204.188	C15H24	-	1451.6	1445	(E)-.beta.-Famesene	Terpenoids	-	18794-84-8	-	54.4	8776.62	8897.12	9396.22	6621.96	4734.76	5476.62	12190.7	13228.9	13242	C09666	ko00909
XMW2020	GC-MS	Positive	-	-	206.131	C13H18O2	-	1525.43	-	2-tert-Butyl-6-methylphenol, acetate	Ester	-	1000364-92-4	-	52	17818	17009.7	14248.6	4653.38	4872.43	4995.51	21305.2	20340	22648.6	--	--
KMW0662	GC-MS	Positive	-	-	206.131	C13H18O2	-	1665.47	1665	4-Oxo-β-ionone	Terpenoids	-	29790-29-2	-	81.4	33136.7	35877.4	36443.7	11664.8	10757.4	12393	41403.8	46276.5	44957.3	--	--
XMW1984	GC-MS	Positive	-	-	208.074	C11H12O4	-	1442.21	1654	2'-Hydroxy-4'-methoxyacetophenone, acetate	Ketone	-	1000352-92-9	-	64.3	89407	82875.8	82746.9	69877.4	69486.9	49050.2	137551	136105	82946	--	--
XMW1740	GC-MS	Positive	-	-	208.103	C9H18FO2P	-	1564.94	1394	Cyclohexyl propylphosphonofluoridate	Ester	-	1000298-44-1	-	71.9	2.13487e+06	2.46268e+06	2.75494e+06	2.24838e+06	2.36633e+06	2.22113e+06	3.18682e+06	3.09837e+06	3.73938e+06	--	--
NMW0275	GC-MS	Positive	-	-	208.11	C12H16O3	-	1612.82	1645	Isoelemicin	Aromatics	-	487-12-7	-	61.5	25910.3	25355.8	24274.2	16336.7	16894.6	15905.5	25928.3	28337.5	30230.1	C16975	--
XMW0593	GC-MS	Positive	-	-	208.113	C9H20O3S	-	1702.79	1475	Sulfurous acid, isobutyl pentyl ester	Ester	-	1000309-13-8	-	61.8	9031.04	12453.7	9789.03	7137.24	6882.61	7819.3	7826.07	7492.3	9478.52	--	--
XMW3627	GC-MS	Positive	-	-	208.125	C16H16	-	1755.69	1749	cis-1,1'-(1,2-cyclobutanediyl)bis-Benzene	Aromatics	-	7694-30-6	-	81.1	25958.8	24948.8	23689.9	30173.6	29682.3	30860.1	22007.5	23858.4	23602.4	--	--
XMW0133	GC-MS	Positive	-	-	208.146	C13H20O2	-	1416.15	1479	6-Methyl-6-(5-methylfuran-2-yl)heptan-2-one	Ketone	-	50464-95-4	-	69.8	31068.5	28843.2	30405.6	20644.3	19041.6	20217.4	33008.8	31781.6	32040.3	--	--
XMW3265	GC-MS	Positive	-	-	208.183	C14H24O	-	1646.79	1484	2-Methyl-4-(2,6,6-trimethylcyclohex-2-enyl)but-3-en-2-ol	Alcohol	-	56763-65-6	-	52	1.3797e+06	1.29295e+06	1.14524e+06	1.35046e+06	1.44106e+06	1.26349e+06	954105	1.14944e+06	1.07176e+06	--	--
XMW2435	GC-MS	Positive	-	-	210.198	C14H26O	-	1675	1416	2,6,10-trimethyl-9-Undecenal	Aldehyde	-	141-13-9	-	73.9	185798	190507	194323	197625	192802	191250	181982	195849	190128	--	--
KMW0640	GC-MS	Positive	-	-	212.214	C14H28O	-	1613.49	1613	Tetradecanal	Aldehyde	-	124-25-4	-	95.7	73226	67843.6	65613.3	51137.2	47590.1	49131.4	79144.8	84836.4	78980.5	--	--
KMW0602	GC-MS	Positive	-	-	212.25	C15H32	-	1498.66	1500	Pentadecane	Hydrocarbons	-	629-62-9	-	85.8	40432.3	64313.2	52984.2	43640.5	39865.7	40032.3	45531.4	45992.6	44138.5	C08388	--
XMW3632	GC-MS	Positive	-	-	215.189	C12H25NO2	-	1627.64	1857	N-(2-hydroxyethyl)-Decanamide	Amine	-	7726-08-1	-	48.3	108658	122897	120373	119214	113603	119355	111736	111760	114735	--	--
XMW0554	GC-MS	Positive	-	-	219.191	C12H22BN3	-	1419.67	-	Boron, [3-imino-2-(1-iminoethyl)butanenitrilato-N2,N3]dipropyl-, (t-4)-	Other	-	136704-96-6	-	50.8	5956.71	5892.59	4792.14	12954.7	9735.05	9316.59	6401.39	7120.13	6123.77	--	--
NMW0283	GC-MS	Positive	-	-	220.11	C13H16O3	-	1503	1658	2H-1-Benzopyran, 6,7-dimethoxy-2,2-dimethyl-	Aromatics	-	644-06-4	-	61.8	37348.4	38044.2	35226.7	30768	31888.7	31674.3	37549.1	33302.6	35961.1	C09018	--
XMW1040	GC-MS	Positive	-	-	221.069	C11H11NO4	-	1450.39	1778	3-Methylbut-2-enoic acid, 4-nitrophenyl ester	Ester	-	1000307-59-8	-	69.4	5692.97	5892.17	4380.55	4222.27	5134.12	3147.73	4977.22	4958.56	5510.66	--	--
XMW0627	GC-MS	Positive	-	-	222.089	C12H14O4	-	1383.38	1594	Diethyl Phthalate	Ester	-	84-66-2	-	45.9	64742.6	62833.6	57077.4	65557.7	62010.1	60969	61472.8	55647.9	58015.8	C14175	--
XMW3726	GC-MS	Positive	-	-	222.162	C14H22O2	-	1717.11	1823	2,5-bis(1,1-dimethylethyl)-1,4-Benzenediol	Phenol	-	88-58-4	-	43.3	10787	10349.2	9611.66	10256.1	8350.04	8484.71	11214.4	11736.4	11371.8	--	--
XMW3306	GC-MS	Positive	-	-	222.198	C15H26O	-	1426.36	1399	Dihydro-cis-.alpha.-copaene-8-ol	Terpenoids	-	58569-27-0	-	52.5	10775.1	8725.49	10207.8	15986.9	17401.2	17845	12780.7	12209.8	11685.7	--	--
XMW0960	GC-MS	Positive	-	-	224.105	C12H16O4	-	1627.66	1602	Fumaric acid, dicyclobutyl ester	Ester	-	1000345-04-6	-	41.5	109421	122897	120373	119214	113603	119355	111736	111760	114735	--	--
XMW2569	GC-MS	Positive	-	-	224.25	C16H32	-	1767.13	1656	decyl-Cyclohexane	Hydrocarbons	-	1795-16-0	-	55.3	4757.23	6746.39	7731.63	7355.93	7705.72	5055.16	5763.01	6878.71	5897.91	--	--
NMW0334	GC-MS	Positive	-	-	226.132	C11H18N2O3	-	1428.43	1761	Pentobarbital	Heterocyclic compound	-	76-74-4	-	46.9	46340.2	41519.5	40885.3	66612.6	59900	59818.9	47542.8	45007.4	49803.7	C07422	--
KMW0682	GC-MS	Positive	-	-	226.23	C15H30O	-	1715	1711	Pentadecanal	Aldehyde	-	2765-11-9	-	97.6	114451	105670	102808	81906.2	77063.2	77091.4	127500	128541	120544	C01948	--
KMW0642	GC-MS	Positive	-	-	226.266	C16H34	-	1598.62	1600	Hexadecane	Hydrocarbons	-	544-76-3	-	93.9	38515.4	61339.3	59336.2	47310	46095.6	41375.6	47828.4	46470.8	46393.4	--	--
XMW2724	GC-MS	Positive	-	-	232.074	C13H12O4	-	1623.32	1880	1,1'-(6-methoxy-2,5-benzofurandiyl)bis-Ethanone	Heterocyclic compound	-	23840-15-5	-	61.2	4847.96	5662.01	6793.98	6212.21	5405.56	4922.05	12786.7	7393.41	5522.34	--	--
XMW1415	GC-MS	Positive	-	-	234.117	C13H15FN2O	-	1376.69	1717	1H-Pyrazole, 1-[2-(4-fluorophenoxy)ethyl]-3,5-dimethyl-	Halogenated hydrocarbons	-	1000302-33-6	-	45.5	9528.24	9998.71	9966.5	20639.6	17380.8	16592.8	9737.92	8475.31	9039.49	--	--
XMW2987	GC-MS	Positive	-	-	234.119	C13H18N2S	-	1761.81	2066	N-(2,6-Dimethylphenyl)-N-[(2E)-3-methyl-1,3-thiazinan-2-ylidene]amine	Heterocyclic compound	-	40202-12-8	-	53.7	4194.16	3880.32	3606.39	4569.2	3948.12	3806.9	3910.16	4438.22	4047.87	--	--
WMW0119	GC-MS	Positive	-	-	234.162	C15H22O2	-	1709.08	1735	Benzoic acid, 2-ethylhexyl ester	Ester	-	5444-75-7	-	43.7	4859.63	6161.98	5171.02	7044.8	6689.07	5486.66	5739.17	5762.45	5514.06	--	--
KMW0683	GC-MS	Positive	-	-	240.282	C17H36	-	1698.79	1700	Heptadecane	Hydrocarbons	-	629-78-7	-	89.3	37827.5	47742.7	42313.7	44767	40894.1	38171.7	33059.5	33343.1	35231.5	C01816	--
XMW0778	GC-MS	Positive	-	-	242.152	C13H22O4	-	1087.65	1090	Ethyl 2-(5-methyl-5-vinyltetrahydrofuran-2-yl)propan-2-yl carbonate	Heterocyclic compound	-	1000373-80-3	-	61.9	34297.1	31677.1	32732	28770.9	29821.1	30170.1	32198.8	25662.8	31898	--	--
XMW2737	GC-MS	Positive	-	-	242.261	C16H34O	-	1728.78	1504	2-hexyl-1-Decanol	Alcohol	-	2425-77-6	-	85.1	70966.4	73558.8	66921.2	59850.4	54808.3	56064	71034.9	79700.7	78174.5	--	--
w04	GC-MS	Positive	-	-	248.214	C17H28O	-	1993.7	1933	4,8,12-Tetradecatrienal, 5,9,13-trimethyl-	Heterocyclic compound	-	66408-55-7	-	64.6	12507.4	12458.5	11999.7	10070.1	8702.45	8159.11	21051.5	19232.2	22653.7	--	--
XMW3153	GC-MS	Positive	-	-	248.25	C18H32	-	1399.56	1598	1,3-Dimethyl-5-n-hexyladamantane	Hydrocarbons	-	52873-50-4	-	70.5	517663	496682	480421	173418	173299	173960	537305	593673	589817	--	--
XMW0859	GC-MS	Positive	-	-	251.152	C14H21NO3	-	1681.64	1950	Phenol, 2,4-di-t-butyl-6-nitro-	Phenol	-	20039-94-5	-	63.5	7616.75	7647.13	7704.13	7764.73	7698.96	7767.18	7737.96	8455.89	8080.17	--	--
XMW0261	GC-MS	Positive	-	-	254.297	C18H38	-	1765.29	1765	Heptadecane, 2-methyl-	Hydrocarbons	-	1560-89-0	-	75.3	6397.57	9156.24	8456.68	8125.7	6930.08	8021.36	6884.84	7726.99	8528.01	--	--
KMW0718	GC-MS	Positive	-	-	262.23	C18H30O	-	1910.81	2015	5,9,13-Pentadecatrien-2-one, 6,10,14-trimethyl-, (E,E)-	Ketone	-	1117-52-8	-	91.4	132442	139086	127043	110993	107144	103796	210287	205160	224289	--	--
KMW0692	GC-MS	Positive	-	-	268.277	C18H36O	-	1841.81	1770	2-Pentadecanone, 6,10,14-trimethyl-	Ketone	-	502-69-2	-	89.2	66907	65971.4	64955.8	77365.8	80777.3	84097.9	63428.4	69411.3	66340.3	--	--
WMW0224	GC-MS	Positive	-	-	270.256	C17H34O2	-	1822.07	1827	Isopropyl myristate	Ester	-	110-27-0	-	66.6	8130.08	8175.24	11247.4	16145	15875.3	15599.8	8381.05	8648.55	9246.74	--	--
XMW1898	GC-MS	Positive	-	-	276.136	C16H20O4	-	1651.61	1937	O-(3-methylbut-2-enoyl)-O'-(pivaloyl)-1,2-Benzenediol	Aromatics	-	1000329-79-2	-	46.3	29298.6	26422.3	22861.6	29404.6	33489.7	26102.5	14711.7	19252.2	20092.5	--	--
XMW1812	GC-MS	Positive	-	-	279.236	C18H30FN	-	1586.27	1911	N-decyl-N-methyl-4-FluorobenzylAmine	Amine	-	1000310-48-1	-	58.3	23069.8	21755.2	23647	30002.3	28997.1	31135.1	24806.3	25546.2	25383.2	--	--
XMW0134	GC-MS	Positive	-	-	282.329	C20H42	-	1740.19	1753	Hexadecane, 2,6,11,15-tetramethyl-	Hydrocarbons	-	504-44-9	-	75.6	23639.7	26694.5	20967.2	21826.3	19082.1	20249.8	33337.5	32622.5	36135.3	--	--
XMW3112	GC-MS	Positive	-	-	296.308	C20H40O	-	1947	1948	Isophytol	Terpenoids	-	505-32-8	-	76.9	37137.2	35655.1	31214.3	17233.3	23773.4	19153	59301	51562.5	48032.4	--	--
XMW2477	GC-MS	Positive	-	-	296.308	C20H40O	-	2112.88	2114	Phytol	Terpenoids	-	150-86-7	-	70.5	16609.7	14185.7	10061.4	6224.53	9955.51	8198.56	22268.2	21178.6	19825.9	C01389	--
KMW0716	GC-MS	Positive	-	-	298.287	C19H38O2	-	2021	2010	Isopropyl palmitate	Ester	-	142-91-6	-	74.6	16450.3	16456.1	22354	32721.5	34873.2	35312.8	15928.9	15729.8	18133.3	--	--
XMW2291	GC-MS	Positive	-	-	312.303	C20H40O2	-	2183.49	2188	Hexadecanoic acid, butyl ester	Ester	-	111-06-8	-	60.8	8614.09	5427.95	8029.43	4702.22	7185.27	13863.3	10356.9	3414.51	8950.09	--	--
XMW1496	GC-MS	Positive	-	-	320.199	C19H28O4	-	1860.99	2085	Phthalic acid, hept-4-yl isobutyl ester	Ester	-	1000356-78-3	-	72.3	26226.4	29457.2	28113.6	24320.3	25854	24715.7	25240.3	27211.1	25923.5	--	--
XMW1960	GC-MS	Positive	-	-	334.102	C18H16F2O4	-	1907.39	2347	Isophthalic acid, butyl 3,5-difluorophenyl ester	Ester	-	1000344-37-0	-	49.9	6344.75	6526.11	6139.96	6995.81	5951.06	5311.7	16928.4	8510.11	6509.69	--	--
XMW0426	GC-MS	Positive	-	-	338.318	C22H42O2	-	1837.03	2168	Phytol, acetate	Alcohol	-	1000375-01-4	-	95	126006	170141	194274	85254.3	107304	92822.9	271080	269051	259716	--	--
XMW1794	GC-MS	Positive	-	-	348.27	C19H40O3S	-	2199.75	2469	Sulfurous acid, 2-ethylhexyl undecyl ester	Ester	-	1000309-19-4	-	80.1	8763.46	12266.4	9245.11	8342.54	7751.29	6921.57	10979.8	13479.7	10452.2	--	--
XMW1312	GC-MS	Positive	-	-	355.158	C20H28CoN2	-	1691.39	-	Cobalt, bis(.eta.-5-piperidinylcyclopentadienyl)-	Heterocyclic compound	-	1000162-04-6	-	62.7	7002.78	10834.7	10914.4	11709.2	16266.9	16112.2	21059.8	13373.8	17462.8	--	--
XMW2122	GC-MS	Positive	-	-	401.178	C29H23NO	-	1531.08	-	4-fluoro-3-nitro-benzoic acid, 2,4-bis(1,1-dimethylpropyl)phenyl ester	Ester	-	1000398-95-7	-	63.9	16418.3	14673.2	16221.9	12078.1	14879.3	13650.8	22272.7	11944.8	13007.2	--	--
