# Supplementary material for: Integrated transcriptomic and metabolomic analyses reveal flavonoid and lipid metabolic reprogramming in Dendrobiumofficinale during Colletotrichum fructicola-induced anthracnose
Source: PeerJ. 2026 Jan 15;14:e20563. doi: 10.7717/peerj.20563 (PMC12812277; doi:10.7717/peerj.20563)
Supplement: Supplemental Information 4 — RNA sequencing yielded high-quality clean reads ranging from 20.13 Gb to 21.89 Gb across all samples. [file peerj-14-20563-s004.xlsx]

## Sheet: Sheet1
ID	CK1	CK2	CK3	IN1	IN2	IN3	chr	start	end	strand	gene_name	gene_description	KEGG	KEGG pathway	NR	Swissprot	Tremble	KOG	GO	Pfam
gene-DDH38_pgr001	13	3	12	0	7	46	NC_037361.1	133193	134682	+	rrn16S	--	--	--	--	--	--	--	--	--
gene-DDH38_pgr002	15	3	33	4	42	122	NC_037361.1	127984	130790	+	rrn23S	--	--	--	--	--	--	--	--	--
gene-DDH38_pgr006	0	0	0	0	0	1	NC_037361.1	109395	109497	-	rrn4.5S	--	--	--	--	--	--	--	--	--
gene-DDH38_pgr007	31	10	59	16	81	202	NC_037361.1	106490	109296	-	rrn23S	--	--	--	--	--	--	--	--	--
gene-DDH38_pgr008	33	1	27	4	38	125	NC_037361.1	102598	104087	-	rrn16S	--	--	--	--	--	--	--	--	--
gene-DDH38_pgt001	0	0	0	3	0	0	NC_037361.1	6907	6978	-	trnQ-TTG	--	--	--	--	--	--	--	--	--
gene-DDH38_pgt002	0	0	1	1	1	3	NC_037361.1	8299	8386	-	trnS-GCT	--	--	--	--	--	--	--	--	--
gene-DDH38_pgt003	1	3	1	0	0	4	NC_037361.1	10248	10319	+	trnR-TCT	--	--	--	--	--	--	--	--	--
gene-DDH38_pgt004	0	0	0	1	0	0	NC_037361.1	28173	28243	+	trnC-GCA	--	--	--	--	--	--	--	--	--
gene-DDH38_pgt009	18	17	11	30	17	6	NC_037361.1	35871	35963	-	trnS-TGA	--	--	--	--	--	--	--	--	--
gene-DDH38_pgt013	1	0	0	0	0	0	NC_037361.1	46623	46695	-	trnT-TGT	--	--	--	--	--	--	--	--	--
gene-DDH38_pgt014	6	10	1	2	0	0	NC_037361.1	47380	48262	+	trnL-TAA	--	--	--	--	--	--	--	--	--
gene-DDH38_pgt015	11	0	2	1	2	0	NC_037361.1	48647	48719	+	trnF-GAA	--	--	--	--	--	--	--	--	--
gene-DDH38_pgt016	2	1	0	0	0	4	NC_037361.1	50593	51249	-	trnV-TAC	--	--	--	--	--	--	--	--	--
gene-DDH38_pgt017	1	0	0	2	0	0	NC_037361.1	51425	51497	+	trnM-CAT	--	--	--	--	--	--	--	--	--
gene-DDH38_pgt020	5	3	0	0	4	0	NC_037361.1	85742	85816	+	trnH-GTG	--	--	--	--	--	--	--	--	--
gene-DDH38_pgt024	0	0	2	0	1	2	NC_037361.1	104390	105406	+	trnI-GAT	--	--	--	--	--	--	--	--	--
gene-DDH38_pgt025	0	0	0	0	0	2	NC_037361.1	105471	106344	+	trnA-TGC	--	--	--	--	--	--	--	--	--
gene-DDH38_pgt030	0	0	0	0	0	1	NC_037361.1	127142	127215	-	trnR-ACG	--	--	--	--	--	--	--	--	--
gene-DDH38_pgt031	0	0	2	0	0	0	NC_037361.1	130936	131809	-	trnA	--	--	--	--	--	--	--	--	--
gene-DDH38_pgt032	1	0	2	0	1	0	NC_037361.1	131874	132890	-	trnI-GAT	--	--	--	--	--	--	--	--	--
gene-LOC110091778	1	2	4	1	0	0	NW_021591871.1	991	2275	+	LOC110091778	--	K14399 polyribonucleotide 5'-hydroxyl-kinase [EC:2.7.1.78] | (RefSeq) Clp1-domain-containing protein (A)	ko03015: mRNA surveillance pathway	random slug protein 5-like [Dendrobium catenatum]	RecName: Full=Phosphatidylinositol/phosphatidylcholine transfer protein SFH8; AltName: Full=Protein SEC FOURTEEN HOMOLOGS 8; Short=AtSFH8;	SubName: Full=Uncharacterized protein {ECO:0000313|EMBL:PKU59151.1};	Phosphatidylinositol transfer protein PDR16 and related proteins	GO:0000139,Golgi membrane; GO:0005886,plasma membrane; GO:0015031,protein transport	PF00650.20:CRAL/TRIO domain
gene-LOC110091779	816	872	1049	955	1205	846	NW_021319097.1	156377	220373	+	LOC110091779	--	K19787 carnosine N-methyltransferase [EC:2.1.1.22] | (RefSeq) carnosine N-methyltransferase (A)	ko00340: Histidine metabolism	carnosine N-methyltransferase [Dendrobium catenatum]	--	SubName: Full=Uncharacterized protein {ECO:0000313|EMBL:PKU78404.1};	Putative trehalase	--	PF07942.12:N2227-like protein
gene-LOC110091781	364	302	485	311	321	197	NW_021430753.1	9555	12436	-	LOC110091781	--	K17710 pentatricopeptide repeat domain-containing protein 1 | (RefSeq) LOW QUALITY PROTEIN: putative pentatricopeptide repeat-containing protein At2g02150 (A)	--	Pentatricopeptide repeat-containing protein [Dendrobium catenatum]	RecName: Full=Pentatricopeptide repeat-containing protein At1g61870, mitochondrial; AltName: Full=Protein PENTATRICOPEPTIDE REPEAT 336; Flags: Precursor;	SubName: Full=Pentatricopeptide repeat-containing protein {ECO:0000313|EMBL:PKU61302.1};	FOG: PPR repeat	GO:0016020,membrane; GO:0005743,mitochondrial inner membrane; GO:0005739,mitochondrion; GO:0004519,endonuclease activity; GO:0000166,nucleotide binding; GO:0003723,RNA binding; GO:0009451,RNA modification	PF13041.6:PPR repeat family
gene-LOC110091782	616	566	845	1125	1198	1119	NW_021430753.1	59395	63705	-	LOC110091782	--	K00430 peroxidase [EC:1.11.1.7] | (RefSeq) peroxidase 42-like (A)	ko00940: Phenylpropanoid biosynthesis	peroxidase 42-like [Dendrobium catenatum]	RecName: Full=Peroxidase 42; Short=Atperox P42; EC=1.11.1.7; AltName: Full=ATP1a/ATP1b; AltName: Full=PRXR1; Flags: Precursor;	SubName: Full=Peroxidase 42 {ECO:0000313|EMBL:PKU61306.1};	--	GO:0005576,extracellular region; GO:0009505,plant-type cell wall; GO:0009506,plasmodesma; GO:0020037,heme binding; GO:0046872,metal ion binding; GO:0004601,peroxidase activity; GO:0042744,hydrogen peroxide catabolic process; GO:0009664,plant-type cell wall organization; GO:0006979,response to oxidative stress; GO:0048511,rhythmic process	PF00141.23:Peroxidase
gene-LOC110091784	2700	2292	2773	2396	3204	2661	NW_021430753.1	194970	197366	-	LOC110091784	--	K14494 DELLA protein | (RefSeq) DELLA protein SLN1-like (A)	ko04075: Plant hormone signal transduction	DELLA protein SLN1-like [Dendrobium catenatum]	RecName: Full=DELLA protein RHT-1; AltName: Full=Protein Rht-B1/Rht-D1; AltName: Full=Reduced height protein 1;	SubName: Full=DELLA protein DWARF8 {ECO:0000313|EMBL:PKU61315.1};	--	GO:0005634,nucleus; GO:0000989,NA; GO:0009740,gibberellic acid mediated signaling pathway; GO:0006355,regulation of transcription, DNA-templated; GO:0006351,transcription, DNA-templated	PF03514.14:GRAS domain family
gene-LOC110091785	398	410	366	684	1006	926	NW_021430753.1	151904	170480	+	LOC110091785	--	K20855 beta-1,3-galactosyltransferase 1/2/3/4/5/7/8 [EC:2.4.1.-] | (RefSeq) probable beta-1,3-galactosyltransferase 2 (A)	--	probable beta-1,3-galactosyltransferase 2 [Dendrobium catenatum]	RecName: Full=Probable beta-1,3-galactosyltransferase 2; EC=2.4.1.-;	SubName: Full=Putative beta-1,3-galactosyltransferase 2 {ECO:0000313|EMBL:PKU61314.1};	Galactosyltransferases	GO:0005794,Golgi apparatus; GO:0000139,Golgi membrane; GO:0016021,integral component of membrane; GO:0008378,galactosyltransferase activity; GO:0006486,protein glycosylation	PF01762.21:Galactosyltransferase
gene-LOC110091786	1	3	8	11	22	18	NW_021430753.1	75447	76314	-	LOC110091786	--	K10664 E3 ubiquitin-protein ligase ATL6/9/15/31/42/55 [EC:2.3.2.27] | (RAP-DB) Os02g0759400; Zinc finger, RING/FYVE/PHD-type domain containing protein. (A)	--	RING-H2 finger protein ATL32-like [Dendrobium catenatum]	RecName: Full=RING-H2 finger protein ATL32; EC=2.3.2.27 {ECO:0000305}; AltName: Full=RING-type E3 ubiquitin transferase ATL32 {ECO:0000305}; Flags: Precursor;	SubName: Full=RING-H2 finger protein ATL32 {ECO:0000313|EMBL:PKU61309.1};	FOG: Predicted E3 ubiquitin ligase	GO:0016021,integral component of membrane; GO:0046872,metal ion binding; GO:0061630,ubiquitin protein ligase activity; GO:0043161,proteasome-mediated ubiquitin-dependent protein catabolic process	PF13639.6:Ring finger domain
gene-LOC110091787	6	4	1	2	4	0	NW_021319083.1	2460269	2489325	-	LOC110091787	--	K13415 protein brassinosteroid insensitive 1 [EC:2.7.10.1 2.7.11.1] | (RefSeq) uncharacterized protein LOC103413440 isoform X1 (A)	ko04075: Plant hormone signal transduction	squamosa promoter-binding-like protein 7 [Dendrobium catenatum]	RecName: Full=Squamosa promoter-binding-like protein 7;	SubName: Full=Squamosa promoter-binding-like protein 7 {ECO:0000313|EMBL:PKU78747.1};	--	GO:0005634,nucleus; GO:0003677,DNA binding; GO:0046872,metal ion binding; GO:0006355,regulation of transcription, DNA-templated; GO:0006351,transcription, DNA-templated	PF03110.14:SBP domain
gene-LOC110091788	2502	2271	3277	2674	3293	2680	NW_021318852.1	562058	565982	+	LOC110091788	--	K03257 translation initiation factor 4A | (RefSeq) eukaryotic initiation factor 4A-3-like (A)	ko03013: RNA transport	eukaryotic initiation factor 4A-3-like [Dendrobium catenatum]	RecName: Full=Eukaryotic initiation factor 4A-3; Short=eIF-4A-3; EC=3.6.4.13; AltName: Full=ATP-dependent RNA helicase eIF4A-3; AltName: Full=DEAD-box ATP-dependent RNA helicase 23; AltName: Full=eIF4A-2;	SubName: Full=Eukaryotic initiation factor 4A-3 {ECO:0000313|EMBL:PKU81793.1};	Translation initiation factor 4F, helicase subunit (eIF-4A) and related helicases	GO:0005737,cytoplasm; GO:0005730,nucleolus; GO:0005634,nucleus; GO:0005524,ATP binding; GO:0004004,ATP-dependent RNA helicase activity; GO:0003743,translation initiation factor activity; GO:0010468,regulation of gene expression; GO:0010501,RNA secondary structure unwinding; GO:0006413,translational initiation	PF00270.29:DEAD/DEAH box helicase
gene-LOC110091789	90	44	101	8	9	12	NW_021318852.1	568339	569022	+	LOC110091789	--	K05770 translocator protein | (RefSeq) translocator protein homolog (A)	--	translocator protein homolog [Dendrobium catenatum]	RecName: Full=Translocator protein homolog; Short=AtTSPO;	SubName: Full=Translocator protein like {ECO:0000313|EMBL:PKU81794.1};	--	GO:0031969,chloroplast membrane; GO:0005783,endoplasmic reticulum; GO:0005789,endoplasmic reticulum membrane; GO:0005794,Golgi apparatus; GO:0000139,Golgi membrane; GO:0005795,Golgi stack; GO:0016021,integral component of membrane; GO:0016020,membrane; GO:0020037,heme binding; GO:0006778,porphyrin-containing compound metabolic process; GO:0009737,response to abscisic acid; GO:0006970,response to …	PF03073.15:TspO/MBR family
gene-LOC110091793	8	12	4	0	12	0	NW_021318565.1	363970	370844	+	LOC110091793	--	K14431 transcription factor TGA | (RefSeq) bZIP transcription factor TGA10-like isoform X1 (A)	ko04075: Plant hormone signal transduction	bZIP transcription factor TGA10-like isoform X1 [Dendrobium catenatum]	RecName: Full=bZIP transcription factor TGA10 {ECO:0000303|PubMed:12777042}; AltName: Full=Protein TGACG (TGA) motif-binding protein 10 {ECO:0000303|PubMed:12777042};	SubName: Full=Transcription factor HBP-1b(C38) {ECO:0000313|EMBL:PKU86788.1};	--	GO:0005634,nucleus; GO:0003700,DNA-binding transcription factor activity; GO:0043565,sequence-specific DNA binding; GO:0045893,positive regulation of transcription, DNA-templated; GO:0009733,response to auxin; GO:0009753,response to jasmonic acid; GO:0009751,response to salicylic acid; GO:0006351,transcription, DNA-templated	PF14144.6:Seed dormancy control
gene-LOC110091794	87	92	109	426	266	103	NW_021319523.1	1473618	1479929	-	LOC110091794	--	K13457 disease resistance protein RPM1 | (RefSeq) LOW QUALITY PROTEIN: disease resistance protein RGA5-like (A)	ko04626: Plant-pathogen interaction	LOW QUALITY PROTEIN: putative disease resistance RPP13-like protein 3 [Dendrobium catenatum]	RecName: Full=Disease resistance protein RPP13; AltName: Full=Resistance to Peronospora parasitica protein 13;	SubName: Full=Disease resistance protein RPP13 {ECO:0000313|EMBL:PKU78940.1};	Apoptotic ATPase	GO:0005737,cytoplasm; GO:0005886,plasma membrane; GO:0043531,ADP binding; GO:0005524,ATP binding; GO:0009814,defense response, incompatible interaction; GO:0009626,plant-type hypersensitive response; GO:0007165,signal transduction	PF00931.22:NB-ARC domain
gene-LOC110091796	32	18	44	20	47	6	NW_021319083.1	3030400	3037542	+	LOC110091796	--	K10999 cellulose synthase A [EC:2.4.1.12] | (RefSeq) cellulose synthase A catalytic subunit 9 [UDP-forming] (A)	--	cellulose synthase A catalytic subunit 9 [UDP-forming]	RecName: Full=Cellulose synthase A catalytic subunit 9 [UDP-forming]; EC=2.4.1.12; AltName: Full=OsCesA9;	SubName: Full=Cellulose synthase A catalytic subunit 9 [UDP-forming] {ECO:0000313|EMBL:PKU78757.1};	--	GO:0010330,cellulose synthase complex; GO:0009507,chloroplast; GO:0005794,Golgi apparatus; GO:0016021,integral component of membrane; GO:0005886,plasma membrane; GO:0016760,cellulose synthase (UDP-forming) activity; GO:0016759,cellulose synthase activity; GO:0046872,metal ion binding; GO:0030244,cellulose biosynthetic process; GO:0009833,plant-type primary cell wall biogenesis; GO:0009834,plant-t…	PF03552.14:Cellulose synthase
gene-LOC110091798	194	206	221	696	877	536	NW_021318595.1	6725123	6734273	+	LOC110091798	--	--	--	--	--	--	--	--	--
gene-LOC110091799	1117	975	1246	345	610	336	NW_021318595.1	6663138	6696117	+	LOC110091799	--	K13519 lysophospholipid acyltransferase [EC:2.3.1.51 2.3.1.23 2.3.1.-] | (RefSeq) lysophospholipid acyltransferase 1-like (A)	ko00561: Glycerolipid metabolism; ko00564: Glycerophospholipid metabolism; ko00565: Ether lipid metabolism	lysophospholipid acyltransferase 1-like [Dendrobium catenatum]	RecName: Full=Lysophospholipid acyltransferase 1; Short=AtLPLAT1; EC=2.3.1.-; AltName: Full=1-acylglycerophosphocholine O-acyltransferase 1; EC=2.3.1.23; AltName: Full=1-acylglycerophosphoethanolamine O-acyltransferase; EC=2.3.1.n7; AltName: Full=1-acylglycerophosphoserine O-acyltransferase; EC=2.3.1.n6; AltName: Full=Lysophosphatidylcholine acyltransferase 1; Short=LPCAT1; AltName: Full=Lysophos…	SubName: Full=Lysophospholipid acyltransferase {ECO:0000313|EMBL:PKU86145.1};	Predicted membrane protein	GO:0005783,endoplasmic reticulum; GO:0005789,endoplasmic reticulum membrane; GO:0016021,integral component of membrane; GO:0005886,plasma membrane; GO:0047184,1-acylglycerophosphocholine O-acyltransferase activity; GO:0071617,lysophospholipid acyltransferase activity; GO:0016746,transferase activity, transferring acyl groups; GO:0019375,galactolipid biosynthetic process; GO:0045017,glycerolipid b…	PF03062.19:MBOAT, membrane-bound O-acyltransferase family
gene-LOC110091800	86	93	112	435	717	573	NW_021318595.1	6758968	6759759	+	LOC110091800	--	--	--	hypothetical protein MA16_Dca001979 [Dendrobium catenatum]	--	SubName: Full=Uncharacterized protein {ECO:0000313|EMBL:PKU86148.1};	--	--	PF14009.6:Domain of unknown function (DUF4228)
gene-LOC110091801	0	1	0	0	0	0	NW_021319069.1	3024	3878	-	LOC110091801	--	K00815 tyrosine aminotransferase [EC:2.6.1.5] | (RefSeq) probable aminotransferase TAT2 (A)	ko00130: Ubiquinone and other terpenoid-quinone biosynthesis; ko00270: Cysteine and methionine metabolism; ko00350: Tyrosine metabolism; ko00360: Phenylalanine metabolism; ko00400: Phenylalanine, tyrosine and tryptophan biosynthesis; ko00950: Isoquinoline alkaloid biosynthesis; ko00960: Tropane, piperidine and pyridine alkaloid biosynthesis	uncharacterized protein LOC110091801 [Dendrobium catenatum]	--	SubName: Full=Uncharacterized protein {ECO:0000313|EMBL:PKU59204.1};	FOG: Reverse transcriptase	--	--
gene-LOC110091804	6159	6175	7695	5898	8444	4790	NW_021319083.1	2985734	3021267	+	LOC110091804	--	K02520 translation initiation factor IF-3 | (RefSeq) uncharacterized protein LOC110091804 (A)	--	uncharacterized protein LOC110091804 [Dendrobium catenatum]	RecName: Full=Translation initiation factor IF3-2, chloroplastic {ECO:0000305}; Short=AtIF3-2 {ECO:0000303|PubMed:25630975}; AltName: Full=AtINFC-2 {ECO:0000303|PubMed:25630975}; AltName: Full=Protein SUPPRESSOR OF VARIEGATION 9 {ECO:0000303|PubMed:27535792}; Flags: Precursor;	SubName: Full=Translation initiation factor IF-3, chloroplastic {ECO:0000313|EMBL:PKA57605.1};	--	GO:0009507,chloroplast; GO:0043022,ribosome binding; GO:0003743,translation initiation factor activity; GO:0009658,chloroplast organization; GO:0048366,leaf development; GO:0032790,ribosome disassembly	PF00707.22:Translation initiation factor IF-3, C-terminal domain
gene-LOC110091805	2483	2235	2941	1626	1995	1673	NW_021320126.1	12560	43767	+	LOC110091805	--	K11644 paired amphipathic helix protein Sin3a | (RefSeq) paired amphipathic helix protein Sin3-like 4 isoform X1 (A)	--	paired amphipathic helix protein Sin3-like 4 isoform X1 [Dendrobium catenatum]	RecName: Full=Paired amphipathic helix protein Sin3-like 4;	SubName: Full=Paired amphipathic helix protein Sin3-like 4 {ECO:0000313|EMBL:PKU63504.1};	Histone deacetylase complex, SIN3 component	GO:0000785,chromatin; GO:0000118,histone deacetylase complex; GO:0001106,NA; GO:0016575,histone deacetylation; GO:0000122,negative regulation of transcription by RNA polymerase II; GO:0006351,transcription, DNA-templated	PF16879.5:C-terminal domain of Sin3a protein
gene-LOC110091806	720	629	693	313	429	309	NW_021320079.1	2401600	2413792	-	LOC110091806	--	K16586 HAUS augmin-like complex subunit 3 | (RefSeq) AUGMIN subunit 3 (A)	--	AUGMIN subunit 3-like [Dendrobium catenatum]	RecName: Full=AUGMIN subunit 3 {ECO:0000303|PubMed:22505726};	SubName: Full=Uncharacterized protein {ECO:0000313|EMBL:PKU64115.1};	--	GO:0070652,HAUS complex; GO:0005874,microtubule; GO:0005634,nucleus; GO:0009524,phragmoplast; GO:0005819,spindle; GO:0051301,cell division; GO:0080175,phragmoplast microtubule organization; GO:0051225,spindle assembly	PF14932.6:HAUS augmin-like complex subunit 3
gene-LOC110091807	436	441	607	541	710	524	NW_021320126.1	146755	156312	+	LOC110091807	--	--	--	PHD finger protein At1g33420 [Dendrobium catenatum]	RecName: Full=PHD finger protein At1g33420;	SubName: Full=PHD finger protein {ECO:0000313|EMBL:PKU63513.1};	PHD Zn-finger proteins	GO:0005634,nucleus; GO:0046872,metal ion binding; GO:0006355,regulation of transcription, DNA-templated; GO:0006351,transcription, DNA-templated	PF00628.29:PHD-finger
gene-LOC110091808	100	85	138	126	79	42	NW_021320126.1	156200	168798	-	LOC110091808	--	--	--	--	--	--	--	--	--
gene-LOC110091811	0	0	0	0	1	0	--	--	--	--	--	--	--	--
gene-LOC110091813	0	0	0	0	0	4	--	--	--	--	--	--	--	--
gene-LOC110091815	228	223	297	386	372	253	NW_021320126.1	187795	227172	+	LOC110091815	--	K13459 disease resistance protein RPS2 | (RefSeq) disease resistance protein At4g27190-like isoform X1 (A)	ko04626: Plant-pathogen interaction	BAG-associated GRAM protein 1 [Dendrobium catenatum]	RecName: Full=BAG-associated GRAM protein 1 {ECO:0000303|PubMed:26739014};	SubName: Full=C2 and GRAM domain-containing protein {ECO:0000313|EMBL:PKU63514.1};	Uncharacterized conserved protein, contains GRAM domain	GO:0016021,integral component of membrane; GO:0050832,defense response to fungus	PF16016.5:VAD1 Analog of StAR-related lipid transfer domain
gene-LOC110091817	1514	1371	1967	1368	1982	1080	NW_021320126.1	67104	89258	-	LOC110091817	--	K01426 amidase [EC:3.5.1.4] | (RefSeq) amidase 1 isoform X1 (A)	ko00330: Arginine and proline metabolism; ko00360: Phenylalanine metabolism; ko00380: Tryptophan metabolism	outer envelope protein 64, chloroplastic [Dendrobium catenatum]	RecName: Full=Outer envelope protein 64, chloroplastic; AltName: Full=Translocon at the outer membrane of chloroplasts 64-III;	SubName: Full=Translocon at the outer membrane of chloroplasts 64 {ECO:0000313|EMBL:PKU63505.1};	Amidases	GO:0009507,chloroplast; GO:0009941,chloroplast envelope; GO:0031359,integral component of chloroplast outer membrane; GO:0009536,plastid; GO:0004040,amidase activity; GO:0015031,protein transport	PF01425.21:Amidase
gene-LOC110091818	6	10	10	55	65	58	NW_021320126.1	102628	112039	+	LOC110091818	--	K13347 peroxisomal membrane protein 2 | (RefSeq) protein sym-1-like (A)	ko04146: Peroxisome	uncharacterized protein LOC110091818 [Dendrobium catenatum]	RecName: Full=Serine/threonine-protein kinase ATG1c {ECO:0000305}; EC=2.7.11.-; AltName: Full=Autophagy-related protein 1c {ECO:0000303|PubMed:12114572}; Short=AtAPG1c {ECO:0000303|PubMed:12114572};	SubName: Full=Uncharacterized protein {ECO:0000313|EMBL:PKU63507.1};	--	GO:0005776,autophagosome; GO:0031410,cytoplasmic vesicle; GO:0005524,ATP binding; GO:0004674,protein serine/threonine kinase activity; GO:0006914,autophagy; GO:0015031,protein transport	--
gene-LOC110091819	111	77	140	130	194	109	NW_021320126.1	246324	269793	+	LOC110091819	--	K01069 hydroxyacylglutathione hydrolase [EC:3.1.2.6] | (RefSeq) hydroxyacylglutathione hydrolase 1, mitochondrial-like (A)	ko00620: Pyruvate metabolism	hydroxyacylglutathione hydrolase 1, mitochondrial-like [Dendrobium catenatum]	RecName: Full=Hydroxyacylglutathione hydrolase 1, mitochondrial; EC=3.1.2.6; AltName: Full=Glyoxalase II; Short=Glx II; Flags: Precursor;	SubName: Full=Hydroxyacylglutathione hydrolase 1, mitochondrial {ECO:0000313|EMBL:PKU63515.1};	Glyoxylase	GO:0005739,mitochondrion; GO:0008800,beta-lactamase activity; GO:0004416,hydroxyacylglutathione hydrolase activity; GO:0046872,metal ion binding; GO:0008270,zinc ion binding; GO:0017001,antibiotic catabolic process; GO:0019243,methylglyoxal catabolic process to D-lactate via S-lactoyl-glutathione; GO:0043200,response to amino acid; GO:0034059,response to anoxia; GO:0009651,response to salt stress	PF00753.27:Metallo-beta-lactamase superfamily
gene-LOC110091820	149	153	209	192	113	79	NW_021320126.1	227398	231640	-	LOC110091820	--	K00430 peroxidase [EC:1.11.1.7] | (RefSeq) probable peroxidase 26 (A)	ko00940: Phenylpropanoid biosynthesis	probable peroxidase 26 [Dendrobium catenatum]	RecName: Full=Probable peroxidase 26; Short=Atperox P26; EC=1.11.1.7; AltName: Full=ATP50; Flags: Precursor;	RecName: Full=Peroxidase {ECO:0000256|RuleBase:RU362060, ECO:0000256|SAAS:SAAS00709852}; EC=1.11.1.7 {ECO:0000256|RuleBase:RU362060, ECO:0000256|SAAS:SAAS00709852};	--	GO:0005576,extracellular region; GO:0009505,plant-type cell wall; GO:0009506,plasmodesma; GO:0020037,heme binding; GO:0046872,metal ion binding; GO:0004601,peroxidase activity; GO:0042744,hydrogen peroxide catabolic process; GO:0009664,plant-type cell wall organization; GO:0006979,response to oxidative stress	PF00141.23:Peroxidase
gene-LOC110091824	25	13	22	21	15	8	NW_021318693.1	9547916	9550286	-	LOC110091824	--	K13422 transcription factor MYC2 | (RefSeq) transcription factor MYC2 (A)	ko04016: MAPK signaling pathway - plant; ko04075: Plant hormone signal transduction	transcription factor MYC3-like [Dendrobium catenatum]	RecName: Full=Transcription factor MYC3; AltName: Full=Basic helix-loop-helix protein 5; Short=AtbHLH5; Short=bHLH 5; AltName: Full=Protein ALTERED TRYPTOPHAN REGULATION 2; AltName: Full=Transcription factor ATR2; AltName: Full=Transcription factor EN 36; AltName: Full=bHLH transcription factor bHLH005;	SubName: Full=Transcription factor bHLH14 {ECO:0000313|EMBL:PKU83724.1};	--	GO:0005634,nucleus; GO:0043425,bHLH transcription factor binding; GO:0003677,DNA binding; GO:0003700,DNA-binding transcription factor activity; GO:0046983,protein dimerization activity; GO:0009718,anthocyanin-containing compound biosynthetic process; GO:0006952,defense response; GO:0045893,positive regulation of transcription, DNA-templated; GO:0006355,regulation of transcription, DNA-templated; …	PF14215.6:bHLH-MYC and R2R3-MYB transcription factors N-terminal
gene-LOC110091825	18	55	23	64	96	36	NW_021318693.1	9543233	9558610	-	LOC110091825	--	K11803 WD repeat-containing protein 40A | (RefSeq) hypothetical protein (A)	--	F-box/WD repeat-containing protein pof10-like isoform X1 [Dendrobium catenatum]	--	SubName: Full=Uncharacterized protein {ECO:0000313|EMBL:PKU84434.1};	Cdc4 and related F-box and WD-40 proteins	--	PF12937.7:F-box-like
gene-LOC110091826	141	156	127	47	69	83	NW_021318693.1	9676738	9679043	-	LOC110091826	--	--	--	protein UPSTREAM OF FLC-like [Dendrobium catenatum]	RecName: Full=Protein UPSTREAM OF FLC;	SubName: Full=Uncharacterized protein {ECO:0000313|EMBL:PKU84439.1};	--	--	PF06136.13:Domain of unknown function (DUF966)
gene-LOC110091827	4	1	1	0	2	0	NW_021319083.1	2880346	2909818	+	LOC110091827	--	K09264 MADS-box transcription factor, plant | (RefSeq) floral homeotic protein AGAMOUS-like (A)	--	floral homeotic protein AGAMOUS-like [Dendrobium catenatum]	RecName: Full=Floral homeotic protein AGAMOUS; AltName: Full=GAG2;	SubName: Full=MADS-box protein 2 {ECO:0000313|EMBL:ABQ08574.1};	MADS box transcription factor	GO:0005634,nucleus; GO:0003700,DNA-binding transcription factor activity; GO:0046983,protein dimerization activity; GO:0000977,RNA polymerase II regulatory region sequence-specific DNA binding; GO:0045944,positive regulation of transcription by RNA polymerase II; GO:0006351,transcription, DNA-templated	PF01486.17:K-box region
gene-LOC110091828	1	9	6	25	9	13	NW_021318693.1	9668657	9670313	-	LOC110091828	--	K09422 transcription factor MYB, plant | (RefSeq) myb-related protein MYBAS2-like isoform X1 (A)	--	myb-related protein MYBAS2-like isoform X1 [Dendrobium catenatum]	RecName: Full=Myb-related protein MYBAS1;	SubName: Full=Myb-related protein MYBAS1 {ECO:0000313|EMBL:PKU84438.1};	Transcription factor, Myb superfamily	GO:0005634,nucleus; GO:0000981,DNA-binding transcription factor activity, RNA polymerase II-specific; GO:0043565,sequence-specific DNA binding; GO:0001135,RNA polymerase II transcription regulator recruiting activity; GO:0044212,transcription regulatory region DNA binding; GO:0030154,cell differentiation; GO:0006357,regulation of transcription by RNA polymerase II; GO:0006351,transcription, DNA-t…	PF00249.31:Myb-like DNA-binding domain
gene-LOC110091829	3379	3078	3872	3180	4356	2683	NW_021318693.1	9714856	9729816	-	LOC110091829	--	K00164 2-oxoglutarate dehydrogenase E1 component [EC:1.2.4.2] | (RefSeq) 2-oxoglutarate dehydrogenase, mitochondrial-like (A)	ko00020: Citrate cycle (TCA cycle); ko01200: Carbon metabolism	2-oxoglutarate dehydrogenase, mitochondrial-like [Dendrobium catenatum]	--	SubName: Full=2-oxoglutarate dehydrogenase E1 component {ECO:0000313|EMBL:PKU84442.1};	2-oxoglutarate dehydrogenase, E1 subunit	--	PF02779.24:Transketolase, pyrimidine binding domain
gene-LOC110091830	156	288	206	508	559	620	NW_021318693.1	9369580	9392130	-	LOC110091830	--	K23490 cytochrome b5 | (RefSeq) cytochrome b5-like (A)	--	cytochrome b5-like [Dendrobium catenatum]	RecName: Full=Cytochrome b5 isoform E {ECO:0000303|PubMed:19054355}; Short=AtCb5-E {ECO:0000303|PubMed:19054355}; AltName: Full=Cytochrome b5 isoform 1; AltName: Full=Cytochrome b5 isoform A {ECO:0000303|PubMed:22384013}; Short=AtCb5-A {ECO:0000303|PubMed:22384013};	SubName: Full=Cytochrome b5 isoform A {ECO:0000313|EMBL:PKA56323.1}; EC=1.7.1.1 {ECO:0000313|EMBL:PKA56323.1};	Cytochrome b5	GO:0009535,chloroplast thylakoid membrane; GO:0005783,endoplasmic reticulum; GO:0005789,endoplasmic reticulum membrane; GO:0016021,integral component of membrane; GO:0005886,plasma membrane; GO:0005774,vacuolar membrane; GO:0005773,vacuole; GO:0020037,heme binding; GO:0046872,metal ion binding; GO:0055114,oxidation-reduction process	PF00173.28:Cytochrome b5-like Heme/Steroid binding domain
gene-LOC110091831	2890	2309	3601	2199	3079	1843	NW_021318693.1	9756545	9766391	+	LOC110091831	--	--	--	uncharacterized protein LOC110091831 [Dendrobium catenatum]	--	SubName: Full=Uncharacterized protein {ECO:0000313|EMBL:PKU84443.1};	--	--	--
gene-LOC110091832	609	601	780	1640	1475	1153	NW_021318693.1	9600305	9614982	-	LOC110091832	--	K15285 solute carrier family 35, member E3 | (RefSeq) UDP-galactose transporter 1 isoform X1 (A)	--	probable sugar phosphate/phosphate translocator At3g17430 [Dendrobium catenatum]	RecName: Full=Probable sugar phosphate/phosphate translocator At3g17430;	SubName: Full=Putative sugar phosphate/phosphate translocator {ECO:0000313|EMBL:PKU84436.1};	Glucose-6-phosphate/phosphate and phosphoenolpyruvate/phosphate antiporter	GO:0005794,Golgi apparatus; GO:0016021,integral component of membrane; GO:0008643,carbohydrate transport	PF03151.16:Triose-phosphate Transporter family
gene-LOC110091833	6	6	16	0	0	1	NW_021318693.1	9629942	9631825	-	LOC110091833	--	--	--	uncharacterized protein LOC110091833 [Dendrobium catenatum]	--	SubName: Full=Uncharacterized protein {ECO:0000313|EMBL:PKU84437.1};	--	--	PF07795.11:Protein of unknown function (DUF1635)
gene-LOC110091835	0	10	0	9	52	54	NW_021318693.1	9710134	9710941	+	LOC110091835	--	K14841 ribosome biogenesis protein NSA1 | (RefSeq) WD repeat-containing protein DDB_G0290555 (A)	--	zinc finger protein ZAT12-like [Dendrobium catenatum]	RecName: Full=Zinc finger protein ZAT11;	SubName: Full=Zinc finger protein ZAT5 {ECO:0000313|EMBL:PKU84441.1};	FOG: Zn-finger	GO:0005634,nucleus; GO:0003700,DNA-binding transcription factor activity; GO:0046872,metal ion binding; GO:0003676,nucleic acid binding; GO:0071289,cellular response to nickel ion; GO:2000280,regulation of root development; GO:0006355,regulation of transcription, DNA-templated; GO:0010200,response to chitin; GO:0006351,transcription, DNA-templated	PF13912.6:C2H2-type zinc finger
gene-LOC110091836	804	707	950	931	1189	690	NW_021318693.1	9431055	9534790	+	LOC110091836	--	K08835 serine/threonine-protein kinase OSR1/STK39 [EC:2.7.11.1] | (RefSeq) serine/threonine-protein kinase BLUS1 isoform X2 (A)	--	serine/threonine-protein kinase BLUS1-like [Dendrobium catenatum]	RecName: Full=Serine/threonine-protein kinase BLUS1; EC=2.7.11.1; AltName: Full=Protein BLUE LIGHT SIGNALING 1;	SubName: Full=Mitogen-activated protein kinase kinase kinase YODA {ECO:0000313|EMBL:PKU84433.1};	Ste20-like serine/threonine protein kinase	GO:0005829,cytosol; GO:0005524,ATP binding; GO:0046872,metal ion binding; GO:0004674,protein serine/threonine kinase activity; GO:0032147,activation of protein kinase activity; GO:0007346,regulation of mitotic cell cycle; GO:1902456,regulation of stomatal opening; GO:0023014,signal transduction by protein phosphorylation; GO:0031098,stress-activated protein kinase signaling cascade	PF00069.25:Protein kinase domain
gene-LOC110091837	36	63	68	141	186	61	NW_021319083.1	2830542	2854067	+	LOC110091837	--	--	--	uncharacterized protein LOC110091837 isoform X1 [Dendrobium catenatum]	--	SubName: Full=Uncharacterized protein {ECO:0000313|EMBL:PKU86317.1};	--	--	--
gene-LOC110091839	6	9	9	22	28	19	NW_021320063.1	23893	32096	-	LOC110091839	--	K13415 protein brassinosteroid insensitive 1 [EC:2.7.10.1 2.7.11.1] | (RefSeq) protein BRASSINOSTEROID INSENSITIVE 1-like (A)	ko04075: Plant hormone signal transduction	receptor-like serine/threonine-protein kinase At1g78530 isoform X2 [Dendrobium catenatum]	RecName: Full=Receptor-like serine/threonine-protein kinase At1g78530; EC=2.7.11.1;	SubName: Full=Receptor-like serine/threonine-protein kinase {ECO:0000313|EMBL:PKU64421.1};	Serine/threonine protein kinase	GO:0016021,integral component of membrane; GO:0005886,plasma membrane; GO:0005524,ATP binding; GO:0004674,protein serine/threonine kinase activity	PF00069.25:Protein kinase domain
gene-LOC110091847	1060	1067	1138	1109	1632	1024	NW_021319073.1	78676	164075	+	LOC110091847	--	K23334 Ran-binding protein 9/10 | (RefSeq) ran-binding protein M homolog (A)	--	ran-binding protein 10 [Dendrobium catenatum]	RecName: Full=Ran-binding protein M homolog {ECO:0000305}; Short=AtRanBPM {ECO:0000303|PubMed:22676313};	SubName: Full=E3 ubiquitin-protein ligase RKP {ECO:0000313|EMBL:PKU79664.1};	SPRY domain-containing proteins	GO:0005737,cytoplasm; GO:0005634,nucleus; GO:0048471,perinuclear region of cytoplasm	PF00622.28:SPRY domain
gene-LOC110091849	5	2	3	2	0	0	NW_021319073.1	57308	58124	-	LOC110091849	--	K09264 MADS-box transcription factor, plant | (RefSeq) MADS-box transcription factor 6-like (A)	--	MADS-box transcription factor 22-like [Dendrobium catenatum]	RecName: Full=Agamous-like MADS-box protein AGL65 {ECO:0000305};	SubName: Full=MADS-box transcription factor 22 {ECO:0000313|EMBL:PKU79661.1};	MADS box transcription factor	GO:0005634,nucleus; GO:0003700,DNA-binding transcription factor activity; GO:0046983,protein dimerization activity; GO:0000987,proximal promoter sequence-specific DNA binding; GO:0000982,transcription factor activity, RNA polymerase II proximal promoter sequence-specific DNA binding; GO:0010152,pollen maturation; GO:0045944,positive regulation of transcription by RNA polymerase II; GO:0080092,reg…	PF00319.18:SRF-type transcription factor (DNA-binding and dimerisation domain)
gene-LOC110091852	20	18	36	6	22	12	NW_021319073.1	251735	252593	+	LOC110091852	--	K03676 glutaredoxin 3 | (RefSeq) glutaredoxin-C1-like (A)	--	glutaredoxin-C1-like [Dendrobium catenatum]	RecName: Full=Glutaredoxin-C1;	SubName: Full=Glutaredoxin-C1 {ECO:0000313|EMBL:PKU79666.1};	Glutaredoxin and related proteins	GO:0005737,cytoplasm; GO:0009055,electron transfer activity; GO:0015035,protein disulfide oxidoreductase activity; GO:0045454,cell redox homeostasis	PF00462.24:Glutaredoxin
gene-LOC110091853	574	577	679	857	1084	689	NW_021319073.1	191374	212436	+	LOC110091853	--	K10088 protein OS-9 | (RefSeq) protein OS-9 homolog (A)	ko04141: Protein processing in endoplasmic reticulum	hypothetical protein MA16_Dca024352 [Dendrobium catenatum]	RecName: Full=Protein OS-9 homolog {ECO:0000305}; Short=AtOS9 {ECO:0000303|PubMed:22516478}; AltName: Full=Protein EMS-MUTAGENIZED BRI1 SUPPRESSOR 6 {ECO:0000303|PubMed:22516478}; Flags: Precursor;	SubName: Full=Uncharacterized protein {ECO:0000313|EMBL:PKU79665.1};	Protein OS-9	GO:0005783,endoplasmic reticulum; GO:0005788,endoplasmic reticulum lumen; GO:0030246,carbohydrate binding; GO:0009651,response to salt stress; GO:0030970,retrograde protein transport, ER to cytosol; GO:0030433,ubiquitin-dependent ERAD pathway	PF07915.13:Glucosidase II beta subunit-like protein
gene-LOC110091854	24	29	42	60	86	47	NW_021319109.1	282932	293393	+	LOC110091854	--	K18177 cytochrome c oxidase assembly factor 4 | (RefSeq) cytochrome c oxidase assembly factor 4 homolog, mitochondrial (A)	--	cytochrome c oxidase assembly factor 4 homolog, mitochondrial [Dendrobium catenatum]	--	SubName: Full=Uncharacterized protein {ECO:0000313|EMBL:PKU78237.1};	--	--	PF06747.13:CHCH domain
gene-LOC110091855	5706	4596	7426	4839	6155	2979	NW_021320019.1	6771623	6787763	-	LOC110091855	--	K12133 MYB-related transcription factor LHY | (RefSeq) protein LHY-like (A)	ko04712: Circadian rhythm - plant	protein LHY-like, partial [Dendrobium catenatum]	RecName: Full=Protein LHY {ECO:0000303|PubMed:9657154}; AltName: Full=MYB-related transcription factor LHY {ECO:0000303|PubMed:9657154}; AltName: Full=Protein LATE ELONGATED HYPOCOTYL {ECO:0000303|PubMed:9657154};	SubName: Full=Protein CCA1 {ECO:0000313|EMBL:PKU65108.1};	Zuotin and related molecular chaperones (DnaJ superfamily), contains DNA-binding domains	GO:0005634,nucleus; GO:0003700,DNA-binding transcription factor activity; GO:0044212,transcription regulatory region DNA binding; GO:0007623,circadian rhythm; GO:0048574,long-day photoperiodism, flowering; GO:0042754,negative regulation of circadian rhythm; GO:0043433,negative regulation of DNA-binding transcription factor activity; GO:0042752,regulation of circadian rhythm; GO:0006355,regulation…	--
gene-LOC110091856	610	703	890	1235	1256	671	NW_021320019.1	6804750	6837515	+	LOC110091856	--	K12603 CCR4-NOT transcription complex subunit 6 [EC:3.1.13.4] | (RefSeq) glucose-repressible alcohol dehydrogenase transcriptional effector-like (A)	ko03018: RNA degradation	carbon catabolite repressor protein 4 homolog 6-like [Dendrobium catenatum]	RecName: Full=Carbon catabolite repressor protein 4 homolog 6; Short=CCR4 homolog 6; EC=3.1.13.4;	SubName: Full=Carbon catabolite repressor protein 4 like 6 {ECO:0000313|EMBL:PKU65110.1};	Transcriptional effector CCR4-related protein	GO:0005737,cytoplasm; GO:0005634,nucleus; GO:0046872,metal ion binding; GO:0004535,poly(A)-specific ribonuclease activity; GO:0003723,RNA binding; GO:0006355,regulation of transcription, DNA-templated; GO:0006351,transcription, DNA-templated	PF03372.23:Endonuclease/Exonuclease/phosphatase family
gene-LOC110091857	627	667	939	1205	1237	861	NW_021320019.1	6860680	6865968	-	LOC110091857	--	K14486 auxin response factor | (Kazusa) Lj6g3v2006460.1; - (A)	ko04075: Plant hormone signal transduction	LOW QUALITY PROTEIN: auxin response factor 18-like [Dendrobium catenatum]	RecName: Full=Auxin response factor 18; AltName: Full=OsARF10;	SubName: Full=Auxin response factor 18 {ECO:0000313|EMBL:PKU65113.1};	--	GO:0005634,nucleus; GO:0003677,DNA binding; GO:0009734,auxin-activated signaling pathway; GO:0006355,regulation of transcription, DNA-templated; GO:0006351,transcription, DNA-templated	PF06507.13:Auxin response factor
gene-LOC110091858	3	4	0	0	3	3	NW_021318693.1	7012080	7013975	+	LOC110091858	--	--	--	wiskott-Aldrich syndrome protein family member 2-like [Dendrobium catenatum]	--	SubName: Full=Uncharacterized protein {ECO:0000313|EMBL:PKU84387.1};	--	--	PF05553.11:Cotton fibre expressed protein
gene-LOC110091859	372	455	468	618	845	700	NW_021318693.1	7086970	7123618	-	LOC110091859	--	K14399 polyribonucleotide 5'-hydroxyl-kinase [EC:2.7.1.78] | (RefSeq) protein CLP1 homolog (A)	ko03015: mRNA surveillance pathway	protein CLP1 homolog [Dendrobium catenatum]	RecName: Full=Protein CLP1 homolog {ECO:0000255|HAMAP-Rule:MF_03035}; AltName: Full=CLP-like protein 3; AltName: Full=Protein CLP-SIMILAR PROTEIN 3;	SubName: Full=Protein CLP1 like {ECO:0000313|EMBL:PKU84390.1};	mRNA cleavage and polyadenylation factor IA/II complex, subunit CLP1	GO:0005849,mRNA cleavage factor complex; GO:0005634,nucleus; GO:0005524,ATP binding; GO:0051731,polynucleotide 5'-hydroxyl-kinase activity; GO:0009908,flower development; GO:0006379,mRNA cleavage; GO:0006378,mRNA polyadenylation; GO:0006397,mRNA processing; GO:0048827,phyllome development; GO:0006388,tRNA splicing, via endonucleolytic cleavage and ligation; GO:0010228,vegetative to reproductive p…	PF16575.5:mRNA cleavage and polyadenylation factor CLP1 P-loop
gene-LOC110091860	1207	1281	1364	1762	2060	1400	NW_021318693.1	7046073	7085692	+	LOC110091860	--	K04382 serine/threonine-protein phosphatase 2A catalytic subunit [EC:3.1.3.16] | (RefSeq) serine/threonine-protein phosphatase PP2A-1 catalytic subunit (A)	ko03015: mRNA surveillance pathway; ko04136: Autophagy - other	serine/threonine-protein phosphatase PP2A-1 catalytic subunit [Dendrobium catenatum]	RecName: Full=Serine/threonine-protein phosphatase PP2A-1 catalytic subunit; EC=3.1.3.16;	SubName: Full=Serine/threonine-protein phosphatase PP2A-1 catalytic subunit {ECO:0000313|EMBL:PKU84389.1};	Serine/threonine protein phosphatase 2A, catalytic subunit	GO:0005737,cytoplasm; GO:0046872,metal ion binding; GO:0004721,phosphoprotein phosphatase activity	PF00149.28:Calcineurin-like phosphoesterase
gene-LOC110091861	186	268	143	539	1401	1807	NW_021318693.1	7163657	7164043	-	LOC110091861	--	--	--	putative glycine-rich cell wall structural protein 1 [Dendrobium catenatum]	--	SubName: Full=Uncharacterized protein {ECO:0000313|EMBL:PKU84393.1};	--	--	--
gene-LOC110091862	3	16	4	13	45	134	NW_021318693.1	7125885	7128236	-	LOC110091862	--	--	--	putative glycine-rich cell wall structural protein 1 [Dendrobium catenatum]	--	SubName: Full=Uncharacterized protein {ECO:0000313|EMBL:PKU84391.1};	--	--	--
gene-LOC110091865	4	0	8	20	33	5	NW_021318693.1	7033480	7034738	+	LOC110091865	--	K13424 WRKY transcription factor 33 | (RefSeq) probable WRKY transcription factor 26 (A)	ko04016: MAPK signaling pathway - plant; ko04626: Plant-pathogen interaction	probable WRKY transcription factor 43 [Dendrobium catenatum]	RecName: Full=Probable WRKY transcription factor 50; AltName: Full=WRKY DNA-binding protein 50;	SubName: Full=probable WRKY transcription factor 50 {ECO:0000313|RefSeq:XP_008810071.1};	--	GO:0005634,nucleus; GO:0003700,DNA-binding transcription factor activity; GO:0043565,sequence-specific DNA binding; GO:0050832,defense response to fungus; GO:0009867,jasmonic acid mediated signaling pathway; GO:0006351,transcription, DNA-templated	PF03106.15:WRKY DNA -binding domain
gene-LOC110091866	79	81	51	128	264	224	NW_021318693.1	6986493	7000917	-	LOC110091866	--	--	--	uncharacterized protein LOC110091866 [Dendrobium catenatum]	--	SubName: Full=Uncharacterized protein {ECO:0000313|EMBL:PKU84386.1};	--	--	--
gene-LOC110091867	160	270	208	302	437	356	NW_021318693.1	6969206	6982178	+	LOC110091867	--	K15263 cell growth-regulating nucleolar protein | (RefSeq) UBP1-associated proteins 1C isoform X1 (A)	--	UBP1-associated proteins 1C isoform X1 [Dendrobium catenatum]	RecName: Full=UBP1-associated proteins 1C;	SubName: Full=Uncharacterized protein {ECO:0000313|EMBL:PKU84385.1};	Cell growth-regulating nucleolar protein	GO:0005634,nucleus; GO:0003723,RNA binding; GO:0008270,zinc ion binding	PF08790.11:LYAR-type C2HC zinc finger
gene-LOC110091868	2163	3032	2149	1932	3920	4733	NW_021318711.1	146687	159924	+	LOC110091868	--	K21776 protein lin-54 | (RefSeq) Lin-54-like protein (A)	--	Acyl carrier protein 3, chloroplastic [Dendrobium catenatum]	RecName: Full=Acyl carrier protein 3, chloroplastic; Short=ACP; Flags: Precursor;	SubName: Full=Acyl carrier protein 3, chloroplastic {ECO:0000313|EMBL:PKU83892.1};	Acyl carrier protein/NADH-ubiquinone oxidoreductase, NDUFAB1/SDAP subunit	GO:0009507,chloroplast; GO:0006633,fatty acid biosynthetic process	PF00550.25:Phosphopantetheine attachment site
gene-LOC110091869	1156	1103	1466	1021	1066	635	NW_021319588.1	102006	178294	+	LOC110091869	--	K15199 general transcription factor 3C polypeptide 1 | (RefSeq) uncharacterized protein LOC110091869 isoform X1 (A)	--	uncharacterized protein LOC110091869 isoform X1 [Dendrobium catenatum]	--	SubName: Full=Uncharacterized protein {ECO:0000313|EMBL:PKA51962.1};	--	--	PF04182.12:B-block binding subunit of TFIIIC
gene-LOC110091870	459	451	608	563	635	507	NW_021319083.1	2776320	2810872	-	LOC110091870	--	K02433 aspartyl-tRNA(Asn)/glutamyl-tRNA(Gln) amidotransferase subunit A [EC:6.3.5.6 6.3.5.7] | (RefSeq) Glutamyl-tRNA(Gln) amidotransferase subunit A (A)	ko00970: Aminoacyl-tRNA biosynthesis	phosphatidylinositol/phosphatidylcholine transfer protein SFH8-like [Dendrobium catenatum]	RecName: Full=Phosphatidylinositol/phosphatidylcholine transfer protein SFH8; AltName: Full=Protein SEC FOURTEEN HOMOLOGS 8; Short=AtSFH8;	SubName: Full=Patellin-3 {ECO:0000313|EMBL:PKU78753.1};	Phosphatidylinositol transfer protein SEC14 and related proteins	GO:0000139,Golgi membrane; GO:0005886,plasma membrane; GO:0015031,protein transport	PF00650.20:CRAL/TRIO domain
gene-LOC110091871	708	780	860	785	851	784	NW_021319588.1	181822	193848	+	LOC110091871	--	K01464 dihydropyrimidinase [EC:3.5.2.2] | (RefSeq) dihydropyrimidinase-like (A)	ko00240: Pyrimidine metabolism; ko00410: beta-Alanine metabolism; ko00770: Pantothenate and CoA biosynthesis	dihydropyrimidinase [Dendrobium catenatum]	RecName: Full=Dihydropyrimidinase {ECO:0000303|PubMed:12626710}; EC=3.5.2.2 {ECO:0000269|PubMed:19413687}; AltName: Full=Dihydropyrimidine amidohydrolase {ECO:0000303|PubMed:12626710}; AltName: Full=Protein PYRIMIDINE 2 {ECO:0000303|PubMed:12626710};	SubName: Full=Dihydropyrimidinase {ECO:0000313|EMBL:PKU70119.1};	Dihydroorotase and related enzymes	GO:0012505,endomembrane system; GO:0005783,endoplasmic reticulum; GO:0005794,Golgi apparatus; GO:0004157,dihydropyrimidinase activity; GO:0046872,metal ion binding; GO:0019483,beta-alanine biosynthetic process; GO:0043562,cellular response to nitrogen levels; GO:0006212,uracil catabolic process	PF01979.20:Amidohydrolase family
gene-LOC110091872	1	6	13	30	18	5	NW_021319588.1	633391	659772	+	LOC110091872	--	K09422 transcription factor MYB, plant | (RefSeq) transcription factor GAMYB-like isoform X1 (A)	--	transcription factor GAMYB-like isoform X1 [Dendrobium catenatum]	RecName: Full=Transcription factor GAMYB; AltName: Full=OsGAMyb;	SubName: Full=Transcription factor GAMYB {ECO:0000313|EMBL:PKU70134.1};	Transcription factor, Myb superfamily	GO:0005634,nucleus; GO:0003677,DNA binding; GO:0048653,anther development; GO:0030154,cell differentiation; GO:0009555,pollen development; GO:0006355,regulation of transcription, DNA-templated; GO:0006351,transcription, DNA-templated	PF00249.31:Myb-like DNA-binding domain
gene-LOC110091873	289	324	355	447	546	387	NW_021319588.1	431917	450124	+	LOC110091873	--	K14431 transcription factor TGA | (RefSeq) transcription factor HBP-1b(c38)-like (A)	ko04075: Plant hormone signal transduction	transcription factor HBP-1b(c38)-like [Dendrobium catenatum]	RecName: Full=Transcription factor HBP-1b(c1); Flags: Fragment;	SubName: Full=Transcription factor TGA2 {ECO:0000313|EMBL:AGI17587.1};	--	GO:0005634,nucleus; GO:0003700,DNA-binding transcription factor activity; GO:0043565,sequence-specific DNA binding; GO:0006351,transcription, DNA-templated	PF14144.6:Seed dormancy control
gene-LOC110091874	120	90	137	260	350	130	NW_021319588.1	458675	466553	+	LOC110091874	--	K16675 palmitoyltransferase ZDHHC9/14/18 [EC:2.3.1.225] | (RefSeq) probable protein S-acyltransferase 1 isoform X1 (A)	--	probable protein S-acyltransferase 1 isoform X1 [Dendrobium catenatum]	RecName: Full=Probable protein S-acyltransferase 4; EC=2.3.1.225; AltName: Full=Probable palmitoyltransferase At3g56930; AltName: Full=Zinc finger DHHC domain-containing protein At3g56930;	SubName: Full=Putative S-acyltransferase {ECO:0000313|EMBL:PKU64247.1};	DHHC-type Zn-finger proteins	GO:0016021,integral component of membrane; GO:0005886,plasma membrane; GO:0035618,root hair; GO:0030140,trans-Golgi network transport vesicle; GO:0019706,protein-cysteine S-palmitoyltransferase activity; GO:0048767,root hair elongation	PF01529.20:DHHC palmitoyltransferase
gene-LOC110091875	523	768	508	821	871	1072	NW_021319588.1	566019	570566	-	LOC110091875	--	--	--	CASP-like protein 2C3 [Dendrobium catenatum]	RecName: Full=CASP-like protein 2C2; Short=OsCASPL2C2;	SubName: Full=CASP-like protein {ECO:0000313|EMBL:PKU70132.1};	--	GO:0016021,integral component of membrane; GO:0005886,plasma membrane; GO:0051536,iron-sulfur cluster binding	PF04535.12:Domain of unknown function (DUF588)
gene-LOC110091876	369	532	457	500	660	1287	NW_021320079.1	2375969	2377381	-	LOC110091876	--	--	--	ninja-family protein 2-like [Dendrobium catenatum]	RecName: Full=Ninja-family protein 3; AltName: Full=ABI five-binding protein D1; Short=ABI5-binding protein D1; Short=TaAFP-D1;	SubName: Full=Ninja-family protein 3 {ECO:0000313|EMBL:PKU64113.1};	--	GO:0005634,nucleus; GO:0007165,signal transduction	PF16135.5:TPL-binding domain in jasmonate signalling
gene-LOC110091878	367	337	511	413	654	352	NW_021319588.1	268995	270097	-	LOC110091878	--	K13691 pathogen-inducible salicylic acid glucosyltransferase [EC:2.4.1.-] | (RefSeq) UDP-glycosyltransferase 74G1-like (A)	--	UDP-glycosyltransferase 83A1-like [Dendrobium catenatum]	RecName: Full=UDP-glycosyltransferase 83A1; EC=2.4.1.-;	SubName: Full=UDP-glycosyltransferase 83A1 {ECO:0000313|EMBL:PKU70125.1};	UDP-glucuronosyl and UDP-glucosyl transferase	GO:0043231,intracellular membrane-bounded organelle; GO:0080043,quercetin 3-O-glucosyltransferase activity; GO:0080044,quercetin 7-O-glucosyltransferase activity; GO:0008152,metabolic process	PF00201.18:UDP-glucoronosyl and UDP-glucosyl transferase
gene-LOC110091879	147	134	192	376	419	216	NW_021319588.1	288606	290796	-	LOC110091879	--	K16266 cyanohydrin UDP-glucosyltransferase [EC:2.4.1.-] | (RefSeq) linamarin synthase 2 (A)	ko00460: Cyanoamino acid metabolism	UDP-glycosyltransferase 83A1-like [Dendrobium catenatum]	RecName: Full=UDP-glycosyltransferase 83A1; EC=2.4.1.-;	SubName: Full=UDP-glycosyltransferase 83A1 {ECO:0000313|EMBL:PKU70125.1};	UDP-glucuronosyl and UDP-glucosyl transferase	GO:0043231,intracellular membrane-bounded organelle; GO:0080043,quercetin 3-O-glucosyltransferase activity; GO:0080044,quercetin 7-O-glucosyltransferase activity; GO:0008152,metabolic process	PF00201.18:UDP-glucoronosyl and UDP-glucosyl transferase
gene-LOC110091880	7	7	10	22	45	16	NW_021319588.1	247706	251642	-	LOC110091880	--	K16266 cyanohydrin UDP-glucosyltransferase [EC:2.4.1.-] | (RefSeq) linamarin synthase 2 (A)	ko00460: Cyanoamino acid metabolism	UDP-glycosyltransferase 83A1-like [Dendrobium catenatum]	RecName: Full=UDP-glycosyltransferase 83A1; EC=2.4.1.-;	SubName: Full=UDP-glycosyltransferase 83A1 {ECO:0000313|EMBL:PKU70125.1};	UDP-glucuronosyl and UDP-glucosyl transferase	GO:0043231,intracellular membrane-bounded organelle; GO:0080043,quercetin 3-O-glucosyltransferase activity; GO:0080044,quercetin 7-O-glucosyltransferase activity; GO:0008152,metabolic process	PF00201.18:UDP-glucoronosyl and UDP-glucosyl transferase
gene-LOC110091882	0	0	0	4	10	0	--	--	--	--	--	--	--	--
gene-LOC110091883	504	517	705	764	606	404	NW_021319588.1	297517	305207	+	LOC110091883	--	K16266 cyanohydrin UDP-glucosyltransferase [EC:2.4.1.-] | (RefSeq) linamarin synthase 2 (A)	ko00460: Cyanoamino acid metabolism	UDP-glycosyltransferase 83A1-like [Dendrobium catenatum]	RecName: Full=UDP-glycosyltransferase 83A1; EC=2.4.1.-;	SubName: Full=UDP-glycosyltransferase 83A1 {ECO:0000313|EMBL:PKU70125.1};	UDP-glucuronosyl and UDP-glucosyl transferase	GO:0043231,intracellular membrane-bounded organelle; GO:0080043,quercetin 3-O-glucosyltransferase activity; GO:0080044,quercetin 7-O-glucosyltransferase activity; GO:0008152,metabolic process	PF00201.18:UDP-glucoronosyl and UDP-glucosyl transferase
gene-LOC110091884	1275	970	1368	807	1206	1207	NW_021319588.1	518406	543105	+	LOC110091884	--	K11420 euchromatic histone-lysine N-methyltransferase [EC:2.1.1.43] | (RefSeq) histone-lysine N-methyltransferase, H3 lysine-9 specific SUVH1-like (A)	ko00310: Lysine degradation	histone-lysine N-methyltransferase, H3 lysine-9 specific SUVH1-like [Dendrobium catenatum]	RecName: Full=Histone-lysine N-methyltransferase, H3 lysine-9 specific SUVH1; EC=2.1.1.43; AltName: Full=Histone H3-K9 methyltransferase 1; Short=H3-K9-HMTase 1; AltName: Full=Protein SET DOMAIN GROUP 32; AltName: Full=Suppressor of variegation 3-9 homolog protein 1; Short=Su(var)3-9 homolog protein 1;	SubName: Full=Histone-lysine N-methyltransferase, H3 lysine-9 specific SUVH1 {ECO:0000313|EMBL:PKA65905.1}; EC=2.1.1.43 {ECO:0000313|EMBL:PKA65905.1};	Histone H3 (Lys9) methyltransferase SUV39H1/Clr4, required for transcriptional silencing	GO:0000775,chromosome, centromeric region; GO:0005634,nucleus; GO:0018024,histone-lysine N-methyltransferase activity; GO:0008270,zinc ion binding; GO:0040029,regulation of gene expression, epigenetic	PF02182.17:SAD/SRA domain
gene-LOC110091885	282	311	363	186	345	245	NW_021319588.1	545750	555418	-	LOC110091885	--	K23200 putative arabinosyltransferase [EC:2.4.2.-] | (RefSeq) probable arabinosyltransferase ARAD1 (A)	--	probable arabinosyltransferase ARAD1 [Dendrobium catenatum]	RecName: Full=Probable arabinosyltransferase ARAD1; EC=2.4.2.-; AltName: Full=Arabinan alpha-1,5-arabinosyltransferase; AltName: Full=L-Arabinosyltransferase; AltName: Full=Protein ARABINAN DEFICIENT 1;	SubName: Full=probable arabinosyltransferase ARAD1 isoform X1 {ECO:0000313|RefSeq:XP_008786782.1};	Acetylglucosaminyltransferase EXT1/exostosin 1	GO:0005768,endosome; GO:0005794,Golgi apparatus; GO:0000139,Golgi membrane; GO:0016021,integral component of membrane; GO:0005802,trans-Golgi network; GO:0016757,transferase activity, transferring glycosyl groups; GO:0071555,cell wall organization; GO:0045489,pectin biosynthetic process; GO:0006486,protein glycosylation	PF03016.15:Exostosin family
gene-LOC110091887	585	428	601	328	538	427	NW_021319588.1	467904	482194	-	LOC110091887	--	--	--	uncharacterized protein LOC110091887 [Dendrobium catenatum]	--	SubName: Full=Uncharacterized protein {ECO:0000313|EMBL:PKA63074.1};	--	--	--
gene-LOC110091888	844	949	1113	1213	1494	685	NW_021319588.1	211906	234083	+	LOC110091888	--	K17619 magnesium-dependent phosphatase 1 [EC:3.1.3.48 3.1.3.-] | (RefSeq) magnesium-dependent phosphatase 1 (A)	--	hypothetical protein MA16_Dca020610 [Dendrobium catenatum]	--	SubName: Full=Uncharacterized protein {ECO:0000313|EMBL:PKU70121.1};	Magnesium-dependent phosphatase	--	PF12689.7:Acid Phosphatase
gene-LOC110091889	365	455	441	553	606	479	NW_021319588.1	408434	424628	+	LOC110091889	--	K13422 transcription factor MYC2 | (RefSeq) uncharacterized protein LOC112027257 (A)	ko04016: MAPK signaling pathway - plant; ko04075: Plant hormone signal transduction	uncharacterized protein LOC110091889 isoform X1 [Dendrobium catenatum]	--	SubName: Full=Uncharacterized protein {ECO:0000313|EMBL:PKU70128.1};	FOG: Transposon-encoded proteins with TYA, reverse transcriptase, integrase domains in various combinations	--	PF03732.17:Retrotransposon gag protein
gene-LOC110091890	273	239	350	241	273	184	NW_021319588.1	16263	23413	-	LOC110091890	--	K01148 poly(A)-specific ribonuclease [EC:3.1.13.4] | (RefSeq) LOW QUALITY PROTEIN: poly(A)-specific ribonuclease PARN (A)	ko03018: RNA degradation	LOW QUALITY PROTEIN: poly(A)-specific ribonuclease PARN [Dendrobium catenatum]	RecName: Full=Poly(A)-specific ribonuclease PARN; EC=3.1.13.4; AltName: Full=Polyadenylate-specific ribonuclease; Short=AtPARN; AltName: Full=Protein ABA hypersensitive germination 2;	SubName: Full=Poly(A)-specific ribonuclease PARN {ECO:0000313|EMBL:PKU70114.1};	Poly(A)-specific exoribonuclease PARN	GO:0005739,mitochondrion; GO:0005634,nucleus; GO:0043169,cation binding; GO:0046872,metal ion binding; GO:0004535,poly(A)-specific ribonuclease activity; GO:0003723,RNA binding; GO:0006952,defense response; GO:0006397,mRNA processing; GO:0009737,response to abscisic acid; GO:0006970,response to osmotic stress; GO:0009751,response to salicylic acid; GO:0009651,response to salt stress	PF04857.20:CAF1 family ribonuclease
gene-LOC110091891	7	7	17	5	9	9	NW_021319588.1	236453	238524	-	LOC110091891	--	K22684 metacaspase-1 [EC:3.4.22.-] | (RAP-DB) Os11g0134700; Similar to Metacaspase 7 (Metacaspase 4). (A)	--	Metacaspase-9 [Dendrobium catenatum]	RecName: Full=Metacaspase-9; Short=AtMC9; EC=3.4.22.-; Contains: RecName: Full=Metacaspase-9 subunit p20; Contains: RecName: Full=Metacaspase-9 subunit p10; AltName: Full=Metacaspase 2f; Short=AtMCP2f;	SubName: Full=Metacaspase-9 {ECO:0000313|EMBL:PKU70122.1};	Metacaspase involved in regulation of apoptosis	GO:0048046,apoplast; GO:0008234,cysteine-type peptidase activity	PF00656.22:Caspase domain
gene-LOC110091892	1695	2155	1984	3230	4272	6433	NW_021319588.1	194601	206092	-	LOC110091892	--	K02183 calmodulin | (RefSeq) calmodulin-7-like (A)	ko04016: MAPK signaling pathway - plant; ko04070: Phosphatidylinositol signaling system; ko04626: Plant-pathogen interaction	PREDICTED: calmodulin-7-like [Cucumis sativus]	RecName: Full=Calmodulin; Short=CaM;	SubName: Full=calmodulin-7-like {ECO:0000313|RefSeq:XP_008451038.1};	Calmodulin and related proteins (EF-Hand superfamily)	GO:0005509,calcium ion binding	PF00036.32:EF hand
gene-LOC110091894	303	384	372	344	515	416	NW_021319588.1	389050	402350	-	LOC110091894	--	K00109 2-hydroxyglutarate dehydrogenase [EC:1.1.99.2] | (RefSeq) L-2-hydroxyglutarate dehydrogenase, mitochondrial isoform X1 (A)	ko00650: Butanoate metabolism	2-hydroxyglutarate dehydrogenase [Dendrobium catenatum]	RecName: Full=L-2-hydroxyglutarate dehydrogenase, mitochondrial {ECO:0000305}; EC=1.1.99.2 {ECO:0000269|PubMed:26203119}; Flags: Precursor;	SubName: Full=2-hydroxyglutarate dehydrogenase {ECO:0000313|EMBL:PKU70127.1};	Predicted FAD-dependent oxidoreductase	GO:0005739,mitochondrion; GO:0003973,(S)-2-hydroxy-acid oxidase activity; GO:0047545,2-hydroxyglutarate dehydrogenase activity; GO:0071949,FAD binding	PF01266.24:FAD dependent oxidoreductase
gene-LOC110091895	0	1	1	0	0	2	NW_021319588.1	585975	608098	-	LOC110091895	--	--	--	uncharacterized protein LOC110091895 isoform X1 [Dendrobium catenatum]	--	SubName: Full=Uncharacterized protein {ECO:0000313|EMBL:PKU70133.1};	--	--	--
gene-LOC110091896	197	196	259	461	468	284	NW_021319588.1	663854	679738	-	LOC110091896	--	K19199 histone-lysine N-methyltransferase SETD3 [EC:2.1.1.43] | (RefSeq) uncharacterized protein LOC110091896 isoform X1 (A)	--	uncharacterized protein LOC110091896 isoform X1 [Dendrobium catenatum]	RecName: Full=[Fructose-bisphosphate aldolase]-lysine N-methyltransferase, chloroplastic; EC=2.1.1.259; AltName: Full=Aldolases N-methyltransferase; AltName: Full=[Ribulose-bisphosphate carboxylase]-lysine N-methyltransferase-like; Short=AtLSMT-L; Short=LSMT-like enzyme; Flags: Precursor;	SubName: Full=[Fructose-bisphosphate aldolase]-lysine N-methyltransferase, chloroplastic {ECO:0000313|EMBL:PKU70135.1};	--	GO:0009507,chloroplast; GO:0009570,chloroplast stroma; GO:0030785,[ribulose-bisphosphate carboxylase]-lysine N-methyltransferase activity; GO:0016279,protein-lysine N-methyltransferase activity; GO:0018026,peptidyl-lysine monomethylation; GO:0018023,peptidyl-lysine trimethylation	PF00856.28:SET domain
gene-LOC110091897	4	5	7	0	0	0	NW_021319588.1	94690	97514	+	LOC110091897	--	K09419 heat shock transcription factor, other eukaryote | (RefSeq) heat stress transcription factor B-4b-like (A)	--	heat stress transcription factor B-4b-like [Dendrobium catenatum]	RecName: Full=Heat stress transcription factor B-4b; AltName: Full=Heat stress transcription factor 12; Short=OsHSF12; Short=rHsf12; AltName: Full=Heat stress transcription factor 19; Short=OsHsf-19;	SubName: Full=Heat stress transcription factor B-4b {ECO:0000313|EMBL:PKU70117.1};	Heat shock transcription factor	GO:0005634,nucleus; GO:0003700,DNA-binding transcription factor activity; GO:0042802,identical protein binding; GO:0043565,sequence-specific DNA binding; GO:0006351,transcription, DNA-templated	PF00447.17:HSF-type DNA-binding
gene-LOC110091898	198	231	271	345	405	512	NW_021319588.1	27870	60675	-	LOC110091898	--	K03500 16S rRNA (cytosine967-C5)-methyltransferase [EC:2.1.1.176] | (RefSeq) uncharacterized protein LOC110091898 isoform X1 (A)	--	uncharacterized protein LOC110091898 isoform X1 [Dendrobium catenatum]	--	SubName: Full=16S rRNA (Cytosine967-C5)-methyltransferase {ECO:0000313|EMBL:PKU70115.1};	tRNA and rRNA cytosine-C5-methylase (nucleolar protein NOL1/NOP2)	--	PF01189.17:16S rRNA methyltransferase RsmB/F
gene-LOC110091899	535	537	669	704	787	446	NW_021319588.1	66338	78749	+	LOC110091899	--	K08490 syntaxin 5 | (RefSeq) syntaxin-32 (A)	ko04130: SNARE interactions in vesicular transport	syntaxin-32 [Dendrobium catenatum]	RecName: Full=Syntaxin-32; Short=AtSYP32;	SubName: Full=Syntaxin-32 {ECO:0000313|EMBL:PKU70116.1};	SNARE protein SED5/Syntaxin 5	GO:0000139,Golgi membrane; GO:0016021,integral component of membrane; GO:0031201,SNARE complex; GO:0005484,SNAP receptor activity; GO:0000149,SNARE binding; GO:0006888,ER to Golgi vesicle-mediated transport; GO:0006886,intracellular protein transport; GO:0048278,vesicle docking; GO:0006906,vesicle fusion	PF05739.19:SNARE domain
gene-LOC110091900	156	190	214	137	92	67	NW_021318893.1	115236	139144	-	LOC110091900	--	K11138 telomere-associated protein RIF1 | (RefSeq) uncharacterized LOC105782940 (A)	--	uncharacterized protein LOC110091900 isoform X1 [Dendrobium catenatum]	--	SubName: Full=Uncharacterized protein {ECO:0000313|EMBL:PKU81393.1};	--	--	PF12231.8:Rap1-interacting factor 1 N terminal
gene-LOC110091901	1335	2647	1675	2450	2993	2941	NW_021319588.1	489441	508258	+	LOC110091901	--	--	--	uncharacterized protein LOC110091901 [Dendrobium catenatum]	--	SubName: Full=Uncharacterized protein {ECO:0000313|EMBL:PKU70130.1};	--	--	PF11460.8:Protein of unknown function (DUF3007)
gene-LOC110091902	262	238	399	511	593	349	NW_021319588.1	316892	377107	-	LOC110091902	--	K12818 ATP-dependent RNA helicase DHX8/PRP22 [EC:3.6.4.13] | (RefSeq) hypothetical protein (A)	ko03040: Spliceosome	protein ZINC INDUCED FACILITATOR-LIKE 1-like isoform X1 [Dendrobium catenatum]	RecName: Full=Protein ZINC INDUCED FACILITATOR-LIKE 1; AltName: Full=Protein ZIF-LIKE 1;	SubName: Full=Protein ZINC INDUCED FACILITATOR-LIKE 1 {ECO:0000313|EMBL:PKU70126.1};	Permease of the major facilitator superfamily	GO:0016021,integral component of membrane; GO:0009705,plant-type vacuole membrane; GO:0005886,plasma membrane; GO:0022821,potassium ion antiporter activity; GO:0010540,basipetal auxin transport; GO:0009630,gravitropism; GO:0090333,regulation of stomatal closure; GO:0080167,response to karrikin; GO:0009414,response to water deprivation; GO:0048364,root development	PF07690.16:Major Facilitator Superfamily
gene-LOC110091903	343	364	420	539	685	453	NW_021361869.1	46332	66831	-	LOC110091903	--	K00472 prolyl 4-hydroxylase [EC:1.14.11.2] | (RefSeq) probable prolyl 4-hydroxylase 6 (A)	ko00330: Arginine and proline metabolism	probable prolyl 4-hydroxylase 6 [Dendrobium catenatum]	RecName: Full=Probable prolyl 4-hydroxylase 7 {ECO:0000305}; Short=AtP4H7 {ECO:0000303|Ref.5}; EC=1.14.11.2 {ECO:0000305};	SubName: Full=Prolyl 4-hydroxylase {ECO:0000313|EMBL:PKU62443.1};	Prolyl 4-hydroxylase alpha subunit	GO:0005789,endoplasmic reticulum membrane; GO:0016021,integral component of membrane; GO:0005506,iron ion binding; GO:0031418,L-ascorbic acid binding; GO:0004656,procollagen-proline 4-dioxygenase activity	PF13640.6:2OG-Fe(II) oxygenase superfamily
gene-LOC110091904	1	3	0	0	0	0	NW_021425621.1	35	1229	-	LOC110091904	--	K22733 magnesium transporter | (RefSeq) probable magnesium transporter NIPA1 (A)	--	uncharacterized protein LOC110091904, partial [Dendrobium catenatum]	--	SubName: Full=Uncharacterized protein {ECO:0000313|EMBL:PKU81479.1};	FOG: Transposon-encoded proteins with TYA, reverse transcriptase, integrase domains in various combinations	--	PF08284.11:Retroviral aspartyl protease
gene-LOC110091905	159	147	162	102	53	114	NW_021318629.1	3936	6838	-	LOC110091905	--	K19090 CRISPR-associated protein Cas5t | (RefSeq) putative pentatricopeptide repeat-containing protein At3g05240 (A)	--	Pentatricopeptide repeat-containing protein [Dendrobium catenatum]	RecName: Full=Pentatricopeptide repeat-containing protein At1g03540;	SubName: Full=Pentatricopeptide repeat-containing protein {ECO:0000313|EMBL:PKU85181.1};	FOG: PPR repeat	GO:0043231,intracellular membrane-bounded organelle; GO:0004519,endonuclease activity; GO:0003723,RNA binding; GO:0009451,RNA modification	PF01535.20:PPR repeat
gene-LOC110091906	400	307	465	162	255	346	NW_021383819.1	29166	34553	+	LOC110091906	--	K00655 1-acyl-sn-glycerol-3-phosphate acyltransferase [EC:2.3.1.51] | (RefSeq) uncharacterized protein LOC105166581 (A)	ko00561: Glycerolipid metabolism; ko00564: Glycerophospholipid metabolism	multiple organellar RNA editing factor 2, chloroplastic-like [Dendrobium catenatum]	RecName: Full=Multiple organellar RNA editing factor 2, chloroplastic {ECO:0000305}; AltName: Full=Protein DIFFERENTIATION AND GREENING-like 1 {ECO:0000303|PubMed:12678554}; Short=Protein DAG-like 1 {ECO:0000305}; AltName: Full=RNA editing-interacting protein 2 {ECO:0000303|PubMed:23818871}; Flags: Precursor;	SubName: Full=DAG protein, chloroplastic {ECO:0000313|EMBL:PKU62129.1};	--	GO:0009507,chloroplast; GO:0006397,mRNA processing	--
gene-LOC110091907	7	16	4	12	9	1	NW_021318595.1	178897	182894	-	LOC110091907	--	--	--	rho guanine nucleotide exchange factor 8-like [Dendrobium catenatum]	RecName: Full=Rho guanine nucleotide exchange factor 8 {ECO:0000303|PubMed:15980860}; Short=AtRopGEF8 {ECO:0000303|PubMed:15980860}; AltName: Full=Rho of plants guanine nucleotide exchange factor 8 {ECO:0000303|PubMed:15980860};	SubName: Full=Rho guanine nucleotide exchange factor 8 {ECO:0000313|EMBL:PKU85921.1};	--	GO:0005886,plasma membrane; GO:0005085,guanyl-nucleotide exchange factor activity; GO:0042802,identical protein binding; GO:0005089,Rho guanyl-nucleotide exchange factor activity	PF03759.13:PRONE (Plant-specific Rop nucleotide exchanger)
gene-LOC110091908	11	6	13	22	42	51	--	--	--	--	--	--	--	--
gene-LOC110091909	5	7	10	5	33	25	NW_021318595.1	18937	24087	-	LOC110091909	--	--	--	LOW QUALITY PROTEIN: cytochrome b561 and DOMON domain-containing protein At3g61750-like [Dendrobium catenatum]	RecName: Full=Cytochrome b561 and DOMON domain-containing protein At3g61750; AltName: Full=Protein b561A.tha9; Flags: Precursor;	SubName: Full=Uncharacterized protein {ECO:0000313|EMBL:PKU69443.1};	Predicted membrane protein, contains DoH and Cytochrome b-561/ferric reductase transmembrane domains	GO:0016021,integral component of membrane; GO:0046872,metal ion binding; GO:0055114,oxidation-reduction process	PF03351.17:DOMON domain
gene-LOC110091910	1178	969	1492	879	1320	712	NW_021318595.1	240269	244786	-	LOC110091910	--	K12818 ATP-dependent RNA helicase DHX8/PRP22 [EC:3.6.4.13] | (RefSeq) probable pre-mRNA-splicing factor ATP-dependent RNA helicase DEAH5 (A)	ko03040: Spliceosome	probable pre-mRNA-splicing factor ATP-dependent RNA helicase DEAH5 [Dendrobium catenatum]	RecName: Full=Probable pre-mRNA-splicing factor ATP-dependent RNA helicase DEAH5 {ECO:0000305}; EC=3.6.4.13; AltName: Full=DEAH RNA helicase homolog PRP22 {ECO:0000303|PubMed:17008405};	SubName: Full=Putative pre-mRNA-splicing factor ATP-dependent RNA helicase {ECO:0000313|EMBL:PKU85925.1};	DEAH-box RNA helicase	GO:0005737,cytoplasm; GO:0005829,cytosol; GO:0005739,mitochondrion; GO:0009506,plasmodesma; GO:0005681,spliceosomal complex; GO:0005524,ATP binding; GO:0004004,ATP-dependent RNA helicase activity; GO:0003729,mRNA binding; GO:0003723,RNA binding; GO:0000398,mRNA splicing, via spliceosome	PF07717.16:Oligonucleotide/oligosaccharide-binding (OB)-fold
gene-LOC110091911	1840	1830	2310	1841	2465	1243	NW_021318595.1	199225	220980	-	LOC110091911	--	--	--	uncharacterized protein LOC110091911 isoform X2 [Dendrobium catenatum]	--	SubName: Full=Uncharacterized protein {ECO:0000313|EMBL:PKU85923.1};	--	--	PF04278.12:Tic22-like family
gene-LOC110091912	198	238	235	270	187	135	NW_021318595.1	122709	168134	-	LOC110091912	--	K10527 enoyl-CoA hydratase/3-hydroxyacyl-CoA dehydrogenase [EC:4.2.1.17 1.1.1.35 1.1.1.211] | (RefSeq) peroxisomal fatty acid beta-oxidation multifunctional protein-like (A)	ko00071: Fatty acid degradation; ko00592: alpha-Linolenic acid metabolism; ko01212: Fatty acid metabolism	peroxisomal fatty acid beta-oxidation multifunctional protein-like [Dendrobium catenatum]	RecName: Full=Peroxisomal fatty acid beta-oxidation multifunctional protein; Short=MFP; Includes: RecName: Full=Enoyl-CoA hydratase/3-2-trans-enoyl-CoA isomerase/3-hydroxybutyryl-CoA epimerase; EC=4.2.1.17; EC=5.1.2.3; EC=5.3.3.8; Includes: RecName: Full=3-hydroxyacyl-CoA dehydrogenase; EC=1.1.1.35;	SubName: Full=peroxisomal fatty acid beta-oxidation multifunctional protein-like {ECO:0000313|RefSeq:XP_008775812.1};	Hydroxyacyl-CoA dehydrogenase/enoyl-CoA hydratase	GO:0005874,microtubule; GO:0005777,peroxisome; GO:0018812,3-hydroxyacyl-CoA dehydratase activity; GO:0003857,3-hydroxyacyl-CoA dehydrogenase activity; GO:0008692,3-hydroxybutyryl-CoA epimerase activity; GO:0004165,dodecenoyl-CoA delta-isomerase activity; GO:0004300,enoyl-CoA hydratase activity; GO:0008017,microtubule binding; GO:0003729,mRNA binding; GO:0006635,fatty acid beta-oxidation	PF02737.18:3-hydroxyacyl-CoA dehydrogenase, NAD binding domain
gene-LOC110091913	36	21	37	5	7	15	NW_021318595.1	109737	110431	+	LOC110091913	--	--	--	--	--	--	--	--	--
gene-LOC110091914	344	374	419	215	286	269	NW_021318595.1	90912	104416	-	LOC110091914	--	K10527 enoyl-CoA hydratase/3-hydroxyacyl-CoA dehydrogenase [EC:4.2.1.17 1.1.1.35 1.1.1.211] | (RefSeq) peroxisomal fatty acid beta-oxidation multifunctional protein-like isoform X1 (A)	ko00071: Fatty acid degradation; ko00592: alpha-Linolenic acid metabolism; ko01212: Fatty acid metabolism	peroxisomal fatty acid beta-oxidation multifunctional protein-like isoform X1 [Dendrobium catenatum]	RecName: Full=Peroxisomal fatty acid beta-oxidation multifunctional protein; Short=MFP; Includes: RecName: Full=Enoyl-CoA hydratase/3-2-trans-enoyl-CoA isomerase/3-hydroxybutyryl-CoA epimerase; EC=4.2.1.17; EC=5.1.2.3; EC=5.3.3.8; Includes: RecName: Full=3-hydroxyacyl-CoA dehydrogenase; EC=1.1.1.35;	SubName: Full=Peroxisomal fatty acid beta-oxidation multifunctional protein {ECO:0000313|EMBL:PKU85919.1};	Hydroxyacyl-CoA dehydrogenase/enoyl-CoA hydratase	GO:0005874,microtubule; GO:0005777,peroxisome; GO:0018812,3-hydroxyacyl-CoA dehydratase activity; GO:0003857,3-hydroxyacyl-CoA dehydrogenase activity; GO:0008692,3-hydroxybutyryl-CoA epimerase activity; GO:0004165,dodecenoyl-CoA delta-isomerase activity; GO:0004300,enoyl-CoA hydratase activity; GO:0008017,microtubule binding; GO:0003729,mRNA binding; GO:0006635,fatty acid beta-oxidation	PF02737.18:3-hydroxyacyl-CoA dehydrogenase, NAD binding domain
gene-LOC110091915	20	42	35	14	11	3	NW_021318595.1	31696	33610	+	LOC110091915	--	--	--	protein PLANT CADMIUM RESISTANCE 8-like [Dendrobium catenatum]	RecName: Full=Protein PLANT CADMIUM RESISTANCE 8; Short=AtPCR8;	SubName: Full=Protein PLANT CADMIUM RESISTANCE 8 {ECO:0000313|EMBL:PKU85915.1};	--	GO:0016021,integral component of membrane; GO:0005886,plasma membrane; GO:0006979,response to oxidative stress	PF04749.17:PLAC8 family
gene-LOC110091916	302	299	341	243	310	279	NW_021318595.1	190270	197412	+	LOC110091916	--	K11338 RuvB-like protein 2 [EC:3.6.4.12] | (RefSeq) ruvB-like 2 (A)	--	ruvB-like 2 [Dendrobium catenatum]	RecName: Full=RuvB-like protein 1; EC=3.6.4.12; AltName: Full=49 kDa TATA box-binding protein-interacting protein homolog; Short=AtTIP49a; AltName: Full=Ruv DNA-helicase-like protein;	SubName: Full=RuvB-like protein 2 {ECO:0000313|EMBL:PKU85922.1};	DNA helicase TIP49, TBP-interacting protein	GO:0009507,chloroplast; GO:0005829,cytosol; GO:0031011,Ino80 complex; GO:0035267,NuA4 histone acetyltransferase complex; GO:0005730,nucleolus; GO:0005634,nucleus; GO:0097255,R2TP complex; GO:0000812,Swr1 complex; GO:0005524,ATP binding; GO:0043141,ATP-dependent 5'-3' DNA helicase activity; GO:0004003,ATP-dependent DNA helicase activity; GO:0000492,box C/D snoRNP assembly; GO:0030154,cell differen…	PF06068.13:TIP49 P-loop domain
gene-LOC110091917	34	29	42	153	126	84	NW_021318595.1	83964	86862	-	LOC110091917	--	K10727 chromatin licensing and DNA replication factor 1 | (RefSeq) CDT1-like protein a, chloroplastic (A)	--	CDT1-like protein a, chloroplastic [Dendrobium catenatum]	RecName: Full=CDT1-like protein a, chloroplastic; Short=AtCDT1a; Flags: Precursor;	SubName: Full=CDT1-like protein a, chloroplastic {ECO:0000313|EMBL:PKU85918.1};	DNA replication factor	GO:0009507,chloroplast; GO:0005634,nucleus; GO:0004693,cyclin-dependent protein serine/threonine kinase activity; GO:0070182,DNA polymerase binding; GO:0019901,protein kinase binding; GO:0007049,cell cycle; GO:0009658,chloroplast organization; GO:0051276,chromosome organization; GO:0006260,DNA replication; GO:0000076,DNA replication checkpoint; GO:0048229,gametophyte development	PF16679.5:DNA replication factor Cdt1 C-terminal domain
gene-LOC110091918	1398	1530	1541	1948	2494	2838	NW_021318595.1	34529	83951	-	LOC110091918	--	K08150 MFS transporter, SP family, solute carrier family 2 (myo-inositol transporter), member 13 | (RefSeq) inositol transporter 1-like (A)	--	probable plastidic glucose transporter 2 isoform X1 [Dendrobium catenatum]	RecName: Full=Probable plastidic glucose transporter 2;	SubName: Full=Putative plastidic glucose transporter 3 {ECO:0000313|EMBL:PKA63461.1};	Predicted transporter (major facilitator superfamily)	GO:0031969,chloroplast membrane; GO:0016021,integral component of membrane; GO:0022857,transmembrane transporter activity; GO:0008643,carbohydrate transport	PF00083.24:Sugar (and other) transporter
gene-LOC110091919	123	131	182	147	205	126	NW_021318980.1	83111	95839	+	LOC110091919	--	K18342 OTU domain-containing protein 6 [EC:3.4.19.12] | (RefSeq) OTU domain-containing protein At3g57810-like isoform X1 (A)	--	OTU domain-containing protein At3g57810-like isoform X1 [Dendrobium catenatum]	RecName: Full=OTU domain-containing protein At3g57810;	SubName: Full=OTU domain-containing protein {ECO:0000313|EMBL:PKU80509.1};	OTU (ovarian tumor)-like cysteine protease	GO:0009507,chloroplast	PF02338.19:OTU-like cysteine protease
gene-LOC110091921	1072	1307	1323	1735	1913	1285	NW_021318980.1	98116	110999	-	LOC110091921	--	K13096 splicing factor 4 | (RefSeq) SURP and G-patch domain-containing protein 1-like protein (A)	--	SURP and G-patch domain-containing protein 1-like protein [Dendrobium catenatum]	RecName: Full=SURP and G-patch domain-containing protein 1-like protein; AltName: Full=Splicing factor 4-like protein; Short=SF4-like protein;	SubName: Full=SURP and G-patch domain-containing protein 1-like protein {ECO:0000313|EMBL:PKU80510.1};	Predicted RNA-binding protein, contains SWAP and G-patch domains	GO:0005634,nucleus; GO:0003723,RNA binding; GO:0006397,mRNA processing; GO:0008380,RNA splicing	PF01585.23:G-patch domain
gene-LOC110091922	3110	2850	3801	5204	6854	4297	NW_021318980.1	27057	31459	+	LOC110091922	--	K14445 solute carrier family 13 (sodium-dependent dicarboxylate transporter), member 2/3/5 | (RefSeq) tonoplast dicarboxylate transporter (A)	--	tonoplast dicarboxylate transporter [Dendrobium catenatum]	RecName: Full=Tonoplast dicarboxylate transporter; Short=AttDT; AltName: Full=Sodium-dicarboxylate cotransporter-like; Short=AtSDAT; AltName: Full=Vacuolar malate transporter;	SubName: Full=Tonoplast dicarboxylate transporter {ECO:0000313|EMBL:PKU80504.1};	Na+/dicarboxylate, Na+/tricarboxylate and phosphate transporters	GO:0016021,integral component of membrane; GO:0005774,vacuolar membrane; GO:0005773,vacuole; GO:0015140,malate transmembrane transporter activity; GO:0015743,malate transport; GO:0051453,regulation of intracellular pH; GO:0006814,sodium ion transport	PF00939.19:Sodium:sulfate symporter transmembrane region
gene-LOC110091923	81	83	126	68	77	51	NW_021318980.1	52660	53809	-	LOC110091923	--	--	--	uncharacterized protein LOC110091923 [Dendrobium catenatum]	--	SubName: Full=Uncharacterized protein {ECO:0000313|EMBL:PKU80507.1};	--	--	--
gene-LOC110091924	138	107	286	172	104	106	NW_021318980.1	70992	77325	+	LOC110091924	--	K12309 beta-galactosidase [EC:3.2.1.23] | (Kazusa) Lj3g3v0323160.2; - (A)	ko00052: Galactose metabolism; ko00511: Other glycan degradation; ko00531: Glycosaminoglycan degradation; ko00600: Sphingolipid metabolism; ko00604: Glycosphingolipid biosynthesis - ganglio series	zinc finger protein WIP2-like [Dendrobium catenatum]	RecName: Full=Zinc finger protein WIP2; AltName: Full=Protein NO TRANSMITTING TRACT; AltName: Full=WIP-domain protein 2 {ECO:0000303|PubMed:11782451}; Short=AtWIP2 {ECO:0000303|PubMed:11782451};	SubName: Full=Protein TRANSPARENT TESTA 1 {ECO:0000313|EMBL:PKU80508.1};	FOG: Zn-finger	GO:0005634,nucleus; GO:0003700,DNA-binding transcription factor activity; GO:0046872,metal ion binding; GO:0003676,nucleic acid binding; GO:0001709,cell fate determination; GO:1990058,fruit replum development; GO:0009860,pollen tube growth; GO:0010468,regulation of gene expression; GO:0006355,regulation of transcription, DNA-templated; GO:0006351,transcription, DNA-templated; GO:0010500,transmitt…	PF00096.26:Zinc finger, C2H2 type
gene-LOC110091925	341	287	415	347	380	262	NW_021318980.1	42524	49476	+	LOC110091925	--	K03714 glycoprotein 2-beta-D-xylosyltransferase [EC:2.4.2.38] | (RefSeq) beta-(1,2)-xylosyltransferase-like (A)	ko00513: Various types of N-glycan biosynthesis	Beta-(1,2)-xylosyltransferase [Dendrobium catenatum]	RecName: Full=Beta-(1,2)-xylosyltransferase; EC=2.4.2.38;	SubName: Full=Beta-(1,2)-xylosyltransferase {ECO:0000313|EMBL:PKU80505.1};	Uncharacterized conserved protein	GO:0005794,Golgi apparatus; GO:0032580,Golgi cisterna membrane; GO:0005797,Golgi medial cisterna; GO:0000139,Golgi membrane; GO:0016021,integral component of membrane; GO:0050513,glycoprotein 2-beta-D-xylosyltransferase activity; GO:0042285,xylosyltransferase activity; GO:0031204,posttranslational protein targeting to membrane, translocation; GO:0006487,protein N-linked glycosylation	PF04577.14:Protein of unknown function (DUF563)
gene-LOC110091928	375	452	474	480	802	559	NW_021357095.1	2759	10015	-	LOC110091928	--	K12832 splicing factor 3B subunit 5 | (RefSeq) uncharacterized protein At4g14342 (A)	ko03040: Spliceosome	uncharacterized protein At4g14342 [Dendrobium catenatum]	RecName: Full=Uncharacterized protein At4g14342;	SubName: Full=Splicing factor 3B, subunit 5 {ECO:0000313|EMBL:KVH94611.1};	Uncharacterized conserved protein	GO:0071011,precatalytic spliceosome; GO:0005689,U12-type spliceosomal complex; GO:0005686,U2 snRNP; GO:0000398,mRNA splicing, via spliceosome	PF07189.11:Splicing factor 3B subunit 10 (SF3b10)
gene-LOC110091930	4	9	14	13	5	0	NW_021318775.1	3464278	3465549	-	LOC110091930	--	--	--	S-type anion channel SLAH1-like [Dendrobium catenatum]	RecName: Full=S-type anion channel SLAH4; AltName: Full=SLAC1-homolog protein 4;	SubName: Full=S-type anion channel SLAH1-like {ECO:0000313|RefSeq:XP_008784481.1};	--	GO:0016021,integral component of membrane; GO:0005886,plasma membrane; GO:0008308,voltage-gated anion channel activity; GO:0006873,cellular ion homeostasis	PF03595.17:Voltage-dependent anion channel
gene-LOC110091931	3	1	1	11	20	31	NW_021318775.1	3462449	3463027	+	LOC110091931	--	--	--	uncharacterized protein LOC110109933 [Dendrobium catenatum]	--	SubName: Full=Uncharacterized protein {ECO:0000313|EMBL:PKU83269.1};	--	--	PF04398.12:Protein of unknown function, DUF538
gene-LOC110091932	387	440	436	624	767	894	NW_021399148.1	1413	1899	+	LOC110091932	--	--	--	homeobox protein knotted-1-like LET12, partial [Dendrobium catenatum]	RecName: Full=Homeobox protein knotted-1-like LET12;	SubName: Full=homeobox protein knotted-1-like LET12 isoform X1 {ECO:0000313|RefSeq:XP_008806312.1};	Transcription factor MEIS1 and related HOX domain proteins	GO:0005634,nucleus; GO:0003677,DNA binding; GO:0006355,regulation of transcription, DNA-templated	PF03789.13:ELK domain
gene-LOC110091933	5	6	13	16	65	41	NW_021318893.1	428510	429336	+	LOC110091933	--	K09419 heat shock transcription factor, other eukaryote | (RefSeq) heat stress transcription factor B-1-like (A)	--	heat stress transcription factor B-1-like [Dendrobium catenatum]	RecName: Full=Heat stress transcription factor B-1; AltName: Full=Heat stress transcription factor 23; Short=OsHsf-23;	SubName: Full=heat stress transcription factor B-1-like {ECO:0000313|RefSeq:XP_008797267.1};	--	GO:0005737,cytoplasm; GO:0005634,nucleus; GO:0003700,DNA-binding transcription factor activity; GO:0043565,sequence-specific DNA binding; GO:0045892,negative regulation of transcription, DNA-templated; GO:0009408,response to heat; GO:0006351,transcription, DNA-templated	--
gene-LOC110091934	87	96	98	93	105	69	NW_021318470.1	224221	233085	+	LOC110091934	--	--	--	OPA3-like protein isoform X1 [Dendrobium catenatum]	--	SubName: Full=Uncharacterized protein {ECO:0000313|EMBL:PKU88037.1};	Predicted coiled-coil protein	--	PF07047.12:Optic atrophy 3 protein (OPA3)
gene-LOC110091935	822	925	1033	1714	1982	1705	NW_021318470.1	290024	308855	+	LOC110091935	--	--	--	28 kDa heat- and acid-stable phosphoprotein isoform X2 [Dendrobium catenatum]	--	SubName: Full=Uncharacterized protein {ECO:0000313|EMBL:CBI30632.3};	Phosphoprotein/predicted coiled-coil protein	--	PF10252.9:Casein kinase substrate phosphoprotein PP28
gene-LOC110091936	492	539	519	733	810	928	NW_021318470.1	310727	315439	-	LOC110091936	--	K07904 Ras-related protein Rab-11A | (RefSeq) ras-related protein RABA1f (A)	ko04144: Endocytosis	ras-related protein RABA1f [Dendrobium catenatum]	RecName: Full=Ras-related protein RABA1f; Short=AtRABA1f;	SubName: Full=Ras-related protein RABA1f {ECO:0000313|EMBL:PKU88042.1};	GTPase Rab11/YPT3, small G protein superfamily	GO:0005768,endosome; GO:0005886,plasma membrane; GO:0005525,GTP binding; GO:0003924,GTPase activity; GO:0015031,protein transport	PF00071.22:Ras family
gene-LOC110091937	1172	1298	1360	981	1097	1263	NW_021318470.1	319364	361117	-	LOC110091937	--	K06207 GTP-binding protein | (RefSeq) uncharacterized protein LOC110091937 (A)	--	uncharacterized protein LOC110091937 [Dendrobium catenatum]	RecName: Full=Putative elongation factor TypA-like SVR3, chloroplastic; AltName: Full=Protein HAPPY ON NORFLURAZON 23 {ECO:0000303|PubMed:21208309}; AltName: Full=Protein SUPPRESSOR OF VARIEGATION 3 {ECO:0000303|PubMed:21187014}; Flags: Precursor;	SubName: Full=GTP-binding protein TypA/BipA homolog {ECO:0000313|RefSeq:XP_008798288.1};	Elongation factor-type GTP-binding protein	GO:0009507,chloroplast; GO:0005525,GTP binding; GO:0003924,GTPase activity; GO:0003746,translation elongation factor activity; GO:0050821,protein stabilization; GO:0009409,response to cold; GO:0006364,rRNA processing	PF00009.27:Elongation factor Tu GTP binding domain
gene-LOC110091938	0	0	0	0	4	0	NW_021318470.1	31604	33367	+	LOC110091938	--	K07203 serine/threonine-protein kinase mTOR [EC:2.7.11.1] | (RefSeq) serine/threonine-protein kinase TOR-like (A)	ko04136: Autophagy - other	uncharacterized protein LOC110091938 [Dendrobium catenatum]	RecName: Full=RNA-directed DNA polymerase homolog; EC=2.7.7.48; AltName: Full=Reverse transcriptase homolog;	SubName: Full=Putative mitochondrial protein {ECO:0000313|EMBL:PKU61034.1};	FOG: Transposon-encoded proteins with TYA, reverse transcriptase, integrase domains in various combinations	GO:0005739,mitochondrion; GO:0003968,RNA-directed 5'-3' RNA polymerase activity; GO:0003964,RNA-directed DNA polymerase activity	PF17919.1:RNase H-like domain found in reverse transcriptase
gene-LOC110091939	1688	1462	1712	1341	1973	1592	NW_021318470.1	112584	160104	+	LOC110091939	--	K18660 malonyl-CoA/methylmalonyl-CoA synthetase [EC:6.2.1.-] | (RefSeq) malonate--CoA ligase (A)	ko00061: Fatty acid biosynthesis; ko00280: Valine, leucine and isoleucine degradation; ko01212: Fatty acid metabolism	malonate--CoA ligase [Dendrobium catenatum]	RecName: Full=Malonate--CoA ligase; EC=6.2.1.n3; AltName: Full=Acyl-activating enzyme 13; AltName: Full=Malonyl-CoA synthetase;	SubName: Full=malonate--CoA ligase isoform X2 {ECO:0000313|RefSeq:XP_008452305.1};	Acyl-CoA synthetase	GO:0005829,cytosol; GO:0016020,membrane; GO:0005739,mitochondrion; GO:0005634,nucleus; GO:0090409,malonyl-CoA synthetase activity; GO:0006633,fatty acid biosynthetic process; GO:0090410,malonate catabolic process	PF00501.28:AMP-binding enzyme
gene-LOC110091941	1261	1285	1525	2236	2892	2312	NW_021318470.1	411280	420377	-	LOC110091941	--	K04371 mitogen-activated protein kinase 1/3 [EC:2.7.11.24] | (RefSeq) mitogen-activated protein kinase 20 isoform X1 (A)	--	mitogen-activated protein kinase 10-like [Dendrobium catenatum]	RecName: Full=Mitogen-activated protein kinase 10; Short=MAP kinase 10; EC=2.7.11.24;	SubName: Full=Mitogen-activated protein kinase 10 {ECO:0000313|EMBL:PKU88050.1};	Mitogen-activated protein kinase	GO:0005737,cytoplasm; GO:0005634,nucleus; GO:0005524,ATP binding; GO:0004707,MAP kinase activity; GO:0010468,regulation of gene expression	PF00069.25:Protein kinase domain
gene-LOC110091942	375	479	444	469	583	456	NW_021318470.1	257582	285347	+	LOC110091942	--	--	--	transcription factor VOZ1 isoform X1 [Dendrobium catenatum]	RecName: Full=Transcription factor VOZ1; AltName: Full=Protein VASCULAR PLANT ONE-ZINC FINGER 1; Short=AtVOZ1;	SubName: Full=Transcription factor VOZ1 {ECO:0000313|EMBL:PKU88041.1};	--	GO:0005737,cytoplasm; GO:0005634,nucleus; GO:0046872,metal ion binding; GO:0043565,sequence-specific DNA binding; GO:0009631,cold acclimation; GO:0009816,defense response to bacterium, incompatible interaction; GO:0048574,long-day photoperiodism, flowering; GO:0048578,positive regulation of long-day photoperiodism, flowering; GO:0045893,positive regulation of transcription, DNA-templated; GO:0009…	--
gene-LOC110091943	1067	939	1426	1439	1913	852	NW_021318470.1	396719	408775	+	LOC110091943	--	K17616 CTD small phosphatase-like protein 2 [EC:3.1.3.-] | (RefSeq) uncharacterized protein LOC110091943 (A)	--	uncharacterized protein LOC110091943 [Dendrobium catenatum]	RecName: Full=Mitochondrial import inner membrane translocase subunit TIM50; AltName: Full=NIF domain protein 3; Flags: Precursor;	SubName: Full=Mitochondrial import inner membrane translocase subunit TIM50 {ECO:0000313|EMBL:PKU88049.1};	TFIIF-interacting CTD phosphatase, including NLI-interacting factor (involved in RNA polymerase II regulation)	GO:0016021,integral component of membrane; GO:0005744,TIM23 mitochondrial import inner membrane translocase complex; GO:0015031,protein transport	PF03031.18:NLI interacting factor-like phosphatase
gene-LOC110091944	411	380	436	239	278	311	NW_021318470.1	247578	249821	-	LOC110091944	--	K15196 transcription factor IIIB 90 kDa subunit | (RefSeq) plant-specific TFIIB-related protein PTF2 isoform X1 (A)	--	plant-specific TFIIB-related protein PTF2 [Dendrobium catenatum]	RecName: Full=Plant-specific TFIIB-related protein PTF2 {ECO:0000305}; AltName: Full=Protein POLLEN-EXPRESSED TRANSCRIPTION FACTOR 2 {ECO:0000303|PubMed:23713077}; AltName: Full=TFIIB-related protein PTF2 {ECO:0000305};	SubName: Full=Uncharacterized protein {ECO:0000313|EMBL:PKU88038.1};	Transcription initiation factor TFIIIB, Brf1 subunit	GO:0005634,nucleus; GO:0003690,double-stranded DNA binding; GO:0046872,metal ion binding; GO:0042803,protein homodimerization activity; GO:0070063,RNA polymerase binding; GO:0001093,TFIIB-class transcription factor binding; GO:0070897,transcription preinitiation complex assembly; GO:0009793,embryo development ending in seed dormancy; GO:0009846,pollen germination; GO:0006355,regulation of transcr…	PF08271.12:TFIIB zinc-binding
gene-LOC110091945	5459	6225	5530	9594	14714	12873	NW_021318470.1	165032	171653	-	LOC110091945	--	K11187 peroxiredoxin 5, atypical 2-Cys peroxiredoxin [EC:1.11.1.15] | (RefSeq) hypothetical protein (A)	ko04146: Peroxisome	peroxiredoxin-2C-like [Dendrobium catenatum]	RecName: Full=Peroxiredoxin-2C; EC=1.11.1.15; AltName: Full=Peroxiredoxin IIC; AltName: Full=Thioredoxin peroxidase 2C;	SubName: Full=Peroxiredoxin-2C {ECO:0000313|EMBL:PKU88035.1};	Alkyl hydroperoxide reductase/peroxiredoxin	GO:0005737,cytoplasm; GO:0004601,peroxidase activity; GO:0051920,peroxiredoxin activity; GO:0045454,cell redox homeostasis	PF08534.10:Redoxin
gene-LOC110091946	448	465	503	527	639	387	NW_021318470.1	183758	205879	-	LOC110091946	--	K17583 nucleolar MIF4G domain-containing protein 1 | (RefSeq) nucleolar MIF4G domain-containing protein 1 (A)	--	nucleolar MIF4G domain-containing protein 1 [Dendrobium catenatum]	--	SubName: Full=Uncharacterized protein {ECO:0000313|EMBL:PKU88036.1};	Protein involved in high osmolarity signaling pathway	--	PF02847.17:MA3 domain
gene-LOC110091947	731	686	1058	801	846	631	NW_021318470.1	97503	118963	+	LOC110091947	--	K12813 pre-mRNA-splicing factor ATP-dependent RNA helicase DHX16 [EC:3.6.4.13] | (RefSeq) pre-mRNA-splicing factor ATP-dependent RNA helicase DEAH1-like (A)	ko03040: Spliceosome	pre-mRNA-splicing factor ATP-dependent RNA helicase DEAH1-like [Dendrobium catenatum]	RecName: Full=Pre-mRNA-splicing factor ATP-dependent RNA helicase DEAH1 {ECO:0000305}; EC=3.6.4.13; AltName: Full=DEAH RNA helicase homolog PRP2 {ECO:0000303|PubMed:17008405}; AltName: Full=Protein EMBRYO DEFECTIVE 2733 {ECO:0000303|PubMed:15266054}; AltName: Full=Protein ENHANCED SILENCING PHENOTYPE 3 {ECO:0000303|PubMed:17008405};	SubName: Full=Putative pre-mRNA-splicing factor ATP-dependent RNA helicase {ECO:0000313|EMBL:PKU88029.1};	mRNA splicing factor ATP-dependent RNA helicase	GO:0005737,cytoplasm; GO:0016020,membrane; GO:0005681,spliceosomal complex; GO:0005524,ATP binding; GO:0004004,ATP-dependent RNA helicase activity; GO:0003723,RNA binding; GO:0000398,mRNA splicing, via spliceosome; GO:0035194,posttranscriptional gene silencing by RNA; GO:0008380,RNA splicing	PF04408.23:Helicase associated domain (HA2)
gene-LOC110091948	255	186	266	110	164	198	NW_021318470.1	63332	90654	+	LOC110091948	--	K12813 pre-mRNA-splicing factor ATP-dependent RNA helicase DHX16 [EC:3.6.4.13] | (RefSeq) pre-mRNA-splicing factor ATP-dependent RNA helicase DEAH1-like (A)	ko03040: Spliceosome	pre-mRNA-splicing factor ATP-dependent RNA helicase DEAH1-like, partial [Dendrobium catenatum]	RecName: Full=Pre-mRNA-splicing factor ATP-dependent RNA helicase DEAH1 {ECO:0000305}; EC=3.6.4.13; AltName: Full=DEAH RNA helicase homolog PRP2 {ECO:0000303|PubMed:17008405}; AltName: Full=Protein EMBRYO DEFECTIVE 2733 {ECO:0000303|PubMed:15266054}; AltName: Full=Protein ENHANCED SILENCING PHENOTYPE 3 {ECO:0000303|PubMed:17008405};	SubName: Full=Pre-mRNA-splicing factor ATP-dependent RNA helicase DHX16 {ECO:0000313|EMBL:PKU88028.1};	mRNA splicing factor ATP-dependent RNA helicase	GO:0005737,cytoplasm; GO:0016020,membrane; GO:0005681,spliceosomal complex; GO:0005524,ATP binding; GO:0004004,ATP-dependent RNA helicase activity; GO:0003723,RNA binding; GO:0000398,mRNA splicing, via spliceosome; GO:0035194,posttranscriptional gene silencing by RNA; GO:0008380,RNA splicing	PF01480.17:PWI domain
gene-LOC110091949	76	72	85	63	43	50	NW_021318470.1	113867	119448	+	LOC110091949	--	K18660 malonyl-CoA/methylmalonyl-CoA synthetase [EC:6.2.1.-] | (RefSeq) malonate--CoA ligase (A)	ko00061: Fatty acid biosynthesis; ko00280: Valine, leucine and isoleucine degradation; ko01212: Fatty acid metabolism	probable pre-mRNA-splicing factor ATP-dependent RNA helicase DEAH6 isoform X1 [Dendrobium catenatum]	RecName: Full=Pre-mRNA-splicing factor ATP-dependent RNA helicase DEAH1 {ECO:0000305}; EC=3.6.4.13; AltName: Full=DEAH RNA helicase homolog PRP2 {ECO:0000303|PubMed:17008405}; AltName: Full=Protein EMBRYO DEFECTIVE 2733 {ECO:0000303|PubMed:15266054}; AltName: Full=Protein ENHANCED SILENCING PHENOTYPE 3 {ECO:0000303|PubMed:17008405};	SubName: Full=pre-mRNA-splicing factor ATP-dependent RNA helicase DEAH1-like isoform X2 {ECO:0000313|RefSeq:XP_008775632.1};	mRNA splicing factor ATP-dependent RNA helicase	GO:0005737,cytoplasm; GO:0016020,membrane; GO:0005681,spliceosomal complex; GO:0005524,ATP binding; GO:0004004,ATP-dependent RNA helicase activity; GO:0003723,RNA binding; GO:0000398,mRNA splicing, via spliceosome; GO:0035194,posttranscriptional gene silencing by RNA; GO:0008380,RNA splicing	--
gene-LOC110091950	494	460	469	362	439	425	NW_021318470.1	370362	380530	-	LOC110091950	--	K00852 ribokinase [EC:2.7.1.15] | (RefSeq) uncharacterized protein LOC110091950 (A)	ko00030: Pentose phosphate pathway	uncharacterized protein LOC110091950 [Dendrobium catenatum]	RecName: Full=Probable fructokinase-2; EC=2.7.1.4;	SubName: Full=Fructokinase-1 {ECO:0000313|EMBL:PKU88045.1};	Ribokinase	GO:0005829,cytosol; GO:0009506,plasmodesma; GO:0005524,ATP binding; GO:0008865,fructokinase activity; GO:0006000,fructose metabolic process; GO:0019252,starch biosynthetic process	PF00294.24:pfkB family carbohydrate kinase
gene-LOC110091951	829	568	1044	742	772	542	NW_021320079.1	2362756	2366509	+	LOC110091951	--	K13420 LRR receptor-like serine/threonine-protein kinase FLS2 [EC:2.7.11.1] | (RefSeq) LRR receptor-like serine/threonine-protein kinase FLS2 (A)	ko04016: MAPK signaling pathway - plant; ko04626: Plant-pathogen interaction	LRR receptor-like serine/threonine-protein kinase RPK2 [Dendrobium catenatum]	RecName: Full=LRR receptor-like serine/threonine-protein kinase RPK2; EC=2.7.11.1; AltName: Full=Protein TOADSTOOL 2; AltName: Full=Receptor-like protein kinase 2; Flags: Precursor;	SubName: Full=LRR receptor-like serine/threonine-protein kinase RPK2 {ECO:0000313|EMBL:PKU64112.1};	--	GO:0016021,integral component of membrane; GO:0005886,plasma membrane; GO:0005524,ATP binding; GO:0004674,protein serine/threonine kinase activity; GO:0048653,anther development; GO:0048508,embryonic meristem development; GO:0009808,lignin metabolic process; GO:0009942,longitudinal axis specification; GO:0010073,meristem maintenance; GO:0009846,pollen germination; GO:0010152,pollen maturation; GO…	PF00069.25:Protein kinase domain
gene-LOC110091952	9	16	10	4	0	0	NW_021319932.1	2310767	2312032	-	LOC110091952	--	K17604 zinc finger SWIM domain-containing protein 3 | (RefSeq) LOC109756079; protein FAR1-RELATED SEQUENCE 5-like (A)	--	protein FAR1-RELATED SEQUENCE 5-like [Dendrobium catenatum]	RecName: Full=Protein FAR1-RELATED SEQUENCE 5;	SubName: Full=Protein FAR1-RELATED SEQUENCE 5 {ECO:0000313|EMBL:PKU65247.1};	--	GO:0005634,nucleus; GO:0008270,zinc ion binding; GO:0006355,regulation of transcription, DNA-templated	PF03101.15:FAR1 DNA-binding domain
gene-LOC110091953	42	81	69	69	88	43	--	--	--	--	--	--	--	--
gene-LOC110091954	27	47	60	173	143	64	NW_021319932.1	2324116	2325696	-	LOC110091954	--	--	--	BTB/POZ domain-containing protein POB1 [Dendrobium catenatum]	RecName: Full=BTB/POZ domain-containing protein At2g46260;	SubName: Full=BTB/POZ domain-containing protein POB1 {ECO:0000313|EMBL:PKU78157.1};	--	GO:0031463,Cul3-RING ubiquitin ligase complex; GO:0005634,nucleus; GO:0046982,protein heterodimerization activity; GO:0042803,protein homodimerization activity; GO:0016567,protein ubiquitination; GO:0010114,response to red light	PF00651.31:BTB/POZ domain
gene-LOC110091956	35	34	36	53	65	44	NW_021318618.1	1368350	1374340	-	LOC110091956	--	K09527 DnaJ homolog subfamily C member 7 | (RefSeq) TPR repeat-containing thioredoxin TTL1 (A)	--	TPR repeat-containing thioredoxin TTL1-like [Dendrobium catenatum]	RecName: Full=TPR repeat-containing thioredoxin TTL1; AltName: Full=Tetratricopeptide repeat thioredoxin-like 1;	SubName: Full=TPR repeat-containing thioredoxin TTL1 {ECO:0000313|EMBL:PKU85339.1};	FOG: TPR repeat	GO:0005623,cell; GO:0009738,abscisic acid-activated signaling pathway; GO:0045454,cell redox homeostasis; GO:0009789,positive regulation of abscisic acid-activated signaling pathway; GO:0009737,response to abscisic acid; GO:0006970,response to osmotic stress; GO:0009651,response to salt stress	PF07719.17:Tetratricopeptide repeat
gene-LOC110091957	200	227	230	315	404	215	NW_021318893.1	275743	301055	-	LOC110091957	--	K22455 estrogen receptor-binding fragment-associated gene 9 protein | (RefSeq) uncharacterized protein At3g61260-like (A)	--	uncharacterized protein LOC110091957 isoform X1 [Dendrobium catenatum]	RecName: Full=Remorin 4.1 {ECO:0000305}; Short=OsREM4.1 {ECO:0000303|PubMed:17984200}; AltName: Full=Remorin group 4 member 1 {ECO:0000303|PubMed:17984200};	SubName: Full=Uncharacterized protein {ECO:0000313|EMBL:PKU81398.1};	--	GO:0005886,plasma membrane; GO:0009738,abscisic acid-activated signaling pathway; GO:1900458,negative regulation of brassinosteroid mediated signaling pathway	PF03763.13:Remorin, C-terminal region
gene-LOC110091958	665	764	855	1429	1927	1827	NW_021319205.1	269469	286363	-	LOC110091958	--	K21552 methyl halide transferase [EC:2.1.1.165] | (RefSeq) probable thiol methyltransferase 2 (A)	--	probable thiol methyltransferase 2 [Dendrobium catenatum]	RecName: Full=Probable thiol methyltransferase 2; EC=2.1.1.9; AltName: Full=Protein HARMLESS TO OZONE LAYER 3; Short=AtHOL3;	SubName: Full=Putative thiol methyltransferase 2 {ECO:0000313|EMBL:PKU75855.1};	--	GO:0009507,chloroplast; GO:0009941,chloroplast envelope; GO:0018708,thiol S-methyltransferase activity	PF05724.11:Thiopurine S-methyltransferase (TPMT)
gene-LOC110091959	2826	3443	3484	2815	3548	2529	NW_021319205.1	296733	334628	-	LOC110091959	--	K06617 raffinose synthase [EC:2.4.1.82] | (RefSeq) probable galactinol--sucrose galactosyltransferase 2 (A)	ko00052: Galactose metabolism	probable galactinol--sucrose galactosyltransferase 2 [Dendrobium catenatum]	RecName: Full=Probable galactinol--sucrose galactosyltransferase 2; EC=2.4.1.82; AltName: Full=Protein SEED IMBIBITION 2; AltName: Full=Raffinose synthase 2;	SubName: Full=probable galactinol--sucrose galactosyltransferase 2 {ECO:0000313|RefSeq:XP_008794744.1};	--	GO:0009506,plasmodesma; GO:0052692,raffinose alpha-galactosidase activity; GO:0016757,transferase activity, transferring glycosyl groups; GO:0034484,raffinose catabolic process; GO:0080167,response to karrikin; GO:0006979,response to oxidative stress	PF05691.12:Raffinose synthase or seed imbibition protein Sip1
gene-LOC110091962	118	140	158	184	164	67	NW_021319205.1	343322	358295	-	LOC110091962	--	K15333 tRNA guanosine-2'-O-methyltransferase [EC:2.1.1.34] | (RefSeq) uncharacterized LOC105043884 (A)	--	subtilisin-like protease SBT5.3 [Dendrobium catenatum]	RecName: Full=Subtilisin-like protease SBT5.3; EC=3.4.21.-; AltName: Full=Auxin-induced in root cultures protein 3; AltName: Full=Subtilase subfamily 5 member 3; Short=AtSBT5.3; AltName: Full=Subtilisin-like protease AIR3; Flags: Precursor;	SubName: Full=subtilisin-like protease SBT5.3 {ECO:0000313|RefSeq:XP_017699167.1};	--	GO:0005618,cell wall; GO:0005576,extracellular region; GO:0004252,serine-type endopeptidase activity; GO:0010102,lateral root morphogenesis; GO:0009733,response to auxin	PF00082.22:Subtilase family
gene-LOC110091965	500	594	601	1058	1023	720	NW_021319205.1	362296	370224	-	LOC110091965	--	K15333 tRNA guanosine-2'-O-methyltransferase [EC:2.1.1.34] | (RefSeq) uncharacterized LOC105043884 (A)	--	subtilisin-like protease SBT5.3 isoform X1 [Dendrobium catenatum]	RecName: Full=Subtilisin-like protease SBT5.3; EC=3.4.21.-; AltName: Full=Auxin-induced in root cultures protein 3; AltName: Full=Subtilase subfamily 5 member 3; Short=AtSBT5.3; AltName: Full=Subtilisin-like protease AIR3; Flags: Precursor;	SubName: Full=subtilisin-like protease SBT5.3 {ECO:0000313|RefSeq:XP_017699167.1};	--	GO:0005618,cell wall; GO:0005576,extracellular region; GO:0004252,serine-type endopeptidase activity; GO:0010102,lateral root morphogenesis; GO:0009733,response to auxin	PF00082.22:Subtilase family
gene-LOC110091966	441	458	634	493	609	304	NW_021319205.1	207205	267650	+	LOC110091966	--	K06228 fused [EC:2.7.11.1] | (RefSeq) serine/threonine-protein kinase TIO isoform X1 (A)	--	serine/threonine-protein kinase TIO isoform X1 [Dendrobium catenatum]	RecName: Full=Serine/threonine-protein kinase TIO; EC=2.7.11.1; AltName: Full=Fused homolog; Short=AtFUSED; AltName: Full=Protein TWO-IN-ONE; Short=AtTIO;	SubName: Full=Serine/threonine-protein kinase TIO {ECO:0000313|EMBL:PKU75854.1};	--	GO:0005856,cytoskeleton; GO:0009524,phragmoplast; GO:0005524,ATP binding; GO:0019894,kinesin binding; GO:0004674,protein serine/threonine kinase activity; GO:0000911,cytokinesis by cell plate formation; GO:0009558,embryo sac cellularization; GO:0007112,male meiosis cytokinesis	PF00069.25:Protein kinase domain
gene-LOC110091967	6613	7671	7847	13713	18657	18666	NW_021319205.1	168073	188117	+	LOC110091967	--	K00975 glucose-1-phosphate adenylyltransferase [EC:2.7.7.27] | (RefSeq) glucose-1-phosphate adenylyltransferase small subunit, chloroplastic/amyloplastic isoform X1 (A)	ko00500: Starch and sucrose metabolism; ko00520: Amino sugar and nucleotide sugar metabolism	glucose-1-phosphate adenylyltransferase small subunit, chloroplastic/amyloplastic isoform X1 [Dendrobium catenatum]	RecName: Full=Glucose-1-phosphate adenylyltransferase small subunit, chloroplastic; EC=2.7.7.27; AltName: Full=ADP-glucose pyrophosphorylase; AltName: Full=ADP-glucose synthase; AltName: Full=AGPase B; AltName: Full=Alpha-D-glucose-1-phosphate adenyl transferase; Flags: Precursor;	SubName: Full=Glucose-1-phosphate adenylyltransferase small subunit, chloroplastic {ECO:0000313|EMBL:PKU75852.1};	GDP-mannose pyrophosphorylase/mannose-1-phosphate guanylyltransferase	GO:0048046,apoplast; GO:0009507,chloroplast; GO:0009570,chloroplast stroma; GO:0030931,heterotetrameric ADPG pyrophosphorylase complex; GO:0005524,ATP binding; GO:0008878,glucose-1-phosphate adenylyltransferase activity; GO:0005978,glycogen biosynthetic process; GO:0048573,photoperiodism, flowering; GO:0019252,starch biosynthetic process	PF00483.23:Nucleotidyl transferase
gene-LOC110091968	191	256	309	997	792	621	NW_021319205.1	480496	483193	+	LOC110091968	--	K10683 BRCA1-associated RING domain protein 1 | (RefSeq) protein BREAST CANCER SUSCEPTIBILITY 1 homolog isoform X1 (A)	ko03440: Homologous recombination	protein BREAST CANCER SUSCEPTIBILITY 1 homolog isoform X1 [Dendrobium catenatum]	RecName: Full=Protein BREAST CANCER SUSCEPTIBILITY 1 homolog {ECO:0000303|PubMed:12582233}; Short=AtBRCA1 {ECO:0000303|PubMed:12582233};	SubName: Full=Protein BREAST CANCER SUSCEPTIBILITY 1 like {ECO:0000313|EMBL:PKU69354.1};	Transcriptional regulator BRCA1	GO:0070531,BRCA1-A complex; GO:0031436,BRCA1-BARD1 complex; GO:0005634,nucleus; GO:0005886,plasma membrane; GO:0046872,metal ion binding; GO:0004842,ubiquitin-protein transferase activity; GO:0071480,cellular response to gamma radiation; GO:0006310,DNA recombination; GO:0006281,DNA repair; GO:0000724,double-strand break repair via homologous recombination; GO:0045717,negative regulation of fatty …	PF13771.6:PHD-like zinc-binding domain
gene-LOC110091969	95	98	114	86	61	122	NW_021318893.1	223152	230327	-	LOC110091969	--	K21604 jasmonoyl-L-amino acid hydrolase [EC:3.5.1.127] | (RefSeq) IAA-amino acid hydrolase ILR1-like 6 (A)	--	IAA-amino acid hydrolase ILR1-like 6 [Dendrobium catenatum]	RecName: Full=IAA-amino acid hydrolase ILR1-like 6; EC=3.5.1.-; Flags: Precursor;	SubName: Full=IAA-amino acid hydrolase ILR1-like 6 {ECO:0000313|EMBL:PKU81397.1};	--	GO:0016787,hydrolase activity; GO:0008152,metabolic process	PF01546.28:Peptidase family M20/M25/M40
gene-LOC110091970	465	640	448	651	791	1305	NW_021319205.1	470482	471436	+	LOC110091970	--	--	--	uncharacterized protein LOC110091970 [Dendrobium catenatum]	RecName: Full=Heavy metal-associated isoprenylated plant protein 16 {ECO:0000303|PubMed:21072340, ECO:0000303|PubMed:23368984}; Short=AtHIP16 {ECO:0000303|PubMed:21072340, ECO:0000303|PubMed:23368984}; AltName: Full=Farnesylated protein 4 {ECO:0000303|PubMed:8837031}; Short=AtFP4 {ECO:0000303|PubMed:8837031}; Flags: Precursor;	SubName: Full=Uncharacterized protein {ECO:0000313|EMBL:PKU75861.1};	--	GO:0005737,cytoplasm; GO:0046914,transition metal ion binding; GO:0046916,cellular transition metal ion homeostasis; GO:0030001,metal ion transport	--
gene-LOC110091971	0	2	5	6	2	0	NW_021319205.1	444778	452435	+	LOC110091971	--	K10398 kinesin family member 11 | (RefSeq) LOW QUALITY PROTEIN: kinesin-like protein KIN-5A (A)	--	kinesin-like protein KIN-5A [Phalaenopsis equestris]	RecName: Full=Kinesin-like protein KIN-5A {ECO:0000305};	SubName: Full=kinesin-like protein KIN-5A {ECO:0000313|RefSeq:XP_008793732.1, ECO:0000313|RefSeq:XP_008793740.1};	Kinesin-like protein	GO:0005737,cytoplasm; GO:0005871,kinesin complex; GO:0005874,microtubule; GO:0005819,spindle; GO:0005524,ATP binding; GO:0008574,ATP-dependent microtubule motor activity, plus-end-directed; GO:0008017,microtubule binding; GO:0007018,microtubule-based movement	PF00225.23:Kinesin motor domain
gene-LOC110091972	151	208	110	102	228	223	NW_021319205.1	491041	492342	-	LOC110091972	--	K13459 disease resistance protein RPS2 | (RefSeq) probable disease resistance protein At5g63020 (A)	ko04626: Plant-pathogen interaction	uncharacterized protein LOC110091972 isoform X2 [Dendrobium catenatum]	RecName: Full=Heavy metal-associated isoprenylated plant protein 47 {ECO:0000303|PubMed:21072340, ECO:0000303|PubMed:23368984}; Short=AtHIP47 {ECO:0000303|PubMed:21072340, ECO:0000303|PubMed:23368984}; Flags: Precursor;	SubName: Full=Uncharacterized protein {ECO:0000313|EMBL:PKU75861.1};	--	GO:0005737,cytoplasm; GO:0046914,transition metal ion binding; GO:0046916,cellular transition metal ion homeostasis; GO:0030001,metal ion transport	--
gene-LOC110091974	113	85	130	16	3	21	NW_021319205.1	393919	403203	-	LOC110091974	--	K15333 tRNA guanosine-2'-O-methyltransferase [EC:2.1.1.34] | (RefSeq) uncharacterized LOC105043884 (A)	--	subtilisin-like protease SBT5.3 [Dendrobium catenatum]	RecName: Full=Subtilisin-like protease SBT5.3; EC=3.4.21.-; AltName: Full=Auxin-induced in root cultures protein 3; AltName: Full=Subtilase subfamily 5 member 3; Short=AtSBT5.3; AltName: Full=Subtilisin-like protease AIR3; Flags: Precursor;	SubName: Full=Subtilisin-like protease {ECO:0000313|EMBL:PKU75858.1};	--	GO:0005618,cell wall; GO:0005576,extracellular region; GO:0004252,serine-type endopeptidase activity; GO:0010102,lateral root morphogenesis; GO:0009733,response to auxin	PF00082.22:Subtilase family
gene-LOC110091976	205	256	172	525	776	406	NW_021318756.1	368042	392337	+	LOC110091976	--	--	--	ubiquitin domain-containing protein 2-like [Dendrobium catenatum]	--	SubName: Full=Uncharacterized protein {ECO:0000313|EMBL:PKU83371.1};	Uncharacterized conserved protein	--	PF16455.5:Ubiquitin-binding domain
gene-LOC110091977	164	128	229	204	225	210	NW_021318756.1	143937	155486	-	LOC110091977	--	K02350 DNA polymerase zeta [EC:2.7.7.7] | (RefSeq) DNA polymerase zeta catalytic subunit (A)	--	uncharacterized protein LOC110091977 [Dendrobium catenatum]	--	SubName: Full=DNA polymerase zeta subunit {ECO:0000313|EMBL:PKU83363.1};	--	--	--
gene-LOC110091978	156	157	242	119	126	88	NW_021318756.1	116537	125759	-	LOC110091978	--	K03070 preprotein translocase subunit SecA | (RefSeq) protein translocase subunit SECA2, chloroplastic-like (A)	ko03060: Protein export	protein translocase subunit SECA2, chloroplastic-like [Dendrobium catenatum]	RecName: Full=Protein translocase subunit SECA2, chloroplastic; Flags: Precursor;	SubName: Full=protein translocase subunit SECA2, chloroplastic isoform X3 {ECO:0000313|RefSeq:XP_017696886.1};	--	GO:0031969,chloroplast membrane; GO:0005524,ATP binding; GO:0015462,ATPase-coupled protein transmembrane transporter activity; GO:0009658,chloroplast organization; GO:0017038,protein import; GO:0006605,protein targeting; GO:0010109,regulation of photosynthesis	PF07517.14:SecA DEAD-like domain
gene-LOC110091979	1107	1262	1299	1537	1638	1307	NW_021318893.1	158743	200306	-	LOC110091979	--	K20043 clathrin coat assembly protein AP180 | (RefSeq) putative clathrin assembly protein At5g35200 (A)	--	putative clathrin assembly protein At5g35200 isoform X1 [Dendrobium catenatum]	RecName: Full=Putative clathrin assembly protein At5g35200;	SubName: Full=Clathrin assembly protein {ECO:0000313|EMBL:PKU81395.1};	Clathrin assembly protein AP180 and related proteins, contain ENTH domain	GO:0005905,clathrin-coated pit; GO:0030136,clathrin-coated vesicle; GO:0005794,Golgi apparatus; GO:0005886,plasma membrane; GO:0005545,1-phosphatidylinositol binding; GO:0030276,clathrin binding; GO:0048268,clathrin coat assembly; GO:0006897,endocytosis	PF07651.16:ANTH domain
gene-LOC110091980	9474	7663	11713	5554	7968	3859	NW_021318756.1	58747	74139	-	LOC110091980	--	K12856 pre-mRNA-processing factor 8 | (RefSeq) pre-mRNA-processing-splicing factor 8-like (A)	ko03040: Spliceosome	hypothetical protein MA16_Dca023288 [Dendrobium catenatum]	RecName: Full=Pre-mRNA-processing-splicing factor 8A {ECO:0000305}; AltName: Full=PRP8 homolog A {ECO:0000305}; Short=AtPRP8A {ECO:0000303|PubMed:19261069}; AltName: Full=Protein ABNORMAL SUSPENSOR 2 {ECO:0000303|Ref.3}; AltName: Full=Protein EMBRYO DEFECTIVE 14 {ECO:0000303|Ref.3}; AltName: Full=Protein EMBRYO DEFECTIVE 177 {ECO:0000303|Ref.3}; AltName: Full=Protein EMBRYO DEFECTIVE 33 {ECO:0000…	SubName: Full=Uncharacterized protein {ECO:0000313|EMBL:PKU83360.1};	U5 snRNP spliceosome subunit	GO:0071013,catalytic step 2 spliceosome; GO:0009507,chloroplast; GO:0016020,membrane; GO:0005682,U5 snRNP; GO:0097157,pre-mRNA intronic binding; GO:0000386,second spliceosomal transesterification activity; GO:0030619,U1 snRNA binding; GO:0030620,U2 snRNA binding; GO:0030623,U5 snRNA binding; GO:0017070,U6 snRNA binding; GO:0000380,alternative mRNA splicing, via spliceosome; GO:0000398,mRNA splici…	PF08083.11:PROCN (NUC071) domain
gene-LOC110091981	95	105	98	105	176	71	NW_021318756.1	295856	313491	-	LOC110091981	--	K12896 splicing factor, arginine/serine-rich 7 | (RefSeq) serine/arginine-rich splicing factor RSZ23-like isoform X1 (A)	ko03040: Spliceosome	serine/arginine-rich splicing factor RSZ23-like isoform X2 [Dendrobium catenatum]	RecName: Full=Serine/arginine-rich splicing factor RSZ23; AltName: Full=RS-containing zinc finger protein 23; Short=Os-RSZ23; Short=Os-RSZp23;	SubName: Full=Serine/arginine-rich splicing factor RSZ23 {ECO:0000313|EMBL:PKA46852.1};	Alternative splicing factor SRp20/9G8 (RRM superfamily)	GO:0005634,nucleus; GO:0003676,nucleic acid binding; GO:0008270,zinc ion binding; GO:0000398,mRNA splicing, via spliceosome	PF00076.22:RNA recognition motif. (a.k.a. RRM, RBD, or RNP domain)
gene-LOC110091983	66	65	84	67	65	114	NW_021319800.1	52736	54980	+	LOC110091983	--	K18081 myotubularin-related protein 1/2 [EC:3.1.3.64 3.1.3.95] | (RefSeq) phosphatidylinositol-3-phosphatase myotubularin-2-like (A)	ko00562: Inositol phosphate metabolism; ko04070: Phosphatidylinositol signaling system	uncharacterized protein LOC110091983 [Dendrobium catenatum]	--	SubName: Full=Uncharacterized protein {ECO:0000313|EMBL:PKU67893.1};	--	--	PF05003.12:Protein of unknown function (DUF668)
gene-LOC110091984	1051	1309	1241	722	1212	745	NW_021319800.1	9501	35478	-	LOC110091984	--	K10798 poly [ADP-ribose] polymerase [EC:2.4.2.30] | (RefSeq) poly [ADP-ribose] polymerase 1 (A)	ko03410: Base excision repair	poly [ADP-ribose]	RecName: Full=Poly [ADP-ribose] polymerase 1; Short=PARP-1; EC=2.4.2.30; AltName: Full=NAD(+) ADP-ribosyltransferase 1; Short=ADPRT-1; AltName: Full=Poly[ADP-ribose] synthase 1;	SubName: Full=Poly [ADP-ribose] polymerase 1 {ECO:0000313|EMBL:PKU67892.1};	NAD+ ADP-ribosyltransferase Parp, required for poly-ADP ribosylation of nuclear proteins	GO:0005737,cytoplasm; GO:0005634,nucleus; GO:0003677,DNA binding; GO:0003910,DNA ligase (ATP) activity; GO:0051287,NAD binding; GO:0003950,NAD+ ADP-ribosyltransferase activity; GO:0008270,zinc ion binding; GO:0051103,DNA ligation involved in DNA repair; GO:0006273,lagging strand elongation; GO:0006471,protein ADP-ribosylation	PF00644.20:Poly(ADP-ribose) polymerase catalytic domain
gene-LOC110091989	156	152	125	50	81	56	NW_021319484.1	2201675	2206561	+	LOC110091989	--	--	--	uncharacterized protein B0495.5-like [Dendrobium catenatum]	--	SubName: Full=spermatogenesis-associated protein 20 {ECO:0000313|RefSeq:XP_008789958.1};	Highly conserved protein containing a thioredoxin domain	--	PF03190.15:Protein of unknown function, DUF255
gene-LOC110091994	274	344	229	341	832	1241	NW_021415396.1	145	803	+	LOC110091994	--	--	--	hypothetical protein MA16_Dca028813 [Dendrobium catenatum]	--	SubName: Full=Uncharacterized protein {ECO:0000313|EMBL:PKU61543.1};	--	--	PF12023.8:Domain of unknown function (DUF3511)
gene-LOC110091995	81	94	104	36	58	58	NW_021593149.1	2123	3797	+	LOC110091995	--	--	--	uncharacterized protein LOC110091995 [Dendrobium catenatum]	--	SubName: Full=uncharacterized protein LOC103714522 {ECO:0000313|RefSeq:XP_008800023.1};	Uncharacterized conserved protein	--	PF10218.9:Uncharacterized conserved protein (DUF2054)
gene-LOC110091996	2	0	3	0	0	0	NW_021415742.1	310	1302	-	LOC110091996	--	K13422 transcription factor MYC2 | (RefSeq) uncharacterized protein LOC112027257 (A)	ko04016: MAPK signaling pathway - plant; ko04075: Plant hormone signal transduction	uncharacterized protein LOC110091996 [Dendrobium catenatum]	--	SubName: Full=RNA-directed DNA polymerase {ECO:0000313|EMBL:PKU71252.1};	FOG: Transposon-encoded proteins with TYA, reverse transcriptase, integrase domains in various combinations	--	PF00098.23:Zinc knuckle
gene-LOC110091998	41	48	73	136	118	41	NW_021318893.1	471841	472395	-	LOC110091998	--	--	--	--	--	--	--	--	--
gene-LOC110092000	2	2	1	3	5	1	NW_021319221.1	10426	13058	-	LOC110092000	--	K15382 solute carrier family 50 (sugar transporter) | (RefSeq) bidirectional sugar transporter SWEET14-like (A)	--	Bidirectional sugar transporter SWEET15 [Dendrobium catenatum]	RecName: Full=Bidirectional sugar transporter SWEET15; Short=OsSWEET15;	SubName: Full=Bidirectional sugar transporter SWEET15 {ECO:0000313|EMBL:PKU75689.1};	Multitransmembrane protein	GO:0016021,integral component of membrane; GO:0005887,integral component of plasma membrane; GO:0051119,sugar transmembrane transporter activity; GO:0008643,carbohydrate transport	PF03083.16:Sugar efflux transporter for intercellular exchange
gene-LOC110092001	85	63	127	109	149	70	NW_021593279.1	7282	9275	+	LOC110092001	--	K03327 multidrug resistance protein, MATE family | (RefSeq) protein DETOXIFICATION 19-like (A)	--	protein DETOXIFICATION 19-like [Dendrobium catenatum]	RecName: Full=Protein DETOXIFICATION 19 {ECO:0000303|PubMed:11739388}; Short=AtDTX19 {ECO:0000303|PubMed:11739388}; AltName: Full=Multidrug and toxic compound extrusion protein 19 {ECO:0000305}; Short=MATE protein 19 {ECO:0000305}; AltName: Full=Protein ABERRANT LATERAL ROOT FORMATION 5 {ECO:0000303|PubMed:11449055};	SubName: Full=MATE efflux family protein ALF5 {ECO:0000313|EMBL:PKU59141.1};	Uncharacterized membrane protein, predicted efflux pump	GO:0016021,integral component of membrane; GO:0015297,antiporter activity; GO:0015238,drug transmembrane transporter activity; GO:0006855,drug transmembrane transport; GO:0009636,response to toxic substance	PF01554.18:MatE
gene-LOC110092002	322	314	475	395	525	392	NW_021319520.1	297029	368543	-	LOC110092002	--	K12590 exosome complex component RRP46 | (RefSeq) exosome complex exonuclease RRP46 homolog isoform X1 (A)	ko03018: RNA degradation	exosome complex exonuclease RRP46 homolog isoform X1 [Dendrobium catenatum]	RecName: Full=Exosome complex exonuclease RRP46 homolog {ECO:0000305}; EC=3.1.13.- {ECO:0000305}; AltName: Full=Exosome component 5 {ECO:0000305}; AltName: Full=Ribosomal RNA-processing protein 46 {ECO:0000305};	SubName: Full=Exosome complex exonuclease RRP46 like {ECO:0000313|EMBL:PKU71343.1};	Exosomal 3'-5' exoribonuclease complex, subunit Rrp46	GO:0000177,cytoplasmic exosome (RNase complex); GO:0000176,nuclear exosome (RNase complex); GO:0005730,nucleolus; GO:0005840,ribosome; GO:0004536,deoxyribonuclease activity; GO:0003690,double-stranded DNA binding; GO:0004527,exonuclease activity; GO:0042802,identical protein binding; GO:0004540,ribonuclease activity; GO:0003727,single-stranded RNA binding; GO:0071028,nuclear mRNA surveillance; GO…	PF01138.21:3' exoribonuclease family, domain 1
gene-LOC110092003	153	151	264	218	306	137	NW_021319520.1	444926	476980	-	LOC110092003	--	K17964 leucine-rich PPR motif-containing protein, mitochondrial | (RefSeq) pentatricopeptide repeat-containing protein At1g62910 (A)	--	pentatricopeptide repeat-containing protein At4g19440, chloroplastic-like isoform X1 [Dendrobium catenatum]	RecName: Full=Pentatricopeptide repeat-containing protein At4g19440, chloroplastic; Flags: Precursor;	SubName: Full=Pentatricopeptide repeat-containing protein {ECO:0000313|EMBL:PKU71344.1};	FOG: PPR repeat	GO:0009507,chloroplast; GO:0043231,intracellular membrane-bounded organelle; GO:0004519,endonuclease activity; GO:0003723,RNA binding; GO:0009451,RNA modification	PF13041.6:PPR repeat family
gene-LOC110092004	2	5	0	0	4	0	--	--	--	--	--	--	--	--
gene-LOC110092005	56	39	61	14	36	7	NW_021319520.1	580619	666685	-	LOC110092005	--	K14685 solute carrier family 40 (iron-regulated transporter), member 1 | (RefSeq) solute carrier family 40 member 1 isoform X1 (A)	--	solute carrier family 40 member 1 isoform X1 [Dendrobium catenatum]	RecName: Full=Solute carrier family 40 member 1;	SubName: Full=Solute carrier family 40 member 1 {ECO:0000313|EMBL:PKU71347.1};	Iron transporter	GO:0016021,integral component of membrane; GO:0005381,iron ion transmembrane transporter activity	PF06963.12:Ferroportin1 (FPN1)
gene-LOC110092006	2681	3783	2515	1613	3017	4557	NW_021531307.1	170820	171671	+	LOC110092006	--	K22547 arsenate reductase [EC:1.20.4.1] | (RefSeq) rhodanese-like domain-containing protein 19, mitochondrial (A)	--	rhodanese-like domain-containing protein 10 [Dendrobium catenatum]	RecName: Full=Rhodanese-like domain-containing protein 10; AltName: Full=Sulfurtransferase 10; Short=AtStr10;	SubName: Full=NF-X1-type zinc finger protein NFXL2 {ECO:0000313|EMBL:PKU60003.1};	--	GO:0009507,chloroplast; GO:0009941,chloroplast envelope; GO:0009534,chloroplast thylakoid; GO:0016021,integral component of membrane; GO:0009409,response to cold	PF00581.20:Rhodanese-like domain
gene-LOC110092007	1	0	0	2	0	17	NW_021385521.1	594	994	+	LOC110092007	--	K16292 KDEL-tailed cysteine endopeptidase [EC:3.4.22.-] | (RefSeq) thiol protease SEN102-like (A)	--	thiol protease SEN102-like, partial [Dendrobium catenatum]	RecName: Full=Thiol protease SEN102; EC=3.4.22.-; Flags: Precursor;	SubName: Full=Thiol protease SEN102 {ECO:0000313|EMBL:PKU60871.1};	Cysteine proteinase Cathepsin L	GO:0005788,endoplasmic reticulum lumen; GO:0008234,cysteine-type peptidase activity	PF00112.23:Papain family cysteine protease
gene-LOC110092008	2	5	3	30	48	37	NW_021487159.1	1	1818	+	LOC110092008	--	--	--	--	--	--	--	--	--
gene-LOC110092009	419	492	456	467	850	586	NW_021483622.1	54	999	+	LOC110092009	--	--	--	--	--	--	--	--	--
gene-LOC110092013	211	263	302	146	182	130	NW_021414854.1	4	994	+	LOC110092013	--	K14493 gibberellin receptor GID1 [EC:3.-.-.-] | (RefSeq) gibberellin receptor GID1B-like (A)	ko04075: Plant hormone signal transduction	probable carboxylesterase 17, partial [Dendrobium catenatum]	RecName: Full=Probable carboxylesterase 17; AltName: Full=AtCXE17; EC=3.1.1.1;	SubName: Full=Putative carboxylesterase 17 {ECO:0000313|EMBL:PKU61620.1};	Arylacetamide deacetylase	GO:0052689,carboxylic ester hydrolase activity; GO:0016787,hydrolase activity; GO:0009056,catabolic process	PF07859.13:alpha/beta hydrolase fold
gene-LOC110092014	32	31	53	78	45	84	NW_021374334.1	175	2539	-	LOC110092014	--	K15692 E3 ubiquitin-protein ligase RNF13 [EC:2.3.2.27] | (RefSeq) uncharacterized protein LOC110092014 (A)	--	E3 ubiquitin-protein ligase ATL31 [Dendrobium catenatum]	RecName: Full=Receptor homology region, transmembrane domain- and RING domain-containing protein 1; Short=AtRMR1; AltName: Full=ReMembR-H2 protein JR700; Flags: Precursor;	SubName: Full=E3 ubiquitin-protein ligase ATL31 {ECO:0000313|EMBL:PKU62294.1};	Predicted E3 ubiquitin ligase	GO:0005783,endoplasmic reticulum; GO:0000306,extrinsic component of vacuolar membrane; GO:0000139,Golgi membrane; GO:0016021,integral component of membrane; GO:0031902,late endosome membrane; GO:0032586,protein storage vacuole membrane; GO:0046872,metal ion binding; GO:0043621,protein self-association; GO:0006886,intracellular protein transport	PF17123.5:RING-like zinc finger
gene-LOC110092015	8	6	13	0	0	5	NW_021356117.1	156	1220	+	LOC110092015	--	--	--	uncharacterized protein LOC110092015 [Dendrobium catenatum]	--	SubName: Full=Geranylgeranyl transferase type-2 subunit beta {ECO:0000313|EMBL:PKU86213.1};	--	--	--
gene-LOC110092017	0	1	5	0	0	0	--	--	--	--	--	--	--	--
gene-LOC110092018	90	102	122	48	55	115	NW_021426135.1	158	1672	+	LOC110092018	--	K02493 release factor glutamine methyltransferase [EC:2.1.1.297] | (RefSeq) uncharacterized protein LOC110092018 (A)	--	release factor glutamine methyltransferase [Dendrobium catenatum]	--	SubName: Full=Release factor glutamine methyltransferase {ECO:0000313|EMBL:PKU61381.1};	Predicted methyltransferase	--	PF06325.13:Ribosomal protein L11 methyltransferase (PrmA)
gene-LOC110092019	625	984	662	581	853	2833	NW_021583797.1	214	995	+	LOC110092019	--	--	--	uncharacterized protein LOC110092019 [Dendrobium catenatum]	--	SubName: Full=Uncharacterized protein {ECO:0000313|EMBL:PKU80039.1};	U4/U6-associated splicing factor PRP4	--	--
gene-LOC110092022	343	465	482	81	107	70	--	--	--	--	--	--	--	--
gene-LOC110092025	0	1	0	6	4	0	NW_021318505.1	1476167	1476640	+	LOC110092025	--	K12882 nuclear cap-binding protein subunit 1 | (RefSeq) nuclear cap-binding protein subunit 1-like (A)	ko03013: RNA transport; ko03015: mRNA surveillance pathway; ko03040: Spliceosome	uncharacterized protein LOC110092025 [Dendrobium catenatum]	RecName: Full=Uncharacterized mitochondrial protein AtMg00810; AltName: Full=ORF240b;	SubName: Full=Retrovirus-related Pol polyprotein from transposon TNT 1-94 {ECO:0000313|EMBL:PKU85270.1};	FOG: Transposon-encoded proteins with TYA, reverse transcriptase, integrase domains in various combinations	GO:0005739,mitochondrion	--
gene-LOC110092026	0	3	5	41	7	12	NW_021318505.1	1470754	1473830	-	LOC110092026	--	K01593 aromatic-L-amino-acid/L-tryptophan decarboxylase [EC:4.1.1.28 4.1.1.105] | (RefSeq) tyrosine/DOPA decarboxylase (A)	ko00350: Tyrosine metabolism; ko00360: Phenylalanine metabolism; ko00380: Tryptophan metabolism; ko00901: Indole alkaloid biosynthesis; ko00950: Isoquinoline alkaloid biosynthesis; ko00965: Betalain biosynthesis	uncharacterized protein LOC110092026 [Dendrobium catenatum]	--	SubName: Full=Uncharacterized protein {ECO:0000313|EMBL:PKU60163.1};	--	--	PF05056.12:Protein of unknown function (DUF674)
gene-LOC110092030	3174	2341	4090	2473	3127	1922	NW_021318505.1	1336714	1420292	+	LOC110092030	--	K19525 vacuolar protein sorting-associated protein 13A/C | (RefSeq) uncharacterized protein LOC110092030 isoform X1 (A)	--	uncharacterized protein LOC110092030 isoform X1 [Dendrobium catenatum]	--	SubName: Full=LOW QUALITY PROTEIN: uncharacterized protein LOC103710761 {ECO:0000313|RefSeq:XP_017699200.1};	Vacuolar protein sorting-associated protein	--	PF06101.11:Vacuolar protein sorting-associated protein 62
gene-LOC110092032	708	857	955	634	550	432	NW_021318505.1	1420953	1434226	-	LOC110092032	--	K01593 aromatic-L-amino-acid/L-tryptophan decarboxylase [EC:4.1.1.28 4.1.1.105] | (RefSeq) tyrosine/DOPA decarboxylase (A)	ko00350: Tyrosine metabolism; ko00360: Phenylalanine metabolism; ko00380: Tryptophan metabolism; ko00901: Indole alkaloid biosynthesis; ko00950: Isoquinoline alkaloid biosynthesis; ko00965: Betalain biosynthesis	uncharacterized protein LOC110092024 isoform X1 [Dendrobium catenatum]	--	SubName: Full=Uncharacterized protein {ECO:0000313|EMBL:PKU87623.1};	--	--	PF05056.12:Protein of unknown function (DUF674)
gene-LOC110092033	105	94	155	228	211	68	NW_021541844.1	1	801	+	LOC110092033	--	--	--	--	--	--	--	--	--
gene-LOC110092034	69	51	80	41	48	46	NW_021318783.1	654	3220	-	LOC110092034	--	--	--	--	--	--	--	--	--
gene-LOC110092035	1032	883	1262	1103	1480	835	NW_021319503.1	8165	9794	-	LOC110092035	--	K02989 small subunit ribosomal protein S5e | (RefSeq) 40S ribosomal protein S5-like (A)	ko03010: Ribosome	40S ribosomal protein S5-like [Dendrobium catenatum]	RecName: Full=40S ribosomal protein S5; Flags: Fragment;	SubName: Full=40S ribosomal protein S5 {ECO:0000313|EMBL:PKU71744.1};	Ribosomal protein S7	GO:0015935,small ribosomal subunit; GO:0003723,RNA binding; GO:0003735,structural constituent of ribosome; GO:0006412,translation	PF00177.21:Ribosomal protein S7p/S5e
gene-LOC110092036	0	0	4	33	9	12	NW_021359578.1	165	1038	+	LOC110092036	--	K20617 cytochrome P450 family 71 subfamily A | (RefSeq) cytochrome P450 71A1-like (A)	--	cytochrome P450 71A1-like, partial [Dendrobium catenatum]	RecName: Full=Cytochrome P450 71A1; EC=1.14.-.-; AltName: Full=ARP-2; AltName: Full=CYPLXXIA1;	SubName: Full=Cytochrome P450 71A1 {ECO:0000313|EMBL:PKU73910.1};	Cytochrome P450 CYP2 subfamily	GO:0005789,endoplasmic reticulum membrane; GO:0016021,integral component of membrane; GO:0031090,organelle membrane; GO:0020037,heme binding; GO:0005506,iron ion binding; GO:0004497,monooxygenase activity; GO:0016705,oxidoreductase activity, acting on paired donors, with incorporation or reduction of molecular oxygen; GO:0009835,fruit ripening	PF00067.22:Cytochrome P450
gene-LOC110092037	0	1	0	6	0	0	NW_021320156.1	53606	69364	-	LOC110092037	--	K12309 beta-galactosidase [EC:3.2.1.23] | (RefSeq) beta-galactosidase 2 (A)	ko00052: Galactose metabolism; ko00511: Other glycan degradation; ko00531: Glycosaminoglycan degradation; ko00600: Sphingolipid metabolism; ko00604: Glycosphingolipid biosynthesis - ganglio series	beta-galactosidase 7-like isoform X1 [Dendrobium catenatum]	RecName: Full=Beta-galactosidase 16; Short=Lactase 16; EC=3.2.1.23; Flags: Precursor;	SubName: Full=Beta-galactosidase 16 {ECO:0000313|EMBL:PKU63146.1};	Beta-galactosidase	GO:0048046,apoplast; GO:0005618,cell wall; GO:0005773,vacuole; GO:0004565,beta-galactosidase activity; GO:0030246,carbohydrate binding; GO:0005975,carbohydrate metabolic process	PF01301.19:Glycosyl hydrolases family 35
gene-LOC110092038	1843	1723	1882	2381	3139	3019	NW_021318710.1	2147	4074	+	LOC110092038	--	K00121 S-(hydroxymethyl)glutathione dehydrogenase / alcohol dehydrogenase [EC:1.1.1.284 1.1.1.1] | (RefSeq) alcohol dehydrogenase class-3 (A)	ko00010: Glycolysis / Gluconeogenesis; ko00071: Fatty acid degradation; ko00350: Tyrosine metabolism; ko01200: Carbon metabolism	alcohol dehydrogenase class-3 [Phalaenopsis equestris]	RecName: Full=Alcohol dehydrogenase class-3; EC=1.1.1.1 {ECO:0000269|PubMed:8643621}; AltName: Full=Alcohol dehydrogenase class-III; AltName: Full=Glutathione-dependent formaldehyde dehydrogenase; Short=FALDH; Short=FDH; Short=GSH-FDH; EC=1.1.1.-; AltName: Full=S-(hydroxymethyl)glutathione dehydrogenase; EC=1.1.1.284 {ECO:0000269|PubMed:8643621};	SubName: Full=alcohol dehydrogenase class-3-like {ECO:0000313|RefSeq:XP_008779629.2};	Alcohol dehydrogenase, class III	GO:0005737,cytoplasm; GO:0004022,alcohol dehydrogenase (NAD) activity; GO:0051903,S-(hydroxymethyl)glutathione dehydrogenase activity; GO:0008270,zinc ion binding; GO:0006069,ethanol oxidation	PF00107.26:Zinc-binding dehydrogenase
gene-LOC110092039	308	395	342	194	452	190	NW_021318710.1	37070	40111	-	LOC110092039	--	--	--	uncharacterized protein LOC110092039 [Dendrobium catenatum]	--	SubName: Full=Uncharacterized protein {ECO:0000313|EMBL:PKU84010.1};	--	--	--
gene-LOC110092040	1213	1336	1421	1514	2180	2159	NW_021531307.1	7249	47100	+	LOC110092040	--	K05857 phosphatidylinositol phospholipase C, delta [EC:3.1.4.11] | (RefSeq) phosphoinositide phospholipase C 2-like (A)	ko00562: Inositol phosphate metabolism; ko04070: Phosphatidylinositol signaling system	phosphoinositide phospholipase C 2-like [Dendrobium catenatum]	RecName: Full=Phosphoinositide phospholipase C 4; EC=3.1.4.11; AltName: Full=Phosphoinositide phospholipase PLC4; Short=AtPLC4; Short=PI-PLC4;	SubName: Full=Phosphoinositide phospholipase C 6 {ECO:0000313|EMBL:PKU60001.1};	Phosphoinositide-specific phospholipase C	GO:0005829,cytosol; GO:0005886,plasma membrane; GO:0004435,phosphatidylinositol phospholipase C activity; GO:0004871,NA; GO:0035556,intracellular signal transduction; GO:0016042,lipid catabolic process	PF00388.19:Phosphatidylinositol-specific phospholipase C, X domain
gene-LOC110092041	257	246	274	299	473	527	NW_021318710.1	48052	56718	+	LOC110092041	--	K13412 calcium-dependent protein kinase [EC:2.7.11.1] | (RefSeq) calcium-dependent protein kinase 26-like (A)	ko04626: Plant-pathogen interaction	calcium-dependent protein kinase 26-like [Dendrobium catenatum]	RecName: Full=Calcium-dependent protein kinase 4; Short=CDPK 4; Short=StCDPK4; EC=2.7.11.1;	SubName: Full=Calcium-dependent protein kinase 4 {ECO:0000313|EMBL:PKU84011.1};	Ca2+/calmodulin-dependent protein kinase, EF-Hand protein superfamily	GO:0016020,membrane; GO:0005524,ATP binding; GO:0005509,calcium ion binding; GO:0004674,protein serine/threonine kinase activity	PF00069.25:Protein kinase domain
gene-LOC110092042	0	1	0	0	0	0	NW_021318710.1	26614	27479	+	LOC110092042	--	K09422 transcription factor MYB, plant | (RefSeq) myb-related protein 305-like (A)	--	myb-related protein 305-like [Dendrobium catenatum]	RecName: Full=Transcription factor MYB62 {ECO:0000303|PubMed:9839469}; AltName: Full=Myb-related protein 62 {ECO:0000303|PubMed:9839469}; Short=AtMYB62 {ECO:0000303|PubMed:9839469};	SubName: Full=Myb-related protein 305 {ECO:0000313|EMBL:PKU84009.1};	Transcription factor, Myb superfamily	GO:0005634,nucleus; GO:0003700,DNA-binding transcription factor activity; GO:0000981,DNA-binding transcription factor activity, RNA polymerase II-specific; GO:0043565,sequence-specific DNA binding; GO:0001135,RNA polymerase II transcription regulator recruiting activity; GO:0044212,transcription regulatory region DNA binding; GO:0030154,cell differentiation; GO:0016036,cellular response to phosph…	PF00249.31:Myb-like DNA-binding domain
gene-LOC110092043	1129	1747	1203	1610	2207	2574	NW_021318710.1	14888	20201	+	LOC110092043	--	K02889 large subunit ribosomal protein L21e | (RefSeq) 60S ribosomal protein L21-1 (A)	ko03010: Ribosome	60S ribosomal protein L21-1 [Dendrobium catenatum]	RecName: Full=60S ribosomal protein L21-1;	SubName: Full=60S ribosomal protein L21-1 {ECO:0000313|EMBL:PKU84008.1};	60S ribosomal protein L21	GO:0009507,chloroplast; GO:0022625,cytosolic large ribosomal subunit; GO:0022626,cytosolic ribosome; GO:0005730,nucleolus; GO:0003735,structural constituent of ribosome; GO:0006412,translation	PF01157.18:Ribosomal protein L21e
gene-LOC110092044	29	57	61	71	152	148	NW_021319573.1	45314	48091	+	LOC110092044	--	--	--	--	--	--	--	--	--
gene-LOC110092046	12	15	20	7	28	0	NW_021319455.1	1423261	1428629	+	LOC110092046	--	K07877 Ras-related protein Rab-2A | (RefSeq) ras-related protein RABB1c-like (A)	--	Ras-related protein RABB1c [Apostasia shenzhenica]	RecName: Full=Ras-related protein RABB1c; Short=AtRABB1c; AltName: Full=Ras-related protein Rab2A; Short=AtRab2A;	SubName: Full=Ras-related protein RABB1c {ECO:0000313|EMBL:PKA53807.1};	GTPase Rab2, small G protein superfamily	GO:0005768,endosome; GO:0016020,membrane; GO:0005886,plasma membrane; GO:0005773,vacuole; GO:0005525,GTP binding; GO:0003924,GTPase activity; GO:0006888,ER to Golgi vesicle-mediated transport; GO:0015031,protein transport; GO:0030100,regulation of endocytosis	PF00071.22:Ras family
gene-LOC110092047	595	558	702	532	712	411	NW_021531307.1	96493	170269	+	LOC110092047	--	K15683 NF-X1-type zinc finger protein NFXL1 | (RefSeq) NF-X1-type zinc finger protein NFXL2 (A)	--	NF-X1-type zinc finger protein NFXL2 [Dendrobium catenatum]	RecName: Full=NF-X1-type zinc finger protein NFXL2; Short=AtNFXL2; EC=2.3.2.-; AltName: Full=Protein EARLY BIRD;	SubName: Full=NF-X1-type zinc finger protein NFXL2 {ECO:0000313|EMBL:PKA62682.1};	Transcription factor NF-X1, contains NFX-type Zn2+-binding and R3H domains	GO:0016021,integral component of membrane; GO:0005634,nucleus; GO:0016874,ligase activity; GO:0000977,RNA polymerase II regulatory region sequence-specific DNA binding; GO:0001078,proximal promoter DNA-binding transcription repressor activity, RNA polymerase II-specific; GO:0008270,zinc ion binding; GO:0016567,protein ubiquitination; GO:0010310,regulation of hydrogen peroxide metabolic process; G…	PF01422.17:NF-X1 type zinc finger
gene-LOC110092050	724	580	757	643	861	488	NW_021319455.1	1510344	1512966	+	LOC110092050	--	K09419 heat shock transcription factor, other eukaryote | (RefSeq) heat stress transcription factor A-4b-like (A)	--	heat stress transcription factor A-4b-like [Dendrobium catenatum]	RecName: Full=Heat stress transcription factor A-4b; AltName: Full=Heat stress transcription factor 4; Short=OsHsf-04; AltName: Full=Heat stress transcription factor 9; Short=rHsf9;	SubName: Full=Heat stress transcription factor A-4b {ECO:0000313|EMBL:PKU72647.1};	Heat shock transcription factor	GO:0005737,cytoplasm; GO:0005634,nucleus; GO:0003700,DNA-binding transcription factor activity; GO:0043565,sequence-specific DNA binding; GO:0006351,transcription, DNA-templated	PF00447.17:HSF-type DNA-binding
gene-LOC110092051	5	11	9	13	11	18	NW_021319455.1	1460261	1466751	-	LOC110092051	--	K14503 brassinosteroid resistant 1/2 | (RefSeq) BES1/BZR1 homolog protein 2 (A)	ko04075: Plant hormone signal transduction	protein BZR1 homolog 2-like [Dendrobium catenatum]	RecName: Full=Protein BZR1 homolog 2; Short=OsBZR2; AltName: Full=Protein BRASSINAZOLE-RESISTANT 1 homolog 2;	SubName: Full=BES1/BZR1 like protein 4 {ECO:0000313|EMBL:PKU72646.1};	--	GO:0003677,DNA binding; GO:0003700,DNA-binding transcription factor activity; GO:0009742,brassinosteroid mediated signaling pathway; GO:0040008,regulation of growth; GO:0006351,transcription, DNA-templated	PF05687.13:BES1/BZR1 plant transcription factor, N-terminal
gene-LOC110092052	448	387	504	345	510	244	NW_021319455.1	1546060	1565594	+	LOC110092052	--	K03549 KUP system potassium uptake protein | (RefSeq) potassium transporter 8-like isoform X1 (A)	--	uncharacterized protein LOC110092052 [Dendrobium catenatum]	RecName: Full=Protein SUPPRESSOR OF QUENCHING 1, chloroplastic {ECO:0000303|PubMed:23818601}; EC=3.1.3.- {ECO:0000250|UniProtKB:P95649}; Flags: Precursor;	SubName: Full=Uncharacterized protein {ECO:0000313|EMBL:PKA64462.1};	--	GO:0009507,chloroplast; GO:0009570,chloroplast stroma; GO:0009534,chloroplast thylakoid; GO:0009535,chloroplast thylakoid membrane; GO:0016021,integral component of membrane; GO:0042651,thylakoid membrane; GO:0016787,hydrolase activity; GO:0046872,metal ion binding; GO:0045454,cell redox homeostasis; GO:0008152,metabolic process; GO:0010196,nonphotochemical quenching	PF01436.21:NHL repeat
gene-LOC110092053	1367	2240	1827	4182	4214	5340	NW_021319455.1	1430556	1435998	-	LOC110092053	--	--	--	transcription elongation factor 1 homolog [Dendrobium catenatum]	RecName: Full=Transcription elongation factor 1 homolog;	RecName: Full=Transcription elongation factor 1 homolog {ECO:0000256|RuleBase:RU364033};	Uncharacterized Zn ribbon-containing protein	GO:0008023,transcription elongation factor complex; GO:0046872,metal ion binding; GO:0000993,RNA polymerase II complex binding; GO:0048096,chromatin-mediated maintenance of transcription; GO:0006368,transcription elongation from RNA polymerase II promoter	PF05129.13:Transcription elongation factor Elf1 like
gene-LOC110092054	1695	1533	1926	1407	2065	1296	NW_021319455.1	1397125	1399455	+	LOC110092054	--	--	--	protein PLASTID MOVEMENT IMPAIRED 2 [Dendrobium catenatum]	RecName: Full=Protein PLASTID MOVEMENT IMPAIRED 2; AltName: Full=Protein WEAK CHLOROPLAST MOVEMENT UNDER BLUE LIGHT 2; Short=Protein WEB2;	SubName: Full=Protein PLASTID MOVEMENT IMPAIRED 2 {ECO:0000313|EMBL:PKU72642.1};	--	GO:0005829,cytosol; GO:0009904,chloroplast accumulation movement; GO:0009903,chloroplast avoidance movement; GO:0009637,response to blue light	PF05701.11:Weak chloroplast movement under blue light
gene-LOC110092055	378	308	401	368	442	287	NW_021319455.1	1441706	1446539	-	LOC110092055	--	K13993 HSP20 family protein | (RefSeq) heat shock protein (A)	ko04141: Protein processing in endoplasmic reticulum	uncharacterized protein LOC110092055 isoform X1 [Dendrobium catenatum]	RecName: Full=17.8 kDa class I heat shock protein; AltName: Full=17.8 kDa heat shock protein; Short=AtHsp17.8;	SubName: Full=17.8 kDa class I heat shock protein {ECO:0000313|EMBL:PKU72645.1};	Molecular chaperone (small heat-shock protein Hsp26/Hsp42)	GO:0005737,cytoplasm; GO:0043621,protein self-association; GO:0009408,response to heat; GO:0006979,response to oxidative stress	PF00011.21:Hsp20/alpha crystallin family
gene-LOC110092056	1178	907	1494	890	1058	387	NW_021531307.1	382100	509979	+	LOC110092056	--	K06100 symplekin | (RefSeq) uncharacterized protein LOC110092056 isoform X1 (A)	ko03015: mRNA surveillance pathway	uncharacterized protein LOC110092056 isoform X1 [Dendrobium catenatum]	--	SubName: Full=Uncharacterized protein {ECO:0000313|EMBL:PKU60004.1};	mRNA cleavage and polyadenylation factor II complex, subunit PTA1	--	PF12295.8:Symplekin tight junction protein C terminal
gene-LOC110092057	1057	1010	1409	1281	1344	988	NW_021320183.1	19937	120558	-	LOC110092057	--	K14408 cleavage stimulation factor subunit 3 | (RefSeq) cleavage stimulation factor subunit 77-like isoform X1 (A)	ko03015: mRNA surveillance pathway	cleavage stimulation factor subunit 77-like isoform X1 [Dendrobium catenatum]	RecName: Full=Cleavage stimulation factor subunit 77 {ECO:0000303|PubMed:12379796}; Short=AtCstF-77 {ECO:0000303|PubMed:12379796}; Short=AtCstF77 {ECO:0000303|PubMed:16282318}; AltName: Full=CF-1 77 kDa subunit {ECO:0000305}; AltName: Full=Cleavage stimulation factor 77 kDa subunit {ECO:0000305}; Short=CSTF 77 kDa subunit {ECO:0000305}; AltName: Full=Protein SUPPRESSORS OF OVEREXPRESSED FCA 2 {EC…	SubName: Full=Uncharacterized protein {ECO:0000313|EMBL:PKA61851.1};	mRNA cleavage and polyadenylation factor I complex, subunit RNA14	GO:0005634,nucleus; GO:0003729,mRNA binding; GO:0042868,antisense RNA metabolic process; GO:0031047,gene silencing by RNA; GO:0006379,mRNA cleavage; GO:0006397,mRNA processing; GO:0045892,negative regulation of transcription, DNA-templated; GO:0060968,regulation of gene silencing; GO:0031123,RNA 3'-end processing	PF05843.14:Suppressor of forked protein (Suf)
gene-LOC110092058	83	115	101	129	118	149	NW_021320183.1	15505	19176	+	LOC110092058	--	K00942 guanylate kinase [EC:2.7.4.8] | (RefSeq) guanylate kinase 2, chloroplastic/mitochondrial isoform X1 (A)	ko00230: Purine metabolism	guanylate kinase 2, chloroplastic/mitochondrial isoform X1 [Dendrobium catenatum]	RecName: Full=Guanylate kinase 2, chloroplastic/mitochondrial; Short=OsGKpm; EC=2.7.4.8; AltName: Full=GMP kinase 2; AltName: Full=Protein VIRESCENT 2; Flags: Precursor;	SubName: Full=Guanylate kinase {ECO:0000313|EMBL:PKU63008.1};	Guanylate kinase	GO:0009507,chloroplast; GO:0005829,cytosol; GO:0005739,mitochondrion; GO:0005524,ATP binding; GO:0004385,guanylate kinase activity	PF00625.21:Guanylate kinase
gene-LOC110092059	99	89	150	137	108	65	NW_021320183.1	9234	14680	+	LOC110092059	--	K20718 LRR receptor-like serine/threonine-protein kinase ERECTA [EC:2.7.11.1] | (RefSeq) LRR receptor-like serine/threonine-protein kinase ERECTA (A)	ko04016: MAPK signaling pathway - plant	probable inactive receptor kinase At5g10020 [Dendrobium catenatum]	RecName: Full=Probable inactive receptor kinase At5g10020; Flags: Precursor;	SubName: Full=Putative inactive receptor kinase {ECO:0000313|EMBL:PKU63007.1};	--	GO:0005829,cytosol; GO:0016021,integral component of membrane; GO:0005886,plasma membrane; GO:0005524,ATP binding; GO:0004672,protein kinase activity	PF07714.17:Protein tyrosine kinase
gene-LOC110092062	3	11	10	1	0	0	NW_021319010.1	53711	54868	+	LOC110092062	--	K01528 dynamin GTPase [EC:3.6.5.5] | (Kazusa) Lj0g3v0199559.2; - (A)	ko04144: Endocytosis	uncharacterized protein LOC110092062 [Dendrobium catenatum]	RecName: Full=Retrovirus-related Pol polyprotein from transposon RE1; AltName: Full=Retro element 1 {ECO:0000303|PubMed:10689195}; Short=AtRE1 {ECO:0000303|PubMed:10689195}; Includes: RecName: Full=Protease RE1; EC=3.4.23.-; Includes: RecName: Full=Reverse transcriptase RE1; EC=2.7.7.49; Includes: RecName: Full=Endonuclease RE1;	SubName: Full=Retrovirus-related Pol polyprotein from transposon TNT 1-94 {ECO:0000313|EMBL:PKU64446.1};	FOG: Transposon-encoded proteins with TYA, reverse transcriptase, integrase domains in various combinations	GO:0004190,aspartic-type endopeptidase activity; GO:0004519,endonuclease activity; GO:0046872,metal ion binding; GO:0003676,nucleic acid binding; GO:0003964,RNA-directed DNA polymerase activity; GO:0015074,DNA integration; GO:0006310,DNA recombination	PF07727.14:Reverse transcriptase (RNA-dependent DNA polymerase)
gene-LOC110092063	1267	1418	1432	1414	1722	2283	NW_021319010.1	38475	46247	-	LOC110092063	--	--	--	protein TsetseEP-like [Dendrobium catenatum]	--	SubName: Full=Uncharacterized protein {ECO:0000313|EMBL:PKU80141.1};	--	--	PF05887.11:Procyclic acidic repetitive protein (PARP)
gene-LOC110092065	4	1	5	29	42	26	NW_021319010.1	13528	15264	-	LOC110092065	--	--	--	hypothetical protein MA16_Dca026533 [Dendrobium catenatum]	RecName: Full=Transcription factor HHO2 {ECO:0000305}; AltName: Full=MYB-domain transcription factor HHO2 {ECO:0000305}; AltName: Full=Protein HRS1 HOMOLOG 2 {ECO:0000303|PubMed:27016098};	SubName: Full=Uncharacterized protein {ECO:0000313|EMBL:PKU80137.1};	--	GO:0005634,nucleus; GO:0003677,DNA binding; GO:0003700,DNA-binding transcription factor activity; GO:0055062,phosphate ion homeostasis; GO:0006355,regulation of transcription, DNA-templated; GO:0009737,response to abscisic acid; GO:0006351,transcription, DNA-templated	--
gene-LOC110092066	8	8	23	1	7	4	NW_021319010.1	83164	84582	+	LOC110092066	--	K20716 mitogen-activated protein kinase kinase kinase 17/18 | (RefSeq) mitogen-activated protein kinase kinase kinase ANP1-like (A)	ko04016: MAPK signaling pathway - plant	mitogen-activated protein kinase kinase kinase ANP1-like [Dendrobium catenatum]	RecName: Full=Mitogen-activated protein kinase kinase kinase 18 {ECO:0000303|PubMed:26443375}; EC=2.7.11.25 {ECO:0000255|PROSITE-ProRule:PRU00159, ECO:0000269|PubMed:25680457, ECO:0000269|PubMed:26443375};	SubName: Full=Mitogen-activated protein kinase kinase kinase 2 {ECO:0000313|EMBL:PKU80143.1};	MEKK and related serine/threonine protein kinases	GO:0005737,cytoplasm; GO:0005634,nucleus; GO:0005524,ATP binding; GO:0004709,MAP kinase kinase kinase activity; GO:0004672,protein kinase activity; GO:0004674,protein serine/threonine kinase activity; GO:0004702,NA; GO:0009738,abscisic acid-activated signaling pathway; GO:0032147,activation of protein kinase activity; GO:1902457,negative regulation of stomatal opening; GO:0009789,positive regulat…	PF00069.25:Protein kinase domain
gene-LOC110092069	2578	2293	3468	2338	2918	1609	NW_021361827.1	393405	436224	+	LOC110092069	--	K14290 exportin-1 | (RefSeq) protein EXPORTIN 1A-like (A)	ko03008: Ribosome biogenesis in eukaryotes; ko03013: RNA transport	protein EXPORTIN 1A-like [Dendrobium catenatum]	RecName: Full=Protein EXPORTIN 1A {ECO:0000303|PubMed:18791220}; Short=AtCRM1 {ECO:0000303|PubMed:10652141}; Short=AtXPO1 {ECO:0000303|PubMed:10652141}; AltName: Full=Protein HEAT-INTOLERANT 2 {ECO:0000303|PubMed:20345641};	SubName: Full=Uncharacterized protein {ECO:0000313|EMBL:PKU62461.1};	Nuclear transport receptor CRM1/MSN5 (importin beta superfamily)	GO:0005829,cytosol; GO:0031965,nuclear membrane; GO:0005643,nuclear pore; GO:0005634,nucleus; GO:0005049,nuclear export signal receptor activity; GO:0008536,Ran GTPase binding; GO:0004872,NA; GO:0009553,embryo sac development; GO:0051028,mRNA transport; GO:0009555,pollen development; GO:0009846,pollen germination; GO:0009860,pollen tube growth; GO:0006611,protein export from nucleus; GO:0046825,r…	PF08767.11:CRM1 C terminal
gene-LOC110092070	12	13	9	16	21	25	NW_021361827.1	361090	361386	+	LOC110092070	--	--	--	hypothetical protein MA16_Dca022546 [Dendrobium catenatum]	--	SubName: Full=Uncharacterized protein {ECO:0000313|EMBL:PKU62458.1};	--	--	--
gene-LOC110092071	349	352	416	339	457	340	NW_021361827.1	118723	148191	+	LOC110092071	--	K15450 tRNA wybutosine-synthesizing protein 3 [EC:2.1.1.282] | (RefSeq) tRNA wybutosine-synthesizing protein 2/3/4 isoform X1 (A)	--	tRNA wybutosine-synthesizing protein 2/3/4 isoform X1 [Dendrobium catenatum]	RecName: Full=tRNA wybutosine-synthesizing protein 2/3/4; Includes: RecName: Full=tRNA wybutosine-synthesizing protein 3 homolog; Short=tRNA-yW-synthesizing protein 3; EC=2.1.1.282; AltName: Full=tRNA(Phe) 7-((3-amino-3-carboxypropyl)-4-demethylwyosine(37)-N(4))-methyltransferase; Includes: RecName: Full=tRNA wybutosine-synthesizing protein 2 homolog; Short=tRNA-yW-synthesizing protein 2; EC=2.5.…	SubName: Full=tRNA wybutosine-synthesizing protein 2/3/4 {ECO:0000313|EMBL:PKU62447.1};	Putative methyltransferase	GO:0008168,methyltransferase activity; GO:0102522,tRNA 4-demethylwyosine alpha-amino-alpha-carboxypropyltransferase activity; GO:0008033,tRNA processing	PF02676.14:Methyltransferase TYW3
gene-LOC110092072	1071	1373	1344	1567	2087	1955	NW_021319862.1	836885	859323	-	LOC110092072	--	K08506 syntaxin of plants SYP7 | (RefSeq) syntaxin-71 (A)	ko04130: SNARE interactions in vesicular transport	syntaxin-71 [Dendrobium catenatum]	RecName: Full=Syntaxin-71; Short=AtSYP71;	SubName: Full=Syntaxin-71 {ECO:0000313|EMBL:PKA63361.1};	--	GO:0005783,endoplasmic reticulum; GO:0016021,integral component of membrane; GO:0005886,plasma membrane; GO:0009506,plasmodesma; GO:0031201,SNARE complex; GO:0008565,protein transporter activity; GO:0005484,SNAP receptor activity; GO:0000149,SNARE binding; GO:0006886,intracellular protein transport; GO:0006612,protein targeting to membrane; GO:0048278,vesicle docking; GO:0006906,vesicle fusion	PF05739.19:SNARE domain
gene-LOC110092073	3896	3715	5103	2948	3619	2583	NW_021361827.1	321752	330244	+	LOC110092073	--	K03327 multidrug resistance protein, MATE family | (RefSeq) protein DETOXIFICATION 40-like (A)	--	protein DETOXIFICATION 40-like [Dendrobium catenatum]	RecName: Full=Protein DETOXIFICATION 40 {ECO:0000303|PubMed:11739388}; Short=AtDTX40 {ECO:0000303|PubMed:11739388}; AltName: Full=Multidrug and toxic compound extrusion protein 40 {ECO:0000305}; Short=MATE protein 40 {ECO:0000305};	SubName: Full=Protein TRANSPARENT TESTA 12 {ECO:0000313|EMBL:PKU62456.1};	Uncharacterized membrane protein, predicted efflux pump	GO:0016021,integral component of membrane; GO:0005774,vacuolar membrane; GO:0005773,vacuole; GO:0015297,antiporter activity; GO:0015238,drug transmembrane transporter activity; GO:0006855,drug transmembrane transport	PF01554.18:MatE
gene-LOC110092074	1651	1717	2076	2343	3441	3298	NW_021361827.1	439239	445859	+	LOC110092074	--	K22390 acid phosphatase type 7 | (RefSeq) purple acid phosphatase 18 (A)	--	purple acid phosphatase 18 [Dendrobium catenatum]	RecName: Full=Purple acid phosphatase 18; EC=3.1.3.2; Flags: Precursor;	SubName: Full=Purple acid phosphatase 18 {ECO:0000313|EMBL:PKA48668.1};	Purple acid phosphatase	GO:0005576,extracellular region; GO:0003993,acid phosphatase activity; GO:0046872,metal ion binding	PF00149.28:Calcineurin-like phosphoesterase
gene-LOC110092075	125	139	126	703	611	866	NW_021361827.1	159068	162733	-	LOC110092075	--	K17609 nucleoredoxin [EC:1.8.1.8] | (RefSeq) probable nucleoredoxin 2 (A)	--	probable nucleoredoxin 2 [Dendrobium catenatum]	RecName: Full=Probable nucleoredoxin 2; Short=OsNrx2; EC=1.8.1.8;	SubName: Full=Putative nucleoredoxin 2 {ECO:0000313|EMBL:PKU62449.1};	Thioredoxin, nucleoredoxin and related proteins	GO:0005737,cytoplasm; GO:0047134,protein-disulfide reductase activity; GO:0004791,thioredoxin-disulfide reductase activity; GO:0045454,cell redox homeostasis	PF13905.6:Thioredoxin-like
gene-LOC110092076	887	980	1095	890	1138	798	NW_021361827.1	228292	243457	+	LOC110092076	--	K14765 U3 small nucleolar ribonucleoprotein protein LCP5 | (RefSeq) neuroguidin isoform X1 (A)	--	neuroguidin isoform X1 [Dendrobium catenatum]	--	SubName: Full=Uncharacterized protein {ECO:0000313|EMBL:PKU62452.1};	Protein involved in rRNA processing	--	PF04000.15:Sas10/Utp3/C1D family
gene-LOC110092077	21	17	33	11	58	49	NW_021361827.1	256636	257671	-	LOC110092077	--	K10664 E3 ubiquitin-protein ligase ATL6/9/15/31/42/55 [EC:2.3.2.27] | (RefSeq) E3 ubiquitin-protein ligase ATL6-like (A)	--	E3 ubiquitin-protein ligase ATL6 [Dendrobium catenatum]	RecName: Full=E3 ubiquitin-protein ligase ATL31; EC=2.3.2.27 {ECO:0000269|PubMed:19702666}; AltName: Full=Protein CARBON/NITROGEN INSENSITIVE 1; AltName: Full=Protein SUPER SURVIVAL 1; AltName: Full=RING-H2 finger protein ATL31; AltName: Full=RING-type E3 ubiquitin transferase ATL31 {ECO:0000305}; Flags: Precursor;	SubName: Full=E3 ubiquitin-protein ligase ATL6 {ECO:0000313|EMBL:PKU62453.1};	FOG: Predicted E3 ubiquitin ligase	GO:0016021,integral component of membrane; GO:0016020,membrane; GO:0046872,metal ion binding; GO:0061630,ubiquitin protein ligase activity; GO:0004842,ubiquitin-protein transferase activity; GO:0043562,cellular response to nitrogen levels; GO:0009816,defense response to bacterium, incompatible interaction; GO:0009814,defense response, incompatible interaction; GO:0043161,proteasome-mediated ubiqu…	PF13639.6:Ring finger domain
gene-LOC110092078	181	227	309	230	283	268	NW_021361827.1	65637	86126	+	LOC110092078	--	K12951 cobalt/nickel-transporting P-type ATPase D [EC:3.6.3.-] | (RefSeq) protein RRP6-like 3 isoform X1 (A)	--	protein RRP6-like 3 isoform X1 [Dendrobium catenatum]	RecName: Full=Protein RRP6-like 3 {ECO:0000303|PubMed:18285452}; Short=AtRRP6L3 {ECO:0000303|PubMed:18285452};	SubName: Full=Uncharacterized protein {ECO:0000313|EMBL:PKU62444.1};	Predicted 3'-5' exonuclease	GO:0005737,cytoplasm; GO:0005829,cytosol; GO:0008408,3'-5' exonuclease activity; GO:0003676,nucleic acid binding; GO:0000166,nucleotide binding	PF00570.23:HRDC domain
gene-LOC110092079	138	114	188	34	62	70	NW_021361827.1	90349	91040	-	LOC110092079	--	--	--	uncharacterized protein LOC110092079 [Dendrobium catenatum]	--	SubName: Full=Uncharacterized protein {ECO:0000313|EMBL:PKU62445.1};	--	--	--
gene-LOC110092080	179	187	207	269	239	217	NW_021319862.1	829549	835147	-	LOC110092080	--	K04082 molecular chaperone HscB | (RefSeq) uncharacterized protein LOC110092080 (A)	--	uncharacterized protein LOC110092080 [Dendrobium catenatum]	--	SubName: Full=Uncharacterized protein {ECO:0000313|EMBL:PKU67070.1};	Mitochondrial J-type chaperone	--	PF07743.13:HSCB C-terminal oligomerisation domain
gene-LOC110092081	209	223	352	245	274	204	NW_021361827.1	274387	278031	-	LOC110092081	--	--	--	uncharacterized protein LOC110092081 [Dendrobium catenatum]	RecName: Full=Uncharacterized protein At5g41620;	SubName: Full=Uncharacterized protein {ECO:0000313|EMBL:PKU62455.1};	--	GO:0009507,chloroplast; GO:0005886,plasma membrane	--
gene-LOC110092083	207	295	313	223	269	296	NW_021361827.1	368257	387971	+	LOC110092083	--	K00949 thiamine pyrophosphokinase [EC:2.7.6.2] | (RefSeq) thiamine pyrophosphokinase 3-like isoform X1 (A)	ko00730: Thiamine metabolism	thiamine pyrophosphokinase 3-like isoform X1 [Dendrobium catenatum]	RecName: Full=Thiamine pyrophosphokinase 1; Short=OsTPK1; EC=2.7.6.2; AltName: Full=Thiamine kinase 1;	SubName: Full=Thiamine pyrophosphokinase {ECO:0000313|EMBL:PKU62460.1};	Thiamine pyrophosphokinase	GO:0005829,cytosol; GO:0005524,ATP binding; GO:0016301,kinase activity; GO:0030975,thiamine binding; GO:0004788,thiamine diphosphokinase activity; GO:0009229,thiamine diphosphate biosynthetic process; GO:0006772,thiamine metabolic process	PF04263.16:Thiamin pyrophosphokinase, catalytic domain
gene-LOC110092084	15	24	4	62	58	51	NW_021318693.1	485810	512529	+	LOC110092084	--	K15032 mTERF domain-containing protein, mitochondrial | (RefSeq) uncharacterized LOC105350907 (A)	--	uncharacterized protein LOC110092084 isoform X1 [Dendrobium catenatum]	--	SubName: Full=Uncharacterized protein {ECO:0000313|EMBL:PKU84152.1};	--	--	--
gene-LOC110092085	391	320	456	351	546	273	NW_021318693.1	248532	254222	-	LOC110092085	--	--	--	A-kinase anchor protein 9 [Dendrobium catenatum]	--	SubName: Full=Uncharacterized protein {ECO:0000313|EMBL:PKU84151.1};	--	--	PF10358.9:N-terminal C2 in EEIG1 and EHBP1 proteins
gene-LOC110092087	0	0	1	16	12	9	NW_021319878.1	254710	257861	-	LOC110092087	--	K12639 cytochrome P450 family 724 subfamily B polypeptide 1 [EC:1.14.13.-] | (RefSeq) cytochrome P450 724B1-like (A)	ko00905: Brassinosteroid biosynthesis	cytochrome P450 724B1-like [Dendrobium catenatum]	RecName: Full=Cytochrome P450 724B1; EC=1.14.-.-; AltName: Full=Dwarf protein 11; AltName: Full=OsDWARF11;	SubName: Full=Cytochrome P450 724B1 {ECO:0000313|EMBL:PKU66874.1};	Cytochrome P450 CYP4/CYP19/CYP26 subfamilies	GO:0005623,cell; GO:0016021,integral component of membrane; GO:0008199,ferric iron binding; GO:0020037,heme binding; GO:0004497,monooxygenase activity; GO:0016705,oxidoreductase activity, acting on paired donors, with incorporation or reduction of molecular oxygen; GO:0016132,brassinosteroid biosynthetic process; GO:0010268,brassinosteroid homeostasis; GO:0006879,cellular iron ion homeostasis; GO…	PF00067.22:Cytochrome P450
gene-LOC110092088	107	116	121	143	194	352	NW_021319862.1	466984	485621	-	LOC110092088	--	K13348 protein Mpv17 | (RefSeq) protein Mpv17 isoform X1 (A)	ko04146: Peroxisome	protein Mpv17 isoform X1 [Dendrobium catenatum]	RecName: Full=Peroxisomal membrane protein PMP22; AltName: Full=22 kDa peroxisomal membrane protein;	SubName: Full=Peroxisomal membrane protein PMP22 {ECO:0000313|EMBL:PKU67053.1};	Peroxisomal membrane protein MPV17 and related proteins	GO:0005779,integral component of peroxisomal membrane	PF04117.12:Mpv17 / PMP22 family
gene-LOC110092089	89	87	125	68	78	47	NW_021319878.1	406174	409560	+	LOC110092089	--	K17964 leucine-rich PPR motif-containing protein, mitochondrial | (RefSeq) pentatricopeptide repeat-containing protein At5g61990, mitochondrial (A)	--	pentatricopeptide repeat-containing protein At5g14080 [Dendrobium catenatum]	RecName: Full=Pentatricopeptide repeat-containing protein At5g14080;	SubName: Full=Pentatricopeptide repeat-containing protein {ECO:0000313|EMBL:PKU66882.1};	FOG: PPR repeat	GO:0009507,chloroplast; GO:0043231,intracellular membrane-bounded organelle; GO:0004519,endonuclease activity; GO:0003723,RNA binding; GO:0009451,RNA modification	PF13041.6:PPR repeat family
gene-LOC110092090	152	193	211	136	201	89	NW_021319878.1	456671	467631	-	LOC110092090	--	--	--	meiotic nuclear division protein 1 homolog isoform X1 [Dendrobium catenatum]	RecName: Full=Meiotic nuclear division protein 1 homolog; Short=AtMND1; AltName: Full=Meiotic nuclear division 1-like protein;	SubName: Full=Meiotic nuclear division protein 1 like {ECO:0000313|EMBL:PKU66888.1};	Protein involved in meiotic recombination/predicted coiled-coil protein	GO:0005730,nucleolus; GO:0005634,nucleus; GO:0003690,double-stranded DNA binding; GO:0006302,double-strand break repair; GO:0009553,embryo sac development; GO:0009555,pollen development; GO:0007131,reciprocal meiotic recombination; GO:0010212,response to ionizing radiation	PF03962.15:Mnd1 HTH domain
gene-LOC110092091	41	29	51	33	26	28	NW_021319878.1	424993	437304	-	LOC110092091	--	K22262 WD repeat and FYVE domain-containing protein 3 | (RefSeq) protein SPIRRIG (A)	--	pentatricopeptide repeat-containing protein At4g18520-like [Dendrobium catenatum]	RecName: Full=Pentatricopeptide repeat-containing protein At3g03580;	SubName: Full=Pentatricopeptide repeat-containing protein {ECO:0000313|EMBL:PKU66884.1};	FOG: PPR repeat	GO:0043231,intracellular membrane-bounded organelle; GO:0004519,endonuclease activity; GO:0003723,RNA binding; GO:0008270,zinc ion binding; GO:0009451,RNA modification	PF01535.20:PPR repeat
gene-LOC110092092	0	3	5	23	19	24	NW_021319878.1	482935	513815	-	LOC110092092	--	K05643 ATP-binding cassette, subfamily A (ABC1), member 3 | (RefSeq) ABC transporter A family member 1 isoform X1 (A)	ko02010: ABC transporters	ABC transporter A family member 2-like [Dendrobium catenatum]	RecName: Full=ABC transporter A family member 2; Short=ABC transporter ABCA.2; Short=AtABCA2; AltName: Full=ABC2 homolog 1;	SubName: Full=ABC transporter A family member 2 {ECO:0000313|EMBL:PKU66891.1};	Lipid exporter ABCA1 and related proteins, ABC superfamily	GO:0016021,integral component of membrane; GO:0043231,intracellular membrane-bounded organelle; GO:0005524,ATP binding; GO:0042626,ATPase activity, coupled to transmembrane movement of substances; GO:0005215,transporter activity; GO:0006869,lipid transport	PF00005.27:ABC transporter
gene-LOC110092095	0	1	1	12	2	2	NW_021319878.1	233210	234133	-	LOC110092095	--	K01528 dynamin GTPase [EC:3.6.5.5] | (Kazusa) Lj0g3v0199559.2; - (A)	ko04144: Endocytosis	uncharacterized protein LOC110092095 [Dendrobium catenatum]	RecName: Full=Retrovirus-related Pol polyprotein from transposon RE1; AltName: Full=Retro element 1 {ECO:0000303|PubMed:10689195}; Short=AtRE1 {ECO:0000303|PubMed:10689195}; Includes: RecName: Full=Protease RE1; EC=3.4.23.-; Includes: RecName: Full=Reverse transcriptase RE1; EC=2.7.7.49; Includes: RecName: Full=Endonuclease RE1;	SubName: Full=Retrovirus-related Pol polyprotein from transposon TNT 1-94 {ECO:0000313|EMBL:PKU81762.1};	FOG: Transposon-encoded proteins with TYA, reverse transcriptase, integrase domains in various combinations	GO:0004190,aspartic-type endopeptidase activity; GO:0004519,endonuclease activity; GO:0046872,metal ion binding; GO:0003676,nucleic acid binding; GO:0003964,RNA-directed DNA polymerase activity; GO:0015074,DNA integration; GO:0006310,DNA recombination	PF07727.14:Reverse transcriptase (RNA-dependent DNA polymerase)
gene-LOC110092096	0	2	1	4	0	0	NW_021319878.1	280128	281566	-	LOC110092096	--	K13420 LRR receptor-like serine/threonine-protein kinase FLS2 [EC:2.7.11.1] | (RefSeq) LRR receptor-like serine/threonine-protein kinase FLS2 (A)	ko04016: MAPK signaling pathway - plant; ko04626: Plant-pathogen interaction	receptor-like protein 51 [Dendrobium catenatum]	RecName: Full=Receptor-like protein 51 {ECO:0000303|PubMed:18434605}; Short=AtRLP51 {ECO:0000303|PubMed:18434605}; AltName: Full=Protein PUTATIVE DEVELOPMENTAL ORTHOLOG 1 {ECO:0000303|PubMed:15955925}; Short=AtPDO1 {ECO:0000303|PubMed:15955925}; AltName: Full=Protein SUPPRESSOR OF NPR1-1, CONSTITUTIVE 2 {ECO:0000303|PubMed:20841424}; Flags: Precursor;	SubName: Full=LRR receptor-like serine/threonine-protein kinase FLS2 {ECO:0000313|EMBL:PKU66875.1};	FOG: Leucine rich repeat	GO:0016021,integral component of membrane; GO:0005886,plasma membrane; GO:0006952,defense response; GO:1900426,positive regulation of defense response to bacterium; GO:1902290,positive regulation of defense response to oomycetes; GO:0031347,regulation of defense response; GO:0009617,response to bacterium	PF13855.6:Leucine rich repeat
gene-LOC110092097	144	161	209	215	340	276	NW_021319878.1	292391	306431	-	LOC110092097	--	K11418 histone deacetylase 11 [EC:3.5.1.98] | (RefSeq) hypothetical protein (A)	--	F-box protein At5g52880 isoform X1 [Dendrobium catenatum]	RecName: Full=F-box protein At5g52880;	SubName: Full=F-box protein {ECO:0000313|EMBL:PKU66876.1};	--	GO:0000151,ubiquitin ligase complex; GO:0043161,proteasome-mediated ubiquitin-dependent protein catabolic process	PF12937.7:F-box-like
gene-LOC110092098	0	0	0	0	2	0	NW_021319862.1	648356	663682	+	LOC110092098	--	--	--	homeobox protein ATH1-like [Dendrobium catenatum]	RecName: Full=Homeobox protein ATH1;	SubName: Full=Homeobox protein ATH1 {ECO:0000313|EMBL:PKU67063.1};	Transcription factor MEIS1 and related HOX domain proteins	GO:0005634,nucleus; GO:0003677,DNA binding; GO:0003700,DNA-binding transcription factor activity; GO:0043565,sequence-specific DNA binding; GO:0010227,floral organ abscission; GO:0008285,negative regulation of cell proliferation; GO:0009640,photomorphogenesis; GO:0010371,regulation of gibberellin biosynthetic process; GO:0090470,shoot organ boundary specification; GO:0006351,transcription, DNA-te…	PF07526.11:Associated with HOX
gene-LOC110092099	135	104	156	159	208	184	NW_021319878.1	290139	291574	-	LOC110092099	--	K10664 E3 ubiquitin-protein ligase ATL6/9/15/31/42/55 [EC:2.3.2.27] | (RefSeq) RING-H2 finger protein ATL34-like (A)	--	RING-H2 finger protein ATL67-like [Dendrobium catenatum]	RecName: Full=RING-H2 finger protein ATL67; EC=2.3.2.27 {ECO:0000305}; AltName: Full=RING-type E3 ubiquitin transferase ATL67 {ECO:0000305};	SubName: Full=RING-H2 finger protein ATL68 {ECO:0000313|EMBL:PKA64325.1}; EC=2.3.-.- {ECO:0000313|EMBL:PKA64325.1};	FOG: Predicted E3 ubiquitin ligase	GO:0016021,integral component of membrane; GO:0046872,metal ion binding; GO:0061630,ubiquitin protein ligase activity; GO:0043161,proteasome-mediated ubiquitin-dependent protein catabolic process	PF13639.6:Ring finger domain
gene-LOC110092100	356	433	385	351	556	380	NW_021319878.1	344078	389631	+	LOC110092100	--	--	--	protein MICRORCHIDIA 7-like isoform X1 [Dendrobium catenatum]	RecName: Full=Protein MICRORCHIDIA 7 {ECO:0000303|PubMed:24799676}; Short=AtMORC7 {ECO:0000303|PubMed:24799676}; EC=3.6.-.-; AltName: Full=Protein CRT1-homolog 3 {ECO:0000303|PubMed:19704828}; Short=CRT1-h3 {ECO:0000303|PubMed:19704828};	SubName: Full=Uncharacterized protein {ECO:0000313|EMBL:PKU66880.1};	MORC family ATPases	GO:0016020,membrane; GO:0016604,nuclear body; GO:0005654,nucleoplasm; GO:0005634,nucleus; GO:0005524,ATP binding; GO:0016887,ATPase activity; GO:0003677,DNA binding; GO:0004519,endonuclease activity; GO:0016301,kinase activity; GO:0043621,protein self-association; GO:0003723,RNA binding; GO:0016569,covalent chromatin modification; GO:0006952,defense response; GO:0006281,DNA repair; GO:0031047,gen…	PF17942.1:Morc6 ribosomal protein S5 domain 2-like
gene-LOC110092101	733	688	1022	681	750	557	NW_021319878.1	331861	342159	+	LOC110092101	--	K03100 signal peptidase I [EC:3.4.21.89] | (RefSeq) probable thylakoidal processing peptidase 2, chloroplastic (A)	ko03060: Protein export	probable thylakoidal processing peptidase 2, chloroplastic [Dendrobium catenatum]	RecName: Full=Probable thylakoidal processing peptidase 2, chloroplastic; EC=3.4.21.89; AltName: Full=Signal peptidase I-2; Flags: Precursor;	SubName: Full=Putative thylakoidal processing peptidase 2, chloroplastic {ECO:0000313|EMBL:PKU66879.1};	Mitochondrial inner membrane protease, subunit IMP1	GO:0009535,chloroplast thylakoid membrane; GO:0016021,integral component of membrane; GO:0008236,serine-type peptidase activity	PF10502.9:Signal peptidase, peptidase S26
gene-LOC110092102	1805	2407	1793	1235	2323	1782	NW_021319878.1	307517	324571	-	LOC110092102	--	K03768 peptidyl-prolyl cis-trans isomerase B (cyclophilin B) [EC:5.2.1.8] | (RefSeq) photosynthetic NDH subunit of lumenal location 5, chloroplastic-like (A)	--	photosynthetic NDH subunit of lumenal location 5, chloroplastic-like [Dendrobium catenatum]	RecName: Full=Photosynthetic NDH subunit of lumenal location 5, chloroplastic {ECO:0000303|PubMed:21785130}; AltName: Full=Cyclophilin of 20 kDa 2; AltName: Full=Peptidyl-prolyl cis-trans isomerase CYP20-2; Short=PPIase CYP20-2; EC=5.2.1.8; AltName: Full=Rotamase CYP20-2; AltName: Full=Thylakoid lumen PPIase of 20 kDa; Short=TLP20; Flags: Precursor;	SubName: Full=Peptidyl-prolyl cis-trans isomerase CYP20-2, chloroplastic {ECO:0000313|EMBL:PKU66877.1};	Peptidyl-prolyl cis-trans isomerase	GO:0009507,chloroplast; GO:0009533,chloroplast stromal thylakoid; GO:0009534,chloroplast thylakoid; GO:0009535,chloroplast thylakoid membrane; GO:0009579,thylakoid; GO:0031977,thylakoid lumen; GO:0003755,peptidyl-prolyl cis-trans isomerase activity; GO:0043424,protein histidine kinase binding; GO:0010275,NAD(P)H dehydrogenase complex assembly; GO:0006457,protein folding	PF00160.21:Cyclophilin type peptidyl-prolyl cis-trans isomerase/CLD
gene-LOC110092103	1618	1654	1950	1544	2124	2044	NW_021319878.1	418125	424489	+	LOC110092103	--	--	--	uncharacterized protein LOC110092103 isoform X2 [Dendrobium catenatum]	--	SubName: Full=Uncharacterized protein {ECO:0000313|EMBL:PKU66883.1};	--	--	--
gene-LOC110092104	138	131	142	313	277	98	NW_021319878.1	541653	543288	-	LOC110092104	--	--	--	extensin-2-like [Dendrobium catenatum]	--	SubName: Full=Uncharacterized protein {ECO:0000313|EMBL:PKU66892.1};	--	--	--
gene-LOC110092105	189	164	207	256	263	190	NW_021319878.1	442912	446239	-	LOC110092105	--	--	--	uncharacterized protein LOC110092106 [Dendrobium catenatum]	--	SubName: Full=Uncharacterized protein {ECO:0000313|EMBL:PKU66886.1};	--	--	--
gene-LOC110092106	14	37	43	169	211	155	NW_021319878.1	451987	455009	-	LOC110092106	--	--	--	uncharacterized protein LOC110092106 [Dendrobium catenatum]	--	SubName: Full=Uncharacterized protein {ECO:0000313|EMBL:PKU66886.1};	--	--	--
gene-LOC110092107	7	4	4	9	0	9	NW_021319878.1	479570	481306	-	LOC110092107	--	K08486 syntaxin 1B/2/3 | (RefSeq) syntaxin-124 (A)	ko04130: SNARE interactions in vesicular transport	syntaxin-124 [Dendrobium catenatum]	RecName: Full=Syntaxin-124; Short=AtSYP124;	SubName: Full=Syntaxin-124 {ECO:0000313|EMBL:PKU66890.1};	SNARE protein Syntaxin 1 and related proteins	GO:0016021,integral component of membrane; GO:0005886,plasma membrane; GO:0031201,SNARE complex; GO:0030133,transport vesicle; GO:0005484,SNAP receptor activity; GO:0000149,SNARE binding; GO:0006887,exocytosis; GO:0006886,intracellular protein transport; GO:0009860,pollen tube growth; GO:0048278,vesicle docking; GO:0006906,vesicle fusion	PF00804.25:Syntaxin
gene-LOC110092108	50	39	75	58	125	28	NW_021319878.1	470556	475317	+	LOC110092108	--	--	--	Uncharacterized protein MA16_Dca021571 [Dendrobium catenatum]	RecName: Full=Uncharacterized protein At4g08330, chloroplastic; Flags: Precursor;	SubName: Full=Uncharacterized protein {ECO:0000313|EMBL:PKU66889.1};	--	GO:0009507,chloroplast; GO:0005886,plasma membrane	--
gene-LOC110092109	59	57	53	116	56	56	NW_021319878.1	438155	441338	+	LOC110092109	--	--	--	protein FAM136A-like [Dendrobium catenatum]	--	SubName: Full=Uncharacterized protein {ECO:0000313|EMBL:PKU66885.1};	Uncharacterized conserved protein	--	PF05811.13:Eukaryotic protein of unknown function (DUF842)
gene-LOC110092110	289	323	382	300	462	483	NW_021319878.1	390962	405385	-	LOC110092110	--	K11649 SWI/SNF related-matrix-associated actin-dependent regulator of chromatin subfamily C | (RefSeq) SWI/SNF complex subunit SWI3A (A)	--	SWI/SNF complex subunit SWI3A [Dendrobium catenatum]	RecName: Full=SWI/SNF complex subunit SWI3A; Short=AtSWI3A; AltName: Full=Transcription regulatory protein SWI3A;	SubName: Full=SWI/SNF complex subunit SWI3A {ECO:0000313|EMBL:PKU66881.1};	Chromatin remodeling factor subunit and related transcription factors	GO:0016514,SWI/SNF complex; GO:0003677,DNA binding; GO:0006338,chromatin remodeling; GO:0016569,covalent chromatin modification; GO:0007275,multicellular organism development; GO:0006355,regulation of transcription, DNA-templated; GO:0006351,transcription, DNA-templated	PF04433.17:SWIRM domain
gene-LOC110092112	752	882	1021	556	834	638	NW_021319082.1	464834	597855	-	LOC110092112	--	--	--	nudix hydrolase 3 [Dendrobium catenatum]	RecName: Full=Nudix hydrolase 3; Short=AtNUDT3; EC=3.6.1.-;	SubName: Full=Nudix hydrolase 3 {ECO:0000313|EMBL:PKU79619.1};	--	GO:0005829,cytosol; GO:0005773,vacuole; GO:0008239,dipeptidyl-peptidase activity; GO:0046872,metal ion binding	PF00293.28:NUDIX domain
gene-LOC110092114	0	0	0	0	5	0	--	--	--	--	--	--	--	--
gene-LOC110092117	13	31	31	35	19	59	NW_021319082.1	451295	456904	+	LOC110092117	--	--	--	uncharacterized protein LOC110092117 [Dendrobium catenatum]	--	SubName: Full=Uncharacterized protein {ECO:0000313|EMBL:PKU79618.1};	--	--	PF16740.5:Spindle and kinetochore-associated protein 2
gene-LOC110092118	190	190	221	221	308	163	NW_021319127.1	2885175	2889190	-	LOC110092118	--	--	--	uncharacterized protein LOC110092118 isoform X1 [Dendrobium catenatum]	--	SubName: Full=Uncharacterized protein {ECO:0000313|EMBL:PKU77775.1};	--	--	PF00583.25:Acetyltransferase (GNAT) family
gene-LOC110092119	136	107	176	93	104	75	NW_021319127.1	3206059	3207816	+	LOC110092119	--	K07213 copper chaperone | (RefSeq) hypothetical protein (A)	--	heavy metal-associated isoprenylated plant protein 32-like [Dendrobium catenatum]	RecName: Full=Heavy metal-associated isoprenylated plant protein 32 {ECO:0000303|PubMed:21072340, ECO:0000303|PubMed:23368984}; Short=AtHIP32 {ECO:0000303|PubMed:21072340, ECO:0000303|PubMed:23368984}; Flags: Precursor;	SubName: Full=Heavy metal-associated isoprenylated plant protein 26 {ECO:0000313|EMBL:PKU77795.1};	Copper chaperone	GO:0005618,cell wall; GO:0005737,cytoplasm; GO:0046914,transition metal ion binding; GO:0046916,cellular transition metal ion homeostasis; GO:0030001,metal ion transport	PF00403.26:Heavy-metal-associated domain
gene-LOC110092120	135	112	122	220	257	168	NW_021319127.1	2960816	2964562	+	LOC110092120	--	--	--	uncharacterized protein LOC110092120 [Dendrobium catenatum]	--	SubName: Full=Uncharacterized protein {ECO:0000313|EMBL:PKU77778.1};	--	--	--
gene-LOC110092121	72	73	93	173	181	214	NW_021319127.1	2664736	2674655	-	LOC110092121	--	K03327 multidrug resistance protein, MATE family | (RefSeq) protein DETOXIFICATION 35 isoform X1 (A)	--	protein DETOXIFICATION 35 isoform X1 [Dendrobium catenatum]	RecName: Full=Protein DETOXIFICATION 34 {ECO:0000303|PubMed:11739388}; Short=AtDTX34 {ECO:0000303|PubMed:11739388}; AltName: Full=Multidrug and toxic compound extrusion protein 34 {ECO:0000305}; Short=MATE protein 34 {ECO:0000305};	SubName: Full=Protein TRANSPARENT TESTA 12 {ECO:0000313|EMBL:PKU77764.1};	Uncharacterized membrane protein, predicted efflux pump	GO:0016021,integral component of membrane; GO:0015297,antiporter activity; GO:0015238,drug transmembrane transporter activity; GO:0006855,drug transmembrane transport	PF01554.18:MatE
gene-LOC110092122	1153	1212	1574	1379	1569	922	NW_021319862.1	550100	556023	+	LOC110092122	--	K12842 U2-associated protein SR140 | (RefSeq) U2 snRNP-associated SURP motif-containing protein (A)	ko03040: Spliceosome	uncharacterized protein LOC110092122 [Dendrobium catenatum]	--	SubName: Full=Uncharacterized protein {ECO:0000313|EMBL:PKU67058.1};	Abl interactor ABI-1, contains SH3 domain	--	PF10184.9:Uncharacterized conserved protein (DUF2358)
gene-LOC110092123	1130	1583	1509	3812	4044	2852	NW_021319127.1	2639948	2658208	-	LOC110092123	--	K10576 ubiquitin-conjugating enzyme E2 H [EC:2.3.2.23] | (RefSeq) ubiquitin-conjugating enzyme E2 4-like (A)	ko04120: Ubiquitin mediated proteolysis	ubiquitin-conjugating enzyme E2 4-like [Dendrobium catenatum]	RecName: Full=Ubiquitin-conjugating enzyme E2 4; EC=2.3.2.23; AltName: Full=E2 ubiquitin-conjugating enzyme 4; AltName: Full=Ubiquitin carrier protein 4; AltName: Full=Ubiquitin-conjugating enzyme E2-21 kDa 1; AltName: Full=Ubiquitin-protein ligase 4;	SubName: Full=Ubiquitin-conjugating enzyme E2 4 {ECO:0000313|EMBL:PKU77763.1};	Ubiquitin-protein ligase	GO:0005737,cytoplasm; GO:0005524,ATP binding; GO:0061630,ubiquitin protein ligase activity; GO:0031625,ubiquitin protein ligase binding; GO:0004842,ubiquitin-protein transferase activity; GO:0006511,ubiquitin-dependent protein catabolic process	PF00179.26:Ubiquitin-conjugating enzyme
gene-LOC110092124	132	142	200	174	169	168	NW_021319127.1	2743674	2768772	+	LOC110092124	--	K14944 RNA-binding protein Nova | (RefSeq) protein BTR1-like isoform X1 (A)	--	protein BTR1-like isoform X1 [Dendrobium catenatum]	RecName: Full=Protein BTR1 {ECO:0000303|PubMed:18762309}; AltName: Full=Binding to ToMV RNA 1 {ECO:0000303|PubMed:18762309};	SubName: Full=KH domain-containing protein {ECO:0000313|EMBL:PKU77768.1};	RNA-binding protein NOVA1/PASILLA and related KH domain proteins	GO:0005737,cytoplasm; GO:0003729,mRNA binding; GO:0046719,regulation by virus of viral protein levels in host cell; GO:0009735,response to cytokinin; GO:0008380,RNA splicing	PF00013.29:KH domain
gene-LOC110092125	1580	1392	2138	1428	1589	1567	NW_021319127.1	3217648	3253353	+	LOC110092125	--	--	--	mediator of RNA polymerase II transcription subunit 33A-like isoform X1 [Dendrobium catenatum]	RecName: Full=Mediator of RNA polymerase II transcription subunit 33A; AltName: Full=REF4-related 1 protein; AltName: Full=REF4-resembling 1 protein;	SubName: Full=Mediator of RNA polymerase II transcription subunit 33A {ECO:0000313|EMBL:PKU77796.1};	--	GO:0016592,mediator complex; GO:0009698,phenylpropanoid metabolic process; GO:2000762,regulation of phenylpropanoid metabolic process; GO:0006355,regulation of transcription, DNA-templated; GO:0006351,transcription, DNA-templated	--
gene-LOC110092126	276	307	341	234	240	282	NW_021319127.1	3091705	3098124	-	LOC110092126	--	--	--	uncharacterized protein LOC110092126 [Dendrobium catenatum]	--	SubName: Full=Uncharacterized protein {ECO:0000313|EMBL:PKU77789.1};	--	--	--
gene-LOC110092127	19	23	36	41	46	22	NW_021319127.1	3004020	3010693	+	LOC110092127	--	K01363 cathepsin B [EC:3.4.22.1] | (RefSeq) cathepsin B-like isoform X1 (A)	--	cathepsin B-like isoform X1 [Dendrobium catenatum]	RecName: Full=Cathepsin B-like protease 2 {ECO:0000305}; EC=3.4.22.- {ECO:0000305}; AltName: Full=Cathepsin B2 {ECO:0000305}; Short=AtCathB2 {ECO:0000303|PubMed:19453434}; Flags: Precursor;	SubName: Full=Thiol protease aleurain {ECO:0000313|EMBL:PKU77782.1};	Cysteine proteinase Cathepsin L	GO:0005615,extracellular space; GO:0005764,lysosome; GO:0005773,vacuole; GO:0004197,cysteine-type endopeptidase activity; GO:0006952,defense response; GO:0051603,proteolysis involved in cellular protein catabolic process; GO:0050790,regulation of catalytic activity	PF00112.23:Papain family cysteine protease
gene-LOC110092128	72	81	90	173	311	96	NW_021319127.1	2980255	2982713	+	LOC110092128	--	K09875 aquaporin SIP | (RefSeq) aquaporin SIP1-2-like (A)	--	aquaporin SIP1-2-like [Dendrobium catenatum]	RecName: Full=Aquaporin SIP1-2; AltName: Full=Small basic intrinsic protein 1-2; AltName: Full=ZmSIP1-2; AltName: Full=ZmSIP1;2;	SubName: Full=Aquaporin SIP1-2 {ECO:0000313|EMBL:PKU77780.1};	Aquaporin (major intrinsic protein family)	GO:0016021,integral component of membrane; GO:0015267,channel activity	PF00230.20:Major intrinsic protein
gene-LOC110092129	1197	1234	1594	944	1401	734	NW_021319127.1	2250784	2300265	+	LOC110092129	--	--	--	Acyltransferase-like protein [Dendrobium catenatum]	RecName: Full=Acyltransferase-like protein At3g26840, chloroplastic; EC=2.3.1.-; Flags: Precursor;	SubName: Full=Acyltransferase-like protein {ECO:0000313|EMBL:PKU77746.1};	--	GO:0009507,chloroplast; GO:0010287,plastoglobule; GO:0004144,diacylglycerol O-acyltransferase activity; GO:0033306,phytol metabolic process; GO:0019432,triglyceride biosynthetic process	PF00561.20:alpha/beta hydrolase fold
gene-LOC110092131	9	21	21	2	11	1	NW_021319127.1	3193731	3195211	-	LOC110092131	--	K13420 LRR receptor-like serine/threonine-protein kinase FLS2 [EC:2.7.11.1] | (RefSeq) LRR receptor-like serine/threonine-protein kinase FLS2 (A)	ko04016: MAPK signaling pathway - plant; ko04626: Plant-pathogen interaction	receptor-like protein kinase 2 [Dendrobium catenatum]	RecName: Full=DNA damage-repair/toleration protein DRT100; Flags: Precursor;	SubName: Full=DNA-damage-repair/toleration protein DRT100 {ECO:0000313|EMBL:PKU77794.1};	FOG: Leucine rich repeat	GO:0009507,chloroplast; GO:0000166,nucleotide binding; GO:0006281,DNA repair	PF12799.7:Leucine Rich repeats (2 copies)
gene-LOC110092132	749	658	987	529	573	416	NW_021319127.1	2539680	2564641	+	LOC110092132	--	--	--	uncharacterized protein LOC110092132 isoform X1 [Dendrobium catenatum]	RecName: Full=Protein CHROMATIN REMODELING 4 {ECO:0000303|PubMed:16547115}; Short=AtCHR4; EC=3.6.4.-; AltName: Full=Protein PICKLE RELATED 1 {ECO:0000303|PubMed:10570159};	SubName: Full=Uncharacterized protein {ECO:0000313|EMBL:PKU77758.1};	Predicted helicase	GO:0005634,nucleus; GO:0009506,plasmodesma; GO:0005524,ATP binding; GO:0003677,DNA binding; GO:0004386,helicase activity; GO:0046872,metal ion binding; GO:0016569,covalent chromatin modification	PF00249.31:Myb-like DNA-binding domain
gene-LOC110092133	3353	2737	4404	2621	3208	1921	NW_021319127.1	3330798	3383851	-	LOC110092133	--	--	--	cell morphogenesis protein PAG1 isoform X1 [Dendrobium catenatum]	--	SubName: Full=Uncharacterized protein {ECO:0000313|EMBL:PKU77803.1};	Fry-like conserved proteins	--	PF14228.6:Cell morphogenesis central region
gene-LOC110092134	382	344	574	330	350	158	NW_021319127.1	3325869	3332935	+	LOC110092134	--	K13754 solute carrier family 24 (sodium/potassium/calcium exchanger), member 6 | (RefSeq) cation/calcium exchanger 5 (A)	--	cation/calcium exchanger 5 [Dendrobium catenatum]	RecName: Full=Cation/calcium exchanger 5; AltName: Full=Protein CATION EXCHANGER 11;	SubName: Full=Cation/calcium exchanger 5 {ECO:0000313|EMBL:PKU77802.1};	K+-dependent Na+:Ca2+ antiporter	GO:0016021,integral component of membrane; GO:0034399,nuclear periphery; GO:0005886,plasma membrane; GO:0015297,antiporter activity; GO:0015079,potassium ion transmembrane transporter activity; GO:0015081,sodium ion transmembrane transporter activity; GO:0071805,potassium ion transmembrane transport; GO:0006814,sodium ion transport	PF01699.24:Sodium/calcium exchanger protein
gene-LOC110092135	12199	12573	13315	7687	13518	9743	NW_021319127.1	3043028	3049848	+	LOC110092135	--	K16911 ATP-dependent RNA helicase DDX21 [EC:3.6.4.13] | (RefSeq) DEAD-box ATP-dependent RNA helicase 3, chloroplastic-like (A)	--	DEAD-box ATP-dependent RNA helicase 3, chloroplastic [Dendrobium catenatum]	RecName: Full=DEAD-box ATP-dependent RNA helicase 3B, chloroplastic {ECO:0000305}; Short=ZmRH3B {ECO:0000303|PubMed:22576849}; EC=3.6.4.13 {ECO:0000305}; Flags: Precursor;	SubName: Full=DEAD-box ATP-dependent RNA helicase 3, chloroplastic {ECO:0000313|EMBL:PKU77785.1};	ATP-dependent RNA helicase	GO:0009570,chloroplast stroma; GO:0005634,nucleus; GO:0005524,ATP binding; GO:0004386,helicase activity; GO:0003723,RNA binding; GO:0008270,zinc ion binding; GO:0009658,chloroplast organization; GO:0000373,Group II intron splicing; GO:0042254,ribosome biogenesis	PF00270.29:DEAD/DEAH box helicase
gene-LOC110092136	1469	1201	1829	1702	2396	1114	NW_021319127.1	2853854	2883830	+	LOC110092136	--	K19041 E3 ubiquitin-protein ligase RNF38/44 [EC:2.3.2.27] | (RefSeq) E3 ubiquitin-protein ligase MBR2 isoform X1 (A)	--	probable E3 ubiquitin-protein ligase HIP1 isoform X1 [Dendrobium catenatum]	RecName: Full=Probable E3 ubiquitin-protein ligase HIP1; EC=2.3.2.27; AltName: Full=HAL3-interacting protein 1; Short=OsHIP1; AltName: Full=RING-H2 finger HIP1; AltName: Full=RING-type E3 ubiquitin transferase HIP1 {ECO:0000305};	SubName: Full=E3 ubiquitin ligase BIG BROTHER-related {ECO:0000313|EMBL:PKU77774.1};	FOG: Predicted E3 ubiquitin ligase	GO:0046872,metal ion binding; GO:0061630,ubiquitin protein ligase activity; GO:0043161,proteasome-mediated ubiquitin-dependent protein catabolic process; GO:0040008,regulation of growth	PF13639.6:Ring finger domain
gene-LOC110092138	949	1114	1349	1282	1138	909	NW_021319127.1	3262130	3298683	+	LOC110092138	--	K17710 pentatricopeptide repeat domain-containing protein 1 | (RefSeq) pentatricopeptide repeat-containing protein At2g18940, chloroplastic (A)	--	pentatricopeptide repeat-containing protein At2g41720 isoform X1 [Dendrobium catenatum]	RecName: Full=Pentatricopeptide repeat-containing protein At2g41720; AltName: Full=Protein EMBRYO DEFECTIVE 2654;	SubName: Full=Pentatricopeptide repeat-containing protein {ECO:0000313|EMBL:PKU77800.1};	FOG: PPR repeat	GO:0009507,chloroplast; GO:0004519,endonuclease activity; GO:0003723,RNA binding; GO:0003735,structural constituent of ribosome; GO:0010239,chloroplast mRNA processing; GO:0009793,embryo development ending in seed dormancy; GO:0009451,RNA modification; GO:0008380,RNA splicing	PF13041.6:PPR repeat family
gene-LOC110092139	552	605	750	569	663	527	NW_021319127.1	2704770	2740892	+	LOC110092139	--	--	--	uncharacterized protein LOC110092139 [Dendrobium catenatum]	RecName: Full=Increased DNA methylation 1 {ECO:0000303|PubMed:22700931}; AltName: Full=Histone H3 acetyltransferase IDM1 {ECO:0000305}; EC=2.3.1.- {ECO:0000255|PROSITE-ProRule:PRU00532}; AltName: Full=Protein ROS4 {ECO:0000303|PubMed:22733760}; AltName: Full=Repressor of silencing 4 {ECO:0000303|PubMed:22733760};	SubName: Full=Chromodomain-helicase-DNA-binding protein 4 {ECO:0000313|EMBL:PKU77767.1};	--	GO:0005634,nucleus; GO:0009506,plasmodesma; GO:0010385,double-stranded methylated DNA binding; GO:0004402,histone acetyltransferase activity; GO:0042393,histone binding; GO:0046872,metal ion binding; GO:0044154,histone H3-K14 acetylation; GO:0043971,histone H3-K18 acetylation; GO:0043972,histone H3-K23 acetylation; GO:0044030,regulation of DNA methylation; GO:0006355,regulation of transcription, …	PF16135.5:TPL-binding domain in jasmonate signalling
gene-LOC110092140	6677	7542	7789	5577	8575	5084	NW_021319127.1	3050911	3058122	+	LOC110092140	--	K02906 large subunit ribosomal protein L3 | (RefSeq) 50S ribosomal protein L3, chloroplastic (A)	ko03010: Ribosome	50S ribosomal protein L3, chloroplastic [Dendrobium catenatum]	RecName: Full=50S ribosomal protein L3-1, chloroplastic; Flags: Precursor;	SubName: Full=50S ribosomal protein L3-1, chloroplastic {ECO:0000313|EMBL:PKU77786.1};	Mitochondrial/chloroplast ribosomal protein L3	GO:0009507,chloroplast; GO:0009941,chloroplast envelope; GO:0009570,chloroplast stroma; GO:0016020,membrane; GO:0005840,ribosome; GO:0019843,rRNA binding; GO:0003735,structural constituent of ribosome; GO:0006412,translation	PF00297.22:Ribosomal protein L3
gene-LOC110092141	670	662	647	2140	2480	2389	NW_021319127.1	3058518	3069349	-	LOC110092141	--	K03283 heat shock 70kDa protein 1/2/6/8 | (RefSeq) heat shock cognate 70 kDa protein 2-like (A)	ko03040: Spliceosome; ko04141: Protein processing in endoplasmic reticulum; ko04144: Endocytosis	uncharacterized protein LOC110092141 [Dendrobium catenatum]	--	SubName: Full=Uncharacterized protein {ECO:0000313|EMBL:PKU77787.1};	--	--	PF04970.13:Lecithin retinol acyltransferase
gene-LOC110092142	130	188	90	155	311	242	NW_021319127.1	2891170	2949949	+	LOC110092142	--	--	--	uncharacterized protein LOC110092142 [Dendrobium catenatum]	RecName: Full=Protein RICE SALT SENSITIVE 3 {ECO:0000303|PubMed:23715469};	SubName: Full=Uncharacterized protein {ECO:0000313|EMBL:PKU77777.1};	--	GO:0005737,cytoplasm; GO:0005634,nucleus; GO:0006355,regulation of transcription, DNA-templated; GO:0006351,transcription, DNA-templated	PF14215.6:bHLH-MYC and R2R3-MYB transcription factors N-terminal
gene-LOC110092143	11	16	0	27	18	32	NW_021319862.1	671438	672153	+	LOC110092143	--	K14496 abscisic acid receptor PYR/PYL family | (RefSeq) abscisic acid receptor PYL2-like (A)	ko04016: MAPK signaling pathway - plant; ko04075: Plant hormone signal transduction	abscisic acid receptor PYL2-like [Dendrobium catenatum]	RecName: Full=Abscisic acid receptor PYL2; AltName: Full=PYR1-like protein 2; AltName: Full=Regulatory components of ABA receptor 14;	SubName: Full=Abscisic acid receptor PYL2 {ECO:0000313|EMBL:PKU67064.1};	--	GO:0005737,cytoplasm; GO:0005634,nucleus; GO:0005886,plasma membrane; GO:0010427,abscisic acid binding; GO:0042802,identical protein binding; GO:0042803,protein homodimerization activity; GO:0004864,protein phosphatase inhibitor activity; GO:0004872,NA; GO:0009738,abscisic acid-activated signaling pathway	PF10604.9:Polyketide cyclase / dehydrase and lipid transport
gene-LOC110092144	1555	1649	1980	2481	3290	1875	NW_021319127.1	2519089	2537847	+	LOC110092144	--	K15747 beta-ring hydroxylase [EC:1.14.-.-] | (RefSeq) protein LUTEIN DEFICIENT 5, chloroplastic (A)	ko00906: Carotenoid biosynthesis	protein LUTEIN DEFICIENT 5, chloroplastic-like [Dendrobium catenatum]	RecName: Full=Protein LUTEIN DEFICIENT 5, chloroplastic; EC=1.14.-.-; AltName: Full=Cytochrome P450 97A3; Flags: Precursor;	SubName: Full=Uncharacterized protein {ECO:0000313|EnsemblPlants:GSMUA_AchrUn_randomP10820_001};	Cytochrome P450 CYP4/CYP19/CYP26 subfamilies	GO:0009507,chloroplast; GO:0009941,chloroplast envelope; GO:0010291,carotene beta-ring hydroxylase activity; GO:0020037,heme binding; GO:0005506,iron ion binding; GO:0016705,oxidoreductase activity, acting on paired donors, with incorporation or reduction of molecular oxygen; GO:0016117,carotenoid biosynthetic process; GO:0016123,xanthophyll biosynthetic process	PF00067.22:Cytochrome P450
gene-LOC110092145	710	750	771	919	1011	1297	NW_021319127.1	2301676	2317868	+	LOC110092145	--	K04649 ubiquitin-conjugating enzyme (huntingtin interacting protein 2) [EC:2.3.2.23] | (RefSeq) ubiquitin-conjugating enzyme E2 27 (A)	ko04120: Ubiquitin mediated proteolysis	ubiquitin-conjugating enzyme E2 27 [Dendrobium catenatum]	RecName: Full=Ubiquitin-conjugating enzyme E2 27; EC=2.3.2.23; AltName: Full=E2 ubiquitin-conjugating enzyme 27; AltName: Full=Ubiquitin carrier protein 27;	SubName: Full=Ubiquitin-conjugating enzyme E2 27 {ECO:0000313|EMBL:PKA55270.1};	Ubiquitin-protein ligase	GO:0005634,nucleus; GO:0005524,ATP binding; GO:0061630,ubiquitin protein ligase activity; GO:0031625,ubiquitin protein ligase binding; GO:0043161,proteasome-mediated ubiquitin-dependent protein catabolic process; GO:0000209,protein polyubiquitination	PF00179.26:Ubiquitin-conjugating enzyme
gene-LOC110092146	119	160	142	159	126	147	NW_021319127.1	3124476	3145915	-	LOC110092146	--	K12120 phytochrome A | (RefSeq) phytochrome A1-like isoform X1 (A)	ko04712: Circadian rhythm - plant	phytochrome A1-like isoform X2 [Dendrobium catenatum]	RecName: Full=Phytochrome A1;	SubName: Full=Phytochrome A1 {ECO:0000313|EMBL:PKU77791.1};	--	GO:0005622,intracellular; GO:0000155,phosphorelay sensor kinase activity; GO:0009881,photoreceptor activity; GO:0042803,protein homodimerization activity; GO:0009584,detection of visible light; GO:0018298,protein-chromophore linkage; GO:0017006,protein-tetrapyrrole linkage; GO:0009585,red, far-red light phototransduction; GO:0006355,regulation of transcription, DNA-templated; GO:0006351,transcrip…	PF00360.20:Phytochrome region
gene-LOC110092147	1094	886	1389	918	1240	530	NW_021319127.1	3027165	3039366	-	LOC110092147	--	--	--	transmembrane protein 184B isoform X1 [Dendrobium catenatum]	RecName: Full=Protein LAZ1 homolog 1 {ECO:0000303|PubMed:20830211}; AltName: Full=Lazarus1 homolog 1 {ECO:0000303|PubMed:20830211}; Flags: Precursor;	SubName: Full=Uncharacterized protein {ECO:0000313|EMBL:PKU77784.1};	Predicted seven transmembrane receptor - rhodopsin family	GO:0016021,integral component of membrane; GO:0005215,transporter activity	PF03619.16:Organic solute transporter Ostalpha
gene-LOC110092148	742	600	920	1168	1497	781	NW_021319127.1	2826024	2841392	+	LOC110092148	--	K19476 vacuolar protein sorting-associated protein IST1 | (RefSeq) uncharacterized protein LOC103989415 (A)	ko04144: Endocytosis	uncharacterized protein LOC110092148 [Dendrobium catenatum]	--	SubName: Full=Uncharacterized protein {ECO:0000313|EMBL:PKU77773.1};	Spindle pole body protein	--	PF03398.14:Regulator of Vps4 activity in the MVB pathway
gene-LOC110092149	290	316	329	679	646	738	NW_021319127.1	3151023	3155496	-	LOC110092149	--	--	--	microtubule-associated protein 70-1-like [Dendrobium catenatum]	RecName: Full=Microtubule-associated protein 70-1; Short=AtMAP70-1; AltName: Full=70 kDa microtubule-associated protein 1;	SubName: Full=Microtubule-associated protein 70-1 {ECO:0000313|EMBL:PKU77792.1};	--	GO:0010005,cortical microtubule, transverse to long axis; GO:0009524,phragmoplast; GO:0005819,spindle; GO:0008017,microtubule binding; GO:0071555,cell wall organization; GO:0007010,cytoskeleton organization; GO:0009832,plant-type cell wall biogenesis; GO:0010051,xylem and phloem pattern formation	PF07058.11:Microtubule-associated protein 70
gene-LOC110092150	0	0	0	4	0	0	NW_021319862.1	720878	721822	-	LOC110092150	--	K07305 peptide-methionine (R)-S-oxide reductase [EC:1.8.4.12] | (RefSeq) uncharacterized mitochondrial protein AtMg00810-like (A)	--	uncharacterized protein LOC110092150 [Dendrobium catenatum]	RecName: Full=Retrovirus-related Pol polyprotein from transposon RE1; AltName: Full=Retro element 1 {ECO:0000303|PubMed:10689195}; Short=AtRE1 {ECO:0000303|PubMed:10689195}; Includes: RecName: Full=Protease RE1; EC=3.4.23.-; Includes: RecName: Full=Reverse transcriptase RE1; EC=2.7.7.49; Includes: RecName: Full=Endonuclease RE1;	SubName: Full=Retrovirus-related Pol polyprotein from transposon TNT 1-94 {ECO:0000313|EMBL:PKU60478.1};	FOG: Transposon-encoded proteins with TYA, reverse transcriptase, integrase domains in various combinations	GO:0004190,aspartic-type endopeptidase activity; GO:0004519,endonuclease activity; GO:0046872,metal ion binding; GO:0003676,nucleic acid binding; GO:0003964,RNA-directed DNA polymerase activity; GO:0015074,DNA integration; GO:0006310,DNA recombination	PF07727.14:Reverse transcriptase (RNA-dependent DNA polymerase)
gene-LOC110092151	3636	3909	3922	3514	5657	6115	NW_021319127.1	2988337	2999813	+	LOC110092151	--	K01363 cathepsin B [EC:3.4.22.1] | (RefSeq) cathepsin B-like isoform X1 (A)	--	cathepsin B-like isoform X1 [Dendrobium catenatum]	RecName: Full=Cathepsin B-like protease 2 {ECO:0000305}; EC=3.4.22.- {ECO:0000305}; AltName: Full=Cathepsin B2 {ECO:0000305}; Short=AtCathB2 {ECO:0000303|PubMed:19453434}; Flags: Precursor;	SubName: Full=Fruit bromelain {ECO:0000313|EMBL:PKA63048.1}; EC=3.4.22.1 {ECO:0000313|EMBL:PKA63048.1};	Cysteine proteinase Cathepsin L	GO:0005615,extracellular space; GO:0005764,lysosome; GO:0005773,vacuole; GO:0004197,cysteine-type endopeptidase activity; GO:0006952,defense response; GO:0051603,proteolysis involved in cellular protein catabolic process; GO:0050790,regulation of catalytic activity	PF00112.23:Papain family cysteine protease
gene-LOC110092152	1302	1213	1458	1106	1503	810	NW_021319127.1	3106285	3110032	-	LOC110092152	--	K13179 ATP-dependent RNA helicase DDX18/HAS1 [EC:3.6.4.13] | (RefSeq) DEAD-box ATP-dependent RNA helicase 50 (A)	--	DEAD-box ATP-dependent RNA helicase 50 [Dendrobium catenatum]	RecName: Full=DEAD-box ATP-dependent RNA helicase 50; EC=3.6.4.13;	SubName: Full=DEAD-box ATP-dependent RNA helicase 50 {ECO:0000313|EMBL:PKU77790.1};	ATP-dependent RNA helicase	GO:0009507,chloroplast; GO:0005737,cytoplasm; GO:0005730,nucleolus; GO:0005524,ATP binding; GO:0004004,ATP-dependent RNA helicase activity; GO:0003723,RNA binding; GO:0003724,RNA helicase activity; GO:0006968,cellular defense response; GO:0071369,cellular response to ethylene stimulus; GO:0071395,cellular response to jasmonic acid stimulus; GO:0071446,cellular response to salicylic acid stimulus;…	PF00270.29:DEAD/DEAH box helicase
gene-LOC110092153	228	312	292	376	397	319	NW_021319127.1	3016974	3026317	+	LOC110092153	--	K18696 glycerophosphodiester phosphodiesterase [EC:3.1.4.46] | (RefSeq) glycerophosphocholine phosphodiesterase GDE1-like (A)	ko00564: Glycerophospholipid metabolism	SPX domain-containing protein 4 [Dendrobium catenatum]	RecName: Full=SPX domain-containing protein 4; AltName: Full=Protein SPX DOMAIN GENE 4; Short=OsSPX4;	SubName: Full=SPX domain-containing protein 4 {ECO:0000313|EMBL:PKU77783.1};	Protein involved in vacuolar polyphosphate accumulation, contains SPX domain	GO:0005783,endoplasmic reticulum; GO:0016020,membrane; GO:0005634,nucleus; GO:0070417,cellular response to cold; GO:0016036,cellular response to phosphate starvation	PF03105.19:SPX domain
gene-LOC110092154	110	97	120	53	110	93	NW_021319127.1	2197025	2211339	+	LOC110092154	--	K22733 magnesium transporter | (RefSeq) uncharacterized protein LOC102612526 (A)	--	Pentatricopeptide repeat-containing protein [Dendrobium catenatum]	RecName: Full=Pentatricopeptide repeat-containing protein At3g26782, mitochondrial; Flags: Precursor;	SubName: Full=Pentatricopeptide repeat-containing protein {ECO:0000313|EMBL:PKU77744.1};	FOG: PPR repeat	GO:0043231,intracellular membrane-bounded organelle; GO:0005739,mitochondrion; GO:0004519,endonuclease activity; GO:0003723,RNA binding; GO:0008270,zinc ion binding; GO:0009451,RNA modification	PF13041.6:PPR repeat family
gene-LOC110092155	121	117	118	101	173	65	NW_021319127.1	2319134	2333147	-	LOC110092155	--	K00658 2-oxoglutarate dehydrogenase E2 component (dihydrolipoamide succinyltransferase) [EC:2.3.1.61] | (RefSeq) LOW QUALITY PROTEIN: dihydrolipoyllysine-residue succinyltransferase component of 2-oxoglutarate dehydrogenase complex 2, mitochondrial-like (A)	ko00020: Citrate cycle (TCA cycle); ko00310: Lysine degradation; ko00380: Tryptophan metabolism; ko01200: Carbon metabolism	uncharacterized protein At2g33490-like isoform X1 [Dendrobium catenatum]	RecName: Full=Uncharacterized protein At2g33490;	SubName: Full=Uncharacterized protein {ECO:0000313|EMBL:PKU77748.1};	--	GO:0005886,plasma membrane	PF16746.5:BAR domain of APPL family
gene-LOC110092156	1644	1661	2253	1676	2534	1401	NW_021319127.1	2339216	2350850	-	LOC110092156	--	K00658 2-oxoglutarate dehydrogenase E2 component (dihydrolipoamide succinyltransferase) [EC:2.3.1.61] | (RefSeq) dihydrolipoyllysine-residue succinyltransferase component of 2-oxoglutarate dehydrogenase complex 1, mitochondrial (A)	ko00020: Citrate cycle (TCA cycle); ko00310: Lysine degradation; ko00380: Tryptophan metabolism; ko01200: Carbon metabolism	dihydrolipoyllysine-residue succinyltransferase component of 2-oxoglutarate dehydrogenase complex 1, mitochondrial [Dendrobium catenatum]	RecName: Full=Dihydrolipoyllysine-residue succinyltransferase component of 2-oxoglutarate dehydrogenase complex 2, mitochondrial; EC=2.3.1.61; AltName: Full=2-oxoglutarate dehydrogenase complex component E2-2; Short=OGDC-E2-2; AltName: Full=Dihydrolipoamide succinyltransferase component of 2-oxoglutarate dehydrogenase complex 2; AltName: Full=E2K-2; Flags: Precursor;	SubName: Full=Dihydrolipoyllysine-residue succinyltransferase component of 2-oxoglutarate dehydrogenase complex 2, mitochondrial {ECO:0000313|EMBL:PKU77749.1};	Dihydrolipoamide succinyltransferase (2-oxoglutarate dehydrogenase, E2 subunit)	GO:0016020,membrane; GO:0005739,mitochondrion; GO:0045252,oxoglutarate dehydrogenase complex; GO:0004149,dihydrolipoyllysine-residue succinyltransferase activity; GO:0008270,zinc ion binding; GO:0033512,L-lysine catabolic process to acetyl-CoA via saccharopine; GO:0006099,tricarboxylic acid cycle	PF00198.23:2-oxoacid dehydrogenases acyltransferase (catalytic domain)
gene-LOC110092157	214	197	296	313	364	370	NW_021320146.1	300481	304658	-	LOC110092157	--	--	--	uncharacterized protein LOC110092157 [Dendrobium catenatum]	--	SubName: Full=Uncharacterized protein {ECO:0000313|EMBL:PKU63243.1};	--	--	--
gene-LOC110092158	22	57	17	47	53	75	NW_021319127.1	2355763	2357715	-	LOC110092158	--	--	--	hypothetical protein MA16_Dca005582 [Dendrobium catenatum]	--	SubName: Full=Uncharacterized protein {ECO:0000313|EMBL:PKU77750.1};	--	--	--
gene-LOC110092159	7	17	15	8	5	5	NW_021319127.1	3076517	3087189	-	LOC110092159	--	K09527 DnaJ homolog subfamily C member 7 | (RefSeq) TPR repeat-containing thioredoxin TTL1 (A)	--	inactive TPR repeat-containing thioredoxin TTL3-like isoform X2 [Dendrobium catenatum]	RecName: Full=Inactive TPR repeat-containing thioredoxin TTL3; AltName: Full=Tetratricopeptide repeat thioredoxin-like 3; AltName: Full=VH1-interacting TPR-containing protein;	SubName: Full=Inactive TPR repeat-containing thioredoxin TTL3 {ECO:0000313|EMBL:PKU77788.1};	FOG: TPR repeat	GO:0005623,cell; GO:0009734,auxin-activated signaling pathway; GO:0009742,brassinosteroid mediated signaling pathway; GO:0045454,cell redox homeostasis; GO:0010305,leaf vascular tissue pattern formation; GO:0006970,response to osmotic stress	PF00515.28:Tetratricopeptide repeat
gene-LOC110092160	2369	2321	2596	4853	7664	4035	NW_021319127.1	2816023	2816576	-	LOC110092160	--	--	--	uncharacterized protein LOC110092160 [Dendrobium catenatum]	--	SubName: Full=Uncharacterized protein {ECO:0000313|EMBL:PKU77771.1};	--	--	PF12023.8:Domain of unknown function (DUF3511)
gene-LOC110092161	100	88	135	109	89	134	NW_021319127.1	2694195	2696648	+	LOC110092161	--	K19747 BAHD acyltransferase [EC:2.3.1.-] | (RefSeq) BAHD acyltransferase DCR-like (A)	--	BAHD acyltransferase DCR-like [Dendrobium catenatum]	RecName: Full=BAHD acyltransferase DCR; EC=2.3.1.-; AltName: Full=Protein DEFECTIVE IN CUTICULAR RIDGES; AltName: Full=Protein PERMEABLE LEAVES 3;	SubName: Full=BAHD acyltransferase DCR {ECO:0000313|EMBL:PKU77766.1};	--	GO:0005737,cytoplasm; GO:0005829,cytosol; GO:0016747,transferase activity, transferring acyl groups other than amino-acyl groups; GO:0010143,cutin biosynthetic process; GO:0051179,localization; GO:0090626,plant epidermis morphogenesis; GO:0010090,trichome morphogenesis	PF02458.15:Transferase family
gene-LOC110092162	40	63	41	19	86	76	NW_021319127.1	3495055	3495591	-	LOC110092162	--	K15100 solute carrier family 25 (mitochondrial citrate transporter), member 1 | (RefSeq) mitochondrial succinate-fumarate transporter 1-like (A)	--	mitochondrial succinate-fumarate transporter 1-like [Dendrobium catenatum]	RecName: Full=Mitochondrial succinate-fumarate transporter 1; Short=AtMSFC1;	SubName: Full=Mitochondrial succinate-fumarate transporter 1 {ECO:0000313|EMBL:PKU77805.1};	Mitochondrial tricarboxylate/dicarboxylate carrier proteins	GO:0016021,integral component of membrane; GO:0005743,mitochondrial inner membrane; GO:0015141,succinate transmembrane transporter activity; GO:0015741,fumarate transport; GO:0006839,mitochondrial transport; GO:0015744,succinate transport	PF00153.27:Mitochondrial carrier protein
gene-LOC110092164	0	1	0	2	7	0	NW_021319127.1	2634626	2635471	-	LOC110092164	--	--	--	transcriptional regulator SUPERMAN-like [Dendrobium catenatum]	RecName: Full=Transcriptional regulator TAC1; AltName: Full=Protein TELOMERASE ACTIVATOR1;	SubName: Full=Transcriptional regulator TAC1 {ECO:0000313|EMBL:PKA58790.1};	--	GO:0005634,nucleus; GO:0003677,DNA binding; GO:0003700,DNA-binding transcription factor activity; GO:0046872,metal ion binding; GO:0051973,positive regulation of telomerase activity; GO:0006355,regulation of transcription, DNA-templated; GO:0006351,transcription, DNA-templated	PF13912.6:C2H2-type zinc finger
gene-LOC110092165	0	0	0	5	0	0	NW_021319862.1	492353	493122	+	LOC110092165	--	--	--	late embryogenesis abundant protein At1g64065-like [Dendrobium catenatum]	RecName: Full=Late embryogenesis abundant protein At1g64065 {ECO:0000305};	SubName: Full=Uncharacterized protein {ECO:0000313|EMBL:PKU67054.1};	--	GO:0016021,integral component of membrane	PF03168.13:Late embryogenesis abundant protein
gene-LOC110092166	730	1113	675	206	650	848	NW_021319127.1	2514743	2515782	+	LOC110092166	--	K15747 beta-ring hydroxylase [EC:1.14.-.-] | (RefSeq) protein LUTEIN DEFICIENT 5, chloroplastic (A)	ko00906: Carotenoid biosynthesis	protein LUTEIN DEFICIENT 5, chloroplastic-like [Dendrobium catenatum]	RecName: Full=Protein LUTEIN DEFICIENT 5, chloroplastic; EC=1.14.-.-; AltName: Full=Cytochrome P450 97A3; Flags: Precursor;	SubName: Full=Protein LUTEIN DEFICIENT 5, chloroplastic {ECO:0000313|EMBL:PKU77754.1};	Cytochrome P450 CYP4/CYP19/CYP26 subfamilies	GO:0009507,chloroplast; GO:0009941,chloroplast envelope; GO:0010291,carotene beta-ring hydroxylase activity; GO:0020037,heme binding; GO:0005506,iron ion binding; GO:0016705,oxidoreductase activity, acting on paired donors, with incorporation or reduction of molecular oxygen; GO:0016117,carotenoid biosynthetic process; GO:0016123,xanthophyll biosynthetic process	--
gene-LOC110092167	2885	2483	3611	1776	2101	1195	NW_021319127.1	2361664	2505761	-	LOC110092167	--	K03235 elongation factor 3 | (RefSeq) ABC transporter, conserved site (A)	--	protein ILITYHIA [Dendrobium catenatum]	RecName: Full=Protein ILITYHIA {ECO:0000312|EMBL:AEE34290.1};	SubName: Full=Uncharacterized protein {ECO:0000313|EMBL:PKU77752.1};	Protein containing adaptin N-terminal region	GO:0005829,cytosol; GO:0016020,membrane; GO:0005634,nucleus; GO:0019901,protein kinase binding; GO:0019887,protein kinase regulator activity; GO:0043022,ribosome binding; GO:0033554,cellular response to stress; GO:0042742,defense response to bacterium; GO:0009682,induced systemic resistance; GO:0045087,innate immune response; GO:0033674,positive regulation of kinase activity; GO:0006417,regulatio…	PF02985.22:HEAT repeat
gene-LOC110092169	159	100	215	113	117	54	NW_021319127.1	2582655	2614251	+	LOC110092169	--	K06627 cyclin-A | (RefSeq) cyclin-A2-1-like isoform X1 (A)	--	cyclin-A2-1-like isoform X1 [Dendrobium catenatum]	RecName: Full=Cyclin-A2-1; AltName: Full=G2/mitotic-specific cyclin-A2-1; Short=CycA2;1;	SubName: Full=Cyclin-A2-1 {ECO:0000313|EMBL:PKU77760.1};	G2/Mitotic-specific cyclin A	GO:0005634,nucleus; GO:0007049,cell cycle; GO:0051301,cell division	PF00134.23:Cyclin, N-terminal domain
gene-LOC110092170	45	77	84	77	171	166	NW_021319127.1	2171259	2175027	+	LOC110092170	--	K07579 putative methylase | (RefSeq) S-adenosyl-L-methionine-dependent methyltransferases superfamily protein (A)	--	methyltransferase-like protein 5 isoform X1 [Dendrobium catenatum]	--	SubName: Full=Uncharacterized protein {ECO:0000313|EMBL:PKA63457.1};	Predicted RNA methylase	--	PF06325.13:Ribosomal protein L11 methyltransferase (PrmA)
gene-LOC110092171	467	500	505	645	753	863	NW_021319127.1	3301272	3324232	+	LOC110092171	--	K01090 protein phosphatase [EC:3.1.3.16] | (RefSeq) protein phosphatase 2C 70 (A)	--	protein phosphatase 2C 70 [Dendrobium catenatum]	RecName: Full=Protein phosphatase 2C 70; Short=AtPP2C70; EC=3.1.3.16; AltName: Full=Kinase-associated protein phosphatase {ECO:0000303|PubMed:7973632}; AltName: Full=Protein ROOT ATTENUATED GROWTH 1 {ECO:0000303|PubMed:18162596};	SubName: Full=Protein phosphatase 2C 70 {ECO:0000313|EMBL:PKU77801.1};	Serine/threonine protein phosphatase	GO:0016021,integral component of membrane; GO:0005886,plasma membrane; GO:0050408,[pyruvate kinase]-phosphatase activity; GO:0046872,metal ion binding; GO:0004722,protein serine/threonine phosphatase activity	PF00481.21:Protein phosphatase 2C
gene-LOC110092172	126	139	181	222	399	282	NW_021319862.1	530547	531544	-	LOC110092172	--	--	--	uncharacterized protein LOC110092172 [Dendrobium catenatum]	RecName: Full=Probable membrane-associated kinase regulator 6;	SubName: Full=Putative membrane-associated kinase regulator 6 {ECO:0000313|EMBL:PKU67057.1};	--	GO:0005886,plasma membrane; GO:0009738,abscisic acid-activated signaling pathway	--
gene-LOC110092173	38	26	72	28	25	32	NW_021319127.1	3180827	3182681	-	LOC110092173	--	K23541 Ca2+/H+ antiporter, TMEM165/GDT1 family | (RefSeq) pentatricopeptide repeat-containing protein At5g04780, mitochondrial-like (A)	--	pentatricopeptide repeat-containing protein At3g56550 [Dendrobium catenatum]	RecName: Full=Pentatricopeptide repeat-containing protein At3g56550;	SubName: Full=Pentatricopeptide repeat-containing protein {ECO:0000313|EMBL:PKU77793.1};	FOG: PPR repeat	GO:0043231,intracellular membrane-bounded organelle; GO:0004519,endonuclease activity; GO:0003723,RNA binding; GO:0008270,zinc ion binding; GO:0009451,RNA modification	PF13041.6:PPR repeat family
gene-LOC110092174	28	32	28	52	100	23	NW_021319127.1	3170871	3173579	-	LOC110092174	--	K00384 thioredoxin reductase (NADPH) [EC:1.8.1.9] | (RefSeq) thioredoxin reductase 1-like (A)	ko00450: Selenocompound metabolism	germin-like protein subfamily 2 member 2 isoform X2 [Dendrobium catenatum]	RecName: Full=Germin-like protein subfamily 2 member 2; Flags: Precursor;	SubName: Full=Uncharacterized protein {ECO:0000313|EnsemblPlants:GSMUA_AchrUn_randomP00050_001};	--	GO:0048046,apoplast; GO:0005618,cell wall; GO:0009506,plasmodesma; GO:0030145,manganese ion binding; GO:0045735,nutrient reservoir activity; GO:0010497,plasmodesmata-mediated intercellular transport; GO:2000280,regulation of root development	PF00190.22:Cupin
gene-LOC110092175	195	219	242	301	300	256	NW_021319127.1	2571498	2577440	-	LOC110092175	--	K01191 alpha-mannosidase [EC:3.2.1.24] | (RefSeq) alpha-mannosidase At3g26720-like (A)	ko00511: Other glycan degradation	uncharacterized protein LOC110092175 [Dendrobium catenatum]	--	SubName: Full=Uncharacterized protein {ECO:0000313|EMBL:PKU77759.1};	--	--	PF07800.12:Protein of unknown function (DUF1644)
gene-LOC110092176	284	304	339	330	436	319	NW_021319127.1	2228479	2249811	+	LOC110092176	--	K14864 tRNA (cytidine32/guanosine34-2'-O)-methyltransferase [EC:2.1.1.205] | (RefSeq) putative tRNA (cytidine(32)/guanosine(34)-2'-O)-methyltransferase isoform X1 (A)	--	putative tRNA (cytidine(32)/guanosine(34)-2'-O)-methyltransferase isoform X1 [Dendrobium catenatum]	--	SubName: Full=tRNA (Cytidine32/guanosine34-2'-O)-methyltransferase {ECO:0000313|EMBL:PKU77745.1};	SAM-dependent methyltransferase/cell division protein FtsJ	--	PF01728.19:FtsJ-like methyltransferase
gene-LOC110092178	0	1	2	0	0	0	NW_021319127.1	2615977	2616474	-	LOC110092178	--	K14516 ethylene-responsive transcription factor 1 | (RefSeq) ethylene-responsive transcription factor 1B-like (A)	ko04016: MAPK signaling pathway - plant; ko04075: Plant hormone signal transduction	ethylene-responsive transcription factor ERF098-like [Dendrobium catenatum]	RecName: Full=Ethylene-responsive transcription factor ERF098;	SubName: Full=Ethylene-responsive transcription factor ERF098 {ECO:0000313|EMBL:PKU77761.1};	--	GO:0005634,nucleus; GO:0003677,DNA binding; GO:0003700,DNA-binding transcription factor activity; GO:0009873,ethylene-activated signaling pathway; GO:0010200,response to chitin; GO:0006351,transcription, DNA-templated	PF00847.20:AP2 domain
gene-LOC110092179	1110	1107	1222	1071	1301	1240	NW_021319939.1	39445	136902	-	LOC110092179	--	K01919 glutamate--cysteine ligase [EC:6.3.2.2] | (RefSeq) glutamate--cysteine ligase, chloroplastic (A)	ko00270: Cysteine and methionine metabolism; ko00480: Glutathione metabolism	glutamate--cysteine ligase, chloroplastic [Dendrobium catenatum]	RecName: Full=Glutamate--cysteine ligase, chloroplastic; EC=6.3.2.2; AltName: Full=Gamma-ECS; Short=GCS; AltName: Full=Gamma-glutamylcysteine synthetase; Flags: Precursor;	SubName: Full=Glutamate--cysteine ligase, chloroplastic {ECO:0000313|EMBL:PKU66093.1};	--	GO:0009507,chloroplast; GO:0005524,ATP binding; GO:0004357,glutamate-cysteine ligase activity; GO:0006750,glutathione biosynthetic process	PF04107.13:Glutamate-cysteine ligase family 2(GCS2)
gene-LOC110092182	41	51	46	38	26	19	NW_021319083.1	5609181	5616293	-	LOC110092182	--	K10398 kinesin family member 11 | (RefSeq) kinesin-like protein KIN-5C isoform X1 (A)	--	kinesin-like protein KIN-5C isoform X1 [Dendrobium catenatum]	RecName: Full=Kinesin-like protein KIN-5C {ECO:0000305};	SubName: Full=125 kDa kinesin-related protein {ECO:0000313|EMBL:PKU78829.1};	Kinesin-like protein	GO:0005737,cytoplasm; GO:0005874,microtubule; GO:0005819,spindle; GO:0005524,ATP binding; GO:0008017,microtubule binding; GO:0003777,microtubule motor activity; GO:0007018,microtubule-based movement	PF00225.23:Kinesin motor domain
gene-LOC110092183	39	36	42	39	35	39	NW_021319083.1	6034389	6060113	-	LOC110092183	--	--	--	uncharacterized protein LOC110092183 [Dendrobium catenatum]	--	SubName: Full=Uncharacterized protein {ECO:0000313|EMBL:PKU78856.1};	--	--	--
gene-LOC110092184	216	381	344	513	707	661	NW_021319083.1	5905036	5910090	+	LOC110092184	--	--	--	uncharacterized protein LOC110092184 [Dendrobium catenatum]	--	SubName: Full=Uncharacterized protein {ECO:0000313|EMBL:PKU78847.1};	--	--	--
gene-LOC110092185	17	38	24	21	24	54	NW_021319083.1	6025044	6026637	-	LOC110092185	--	K10664 E3 ubiquitin-protein ligase ATL6/9/15/31/42/55 [EC:2.3.2.27] | (RefSeq) RING-H2 finger protein ATL34-like (A)	--	RING-H2 finger protein ATL2-like [Dendrobium catenatum]	RecName: Full=RING-H2 finger protein ATL2; EC=2.3.2.27 {ECO:0000305}; AltName: Full=Protein ARABIDOPSIS TOXICOS EN LEVADURA 2; Short=Protein ATL2; AltName: Full=RING-type E3 ubiquitin transferase ATL2 {ECO:0000305};	SubName: Full=RING-H2 finger protein ATL2 {ECO:0000313|EMBL:PKU78855.1};	FOG: Predicted E3 ubiquitin ligase	GO:0016021,integral component of membrane; GO:0046872,metal ion binding; GO:0061630,ubiquitin protein ligase activity; GO:0006952,defense response; GO:0043161,proteasome-mediated ubiquitin-dependent protein catabolic process; GO:0010200,response to chitin	PF13639.6:Ring finger domain
gene-LOC110092186	197	202	252	277	261	258	NW_021319083.1	5916256	5918041	-	LOC110092186	--	--	--	basic leucine zipper 23-like [Dendrobium catenatum]	RecName: Full=Basic leucine zipper 23 {ECO:0000303|PubMed:11906833}; Short=AtbZIP23 {ECO:0000303|PubMed:11906833}; Short=bZIP protein 23 {ECO:0000305};	SubName: Full=Uncharacterized protein {ECO:0000313|EMBL:PKU78848.1};	--	GO:0005634,nucleus; GO:0003677,DNA binding; GO:0003700,DNA-binding transcription factor activity; GO:0010043,response to zinc ion; GO:0006351,transcription, DNA-templated	PF07716.15:Basic region leucine zipper
gene-LOC110092187	244	211	291	280	384	143	NW_021319083.1	5746516	5797768	-	LOC110092187	--	K11126 telomerase reverse transcriptase [EC:2.7.7.49] | (RefSeq) telomerase reverse transcriptase isoform X1 (A)	--	telomerase reverse transcriptase isoform X1 [Dendrobium catenatum]	RecName: Full=Telomerase reverse transcriptase; EC=2.7.7.49; AltName: Full=OsTERT;	SubName: Full=Telomerase reverse transcriptase {ECO:0000313|EMBL:ABB90884.1}; Flags: Fragment;	Telomerase catalytic subunit/reverse transcriptase TERT	GO:0000781,chromosome, telomeric region; GO:0000333,telomerase catalytic core complex; GO:0046872,metal ion binding; GO:0070034,telomerase RNA binding; GO:0003721,telomerase RNA reverse transcriptase activity; GO:0042162,telomeric DNA binding; GO:0007004,telomere maintenance via telomerase	PF12009.8:Telomerase ribonucleoprotein complex - RNA binding domain
gene-LOC110092188	1	2	3	9	1	0	NW_021319862.1	509647	511435	-	LOC110092188	--	--	--	probable membrane-associated kinase regulator 2 [Dendrobium catenatum]	RecName: Full=Probable membrane-associated kinase regulator 2;	SubName: Full=Putative membrane-associated kinase regulator 2 {ECO:0000313|EMBL:PKU67055.1};	--	GO:0005886,plasma membrane	--
gene-LOC110092189	202	223	315	397	417	359	NW_021319083.1	5970479	5993590	-	LOC110092189	--	K03241 translation initiation factor eIF-2B subunit gamma | (RefSeq) translation initiation factor eIF-2B subunit gamma isoform X1 (A)	ko03013: RNA transport	translation initiation factor eIF-2B subunit gamma isoform X1 [Dendrobium catenatum]	--	SubName: Full=Putative mannose-1-phosphate guanylyltransferase 2 {ECO:0000313|EMBL:PKU78854.1};	Translation initiation factor 2B, gamma subunit (eIF-2Bgamma/GCD1)	--	PF00483.23:Nucleotidyl transferase
gene-LOC110092190	266	376	394	306	446	286	NW_021319083.1	5834211	5847666	+	LOC110092190	--	K01142 exodeoxyribonuclease III [EC:3.1.11.2] | (RefSeq) DNA-(apurinic or apyrimidinic site) lyase, chloroplastic isoform X1 (A)	ko03410: Base excision repair	Apurinic endonuclease-redox protein [Dendrobium catenatum]	RecName: Full=DNA-(apurinic or apyrimidinic site) lyase, chloroplastic {ECO:0000303|PubMed:7512729}; EC=4.2.99.18 {ECO:0000255|PROSITE-ProRule:PRU00764}; AltName: Full=Apurinic endonuclease-redox protein;	SubName: Full=Apurinic endonuclease-redox protein {ECO:0000313|EMBL:PKU78843.1};	Apurinic/apyrimidinic endonuclease and related enzymes	GO:0042644,chloroplast nucleoid; GO:0005634,nucleus; GO:0008408,3'-5' exonuclease activity; GO:0140078,class I DNA-(apurinic or apyrimidinic site) endonuclease activity; GO:0140080,class III/IV DNA-(apurinic or apyrimidinic site) endonuclease activity; GO:0003677,DNA binding; GO:0003906,DNA-(apurinic or apyrimidinic site) endonuclease activity; GO:0008311,double-stranded DNA 3'-5' exodeoxyribonuc…	PF03372.23:Endonuclease/Exonuclease/phosphatase family
gene-LOC110092191	0	3	4	3	3	0	NW_021319862.1	879035	880434	-	LOC110092191	--	K09422 transcription factor MYB, plant | (RefSeq) transcription factor RAX2-like (A)	--	transcription factor RAX2-like [Dendrobium catenatum]	RecName: Full=Transcription factor RAX3; AltName: Full=Myb-related protein 84; Short=AtMYB84; AltName: Full=Protein REGULATOR OF AXILLARY MERISTEMS 3;	SubName: Full=Transcription factor RAX3 {ECO:0000313|EMBL:PKU67072.1};	Transcription factor, Myb superfamily	GO:0005634,nucleus; GO:0003700,DNA-binding transcription factor activity; GO:0000981,DNA-binding transcription factor activity, RNA polymerase II-specific; GO:0043565,sequence-specific DNA binding; GO:0001135,RNA polymerase II transcription regulator recruiting activity; GO:0044212,transcription regulatory region DNA binding; GO:0030154,cell differentiation; GO:0007275,multicellular organism deve…	PF00249.31:Myb-like DNA-binding domain
gene-LOC110092192	139	195	179	145	186	143	NW_021319083.1	5850250	5854917	+	LOC110092192	--	--	--	uncharacterized protein LOC110092192 [Dendrobium catenatum]	--	SubName: Full=Uncharacterized protein {ECO:0000313|EMBL:PKU78844.1};	--	--	--
gene-LOC110092193	1201	1365	1518	1949	3146	2267	NW_021319083.1	5918875	5927684	+	LOC110092193	--	--	--	pheophytinase, chloroplastic [Dendrobium catenatum]	RecName: Full=Pheophytinase, chloroplastic; EC=3.1.1.-; AltName: Full=Pheophytin pheophorbide hydrolase; AltName: Full=Protein CO-REGULATED WITH NYE1; Flags: Precursor;	SubName: Full=Uncharacterized protein {ECO:0000313|EMBL:PKU78849.1};	Predicted hydrolase/acyltransferase (alpha/beta hydrolase superfamily)	GO:0009507,chloroplast; GO:0009570,chloroplast stroma; GO:0009535,chloroplast thylakoid membrane; GO:0080124,pheophytinase activity; GO:0015996,chlorophyll catabolic process	PF12697.7:Alpha/beta hydrolase family
gene-LOC110092194	3684	3280	4383	2183	2959	2296	NW_021319083.1	5861543	5895780	+	LOC110092194	--	K11292 transcription elongation factor SPT6 | (RefSeq) transcription elongation factor SPT6-like isoform X1 (A)	--	transcription elongation factor SPT6-like isoform X1 [Dendrobium catenatum]	RecName: Full=Transcription elongation factor SPT6 homolog {ECO:0000305}; Short=AtSPT6 {ECO:0000303|PubMed:20139304};	SubName: Full=Uncharacterized protein {ECO:0000313|EMBL:PKU78845.1};	Transcription elongation factor SPT6	GO:0005829,cytosol; GO:0009506,plasmodesma; GO:0008023,transcription elongation factor complex; GO:0035327,transcriptionally active chromatin; GO:0003677,DNA binding; GO:0003700,DNA-binding transcription factor activity; GO:0042393,histone binding; GO:0031491,nucleosome binding; GO:0000991,NA; GO:0003746,translation elongation factor activity; GO:0070827,chromatin maintenance; GO:0006342,chromati…	PF14633.6:SH2 domain
gene-LOC110092195	1511	2859	1901	4140	4776	6180	NW_021319083.1	5595170	5604296	+	LOC110092195	--	K02927 large subunit ribosomal protein L40e | (RefSeq) ubiquitin-60S ribosomal protein L40 (A)	ko03010: Ribosome; ko04120: Ubiquitin mediated proteolysis	Ubiquitin supergroup,Ribosomal protein L40e [Theobroma cacao]	RecName: Full=Ubiquitin-60S ribosomal protein L40; Contains: RecName: Full=Ubiquitin; Contains: RecName: Full=60S ribosomal protein L40; AltName: Full=CEP52; Flags: Precursor;	SubName: Full=Ubiquitin supergroup,Ribosomal protein L40e {ECO:0000313|EMBL:EOY23660.1};	Ubiquitin/60s ribosomal protein L40 fusion	GO:0005634,nucleus; GO:0005840,ribosome; GO:0003735,structural constituent of ribosome; GO:0006412,translation	PF00240.23:Ubiquitin family
gene-LOC110092196	895	880	1142	971	1258	1219	NW_021319083.1	5638767	5658282	+	LOC110092196	--	--	--	uncharacterized protein LOC110092196 [Dendrobium catenatum]	--	SubName: Full=Uncharacterized protein {ECO:0000313|EMBL:PKU78830.1};	--	--	--
gene-LOC110092197	28	22	37	49	31	25	NW_021319083.1	5740649	5745719	+	LOC110092197	--	K22390 acid phosphatase type 7 | (RefSeq) probable inactive purple acid phosphatase 27 (A)	--	probable inactive purple acid phosphatase 27 [Dendrobium catenatum]	RecName: Full=Probable inactive purple acid phosphatase 27; Flags: Precursor;	SubName: Full=Putative inactive purple acid phosphatase 27 {ECO:0000313|EMBL:PKU78835.1};	Purple acid phosphatase	GO:0005576,extracellular region; GO:0003993,acid phosphatase activity; GO:0046872,metal ion binding	PF00149.28:Calcineurin-like phosphoesterase
gene-LOC110092198	482	548	620	682	938	998	NW_021319083.1	5961237	5965171	+	LOC110092198	--	K19034 50S ribosomal protein 5 | (RefSeq) 50S ribosomal protein 5, chloroplastic (A)	--	50S ribosomal protein 5, chloroplastic [Dendrobium catenatum]	--	SubName: Full=50S ribosomal protein 5, chloroplastic {ECO:0000313|EMBL:PKU78853.1};	--	--	--
gene-LOC110092199	135	128	240	373	427	134	NW_021319862.1	538133	545997	-	LOC110092199	--	--	--	--	--	--	--	--	--
gene-LOC110092200	137	107	211	32	56	41	NW_021319083.1	5708376	5709272	-	LOC110092200	--	K14674 TAG lipase / steryl ester hydrolase / phospholipase A2 / LPA acyltransferase [EC:3.1.1.3 3.1.1.13 3.1.1.4 2.3.1.51] | (RefSeq) triacylglycerol lipase SDP1-like (A)	ko00100: Steroid biosynthesis; ko00561: Glycerolipid metabolism; ko00564: Glycerophospholipid metabolism; ko00565: Ether lipid metabolism; ko00590: Arachidonic acid metabolism; ko00591: Linoleic acid metabolism; ko00592: alpha-Linolenic acid metabolism	triacylglycerol lipase SDP1-like [Dendrobium catenatum]	RecName: Full=Triacylglycerol lipase SDP1; EC=3.1.1.3; AltName: Full=Protein SUGAR-DEPENDENT 1;	SubName: Full=Triacylglycerol lipase SDP1 {ECO:0000313|EMBL:PKU78831.1};	Predicted esterase of the alpha-beta hydrolase superfamily	GO:0016021,integral component of membrane; GO:0012511,monolayer-surrounded lipid storage body; GO:0004806,triglyceride lipase activity; GO:0006071,glycerol metabolic process; GO:0019433,triglyceride catabolic process; GO:0006641,triglyceride metabolic process	PF11815.8:Domain of unknown function (DUF3336)
gene-LOC110092201	0	4	2	11	26	14	NW_021319083.1	5727413	5735222	+	LOC110092201	--	K22390 acid phosphatase type 7 | (RefSeq) probable inactive purple acid phosphatase 27 (A)	--	probable inactive purple acid phosphatase 27 [Dendrobium catenatum]	RecName: Full=Probable inactive purple acid phosphatase 27; Flags: Precursor;	RecName: Full=Purple acid phosphatase {ECO:0000256|RuleBase:RU361203}; EC=3.1.3.2 {ECO:0000256|RuleBase:RU361203};	Purple acid phosphatase	GO:0005576,extracellular region; GO:0003993,acid phosphatase activity; GO:0046872,metal ion binding	PF17808.1:Fn3-like domain from Purple Acid Phosphatase
gene-LOC110092202	0	0	7	22	14	20	NW_021319083.1	5716843	5718477	+	LOC110092202	--	--	--	uncharacterized protein LOC110092202 [Dendrobium catenatum]	RecName: Full=Calmodulin binding protein PICBP {ECO:0000305}; AltName: Full=Pathogen-induced CaM-binding protein {ECO:0000303|PubMed:12825696};	SubName: Full=Uncharacterized protein {ECO:0000313|EMBL:PKU78832.1};	--	GO:0005886,plasma membrane; GO:0005516,calmodulin binding; GO:0006952,defense response	PF07839.11:Plant calmodulin-binding domain
gene-LOC110092203	976	885	1220	934	1498	536	NW_021319083.1	5935655	5937050	-	LOC110092203	--	K15280 solute carrier family 35, member C2 | (RefSeq) similar to phosphate/phosphoenolpyruvate translocator protein (A)	--	probable sugar phosphate/phosphate translocator At2g25520 [Dendrobium catenatum]	RecName: Full=Probable sugar phosphate/phosphate translocator At5g25400;	SubName: Full=Putative sugar phosphate/phosphate translocator {ECO:0000313|EMBL:PKU78851.1};	Glucose-6-phosphate/phosphate and phosphoenolpyruvate/phosphate antiporter	GO:0005794,Golgi apparatus; GO:0016021,integral component of membrane; GO:0008643,carbohydrate transport; GO:0015780,nucleotide-sugar transmembrane transport	PF03151.16:Triose-phosphate Transporter family
gene-LOC110092204	407	409	572	563	664	359	NW_021319083.1	5806866	5825263	-	LOC110092204	--	--	--	uncharacterized protein LOC110092204 [Dendrobium catenatum]	--	SubName: Full=Uncharacterized protein {ECO:0000313|EMBL:PKU78842.1};	--	--	--
gene-LOC110092205	76	72	58	60	72	55	NW_021319083.1	5955561	5960610	-	LOC110092205	--	K03798 cell division protease FtsH [EC:3.4.24.-] | (RefSeq) ATP-dependent zinc metalloprotease FTSH 6, chloroplastic (A)	--	pentatricopeptide repeat-containing protein At4g21065-like [Dendrobium catenatum]	RecName: Full=Pentatricopeptide repeat-containing protein At4g21065;	SubName: Full=Pentatricopeptide repeat-containing protein {ECO:0000313|EMBL:PKU78852.1};	FOG: PPR repeat	GO:0043231,intracellular membrane-bounded organelle; GO:0004519,endonuclease activity; GO:0003723,RNA binding; GO:0008270,zinc ion binding; GO:0009451,RNA modification	PF01535.20:PPR repeat
gene-LOC110092206	761	695	856	912	1224	1211	NW_021319862.1	597898	608232	-	LOC110092206	--	--	--	uncharacterized protein LOC110092206 isoform X1 [Dendrobium catenatum]	RecName: Full=Probable WRKY transcription factor 19; AltName: Full=WRKY DNA-binding protein 19;	SubName: Full=Putative WRKY transcription factor 19 {ECO:0000313|EMBL:PKU67060.1};	--	GO:0009941,chloroplast envelope; GO:0005634,nucleus; GO:0043531,ADP binding; GO:0005524,ATP binding; GO:0003700,DNA-binding transcription factor activity; GO:0004674,protein serine/threonine kinase activity; GO:0043565,sequence-specific DNA binding; GO:0006952,defense response; GO:0006351,transcription, DNA-templated	--
gene-LOC110092207	571	610	691	601	842	465	NW_021319083.1	5897501	5902605	-	LOC110092207	--	K13448 calcium-binding protein CML | (RefSeq) probable calcium-binding protein CML50 (A)	ko04626: Plant-pathogen interaction	probable calcium-binding protein CML50 [Dendrobium catenatum]	RecName: Full=Probable calcium-binding protein CML49; AltName: Full=Calmodulin-like protein 49;	SubName: Full=Putative calcium-binding protein CML49 {ECO:0000313|EMBL:PKU78846.1};	Ca2+-binding protein, EF-Hand protein superfamily	GO:0005737,cytoplasm; GO:0005509,calcium ion binding; GO:0004198,calcium-dependent cysteine-type endopeptidase activity; GO:0006508,proteolysis	PF00036.32:EF hand
gene-LOC110092208	0	1	1	0	0	0	NW_021319083.1	5535325	5536353	-	LOC110092208	--	K00521 ferric-chelate reductase [EC:1.16.1.7] | (RefSeq) ferric reduction oxidase 7, chloroplastic-like (A)	--	NAC domain-containing protein 90-like [Dendrobium catenatum]	RecName: Full=NAC domain-containing protein 90; Short=ANAC090;	SubName: Full=NAC domain-containing protein 90 {ECO:0000313|EMBL:PKU78827.1};	--	GO:0005634,nucleus; GO:0003677,DNA binding; GO:0003700,DNA-binding transcription factor activity; GO:0006351,transcription, DNA-templated	PF02365.15:No apical meristem (NAM) protein
gene-LOC110092209	120	124	217	148	162	123	NW_021319750.1	281543	306221	-	LOC110092209	--	--	--	uncharacterized protein LOC110092209 isoform X1 [Dendrobium catenatum]	--	SubName: Full=Uncharacterized protein {ECO:0000313|EMBL:PKA63502.1};	--	--	--
gene-LOC110092210	2774	2522	3458	1868	2697	1462	NW_021319750.1	255770	277643	-	LOC110092210	--	K14558 periodic tryptophan protein 2 | (RefSeq) protein TOPLESS isoform X1 (A)	ko03008: Ribosome biogenesis in eukaryotes	protein TPR3-like [Dendrobium catenatum]	RecName: Full=Protein TOPLESS; AltName: Full=WUS-interacting protein 1;	SubName: Full=Protein TOPLESS {ECO:0000313|EMBL:PKU68259.1};	WD40 repeat-containing protein	GO:0005829,cytosol; GO:0005634,nucleus; GO:0042802,identical protein binding; GO:0042803,protein homodimerization activity; GO:0009867,jasmonic acid mediated signaling pathway; GO:0045892,negative regulation of transcription, DNA-templated; GO:0010072,primary shoot apical meristem specification; GO:0009733,response to auxin; GO:0006351,transcription, DNA-templated; GO:0010051,xylem and phloem pat…	PF00400.32:WD domain, G-beta repeat
gene-LOC110092211	1054	1295	1100	999	1844	1948	NW_021319750.1	228504	254695	+	LOC110092211	--	K01056 peptidyl-tRNA hydrolase, PTH1 family [EC:3.1.1.29] | (RefSeq) chloroplastic group IIB intron splicing facilitator CRS2, chloroplastic isoform X1 (A)	--	chloroplastic group IIB intron splicing facilitator CRS2, chloroplastic isoform X1 [Dendrobium catenatum]	RecName: Full=Chloroplastic group IIB intron splicing facilitator CRS2, chloroplastic; AltName: Full=Chloroplastic RNA splicing factor 2; AltName: Full=Protein CHLOROPLAST RNA SPLICING 2; Flags: Precursor;	SubName: Full=Chloroplastic group IIB intron splicing facilitator CRS2, chloroplastic {ECO:0000313|EMBL:PKU68258.1};	Peptidyl-tRNA hydrolase	GO:0009570,chloroplast stroma; GO:0030529,NA; GO:0004045,aminoacyl-tRNA hydrolase activity; GO:0006397,mRNA processing; GO:0008380,RNA splicing	PF01195.19:Peptidyl-tRNA hydrolase
gene-LOC110092212	1568	1751	1770	1650	1688	1892	NW_021319750.1	31173	48993	+	LOC110092212	--	K02133 F-type H+-transporting ATPase subunit beta [EC:3.6.3.14] | (RefSeq) ATP synthase subunit beta, mitochondrial-like (A)	ko00190: Oxidative phosphorylation	ATP synthase subunit beta, mitochondrial-like [Dendrobium catenatum]	RecName: Full=ATP synthase subunit beta, mitochondrial; EC=3.6.3.14; Flags: Precursor;	SubName: Full=ATP synthase subunit beta, mitochondrial {ECO:0000313|EMBL:PKU68251.1};	F0F1-type ATP synthase, beta subunit	GO:0000275,mitochondrial proton-transporting ATP synthase complex, catalytic core F(1); GO:0005524,ATP binding; GO:0046933,proton-transporting ATP synthase activity, rotational mechanism; GO:0015986,ATP synthesis coupled proton transport	PF00006.25:ATP synthase alpha/beta family, nucleotide-binding domain
gene-LOC110092213	3050	2942	3339	2308	3028	2830	NW_021319750.1	322545	335948	+	LOC110092213	--	K15172 transcription elongation factor SPT5 | (RefSeq) putative transcription elongation factor SPT5 homolog 1 (A)	--	Putative transcription elongation factor SPT5 like 1 [Dendrobium catenatum]	RecName: Full=Putative transcription elongation factor SPT5 homolog 1;	SubName: Full=Transcription elongation factor SPT5 like 1 {ECO:0000313|EMBL:PKU68263.1};	RNA polymerase II transcription elongation factor DSIF/SUPT5H/SPT5	GO:0032044,DSIF complex; GO:0005840,ribosome; GO:0003677,DNA binding; GO:0003729,mRNA binding; GO:0003735,structural constituent of ribosome; GO:0006397,mRNA processing; GO:0032784,regulation of DNA-templated transcription, elongation; GO:0006357,regulation of transcription by RNA polymerase II; GO:0006368,transcription elongation from RNA polymerase II promoter; GO:0006412,translation	PF03439.13:Early transcription elongation factor of RNA pol II, NGN section
gene-LOC110092214	212	379	246	482	420	473	NW_021319750.1	117490	144510	+	LOC110092214	--	K13288 oligoribonuclease [EC:3.1.-.-] | (RefSeq) oligoribonuclease isoform X1 (A)	ko03008: Ribosome biogenesis in eukaryotes	oligoribonuclease isoform X1 [Dendrobium catenatum]	RecName: Full=Oligoribonuclease; EC=3.1.-.-;	SubName: Full=Oligoribonuclease {ECO:0000313|EMBL:PKU68254.1};	Oligoribonuclease (3'->5' exoribonuclease)	GO:0005739,mitochondrion; GO:0000175,3'-5'-exoribonuclease activity; GO:0003676,nucleic acid binding; GO:0090305,nucleic acid phosphodiester bond hydrolysis	PF00929.24:Exonuclease
gene-LOC110092215	802	763	970	826	1067	915	NW_021319750.1	50312	78994	+	LOC110092215	--	K08150 MFS transporter, SP family, solute carrier family 2 (myo-inositol transporter), member 13 | (RefSeq) inositol transporter 1-like (A)	--	plastidic glucose transporter 4 [Dendrobium catenatum]	RecName: Full=Plastidic glucose transporter 4; Short=AtpGlcT;	SubName: Full=Plastidic glucose transporter 4 {ECO:0000313|EMBL:PKA63545.1};	Predicted transporter (major facilitator superfamily)	GO:0009941,chloroplast envelope; GO:0009706,chloroplast inner membrane; GO:0016021,integral component of membrane; GO:0005355,glucose transmembrane transporter activity; GO:0005351,carbohydrate:proton symporter activity; GO:0046323,glucose import; GO:0035428,NA	PF00083.24:Sugar (and other) transporter
gene-LOC110092216	104	140	131	97	117	111	NW_021319862.1	684941	694895	+	LOC110092216	--	K01180 endo-1,3(4)-beta-glucanase [EC:3.2.1.6] | (RefSeq) uncharacterized protein LOC111487562 (A)	--	inactive protein kinase SELMODRAFT_444075-like isoform X1 [Dendrobium catenatum]	RecName: Full=Proline-rich receptor-like protein kinase PERK9; EC=2.7.11.1; AltName: Full=Proline-rich extensin-like receptor kinase 9; Short=AtPERK9;	SubName: Full=Inactive protein kinase {ECO:0000313|EMBL:PKU67065.1};	Serine/threonine protein kinase	GO:0016021,integral component of membrane; GO:0005886,plasma membrane; GO:0005524,ATP binding; GO:0019901,protein kinase binding; GO:0004675,transmembrane receptor protein serine/threonine kinase activity; GO:0007166,cell surface receptor signaling pathway; GO:0006468,protein phosphorylation	PF00069.25:Protein kinase domain
gene-LOC110092217	1567	1567	1845	11387	11617	11430	NW_021319750.1	216718	221380	-	LOC110092217	--	K05350 beta-glucosidase [EC:3.2.1.21] | (RefSeq) beta-glucosidase 1-like (A)	ko00460: Cyanoamino acid metabolism; ko00500: Starch and sucrose metabolism; ko00940: Phenylpropanoid biosynthesis	beta-glucosidase 1-like [Dendrobium catenatum]	RecName: Full=Beta-glucosidase 1; Short=Os1bglu1; EC=3.2.1.21; Flags: Precursor;	SubName: Full=Beta-glucosidase 1 {ECO:0000313|EMBL:PKU68257.1};	Beta-glucosidase, lactase phlorizinhydrolase, and related proteins	GO:0008422,beta-glucosidase activity; GO:0102483,scopolin beta-glucosidase activity; GO:0005975,carbohydrate metabolic process; GO:1901657,glycosyl compound metabolic process	PF00232.18:Glycosyl hydrolase family 1
gene-LOC110092218	174	255	199	519	413	709	NW_021319750.1	7625	18617	+	LOC110092218	--	K21232 molybdopterin synthase sulfur carrier subunit | (RefSeq) molybdopterin synthase sulfur carrier subunit isoform X1 (A)	ko04122: Sulfur relay system	molybdopterin synthase sulfur carrier subunit isoform X1 [Dendrobium catenatum]	RecName: Full=Molybdopterin synthase sulfur carrier subunit {ECO:0000255|HAMAP-Rule:MF_03051}; AltName: Full=Molybdenum cofactor synthesis protein 2 small subunit {ECO:0000255|HAMAP-Rule:MF_03051}; AltName: Full=Molybdenum cofactor synthesis protein 2A {ECO:0000255|HAMAP-Rule:MF_03051}; Short=MOCS2A {ECO:0000255|HAMAP-Rule:MF_03051}; AltName: Full=Protein viviparous15; AltName: Full=Sulfur carrie…	SubName: Full=Molybdopterin synthase sulfur carrier subunit {ECO:0000313|EMBL:PKU68250.1};	Molybdopterin converting factor, small subunit	GO:0005829,cytosol; GO:0000166,nucleotide binding; GO:0006777,Mo-molybdopterin cofactor biosynthetic process	PF02597.20:ThiS family
gene-LOC110092219	17	20	9	7	12	6	NW_021319750.1	337842	340607	+	LOC110092219	--	K01179 endoglucanase [EC:3.2.1.4] | (RefSeq) endoglucanase 19-like (A)	ko00500: Starch and sucrose metabolism	endoglucanase 22-like [Dendrobium catenatum]	RecName: Full=Endoglucanase 11; EC=3.2.1.4; AltName: Full=Endo-1,4-beta glucanase 11; Flags: Precursor;	SubName: Full=Endoglucanase 11 {ECO:0000313|EMBL:PKU68264.1};	--	GO:0005576,extracellular region; GO:0008810,cellulase activity; GO:0071555,cell wall organization; GO:0030245,cellulose catabolic process	PF00759.19:Glycosyl hydrolase family 9
gene-LOC110092220	2737	2173	3070	2331	3046	2268	NW_021319750.1	552060	566657	-	LOC110092220	--	K01595 phosphoenolpyruvate carboxylase [EC:4.1.1.31] | (RefSeq) phosphoenolpyruvate carboxylase 2 (A)	ko00620: Pyruvate metabolism; ko00710: Carbon fixation in photosynthetic organisms; ko01200: Carbon metabolism	phosphoenolpyruvate carboxylase 2 [Dendrobium catenatum]	RecName: Full=Phosphoenolpyruvate carboxylase 2; Short=PEPC 2; Short=PEPCase 2; Short=ppcC; EC=4.1.1.31;	SubName: Full=Phosphoenolpyruvate carboxylase 2 {ECO:0000313|EMBL:PKU68271.1};	--	GO:0005737,cytoplasm; GO:0008964,phosphoenolpyruvate carboxylase activity; GO:0015977,carbon fixation; GO:0006099,tricarboxylic acid cycle	PF00311.17:Phosphoenolpyruvate carboxylase
gene-LOC110092221	2600	2520	3531	2053	2904	1239	NW_021319750.1	80203	88094	-	LOC110092221	--	K20784 arabinosyltransferase [EC:2.4.2.-] | (RefSeq) hypothetical protein (A)	ko00514: Other types of O-glycan biosynthesis	fruit protein pKIWI502 [Dendrobium catenatum]	RecName: Full=Fruit protein pKIWI502;	SubName: Full=fruit protein pKIWI502 isoform X1 {ECO:0000313|RefSeq:XP_008811787.1};	--	GO:0016491,oxidoreductase activity	PF00175.21:Oxidoreductase NAD-binding domain
gene-LOC110092222	271	323	231	282	454	518	NW_021319750.1	513494	522775	+	LOC110092222	--	K12831 splicing factor 3B subunit 4 | (RefSeq) hypothetical protein (A)	ko03040: Spliceosome	polyadenylate-binding protein-interacting protein 9-like [Dendrobium catenatum]	RecName: Full=Polyadenylate-binding protein-interacting protein 9; Short=PABP-interacting protein 9; Short=Poly(A)-binding protein-interacting protein 9; AltName: Full=PAM2-containing protein CID9; AltName: Full=Protein CTC-INTERACTING DOMAIN 9;	SubName: Full=Putative polyadenylate-binding protein {ECO:0000313|EMBL:PKU68270.1};	FOG: RRM domain	GO:0005634,nucleus; GO:0003723,RNA binding	PF00076.22:RNA recognition motif. (a.k.a. RRM, RBD, or RNP domain)
gene-LOC110092223	137	191	230	146	219	120	NW_021319750.1	147362	193788	+	LOC110092223	--	--	--	PI-PLC X domain-containing protein At5g67130 isoform X3 [Dendrobium catenatum]	RecName: Full=PI-PLC X domain-containing protein At5g67130; Flags: Precursor;	SubName: Full=PI-PLC X domain-containing protein {ECO:0000313|EMBL:PKU68255.1};	--	GO:0046658,anchored component of plasma membrane; GO:0005886,plasma membrane; GO:0008081,phosphoric diester hydrolase activity; GO:0006629,lipid metabolic process	PF09478.10:Carbohydrate binding domain CBM49
gene-LOC110092224	778	760	671	684	1415	1834	--	--	--	--	--	--	--	--
gene-LOC110092225	223	305	285	558	620	888	NW_021319750.1	194560	210931	-	LOC110092225	--	K11344 chromatin modification-related protein EAF6 | (RefSeq) chromatin modification-related protein MEAF6 isoform X1 (A)	--	chromatin modification-related protein MEAF6 isoform X1 [Dendrobium catenatum]	--	SubName: Full=Uncharacterized protein {ECO:0000313|EMBL:PKU68256.1};	Uncharacterized conserved protein	--	PF09340.10:Histone acetyltransferase subunit NuA4
gene-LOC110092227	606	618	843	821	1065	787	NW_021320146.1	263287	282426	-	LOC110092227	--	K13346 peroxin-10 | (RefSeq) peroxisome biogenesis factor 10 (A)	ko04146: Peroxisome	peroxisome biogenesis factor 10 [Dendrobium catenatum]	RecName: Full=Peroxisome biogenesis factor 10; AltName: Full=PER10; AltName: Full=Peroxin-10; AltName: Full=Peroxisomal biogenesis factor 10; Short=AtPEX10; Short=AthPEX10; AltName: Full=Peroxisome assembly protein 10; AltName: Full=Pex10p;	SubName: Full=Peroxisome biogenesis factor 10 {ECO:0000313|EMBL:PKU63241.1};	Predicted E3 ubiquitin ligase, integral peroxisomal membrane protein	GO:0005829,cytosol; GO:0005779,integral component of peroxisomal membrane; GO:0005778,peroxisomal membrane; GO:0005777,peroxisome; GO:0004842,ubiquitin-protein transferase activity; GO:0008270,zinc ion binding; GO:0009793,embryo development ending in seed dormancy; GO:0006635,fatty acid beta-oxidation; GO:0007031,peroxisome organization; GO:0010381,peroxisome-chloroplast membrane tethering; GO:00…	PF04757.14:Pex2 / Pex12 amino terminal region
gene-LOC110092228	2303	2640	2422	2406	3308	2712	NW_021319862.1	707889	713883	-	LOC110092228	--	K13199 plasminogen activator inhibitor 1 RNA-binding protein | (RefSeq) RGG repeats nuclear RNA binding protein A-like (A)	--	RGG repeats nuclear RNA binding protein A-like [Dendrobium catenatum]	RecName: Full=RGG repeats nuclear RNA binding protein A {ECO:0000303|PubMed:11905967}; Flags: Fragment;	SubName: Full=Uncharacterized protein {ECO:0000313|EMBL:PKU67066.1};	Predicted RNA-binding protein	GO:0005634,nucleus; GO:0048471,perinuclear region of cytoplasm; GO:0003723,RNA binding; GO:0009416,response to light stimulus	PF04774.15:Hyaluronan / mRNA binding family
gene-LOC110092230	167	217	178	238	380	222	NW_021319750.1	465929	480673	+	LOC110092230	--	K14512 mitogen-activated protein kinase 6 [EC:2.7.11.24] | (RefSeq) mitogen-activated protein kinase 1-like (A)	ko04016: MAPK signaling pathway - plant; ko04075: Plant hormone signal transduction; ko04626: Plant-pathogen interaction	mitogen-activated protein kinase 1-like [Dendrobium catenatum]	RecName: Full=Mitogen-activated protein kinase 1; Short=MAP kinase 1; EC=2.7.11.24; AltName: Full=MAP kinase 6; AltName: Full=OsMAPK6; AltName: Full=OsSIPK;	SubName: Full=Mitogen-activated protein kinase like MMK1 {ECO:0000313|EMBL:PKU82321.1};	Mitogen-activated protein kinase	GO:0005737,cytoplasm; GO:0005634,nucleus; GO:0009524,phragmoplast; GO:0009574,preprophase band; GO:0005802,trans-Golgi network; GO:0005524,ATP binding; GO:0004707,MAP kinase activity; GO:0010120,camalexin biosynthetic process; GO:0051301,cell division; GO:0009864,induced systemic resistance, jasmonic acid mediated signaling pathway; GO:0010229,inflorescence development; GO:0010150,leaf senescence…	PF00069.25:Protein kinase domain
gene-LOC110092232	4322	3400	5385	1622	2705	1381	NW_021319750.1	88690	111498	-	LOC110092232	--	K17710 pentatricopeptide repeat domain-containing protein 1 | (RefSeq) putative pentatricopeptide repeat-containing protein At2g02150 (A)	--	pentatricopeptide repeat-containing protein At2g31400, chloroplastic [Dendrobium catenatum]	RecName: Full=Pentatricopeptide repeat-containing protein At2g31400, chloroplastic; Flags: Precursor;	SubName: Full=Pentatricopeptide repeat-containing protein {ECO:0000313|EMBL:PKU68253.1};	FOG: PPR repeat	GO:0009507,chloroplast; GO:0003677,DNA binding; GO:0004519,endonuclease activity; GO:0003723,RNA binding; GO:0010019,chloroplast-nucleus signaling pathway; GO:0031930,mitochondria-nucleus signaling pathway; GO:0009451,RNA modification	PF13041.6:PPR repeat family
gene-LOC110092233	1351	1245	1593	1432	1805	631	NW_021319178.1	14076349	14088066	-	LOC110092233	--	K13832 3-dehydroquinate dehydratase / shikimate dehydrogenase [EC:4.2.1.10 1.1.1.25] | (RefSeq) bifunctional 3-dehydroquinate dehydratase/shikimate dehydrogenase, chloroplastic-like isoform X1 (A)	ko00400: Phenylalanine, tyrosine and tryptophan biosynthesis; ko01230: Biosynthesis of amino acids	zinc finger CCCH domain-containing protein 8-like isoform X1 [Dendrobium catenatum]	RecName: Full=Zinc finger CCCH domain-containing protein 37; Short=AtC3H37; AltName: Full=ENHANCER OF AG-4 protein 1;	SubName: Full=Zinc finger CCCH domain-containing protein 37 {ECO:0000313|EMBL:PKU76737.1};	CCCH-type Zn-finger protein	GO:0005829,cytosol; GO:0016607,nuclear speck; GO:0005634,nucleus; GO:0003677,DNA binding; GO:0046872,metal ion binding; GO:0003730,mRNA 3'-UTR binding; GO:0003723,RNA binding; GO:0061158,3'-UTR-mediated mRNA destabilization; GO:0001709,cell fate determination; GO:0009908,flower development; GO:0006397,mRNA processing	PF00642.24:Zinc finger C-x8-C-x5-C-x3-H type (and similar)
gene-LOC110092234	594	714	786	1160	1704	1704	NW_021319178.1	14060747	14075241	+	LOC110092234	--	K00031 isocitrate dehydrogenase [EC:1.1.1.42] | (RefSeq) cytosolic isocitrate dehydrogenase [NADP] (A)	ko00020: Citrate cycle (TCA cycle); ko00480: Glutathione metabolism; ko01200: Carbon metabolism; ko01210: 2-Oxocarboxylic acid metabolism; ko01230: Biosynthesis of amino acids; ko04146: Peroxisome	cytosolic isocitrate dehydrogenase [NADP]	RecName: Full=Cytosolic isocitrate dehydrogenase [NADP]; EC=1.1.1.42;	SubName: Full=Cytosolic isocitrate dehydrogenase [NADP] {ECO:0000313|EMBL:PKU76736.1};	NADP-dependent isocitrate dehydrogenase	GO:0048046,apoplast; GO:0009570,chloroplast stroma; GO:0005829,cytosol; GO:0005886,plasma membrane; GO:0009506,plasmodesma; GO:0005507,copper ion binding; GO:0004450,isocitrate dehydrogenase (NADP+) activity; GO:0000287,magnesium ion binding; GO:0051287,NAD binding; GO:0042742,defense response to bacterium; GO:0006102,isocitrate metabolic process; GO:0006739,NADP metabolic process; GO:0046686,res…	PF00180.20:Isocitrate/isopropylmalate dehydrogenase
gene-LOC110092235	230	396	244	348	499	782	NW_021319178.1	14209837	14213769	+	LOC110092235	--	K02995 small subunit ribosomal protein S8e | (RefSeq) 40S ribosomal protein S8-like (A)	ko03010: Ribosome	40S ribosomal protein S8-like [Dendrobium catenatum]	RecName: Full=40S ribosomal protein S8;	SubName: Full=40S ribosomal protein S8 {ECO:0000313|EMBL:PKU76742.1};	40S ribosomal protein S8	GO:0043253,chloroplast ribosome; GO:0003735,structural constituent of ribosome; GO:0042255,ribosome assembly; GO:0006412,translation	PF01201.22:Ribosomal protein S8e
gene-LOC110092236	171	235	227	234	247	177	NW_021319178.1	14162259	14175494	+	LOC110092236	--	K14784 protein CMS1 | (RefSeq) uncharacterized protein C3orf26 homolog (A)	--	protein CMSS1 [Dendrobium catenatum]	--	SubName: Full=Uncharacterized protein {ECO:0000313|EMBL:PKU76740.1};	Predicted DEAD-box-containing helicase	--	PF14617.6:U3-containing 90S pre-ribosomal complex subunit
gene-LOC110092237	39	36	44	64	35	15	NW_021319178.1	14261423	14271813	-	LOC110092237	--	--	--	protein PRD1 [Dendrobium catenatum]	RecName: Full=Protein PRD1; Short=AtPRD1; AltName: Full=Protein PUTATIVE RECOMBINATION INITIATION DEFECT 1;	SubName: Full=Protein PRD1 {ECO:0000313|EMBL:PKU76745.1};	--	GO:0005634,nucleus; GO:0003677,DNA binding; GO:0016787,hydrolase activity; GO:0051321,meiotic cell cycle	--
gene-LOC110092238	115	132	128	103	129	94	NW_021319862.1	790095	825556	-	LOC110092238	--	K22762 desumoylating isopeptidase 1 [EC:3.4.-.-] | (RefSeq) desumoylating isopeptidase 1-like (A)	--	deSI-like protein At4g17486 isoform X2 [Dendrobium catenatum]	RecName: Full=DeSI-like protein At4g17486; EC=3.4.-.-;	SubName: Full=DeSI-like protein {ECO:0000313|EMBL:PKU67069.1};	Uncharacterized conserved protein	GO:0008233,peptidase activity	PF05903.14:PPPDE putative peptidase domain
gene-LOC110092239	1243	1169	1616	1331	1621	2085	NW_021319178.1	14179141	14207985	+	LOC110092239	--	K09597 signal peptide peptidase-like 2B [EC:3.4.23.-] | (RefSeq) signal peptide peptidase-like 2 (A)	--	signal peptide peptidase-like 2 [Dendrobium catenatum]	RecName: Full=Signal peptide peptidase-like 2; Short=OsSPPL2; EC=3.4.23.-; Flags: Precursor;	SubName: Full=Signal peptide peptidase-like 2 {ECO:0000313|EMBL:PKA49663.1}; EC=3.4.23.- {ECO:0000313|EMBL:PKA49663.1};	Uncharacterized conserved protein, contains PA domain	GO:0010008,endosome membrane; GO:0030660,Golgi-associated vesicle membrane; GO:0071458,integral component of cytoplasmic side of endoplasmic reticulum membrane; GO:0071556,integral component of lumenal side of endoplasmic reticulum membrane; GO:0005765,lysosomal membrane; GO:0004190,aspartic-type endopeptidase activity	PF04258.13:Signal peptide peptidase
gene-LOC110092240	280	297	343	401	433	405	NW_021319178.1	14225939	14235708	-	LOC110092240	--	--	--	uncharacterized protein LOC110092240 [Dendrobium catenatum]	--	SubName: Full=Uncharacterized protein {ECO:0000313|EMBL:PKU76743.1};	--	--	--
gene-LOC110092241	746	703	874	699	980	781	NW_021319178.1	14237490	14260274	+	LOC110092241	--	K12862 pleiotropic regulator 1 | (RefSeq) protein pleiotropic regulatory locus 1 (A)	ko03040: Spliceosome	protein pleiotropic regulatory locus 1 isoform X2 [Dendrobium catenatum]	RecName: Full=Protein pleiotropic regulatory locus 1; Short=Protein PRL1; AltName: Full=MOS4-associated complex protein 2; Short=MAC protein 2;	SubName: Full=Protein pleiotropic regulatory locus 1 {ECO:0000313|EMBL:PKA61035.1};	Pleiotropic regulator 1	GO:0071013,catalytic step 2 spliceosome; GO:0080008,Cul4-RING E3 ubiquitin ligase complex; GO:0005634,nucleus; GO:0071011,precatalytic spliceosome; GO:0000974,Prp19 complex; GO:0048825,cotyledon development; GO:0009870,defense response signaling pathway, resistance gene-dependent; GO:0010204,defense response signaling pathway, resistance gene-independent; GO:0042742,defense response to bacterium;…	PF00400.32:WD domain, G-beta repeat
gene-LOC110092242	119	141	145	233	288	193	NW_021319178.1	14092725	14100946	-	LOC110092242	--	K01937 CTP synthase [EC:6.3.4.2] | (RefSeq) CTP synthase-like (A)	ko00240: Pyrimidine metabolism	CTP synthase-like [Dendrobium catenatum]	--	SubName: Full=CTP synthase {ECO:0000313|EMBL:PKU76738.1};	CTP synthase (UTP-ammonia lyase)	--	PF06418.14:CTP synthase N-terminus
gene-LOC110092243	199	300	249	409	452	428	NW_021319178.1	14134667	14150183	+	LOC110092243	--	K13096 splicing factor 4 | (RefSeq) SURP and G-patch domain-containing protein 1-like protein (A)	--	G patch domain-containing protein 8 isoform X1 [Dendrobium catenatum]	RecName: Full=Septin and tuftelin-interacting protein 1 homolog 2; AltName: Full=Protein SPLICEOSOMAL TIMEKEEPER LOCUS 2;	SubName: Full=SURP and G-patch domain-containing protein 1-like protein {ECO:0000313|EMBL:PKU76739.1};	Tuftelin-interacting protein TIP39, contains G-patch domain	GO:0071008,U2-type post-mRNA release spliceosomal complex; GO:0003677,DNA binding; GO:0006355,regulation of transcription, DNA-templated; GO:0000390,spliceosomal complex disassembly	PF01585.23:G-patch domain
gene-LOC110092244	2858	2378	3155	1811	2529	1059	NW_021319178.1	14043792	14052180	+	LOC110092244	--	K14491 two-component response regulator ARR-B family | (RefSeq) two-component response regulator ORR23 (A)	ko04075: Plant hormone signal transduction	probable transcription factor GLK1 [Dendrobium catenatum]	RecName: Full=Transcription activator GLK1; AltName: Full=GBF'S PRO-RICH REGION-INTERACTING factor 1; AltName: Full=Golden2-like protein 1; Short=AtGLK1;	SubName: Full=Putative transcription factor GLK1 {ECO:0000313|EMBL:PKU76735.1};	--	GO:0005634,nucleus; GO:0003677,DNA binding; GO:1900056,negative regulation of leaf senescence; GO:0006355,regulation of transcription, DNA-templated; GO:0006351,transcription, DNA-templated	PF00249.31:Myb-like DNA-binding domain
gene-LOC110092245	70	46	63	28	19	21	NW_021319178.1	14276198	14303317	+	LOC110092245	--	K00924 kinase [EC:2.7.1.-] | (RefSeq) receptor protein kinase TMK1-like (A)	--	receptor-like kinase TMK4 [Dendrobium catenatum]	RecName: Full=Receptor-like kinase TMK3 {ECO:0000303|PubMed:23613767}; EC=2.7.11.1 {ECO:0000305}; AltName: Full=BARK1-like kinase 2 {ECO:0000303|PubMed:23921992}; AltName: Full=Leucine-rich repeat receptor-like kinases TMK3 {ECO:0000303|PubMed:23613767}; AltName: Full=Transmembrane kinase 3 {ECO:0000303|PubMed:23613767}; Flags: Precursor;	SubName: Full=Putative receptor protein kinase TMK1 {ECO:0000313|EMBL:PKU76746.1};	--	GO:0016021,integral component of membrane; GO:0009505,plant-type cell wall; GO:0005886,plasma membrane; GO:0009506,plasmodesma; GO:0005524,ATP binding; GO:0004675,transmembrane receptor protein serine/threonine kinase activity; GO:0007166,cell surface receptor signaling pathway; GO:0009555,pollen development; GO:0006468,protein phosphorylation	PF00069.25:Protein kinase domain
gene-LOC110092246	1058	1173	1574	1305	1695	781	NW_021410695.1	6394	34029	-	LOC110092246	--	K01513 ectonucleotide pyrophosphatase/phosphodiesterase family member 1/3 [EC:3.1.4.1 3.6.1.9] | (RefSeq) uncharacterized protein LOC109769794 (A)	ko00230: Purine metabolism; ko00240: Pyrimidine metabolism; ko00500: Starch and sucrose metabolism; ko00740: Riboflavin metabolism; ko00760: Nicotinate and nicotinamide metabolism; ko00770: Pantothenate and CoA biosynthesis	uncharacterized protein LOC110092246 [Dendrobium catenatum]	--	SubName: Full=uncharacterized protein LOC103702959 isoform X3 {ECO:0000313|RefSeq:XP_017697287.1};	--	--	PF09713.10:Plant protein 1589 of unknown function (A_thal_3526)
gene-LOC110092248	2	0	0	0	0	0	NW_021410695.1	101948	102274	-	LOC110092248	--	K01537 Ca2+-transporting ATPase [EC:3.6.3.8] | (RefSeq) calcium-transporting ATPase 1, plasma membrane-type-like (A)	--	uncharacterized protein LOC110092248 [Dendrobium catenatum]	RecName: Full=Uncharacterized mitochondrial protein AtMg00820; AltName: Full=ORF170;	SubName: Full=Retrovirus-related Pol polyprotein from transposon TNT 1-94 {ECO:0000313|EMBL:PKU70208.1};	FOG: Transposon-encoded proteins with TYA, reverse transcriptase, integrase domains in various combinations	GO:0005739,mitochondrion	PF07727.14:Reverse transcriptase (RNA-dependent DNA polymerase)
gene-LOC110092250	57	89	50	91	137	162	NW_021319550.1	686020	689284	-	LOC110092250	--	K15171 transcription elongation factor SPT4 | (RefSeq) transcription elongation factor SPT4 homolog 2-like (A)	--	transcription elongation factor SPT4 homolog 2-like [Dendrobium catenatum]	RecName: Full=Transcription elongation factor SPT4 homolog 2;	SubName: Full=Transcription elongation factor SPT4 like 2 {ECO:0000313|EMBL:PKU70898.1};	Transcription elongation factor SPT4	GO:0032044,DSIF complex; GO:0003700,DNA-binding transcription factor activity; GO:0000993,RNA polymerase II complex binding; GO:0003727,single-stranded RNA binding; GO:0008270,zinc ion binding; GO:0006325,chromatin organization; GO:0006397,mRNA processing; GO:0032786,positive regulation of DNA-templated transcription, elongation; GO:0034243,regulation of transcription elongation from RNA polymera…	PF06093.13:Spt4/RpoE2 zinc finger
gene-LOC110092251	91	90	84	83	63	39	NW_021319550.1	580433	583555	-	LOC110092251	--	K19750 dynein assembly factor 1, axonemal | (RefSeq) dynein assembly factor 1, axonemal homolog isoform X1 (A)	--	uncharacterized protein LOC110092251 isoform X1 [Dendrobium catenatum]	RecName: Full=187-kDa microtubule-associated protein AIR9 {ECO:0000303|PubMed:17027491}; AltName: Full=Auxin-induced in root cultures protein 9;	SubName: Full=Putative disease resistance protein {ECO:0000313|EMBL:PKU70892.1};	Protein phosphatase 1, regulatory subunit, and related proteins	GO:0055028,cortical microtubule; GO:0009524,phragmoplast; GO:0005886,plasma membrane; GO:0009506,plasmodesma; GO:0009574,preprophase band; GO:0007049,cell cycle; GO:0051301,cell division; GO:0010102,lateral root morphogenesis; GO:0009733,response to auxin	PF13855.6:Leucine rich repeat
gene-LOC110092252	20	27	30	70	98	30	NW_021319862.1	754733	760299	-	LOC110092252	--	--	--	NAC domain-containing protein 10-like [Dendrobium catenatum]	RecName: Full=NAC domain-containing protein 75 {ECO:0000303|PubMed:15029955}; Short=ANAC075 {ECO:0000303|PubMed:15029955};	SubName: Full=NAC domain-containing protein 8 {ECO:0000313|EMBL:PKU67067.1};	--	GO:0005634,nucleus; GO:0003700,DNA-binding transcription factor activity; GO:0044212,transcription regulatory region DNA binding; GO:0071555,cell wall organization; GO:0007275,multicellular organism development; GO:0045893,positive regulation of transcription, DNA-templated; GO:1905177,tracheary element differentiation; GO:0006351,transcription, DNA-templated	PF02365.15:No apical meristem (NAM) protein
gene-LOC110092253	270	287	332	235	282	211	NW_021319550.1	638964	665342	-	LOC110092253	--	K21596 calmodulin-binding transcription activator | (RefSeq) calmodulin-binding transcription activator 3-like isoform X1 (A)	--	calmodulin-binding transcription activator 3-like isoform X1 [Dendrobium catenatum]	RecName: Full=Calmodulin-binding transcription activator 1 {ECO:0000303|PubMed:11925432}; Short=AtCAMTA1 {ECO:0000303|PubMed:11925432}; AltName: Full=Ethylene-induced calmodulin-binding protein b {ECO:0000303|PubMed:11782485}; Short=EICBP.b {ECO:0000303|PubMed:11782485}; AltName: Full=Signal-responsive protein 2 {ECO:0000303|PubMed:12218065}; Short=AtSR2 {ECO:0000303|PubMed:12218065};	SubName: Full=Calmodulin-binding transcription activator 2 {ECO:0000313|EMBL:PKU70895.1};	Uncharacterized conserved protein, contains IPT/TIG domain	GO:0005634,nucleus; GO:0005516,calmodulin binding; GO:0043565,sequence-specific DNA binding; GO:0001077,proximal promoter DNA-binding transcription activator activity, RNA polymerase II-specific; GO:0045944,positive regulation of transcription by RNA polymerase II; GO:0045893,positive regulation of transcription, DNA-templated; GO:0009733,response to auxin; GO:0050826,response to freezing; GO:000…	PF03859.16:CG-1 domain
gene-LOC110092254	387	341	430	384	452	480	NW_021319550.1	600072	636584	-	LOC110092254	--	--	--	uncharacterized protein LOC110092254 isoform X2 [Dendrobium catenatum]	--	SubName: Full=Uncharacterized protein {ECO:0000313|EMBL:PKU70894.1};	Uncharacterized conserved protein	--	PF15982.5:N-terminal cysteine-rich region of Transmembrane protein 135
gene-LOC110092255	354	416	383	328	410	404	NW_021319550.1	589338	598830	-	LOC110092255	--	K17506 protein phosphatase 1L [EC:3.1.3.16] | (RefSeq) probable protein phosphatase 2C 41 (A)	--	probable protein phosphatase 2C 41 [Dendrobium catenatum]	RecName: Full=Probable protein phosphatase 2C 41; Short=OsPP2C41; EC=3.1.3.16;	SubName: Full=Uncharacterized protein {ECO:0000313|EMBL:PKU70893.1};	Serine/threonine protein phosphatase	GO:0046872,metal ion binding; GO:0004722,protein serine/threonine phosphatase activity	PF00481.21:Protein phosphatase 2C
gene-LOC110092256	2835	2830	3316	1803	2582	2361	NW_021319550.1	738210	762744	+	LOC110092256	--	K11262 acetyl-CoA carboxylase / biotin carboxylase 1 [EC:6.4.1.2 6.3.4.14 2.1.3.15] | (RefSeq) acetyl-CoA carboxylase 1-like (A)	ko00061: Fatty acid biosynthesis; ko00254: Aflatoxin biosynthesis; ko00620: Pyruvate metabolism; ko00640: Propanoate metabolism; ko01212: Fatty acid metabolism	acetyl-CoA carboxylase 1-like [Dendrobium catenatum]	RecName: Full=Acetyl-CoA carboxylase 1; EC=6.4.1.2; Includes: RecName: Full=Biotin carboxylase; EC=6.3.4.14;	SubName: Full=Acetyl-CoA carboxylase 1 {ECO:0000313|EMBL:PKU70902.1};	Acetyl-CoA carboxylase	GO:0005829,cytosol; GO:0003989,acetyl-CoA carboxylase activity; GO:0005524,ATP binding; GO:0004075,biotin carboxylase activity; GO:0046872,metal ion binding; GO:0006633,fatty acid biosynthetic process; GO:2001295,malonyl-CoA biosynthetic process	PF08326.12:Acetyl-CoA carboxylase, central region
gene-LOC110092257	1285	1592	1362	1843	2192	1927	NW_021319550.1	669957	674868	-	LOC110092257	--	K12891 splicing factor, arginine/serine-rich 2 | (RefSeq) serine/arginine-rich splicing factor SC35 (A)	ko03040: Spliceosome	serine/arginine-rich splicing factor SC35 [Dendrobium catenatum]	RecName: Full=Serine/arginine-rich splicing factor SC35; Short=At-SC35; Short=AtSC35; AltName: Full=SC35-like splicing factor;	SubName: Full=Zinc finger CCCH domain-containing protein 25 {ECO:0000313|EMBL:PKU70896.1};	Predicted splicing factor, SR protein superfamily	GO:0005829,cytosol; GO:0016020,membrane; GO:0016607,nuclear speck; GO:0005681,spliceosomal complex; GO:0003729,mRNA binding; GO:0000398,mRNA splicing, via spliceosome; GO:0008380,RNA splicing	PF00076.22:RNA recognition motif. (a.k.a. RRM, RBD, or RNP domain)
gene-LOC110092258	105	124	126	145	229	336	NW_021319550.1	708342	711481	+	LOC110092258	--	--	--	uncharacterized protein LOC110092258 [Dendrobium catenatum]	RecName: Full=Protein MARD1 {ECO:0000303|PubMed:15159630}; AltName: Full=Mediator of ABA-regulated dormancy1 {ECO:0000303|PubMed:15159630}; AltName: Full=Senescence-associated protein SAG102 {ECO:0000303|PubMed:11402199};	SubName: Full=Uncharacterized protein {ECO:0000313|EMBL:PKU70900.1};	--	GO:0010494,cytoplasmic stress granule; GO:0000932,P-body; GO:0046872,metal ion binding; GO:0009737,response to abscisic acid; GO:0010162,seed dormancy process	PF04570.14:zinc-finger of the FCS-type, C2-C2
gene-LOC110092259	5	3	4	3	0	3	NW_021319550.1	792460	793373	-	LOC110092259	--	K07213 copper chaperone | (RefSeq) copper transport protein ATX1 (A)	--	heavy metal-associated isoprenylated plant protein 23-like [Dendrobium catenatum]	RecName: Full=Heavy metal-associated isoprenylated plant protein 20 {ECO:0000303|PubMed:21072340, ECO:0000303|PubMed:23368984}; Short=AtHIP20 {ECO:0000303|PubMed:23368984}; Short=AtHIPP20 {ECO:0000303|PubMed:21072340}; Flags: Precursor;	SubName: Full=Heavy metal-associated isoprenylated plant protein 26 {ECO:0000313|EMBL:PKU70904.1};	Copper chaperone	GO:0005737,cytoplasm; GO:0016020,membrane; GO:0046914,transition metal ion binding; GO:0055073,cadmium ion homeostasis; GO:0046916,cellular transition metal ion homeostasis; GO:0071585,detoxification of cadmium ion; GO:0030001,metal ion transport	PF00403.26:Heavy-metal-associated domain
gene-LOC110092260	618	508	727	812	1045	419	NW_021319550.1	718239	728302	+	LOC110092260	--	--	--	TSL-kinase interacting protein 1-like isoform X4 [Dendrobium catenatum]	RecName: Full=TSL-kinase interacting protein 1; AltName: Full=Myb-related protein TKI1;	SubName: Full=TSL-kinase interacting protein 1 {ECO:0000313|EMBL:PKU70901.1};	Polycomb-group transcriptional regulator	GO:0005634,nucleus; GO:0003682,chromatin binding; GO:0003677,DNA binding; GO:0006355,regulation of transcription, DNA-templated; GO:0006351,transcription, DNA-templated	--
gene-LOC110092261	245	275	352	997	917	683	NW_021319550.1	773467	777921	-	LOC110092261	--	K17470 sulfate transporter 1, high-affinity | (RefSeq) sulfate transporter 1.2-like (A)	--	sulfate transporter 1.2-like [Dendrobium catenatum]	RecName: Full=Sulfate transporter 1.3;	SubName: Full=Sulfate transporter 1.2 {ECO:0000313|EMBL:PKU70903.1};	Sulfate/bicarbonate/oxalate exchanger SAT-1 and related transporters (SLC26 family)	GO:0005887,integral component of plasma membrane; GO:0008271,secondary active sulfate transmembrane transporter activity; GO:0015116,sulfate transmembrane transporter activity; GO:0015293,symporter activity	PF00916.20:Sulfate permease family
gene-LOC110092262	0	2	4	0	0	0	NW_021319862.1	603592	617602	+	LOC110092262	--	K19027 zinc finger FYVE domain-containing protein 26 | (RefSeq) hypothetical protein (A)	--	dirigent protein 6-like [Dendrobium catenatum]	RecName: Full=Dirigent protein 6; Short=AtDIR6; Flags: Precursor;	SubName: Full=Disease resistance response protein 206 {ECO:0000313|EMBL:PKU67061.1};	--	GO:0048046,apoplast; GO:0042349,guiding stereospecific synthesis activity; GO:0042802,identical protein binding; GO:0016853,isomerase activity; GO:0042803,protein homodimerization activity; GO:1901599,(-)-pinoresinol biosynthetic process; GO:0050790,regulation of catalytic activity	PF03018.14:Dirigent-like protein
gene-LOC110092263	1	0	0	0	0	0	NW_021319550.1	695696	698080	-	LOC110092263	--	--	--	protein UPSTREAM OF FLC-like [Dendrobium catenatum]	RecName: Full=Protein UPSTREAM OF FLC;	SubName: Full=Uncharacterized protein {ECO:0000313|EMBL:PKU70899.1};	--	--	PF06136.13:Domain of unknown function (DUF966)
gene-LOC110092264	334	306	342	156	304	272	NW_021319550.1	575724	577500	-	LOC110092264	--	K21374 7-deoxyloganetin glucosyltransferase [EC:2.4.1.324] | (RefSeq) UDP-glycosyltransferase 85A2-like (A)	ko00902: Monoterpenoid biosynthesis	7-deoxyloganetin glucosyltransferase-like [Dendrobium catenatum]	RecName: Full=7-deoxyloganetin glucosyltransferase; EC=2.4.1.324; AltName: Full=Iridoid 1-O-glucosyltransferase; AltName: Full=UDP-glucose glucosyltransferase 6; Short=CrUGT6; AltName: Full=UDP-glycosyltransferase 85A23;	SubName: Full=UDP-glycosyltransferase 85A2 {ECO:0000313|EMBL:PKU70890.1};	UDP-glucuronosyl and UDP-glucosyl transferase	GO:0035251,UDP-glucosyltransferase activity; GO:1900994,(-)-secologanin biosynthetic process	PF00201.18:UDP-glucoronosyl and UDP-glucosyl transferase
gene-LOC110092265	84	66	79	40	5	54	NW_021319550.1	569330	571678	-	LOC110092265	--	K21374 7-deoxyloganetin glucosyltransferase [EC:2.4.1.324] | (RefSeq) UDP-glycosyltransferase 85A2-like (A)	ko00902: Monoterpenoid biosynthesis	7-deoxyloganetin glucosyltransferase-like isoform X1 [Dendrobium catenatum]	RecName: Full=7-deoxyloganetin glucosyltransferase; EC=2.4.1.324; AltName: Full=Genipin glucosyltransferase; AltName: Full=UDP-glucose glucosyltransferase 2; Short=GjUGT2; AltName: Full=UDP-glycosyltransferase 85A24;	SubName: Full=UDP-glycosyltransferase 85A2 {ECO:0000313|EMBL:PKU70890.1};	UDP-glucuronosyl and UDP-glucosyl transferase	GO:0035251,UDP-glucosyltransferase activity; GO:0008152,metabolic process	PF00201.18:UDP-glucoronosyl and UDP-glucosyl transferase
gene-LOC110092266	0	1	0	5	0	0	NW_021319550.1	543351	547498	+	LOC110092266	--	K21374 7-deoxyloganetin glucosyltransferase [EC:2.4.1.324] | (RefSeq) 7-deoxyloganetin glucosyltransferase-like (A)	ko00902: Monoterpenoid biosynthesis	7-deoxyloganetin glucosyltransferase-like [Dendrobium catenatum]	RecName: Full=7-deoxyloganetin glucosyltransferase; EC=2.4.1.324; AltName: Full=Genipin glucosyltransferase; AltName: Full=UDP-glucose glucosyltransferase 2; Short=GjUGT2; AltName: Full=UDP-glycosyltransferase 85A24;	SubName: Full=UDP-glycosyltransferase 85A2 {ECO:0000313|EMBL:PKU70888.1};	UDP-glucuronosyl and UDP-glucosyl transferase	GO:0035251,UDP-glucosyltransferase activity; GO:0008152,metabolic process	PF00201.18:UDP-glucoronosyl and UDP-glucosyl transferase
gene-LOC110092267	36	39	37	29	34	23	NW_021319550.1	567603	569595	+	LOC110092267	--	K21374 7-deoxyloganetin glucosyltransferase [EC:2.4.1.324] | (RefSeq) 7-deoxyloganetin glucosyltransferase-like (A)	ko00902: Monoterpenoid biosynthesis	7-deoxyloganetin glucosyltransferase-like [Dendrobium catenatum]	RecName: Full=7-deoxyloganetin glucosyltransferase; EC=2.4.1.324; AltName: Full=Genipin glucosyltransferase; AltName: Full=UDP-glucose glucosyltransferase 2; Short=GjUGT2; AltName: Full=UDP-glycosyltransferase 85A24;	SubName: Full=UDP-glycosyltransferase 85A1 {ECO:0000313|EMBL:PKU70889.1};	UDP-glucuronosyl and UDP-glucosyl transferase	GO:0035251,UDP-glucosyltransferase activity; GO:0008152,metabolic process	PF00201.18:UDP-glucoronosyl and UDP-glucosyl transferase
gene-LOC110092268	7	6	18	9	0	2	NW_021319550.1	556995	559807	+	LOC110092268	--	K21374 7-deoxyloganetin glucosyltransferase [EC:2.4.1.324] | (RefSeq) 7-deoxyloganetin glucosyltransferase-like (A)	ko00902: Monoterpenoid biosynthesis	7-deoxyloganetin glucosyltransferase-like [Dendrobium catenatum]	RecName: Full=7-deoxyloganetin glucosyltransferase; EC=2.4.1.324; AltName: Full=Genipin glucosyltransferase; AltName: Full=UDP-glucose glucosyltransferase 2; Short=GjUGT2; AltName: Full=UDP-glycosyltransferase 85A24;	SubName: Full=UDP-glycosyltransferase 85A2 {ECO:0000313|EMBL:PKU70888.1};	UDP-glucuronosyl and UDP-glucosyl transferase	GO:0035251,UDP-glucosyltransferase activity; GO:0008152,metabolic process	PF00201.18:UDP-glucoronosyl and UDP-glucosyl transferase
gene-LOC110092269	11	9	5	28	33	19	NW_021318868.1	255599	258448	-	LOC110092269	--	--	--	--	--	--	--	--	--
gene-LOC110092270	24	30	34	55	75	38	NW_021318868.1	266456	267352	-	LOC110092270	--	--	--	uncharacterized protein LOC110092270 [Dendrobium catenatum]	--	SubName: Full=Uncharacterized protein {ECO:0000313|EMBL:PKU81692.1};	--	--	PF14364.6:Domain of unknown function (DUF4408)
gene-LOC110092271	57	33	68	67	56	61	NW_021319862.1	583959	587969	+	LOC110092271	--	K03695 ATP-dependent Clp protease ATP-binding subunit ClpB | (RefSeq) chaperone protein ClpB1-like (A)	--	aluminum-activated malate transporter 9-like [Dendrobium catenatum]	RecName: Full=Aluminum-activated malate transporter 9; Short=AtALMT9;	SubName: Full=aluminum-activated malate transporter 9-like {ECO:0000313|RefSeq:XP_008805628.1};	Predicted membrane protein	GO:0016021,integral component of membrane; GO:0009705,plant-type vacuole membrane; GO:0005253,anion channel activity; GO:0015140,malate transmembrane transporter activity; GO:0015743,malate transport	PF11744.8:Aluminium activated malate transporter
gene-LOC110092273	100	133	100	134	191	152	NW_021319843.1	924061	937999	+	LOC110092273	--	K00053 ketol-acid reductoisomerase [EC:1.1.1.86] | (RefSeq) ketol-acid reductoisomerase, chloroplastic-like (A)	ko00290: Valine, leucine and isoleucine biosynthesis; ko00770: Pantothenate and CoA biosynthesis; ko01210: 2-Oxocarboxylic acid metabolism; ko01230: Biosynthesis of amino acids	uncharacterized protein LOC110092273 isoform X1 [Dendrobium catenatum]	--	SubName: Full=Uncharacterized protein {ECO:0000313|EMBL:PKA53350.1};	--	--	PF07460.11:NUMOD3 motif (2 copies)
gene-LOC110092274	727	549	829	540	518	280	NW_021319843.1	1017191	1108769	-	LOC110092274	--	K14963 COMPASS component SWD3 | (RefSeq) transcriptional corepressor LEUNIG isoform X2 (A)	--	transcriptional corepressor LEUNIG-like isoform X1 [Dendrobium catenatum]	RecName: Full=Transcriptional corepressor LEUNIG {ECO:0000303|PubMed:11058164}; AltName: Full=Protein ROTUNDA2 {ECO:0000303|PubMed:15208345};	SubName: Full=Transcriptional corepressor LEUNIG {ECO:0000313|EMBL:PKU67380.1};	WD40 repeat-containing protein	GO:0005634,nucleus; GO:0030154,cell differentiation; GO:0006974,cellular response to DNA damage stimulus; GO:0071217,cellular response to external biotic stimulus; GO:0009908,flower development; GO:0010393,galacturonan metabolic process; GO:0010073,meristem maintenance; GO:0080001,mucilage extrusion from seed coat; GO:0048359,mucilage metabolic process involved in seed coat development; GO:004589…	PF00400.32:WD domain, G-beta repeat
gene-LOC110092275	33	25	16	62	64	35	NW_021319843.1	996857	999957	-	LOC110092275	--	K12835 ATP-dependent RNA helicase DDX42 [EC:3.6.4.13] | (RefSeq) DEAD-box ATP-dependent RNA helicase 24 isoform X1 (A)	ko03040: Spliceosome	probable WRKY transcription factor 28 [Dendrobium catenatum]	RecName: Full=Probable WRKY transcription factor 28; AltName: Full=WRKY DNA-binding protein 28;	SubName: Full=Putative WRKY transcription factor 28 {ECO:0000313|EMBL:PKU67379.1};	--	GO:0005634,nucleus; GO:0003700,DNA-binding transcription factor activity; GO:0043565,sequence-specific DNA binding; GO:0006351,transcription, DNA-templated	PF03106.15:WRKY DNA -binding domain
gene-LOC110092276	0	3	0	0	0	0	NW_021319843.1	940652	941233	+	LOC110092276	--	K07517 Delta3-Delta2-enoyl-CoA isomerase [EC:5.3.3.8] | (RefSeq) uncharacterized protein LOC18427060 (A)	ko00071: Fatty acid degradation	L10-interacting MYB domain-containing protein-like [Dendrobium catenatum]	RecName: Full=L10-interacting MYB domain-containing protein {ECO:0000303|PubMed:25707794};	SubName: Full=Uncharacterized protein {ECO:0000313|EMBL:PKU67375.1};	--	GO:0005634,nucleus; GO:0006355,regulation of transcription, DNA-templated; GO:0006351,transcription, DNA-templated	PF12776.7:Myb/SANT-like DNA-binding domain
gene-LOC110092277	6143	5947	6608	4043	5744	5952	NW_021319843.1	942641	954964	+	LOC110092277	--	K00053 ketol-acid reductoisomerase [EC:1.1.1.86] | (RefSeq) ketol-acid reductoisomerase, chloroplastic (A)	ko00290: Valine, leucine and isoleucine biosynthesis; ko00770: Pantothenate and CoA biosynthesis; ko01210: 2-Oxocarboxylic acid metabolism; ko01230: Biosynthesis of amino acids	ketol-acid reductoisomerase, chloroplastic [Dendrobium catenatum]	RecName: Full=Ketol-acid reductoisomerase, chloroplastic; EC=1.1.1.86; AltName: Full=Acetohydroxy-acid reductoisomerase; AltName: Full=Alpha-keto-beta-hydroxylacyl reductoisomerase; AltName: Full=Protein KARI; Flags: Precursor;	SubName: Full=Ketol-acid reductoisomerase, chloroplastic {ECO:0000313|EMBL:PKU67377.1};	--	GO:0009507,chloroplast; GO:0004455,ketol-acid reductoisomerase activity; GO:0000287,magnesium ion binding; GO:0070402,NADPH binding; GO:0042803,protein homodimerization activity; GO:0009097,isoleucine biosynthetic process; GO:0009099,valine biosynthetic process	PF01450.19:Acetohydroxy acid isomeroreductase, catalytic domain
gene-LOC110092278	279	243	279	102	158	172	NW_021319843.1	1122003	1125289	-	LOC110092278	--	K13418 somatic embryogenesis receptor kinase 1 [EC:2.7.10.1 2.7.11.1] | (RefSeq) LRR receptor kinase BAK1 (A)	--	probable inactive receptor kinase At2g26730 [Dendrobium catenatum]	RecName: Full=Probable inactive receptor kinase At2g26730; Flags: Precursor;	SubName: Full=Putative inactive receptor kinase {ECO:0000313|EMBL:PKA51608.1};	--	GO:0016021,integral component of membrane; GO:0005886,plasma membrane; GO:0005524,ATP binding; GO:0004672,protein kinase activity	PF00069.25:Protein kinase domain
gene-LOC110092279	14	3	1	2	8	17	NW_021319862.1	585521	595749	-	LOC110092279	--	--	--	--	--	--	--	--	--
gene-LOC110092280	119	76	137	82	106	66	NW_021319843.1	981554	987460	+	LOC110092280	--	K09527 DnaJ homolog subfamily C member 7 | (RefSeq) TPR repeat-containing thioredoxin TTL1-like (A)	--	TPR repeat-containing thioredoxin TTL1 [Dendrobium catenatum]	RecName: Full=TPR repeat-containing thioredoxin TTL1; AltName: Full=Tetratricopeptide repeat thioredoxin-like 1;	SubName: Full=TPR repeat-containing thioredoxin TTL1 {ECO:0000313|EMBL:PKU67378.1};	FOG: TPR repeat	GO:0005623,cell; GO:0009738,abscisic acid-activated signaling pathway; GO:0045454,cell redox homeostasis; GO:0009789,positive regulation of abscisic acid-activated signaling pathway; GO:0009737,response to abscisic acid; GO:0006970,response to osmotic stress; GO:0009651,response to salt stress	PF07719.17:Tetratricopeptide repeat
gene-LOC110092281	296	236	366	139	221	92	NW_021319843.1	904198	911969	-	LOC110092281	--	--	--	uncharacterized protein YNL011C [Dendrobium catenatum]	--	SubName: Full=uncharacterized protein LOC103708308 isoform X3 {ECO:0000313|RefSeq:XP_008791394.2};	--	--	PF01933.18:Uncharacterised protein family UPF0052
gene-LOC110092282	154	200	229	260	313	328	NW_021319843.1	1140274	1141088	-	LOC110092282	--	K14803 protein phosphatase PTC2/3 [EC:3.1.3.16] | (RefSeq) probable protein phosphatase 2C 57 (A)	--	putative protein phosphatase 2C 57 [Dendrobium catenatum]	RecName: Full=Probable protein phosphatase 2C 57; Short=OsPP2C57; EC=3.1.3.16;	SubName: Full=Uncharacterized protein {ECO:0000313|EMBL:PKU67382.1};	Serine/threonine protein phosphatase	GO:0005829,cytosol; GO:0005634,nucleus; GO:0046872,metal ion binding; GO:0004722,protein serine/threonine phosphatase activity; GO:0050688,regulation of defense response to virus	PF00481.21:Protein phosphatase 2C
gene-LOC110092283	98	97	154	84	83	58	NW_021319567.1	2573177	2582075	+	LOC110092283	--	K17710 pentatricopeptide repeat domain-containing protein 1 | (RefSeq) putative pentatricopeptide repeat-containing protein At2g02150 (A)	--	pentatricopeptide repeat-containing protein At2g01390 [Dendrobium catenatum]	RecName: Full=Pentatricopeptide repeat-containing protein At2g01390;	SubName: Full=Pentatricopeptide repeat-containing protein {ECO:0000313|EMBL:PKU70636.1};	FOG: PPR repeat	GO:0043231,intracellular membrane-bounded organelle; GO:0004519,endonuclease activity; GO:0003723,RNA binding; GO:0009451,RNA modification	PF13041.6:PPR repeat family
gene-LOC110092284	563	573	617	473	604	452	NW_021319567.1	2668704	2675646	-	LOC110092284	--	K13169 splicing factor, arginine/serine-rich 17 | (RefSeq) hypothetical protein (A)	--	A-kinase anchor protein 17A isoform X1 [Dendrobium catenatum]	--	SubName: Full=Uncharacterized protein {ECO:0000313|EMBL:PKU70644.1};	Surface glycoprotein	--	--
gene-LOC110092285	679	880	808	1329	1630	1379	NW_021319862.1	459277	464385	+	LOC110092285	--	K07897 Ras-related protein Rab-7A | (RefSeq) ras-related protein Rab7-like isoform X1 (A)	ko04144: Endocytosis; ko04145: Phagosome	ras-related protein Rab7-like isoform X1 [Dendrobium catenatum]	RecName: Full=Ras-related protein Rab7;	SubName: Full=Ras-related protein Rab7 {ECO:0000313|EMBL:PKU67052.1};	Ras-related GTPase	GO:0005886,plasma membrane; GO:0005525,GTP binding; GO:0003924,GTPase activity; GO:0015031,protein transport	PF00071.22:Ras family
gene-LOC110092286	516	779	371	461	888	1035	NW_021319567.1	2655808	2657142	+	LOC110092286	--	--	--	--	--	--	--	--	--
gene-LOC110092287	408	395	507	227	235	176	NW_021319567.1	2551011	2567399	+	LOC110092287	--	K01537 Ca2+-transporting ATPase [EC:3.6.3.8] | (RefSeq) calcium-transporting ATPase 1, endoplasmic reticulum-type-like (A)	--	calcium-transporting ATPase 1, endoplasmic reticulum-type-like [Dendrobium catenatum]	RecName: Full=Calcium-transporting ATPase 1, endoplasmic reticulum-type; EC=3.6.3.8;	SubName: Full=Calcium-transporting ATPase 1, endoplasmic reticulum-type {ECO:0000313|EMBL:PKU70635.1};	Ca2+ transporting ATPase	GO:0005783,endoplasmic reticulum; GO:0005789,endoplasmic reticulum membrane; GO:0030176,integral component of endoplasmic reticulum membrane; GO:0005886,plasma membrane; GO:0005774,vacuolar membrane; GO:0005524,ATP binding; GO:0005388,calcium-transporting ATPase activity; GO:0046872,metal ion binding; GO:0006816,calcium ion transport; GO:0046686,response to cadmium ion; GO:0010042,response to man…	PF00689.21:Cation transporting ATPase, C-terminus
gene-LOC110092288	366	382	421	297	342	242	NW_021319567.1	2486654	2519006	+	LOC110092288	--	K13141 integrator complex subunit 4 | (RefSeq) protein SIEL isoform X1 (A)	--	protein SIEL isoform X1 [Dendrobium catenatum]	RecName: Full=Protein SIEL {ECO:0000303|PubMed:21924907}; AltName: Full=Protein SHORT-ROOT INTERACTING EMBRYONIC LETHAL {ECO:0000303|PubMed:21924907};	SubName: Full=Uncharacterized protein {ECO:0000313|EMBL:PKU70633.1};	Uncharacterized conserved protein	GO:0005938,cell cortex; GO:0005768,endosome; GO:0005634,nucleus; GO:0010496,intercellular transport; GO:0090057,root radial pattern formation; GO:0034472,snRNA 3'-end processing	PF02985.22:HEAT repeat
gene-LOC110092289	97	68	136	68	100	48	NW_021319567.1	2518629	2521775	+	LOC110092289	--	--	--	uncharacterized protein LOC110092289 [Dendrobium catenatum]	--	SubName: Full=Uncharacterized protein {ECO:0000313|EMBL:PKU70634.1};	--	--	--
gene-LOC110092290	378	436	473	625	623	412	NW_021319567.1	2299732	2362053	-	LOC110092290	--	K19199 histone-lysine N-methyltransferase SETD3 [EC:2.1.1.43] | (RefSeq) ribulose-1,5 bisphosphate carboxylase/oxygenase large subunit N-methyltransferase, chloroplastic isoform X1 (A)	--	ribulose-1,5 bisphosphate carboxylase/oxygenase large subunit N-methyltransferase, chloroplastic isoform X1 [Dendrobium catenatum]	RecName: Full=Ribulose-1,5 bisphosphate carboxylase/oxygenase large subunit N-methyltransferase, chloroplastic; EC=2.1.1.127; AltName: Full=[Ribulose-bisphosphate carboxylase]-lysine N-methyltransferase; Short=RuBisCO LSMT; Short=RuBisCO methyltransferase; Short=rbcMT; Flags: Precursor;	SubName: Full=Ribulose-1,5 bisphosphate carboxylase/oxygenase large subunit N-methyltransferase, chloroplastic {ECO:0000313|EMBL:PKU70628.1};	Uncharacterized conserved protein	GO:0009507,chloroplast; GO:0030785,[ribulose-bisphosphate carboxylase]-lysine N-methyltransferase activity	PF00856.28:SET domain
gene-LOC110092291	360	367	458	376	478	432	NW_021319567.1	2681806	2703030	+	LOC110092291	--	K17710 pentatricopeptide repeat domain-containing protein 1 | (RefSeq) pentatricopeptide repeat-containing protein At2g18940, chloroplastic-like (A)	--	pentatricopeptide repeat-containing protein At5g67570, chloroplastic-like [Dendrobium catenatum]	RecName: Full=Pentatricopeptide repeat-containing protein At5g67570, chloroplastic; AltName: Full=Protein DELAYED GREENING 1; AltName: Full=Protein EMBRYO DEFECTIVE 1408; Flags: Precursor;	SubName: Full=Pentatricopeptide repeat-containing protein {ECO:0000313|EMBL:PKU70645.1};	FOG: PPR repeat	GO:0009507,chloroplast; GO:0004519,endonuclease activity; GO:0003723,RNA binding; GO:0009658,chloroplast organization; GO:0009451,RNA modification; GO:0042793,plastid transcription	PF13041.6:PPR repeat family
gene-LOC110092292	1972	1488	2411	1702	1947	870	NW_021319567.1	2112303	2124902	-	LOC110092292	--	K09420 transcriptional activator Myb | (RefSeq) myb-related protein 3R-1 isoform X1 (A)	--	Myb-related protein 3R-1 [Dendrobium catenatum]	RecName: Full=Transcription factor MYB3R-1 {ECO:0000303|PubMed:11597504}; AltName: Full=Myb-related protein 3R-1 {ECO:0000303|PubMed:11597504}; AltName: Full=Plant c-MYB-like protein 1 {ECO:0000303|PubMed:10482656}; Short=Protein PC-MYB1 {ECO:0000303|PubMed:10482656};	SubName: Full=Myb-related protein 3R-1 {ECO:0000313|EMBL:PKU70622.1};	Transcription factor, Myb superfamily	GO:0005634,nucleus; GO:0000981,DNA-binding transcription factor activity, RNA polymerase II-specific; GO:0043565,sequence-specific DNA binding; GO:0001135,RNA polymerase II transcription regulator recruiting activity; GO:0044212,transcription regulatory region DNA binding; GO:0030154,cell differentiation; GO:0008285,negative regulation of cell proliferation; GO:1901181,negative regulation of cell…	--
gene-LOC110092293	923	840	1199	581	687	891	NW_021319567.1	2045837	2052113	-	LOC110092293	--	K09338 homeobox-leucine zipper protein | (RefSeq) homeobox-leucine zipper protein ROC5-like (A)	--	homeobox-leucine zipper protein ROC5-like [Dendrobium catenatum]	RecName: Full=Homeobox-leucine zipper protein ANTHOCYANINLESS 2; AltName: Full=HD-ZIP protein ANL2; AltName: Full=Homeodomain protein AHDP; AltName: Full=Homeodomain transcription factor ANL2;	SubName: Full=Homeobox-leucine zipper protein ANTHOCYANINLESS 2 {ECO:0000313|EMBL:PKU70616.1};	--	GO:0005634,nucleus; GO:0003700,DNA-binding transcription factor activity; GO:0008289,lipid binding; GO:0043565,sequence-specific DNA binding; GO:0043481,anthocyanin accumulation in tissues in response to UV light; GO:0042335,cuticle development; GO:0009827,plant-type cell wall modification; GO:0048364,root development; GO:0048765,root hair cell differentiation; GO:0006351,transcription, DNA-templ…	PF01852.19:START domain
gene-LOC110092294	578	521	674	755	800	456	NW_021319567.1	2289171	2296267	-	LOC110092294	--	K03841 fructose-1,6-bisphosphatase I [EC:3.1.3.11] | (RefSeq) fructose-1,6-bisphosphatase, cytosolic-like (A)	ko00010: Glycolysis / Gluconeogenesis; ko00030: Pentose phosphate pathway; ko00051: Fructose and mannose metabolism; ko00710: Carbon fixation in photosynthetic organisms; ko01200: Carbon metabolism	protein NETWORKED 2A-like [Dendrobium catenatum]	RecName: Full=Protein NETWORKED 2A {ECO:0000303|PubMed:22840520};	SubName: Full=Uncharacterized protein {ECO:0000313|EMBL:PKU70627.1};	--	GO:0005886,plasma membrane; GO:0003779,actin binding	PF07765.12:KIP1-like protein
gene-LOC110092295	1117	1349	1102	715	1653	1063	NW_021319567.1	2376153	2376973	+	LOC110092295	--	--	--	uncharacterized protein LOC110092295 [Dendrobium catenatum]	--	SubName: Full=Uncharacterized protein {ECO:0000313|EMBL:PKU70629.1};	FKBP-type peptidyl-prolyl cis-trans isomerase	--	PF00504.21:Chlorophyll A-B binding protein
gene-LOC110092296	1677	1568	2108	1275	1851	1423	NW_021319567.1	2089289	2110654	+	LOC110092296	--	K15029 translation initiation factor 3 subunit L | (RefSeq) eukaryotic translation initiation factor 3 subunit L-like (A)	--	eukaryotic translation initiation factor 3 subunit L-like [Dendrobium catenatum]	--	SubName: Full=Uncharacterized protein {ECO:0000313|EMBL:PKU70621.1};	RNA polymerase I-associated factor - PAF67	--	PF10255.9:RNA polymerase I-associated factor PAF67
gene-LOC110092297	199	149	241	176	287	190	NW_021319178.1	1864769	1885632	-	LOC110092297	--	--	--	uncharacterized protein LOC110092297 [Dendrobium catenatum]	RecName: Full=Homeobox-DDT domain protein RLT1 {ECO:0000305}; AltName: Full=Protein HOMEOBOX-1 {ECO:0000305}; AltName: Full=Protein RINGLET 1 {ECO:0000303|PubMed:22694359};	SubName: Full=Uncharacterized protein {ECO:0000313|EMBL:PKU76401.1};	--	GO:0005634,nucleus; GO:0003677,DNA binding; GO:0003700,DNA-binding transcription factor activity; GO:0009908,flower development; GO:0045892,negative regulation of transcription, DNA-templated; GO:0048510,regulation of timing of transition from vegetative to reproductive phase; GO:0006351,transcription, DNA-templated	PF00046.29:Homeodomain
gene-LOC110092298	10	12	31	86	147	108	NW_021319567.1	2282043	2287624	-	LOC110092298	--	--	--	--	--	--	--	--	--
gene-LOC110092299	76	43	75	59	51	46	NW_021319567.1	2389575	2395389	-	LOC110092299	--	K05681 ATP-binding cassette, subfamily G (WHITE), member 2 | (RefSeq) ABC transporter G family member 5-like (A)	ko02010: ABC transporters	ABC transporter G family member 6-like [Dendrobium catenatum]	RecName: Full=ABC transporter G family member 1; Short=ABC transporter ABCG.1; Short=AtABCG1; AltName: Full=White-brown complex homolog protein 1; Short=AtWBC1;	SubName: Full=ABC transporter G family member 2 {ECO:0000313|EMBL:PKU70630.1};	Transporter, ABC superfamily (Breast cancer resistance protein)	GO:0016021,integral component of membrane; GO:0005886,plasma membrane; GO:0005524,ATP binding; GO:0042626,ATPase activity, coupled to transmembrane movement of substances; GO:0010208,pollen wall assembly; GO:0009624,response to nematode	PF01061.24:ABC-2 type transporter
gene-LOC110092300	36	31	21	31	19	3	NW_021319567.1	2587095	2588249	+	LOC110092300	--	K07305 peptide-methionine (R)-S-oxide reductase [EC:1.8.4.12] | (RefSeq) uncharacterized mitochondrial protein AtMg00810-like (A)	--	uncharacterized protein LOC110092300 [Dendrobium catenatum]	RecName: Full=Retrovirus-related Pol polyprotein from transposon RE1; AltName: Full=Retro element 1 {ECO:0000303|PubMed:10689195}; Short=AtRE1 {ECO:0000303|PubMed:10689195}; Includes: RecName: Full=Protease RE1; EC=3.4.23.-; Includes: RecName: Full=Reverse transcriptase RE1; EC=2.7.7.49; Includes: RecName: Full=Endonuclease RE1;	SubName: Full=Retrovirus-related Pol polyprotein from transposon TNT 1-94 {ECO:0000313|EMBL:PKU73341.1};	FOG: Transposon-encoded proteins with TYA, reverse transcriptase, integrase domains in various combinations	GO:0004190,aspartic-type endopeptidase activity; GO:0004519,endonuclease activity; GO:0046872,metal ion binding; GO:0003676,nucleic acid binding; GO:0003964,RNA-directed DNA polymerase activity; GO:0015074,DNA integration; GO:0006310,DNA recombination	PF07727.14:Reverse transcriptase (RNA-dependent DNA polymerase)
gene-LOC110092301	54	60	112	217	160	136	NW_021319567.1	2244296	2258264	+	LOC110092301	--	K10398 kinesin family member 11 | (RefSeq) kinesin-like protein KIN-5A (A)	--	kinesin-like protein KIN-5A [Dendrobium catenatum]	RecName: Full=Kinesin-like protein KIN-5A {ECO:0000305};	SubName: Full=125 kDa kinesin-related protein {ECO:0000313|EMBL:PKU70625.1};	Kinesin-like protein	GO:0005737,cytoplasm; GO:0005871,kinesin complex; GO:0005874,microtubule; GO:0005819,spindle; GO:0005524,ATP binding; GO:0008574,ATP-dependent microtubule motor activity, plus-end-directed; GO:0008017,microtubule binding; GO:0007018,microtubule-based movement	PF00225.23:Kinesin motor domain
gene-LOC110092303	123	107	121	86	119	90	NW_021319178.1	2446222	2448819	-	LOC110092303	--	K23541 Ca2+/H+ antiporter, TMEM165/GDT1 family | (RefSeq) pentatricopeptide repeat-containing protein At3g24000, mitochondrial-like (A)	--	putative pentatricopeptide repeat-containing protein At1g68930 isoform X1 [Dendrobium catenatum]	RecName: Full=Putative pentatricopeptide repeat-containing protein At1g68930;	SubName: Full=Pentatricopeptide repeat-containing protein {ECO:0000313|EMBL:PKA54748.1}; EC=3.6.1.- {ECO:0000313|EMBL:PKA54748.1};	FOG: PPR repeat	GO:0043231,intracellular membrane-bounded organelle; GO:0004519,endonuclease activity; GO:0003723,RNA binding; GO:0008270,zinc ion binding; GO:0009451,RNA modification	PF01535.20:PPR repeat
gene-LOC110092304	4	11	7	5	0	7	NW_021319567.1	2596387	2598779	-	LOC110092304	--	--	--	uncharacterized protein LOC110092304 [Dendrobium catenatum]	--	SubName: Full=Uncharacterized protein {ECO:0000313|EMBL:PKU70638.1};	--	--	PF07767.11:Nop53 (60S ribosomal biogenesis)
gene-LOC110092305	242	196	278	199	247	234	NW_021319567.1	2233398	2235805	+	LOC110092305	--	--	--	BTB/POZ domain-containing protein At5g60050 [Dendrobium catenatum]	RecName: Full=BTB/POZ domain-containing protein At5g60050;	SubName: Full=BTB/POZ domain-containing protein {ECO:0000313|EMBL:PKU70624.1};	--	GO:0016567,protein ubiquitination	--
gene-LOC110092306	14	11	16	37	57	35	NW_021320146.1	253385	254740	-	LOC110092306	--	K09285 AP2-like factor, ANT lineage | (RefSeq) AP2-like ethylene-responsive transcription factor ANT (A)	--	protein BIG GRAIN 1-like [Dendrobium catenatum]	RecName: Full=Protein BIG GRAIN 1 {ECO:0000305};	SubName: Full=Uncharacterized protein {ECO:0000313|EMBL:PKU63240.1};	--	GO:0005886,plasma membrane; GO:0060918,auxin transport; GO:0009734,auxin-activated signaling pathway; GO:0009630,gravitropism; GO:0010929,positive regulation of auxin mediated signaling pathway; GO:0080113,regulation of seed growth	--
gene-LOC110092307	383	346	406	307	417	438	NW_021319567.1	2662427	2664086	+	LOC110092307	--	--	--	F-box protein At3g12350 [Dendrobium catenatum]	RecName: Full=F-box protein At3g12350;	SubName: Full=F-box protein {ECO:0000313|EMBL:PKU70643.1};	--	--	PF00646.33:F-box domain
gene-LOC110092308	1419	1791	1664	1927	3620	2815	NW_021319567.1	2612280	2619279	-	LOC110092308	--	K07955 ADP-ribosylation factor-like protein 8 | (RefSeq) ADP-ribosylation factor-like protein 8a (A)	--	ADP-ribosylation factor-like protein 8a [Dendrobium catenatum]	RecName: Full=ADP-ribosylation factor-like protein 8a {ECO:0000303|PubMed:22174675}; Short=AtARL8a {ECO:0000303|PubMed:22174675}; AltName: Full=ADP-ribosylation factor-like A1C {ECO:0000303|PubMed:12644670}; Short=AtARLA1C {ECO:0000303|PubMed:12644670};	SubName: Full=ADP-ribosylation factor 1 {ECO:0000313|EMBL:PKU70640.1};	GTP-binding ADP-ribosylation factor-like protein	GO:0005737,cytoplasm; GO:0005829,cytosol; GO:0005794,Golgi apparatus; GO:0031902,late endosome membrane; GO:0005765,lysosomal membrane; GO:0005634,nucleus; GO:0005886,plasma membrane; GO:0009506,plasmodesma; GO:0005819,spindle; GO:0005774,vacuolar membrane; GO:0005773,vacuole; GO:0005525,GTP binding; GO:0007049,cell cycle; GO:0051301,cell division; GO:0007059,chromosome segregation; GO:0051607,de…	PF00025.21:ADP-ribosylation factor family
gene-LOC110092309	774	788	1003	706	914	504	NW_021319567.1	2605169	2609963	+	LOC110092309	--	K10598 peptidyl-prolyl cis-trans isomerase-like 2 [EC:5.2.1.8] | (RefSeq) peptidyl-prolyl cis-trans isomerase CYP65 (A)	ko04120: Ubiquitin mediated proteolysis	peptidyl-prolyl cis-trans isomerase CYP65 [Dendrobium catenatum]	RecName: Full=Peptidyl-prolyl cis-trans isomerase CYP65 {ECO:0000305}; Short=AtCYP65; Short=PPIase CYP65; EC=2.3.2.27 {ECO:0000250|UniProtKB:Q13356}; EC=5.2.1.8 {ECO:0000250|UniProtKB:Q08752}; AltName: Full=Cyclophilin-65; AltName: Full=Peptidyl-prolyl cis-trans isomerase-like 2; AltName: Full=Plant U-box protein 49; AltName: Full=RING-type E3 ubiquitin transferase isomerase-like 2 {ECO:0000305};…	SubName: Full=Peptidyl-prolyl cis-trans isomerase-like 2 {ECO:0000313|EMBL:PKU70639.1};	Cyclophilin type, U box-containing peptidyl-prolyl cis-trans isomerase	GO:0005634,nucleus; GO:0003755,peptidyl-prolyl cis-trans isomerase activity; GO:0034450,ubiquitin-ubiquitin ligase activity; GO:0006457,protein folding; GO:0000209,protein polyubiquitination	PF00160.21:Cyclophilin type peptidyl-prolyl cis-trans isomerase/CLD
gene-LOC110092310	0	0	0	34	28	24	NW_021319567.1	2610342	2611691	+	LOC110092310	--	K10598 peptidyl-prolyl cis-trans isomerase-like 2 [EC:5.2.1.8] | (RefSeq) peptidyl-prolyl cis-trans isomerase CYP65 (A)	ko04120: Ubiquitin mediated proteolysis	peptidyl-prolyl cis-trans isomerase CYP65-like [Dendrobium catenatum]	RecName: Full=Peptidyl-prolyl cis-trans isomerase CYP65 {ECO:0000305}; Short=AtCYP65; Short=PPIase CYP65; EC=2.3.2.27 {ECO:0000250|UniProtKB:Q13356}; EC=5.2.1.8 {ECO:0000250|UniProtKB:Q08752}; AltName: Full=Cyclophilin-65; AltName: Full=Peptidyl-prolyl cis-trans isomerase-like 2; AltName: Full=Plant U-box protein 49; AltName: Full=RING-type E3 ubiquitin transferase isomerase-like 2 {ECO:0000305};…	SubName: Full=Peptidyl-prolyl cis-trans isomerase-like 2 {ECO:0000313|EMBL:PKU70639.1};	Cyclophilin type, U box-containing peptidyl-prolyl cis-trans isomerase	GO:0005634,nucleus; GO:0003755,peptidyl-prolyl cis-trans isomerase activity; GO:0034450,ubiquitin-ubiquitin ligase activity; GO:0006457,protein folding; GO:0000209,protein polyubiquitination	--
gene-LOC110092311	787	764	824	256	214	113	NW_021319405.1	89198	93849	+	LOC110092311	--	K14638 solute carrier family 15 (peptide/histidine transporter), member 3/4 | (RefSeq) protein NRT1/ PTR FAMILY 7.3 isoform X1 (A)	--	protein NRT1/ PTR FAMILY 7.3-like isoform X1 [Dendrobium catenatum]	RecName: Full=Protein NRT1/ PTR FAMILY 7.3; Short=AtNPF7.3; AltName: Full=Nitrate transporter 1.5;	SubName: Full=Nitrate transporter 1.5 {ECO:0000313|EMBL:PKU73223.1};	H+/oligopeptide symporter	GO:0016021,integral component of membrane; GO:0005886,plasma membrane; GO:0015112,nitrate transmembrane transporter activity; GO:0015386,potassium:proton antiporter activity; GO:0015293,symporter activity; GO:1902600,proton transmembrane transport; GO:0010150,leaf senescence; GO:0015706,nitrate transport; GO:0055075,potassium ion homeostasis; GO:0010167,response to nitrate	PF00854.21:POT family
gene-LOC110092312	189	171	244	194	249	201	NW_021319405.1	715345	716563	-	LOC110092312	--	--	--	putative VAMP-like protein [Dendrobium catenatum]	RecName: Full=Phytolongin Phyl1.1 {ECO:0000303|PubMed:19889231};	SubName: Full=Putative VAMP-like protein {ECO:0000313|EMBL:PKU73245.1};	--	GO:0016021,integral component of membrane; GO:0005886,plasma membrane; GO:0031201,SNARE complex; GO:0005484,SNAP receptor activity; GO:0000149,SNARE binding; GO:0006887,exocytosis; GO:0015031,protein transport; GO:0006906,vesicle fusion	--
gene-LOC110092313	586	798	677	756	856	871	NW_021319405.1	589983	619817	+	LOC110092313	--	K12890 splicing factor, arginine/serine-rich 1 | (RefSeq) serine/arginine-rich splicing factor SR34A-like isoform X1 (A)	ko03040: Spliceosome	serine/arginine-rich splicing factor SR34A-like isoform X1 [Dendrobium catenatum]	RecName: Full=Serine/arginine-rich splicing factor SR34A; Short=At-SR34A; Short=At-SRp34A; Short=AtSR34A; AltName: Full=SER/ARG-rich protein 34A;	SubName: Full=Pre-mRNA-splicing factor SF2 {ECO:0000313|EMBL:PKA57970.1};	Alternative splicing factor ASF/SF2 (RRM superfamily)	GO:0005829,cytosol; GO:0016607,nuclear speck; GO:0005730,nucleolus; GO:0005681,spliceosomal complex; GO:0003729,mRNA binding; GO:0006397,mRNA processing; GO:0008380,RNA splicing	PF00076.22:RNA recognition motif. (a.k.a. RRM, RBD, or RNP domain)
gene-LOC110092314	2061	2049	2454	1830	2069	1540	NW_021319405.1	429802	451642	+	LOC110092314	--	--	--	uncharacterized protein LOC110092314 [Dendrobium catenatum]	RecName: Full=PHD finger protein At2g01810;	SubName: Full=PHD finger protein {ECO:0000313|EMBL:PKU73235.1};	--	GO:0005634,nucleus; GO:0046872,metal ion binding; GO:0006355,regulation of transcription, DNA-templated; GO:0006351,transcription, DNA-templated	PF00628.29:PHD-finger
gene-LOC110092315	550	493	688	379	386	221	NW_021319405.1	455044	505621	-	LOC110092315	--	K05288 phosphatidylinositol glycan, class O | (RefSeq) GPI ethanolamine phosphate transferase 3 isoform X1 (A)	ko00563: Glycosylphosphatidylinositol (GPI)-anchor biosynthesis	GPI ethanolamine phosphate transferase 3 isoform X1 [Dendrobium catenatum]	--	SubName: Full=Uncharacterized protein {ECO:0000313|EMBL:PKU73237.1};	Glycosylphosphatidylinositol anchor synthesis protein	--	PF01663.22:Type I phosphodiesterase / nucleotide pyrophosphatase
gene-LOC110092316	0	0	0	0	2	2	NW_021319178.1	1976159	1979776	-	LOC110092316	--	K00276 primary-amine oxidase [EC:1.4.3.21] | (RefSeq) primary amine oxidase-like (A)	ko00260: Glycine, serine and threonine metabolism; ko00350: Tyrosine metabolism; ko00360: Phenylalanine metabolism; ko00410: beta-Alanine metabolism; ko00950: Isoquinoline alkaloid biosynthesis; ko00960: Tropane, piperidine and pyridine alkaloid biosynthesis	primary amine oxidase-like [Dendrobium catenatum]	RecName: Full=Primary amine oxidase; EC=1.4.3.21 {ECO:0000250|UniProtKB:P12807}; AltName: Full=Amine oxidase [copper-containing]; Flags: Precursor;	SubName: Full=Primary amine oxidase {ECO:0000313|EMBL:PKU76404.1};	Copper amine oxidase	GO:0052595,aliphatic-amine oxidase activity; GO:0052594,aminoacetone:oxygen oxidoreductase(deaminating) activity; GO:0005507,copper ion binding; GO:0052597,diamine oxidase activity; GO:0052596,phenethylamine:oxygen oxidoreductase (deaminating) activity; GO:0008131,primary amine oxidase activity; GO:0048038,quinone binding; GO:0052593,tryptamine:oxygen oxidoreductase (deaminating) activity; GO:000…	PF01179.20:Copper amine oxidase, enzyme domain
gene-LOC110092317	474	533	646	773	846	718	NW_021319405.1	326565	357547	-	LOC110092317	--	--	--	Filament-like plant protein 4 [Dendrobium catenatum]	RecName: Full=Filament-like plant protein 4; Short=AtFPP4;	SubName: Full=Filament-like plant protein 4 {ECO:0000313|EMBL:PKU73233.1};	--	GO:0005886,plasma membrane; GO:0008017,microtubule binding; GO:0046785,microtubule polymerization; GO:0010090,trichome morphogenesis	PF05911.11:Filament-like plant protein, long coiled-coil
gene-LOC110092318	1654	1696	2170	1993	2571	1789	NW_021319405.1	516439	552476	+	LOC110092318	--	K11835 ubiquitin carboxyl-terminal hydrolase 4/11 [EC:3.4.19.12] | (RefSeq) ubiquitin carboxyl-terminal hydrolase 5-like isoform X1 (A)	--	ubiquitin carboxyl-terminal hydrolase 9-like [Dendrobium catenatum]	RecName: Full=Ubiquitin carboxyl-terminal hydrolase 10; EC=3.4.19.12; AltName: Full=Deubiquitinating enzyme 10; Short=AtUBP10; AltName: Full=Ubiquitin thioesterase 10; AltName: Full=Ubiquitin-specific-processing protease 10;	SubName: Full=Ubiquitin carboxyl-terminal hydrolase 10 {ECO:0000313|EMBL:PKU73238.1};	Ubiquitin C-terminal hydrolase	GO:0004843,thiol-dependent ubiquitin-specific protease activity; GO:0016579,protein deubiquitination; GO:0006511,ubiquitin-dependent protein catabolic process	PF00443.29:Ubiquitin carboxyl-terminal hydrolase
gene-LOC110092319	666	719	591	880	1311	792	NW_021319405.1	791592	822685	+	LOC110092319	--	K09510 DnaJ homolog subfamily B member 4 | (RefSeq) dnaJ homolog subfamily B member 1-like isoform X1 (A)	--	dnaJ homolog subfamily B member 6-B-like isoform X2 [Dendrobium catenatum]	RecName: Full=DnaJ protein homolog; AltName: Full=DNAJ-1; Flags: Precursor;	SubName: Full=Chaperone protein dnaJ 2 {ECO:0000313|EMBL:PKU73249.1};	Molecular chaperone (DnaJ superfamily)	GO:0005886,plasma membrane; GO:0005524,ATP binding; GO:0031072,heat shock protein binding; GO:0046872,metal ion binding; GO:0051082,unfolded protein binding; GO:0006457,protein folding; GO:0009408,response to heat	PF00226.31:DnaJ domain
gene-LOC110092320	1904	1623	2288	1175	1566	942	NW_021319405.1	197079	304055	+	LOC110092320	--	K14401 cleavage and polyadenylation specificity factor subunit 1 | (RefSeq) cleavage and polyadenylation specificity factor subunit 1 (A)	ko03015: mRNA surveillance pathway	cleavage and polyadenylation specificity factor subunit 1 [Dendrobium catenatum]	RecName: Full=Cleavage and polyadenylation specificity factor subunit 1; AltName: Full=Cleavage and polyadenylation specificity factor 160 kDa subunit; Short=AtCPSF160; Short=CPSF 160 kDa subunit;	SubName: Full=cleavage and polyadenylation specificity factor subunit 1 isoform X2 {ECO:0000313|RefSeq:XP_008791964.1};	mRNA cleavage and polyadenylation factor II complex, subunit CFT1 (CPSF subunit)	GO:0005829,cytosol; GO:0005634,nucleus; GO:0003729,mRNA binding; GO:0006379,mRNA cleavage; GO:0006378,mRNA polyadenylation	PF03178.15:CPSF A subunit region
gene-LOC110092321	698	707	879	738	1020	585	NW_021319405.1	96620	107833	-	LOC110092321	--	K00873 pyruvate kinase [EC:2.7.1.40] | (RefSeq) pyruvate kinase isozyme G, chloroplastic-like (A)	ko00010: Glycolysis / Gluconeogenesis; ko00230: Purine metabolism; ko00620: Pyruvate metabolism; ko01200: Carbon metabolism; ko01230: Biosynthesis of amino acids	pyruvate kinase isozyme G, chloroplastic-like [Dendrobium catenatum]	RecName: Full=Pyruvate kinase isozyme G, chloroplastic; EC=2.7.1.40; Flags: Precursor;	SubName: Full=Pyruvate kinase isozyme G, chloroplastic {ECO:0000313|EMBL:PKU73224.1};	Pyruvate kinase	GO:0009507,chloroplast; GO:0005524,ATP binding; GO:0016301,kinase activity; GO:0000287,magnesium ion binding; GO:0030955,potassium ion binding; GO:0004743,pyruvate kinase activity	PF00224.21:Pyruvate kinase, barrel domain
gene-LOC110092322	414	362	379	470	696	567	NW_021319405.1	115658	122733	-	LOC110092322	--	K09008 NADH dehydrogenase [ubiquinone] 1 alpha subcomplex assembly factor 3 | (RefSeq) NADH dehydrogenase [ubiquinone] 1 alpha subcomplex assembly factor 3-like isoform X1 (A)	--	NADH dehydrogenase [ubiquinone]	--	SubName: Full=Uncharacterized protein {ECO:0000313|EMBL:PKU73225.1};	Uncharacterized conserved nuclear protein	--	PF04430.14:Protein of unknown function (DUF498/DUF598)
gene-LOC110092324	22	23	24	11	8	5	NW_021319405.1	16884	21818	+	LOC110092324	--	K01115 phospholipase D1/2 [EC:3.1.4.4] | (RefSeq) uncharacterized protein LOC110092324 (A)	ko00564: Glycerophospholipid metabolism; ko00565: Ether lipid metabolism; ko04144: Endocytosis	Pentatricopeptide repeat-containing protein [Dendrobium catenatum]	RecName: Full=Phospholipase D beta 1 {ECO:0000303|PubMed:11891260}; Short=AtPLDbeta1 {ECO:0000303|PubMed:11891260}; Short=PLD beta 1 {ECO:0000303|PubMed:11891260}; Short=PLDbeta {ECO:0000303|PubMed:9054397}; EC=3.1.4.4 {ECO:0000269|PubMed:10441386, ECO:0000269|PubMed:9054397, ECO:0000269|PubMed:9353280};	SubName: Full=Pentatricopeptide repeat-containing protein {ECO:0000313|EMBL:PKU73221.1};	Phospholipase D1	GO:0005737,cytoplasm; GO:0016020,membrane; GO:0009506,plasmodesma; GO:0070290,N-acylphosphatidylethanolamine-specific phospholipase D activity; GO:0005546,phosphatidylinositol-4,5-bisphosphate binding; GO:0004630,phospholipase D activity; GO:0009816,defense response to bacterium, incompatible interaction; GO:0016042,lipid catabolic process; GO:0046686,response to cadmium ion	PF00168.30:C2 domain
gene-LOC110092325	952	850	1056	311	499	320	NW_021319405.1	14433	16743	+	LOC110092325	--	K17710 pentatricopeptide repeat domain-containing protein 1 | (RefSeq) pentatricopeptide repeat-containing protein At2g18940, chloroplastic (A)	--	pentatricopeptide repeat-containing protein At5g46580, chloroplastic [Dendrobium catenatum]	RecName: Full=Pentatricopeptide repeat-containing protein At5g46580, chloroplastic; Flags: Precursor;	SubName: Full=Pentatricopeptide repeat-containing protein {ECO:0000313|EMBL:PKU73221.1};	FOG: PPR repeat	GO:0009507,chloroplast; GO:0004519,endonuclease activity; GO:0003723,RNA binding; GO:0009451,RNA modification	PF13041.6:PPR repeat family
gene-LOC110092326	43	88	29	76	101	243	NW_021319405.1	624720	635234	-	LOC110092326	--	K16221 transcription factor TCP21 (protein CCA1 HIKING EXPEDITION) | (RefSeq) transcription factor TCP21 (A)	ko04712: Circadian rhythm - plant	transcription factor PCF2-like [Dendrobium catenatum]	RecName: Full=Transcription factor PCF2;	SubName: Full=Transcription factor PCF2 {ECO:0000313|EMBL:PKU73241.1};	--	GO:0005634,nucleus; GO:0003677,DNA binding; GO:0007275,multicellular organism development; GO:0006355,regulation of transcription, DNA-templated; GO:0006351,transcription, DNA-templated	PF03634.13:TCP family transcription factor
gene-LOC110092327	35	15	35	45	32	29	NW_021319405.1	312591	313436	+	LOC110092327	--	K14488 SAUR family protein | (RefSeq) auxin-responsive protein SAUR50-like (A)	ko04075: Plant hormone signal transduction	auxin-responsive protein SAUR50-like [Dendrobium catenatum]	RecName: Full=Auxin-responsive protein SAUR50 {ECO:0000303|PubMed:12036261}; AltName: Full=Protein SMALL AUXIN UP RNA 50 {ECO:0000303|PubMed:12036261};	SubName: Full=Auxin-induced protein 15A {ECO:0000313|EMBL:PKU73232.1};	--	GO:0009734,auxin-activated signaling pathway; GO:0040008,regulation of growth	PF02519.14:Auxin responsive protein
gene-LOC110092328	2593	2436	3380	2212	3417	1510	NW_021319405.1	743083	759716	-	LOC110092328	--	K14491 two-component response regulator ARR-B family | (RefSeq) uncharacterized protein LOC100191412 (A)	ko04075: Plant hormone signal transduction	probable transcription factor GLK1 isoform X2 [Dendrobium catenatum]	RecName: Full=Transcription activator GLK1; AltName: Full=GBF'S PRO-RICH REGION-INTERACTING factor 1; AltName: Full=Golden2-like protein 1; Short=AtGLK1;	SubName: Full=Transcription activator GLK1 {ECO:0000313|EMBL:PKU73247.1};	--	GO:0005634,nucleus; GO:0003677,DNA binding; GO:1900056,negative regulation of leaf senescence; GO:0006355,regulation of transcription, DNA-templated; GO:0006351,transcription, DNA-templated	PF00249.31:Myb-like DNA-binding domain
gene-LOC110092329	349	378	391	346	414	414	NW_021319405.1	388528	413282	-	LOC110092329	--	K12831 splicing factor 3B subunit 4 | (RefSeq) hypothetical protein (A)	ko03040: Spliceosome	polyadenylate-binding protein-interacting protein 11-like [Dendrobium catenatum]	RecName: Full=Polyadenylate-binding protein-interacting protein 11; Short=PABP-interacting protein 11; Short=Poly(A)-binding protein-interacting protein 11; AltName: Full=PAM2-containing protein CID11; AltName: Full=Protein CTC-INTERACTING DOMAIN 11;	SubName: Full=Polyadenylate-binding protein 3 {ECO:0000313|EMBL:PKU78307.1};	FOG: RRM domain	GO:0005634,nucleus; GO:0003723,RNA binding	PF00076.22:RNA recognition motif. (a.k.a. RRM, RBD, or RNP domain)
gene-LOC110092331	1	3	0	24	20	24	NW_021319405.1	779432	788047	-	LOC110092331	--	K01456 peptide-N4-(N-acetyl-beta-glucosaminyl)asparagine amidase [EC:3.5.1.52] | (RefSeq) peptide-N(4)-(N-acetyl-beta- glucosaminyl)asparagine amidase-like (A)	ko04141: Protein processing in endoplasmic reticulum	putative aldo-keto reductase 2 [Dendrobium catenatum]	RecName: Full=Probable aldo-keto reductase 2; EC=1.1.1.-;	SubName: Full=Putative aldo-keto reductase 2 {ECO:0000313|EMBL:PKU73248.1};	Voltage-gated shaker-like K+ channel, subunit beta/KCNAB	GO:0016491,oxidoreductase activity	PF00248.21:Aldo/keto reductase family
gene-LOC110092332	5	1	1	6	0	5	NW_021319405.1	169925	171901	-	LOC110092332	--	--	--	Umecyanin [Dendrobium catenatum]	RecName: Full=Umecyanin {ECO:0000303|PubMed:5490233}; Short=UMC {ECO:0000303|PubMed:15631465};	SubName: Full=Umecyanin {ECO:0000313|EMBL:PKU73226.1};	--	GO:0009055,electron transfer activity; GO:0046872,metal ion binding	PF02298.17:Plastocyanin-like domain
gene-LOC110092333	0	2	0	0	2	6	NW_021319405.1	172607	180342	-	LOC110092333	--	K14975 codeine 3-O-demethylase [EC:1.14.11.32] | (RefSeq) codeine O-demethylase (A)	ko00950: Isoquinoline alkaloid biosynthesis	S-norcoclaurine synthase 1-like [Dendrobium catenatum]	RecName: Full=S-norcoclaurine synthase 1; Short=CjNCS1; EC=4.2.1.78;	SubName: Full=S-norcoclaurine synthase 1 {ECO:0000313|EMBL:PKU73227.1};	Iron/ascorbate family oxidoreductases	GO:0050474,(S)-norcoclaurine synthase activity; GO:0046872,metal ion binding; GO:0016491,oxidoreductase activity; GO:0009820,alkaloid metabolic process	PF14226.6:non-haem dioxygenase in morphine synthesis N-terminal
gene-LOC110092336	1304	1275	1371	959	1389	1268	NW_021319405.1	637103	676464	-	LOC110092336	--	K09493 T-complex protein 1 subunit alpha | (RefSeq) T-complex protein 1 subunit alpha (A)	--	T-complex protein 1 subunit alpha [Dendrobium catenatum]	RecName: Full=T-complex protein 1 subunit alpha {ECO:0000303|PubMed:11599560}; Short=TCP-1-alpha {ECO:0000303|PubMed:11599560}; AltName: Full=CCT-alpha {ECO:0000303|PubMed:11599560}; AltName: Full=Chaperonin CCT1 {ECO:0000305};	SubName: Full=TCP1-like protein {ECO:0000313|EMBL:ATU32531.1};	Chaperonin complex component, TCP-1 alpha subunit (CCT1)	GO:0005832,chaperonin-containing T-complex; GO:0005829,cytosol; GO:0005524,ATP binding; GO:0044183,protein binding involved in protein folding; GO:0051082,unfolded protein binding; GO:0006458,'de novo' protein folding; GO:0061077,chaperone-mediated protein folding	PF00118.24:TCP-1/cpn60 chaperonin family
gene-LOC110092338	0	1	0	10	0	0	NW_021319405.1	133790	153873	-	LOC110092338	--	K14975 codeine 3-O-demethylase [EC:1.14.11.32] | (RefSeq) codeine O-demethylase (A)	ko00950: Isoquinoline alkaloid biosynthesis	S-norcoclaurine synthase 1-like [Dendrobium catenatum]	RecName: Full=S-norcoclaurine synthase 1; Short=CjNCS1; EC=4.2.1.78;	SubName: Full=S-norcoclaurine synthase 1 {ECO:0000313|EMBL:PKU73227.1};	Iron/ascorbate family oxidoreductases	GO:0050474,(S)-norcoclaurine synthase activity; GO:0046872,metal ion binding; GO:0016491,oxidoreductase activity; GO:0009820,alkaloid metabolic process	PF14226.6:non-haem dioxygenase in morphine synthesis N-terminal
gene-LOC110092339	82	101	58	90	127	157	NW_021319178.1	2168458	2169133	+	LOC110092339	--	K13448 calcium-binding protein CML | (RefSeq) probable calcium-binding protein CML36 (A)	ko04626: Plant-pathogen interaction	probable calcium-binding protein CML36, partial [Dendrobium catenatum]	RecName: Full=Probable calcium-binding protein CML36; AltName: Full=Calmodulin-like protein 36;	SubName: Full=Putative calcium-binding protein CML36 {ECO:0000313|EMBL:PKU76412.1};	Calmodulin and related proteins (EF-Hand superfamily)	GO:0005886,plasma membrane; GO:0005509,calcium ion binding; GO:0050832,defense response to fungus	PF00036.32:EF hand
gene-LOC110092340	115	119	113	123	112	208	NW_021319405.1	21754	29592	-	LOC110092340	--	K01102 pyruvate dehydrogenase phosphatase [EC:3.1.3.43] | (RefSeq) probable protein phosphatase 2C 4 (A)	--	probable protein phosphatase 2C 26 [Dendrobium catenatum]	RecName: Full=Probable protein phosphatase 2C 26; Short=OsPP2C26; EC=3.1.3.16;	SubName: Full=Uncharacterized protein {ECO:0000313|EMBL:PKA53964.1};	Protein phosphatase 2C/pyruvate dehydrogenase (lipoamide) phosphatase	GO:0005886,plasma membrane; GO:0046872,metal ion binding; GO:0005543,phospholipid binding; GO:0004722,protein serine/threonine phosphatase activity; GO:0010074,maintenance of meristem identity; GO:0009933,meristem structural organization; GO:0006355,regulation of transcription, DNA-templated; GO:0009826,unidimensional cell growth	PF00481.21:Protein phosphatase 2C
gene-LOC110092341	449	430	552	431	481	385	NW_021319405.1	690927	692485	+	LOC110092341	--	K04505 presenilin 1 [EC:3.4.23.-] | (RefSeq) presenilin-like protein At2g29900 (A)	--	presenilin-like protein At2g29900 [Dendrobium catenatum]	RecName: Full=Presenilin-like protein At2g29900;	SubName: Full=Presenilin-like protein {ECO:0000313|EMBL:PKU73243.1};	Presenilin	GO:0005789,endoplasmic reticulum membrane; GO:0000139,Golgi membrane; GO:0005798,Golgi-associated vesicle; GO:0005887,integral component of plasma membrane; GO:0043231,intracellular membrane-bounded organelle; GO:0005634,nucleus; GO:0004190,aspartic-type endopeptidase activity; GO:0004175,endopeptidase activity; GO:0007219,Notch signaling pathway; GO:0016485,protein processing	PF01080.17:Presenilin
gene-LOC110092342	156	143	175	154	187	102	NW_021319405.1	722558	724446	-	LOC110092342	--	K17964 leucine-rich PPR motif-containing protein, mitochondrial | (RefSeq) hypothetical protein (A)	--	pentatricopeptide repeat-containing protein At1g74900, mitochondrial [Dendrobium catenatum]	RecName: Full=Pentatricopeptide repeat-containing protein At1g74900, mitochondrial; AltName: Full=Protein ORGANELLE TRANSCRIPT PROCESSING DEFECT 43; Flags: Precursor;	SubName: Full=Pentatricopeptide repeat-containing protein {ECO:0000313|EMBL:PKU73246.1};	FOG: PPR repeat	GO:0043231,intracellular membrane-bounded organelle; GO:0005739,mitochondrion; GO:0004519,endonuclease activity; GO:0003723,RNA binding; GO:0009451,RNA modification; GO:0008380,RNA splicing	PF13041.6:PPR repeat family
gene-LOC110092343	887	640	899	556	942	548	NW_021319405.1	560850	563051	-	LOC110092343	--	K19891 glucan endo-1,3-beta-glucosidase 1/2/3 [EC:3.2.1.39] | (RefSeq) hypothetical protein (A)	ko00500: Starch and sucrose metabolism	glucan endo-1,3-beta-glucosidase 11-like [Dendrobium catenatum]	RecName: Full=Glucan endo-1,3-beta-glucosidase 11; EC=3.2.1.39; AltName: Full=(1->3)-beta-glucan endohydrolase 11; Short=(1->3)-beta-glucanase 11; AltName: Full=Beta-1,3-endoglucanase 11; Short=Beta-1,3-glucanase 11; Flags: Precursor;	SubName: Full=Glucan endo-1,3-beta-glucosidase 11 {ECO:0000313|EMBL:PKU73239.1};	--	GO:0031225,anchored component of membrane; GO:0046658,anchored component of plasma membrane; GO:0005576,extracellular region; GO:0009505,plant-type cell wall; GO:0005886,plasma membrane; GO:0042973,glucan endo-1,3-beta-D-glucosidase activity; GO:0030247,polysaccharide binding; GO:0005975,carbohydrate metabolic process; GO:0007154,cell communication; GO:0071555,cell wall organization; GO:0006952,d…	PF00332.18:Glycosyl hydrolases family 17
gene-LOC110092345	178	186	235	225	279	299	NW_021319862.1	2449517	2454165	-	LOC110092345	--	K21594 translation factor GUF1, mitochondrial [EC:3.6.5.-] | (RefSeq) GTP-binding protein lepa (A)	--	COBW domain-containing protein 3-like [Dendrobium catenatum]	--	SubName: Full=Uncharacterized protein {ECO:0000313|EnsemblPlants:GSMUA_Achr6P01320_001};	Cobalamin synthesis protein	--	PF02492.19:CobW/HypB/UreG, nucleotide-binding domain
gene-LOC110092346	5962	4916	7446	4891	6153	5707	NW_021319862.1	2324347	2328523	-	LOC110092346	--	--	--	uncharacterized protein LOC110092346 [Dendrobium catenatum]	--	SubName: Full=Uncharacterized protein {ECO:0000313|EMBL:PKU67103.1};	--	--	--
gene-LOC110092347	1163	1067	1286	1062	1324	1205	NW_021319862.1	2335023	2337364	+	LOC110092347	--	K17893 ubiquinol oxidase [EC:1.10.3.11] | (RefSeq) ubiquinol oxidase 1b, mitochondrial-like (A)	--	ubiquinol oxidase 1b, mitochondrial-like [Dendrobium catenatum]	RecName: Full=Ubiquinol oxidase 1a, mitochondrial; EC=1.10.3.11 {ECO:0000269|PubMed:9554960}; AltName: Full=Alternative oxidase 1a; Flags: Precursor;	SubName: Full=Ubiquinol oxidase 1a, mitochondrial {ECO:0000313|EMBL:PKU67104.1};	--	GO:0016021,integral component of membrane; GO:0005743,mitochondrial inner membrane; GO:0005739,mitochondrion; GO:0070469,respiratory chain; GO:0009916,alternative oxidase activity; GO:0046872,metal ion binding; GO:0102721,ubiquinol:oxygen oxidoreductase activity; GO:0045333,cellular respiration; GO:0031930,mitochondria-nucleus signaling pathway; GO:0009409,response to cold	PF01786.17:Alternative oxidase
gene-LOC110092349	72	112	68	132	237	350	NW_021320019.1	2163547	2164403	-	LOC110092349	--	--	--	hypothetical protein MA16_Dca004595 [Dendrobium catenatum]	RecName: Full=Universal stress protein PHOS32 {ECO:0000303|PubMed:12644671}; AltName: Full=Phosphorylated protein of 32 kDa {ECO:0000303|PubMed:18285339}; Short=AtPHOS32 {ECO:0000303|PubMed:18285339}; Flags: Precursor;	SubName: Full=Uncharacterized protein {ECO:0000313|EMBL:PKU64980.1};	--	GO:0009507,chloroplast; GO:0005829,cytosol; GO:0005634,nucleus; GO:0005886,plasma membrane; GO:0005524,ATP binding; GO:0002238,response to molecule of fungal origin; GO:0006950,response to stress	PF00582.26:Universal stress protein family
gene-LOC110092350	2158	2325	2357	2462	2975	2122	NW_021318851.1	398019	426772	-	LOC110092350	--	K03267 peptide chain release factor subunit 3 | (RefSeq) eukaryotic peptide chain release factor GTP-binding subunit ERF3A-like (A)	ko03015: mRNA surveillance pathway	eukaryotic peptide chain release factor GTP-binding subunit ERF3A-like [Dendrobium catenatum]	RecName: Full=Elongation factor 1-alpha C; Short=EF-1-alpha C;	SubName: Full=Elongation factor 1-alpha C {ECO:0000313|EMBL:PKU82186.1};	Polypeptide release factor 3	GO:0005737,cytoplasm; GO:0005525,GTP binding; GO:0003924,GTPase activity; GO:0003746,translation elongation factor activity	PF00009.27:Elongation factor Tu GTP binding domain
gene-LOC110092351	36	47	68	132	84	111	NW_021318851.1	133789	145803	+	LOC110092351	--	--	--	immune-associated nucleotide-binding protein 9-like [Dendrobium catenatum]	RecName: Full=Immune-associated nucleotide-binding protein 9 {ECO:0000303|PubMed:17723251}; Short=AtIAN9 {ECO:0000303|PubMed:17723251}; AltName: Full=AIG1-like protein {ECO:0000305};	SubName: Full=Uncharacterized protein {ECO:0000313|EMBL:PKU65536.1};	--	GO:0005525,GTP binding	PF04548.16:AIG1 family
gene-LOC110092352	132	145	144	20	52	24	NW_021318851.1	351816	357533	-	LOC110092352	--	K14493 gibberellin receptor GID1 [EC:3.-.-.-] | (RefSeq) gibberellin receptor GID1B-like (A)	ko04075: Plant hormone signal transduction	probable carboxylesterase 18 [Dendrobium catenatum]	RecName: Full=Probable carboxylesterase 18; AltName: Full=AtCXE18; EC=3.1.1.1;	SubName: Full=Putative carboxylesterase 18 {ECO:0000313|EMBL:PKU82183.1};	Arylacetamide deacetylase	GO:0052689,carboxylic ester hydrolase activity; GO:0009056,catabolic process; GO:0009860,pollen tube growth	PF07859.13:alpha/beta hydrolase fold
gene-LOC110092353	3731	3584	4358	2439	3200	2800	NW_021318851.1	286951	295416	+	LOC110092353	--	K14486 auxin response factor | (RefSeq) auxin response factor 7-like (A)	ko04075: Plant hormone signal transduction	auxin response factor 7-like [Dendrobium catenatum]	RecName: Full=Auxin response factor 7;	SubName: Full=Auxin response factor 7 {ECO:0000313|EMBL:PKU82180.1};	--	GO:0005634,nucleus; GO:0003677,DNA binding; GO:0009734,auxin-activated signaling pathway; GO:0006355,regulation of transcription, DNA-templated; GO:0006351,transcription, DNA-templated	PF06507.13:Auxin response factor
gene-LOC110092355	2	19	12	36	65	48	NW_021318851.1	206760	220333	+	LOC110092355	--	--	--	immune-associated nucleotide-binding protein 9-like [Dendrobium catenatum]	RecName: Full=Immune-associated nucleotide-binding protein 9 {ECO:0000303|PubMed:17723251}; Short=AtIAN9 {ECO:0000303|PubMed:17723251}; AltName: Full=AIG1-like protein {ECO:0000305};	SubName: Full=Protein AIG1 {ECO:0000313|EMBL:PKU82178.1};	--	GO:0005525,GTP binding	PF04548.16:AIG1 family
gene-LOC110092357	0	0	0	2	0	6	NW_021318851.1	153587	168544	+	LOC110092357	--	--	--	immune-associated nucleotide-binding protein 9-like [Dendrobium catenatum]	RecName: Full=Immune-associated nucleotide-binding protein 9 {ECO:0000303|PubMed:17723251}; Short=AtIAN9 {ECO:0000303|PubMed:17723251}; AltName: Full=AIG1-like protein {ECO:0000305};	SubName: Full=Protein AIG1 {ECO:0000313|EMBL:PKU83700.1};	--	GO:0005525,GTP binding	PF04548.16:AIG1 family
gene-LOC110092358	304	493	369	694	531	559	NW_021318851.1	317123	343626	-	LOC110092358	--	K12836 splicing factor U2AF 35 kDa subunit | (RefSeq) splicing factor U2af small subunit B-like (A)	ko03040: Spliceosome	zinc finger CCCH domain-containing protein 5 isoform X1 [Dendrobium catenatum]	RecName: Full=Zinc finger CCCH domain-containing protein 5; Short=AtC3H5;	SubName: Full=Zinc finger CCCH domain-containing protein 5 {ECO:0000313|EMBL:PKU82182.1};	U2 snRNP splicing factor, small subunit, and related proteins	GO:0005681,spliceosomal complex; GO:0089701,U2AF; GO:0003677,DNA binding; GO:0046872,metal ion binding; GO:0030628,pre-mRNA 3'-splice site binding; GO:0000398,mRNA splicing, via spliceosome	PF00642.24:Zinc finger C-x8-C-x5-C-x3-H type (and similar)
gene-LOC110092359	410	553	446	512	676	593	NW_021318851.1	390505	396768	+	LOC110092359	--	K22418 11beta/17beta-hydroxysteroid dehydrogenase [EC:1.1.1.146 1.1.1.-] | (RefSeq) 11-beta-hydroxysteroid dehydrogenase-like 4A (A)	--	NADPH-dependent pterin aldehyde reductase [Dendrobium catenatum]	RecName: Full=NADPH-dependent pterin aldehyde reductase {ECO:0000303|PubMed:17550420}; EC=1.1.1.- {ECO:0000305|PubMed:17550420};	SubName: Full=Short-chain type dehydrogenase/reductase {ECO:0000313|EMBL:PKU82185.1};	Reductases with broad range of substrate specificities	GO:0005829,cytosol; GO:0016616,oxidoreductase activity, acting on the CH-OH group of donors, NAD or NADP as acceptor; GO:0006760,folic acid-containing compound metabolic process	PF00106.25:short chain dehydrogenase
gene-LOC110092360	828	921	894	1405	2221	1391	NW_021318851.1	379855	389940	-	LOC110092360	--	K12831 splicing factor 3B subunit 4 | (RefSeq) protein HSH49 isoform X1 (A)	ko03040: Spliceosome	protein HSH49 isoform X1 [Dendrobium catenatum]	RecName: Full=Splicing factor U2af large subunit A; AltName: Full=NpU2AF65a; AltName: Full=U2 auxiliary factor 65 kDa subunit A; AltName: Full=U2 small nuclear ribonucleoprotein auxiliary factor large subunit A; Short=U2 snRNP auxiliary factor large subunit A;	SubName: Full=Splicing factor U2af large subunit A {ECO:0000313|EMBL:PKU82184.1};	Splicing factor 3b, subunit 4	GO:0005634,nucleus; GO:0003723,RNA binding; GO:0006397,mRNA processing; GO:0008380,RNA splicing	PF00076.22:RNA recognition motif. (a.k.a. RRM, RBD, or RNP domain)
gene-LOC110092361	24	2	36	0	0	0	NW_021318851.1	224441	228431	-	LOC110092361	--	K14638 solute carrier family 15 (peptide/histidine transporter), member 3/4 | (RefSeq) protein NRT1/ PTR FAMILY 4.5-like (A)	--	protein NRT1/ PTR FAMILY 4.4-like [Dendrobium catenatum]	RecName: Full=Protein NRT1/ PTR FAMILY 4.3; Short=AtNPF4.3; AltName: Full=Nitrate transporter 1.14;	SubName: Full=Putative peptide/nitrate transporter {ECO:0000313|EMBL:PKU82179.1};	H+/oligopeptide symporter	GO:0016021,integral component of membrane; GO:0005886,plasma membrane; GO:0022857,transmembrane transporter activity; GO:0006857,oligopeptide transport; GO:0009624,response to nematode	PF00854.21:POT family
gene-LOC110092362	18	21	42	11	13	6	NW_021318851.1	340000	340796	-	LOC110092362	--	K14493 gibberellin receptor GID1 [EC:3.-.-.-] | (RefSeq) GID1a-2; hypothetical protein (A)	ko04075: Plant hormone signal transduction	probable carboxylesterase 18 [Dendrobium catenatum]	RecName: Full=Probable carboxylesterase 18; AltName: Full=AtCXE18; EC=3.1.1.1;	SubName: Full=Putative carboxylesterase 18 {ECO:0000313|EMBL:PKU82183.1};	Arylacetamide deacetylase	GO:0052689,carboxylic ester hydrolase activity; GO:0009056,catabolic process; GO:0009860,pollen tube growth	PF07859.13:alpha/beta hydrolase fold
gene-LOC110092363	391	327	541	781	677	452	NW_021318851.1	448851	453939	-	LOC110092363	--	--	--	uncharacterized protein LOC110092363 isoform X1 [Dendrobium catenatum]	--	SubName: Full=Uncharacterized protein {ECO:0000313|EMBL:PKU82188.1};	--	--	PF04906.13:Tweety
gene-LOC110092364	67	50	67	73	62	26	NW_021318851.1	303760	311558	+	LOC110092364	--	K22262 WD repeat and FYVE domain-containing protein 3 | (RefSeq) protein SPIRRIG (A)	--	putative pentatricopeptide repeat-containing protein At5g08490 [Dendrobium catenatum]	RecName: Full=Putative pentatricopeptide repeat-containing protein At5g08490;	SubName: Full=Pentatricopeptide repeat-containing protein {ECO:0000313|EMBL:PKU82181.1};	FOG: PPR repeat	GO:0005739,mitochondrion; GO:0004519,endonuclease activity; GO:0003723,RNA binding; GO:0080156,mitochondrial mRNA modification; GO:0009737,response to abscisic acid; GO:0009414,response to water deprivation	PF13041.6:PPR repeat family
gene-LOC110092367	680	573	703	317	457	340	NW_021319083.1	22753771	22787350	-	LOC110092367	--	--	--	protein NETWORKED 1D-like [Dendrobium catenatum]	RecName: Full=Protein NETWORKED 1C {ECO:0000303|PubMed:22840520};	SubName: Full=Uncharacterized protein {ECO:0000313|EMBL:PKU79386.1};	--	GO:0005886,plasma membrane; GO:0003779,actin binding	PF07765.12:KIP1-like protein
gene-LOC110092368	44	26	32	36	66	24	NW_021319083.1	22798801	22803208	+	LOC110092368	--	K01968 3-methylcrotonyl-CoA carboxylase alpha subunit [EC:6.4.1.4] | (RefSeq) LOW QUALITY PROTEIN: methylcrotonoyl-CoA carboxylase subunit alpha, mitochondrial-like (A)	ko00280: Valine, leucine and isoleucine degradation	serine/threonine-protein kinase HT1-like isoform X1 [Dendrobium catenatum]	RecName: Full=Serine/threonine-protein kinase STY13 {ECO:0000305}; EC=2.7.11.1 {ECO:0000269|PubMed:16429265}; AltName: Full=AtSTYPK {ECO:0000303|PubMed:17291444}; AltName: Full=Serine/threonine/tyrosine-protein kinase 13 {ECO:0000303|PubMed:16429265};	SubName: Full=Serine/threonine-protein kinase HT1 {ECO:0000313|EMBL:PKU79387.1};	Tyrosine kinase specific for activated (GTP-bound) p21cdc42Hs	GO:0005622,intracellular; GO:0005886,plasma membrane; GO:0005524,ATP binding; GO:0004672,protein kinase activity; GO:0004674,protein serine/threonine kinase activity; GO:0004712,protein serine/threonine/tyrosine kinase activity; GO:0004713,protein tyrosine kinase activity; GO:0004871,NA; GO:0035556,intracellular signal transduction; GO:0006468,protein phosphorylation	PF07714.17:Protein tyrosine kinase
gene-LOC110092369	57	69	59	109	117	147	NW_021319083.1	22822875	22833236	-	LOC110092369	--	--	--	hypothetical protein MA16_Dca000734 [Dendrobium catenatum]	--	SubName: Full=Uncharacterized protein {ECO:0000313|EMBL:PKU79389.1};	--	--	--
gene-LOC110092373	20	26	12	18	21	21	NW_021319083.1	22639706	22643978	+	LOC110092373	--	K18108 (-)-alpha-terpineol synthase [EC:4.2.3.111] | (RefSeq) (-)-alpha-terpineol synthase (A)	ko00902: Monoterpenoid biosynthesis	Myrcene synthase, chloroplastic [Dendrobium catenatum]	RecName: Full=Myrcene synthase, chloroplastic; EC=4.2.3.15; Flags: Precursor;	SubName: Full=Myrcene synthase, chloroplastic {ECO:0000313|EMBL:PKU79379.1};	--	GO:0009507,chloroplast; GO:0000287,magnesium ion binding; GO:0050551,myrcene synthase activity; GO:0008152,metabolic process	PF03936.16:Terpene synthase family, metal binding domain
gene-LOC110092374	2	2	3	13	39	8	NW_021319083.1	22627127	22630969	+	LOC110092374	--	K18108 (-)-alpha-terpineol synthase [EC:4.2.3.111] | (RefSeq) (-)-alpha-terpineol synthase-like (A)	ko00902: Monoterpenoid biosynthesis	Alpha-terpineol synthase, chloroplastic [Dendrobium catenatum]	RecName: Full=Alpha-terpineol synthase, chloroplastic; Short=Mg17; EC=4.2.3.111; EC=4.2.3.112; Flags: Precursor;	SubName: Full=Alpha-terpineol synthase, chloroplastic {ECO:0000313|EMBL:PKU79378.1};	--	GO:0009570,chloroplast stroma; GO:0000287,magnesium ion binding; GO:0010333,terpene synthase activity; GO:0033383,geranyl diphosphate metabolic process; GO:0043693,monoterpene biosynthetic process; GO:0016114,terpenoid biosynthetic process	PF03936.16:Terpene synthase family, metal binding domain
gene-LOC110092375	806	950	1018	1746	2297	1506	NW_021319083.1	22565202	22601279	+	LOC110092375	--	--	--	uncharacterized protein LOC110092375 isoform X1 [Dendrobium catenatum]	RecName: Full=P-loop NTPase domain-containing protein LPA1 homolog {ECO:0000305}; AltName: Full=Protein LOW PHYTIC ACID 1 homolog {ECO:0000305};	SubName: Full=Uncharacterized protein {ECO:0000313|EMBL:PKU79376.1};	--	--	PF13238.6:AAA domain
gene-LOC110092376	345	428	393	321	448	295	NW_021319083.1	22499578	22505374	+	LOC110092376	--	K13464 jasmonate ZIM domain-containing protein | (RefSeq) protein TIFY 3B-like (A)	ko04075: Plant hormone signal transduction	protein TIFY 4B-like isoform X1 [Dendrobium catenatum]	RecName: Full=Protein TIFY 4B; AltName: Full=Protein PEAPOD 2;	SubName: Full=Protein TIFY 4B {ECO:0000313|EMBL:PKU79372.1};	--	GO:0005634,nucleus; GO:0003714,transcription corepressor activity; GO:0048366,leaf development; GO:1903507,negative regulation of nucleic acid-templated transcription; GO:0031347,regulation of defense response; GO:2000022,regulation of jasmonic acid mediated signaling pathway; GO:0009611,response to wounding	PF06200.14:tify domain
gene-LOC110092377	56	123	78	184	140	149	NW_021319083.1	22602281	22609364	-	LOC110092377	--	K08967 1,2-dihydroxy-3-keto-5-methylthiopentene dioxygenase [EC:1.13.11.53 1.13.11.54] | (RefSeq) 1,2-dihydroxy-3-keto-5-methylthiopentene dioxygenase 2-like isoform X1 (A)	ko00270: Cysteine and methionine metabolism	1,2-dihydroxy-3-keto-5-methylthiopentene dioxygenase 2-like isoform X1 [Dendrobium catenatum]	RecName: Full=1,2-dihydroxy-3-keto-5-methylthiopentene dioxygenase 2 {ECO:0000255|HAMAP-Rule:MF_03154}; EC=1.13.11.54 {ECO:0000255|HAMAP-Rule:MF_03154}; AltName: Full=Acireductone dioxygenase (Fe(2+)-requiring) 2 {ECO:0000255|HAMAP-Rule:MF_03154}; Short=ARD 2 {ECO:0000255|HAMAP-Rule:MF_03154}; Short=Fe-ARD 2 {ECO:0000255|HAMAP-Rule:MF_03154}; AltName: Full=Submergence-induced protein 2A;	SubName: Full=1,2-dihydroxy-3-keto-5-methylthiopentene dioxygenase 2 {ECO:0000313|EMBL:PKU79377.1};	Uncharacterized conserved protein, contains double-stranded beta-helix domain	GO:0005737,cytoplasm; GO:0005634,nucleus; GO:0010309,acireductone dioxygenase [iron(II)-requiring] activity; GO:0046872,metal ion binding; GO:0019509,L-methionine salvage from methylthioadenosine; GO:0006555,methionine metabolic process	PF03079.14:ARD/ARD' family
gene-LOC110092378	1154	1003	1282	900	1185	494	NW_021319083.1	22738300	22739022	-	LOC110092378	--	K13496 UDP-glucosyl transferase 73C [EC:2.4.1.-] | (RefSeq) scopoletin glucosyltransferase (A)	ko00908: Zeatin biosynthesis	hypothetical protein MA16_Dca000730 [Dendrobium catenatum]	--	SubName: Full=Uncharacterized protein {ECO:0000313|EMBL:PKU79385.1};	--	--	--
gene-LOC110092380	133	178	200	57	108	79	NW_021319083.1	22533263	22537440	+	LOC110092380	--	K17499 protein phosphatase 1G [EC:3.1.3.16] | (RefSeq) uncharacterized protein LOC105913857 (A)	--	BI1-like protein [Dendrobium catenatum]	RecName: Full=Protein LIFEGUARD 4 {ECO:0000303|PubMed:23888068}; Short=AtLFG4 {ECO:0000303|PubMed:23888068};	SubName: Full=BI1-like protein {ECO:0000313|EMBL:PKU79374.1};	N-methyl-D-aspartate receptor glutamate-binding subunit	GO:0016021,integral component of membrane	PF01027.20:Inhibitor of apoptosis-promoting Bax1
gene-LOC110092382	8	3	3	5	2	2	NW_021319083.1	22653138	22656592	-	LOC110092382	--	K18108 (-)-alpha-terpineol synthase [EC:4.2.3.111] | (RefSeq) (-)-alpha-terpineol synthase-like (A)	ko00902: Monoterpenoid biosynthesis	terpene synthase 10-like [Dendrobium catenatum]	RecName: Full=Myrcene synthase, chloroplastic; EC=4.2.3.15; Flags: Precursor;	SubName: Full=Myrcene synthase, chloroplastic {ECO:0000313|EMBL:PKU79380.1};	--	GO:0009507,chloroplast; GO:0000287,magnesium ion binding; GO:0050551,myrcene synthase activity; GO:0008152,metabolic process	PF03936.16:Terpene synthase family, metal binding domain
gene-LOC110092383	453	562	546	798	1101	711	NW_021319083.1	22548549	22551491	+	LOC110092383	--	--	--	uncharacterized protein LOC110092383 [Dendrobium catenatum]	RecName: Full=Protein IQ-DOMAIN 14;	SubName: Full=Protein IQ-DOMAIN 14 {ECO:0000313|EMBL:PKU79375.1};	--	--	PF13178.6:Protein of unknown function (DUF4005)
gene-LOC110092384	190	164	224	63	109	52	NW_021319083.1	22817240	22820720	+	LOC110092384	--	K06180 23S rRNA pseudouridine1911/1915/1917 synthase [EC:5.4.99.23] | (RefSeq) pentatricopeptide repeat-containing protein At1g20230 isoform X1 (A)	--	pentatricopeptide repeat-containing protein At3g22690 [Dendrobium catenatum]	RecName: Full=Pentatricopeptide repeat-containing protein At3g22690;	SubName: Full=Pentatricopeptide repeat-containing protein {ECO:0000313|EMBL:PKU79388.1};	FOG: PPR repeat	GO:0043231,intracellular membrane-bounded organelle; GO:0004519,endonuclease activity; GO:0003723,RNA binding; GO:0008270,zinc ion binding; GO:0009451,RNA modification	PF13041.6:PPR repeat family
gene-LOC110092385	0	0	0	39	35	21	NW_021319083.1	22743232	22749877	+	LOC110092385	--	K18108 (-)-alpha-terpineol synthase [EC:4.2.3.111] | (RefSeq) (-)-alpha-terpineol synthase (A)	ko00902: Monoterpenoid biosynthesis	terpene synthase 10-like [Dendrobium catenatum]	RecName: Full=(-)-alpha-terpineol synthase; EC=4.2.3.111;	SubName: Full=Alpha-terpineol synthase, chloroplastic {ECO:0000313|EMBL:PKU79378.1};	--	GO:0000287,magnesium ion binding; GO:0010333,terpene synthase activity; GO:0016114,terpenoid biosynthetic process	PF03936.16:Terpene synthase family, metal binding domain
gene-LOC110092387	878	884	925	751	1133	696	NW_021319523.1	2630855	2653358	+	LOC110092387	--	K16297 serine carboxypeptidase-like clade II [EC:3.4.16.-] | (RefSeq) serine carboxypeptidase-like 27 (A)	--	serine carboxypeptidase-like 27 [Dendrobium catenatum]	RecName: Full=Serine carboxypeptidase-like 27; EC=3.4.16.-; Flags: Precursor;	SubName: Full=Serine carboxypeptidase-like 27 {ECO:0000313|EMBL:PKU71258.1};	Serine carboxypeptidases (lysosomal cathepsin A)	GO:0005576,extracellular region; GO:0005773,vacuole; GO:0004185,serine-type carboxypeptidase activity; GO:0051603,proteolysis involved in cellular protein catabolic process	PF00450.22:Serine carboxypeptidase
gene-LOC110092388	3	20	9	47	30	15	NW_021319523.1	2658211	2674047	-	LOC110092388	--	K12598 ATP-dependent RNA helicase DOB1 [EC:3.6.4.13] | (RefSeq) DExH-box ATP-dependent RNA helicase DExH10-like (A)	ko03018: RNA degradation	uncharacterized protein LOC110092388 [Dendrobium catenatum]	RecName: Full=Putative ribonuclease H protein At1g65750; EC=3.1.26.4;	SubName: Full=Ribonuclease H protein {ECO:0000313|EMBL:PKU86740.1};	FOG: Reverse transcriptase	GO:0046872,metal ion binding; GO:0003676,nucleic acid binding; GO:0004523,RNA-DNA hybrid ribonuclease activity	PF00078.27:Reverse transcriptase (RNA-dependent DNA polymerase)
gene-LOC110092389	462	511	498	270	530	572	NW_021320146.1	222855	224504	+	LOC110092389	--	K15121 solute carrier family 25, member 44 | (RefSeq) solute carrier family 25 member 44-like (A)	--	solute carrier family 25 member 44-like [Dendrobium catenatum]	RecName: Full=Probable S-adenosylmethionine carrier 2, chloroplastic; Flags: Precursor;	SubName: Full=Protein MITOFERRINLIKE 1, chloroplastic {ECO:0000313|EMBL:PKU63239.1};	Predicted mitochondrial carrier protein	GO:0009941,chloroplast envelope; GO:0031969,chloroplast membrane; GO:0016021,integral component of membrane; GO:0005743,mitochondrial inner membrane; GO:0000095,S-adenosyl-L-methionine transmembrane transporter activity; GO:0006839,mitochondrial transport	PF00153.27:Mitochondrial carrier protein
gene-LOC110092390	613	478	746	627	841	488	NW_021319178.1	1994774	1997758	-	LOC110092390	--	K11886 proteasome component ECM29 | (RefSeq) proteasome-associated protein ECM29 homolog (A)	--	blue copper protein [Dendrobium catenatum]	RecName: Full=Early nodulin-like protein 2; AltName: Full=Phytocyanin-like protein; Flags: Precursor;	SubName: Full=Early nodulin-like protein 2 {ECO:0000313|EMBL:PKU76405.1};	--	GO:0031225,anchored component of membrane; GO:0046658,anchored component of plasma membrane; GO:0048046,apoplast; GO:0009507,chloroplast; GO:0005886,plasma membrane; GO:0005773,vacuole; GO:0009055,electron transfer activity	PF02298.17:Plastocyanin-like domain
gene-LOC110092392	453	416	594	645	891	499	NW_021319523.1	2578266	2582406	+	LOC110092392	--	K16297 serine carboxypeptidase-like clade II [EC:3.4.16.-] | (RefSeq) serine carboxypeptidase-like 27 (A)	--	serine carboxypeptidase-like 27 [Dendrobium catenatum]	RecName: Full=Serine carboxypeptidase-like 27; EC=3.4.16.-; Flags: Precursor;	SubName: Full=Serine carboxypeptidase-like 27 {ECO:0000313|EMBL:PKU71255.1};	Serine carboxypeptidases (lysosomal cathepsin A)	GO:0005576,extracellular region; GO:0005773,vacuole; GO:0004185,serine-type carboxypeptidase activity; GO:0051603,proteolysis involved in cellular protein catabolic process	PF00450.22:Serine carboxypeptidase
gene-LOC110092393	447	335	499	364	484	189	NW_021319523.1	2511441	2534093	+	LOC110092393	--	--	--	hypothetical protein MA16_Dca007250 [Dendrobium catenatum]	--	SubName: Full=Uncharacterized protein {ECO:0000313|EMBL:PKU71253.1};	Uncharacterized conserved membrane protein	--	PF09786.9:Cytochrome B561, N terminal
gene-LOC110092394	468	509	640	709	952	730	NW_021319132.1	670069	732311	+	LOC110092394	--	K16302 metal transporter CNNM | (RefSeq) probable methyltransferase PMT28 (A)	--	putative methyltransferase PMT26 [Dendrobium catenatum]	RecName: Full=Probable methyltransferase PMT25; EC=2.1.1.-;	SubName: Full=Putative methyltransferase PMT26 {ECO:0000313|EMBL:PKU77618.1};	--	GO:0005737,cytoplasm; GO:0005768,endosome; GO:0005794,Golgi apparatus; GO:0000139,Golgi membrane; GO:0016021,integral component of membrane; GO:0009506,plasmodesma; GO:0005802,trans-Golgi network; GO:0008757,S-adenosylmethionine-dependent methyltransferase activity; GO:0032259,methylation	PF03141.16:Putative S-adenosyl-L-methionine-dependent methyltransferase
gene-LOC110092395	1985	2422	2892	1629	1269	1062	NW_021319132.1	771275	776417	-	LOC110092395	--	K15078 structure-specific endonuclease subunit SLX1 [EC:3.6.1.-] | (RefSeq) putative disease resistance protein RGA1 (A)	--	disease resistance protein RGA2-like isoform X1 [Dendrobium catenatum]	RecName: Full=Putative disease resistance RPP13-like protein 1;	SubName: Full=Disease resistance RPP13-like protein 1 {ECO:0000313|EMBL:PKU77941.1};	Apoptotic ATPase	GO:0005886,plasma membrane; GO:0043531,ADP binding; GO:0005524,ATP binding; GO:0009626,plant-type hypersensitive response; GO:0007165,signal transduction	PF00931.22:NB-ARC domain
gene-LOC110092398	143	174	249	339	406	292	NW_021319529.1	1800248	1802522	-	LOC110092398	--	--	--	putative WEB family protein At1g65010, chloroplastic [Dendrobium catenatum]	RecName: Full=Putative WEB family protein At1g65010, chloroplastic; Flags: Precursor;	SubName: Full=WEB family protein {ECO:0000313|EMBL:PKU71120.1};	--	GO:0009507,chloroplast; GO:0005875,microtubule associated complex; GO:0000795,synaptonemal complex; GO:0007131,reciprocal meiotic recombination	PF05701.11:Weak chloroplast movement under blue light
gene-LOC110092399	811	723	970	419	620	276	NW_021319529.1	1753899	1759651	+	LOC110092399	--	K03319 divalent anion:Na+ symporter, DASS family | (RefSeq) LOW QUALITY PROTEIN: dicarboxylate transporter 2.1, chloroplastic-like (A)	--	dicarboxylate transporter 2.1, chloroplastic-like [Dendrobium catenatum]	RecName: Full=Dicarboxylate transporter 2.1, chloroplastic; AltName: Full=AtpDCT1; AltName: Full=Glutamate/malate translocator; Flags: Precursor;	SubName: Full=Dicarboxylate transporter 2.1, chloroplastic {ECO:0000313|EMBL:PKU71115.1};	--	GO:0009507,chloroplast; GO:0009941,chloroplast envelope; GO:0009706,chloroplast inner membrane; GO:0009534,chloroplast thylakoid; GO:0016021,integral component of membrane; GO:0016020,membrane; GO:0009536,plastid; GO:0005313,L-glutamate transmembrane transporter activity; GO:0015140,malate transmembrane transporter activity; GO:0015131,oxaloacetate transmembrane transporter activity; GO:0019676,a…	PF00939.19:Sodium:sulfate symporter transmembrane region
gene-LOC110092400	85	87	138	208	164	55	NW_021319529.1	1747127	1748012	+	LOC110092400	--	K22128 piezo-type mechanosensitive ion channel component 1/2 | (RefSeq) hypothetical protein (A)	--	blue copper protein-like [Dendrobium catenatum]	RecName: Full=Blue copper protein; Flags: Precursor;	SubName: Full=Blue copper protein {ECO:0000313|EMBL:PKU71114.1};	--	GO:0009055,electron transfer activity; GO:0046872,metal ion binding	PF02298.17:Plastocyanin-like domain
gene-LOC110092401	41	66	70	45	67	41	NW_021319529.1	1794620	1798538	-	LOC110092401	--	K15271 ATP-dependent DNA helicase HFM1/MER3 [EC:3.6.4.12] | (RefSeq) DExH-box ATP-dependent RNA helicase DExH17 (A)	--	pentatricopeptide repeat-containing protein At4g02750-like [Dendrobium catenatum]	RecName: Full=Pentatricopeptide repeat-containing protein At4g02750;	SubName: Full=Pentatricopeptide repeat-containing protein {ECO:0000313|EMBL:PKU71119.1};	FOG: PPR repeat	GO:0043231,intracellular membrane-bounded organelle; GO:0004519,endonuclease activity; GO:0003723,RNA binding; GO:0008270,zinc ion binding; GO:0009451,RNA modification	PF01535.20:PPR repeat
gene-LOC110092402	908	1197	1183	2474	2221	3064	NW_021319529.1	1791329	1794810	+	LOC110092402	--	K11253 histone H3 | (RefSeq) histone H3.3 (A)	--	hypothetical protein PHYPA_023132 [Physcomitrella patens]	RecName: Full=Histone H3.3;	RecName: Full=Histone H3 {ECO:0000256|RuleBase:RU004471};	Histones H3 and H4	GO:0000786,nucleosome; GO:0005634,nucleus; GO:0003677,DNA binding; GO:0046982,protein heterodimerization activity	PF00125.24:Core histone H2A/H2B/H3/H4
gene-LOC110092403	458	509	547	746	822	566	NW_021319529.1	1683085	1730168	-	LOC110092403	--	K15627 tether containing UBX domain for GLUT4 | (RefSeq) plant UBX domain-containing protein 1 (A)	--	plant UBX domain-containing protein 1 [Dendrobium catenatum]	RecName: Full=Plant UBX domain-containing protein 1 {ECO:0000303|Ref.7}; Short=PUX1 {ECO:0000303|Ref.7}; AltName: Full=CDC48-interacting UBX-domain protein 1 {ECO:0000312|EMBL:AAS78923.1};	SubName: Full=Uncharacterized protein {ECO:0000313|EMBL:PKA61360.1};	Predicted ubiquitin regulatory protein	GO:0005737,cytoplasm; GO:0051117,ATPase binding; GO:0035265,organ growth; GO:0043241,NA	PF00789.20:UBX domain
gene-LOC110092404	5614	6162	6682	7104	10234	10900	NW_021319529.1	1775474	1776889	+	LOC110092404	--	K09338 homeobox-leucine zipper protein | (RefSeq) homeobox-leucine zipper protein HOX20-like (A)	--	homeobox-leucine zipper protein HOX20-like [Dendrobium catenatum]	RecName: Full=Homeobox-leucine zipper protein HOX20; AltName: Full=HD-ZIP protein HOX20; AltName: Full=Homeodomain transcription factor HOX20; AltName: Full=OsHox20;	SubName: Full=Homeobox-leucine zipper protein HOX20 {ECO:0000313|EMBL:PKU71116.1};	Transcription factor HEX, contains HOX and HALZ domains	GO:0005634,nucleus; GO:0003700,DNA-binding transcription factor activity; GO:0043565,sequence-specific DNA binding; GO:0006351,transcription, DNA-templated	PF00046.29:Homeodomain
gene-LOC110092405	19	19	12	9	1	0	NW_021318534.1	2153976	2155858	-	LOC110092405	--	--	--	--	--	--	--	--	--
gene-LOC110092406	48	68	95	408	348	240	NW_021318534.1	2293896	2297613	+	LOC110092406	--	K14638 solute carrier family 15 (peptide/histidine transporter), member 3/4 | (RefSeq) protein NRT1/ PTR FAMILY 5.8-like (A)	--	protein NRT1/ PTR FAMILY 5.8-like [Dendrobium catenatum]	RecName: Full=Protein NRT1/ PTR FAMILY 5.8; Short=AtNPF5.8;	SubName: Full=Putative peptide/nitrate transporter {ECO:0000313|EMBL:PKU87146.1};	H+/oligopeptide symporter	GO:0016021,integral component of membrane; GO:0022857,transmembrane transporter activity; GO:0009624,response to nematode	PF00854.21:POT family
gene-LOC110092408	15	33	8	24	51	12	NW_021318534.1	1962935	1965199	+	LOC110092408	--	K14638 solute carrier family 15 (peptide/histidine transporter), member 3/4 | (RefSeq) protein NRT1/ PTR FAMILY 5.10-like isoform X1 (A)	--	protein NRT1/ PTR FAMILY 5.10-like isoform X1 [Dendrobium catenatum]	RecName: Full=Protein NRT1/ PTR FAMILY 5.10; Short=AtNPF5.10;	SubName: Full=Putative peptide/nitrate transporter {ECO:0000313|EMBL:PKU68526.1};	H+/oligopeptide symporter	GO:0016021,integral component of membrane; GO:0022857,transmembrane transporter activity; GO:0006857,oligopeptide transport	PF00854.21:POT family
gene-LOC110092409	205	220	274	36	55	28	NW_021318534.1	1868112	1869148	-	LOC110092409	--	K14496 abscisic acid receptor PYR/PYL family | (RefSeq) abscisic acid receptor PYL4-like (A)	ko04016: MAPK signaling pathway - plant; ko04075: Plant hormone signal transduction	abscisic acid receptor PYL4-like [Dendrobium catenatum]	RecName: Full=Abscisic acid receptor PYL4; AltName: Full=ABI1-binding protein 2; AltName: Full=PYR1-like protein 4; AltName: Full=Regulatory components of ABA receptor 10;	SubName: Full=Abscisic acid receptor PYL5 {ECO:0000313|EMBL:PKU87134.1};	--	GO:0005737,cytoplasm; GO:0005634,nucleus; GO:0005886,plasma membrane; GO:0010427,abscisic acid binding; GO:0042803,protein homodimerization activity; GO:0004864,protein phosphatase inhibitor activity; GO:0004872,NA; GO:0009738,abscisic acid-activated signaling pathway	PF10604.9:Polyketide cyclase / dehydrase and lipid transport
gene-LOC110092410	332	317	493	330	397	234	NW_021318534.1	2166275	2216219	-	LOC110092410	--	K10084 ER degradation enhancer, mannosidase alpha-like 1 | (RefSeq) alpha-mannosidase I MNS5 isoform X1 (A)	ko04141: Protein processing in endoplasmic reticulum	alpha-mannosidase I MNS5 isoform X1 [Dendrobium catenatum]	RecName: Full=Alpha-mannosidase I MNS5; EC=3.2.1.- {ECO:0000269|PubMed:24737672};	SubName: Full=Putative alpha-mannosidase I MNS5 {ECO:0000313|EMBL:PKU87140.1};	Glycosyl hydrolase, family 47	GO:0005783,endoplasmic reticulum; GO:0005789,endoplasmic reticulum membrane; GO:0000139,Golgi membrane; GO:0016021,integral component of membrane; GO:0004559,alpha-mannosidase activity; GO:0005509,calcium ion binding; GO:0004571,mannosyl-oligosaccharide 1,2-alpha-mannosidase activity; GO:0006491,N-glycan processing; GO:0006486,protein glycosylation; GO:0030433,ubiquitin-dependent ERAD pathway	PF01532.20:Glycosyl hydrolase family 47
gene-LOC110092411	18	16	19	8	19	9	NW_021318534.1	2278604	2279999	+	LOC110092411	--	K07999 matrix metalloproteinase-20 (enamelysin) [EC:3.4.24.-] | (RefSeq) metalloendoproteinase 1-MMP-like (A)	--	metalloendoproteinase 2-MMP-like [Dendrobium catenatum]	RecName: Full=Metalloendoproteinase 2-MMP {ECO:0000303|PubMed:10574937}; Short=At2-MMP {ECO:0000303|PubMed:10574937}; EC=3.4.24.- {ECO:0000305}; Flags: Precursor;	SubName: Full=Metalloendoproteinase 1 {ECO:0000313|EMBL:PKU87144.1};	Gelatinase A and related matrix metalloproteases	GO:0031225,anchored component of membrane; GO:0031012,extracellular matrix; GO:0005886,plasma membrane; GO:0004222,metalloendopeptidase activity; GO:0008270,zinc ion binding; GO:0080186,developmental vegetative growth; GO:0007275,multicellular organism development; GO:1900056,negative regulation of leaf senescence; GO:2000028,regulation of photoperiodism, flowering; GO:0046686,response to cadmium…	PF00413.24:Matrixin
gene-LOC110092412	714	793	816	812	943	719	NW_021318534.1	2266307	2271598	+	LOC110092412	--	--	--	protein CREG1 [Dendrobium catenatum]	--	SubName: Full=Uncharacterized protein {ECO:0000313|EMBL:PKU87142.1};	Cellular repressor of transcription	--	PF13883.6:Pyridoxamine 5'-phosphate oxidase
gene-LOC110092413	117	97	150	114	144	108	NW_021318534.1	2321652	2339335	+	LOC110092413	--	K13430 serine/threonine-protein kinase PBS1 [EC:2.7.11.1] | (RefSeq) serine/threonine-protein kinase PBS1 (A)	ko04626: Plant-pathogen interaction	protein STRUBBELIG-RECEPTOR FAMILY 8 isoform X2 [Dendrobium catenatum]	RecName: Full=Protein STRUBBELIG-RECEPTOR FAMILY 8; AltName: Full=Leucine-rich repeat receptor kinase-like protein SRF8; Flags: Precursor;	SubName: Full=Protein STRUBBELIG-RECEPTOR FAMILY 8 {ECO:0000313|EMBL:PKU87148.1};	Serine/threonine protein kinase	GO:0016021,integral component of membrane; GO:0005886,plasma membrane; GO:0005524,ATP binding; GO:0004675,transmembrane receptor protein serine/threonine kinase activity; GO:0007166,cell surface receptor signaling pathway; GO:0006468,protein phosphorylation	PF07714.17:Protein tyrosine kinase
gene-LOC110092414	0	0	5	2	0	0	NW_021319178.1	2040128	2043575	-	LOC110092414	--	K14508 regulatory protein NPR1 | (RefSeq) BTB/POZ domain and ankyrin repeat-containing protein NPR5-like (A)	ko04075: Plant hormone signal transduction	BTB/POZ domain and ankyrin repeat-containing protein NPR5-like [Dendrobium catenatum]	RecName: Full=Regulatory protein NPR5; AltName: Full=BTB/POZ domain-containing protein NPR5; AltName: Full=Protein BLADE ON PETIOLE 2;	SubName: Full=Regulatory protein NPR5 {ECO:0000313|EMBL:PKU76407.1};	FOG: Ankyrin repeat	GO:0005737,cytoplasm; GO:0005634,nucleus; GO:0019005,SCF ubiquitin ligase complex; GO:0031625,ubiquitin protein ligase binding; GO:0010434,bract formation; GO:0010582,floral meristem determinacy; GO:0010227,floral organ abscission; GO:0048439,flower morphogenesis; GO:0009864,induced systemic resistance, jasmonic acid mediated signaling pathway; GO:0010254,nectary development; GO:0009944,polarity …	PF00651.31:BTB/POZ domain
gene-LOC110092415	108	139	96	105	167	155	NW_021318534.1	2342818	2346196	+	LOC110092415	--	--	--	uncharacterized protein LOC110092415 [Dendrobium catenatum]	--	SubName: Full=Uncharacterized protein {ECO:0000313|EMBL:PKU87149.1};	--	--	--
gene-LOC110092416	944	1572	801	1358	2241	1627	NW_021318534.1	2304901	2305914	+	LOC110092416	--	--	--	uncharacterized protein LOC110092416 [Dendrobium catenatum]	--	SubName: Full=Uncharacterized protein {ECO:0000313|EMBL:PKU87147.1};	--	--	PF06188.12:HrpE/YscL/FliH and V-type ATPase subunit E
gene-LOC110092417	22	26	29	58	47	64	NW_021318534.1	2002113	2004854	-	LOC110092417	--	K03320 ammonium transporter, Amt family | (RefSeq) ammonium transporter 3 member 1-like (A)	--	Ammonium transporter 3 member 1 [Dendrobium catenatum]	RecName: Full=Ammonium transporter 3 member 1; Short=OsAMT3;1;	SubName: Full=Ammonium transporter 3 member 1 {ECO:0000313|EMBL:PKU87138.1};	Ammonia permease	GO:0016021,integral component of membrane; GO:0008519,ammonium transmembrane transporter activity	PF00909.21:Ammonium Transporter Family
gene-LOC110092418	50	29	46	11	81	50	NW_021318491.1	406778	408402	+	LOC110092418	--	K19984 exocyst complex component 5 | (RefSeq) uncharacterized protein LOC112294431 (A)	--	formin-like protein 16 [Dendrobium catenatum]	RecName: Full=Formin-like protein 8; Short=AtFH8; Short=AtFORMIN-1; Flags: Precursor;	SubName: Full=Formin-like protein 8 {ECO:0000313|EMBL:PKU87824.1};	Rho GTPase effector BNI1 and related formins	GO:0005911,cell-cell junction; GO:0016021,integral component of membrane; GO:0005886,plasma membrane; GO:0003779,actin binding; GO:0051015,actin filament binding; GO:0005522,profilin binding; GO:0045010,actin nucleation; GO:0009932,cell tip growth	PF02181.23:Formin Homology 2 Domain
gene-LOC110092419	187	174	251	197	194	207	--	--	--	--	--	--	--	--
gene-LOC110092420	283	268	304	232	216	260	NW_021318491.1	348451	355601	-	LOC110092420	--	--	--	protein ALP1-like isoform X1 [Dendrobium catenatum]	RecName: Full=Protein ALP1-like {ECO:0000305}; EC=3.1.-.-;	SubName: Full=Uncharacterized protein {ECO:0000313|EMBL:PKU87820.1};	Predicted transposase	GO:0005634,nucleus; GO:0046872,metal ion binding; GO:0004518,nuclease activity	PF13359.6:DDE superfamily endonuclease
gene-LOC110092421	115	107	158	160	180	182	NW_021318491.1	329422	332859	+	LOC110092421	--	K03875 F-box and leucine-rich repeat protein 1 (S-phase kinase-associated protein 2) | (RefSeq) F-box protein SKP2A-like isoform X1 (A)	ko04120: Ubiquitin mediated proteolysis	F-box protein At5g67140 [Dendrobium catenatum]	RecName: Full=F-box protein At5g67140;	SubName: Full=F-box protein {ECO:0000313|EMBL:PKU87818.1};	Leucine rich repeat proteins, some proteins contain F-box	--	PF12937.7:F-box-like
gene-LOC110092422	8968	9463	10649	6807	9279	7591	NW_021318491.1	313309	325545	+	LOC110092422	--	K01845 glutamate-1-semialdehyde 2,1-aminomutase [EC:5.4.3.8] | (RefSeq) Glutamate-1-semialdehyde 2,1-aminomutase, chloroplastic (A)	ko00860: Porphyrin and chlorophyll metabolism	uncharacterized protein LOC110092422 isoform X1 [Dendrobium catenatum]	RecName: Full=Divinyl chlorophyllide a 8-vinyl-reductase, chloroplastic; EC=1.3.1.75 {ECO:0000269|PubMed:15632054, ECO:0000269|PubMed:17991629}; AltName: Full=Protein PALE-GREEN AND CHLOROPHYLL B REDUCED 2; Flags: Precursor;	SubName: Full=Divinyl chlorophyllide a 8-vinyl-reductase, chloroplastic {ECO:0000313|EMBL:PKA62553.1}; EC=1.1.1.216 {ECO:0000313|EMBL:PKA62553.1};	Predicted dehydrogenase	GO:0009507,chloroplast; GO:0009941,chloroplast envelope; GO:0009534,chloroplast thylakoid; GO:0016020,membrane; GO:0051744,3,8-divinyl protochlorophyllide a 8-vinyl reductase activity; GO:0033728,divinyl chlorophyllide a 8-vinyl-reductase activity; GO:0015995,chlorophyll biosynthetic process	PF13460.6:NAD(P)H-binding
gene-LOC110092423	1206	1286	1388	1696	2065	1069	NW_021319178.1	2422009	2435805	-	LOC110092423	--	K02734 20S proteasome subunit beta 4 [EC:3.4.25.1] | (RefSeq) proteasome subunit beta type-2-A-like (A)	ko03050: Proteasome	proteasome subunit beta type-2-A-like [Dendrobium catenatum]	RecName: Full=Proteasome subunit beta type-2-A; EC=3.4.25.1; AltName: Full=20S proteasome beta subunit D-1; AltName: Full=Proteasome component GB; AltName: Full=Proteasome subunit beta type-4;	SubName: Full=Proteasome subunit beta type-2-A {ECO:0000313|EMBL:PKU76424.1};	20S proteasome, regulatory subunit beta type PSMB2/PRE1	GO:0048046,apoplast; GO:0005829,cytosol; GO:0005634,nucleus; GO:0005886,plasma membrane; GO:0000502,proteasome complex; GO:0019774,proteasome core complex, beta-subunit complex; GO:0005774,vacuolar membrane; GO:0005773,vacuole; GO:0004298,threonine-type endopeptidase activity; GO:0051603,proteolysis involved in cellular protein catabolic process	PF00227.26:Proteasome subunit
gene-LOC110092424	389	369	562	274	209	131	NW_021318491.1	369786	394895	-	LOC110092424	--	--	--	filament-like plant protein 7 [Dendrobium catenatum]	RecName: Full=Filament-like plant protein 7; Short=AtFPP7;	SubName: Full=Filament-like plant protein 7 {ECO:0000313|EMBL:PKU87822.1};	--	--	PF05911.11:Filament-like plant protein, long coiled-coil
gene-LOC110092425	13983	12788	17428	8242	9561	5101	NW_021318491.1	242412	264651	+	LOC110092425	--	K03255 protein TIF31 | (RefSeq) protein TSS (A)	--	protein TSS [Dendrobium catenatum]	RecName: Full=Protein TSS {ECO:0000303|PubMed:21185286}; AltName: Full=TPR-domain suppressor of STIMPY {ECO:0000303|PubMed:21185286};	SubName: Full=Clustered mitochondria protein {ECO:0000313|EMBL:PKA49413.1};	Uncharacterized protein CLU1/cluA/TIF31 involved in mitochondrial morphology/distribution, also found associated with eIF-3	GO:0007049,cell cycle; GO:0007275,multicellular organism development; GO:0009737,response to abscisic acid	PF12807.7:Translation initiation factor eIF3 subunit 135
gene-LOC110092426	37836	35568	47844	25101	33055	14810	NW_021318491.1	422724	427205	-	LOC110092426	--	K02723 photosystem II PsbY protein | (RefSeq) photosystem II core complex proteins psbY, chloroplastic isoform X1 (A)	ko00195: Photosynthesis	photosystem II core complex proteins psbY, chloroplastic isoform X2 [Dendrobium catenatum]	RecName: Full=Photosystem II core complex proteins psbY, chloroplastic; AltName: Full=L-arginine-metabolizing enzyme; Short=L-AME; Contains: RecName: Full=Photosystem II protein psbY-1, chloroplastic; AltName: Full=psbY-A1; Contains: RecName: Full=Photosystem II protein psbY-2, chloroplastic; AltName: Full=psbY-A2; Flags: Precursor;	SubName: Full=Photosystem II core complex proteins psbY, chloroplastic {ECO:0000313|EMBL:PKU87827.1};	--	GO:0009535,chloroplast thylakoid membrane; GO:0016021,integral component of membrane; GO:0009523,photosystem II; GO:0030145,manganese ion binding; GO:0015979,photosynthesis	PF06298.11:Photosystem II protein Y (PsbY)
gene-LOC110092427	236	192	293	162	230	95	NW_021319178.1	2401232	2413696	-	LOC110092427	--	--	--	protein NETWORKED 1B-like isoform X1 [Dendrobium catenatum]	RecName: Full=Protein NETWORKED 1D {ECO:0000303|PubMed:22840520};	SubName: Full=Uncharacterized protein {ECO:0000313|EMBL:PKU76423.1};	--	GO:0005886,plasma membrane; GO:0003779,actin binding	PF07765.12:KIP1-like protein
gene-LOC110092428	793	902	1020	701	1050	615	NW_021318491.1	460839	507164	-	LOC110092428	--	--	--	uncharacterized protein LOC110092428 isoform X1 [Dendrobium catenatum]	--	SubName: Full=Uncharacterized protein {ECO:0000313|EMBL:PKU87831.1};	--	--	PF01266.24:FAD dependent oxidoreductase
gene-LOC110092429	227	238	282	153	203	95	NW_021318491.1	506887	514865	-	LOC110092429	--	K03501 16S rRNA (guanine527-N7)-methyltransferase [EC:2.1.1.170] | (RefSeq) uncharacterized protein LOC110092429 isoform X1 (A)	--	uncharacterized protein LOC110092429 isoform X1 [Dendrobium catenatum]	--	SubName: Full=Uncharacterized protein {ECO:0000313|EMBL:PIA62250.1};	--	--	PF02527.15:rRNA small subunit methyltransferase G
gene-LOC110092430	887	707	925	665	823	342	NW_021318491.1	448885	459909	+	LOC110092430	--	K01231 alpha-mannosidase II [EC:3.2.1.114] | (RefSeq) alpha-mannosidase 2 isoform X1 (A)	ko00510: N-Glycan biosynthesis; ko00513: Various types of N-glycan biosynthesis	alpha-mannosidase 2 isoform X1 [Dendrobium catenatum]	RecName: Full=Alpha-mannosidase 2 {ECO:0000303|PubMed:16460512}; EC=3.2.1.114 {ECO:0000269|PubMed:16460512}; AltName: Full=Golgi alpha-mannosidase II {ECO:0000303|PubMed:16460512}; Short=AMan II; Short=AtGMII {ECO:0000303|PubMed:16460512}; Short=Man II; AltName: Full=Protein hybrid glycosylation 1 {ECO:0000303|PubMed:18408158};	SubName: Full=Alpha-mannosidase II {ECO:0000313|EMBL:PKU87830.1};	Glycosyl hydrolase, family 38 - alpha-mannosidase	GO:0005768,endosome; GO:0005794,Golgi apparatus; GO:0000139,Golgi membrane; GO:0016021,integral component of membrane; GO:0005802,trans-Golgi network; GO:0004559,alpha-mannosidase activity; GO:0030246,carbohydrate binding; GO:0004572,mannosyl-oligosaccharide 1,3-1,6-alpha-mannosidase activity; GO:0046872,metal ion binding; GO:0042538,hyperosmotic salinity response; GO:0006013,mannose metabolic pr…	PF01074.22:Glycosyl hydrolases family 38 N-terminal domain
gene-LOC110092431	60	55	78	160	260	117	NW_021318491.1	437753	444792	-	LOC110092431	--	K17964 leucine-rich PPR motif-containing protein, mitochondrial | (RefSeq) pentatricopeptide repeat-containing protein At5g61990, mitochondrial (A)	--	putative pentatricopeptide repeat-containing protein At1g74580 [Dendrobium catenatum]	RecName: Full=Putative pentatricopeptide repeat-containing protein At1g74580;	SubName: Full=Pentatricopeptide repeat-containing protein {ECO:0000313|EMBL:PKU87829.1};	FOG: PPR repeat	GO:0043231,intracellular membrane-bounded organelle; GO:0004519,endonuclease activity; GO:0003723,RNA binding; GO:0009451,RNA modification	PF13041.6:PPR repeat family
gene-LOC110092432	1485	1539	1783	921	1067	848	NW_021318491.1	557426	621255	-	LOC110092432	--	K15601 lysine-specific demethylase 3 [EC:1.14.11.-] | (RefSeq) lysine-specific demethylase JMJ25-like isoform X1 (A)	--	lysine-specific demethylase JMJ25-like isoform X1 [Dendrobium catenatum]	RecName: Full=Lysine-specific demethylase JMJ25; EC=1.14.11.-; AltName: Full=Jumonji domain-containing protein 25; AltName: Full=Lysine-specific histone demethylase JMJ25; AltName: Full=Protein INCREASE IN BONSAI METHYLATION 1; AltName: Full=Protein JUMONJI 25;	SubName: Full=Uncharacterized protein {ECO:0000313|EMBL:CCB62544.1};	Putative transcription factor 5qNCA, contains JmjC domain	GO:0000785,chromatin; GO:0005634,nucleus; GO:0051213,dioxygenase activity; GO:0032454,histone demethylase activity (H3-K9 specific); GO:0046872,metal ion binding; GO:0000976,transcription regulatory region sequence-specific DNA binding; GO:0060969,negative regulation of gene silencing; GO:0006355,regulation of transcription, DNA-templated; GO:0006351,transcription, DNA-templated	PF02373.22:JmjC domain, hydroxylase
gene-LOC110092433	136	145	172	60	107	127	NW_021318491.1	523997	525368	+	LOC110092433	--	--	--	uncharacterized protein LOC110092433 [Dendrobium catenatum]	--	SubName: Full=Uncharacterized protein {ECO:0000313|EMBL:PKA57921.1};	--	--	PF01936.18:NYN domain
gene-LOC110092434	11	15	25	15	7	10	NW_021318491.1	525540	528273	-	LOC110092434	--	--	--	protein CREG1-like isoform X1 [Dendrobium catenatum]	--	SubName: Full=Uncharacterized protein {ECO:0000313|EMBL:PKU87832.1};	Cellular repressor of transcription	--	PF13883.6:Pyridoxamine 5'-phosphate oxidase
gene-LOC110092435	5902	5467	6630	4019	6980	4280	NW_021318491.1	275419	278928	+	LOC110092435	--	K13071 pheophorbide a oxygenase [EC:1.14.15.17] | (RefSeq) pheophorbide a oxygenase, chloroplastic (A)	ko00860: Porphyrin and chlorophyll metabolism	protein TIC 55, chloroplastic [Dendrobium catenatum]	RecName: Full=Protein TIC 55, chloroplastic; AltName: Full=Translocon at the inner envelope membrane of chloroplasts 55; Short=AtTIC55; AltName: Full=Translocon at the inner envelope membrane of chloroplasts 55-II; Flags: Precursor;	SubName: Full=Protein TIC 55, chloroplastic {ECO:0000313|EMBL:PKU87813.1};	--	GO:0009507,chloroplast; GO:0009941,chloroplast envelope; GO:0009706,chloroplast inner membrane; GO:0016021,integral component of membrane; GO:0051537,2 iron, 2 sulfur cluster binding; GO:0010277,chlorophyllide a oxygenase [overall] activity; GO:0046872,metal ion binding; GO:0045036,protein targeting to chloroplast	PF00355.26:Rieske [2Fe-2S] domain
gene-LOC110092436	230	271	279	341	605	273	NW_021318491.1	309057	310160	+	LOC110092436	--	--	--	uncharacterized protein LOC110092436 [Dendrobium catenatum]	--	SubName: Full=Uncharacterized protein {ECO:0000313|EMBL:PKU87816.1};	--	--	--
gene-LOC110092438	0	1	3	11	0	3	NW_021318491.1	358629	359813	-	LOC110092438	--	K14292 trimethylguanosine synthase [EC:2.1.1.-] | (RefSeq) uncharacterized LOC107850838 (A)	ko03013: RNA transport	WUSCHEL-related homeobox 4 [Dendrobium catenatum]	RecName: Full=WUSCHEL-related homeobox 4;	SubName: Full=WUSCHEL-related homeobox 4 {ECO:0000313|EMBL:PKU87821.1};	--	GO:0005634,nucleus; GO:0003677,DNA binding; GO:0051301,cell division; GO:0010087,phloem or xylem histogenesis; GO:0010067,procambium histogenesis; GO:0006355,regulation of transcription, DNA-templated; GO:0007165,signal transduction; GO:0006351,transcription, DNA-templated	PF00046.29:Homeodomain
gene-LOC110092440	58	64	38	38	42	55	NW_021318491.1	301884	305601	-	LOC110092440	--	K01904 4-coumarate--CoA ligase [EC:6.2.1.12] | (RefSeq) 4-coumarate--CoA ligase-like 1 (A)	ko00130: Ubiquinone and other terpenoid-quinone biosynthesis; ko00940: Phenylpropanoid biosynthesis	4-coumarate--CoA ligase-like 1 [Dendrobium catenatum]	RecName: Full=4-coumarate--CoA ligase-like 1; EC=6.2.1.-; AltName: Full=4-coumarate--CoA ligase isoform 10; Short=At4CL10;	SubName: Full=4-coumarate--CoA ligase-like 9 {ECO:0000313|EMBL:PKU87815.1};	Acyl-CoA synthetase	GO:0005737,cytoplasm; GO:0005783,endoplasmic reticulum; GO:0005524,ATP binding; GO:0004467,long-chain fatty acid-CoA ligase activity; GO:0031956,medium-chain fatty acid-CoA ligase activity; GO:0046949,fatty-acyl-CoA biosynthetic process; GO:0080110,sporopollenin biosynthetic process	PF00501.28:AMP-binding enzyme
gene-LOC110092441	746	724	882	1215	1364	969	NW_021318491.1	288778	299969	+	LOC110092441	--	K19720 collagen, type III, alpha | (RefSeq) hypothetical protein (A)	--	RanBP2-type zinc finger protein [Dendrobium catenatum]	RecName: Full=RanBP2-type zinc finger protein At1g67325;	SubName: Full=RanBP2-type zinc finger protein {ECO:0000313|EMBL:PKU87814.1};	Conserved Zn-finger protein	GO:0046872,metal ion binding; GO:0003729,mRNA binding	PF00641.18:Zn-finger in Ran binding protein and others
gene-LOC110092442	1549	1806	1747	1665	2893	2561	NW_021318491.1	409442	414107	-	LOC110092442	--	K02934 large subunit ribosomal protein L6e | (RefSeq) 60S ribosomal protein L6-3-like (A)	ko03010: Ribosome	60S ribosomal protein L6-3-like [Dendrobium catenatum]	RecName: Full=60S ribosomal protein L6; AltName: Full=YL16-like;	SubName: Full=60S ribosomal protein L6 {ECO:0000313|EMBL:PKU87825.1};	60s ribosomal protein L6	GO:0005840,ribosome; GO:0003735,structural constituent of ribosome; GO:0006412,translation	PF01159.19:Ribosomal protein L6e
gene-LOC110092443	10	16	13	4	0	5	NW_021318491.1	400168	401406	+	LOC110092443	--	K20893 probable galacturonosyltransferase-like 1 [EC:2.4.1.-] | (RefSeq) probable galacturonosyltransferase-like 1 (A)	--	probable galacturonosyltransferase-like 6 [Dendrobium catenatum]	RecName: Full=Probable galacturonosyltransferase-like 9; EC=2.4.1.-; AltName: Full=Like glycosyl transferase 8;	SubName: Full=Putative galacturonosyltransferase-like 9 {ECO:0000313|EMBL:PKU87823.1};	--	GO:0005794,Golgi apparatus; GO:0000139,Golgi membrane; GO:0016021,integral component of membrane; GO:0047262,polygalacturonate 4-alpha-galacturonosyltransferase activity; GO:0016757,transferase activity, transferring glycosyl groups; GO:0071555,cell wall organization; GO:0045489,pectin biosynthetic process; GO:0000271,polysaccharide biosynthetic process	PF01501.20:Glycosyl transferase family 8
gene-LOC110092444	239	171	286	306	301	224	NW_021318491.1	429933	432828	+	LOC110092444	--	K17710 pentatricopeptide repeat domain-containing protein 1 | (RefSeq) putative pentatricopeptide repeat-containing protein At2g02150 (A)	--	pentatricopeptide repeat-containing protein At1g80550, mitochondrial [Dendrobium catenatum]	RecName: Full=Pentatricopeptide repeat-containing protein At1g80550, mitochondrial; Flags: Precursor;	SubName: Full=Pentatricopeptide repeat-containing protein {ECO:0000313|EMBL:PKU87828.1};	FOG: PPR repeat	GO:0043231,intracellular membrane-bounded organelle; GO:0005739,mitochondrion; GO:0004519,endonuclease activity; GO:0003723,RNA binding; GO:0009451,RNA modification	PF13041.6:PPR repeat family
gene-LOC110092445	181	134	222	120	124	58	--	--	--	--	--	--	--	--
gene-LOC110092447	3744	3425	4540	714	1587	774	NW_021318819.1	499109	501804	+	LOC110092447	--	K00895 diphosphate-dependent phosphofructokinase [EC:2.7.1.90] | (RefSeq) pyrophosphate--fructose 6-phosphate 1-phosphotransferase subunit beta-like (A)	ko00010: Glycolysis / Gluconeogenesis; ko00030: Pentose phosphate pathway; ko00051: Fructose and mannose metabolism	pyrophosphate--fructose 6-phosphate 1-phosphotransferase subunit beta-like [Dendrobium catenatum]	RecName: Full=Pyrophosphate--fructose 6-phosphate 1-phosphotransferase subunit beta {ECO:0000255|HAMAP-Rule:MF_03185}; Short=PFP {ECO:0000255|HAMAP-Rule:MF_03185}; EC=2.7.1.90 {ECO:0000255|HAMAP-Rule:MF_03185}; AltName: Full=6-phosphofructokinase, pyrophosphate dependent {ECO:0000255|HAMAP-Rule:MF_03185}; AltName: Full=PPi-PFK {ECO:0000255|HAMAP-Rule:MF_03185}; AltName: Full=Pyrophosphate-depende…	SubName: Full=Pyrophosphate--fructose 6-phosphate 1-phosphotransferase subunit beta {ECO:0000313|EMBL:PKU82627.1};	Pyrophosphate-dependent phosphofructo-1-kinase	GO:0005737,cytoplasm; GO:0003872,6-phosphofructokinase activity; GO:0005524,ATP binding; GO:0047334,diphosphate-fructose-6-phosphate 1-phosphotransferase activity; GO:0046872,metal ion binding; GO:0006002,fructose 6-phosphate metabolic process	PF00365.20:Phosphofructokinase
gene-LOC110092449	271	266	341	358	594	555	NW_021318952.1	15245	80409	+	LOC110092449	--	--	--	hypothetical protein MA16_Dca014594 [Dendrobium catenatum]	--	SubName: Full=Uncharacterized protein {ECO:0000313|EMBL:PKU80756.1};	Predicted PhzC/PhzF-type epimerase	--	PF02567.16:Phenazine biosynthesis-like protein
gene-LOC110092450	0	0	0	0	0	3	--	--	--	--	--	--	--	--
gene-LOC110092451	903	1004	1020	1175	1596	1285	NW_021319178.1	2328553	2339304	-	LOC110092451	--	--	--	stem-specific protein TSJT1-like [Dendrobium catenatum]	RecName: Full=Stem-specific protein TSJT1;	SubName: Full=Stem-specific protein TSJT1 {ECO:0000313|EMBL:PKU76420.1};	--	--	PF12481.8:Aluminium induced protein
gene-LOC110092452	57	41	63	76	123	78	NW_021319908.1	972398	1034094	+	LOC110092452	--	--	--	uncharacterized protein LOC110092452 [Dendrobium catenatum]	--	SubName: Full=Uncharacterized protein {ECO:0000313|EMBL:PKU74026.1};	--	--	--
gene-LOC110092453	297	248	331	199	298	154	NW_021319908.1	719485	783267	+	LOC110092453	--	K11091 U1 small nuclear ribonucleoprotein A | (RefSeq) U1 small nuclear ribonucleoprotein A-like (A)	ko03040: Spliceosome	U1 small nuclear ribonucleoprotein A-like [Dendrobium catenatum]	RecName: Full=U1 small nuclear ribonucleoprotein A; Short=U1 snRNP protein A;	SubName: Full=U1 small nuclear ribonucleoprotein A {ECO:0000313|EMBL:OAY81358.1};	Spliceosomal protein snRNP-U1A/U2B	GO:0005829,cytosol; GO:0005730,nucleolus; GO:0005681,spliceosomal complex; GO:0005685,U1 snRNP; GO:0035614,snRNA stem-loop binding; GO:0030619,U1 snRNA binding; GO:0000398,mRNA splicing, via spliceosome	PF00076.22:RNA recognition motif. (a.k.a. RRM, RBD, or RNP domain)
gene-LOC110092455	6	3	16	12	13	5	NW_021319908.1	611408	615220	-	LOC110092455	--	--	--	uncharacterized protein LOC110092455 [Dendrobium catenatum]	--	SubName: Full=Uncharacterized protein {ECO:0000313|EMBL:PKA62056.1};	--	--	--
gene-LOC110092457	720	757	768	658	854	930	NW_021319908.1	287254	312174	+	LOC110092457	--	K08869 aarF domain-containing kinase | (RefSeq) protein ABC transporter 1, mitochondrial (A)	--	protein ABC transporter 1, mitochondrial [Dendrobium catenatum]	RecName: Full=Protein ABC transporter 1, mitochondrial {ECO:0000303|PubMed:9852956}; Short=ABC1At {ECO:0000303|PubMed:9852956}; Short=AtABC1 {ECO:0000303|PubMed:9852956}; EC=2.7.-.- {ECO:0000255|PROSITE-ProRule:PRU00159};	SubName: Full=Uncharacterized protein {ECO:0000313|EMBL:KJB41750.1};	ABC (ATP binding cassette) 1 protein	GO:0005743,mitochondrial inner membrane; GO:0005739,mitochondrion; GO:0005524,ATP binding; GO:0016740,transferase activity; GO:0005215,transporter activity; GO:0015996,chlorophyll catabolic process; GO:0010224,response to UV-B; GO:0006744,ubiquinone biosynthetic process	PF03109.16:ABC1 family
gene-LOC110092458	285	380	311	552	478	542	NW_021319908.1	934044	950304	+	LOC110092458	--	--	--	putative leucine-rich repeat-containing protein DDB_G0290503 [Dendrobium catenatum]	RecName: Full=Nuclear envelope-associated protein 2 {ECO:0000303|PubMed:27630107}; Short=AtNEAP2 {ECO:0000303|PubMed:27630107};	SubName: Full=Uncharacterized protein {ECO:0000313|EMBL:PKU66509.1};	--	GO:0016021,integral component of membrane; GO:0005635,nuclear envelope; GO:0005637,nuclear inner membrane; GO:0005654,nucleoplasm; GO:0043621,protein self-association	--
gene-LOC110092459	752	978	880	815	1061	1010	NW_021319908.1	812055	852390	+	LOC110092459	--	--	--	immune-associated nucleotide-binding protein 9-like [Dendrobium catenatum]	RecName: Full=Immune-associated nucleotide-binding protein 9 {ECO:0000303|PubMed:17723251}; Short=AtIAN9 {ECO:0000303|PubMed:17723251}; AltName: Full=AIG1-like protein {ECO:0000305};	SubName: Full=Protein AIG1 {ECO:0000313|EMBL:PKU66507.1};	--	GO:0005525,GTP binding	PF04548.16:AIG1 family
gene-LOC110092460	3064	2887	3763	2333	2837	2469	NW_021319178.1	2269370	2292643	+	LOC110092460	--	K11643 chromodomain-helicase-DNA-binding protein 4 [EC:3.6.4.12] | (RefSeq) CHD3-type chromatin-remodeling factor PICKLE-like (A)	--	DDT domain-containing protein PTM isoform X1 [Dendrobium catenatum]	RecName: Full=DDT domain-containing protein PTM {ECO:0000305}; AltName: Full=DDT domain-containing protein 1 {ECO:0000305}; AltName: Full=Membrane-bound transcription factor PTM {ECO:0000305}; AltName: Full=PHD type transcription factor with transmembrane domains {ECO:0000303|PubMed:21934661};	SubName: Full=Methyl-CpG-binding domain-containing protein 9 {ECO:0000313|EMBL:PKU76418.1};	Nucleosome remodeling factor, subunit NURF301/BPTF	GO:0009941,chloroplast envelope; GO:0009707,chloroplast outer membrane; GO:0016021,integral component of membrane; GO:0005634,nucleus; GO:0046872,metal ion binding; GO:0035064,methylated histone binding; GO:0010019,chloroplast-nucleus signaling pathway; GO:0045893,positive regulation of transcription, DNA-templated; GO:0006351,transcription, DNA-templated	PF00628.29:PHD-finger
gene-LOC110092461	605	855	691	1190	1405	1859	NW_021319908.1	586176	586883	-	LOC110092461	--	K09498 T-complex protein 1 subunit zeta | (RefSeq) T-complex protein 1 subunit zeta 1-like (A)	--	uncharacterized protein LOC110092461 [Dendrobium catenatum]	--	SubName: Full=Uncharacterized protein {ECO:0000313|EMBL:PKU66501.1};	--	--	PF07225.12:NADH-ubiquinone oxidoreductase B15 subunit (NDUFB4)
gene-LOC110092462	21	47	36	30	18	33	NW_021319908.1	584373	585815	-	LOC110092462	--	K08266 target of rapamycin complex subunit LST8 | (RefSeq) TOR kinase binding protein (A)	ko04136: Autophagy - other	uncharacterized protein LOC110092462 [Dendrobium catenatum]	--	SubName: Full=Uncharacterized protein {ECO:0000313|EMBL:PKU66500.1};	--	--	--
gene-LOC110092463	3647	2679	4226	1855	2820	2578	NW_021319908.1	186788	210535	-	LOC110092463	--	K12120 phytochrome A | (RefSeq) phytochrome A-like (A)	ko04712: Circadian rhythm - plant	phytochrome A-like [Dendrobium catenatum]	RecName: Full=Phytochrome type A;	SubName: Full=Phytochrome type A {ECO:0000313|EMBL:PKU66493.1};	--	GO:0005622,intracellular; GO:0000155,phosphorelay sensor kinase activity; GO:0009881,photoreceptor activity; GO:0042803,protein homodimerization activity; GO:0009584,detection of visible light; GO:0018298,protein-chromophore linkage; GO:0017006,protein-tetrapyrrole linkage; GO:0009585,red, far-red light phototransduction; GO:0006355,regulation of transcription, DNA-templated; GO:0006351,transcrip…	PF00360.20:Phytochrome region
gene-LOC110092464	116	101	136	138	100	15	NW_021319908.1	860638	868723	-	LOC110092464	--	K12741 heterogeneous nuclear ribonucleoprotein A1/A3 | (RefSeq) hypothetical protein (A)	ko03040: Spliceosome	RNA-binding protein 38-like isoform X1 [Dendrobium catenatum]	RecName: Full=Probable RNA-binding protein ARP1; AltName: Full=ABA-regulated RNA-binding protein 1 {ECO:0000303|PubMed:23040517};	SubName: Full=Glycine-rich RNA-binding protein {ECO:0000313|EMBL:PKU66508.1};	Predicted RNA-binding protein SEB4 (RRM superfamily)	GO:0005634,nucleus; GO:0003729,mRNA binding; GO:0010029,regulation of seed germination; GO:0009737,response to abscisic acid; GO:0009651,response to salt stress; GO:0009414,response to water deprivation	PF00076.22:RNA recognition motif. (a.k.a. RRM, RBD, or RNP domain)
gene-LOC110092466	1289	1262	1467	721	1334	947	NW_021318471.1	1574943	1586499	+	LOC110092466	--	K00588 caffeoyl-CoA O-methyltransferase [EC:2.1.1.104] | (RefSeq) norbelladine 4'-O-methyltransferase isoform X2 (A)	ko00940: Phenylpropanoid biosynthesis; ko00941: Flavonoid biosynthesis; ko00945: Stilbenoid, diarylheptanoid and gingerol biosynthesis	putative caffeoyl-CoA O-methyltransferase At1g67980 [Dendrobium catenatum]	RecName: Full=Norbelladine 4'-O-methyltransferase {ECO:0000303|PubMed:25061748}; Short=NpN4OMT {ECO:0000303|PubMed:25061748}; EC=2.1.1.336 {ECO:0000269|PubMed:14109227, ECO:0000269|PubMed:25061748};	SubName: Full=Caffeoyl CoA O-methyltransferase {ECO:0000313|EMBL:AIU48020.1};	O-methyltransferase	GO:0046872,metal ion binding; GO:0008171,O-methyltransferase activity	PF01596.17:O-methyltransferase
gene-LOC110092467	1613	1951	1972	4259	4624	4656	NW_021318471.1	1540684	1548723	-	LOC110092467	--	K00588 caffeoyl-CoA O-methyltransferase [EC:2.1.1.104] | (RefSeq) norbelladine 4'-O-methyltransferase isoform X1 (A)	ko00940: Phenylpropanoid biosynthesis; ko00941: Flavonoid biosynthesis; ko00945: Stilbenoid, diarylheptanoid and gingerol biosynthesis	caffeoyl-CoA O-methyltransferase-like isoform X1 [Dendrobium catenatum]	RecName: Full=Norbelladine 4'-O-methyltransferase {ECO:0000303|PubMed:25061748}; Short=NpN4OMT {ECO:0000303|PubMed:25061748}; EC=2.1.1.336 {ECO:0000269|PubMed:14109227, ECO:0000269|PubMed:25061748};	SubName: Full=Caffeoyl-CoA O-methyltransferase {ECO:0000313|EMBL:PKU87964.1};	O-methyltransferase	GO:0046872,metal ion binding; GO:0008171,O-methyltransferase activity	PF01596.17:O-methyltransferase
gene-LOC110092468	127	105	109	100	101	47	NW_021320146.1	178095	207917	-	LOC110092468	--	K07542 phosphatidylinositol glycan, class V [EC:2.4.1.-] | (RefSeq) GPI mannosyltransferase 2-like (A)	ko00563: Glycosylphosphatidylinositol (GPI)-anchor biosynthesis	GPI mannosyltransferase 2-like [Dendrobium catenatum]	--	SubName: Full=Phosphatidylinositol glycan, class V {ECO:0000313|EMBL:PKU63237.1};	Predicted Dolichyl-phosphate-mannose-protein mannosyltransferase	--	PF04188.13:Mannosyltransferase (PIG-V)
gene-LOC110092469	157	212	224	140	175	115	NW_021318471.1	1699902	1732197	-	LOC110092469	--	--	--	uncharacterized protein LOC110092469 [Dendrobium catenatum]	--	SubName: Full=Uncharacterized protein {ECO:0000313|EMBL:PKU87973.1};	--	--	PF03456.18:uDENN domain
gene-LOC110092470	7	26	16	22	30	31	NW_021318471.1	1562265	1564645	-	LOC110092470	--	K00588 caffeoyl-CoA O-methyltransferase [EC:2.1.1.104] | (RefSeq) putative caffeoyl-CoA O-methyltransferase At1g67980 (A)	ko00940: Phenylpropanoid biosynthesis; ko00941: Flavonoid biosynthesis; ko00945: Stilbenoid, diarylheptanoid and gingerol biosynthesis	putative caffeoyl-CoA O-methyltransferase At1g67980 [Dendrobium catenatum]	RecName: Full=Putative caffeoyl-CoA O-methyltransferase At1g67980; EC=2.1.1.104; AltName: Full=Trans-caffeoyl-CoA 3-O-methyltransferase; Short=CCoAMT; Short=CCoAOMT;	SubName: Full=Caffeoyl CoA O-methyltransferase {ECO:0000313|EMBL:AIU48020.1};	O-methyltransferase	GO:0005829,cytosol; GO:0042409,caffeoyl-CoA O-methyltransferase activity; GO:0046872,metal ion binding; GO:0009809,lignin biosynthetic process	PF01596.17:O-methyltransferase
gene-LOC110092471	838	909	847	1486	2202	1866	NW_021318471.1	1672465	1673437	-	LOC110092471	--	K12197 charged multivesicular body protein 1 | (RefSeq) ESCRT-related protein CHMP1 (A)	ko04144: Endocytosis	ESCRT-related protein CHMP1 [Dendrobium catenatum]	RecName: Full=ESCRT-related protein CHMP1 {ECO:0000305}; AltName: Full=Protein CHARGED MULTIVESICULAR BODY PROTEIN 1 {ECO:0000305}; AltName: Full=Protein CHROMATIN MODIFYING PROTEIN 1 {ECO:0000305};	SubName: Full=Vacuolar protein sorting-associated protein 2 like 1 {ECO:0000313|EMBL:PKU87970.1};	Vacuolar assembly/sorting protein DID2	GO:0010008,endosome membrane; GO:0015031,protein transport; GO:0007034,vacuolar transport	PF03357.21:Snf7
gene-LOC110092473	265	227	288	205	290	247	NW_021318471.1	1479381	1482697	+	LOC110092473	--	K23541 Ca2+/H+ antiporter, TMEM165/GDT1 family | (RefSeq) pentatricopeptide repeat-containing protein At3g24000, mitochondrial-like (A)	--	pentatricopeptide repeat-containing protein At3g49170, chloroplastic-like [Dendrobium catenatum]	RecName: Full=Pentatricopeptide repeat-containing protein At3g49170, chloroplastic; AltName: Full=Protein EMBRYO DEFECTIVE 2261; Flags: Precursor;	SubName: Full=putative pentatricopeptide repeat-containing protein At5g52630 {ECO:0000313|RefSeq:XP_008788871.1};	FOG: PPR repeat	GO:0009507,chloroplast; GO:0043231,intracellular membrane-bounded organelle; GO:0004519,endonuclease activity; GO:0003723,RNA binding; GO:0008270,zinc ion binding; GO:0009793,embryo development ending in seed dormancy; GO:0009451,RNA modification	PF13041.6:PPR repeat family
gene-LOC110092474	38	19	31	6	10	2	NW_021318471.1	1874025	1877961	+	LOC110092474	--	--	--	uncharacterized protein LOC110092474 isoform X1 [Dendrobium catenatum]	--	SubName: Full=Uncharacterized protein {ECO:0000313|EMBL:PKU87977.1};	--	--	PF04842.12:Plant protein of unknown function (DUF639)
gene-LOC110092475	164	241	223	268	198	203	NW_021318471.1	1049104	1069421	+	LOC110092475	--	--	--	protein POLLEN DEFECTIVE IN GUIDANCE 1 isoform X1 [Dendrobium catenatum]	RecName: Full=Protein POLLEN DEFECTIVE IN GUIDANCE 1;	SubName: Full=Protein POLLEN DEFECTIVE IN GUIDANCE 1 {ECO:0000313|EMBL:PKU87951.1};	Predicted membrane protein	GO:0005788,endoplasmic reticulum lumen; GO:0016021,integral component of membrane; GO:0009793,embryo development ending in seed dormancy; GO:0035437,maintenance of protein localization in endoplasmic reticulum; GO:0010183,pollen tube guidance	PF05346.11:Eukaryotic membrane protein family
gene-LOC110092476	2262	1875	2800	1491	1871	904	NW_021318471.1	1385282	1468731	-	LOC110092476	--	K14007 protein transport protein SEC24 | (RefSeq) protein transport protein Sec24-like CEF (A)	ko04141: Protein processing in endoplasmic reticulum	protein transport protein Sec24-like CEF [Dendrobium catenatum]	RecName: Full=Protein transport protein Sec24-like CEF;	SubName: Full=Protein transport protein Sec24-like {ECO:0000313|EMBL:PKU87958.1};	Vesicle coat complex COPII, subunit SFB3	GO:0030127,COPII vesicle coat; GO:0005829,cytosol; GO:0005789,endoplasmic reticulum membrane; GO:0033116,endoplasmic reticulum-Golgi intermediate compartment membrane; GO:0000139,Golgi membrane; GO:0008270,zinc ion binding; GO:0006888,ER to Golgi vesicle-mediated transport; GO:0006886,intracellular protein transport; GO:0006979,response to oxidative stress	PF04811.15:Sec23/Sec24 trunk domain
gene-LOC110092477	589	480	747	619	678	319	NW_021318471.1	1913953	1950156	-	LOC110092477	--	K14491 two-component response regulator ARR-B family | (RefSeq) two-component response regulator ORR21 (A)	ko04075: Plant hormone signal transduction	two-component response regulator ARR14-like [Dendrobium catenatum]	RecName: Full=Two-component response regulator ORR21 {ECO:0000305};	SubName: Full=Two-component response regulator ARR2 {ECO:0000313|EMBL:PKU87981.1};	GATA-4/5/6 transcription factors	GO:0005634,nucleus; GO:0003677,DNA binding; GO:0003700,DNA-binding transcription factor activity; GO:0009736,cytokinin-activated signaling pathway; GO:0000160,phosphorelay signal transduction system; GO:0006351,transcription, DNA-templated	PF00072.24:Response regulator receiver domain
gene-LOC110092479	1538	1739	1914	1985	2215	3065	NW_021318471.1	1961412	1996645	+	LOC110092479	--	K13148 integrator complex subunit 11 [EC:3.1.27.-] | (RefSeq) uncharacterized LOC105053331 (A)	--	E3 ubiquitin protein ligase RIE1 [Dendrobium catenatum]	RecName: Full=E3 ubiquitin protein ligase RIE1; EC=2.3.2.27; AltName: Full=Protein RING-FINGER FOR EMBRYOGENESIS 1; AltName: Full=RING-type E3 ubiquitin transferase RIE1 {ECO:0000305};	SubName: Full=E3 ubiquitin protein ligase RIE1 {ECO:0000313|EMBL:PKU87982.1};	FOG: Predicted E3 ubiquitin ligase	GO:0016021,integral component of membrane; GO:0046872,metal ion binding; GO:0061630,ubiquitin protein ligase activity; GO:0009793,embryo development ending in seed dormancy; GO:0043161,proteasome-mediated ubiquitin-dependent protein catabolic process	PF13639.6:Ring finger domain
gene-LOC110092480	31822	43263	35645	40364	60159	63166	NW_021318471.1	2155201	2160501	+	LOC110092480	--	K01915 glutamine synthetase [EC:6.3.1.2] | (RefSeq) glutamine synthetase nodule isozyme isoform X1 (A)	ko00220: Arginine biosynthesis; ko00250: Alanine, aspartate and glutamate metabolism; ko00630: Glyoxylate and dicarboxylate metabolism; ko00910: Nitrogen metabolism; ko01230: Biosynthesis of amino acids	glutamine synthetase nodule isozyme isoform X1 [Dendrobium catenatum]	RecName: Full=Glutamine synthetase nodule isozyme; Short=GS; EC=6.3.1.2; AltName: Full=Glutamate--ammonia ligase;	RecName: Full=Glutamine synthetase {ECO:0000256|RuleBase:RU004356}; EC=6.3.1.2 {ECO:0000256|RuleBase:RU004356};	Glutamine synthetase	GO:0005737,cytoplasm; GO:0005524,ATP binding; GO:0004356,glutamate-ammonia ligase activity; GO:0006542,glutamine biosynthetic process; GO:0009399,nitrogen fixation	PF00120.24:Glutamine synthetase, catalytic domain
gene-LOC110092481	567	453	705	613	782	411	NW_021318471.1	1075401	1126112	-	LOC110092481	--	K11855 ubiquitin carboxyl-terminal hydrolase 36/42 [EC:3.4.19.12] | (RefSeq) ubiquitin carboxyl-terminal hydrolase 18-like (A)	--	Ubiquitin carboxyl-terminal hydrolase 19 [Dendrobium catenatum]	RecName: Full=Ubiquitin carboxyl-terminal hydrolase 19; EC=3.4.19.12; AltName: Full=Deubiquitinating enzyme 19; Short=AtUBP19; AltName: Full=Ubiquitin thioesterase 19; AltName: Full=Ubiquitin-specific-processing protease 19;	SubName: Full=Ubiquitin carboxyl-terminal hydrolase 19 {ECO:0000313|EMBL:PKU87952.1};	Ubiquitin carboxyl-terminal hydrolase	GO:0016021,integral component of membrane; GO:0046872,metal ion binding; GO:0036459,thiol-dependent ubiquitinyl hydrolase activity; GO:0016579,protein deubiquitination; GO:0006511,ubiquitin-dependent protein catabolic process	PF00443.29:Ubiquitin carboxyl-terminal hydrolase
gene-LOC110092482	3065	2944	3457	1883	2989	1869	NW_021318471.1	2217985	2239557	-	LOC110092482	--	K03934 NADH dehydrogenase (ubiquinone) Fe-S protein 1 [EC:1.6.5.3 1.6.99.3] | (RefSeq) NADH dehydrogenase [ubiquinone] iron-sulfur protein 1, mitochondrial (A)	ko00190: Oxidative phosphorylation	NADH dehydrogenase [ubiquinone]	RecName: Full=NADH dehydrogenase [ubiquinone] iron-sulfur protein 1, mitochondrial; EC=1.6.5.3; EC=1.6.99.3; AltName: Full=76 kDa mitochondrial complex I subunit; AltName: Full=Complex I-76kD; Short=CI-76kD; AltName: Full=NADH-ubiquinone oxidoreductase 76 kDa subunit; Flags: Precursor;	SubName: Full=NADH dehydrogenase [ubiquinone] iron-sulfur protein 1, mitochondrial {ECO:0000313|EMBL:PKU87992.1};	NADH-ubiquinone oxidoreductase, NDUFS1/75 kDa subunit	GO:0009507,chloroplast; GO:0005747,mitochondrial respiratory chain complex I; GO:0051537,2 iron, 2 sulfur cluster binding; GO:0051539,4 iron, 4 sulfur cluster binding; GO:0009055,electron transfer activity; GO:0046872,metal ion binding; GO:0008137,NADH dehydrogenase (ubiquinone) activity; GO:0042773,ATP synthesis coupled electron transport; GO:0006979,response to oxidative stress	PF00384.22:Molybdopterin oxidoreductase
gene-LOC110092483	3468	3401	4600	2118	2721	1594	NW_021318471.1	1514307	1522894	-	LOC110092483	--	K14308 nuclear pore complex protein Nup54 | (RefSeq) LOW QUALITY PROTEIN: uncharacterized protein LOC106359187 (A)	ko03013: RNA transport	F-box/kelch-repeat protein At1g67480 [Dendrobium catenatum]	RecName: Full=F-box/kelch-repeat protein At1g67480;	SubName: Full=F-box/kelch-repeat protein {ECO:0000313|EMBL:PKU87961.1};	FOG: Kelch repeat	GO:0031463,Cul3-RING ubiquitin ligase complex; GO:0016567,protein ubiquitination	PF01344.25:Kelch motif
gene-LOC110092484	46	63	56	0	18	0	NW_021318471.1	912151	912801	-	LOC110092484	--	K12472 epidermal growth factor receptor substrate 15 | (RefSeq) GATA zinc finger domain-containing protein 14-like (A)	ko04144: Endocytosis	BURP domain-containing protein 3 [Dendrobium catenatum]	RecName: Full=BURP domain-containing protein 5; Short=OsBURP05; Flags: Precursor;	SubName: Full=BURP domain-containing protein 3 {ECO:0000313|EMBL:PKU87946.1};	--	--	PF03181.15:BURP domain
gene-LOC110092486	0	1	0	0	0	0	NW_021318471.1	999922	1000644	+	LOC110092486	--	K15333 tRNA guanosine-2'-O-methyltransferase [EC:2.1.1.34] | (RefSeq) uncharacterized LOC105043884 (A)	--	subtilisin-like protease SBT1.4 [Dendrobium catenatum]	RecName: Full=Subtilisin-like protease SBT1.2 {ECO:0000303|PubMed:16193095}; EC=3.4.21.- {ECO:0000305}; AltName: Full=Cucumisin-like serine protease SDD1; AltName: Full=Protein STOMATAL DENSITY AND DISTRIBUTION 1; AltName: Full=Subtilase subfamily 1 member 2 {ECO:0000303|PubMed:16193095}; Short=AtSBT1.2 {ECO:0000303|PubMed:16193095}; AltName: Full=Subtilisin-like protease SDD1 {ECO:0000303|PubMed…	SubName: Full=Subtilisin-like protease SDD1 {ECO:0000313|EMBL:PKU87950.1};	--	GO:0048046,apoplast; GO:0009897,external side of plasma membrane; GO:0004252,serine-type endopeptidase activity; GO:0042127,regulation of cell proliferation; GO:0010103,stomatal complex morphogenesis	PF00082.22:Subtilase family
gene-LOC110092488	1171	1237	1617	2092	2411	1822	NW_021319178.1	2219966	2222182	+	LOC110092488	--	--	--	uncharacterized protein LOC110092488 [Dendrobium catenatum]	RecName: Full=Calmodulin binding protein PICBP {ECO:0000305}; AltName: Full=Pathogen-induced CaM-binding protein {ECO:0000303|PubMed:12825696};	SubName: Full=Uncharacterized protein {ECO:0000313|EMBL:PKU76415.1};	--	GO:0005886,plasma membrane; GO:0005516,calmodulin binding; GO:0006952,defense response	PF07839.11:Plant calmodulin-binding domain
gene-LOC110092489	0	0	0	0	3	0	--	--	--	--	--	--	--	--
gene-LOC110092490	5	4	5	7	11	3	NW_021318471.1	1684131	1684831	+	LOC110092490	--	--	--	uncharacterized protein LOC110092490 [Dendrobium catenatum]	--	SubName: Full=Protease Do-like 2, chloroplastic {ECO:0000313|EMBL:PKU66080.1};	--	--	--
gene-LOC110092492	1	0	0	5	6	0	NW_021318471.1	1830656	1833391	+	LOC110092492	--	K14400 pre-mRNA cleavage complex 2 protein Pcf11 | (RefSeq) LOW QUALITY PROTEIN: uncharacterized protein LOC109844760 (A)	ko03015: mRNA surveillance pathway	serine/threonine-protein phosphatase 7 long form homolog [Dendrobium catenatum]	RecName: Full=Serine/threonine-protein phosphatase 7 long form homolog; EC=3.1.3.16; AltName: Full=Protein MAIN-LIKE 3 {ECO:0000303|PubMed:24635680};	SubName: Full=Serine/threonine-protein phosphatase 7 long form like {ECO:0000313|EMBL:PKU65550.1};	--	GO:0005634,nucleus; GO:0046872,metal ion binding; GO:0004721,phosphoprotein phosphatase activity	PF10536.9:Plant mobile domain
gene-LOC110092493	0	0	3	1	4	0	NW_021318471.1	1881983	1883112	-	LOC110092493	--	--	--	B3 domain-containing protein Os03g0212300-like [Dendrobium catenatum]	RecName: Full=B3 domain-containing protein REM9; AltName: Full=Auxin response factor 23; AltName: Full=Protein REPRODUCTIVE MERISTEM 9;	SubName: Full=B3 domain-containing protein REM1 {ECO:0000313|EMBL:PKU87978.1};	--	GO:0009941,chloroplast envelope; GO:0005634,nucleus; GO:0003677,DNA binding; GO:0006355,regulation of transcription, DNA-templated; GO:0009409,response to cold; GO:0006351,transcription, DNA-templated	PF02362.21:B3 DNA binding domain
gene-LOC110092496	1040	1358	1156	1331	2073	1747	NW_021319178.1	2191629	2211460	+	LOC110092496	--	--	--	uncharacterized protein LOC110092496 isoform X1 [Dendrobium catenatum]	--	SubName: Full=Uncharacterized protein {ECO:0000313|EMBL:PKU76414.1};	--	--	--
gene-LOC110092499	565	562	674	485	427	422	NW_021318471.1	2049629	2091106	+	LOC110092499	--	K14554 U3 small nucleolar RNA-associated protein 21 | (RefSeq) WD repeat-containing protein 36 (A)	ko03008: Ribosome biogenesis in eukaryotes	WD repeat-containing protein 36 [Dendrobium catenatum]	RecName: Full=Dynein assembly factor with WDR repeat domains 1; AltName: Full=Outer row dynein assembly protein 16;	SubName: Full=Katanin p80 WD40 repeat-containing subunit B1 like {ECO:0000313|EMBL:PKU87985.1};	WD repeat protein	GO:0005737,cytoplasm; GO:0005856,cytoskeleton; GO:0031514,motile cilium	PF04192.12:Utp21 specific WD40 associated putative domain
gene-LOC110092500	476	378	590	499	452	274	NW_021318471.1	1206442	1225721	+	LOC110092500	--	K20536 mitogen-activated protein kinase 3 [EC:2.7.11.24] | (RefSeq) mitogen-activated protein kinase 5-like (A)	ko04016: MAPK signaling pathway - plant; ko04626: Plant-pathogen interaction	mitogen-activated protein kinase 5-like [Dendrobium catenatum]	RecName: Full=Mitogen-activated protein kinase 5; Short=MAP kinase 5; EC=2.7.11.24; AltName: Full=Benzothiadiazole-induced MAP kinase 1; AltName: Full=MAP kinase 2; AltName: Full=Multiple stress-responsive MAP kinase 2; AltName: Full=OsBIMK1; AltName: Full=OsMAP1; AltName: Full=OsMAPK2; AltName: Full=OsMAPK5; AltName: Full=OsMPK3; AltName: Full=OsMSRMK2;	SubName: Full=Mitogen-activated protein kinase 5 {ECO:0000313|EMBL:PKU87953.1};	Mitogen-activated protein kinase	GO:0005737,cytoplasm; GO:0005634,nucleus; GO:0005524,ATP binding; GO:0004707,MAP kinase activity; GO:0010120,camalexin biosynthetic process; GO:0042742,defense response to bacterium; GO:0050832,defense response to fungus; GO:0010229,inflorescence development; GO:0048481,plant ovule development; GO:0009555,pollen development; GO:0010183,pollen tube guidance; GO:1901002,positive regulation of respo…	PF00069.25:Protein kinase domain
gene-LOC110092501	172	127	180	87	95	73	NW_021318471.1	2174481	2178005	-	LOC110092501	--	K16055 trehalose 6-phosphate synthase/phosphatase [EC:2.4.1.15 3.1.3.12] | (RefSeq) alpha,alpha-trehalose-phosphate synthase [UDP-forming] 6-like (A)	ko00500: Starch and sucrose metabolism	Alpha,alpha-trehalose-phosphate synthase [UDP-forming]	RecName: Full=Alpha,alpha-trehalose-phosphate synthase [UDP-forming] 6; EC=2.4.1.15; AltName: Full=Trehalose-6-phosphate synthase 6; Short=AtTPS6;	SubName: Full=Alpha,alpha-trehalose-phosphate synthase [UDP-forming] 6 {ECO:0000313|EMBL:PKU87991.1};	Trehalose-6-phosphate synthase component TPS1 and related subunits	GO:0005737,cytoplasm; GO:0003825,alpha,alpha-trehalose-phosphate synthase (UDP-forming) activity; GO:0004805,trehalose-phosphatase activity; GO:0005992,trehalose biosynthetic process; GO:0070413,trehalose metabolism in response to stress	PF00982.21:Glycosyltransferase family 20
gene-LOC110092502	1112	1063	1282	642	1224	829	NW_021318471.1	1795427	1810132	-	LOC110092502	--	K01148 poly(A)-specific ribonuclease [EC:3.1.13.4] | (RefSeq) uncharacterized protein LOC100193495 (A)	ko03018: RNA degradation	CRM-domain containing factor CFM3, chloroplastic/mitochondrial isoform X1 [Dendrobium catenatum]	RecName: Full=CRM-domain containing factor CFM3, chloroplastic/mitochondrial {ECO:0000305}; AltName: Full=Protein CRM FAMILY MEMBER 3 {ECO:0000303|PubMed:18799595}; Short=ZmCFM3 {ECO:0000303|PubMed:18799595}; Flags: Precursor;	SubName: Full=Chloroplastic group IIA intron splicing facilitator CRS1, chloroplastic {ECO:0000313|EMBL:PKU87975.1};	Poly(A)-specific exoribonuclease PARN	GO:0009507,chloroplast; GO:0009570,chloroplast stroma; GO:0030529,NA; GO:0005739,mitochondrion; GO:0003723,RNA binding; GO:0000373,Group II intron splicing; GO:0006397,mRNA processing	PF01985.21:CRS1 / YhbY (CRM) domain
gene-LOC110092503	1101	1260	1240	1209	1487	1477	NW_021318471.1	2005800	2020192	+	LOC110092503	--	K01184 polygalacturonase [EC:3.2.1.15] | (RefSeq) polygalacturonase (A)	ko00040: Pentose and glucuronate interconversions	ankyrin repeat-containing protein At2g01680 [Dendrobium catenatum]	RecName: Full=Ankyrin repeat-containing protein At2g01680;	SubName: Full=Ankyrin repeat-containing protein {ECO:0000313|EMBL:PKA47178.1};	FOG: Ankyrin repeat	GO:0016021,integral component of membrane; GO:0005886,plasma membrane	PF12796.7:Ankyrin repeats (3 copies)
gene-LOC110092505	702	638	875	1265	1507	1070	NW_021318471.1	1375099	1383736	+	LOC110092505	--	K09122 uncharacterized protein | (RefSeq) uncharacterized protein LOC8057957 (A)	--	uncharacterized protein LOC110092505 isoform X1 [Dendrobium catenatum]	--	SubName: Full=Uncharacterized protein {ECO:0000313|EMBL:PKU87957.1};	--	--	PF05212.12:Protein of unknown function (DUF707)
gene-LOC110092506	1954	2374	2400	1325	1964	1970	NW_021318471.1	1838640	1842244	+	LOC110092506	--	K01092 myo-inositol-1(or 4)-monophosphatase [EC:3.1.3.25] | (RefSeq) phosphatase IMPL1, chloroplastic-like isoform X1 (A)	ko00562: Inositol phosphate metabolism; ko04070: Phosphatidylinositol signaling system	protein CURVATURE THYLAKOID 1A, chloroplastic-like [Dendrobium catenatum]	RecName: Full=Protein CURVATURE THYLAKOID 1A, chloroplastic; Flags: Precursor;	SubName: Full=Uncharacterized protein {ECO:0000313|EMBL:PKU87976.1};	--	GO:0009507,chloroplast; GO:0009941,chloroplast envelope; GO:0009534,chloroplast thylakoid; GO:0009535,chloroplast thylakoid membrane; GO:0016021,integral component of membrane; GO:0010287,plastoglobule; GO:0009579,thylakoid	PF14159.6:CAAD domains of cyanobacterial aminoacyl-tRNA synthetase
gene-LOC110092507	83	68	77	54	54	55	NW_021318471.1	1319964	1349361	+	LOC110092507	--	--	--	uncharacterized protein LOC110092507 isoform X2 [Dendrobium catenatum]	--	SubName: Full=Uncharacterized protein {ECO:0000313|EMBL:PKU87955.1};	--	--	--
gene-LOC110092508	303	456	268	398	565	563	NW_021318471.1	1300720	1301419	-	LOC110092508	--	--	--	uncharacterized protein LOC110092508 [Dendrobium catenatum]	--	SubName: Full=Uncharacterized protein {ECO:0000313|EMBL:PKU87954.1};	--	--	PF12023.8:Domain of unknown function (DUF3511)
gene-LOC110092509	3321	2776	4274	2420	3192	1729	NW_021318471.1	1532167	1534334	+	LOC110092509	--	K11650 SWI/SNF-related matrix-associated actin-dependent regulator of chromatin subfamily D | (RefSeq) SWI/SNF complex component SNF12 homolog (A)	--	SWI/SNF complex component SNF12 homolog [Dendrobium catenatum]	RecName: Full=SWI/SNF complex component SNF12 homolog;	SubName: Full=SWI/SNF complex component SNF12 like {ECO:0000313|EMBL:PKU87962.1};	SWI/SNF transcription activation complex subunit	GO:0005634,nucleus; GO:0016569,covalent chromatin modification; GO:0006281,DNA repair; GO:0009909,regulation of flower development; GO:0010468,regulation of gene expression; GO:2000024,regulation of leaf development; GO:0006355,regulation of transcription, DNA-templated; GO:0010224,response to UV-B; GO:0048364,root development; GO:0006351,transcription, DNA-templated	PF02201.18:SWIB/MDM2 domain
gene-LOC110092510	415	391	497	463	581	287	NW_021318471.1	1760728	1776082	-	LOC110092510	--	K19054 frataxin [EC:1.16.3.1] | (RefSeq) frataxin, mitochondrial (A)	ko00860: Porphyrin and chlorophyll metabolism	frataxin, mitochondrial [Dendrobium catenatum]	RecName: Full=Frataxin, mitochondrial; Short=Fxn; EC=1.16.3.1; Flags: Precursor;	SubName: Full=Frataxin, mitochondrial {ECO:0000313|EMBL:PKU87974.1};	Mitochondrial matrix protein frataxin, involved in Fe/S protein biosynthesis	GO:0009507,chloroplast; GO:0005739,mitochondrion; GO:0051537,2 iron, 2 sulfur cluster binding; GO:0008199,ferric iron binding; GO:0008198,ferrous iron binding; GO:0004322,ferroxidase activity; GO:0034986,iron chaperone activity; GO:0009060,aerobic respiration; GO:0006879,cellular iron ion homeostasis; GO:0034599,cellular response to oxidative stress; GO:0006783,heme biosynthetic process; GO:00068…	PF01491.16:Frataxin-like domain
gene-LOC110092511	828	993	770	754	1097	1071	NW_021318471.1	2255078	2284062	+	LOC110092511	--	--	--	translocase of chloroplast 34, chloroplastic-like [Dendrobium catenatum]	RecName: Full=Translocase of chloroplast 34, chloroplastic; Short=AtToc34; EC=3.6.5.-; AltName: Full=34 kDa chloroplast outer envelope protein; AltName: Full=GTP-binding protein OEP34; AltName: Full=Plastid protein import 3;	SubName: Full=Translocase of chloroplast 34, chloroplastic {ECO:0000313|EMBL:PKU87993.1};	--	GO:0009507,chloroplast; GO:0009941,chloroplast envelope; GO:0009707,chloroplast outer membrane; GO:0016021,integral component of membrane; GO:0009536,plastid; GO:0005525,GTP binding; GO:0003924,GTPase activity; GO:0042802,identical protein binding; GO:0046872,metal ion binding; GO:0015450,P-P-bond-hydrolysis-driven protein transmembrane transporter activity; GO:0019750,chloroplast localization; G…	PF04548.16:AIG1 family
gene-LOC110092512	369	426	456	398	509	293	NW_021318471.1	1499992	1511678	-	LOC110092512	--	K14308 nuclear pore complex protein Nup54 | (RefSeq) nuclear pore complex protein NUP54 isoform X1 (A)	ko03013: RNA transport	nuclear pore complex protein NUP54 isoform X1 [Dendrobium catenatum]	RecName: Full=Nuclear pore complex protein NUP54 {ECO:0000303|PubMed:21189294}; AltName: Full=Nucleoporin 54;	SubName: Full=nuclear pore complex protein NUP54 {ECO:0000313|RefSeq:XP_008788864.1};	Nuclear pore complex, p54 component (sc Nup57)	GO:0005635,nuclear envelope; GO:0044613,nuclear pore central transport channel; GO:0005730,nucleolus; GO:0005487,NA; GO:0017056,structural constituent of nuclear pore; GO:0051028,mRNA transport; GO:0006607,NLS-bearing protein import into nucleus; GO:0006999,nuclear pore organization; GO:0036228,protein localization to nuclear inner membrane	PF13874.6:Nucleoporin complex subunit 54
gene-LOC110092513	621	605	859	761	761	544	NW_021319178.1	2105445	2168388	-	LOC110092513	--	K23872 putative homogalacturonan methyltransferase [EC:2.1.1.-] | (RefSeq) probable methyltransferase PMT13 (A)	--	probable methyltransferase PMT7 isoform X1 [Dendrobium catenatum]	RecName: Full=Probable methyltransferase PMT7; EC=2.1.1.-;	SubName: Full=Putative methyltransferase PMT7 {ECO:0000313|EMBL:PKU76411.1};	--	GO:0005737,cytoplasm; GO:0005768,endosome; GO:0005794,Golgi apparatus; GO:0000139,Golgi membrane; GO:0016021,integral component of membrane; GO:0005802,trans-Golgi network; GO:0008757,S-adenosylmethionine-dependent methyltransferase activity; GO:0032259,methylation	PF03141.16:Putative S-adenosyl-L-methionine-dependent methyltransferase
gene-LOC110092514	1303	1274	1567	2466	2973	2250	NW_021318471.1	1492873	1496523	+	LOC110092514	--	--	--	uncharacterized protein At3g27210-like [Dendrobium catenatum]	RecName: Full=Uncharacterized protein At3g27210;	SubName: Full=Uncharacterized protein {ECO:0000313|EMBL:PKU87960.1};	--	GO:0005886,plasma membrane	--
gene-LOC110092515	494	470	539	653	850	538	NW_021318471.1	1354319	1361912	+	LOC110092515	--	K15032 mTERF domain-containing protein, mitochondrial | (RefSeq) uncharacterized LOC100838436 (A)	--	uncharacterized protein LOC110092515 [Dendrobium catenatum]	--	SubName: Full=Uncharacterized protein {ECO:0000313|EMBL:PKU87956.1};	--	--	PF06103.11:Bacterial protein of unknown function (DUF948)
gene-LOC110092516	0	0	0	3	0	2	NW_021318471.1	1893166	1893869	-	LOC110092516	--	--	--	AN1-type zinc finger protein 5-like [Dendrobium catenatum]	RecName: Full=Zinc finger A20 and AN1 domain-containing stress-associated protein 6; Short=OsSAP6;	SubName: Full=Zinc finger A20 and AN1 domain-containing stress-associated protein 9 {ECO:0000313|EMBL:PKU87979.1};	Predicted Zn-finger protein	GO:0003677,DNA binding; GO:0008270,zinc ion binding	PF01428.16:AN1-like Zinc finger
gene-LOC110092517	6	19	22	155	237	97	NW_021318471.1	1558046	1560101	-	LOC110092517	--	K00588 caffeoyl-CoA O-methyltransferase [EC:2.1.1.104] | (RefSeq) norbelladine 4'-O-methyltransferase-like (A)	ko00940: Phenylpropanoid biosynthesis; ko00941: Flavonoid biosynthesis; ko00945: Stilbenoid, diarylheptanoid and gingerol biosynthesis	caffeoyl-CoA O-methyltransferase-like isoform X2 [Dendrobium catenatum]	RecName: Full=Norbelladine 4'-O-methyltransferase {ECO:0000303|PubMed:25061748}; Short=NpN4OMT {ECO:0000303|PubMed:25061748}; EC=2.1.1.336 {ECO:0000269|PubMed:14109227, ECO:0000269|PubMed:25061748};	SubName: Full=Caffeoyl-CoA O-methyltransferase {ECO:0000313|EMBL:PKU87963.1};	O-methyltransferase	GO:0046872,metal ion binding; GO:0008171,O-methyltransferase activity	PF01596.17:O-methyltransferase
gene-LOC110092520	323	392	393	443	560	710	NW_021319837.1	510610	511740	+	LOC110092520	--	--	--	F-box/LRR-repeat protein At3g48880-like [Dendrobium catenatum]	RecName: Full=F-box/LRR-repeat protein At3g48880;	SubName: Full=F-box/LRR-repeat protein {ECO:0000313|EMBL:PKU67426.1};	Leucine rich repeat proteins, some proteins contain F-box	--	PF12937.7:F-box-like
gene-LOC110092521	998	956	1080	680	918	644	NW_021319837.1	579234	591249	-	LOC110092521	--	K05658 ATP-binding cassette, subfamily B (MDR/TAP), member 1 [EC:3.6.3.44] | (RefSeq) ABC transporter B family member 9-like (A)	ko02010: ABC transporters	ABC transporter B family member 9-like [Dendrobium catenatum]	RecName: Full=ABC transporter B family member 4; Short=ABC transporter ABCB.4; Short=AtABCB4; AltName: Full=Multidrug resistance protein 4; AltName: Full=P-glycoprotein 4;	SubName: Full=ABC transporter B family member 4 {ECO:0000313|EMBL:PKU67429.1};	Multidrug/pheromone exporter, ABC superfamily	GO:0016021,integral component of membrane; GO:0016020,membrane; GO:0005886,plasma membrane; GO:0009506,plasmodesma; GO:0005524,ATP binding; GO:0010329,auxin efflux transmembrane transporter activity; GO:0010328,auxin influx transmembrane transporter activity; GO:0008559,xenobiotic transmembrane transporting ATPase activity; GO:0010315,auxin efflux; GO:0060919,auxin influx; GO:0009926,auxin polar …	PF00664.23:ABC transporter transmembrane region
gene-LOC110092523	296	282	380	347	432	336	NW_021319837.1	529068	532077	+	LOC110092523	--	K19984 exocyst complex component 5 | (RefSeq) uncharacterized protein LOC113272286 (A)	--	zinc finger BED domain-containing protein RICESLEEPER 1-like [Dendrobium catenatum]	RecName: Full=Zinc finger BED domain-containing protein RICESLEEPER 2; AltName: Full=Transposase-like protein RICESLEEPER 2;	SubName: Full=AC transposase {ECO:0000313|EMBL:PKU67427.1};	Tam3-transposase (Ac family)	GO:0005634,nucleus; GO:0003700,DNA-binding transcription factor activity; GO:0046872,metal ion binding; GO:0046983,protein dimerization activity; GO:0000977,RNA polymerase II regulatory region sequence-specific DNA binding; GO:0009791,post-embryonic development; GO:0006357,regulation of transcription by RNA polymerase II; GO:0006351,transcription, DNA-templated	PF14372.6:Domain of unknown function (DUF4413)
gene-LOC110092524	17	29	43	80	148	62	NW_021318711.1	1808232	1854780	+	LOC110092524	--	K00753 glycoprotein 3-alpha-L-fucosyltransferase [EC:2.4.1.214] | (RefSeq) glycoprotein 3-alpha-L-fucosyltransferase A-like isoform X1 (A)	ko00513: Various types of N-glycan biosynthesis	glycoprotein 3-alpha-L-fucosyltransferase A-like isoform X1 [Dendrobium catenatum]	RecName: Full=Glycoprotein 3-alpha-L-fucosyltransferase A; EC=2.4.1.214 {ECO:0000269|PubMed:11420147, ECO:0000269|PubMed:11696361, ECO:0000269|PubMed:21515584}; AltName: Full=Core alpha-(1,3)-fucosyltransferase; AltName: Full=Fuc-T C3; AltName: Full=FucT1; AltName: Full=FucTA; AltName: Full=Fucosyltransferase 11; Short=AtFUT11;	SubName: Full=Uncharacterized protein {ECO:0000313|EnsemblPlants:GSMUA_Achr3P06980_001};	Fucosyltransferase	GO:0005794,Golgi apparatus; GO:0032580,Golgi cisterna membrane; GO:0016021,integral component of membrane; GO:0046920,alpha-(1->3)-fucosyltransferase activity; GO:0008417,fucosyltransferase activity; GO:0018392,glycoprotein 3-alpha-L-fucosyltransferase activity; GO:0046872,metal ion binding; GO:0071555,cell wall organization; GO:0042355,L-fucose catabolic process; GO:0006486,protein glycosylation…	PF00852.19:Glycosyltransferase family 10 (fucosyltransferase) C-term
gene-LOC110092525	14	16	41	13	10	1	NW_021318711.1	1779630	1787867	+	LOC110092525	--	--	--	uncharacterized protein LOC110092525 isoform X1 [Dendrobium catenatum]	--	SubName: Full=Phospholipase A1-II 1 {ECO:0000313|EMBL:PKU83950.1};	Predicted lipase	--	PF01764.25:Lipase (class 3)
[truncated: 34,613 more rows]
