# Supplementary material for: Integrated transcriptomic and metabolomic analyses reveal flavonoid and lipid metabolic reprogramming in Dendrobiumofficinale during Colletotrichum fructicola-induced anthracnose
Source: PeerJ. 2026 Jan 15;14:e20563. doi: 10.7717/peerj.20563 (PMC12812277; doi:10.7717/peerj.20563)
Supplement: Supplemental Information 5 [file peerj-14-20563-s005.xlsx]

## Sheet: Sheet1
								OD620								OD/FW g
								CK	0.132	0.143	0.122	0.113	0.124	0.134		1.65826	1.74961	1.57521	1.50046	1.59182	1.67487
								IN-5dpi	0.212	0.231	0.312	0.233	0.156	0.178		2.32266	2.48046	3.15316	2.49707	1.85758	2.04029
								IN-15dpi	0.423	0.324	0.445	0.234	0.398	0.371		4.07501	3.25282	4.25772	2.50537	3.86739	3.64316
								IN-25dpi	0.321	0.341	0.477	0.376	0.233	0.441		3.2279	3.394	4.52348	3.68468	2.49707	4.22451
								OD700								OD/FW g
								CK	0.321	0.345	0.356	0.276	0.289	0.292		0.0642	0.069	0.0712	0.0552	0.0578	0.0584
								IN-5dpi	0.334	0.431	0.321	0.351	0.335	0.441		0.0668	0.0862	0.0642	0.0702	0.067	0.0882
								IN-15dpi	0.754	0.651	0.775	0.867	0.658	0.711		0.1508	0.1302	0.155	0.1734	0.1316	0.1422
								IN-25dpi	0.665	0.587	0.612	0.678	0.752	0.779		0.133	0.1174	0.1224	0.1356	0.1504	0.1558
							Soluble sugar
								CK	1.62504	0.0874197
								5 dpi	2.39187	0.449964	0.0109278
								15 dpi	3.60025	0.640367	0.000572606
								25 dpi	3.59194	0.727594	0.00127798
							ROS
								CK	0.0626333	0.00652554
								5 dpi	0.0737667	0.0105969	0.084406
								15 dpi	0.1472	0.0162333	0.000111816
								25 dpi	0.135767	0.0150941	0.000336568
